# Supplementary material for: Functional Genomic Analysis of Aspergillus flavus Interacting with Resistant and Susceptible Peanut
Source: MDPI journal article supplement (doi:10.3390/toxins8020046), 2016-02-15
Supplement: s1 [file toxins-114703-supplementary.pdf › toxins-114703-supplementary/toxins-114703-supplementary.pdf]

# Supplementary Materials: Functional Genomic Analysis of *Aspergillus flavus* Interacting with Resistant and Susceptible Peanut

Houmiao Wang, Yong Lei, Liying Yan, Liyun Wan, Xiaoping Ren, Silong Chen, Xiaofeng Dai, Wei Guo, Huifang Jiang and Boshou Liao

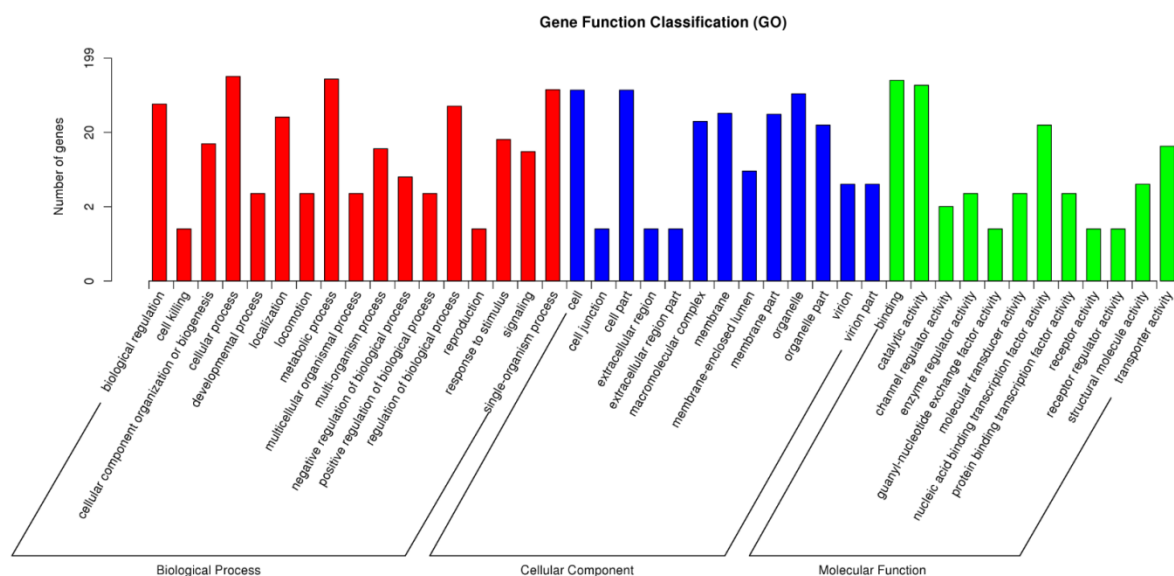

**Figure S1.** Gene Ontology (GO) classification of novel genes identified in this study. The 199 annotated novel genes were classified into three GO functional categories: biological process, cellular component and molecular function.

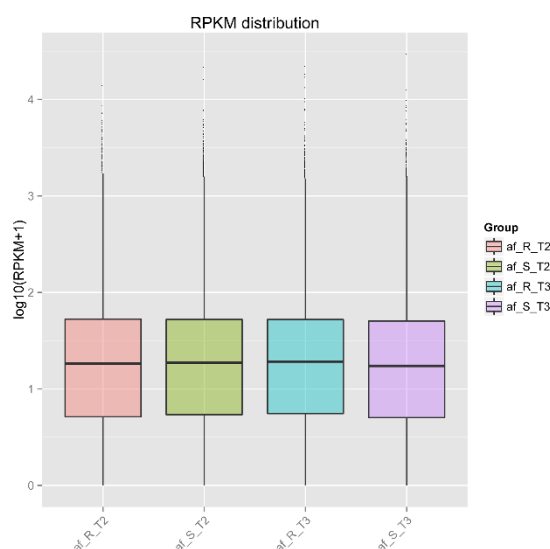

**Figure S2.** Boxplot of the log-transformed RPKM expression values across four *A. flavus* samples. RPKM: reads per kilo bases per million mapped reads. The solid horizontal line represents the median and the box encompasses lower and upper quartiles.

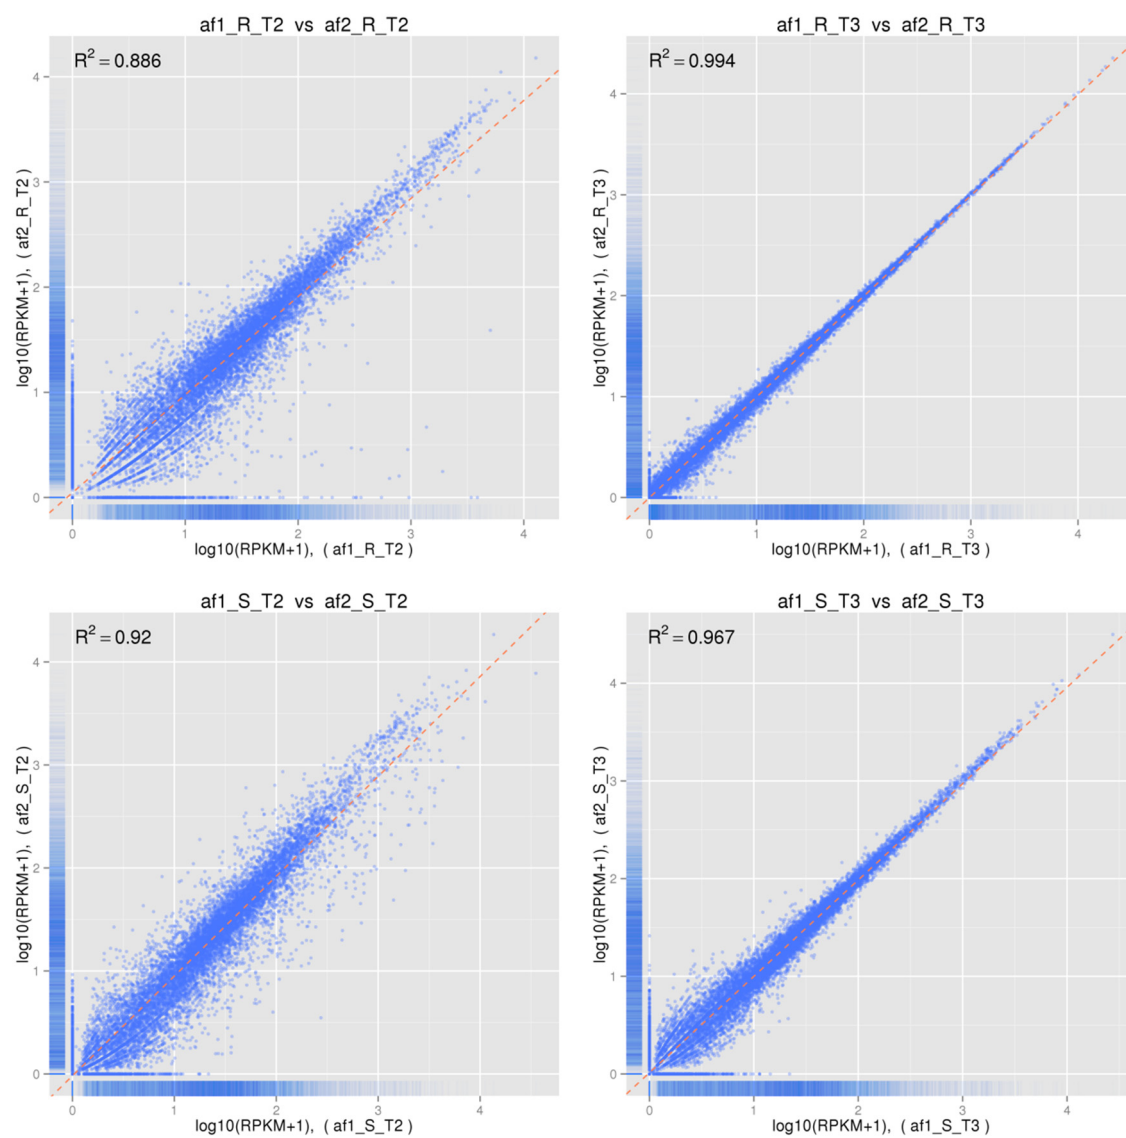

**Figure S3.** Results of the pearson correlation analysis of biological replicates.

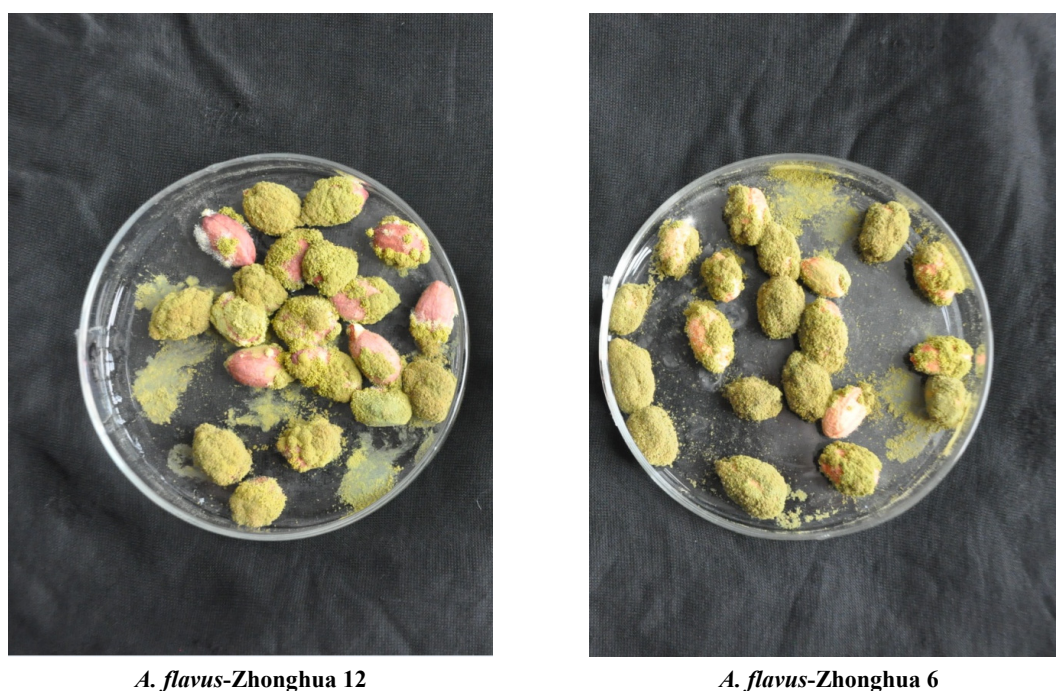

**Figure S4.** The morphological observation of *A. flavus*-peanut pathosystems at 7 d after incubation.

**Table S4.** Distribution of gene expression levels in *A. flavus*.

| Account        | Library Name | RPKM  |       |       |       |       |        |
|----------------|--------------|-------|-------|-------|-------|-------|--------|
|                |              | 0–1   | 1–3   | 3–15  | 15–60 | >60   | >1     |
| Gene Number    | af1_R_T2     | 3928  | 1030  | 3073  | 3703  | 2723  | 13,827 |
|                | af2_R_T2     | 4001  | 1335  | 2953  | 3610  | 2553  | 10,456 |
|                | af1_R_T3     | 3305  | 1510  | 3154  | 3857  | 2631  | 11,152 |
|                | af2_R_T3     | 3330  | 1505  | 3186  | 3828  | 2608  | 11,127 |
|                | af1_S_T2     | 3285  | 1354  | 3228  | 3905  | 2685  | 11,175 |
|                | af2_S_T2     | 3804  | 1391  | 3094  | 3663  | 2505  | 10,653 |
|                | af1_S_T3     | 3565  | 1482  | 3174  | 3668  | 2568  | 10,892 |
|                | af2_S_T3     | 3567  | 1473  | 3278  | 3596  | 2543  | 10,890 |
| Proportion (%) | af1_R_T2     | 27.17 | 7.12  | 21.26 | 25.61 | 18.84 | 72.84  |
|                | af2_R_T2     | 27.68 | 9.23  | 20.43 | 24.97 | 17.69 | 72.33  |
|                | af1_R_T3     | 22.86 | 10.44 | 21.82 | 26.68 | 18.20 | 77.14  |
|                | af2_R_T3     | 23.03 | 10.41 | 22.04 | 26.48 | 18.04 | 76.96  |
|                | af1_S_T2     | 22.72 | 9.37  | 22.33 | 27.01 | 18.57 | 77.27  |
|                | af2_S_T2     | 26.31 | 9.62  | 21.40 | 25.34 | 17.33 | 73.69  |
|                | af1_S_T3     | 24.66 | 10.25 | 21.95 | 25.37 | 17.76 | 75.34  |
|                | af2_S_T3     | 24.67 | 10.19 | 22.67 | 24.88 | 17.59 | 75.33  |

**Table S8.** The aflatoxin content in *A. flavus*-Zhonghua 6 and *A. flavus*-Zhonghua 12 pathosystems at different days after incubation.

| Incubation Time (d) | Aflatoxin Content (μg/kg)    |                               |
|---------------------|------------------------------|-------------------------------|
|                     | <i>A. flavus</i> -Zhonghua 6 | <i>A. flavus</i> -Zhonghua 12 |
| 1                   | 0 ± 0                        | 0 ± 0                         |
| 3                   | 3175.5 ± 232.8               | 12,687.1 ± 720.2              |
| 7                   | 21,107.6 ± 1487.4            | 195,223.8 ± 14354.4           |
