# Supplementary material for: Functional Genomic Analysis of Aspergillus flavus Interacting with Resistant and Susceptible Peanut
Source: MDPI journal article supplement (doi:10.3390/toxins8020046), 2016-02-15
Supplement: s1 [file toxins-114703-Table S1.xlsx]

## Sheet: Mapped to the reference genome
Sample name	af1_R_T1	af2_R_T1	af1_R_T2	af2_R_T2	af1_R_T3	af2_R_T3	af1_S_T1	af2_S_T1	af1_S_T2	af2_S_T2	af1_S_T3	af2_S_T3
Total clean reads	55753432	52827190	63861410	55965182	63523784	53486954	58024886	59691186	52844526	56092690	54518226	48035682
Total mapped	48766 (0.09%)	37968 (0.07%)	1345095 (2.11%)	2661667 (4.76%)	39216799 (61.74%)	33850017 (63.29%)	2420 (0%)	4137 (0.01%)	3591458 (6.8%)	8417036 (15.01%)	5680143 (10.42%)	4957651 (10.32%)
Multiple mapped	513 (0%)	344 (0%)	3226 (0.01%)	4869 (0.01%)	82034 (0.13%)	69267 (0.13%)	305 (0%)	360 (0%)	7228 (0.01%)	18345 (0.03%)	15336 (0.03%)	11492 (0.02%)
Uniquely mapped	48253 (0.09%)	37624 (0.07%)	1341869 (2.1%)	2656798 (4.75%)	39134765 (61.61%)	33780750 (63.16%)	2115 (0%)	3777 (0.01%)	3584230 (6.78%)	8398691 (14.97%)	5664807 (10.39%)	4946159 (10.3%)
Read-1	24313 (0.04%)	18997 (0.04%)	674701 (1.06%)	1343127 (2.4%)	19767526 (31.12%)	16934032 (31.66%)	1073 (0%)	1917 (0%)	1797256 (3.4%)	4211572 (7.51%)	2840439 (5.21%)	2486649 (5.18%)
Read-2	23940 (0.04%)	18627 (0.04%)	667168 (1.04%)	1313671 (2.35%)	19367239 (30.49%)	16846718 (31.5%)	1042 (0%)	1860 (0%)	1786974 (3.38%)	4187119 (7.46%)	2824368 (5.18%)	2459510 (5.12%)
Reads map to '+'	24098 (0.04%)	18822 (0.04%)	671547 (1.05%)	1328581 (2.37%)	19570639 (30.81%)	16898418 (31.59%)	1055 (0%)	1880 (0%)	1792599 (3.39%)	4200823 (7.49%)	2832356 (5.2%)	2473751 (5.15%)
Reads map to '-'	24155 (0.04%)	18802 (0.04%)	670322 (1.05%)	1328217 (2.37%)	19564126 (30.8%)	16882332 (31.56%)	1060 (0%)	1897 (0%)	1791631 (3.39%)	4197868 (7.48%)	2832451 (5.2%)	2472408 (5.15%)
Non-splice reads	37857 (0.07%)	30525 (0.06%)	1106429 (1.73%)	2157397 (3.85%)	32213977 (50.71%)	27878515 (52.12%)	1727 (0%)	3134 (0.01%)	2960864 (5.6%)	6860980 (12.23%)	4666320 (8.56%)	4073037 (8.48%)
Splice reads	10396 (0.02%)	7099 (0.01%)	235440 (0.37%)	499401 (0.89%)	6920788 (10.89%)	5902235 (11.03%)	388 (0%)	643 (0%)	623366 (1.18%)	1537711 (2.74%)	998487 (1.83%)	873122 (1.82%)
Reads mapped in proper pairs	41394 (0.07%)	30862 (0.06%)	1103176 (1.73%)	2112728 (3.78%)	33007816 (51.96%)	28155114 (52.64%)	1664 (0%)	2986 (0.01%)	2887860 (5.46%)	6790046 (12.11%)	4727154 (8.67%)	4551076 (9.47%)
Proper-paired reads map to different chrom	0 (0%)	0 (0%)	0 (0%)	0 (0%)	4 (0%)	2 (0%)	0 (0%)	0 (0%)	0 (0%)	0 (0%)	0 (0%)	0 (0%)

## Sheet: Uniquely mapped's distribution 
Sample name	af1_R_T1	af2_R_T1	af1_R_T2	af2_R_T2	af1_R_T3	af2_R_T3	af1_S_T1	af2_S_T1	af1_S_T2	af2_S_T2	af1_S_T3	af2_S_T3
Exon (%)	88.6	88.5	86.8	88.4	87.6	87.2	85.1	87.1	87.1	88.1	87.7	85.3
intron (%)	10.8	10.9	12.4	10.8	11.7	12.1	14.3	12	12.3	11.2	11.6	13.9
intergenic (%)	0.6	0.6	0.8	0.8	0.7	0.7	0.6	0.9	0.7	0.6	0.7	0.8
