# Supplementary material for: Functional Genomic Analysis of Aspergillus flavus Interacting with Resistant and Susceptible Peanut
Source: MDPI journal article supplement (doi:10.3390/toxins8020046), 2016-02-15
Supplement: s1 [file toxins-114703-Table S2.xlsx]

## Sheet: Previously annotated genes
Gene ID	Gene Name	Locus				Annotatated gene function
		Chromosome	Strand	Original span (3'-5')	Optimized span (3'-5')
CADAFLAG00000001	AFLA_071780	EQ963472	-	1195–3107		Dyp-type peroxidase family protein [Source:UniProtKB/TrEMBL;Acc:B8MVM1]
CADAFLAG00000002	AFLA_071790	EQ963472	+	4786-6873	4728-7117	Galactose oxidase, putative [Source:UniProtKB/TrEMBL;Acc:B8MVM2]
CADAFLAG00000003	AFLA_071800	EQ963472	-	6996–8443		Branched-chain amino acid aminotransferase, putative [Source:UniProtKB/TrEMBL;Acc:B8MVM3]
CADAFLAG00000004	AFLA_071910	EQ963472	-	9225–10798		MFS tranporter, putative [Source:UniProtKB/TrEMBL;Acc:B8MVM4]
CADAFLAG00000005	AFLA_071920	EQ963472	-	11398–13024		Class III aminotransferase, putative [Source:UniProtKB/TrEMBL;Acc:B8MVM5]
CADAFLAG00000006	AFLA_072030	EQ963472	+	15076–15808		Putative uncharacterized protein [Source:UniProtKB/TrEMBL;Acc:B8MVM6]
CADAFLAG00000007	AFLA_072140	EQ963472	-	18032-21412	18032-21663	Cysteine-rich secretory protein, putative [Source:UniProtKB/TrEMBL;Acc:B8MVM7]
CADAFLAG00000008	AFLA_072150	EQ963472	+	22589–24237		Cytochrome P450, putative [Source:UniProtKB/TrEMBL;Acc:B8MVM8]
CADAFLAG00000009	AFLA_072160	EQ963472	+	25098–26177		Putative uncharacterized protein [Source:UniProtKB/TrEMBL;Acc:B8MVM9]
CADAFLAG00000010	AFLA_072170	EQ963472	-	26507–27835		ADP-ribosylglycohydrolase, putative [Source:UniProtKB/TrEMBL;Acc:B8MVN0]
CADAFLAG00000011	AFLA_072280	EQ963472	+	28311-30396	28311-30846	Putative uncharacterized protein [Source:UniProtKB/TrEMBL;Acc:B8MVN1]
CADAFLAG00000012	AFLA_072290	EQ963472	+	30409–30846		Putative uncharacterized protein [Source:UniProtKB/TrEMBL;Acc:B8MVN2]
CADAFLAG00000013	AFLA_072300	EQ963472	-	31135–31377		Putative uncharacterized protein [Source:UniProtKB/TrEMBL;Acc:B8MVN3]
CADAFLAG00000014	AFLA_072310	EQ963472	-	31678–32568		Putative uncharacterized protein [Source:UniProtKB/TrEMBL;Acc:B8MVN4]
CADAFLAG00000015	AFLA_072320	EQ963472	+	36692–38517		Sugar transporter, putative [Source:UniProtKB/TrEMBL;Acc:B8MVN5]
CADAFLAG00000016	AFLA_072330	EQ963472	-	38946–40199		Disulfide oxidoreductase, putative [Source:UniProtKB/TrEMBL;Acc:B8MVN6]
CADAFLAG00000017	AFLA_072340	EQ963472	+	41026–42599		Alcohol dehydrogenase, putative [Source:UniProtKB/TrEMBL;Acc:B8MVN7]
CADAFLAG00000018	AFLA_072350	EQ963472	-	47570–48226		Putative uncharacterized protein [Source:UniProtKB/TrEMBL;Acc:B8MVN8]
CADAFLAG00000019	AFLA_072360	EQ963472	+	55726–57538		Benzoate 4-monooxygenase cytochrome P450, putative [Source:UniProtKB/TrEMBL;Acc:B8MVN9]
CADAFLAG00000020	AFLA_072370	EQ963472	+	58521–59587		Hexokinase, putative [Source:UniProtKB/TrEMBL;Acc:B8MVP0]
CADAFLAG00000021	AFLA_072380	EQ963472	-	60785-62017	60785-62067	Putative uncharacterized protein [Source:UniProtKB/TrEMBL;Acc:B8MVP1]
CADAFLAG00000022	AFLA_072390	EQ963472	-	62958–63850		Srpk, putative [Source:UniProtKB/TrEMBL;Acc:B8MVP2]
CADAFLAG00000023	AFLA_072400	EQ963472	-	64480–65016		Putative uncharacterized protein [Source:UniProtKB/TrEMBL;Acc:B8MVP3]
CADAFLAG00000024	AFLA_072410	EQ963472	-	65240–65889		Putative uncharacterized protein [Source:UniProtKB/TrEMBL;Acc:B8MVP4]
CADAFLAG00000025	AFLA_072420	EQ963472	-	66724-73457	65240-73865	Putative uncharacterized protein [Source:UniProtKB/TrEMBL;Acc:B8MVP5]
CADAFLAG00000026	AFLA_072430	EQ963472	+	78135-80851	77707-81132	Putative uncharacterized protein [Source:UniProtKB/TrEMBL;Acc:B8MVP6]
CADAFLAG00000027	AFLA_072440	EQ963472	-	81222–81840		Putative uncharacterized protein [Source:UniProtKB/TrEMBL;Acc:B8MVP7]
CADAFLAG00000028	AFLA_072450	EQ963472	+	83496–84410		Putative uncharacterized protein [Source:UniProtKB/TrEMBL;Acc:B8MVP8]
CADAFLAG00000029	AFLA_072460	EQ963472	-	85021-88813	84744-89295	Putative uncharacterized protein [Source:UniProtKB/TrEMBL;Acc:B8MVP9]
CADAFLAG00000030	AFLA_072470	EQ963472	-	89692–90713		Putative uncharacterized protein [Source:UniProtKB/TrEMBL;Acc:B8MVQ0]
CADAFLAG00000031	AFLA_072480	EQ963472	+	91611–92528		Putative uncharacterized protein [Source:UniProtKB/TrEMBL;Acc:B8MVQ1]
CADAFLAG00000032	AFLA_072490	EQ963472	-	92876–93196		Putative uncharacterized protein [Source:UniProtKB/TrEMBL;Acc:B8MVQ2]
CADAFLAG00000033	AFLA_072500	EQ963472	+	93979-95894	93744-95894	Putative uncharacterized protein [Source:UniProtKB/TrEMBL;Acc:B8MVQ3]
CADAFLAG00000034	AFLA_072510	EQ963472	+	99301–100224		Putative uncharacterized protein [Source:UniProtKB/TrEMBL;Acc:B8MVQ4]
CADAFLAG00000035	AFLA_072520	EQ963472	+	100393–101539		3-hydroxyisobutyrate dehydrogenase, putative [Source:UniProtKB/TrEMBL;Acc:B8MVQ5]
CADAFLAG00000036	AFLA_072530	EQ963472	+	102606–104219		Allantoate permease, putative [Source:UniProtKB/TrEMBL;Acc:B8MVQ6]
CADAFLAG00000037	AFLA_072540	EQ963472	+	105046–106374		3-hydroxyisobutyrate dehydrogenase, putative [Source:UniProtKB/TrEMBL;Acc:B8MVQ7]
CADAFLAG00000038	AFLA_072550	EQ963472	-	107274–109390		Dimethylaniline monooxygenase, putative [Source:UniProtKB/TrEMBL;Acc:B8MVQ8]
CADAFLAG00000039	AFLA_072560	EQ963472	+	109821-114135	109821-114519	5-oxoprolinase, putative [Source:UniProtKB/TrEMBL;Acc:B8MVQ9]
CADAFLAG00000040	AFLA_072570	EQ963472	-	114454–115749		Putative uncharacterized protein [Source:UniProtKB/TrEMBL;Acc:B8MVR0]
CADAFLAG00000041	AFLA_072580	EQ963472	+	117159–117584		Putative uncharacterized protein [Source:UniProtKB/TrEMBL;Acc:B8MVR1]
CADAFLAG00000042	AFLA_072590	EQ963472	-	117814–119261		Putative uncharacterized protein [Source:UniProtKB/TrEMBL;Acc:B8MVR2]
CADAFLAG00000043	AFLA_072600	EQ963472	+	120414-122406	119822-122758	Uracil permease, putative [Source:UniProtKB/TrEMBL;Acc:B8MVR3]
CADAFLAG00000044	AFLA_072610	EQ963472	-	122662-123114	122382-123537	Putative uncharacterized protein [Source:UniProtKB/TrEMBL;Acc:B8MVR4]
CADAFLAG00000045	AFLA_072620	EQ963472	+	124035–125841		Proline-specific permease, putative [Source:UniProtKB/TrEMBL;Acc:B8MVR5]
CADAFLAG00000046	AFLA_072630	EQ963472	+	126824-127951	126115-129800	24-dehydrocholesterol reductase, putative [Source:UniProtKB/TrEMBL;Acc:B8MVR6]
CADAFLAG00000047	AFLA_072640	EQ963472	+	128441–129328		Gluconate 5-dehydrogenase, putative [Source:UniProtKB/TrEMBL;Acc:B8MVR7]
CADAFLAG00000048	AFLA_072650	EQ963472	-	129702-131250	129442-132226	Salicylate hydroxylase, putative [Source:UniProtKB/TrEMBL;Acc:B8MVR8]
CADAFLAG00000049	AFLA_072660	EQ963472	-	131512–132159		Putative uncharacterized protein [Source:UniProtKB/TrEMBL;Acc:B8MVR9]
CADAFLAG00000050	AFLA_072670	EQ963472	+	133492–134547		Zinc-iron transporter, putative [Source:UniProtKB/TrEMBL;Acc:B8MVS0]
CADAFLAG00000051	AFLA_072680	EQ963472	+	136321-137175	136321-137717	Putative uncharacterized protein [Source:UniProtKB/TrEMBL;Acc:B8MVS1]
CADAFLAG00000052	AFLA_072690	EQ963472	+	138028–138822		Putative uncharacterized protein [Source:UniProtKB/TrEMBL;Acc:B8MVS2]
CADAFLAG00000053	AFLA_072700	EQ963472	+	139157-139951	137842-140179	Probable cutinase 1 [Source:UniProtKB/Swiss-Prot;Acc:B8MVS3]
CADAFLAG00000054	AFLA_072710	EQ963472	-	140733-140952	140644-142492	Putative uncharacterized protein [Source:UniProtKB/TrEMBL;Acc:B8MVS4]
CADAFLAG00000055	AFLA_072720	EQ963472	-	141154–142467		Putative uncharacterized protein [Source:UniProtKB/TrEMBL;Acc:B8MVS5]
CADAFLAG00000056	AFLA_072730	EQ963472	-	144196-145810	143757-146801	Amino acid transporter, putative [Source:UniProtKB/TrEMBL;Acc:B8MVS6]
CADAFLAG00000057	AFLA_072740	EQ963472	+	147540-149163	147540-150514	Proline oxidase Put1, putative [Source:UniProtKB/TrEMBL;Acc:B8MVS7]
CADAFLAG00000058	AFLA_072750	EQ963472	+	149562–150514		Pyrroline-5-carboxylate reductase, putative [Source:UniProtKB/TrEMBL;Acc:B8MVS8]
CADAFLAG00000059	AFLA_072760	EQ963472	-	150624–151547		Putative uncharacterized protein [Source:UniProtKB/TrEMBL;Acc:B8MVS9]
CADAFLAG00000060	AFLA_072770	EQ963472	+	151862–153719		Pyrroline-5-carboxylate dehydrogenase, putative [Source:UniProtKB/TrEMBL;Acc:B8MVT0]
CADAFLAG00000061	AFLA_072780	EQ963472	+	154393-155738	154306-156033	Sarcosine oxidase, putative [Source:UniProtKB/TrEMBL;Acc:B8MVT1]
CADAFLAG00000062	AFLA_072790	EQ963472	-	156218-158722	156218-159736	Putative uncharacterized protein [Source:UniProtKB/TrEMBL;Acc:B8MVT2]
CADAFLAG00000063	AFLA_072800	EQ963472	-	160216–160524		Putative uncharacterized protein [Source:UniProtKB/TrEMBL;Acc:B8MVT3]
CADAFLAG00000064	AFLA_072810	EQ963472	+	162079–162870		Putative uncharacterized protein [Source:UniProtKB/TrEMBL;Acc:B8MVT4]
CADAFLAG00000065	AFLA_072820	EQ963472	-	163299–164237		Metallophosphoesterase domain-containing protein, putative [Source:UniProtKB/TrEMBL;Acc:B8MVT5]
CADAFLAG00000066	AFLA_072830	EQ963472	-	164878-166562	164743-166938	Sugar transporter, putative [Source:UniProtKB/TrEMBL;Acc:B8MVT6]
CADAFLAG00000067	AFLA_072840	EQ963472	-	167326–169113		Aconitase, putative [Source:UniProtKB/TrEMBL;Acc:B8MVT7]
CADAFLAG00000068	AFLA_072850	EQ963472	-	169213–169855		Aconitase, mitochondrial, putative [Source:UniProtKB/TrEMBL;Acc:B8MVT8]
CADAFLAG00000069	AFLA_072860	EQ963472	+	170179–170937		Putative uncharacterized protein [Source:UniProtKB/TrEMBL;Acc:B8MVT9]
CADAFLAG00000070	AFLA_072870	EQ963472	-	171020-172488	170851-173795	Putative uncharacterized protein [Source:UniProtKB/TrEMBL;Acc:B8MVU0]
CADAFLAG00000071	AFLA_072880	EQ963472	-	172739–173722		Putative uncharacterized protein [Source:UniProtKB/TrEMBL;Acc:B8MVU1]
CADAFLAG00000072	AFLA_072890	EQ963472	-	174340–175279		Mitochondrial solute carrier, putative [Source:UniProtKB/TrEMBL;Acc:B8MVU2]
CADAFLAG00000073	AFLA_072900	EQ963472	+	175732–176797		Putative uncharacterized protein [Source:UniProtKB/TrEMBL;Acc:B8MVU3]
CADAFLAG00000074	AFLA_072910	EQ963472	+	177268-178537	177169-178697	Putative uncharacterized protein [Source:UniProtKB/TrEMBL;Acc:B8MVU4]
CADAFLAG00000075	AFLA_072920	EQ963472	-	179587-181053	178973-181116	Amino acid transporter, putative [Source:UniProtKB/TrEMBL;Acc:B8MVU5]
CADAFLAG00000076	AFLA_072930	EQ963472	+	183355–184605		Monooxygenase, putative [Source:UniProtKB/TrEMBL;Acc:B8MVU6]
CADAFLAG00000077	AFLA_072940	EQ963472	-	185116–185661		Putative uncharacterized protein [Source:UniProtKB/TrEMBL;Acc:B8MVU7]
CADAFLAG00000078	AFLA_072950	EQ963472	-	185680-186403	185116-186403	Putative uncharacterized protein [Source:UniProtKB/TrEMBL;Acc:B8MVU8]
CADAFLAG00000079	AFLA_072960	EQ963472	-	187390–189731		Glutamate carboxypeptidase, putative [Source:UniProtKB/TrEMBL;Acc:B8MVU9]
CADAFLAG00000080	AFLA_072970	EQ963472	+	191817-192532	191817-193696	Putative uncharacterized protein [Source:UniProtKB/TrEMBL;Acc:B8MVV0]
CADAFLAG00000081	AFLA_072980	EQ963472	-	193632-195604	192616-195855	Bicyclomycin resistance protein, putative [Source:UniProtKB/TrEMBL;Acc:B8MVV1]
CADAFLAG00000082	AFLA_072990	EQ963472	+	196561–197961		Putative uncharacterized protein [Source:UniProtKB/TrEMBL;Acc:B8MVV2]
CADAFLAG00000083	AFLA_073000	EQ963472	-	198461–199081		Putative uncharacterized protein [Source:UniProtKB/TrEMBL;Acc:B8MVV3]
CADAFLAG00000084	AFLA_073010	EQ963472	-	202210–203325		Putative uncharacterized protein [Source:UniProtKB/TrEMBL;Acc:B8MVV4]
CADAFLAG00000085	AFLA_073020	EQ963472	-	206476–206880		Putative uncharacterized protein [Source:UniProtKB/TrEMBL;Acc:B8MVV5]
CADAFLAG00000086	AFLA_073030	EQ963472	-	208248-210254	207907-210615	Amino acid transporter, putative [Source:UniProtKB/TrEMBL;Acc:B8MVV6]
CADAFLAG00000087	AFLA_073040	EQ963472	-	211066-212320	210968-212590	Putative uncharacterized protein [Source:UniProtKB/TrEMBL;Acc:B8MVV7]
CADAFLAG00000088	AFLA_073050	EQ963472	+	213376-214884	211853-215034	Monooxygenase, putative [Source:UniProtKB/TrEMBL;Acc:B8MVV8]
CADAFLAG00000089	AFLA_073060	EQ963472	+	216029-219197	215703-219398	UDP-glucose,sterol transferase, putative [Source:UniProtKB/TrEMBL;Acc:B8MVV9]
CADAFLAG00000090	AFLA_073070	EQ963472	-	219309–220331		Arabinan-endo 1,5-alpha-L-arabinase, putative [Source:UniProtKB/TrEMBL;Acc:B8MVW0]
CADAFLAG00000091	AFLA_073080	EQ963472	-	222585–223712		Arabinosidase, putative [Source:UniProtKB/TrEMBL;Acc:B8MVW1]
CADAFLAG00000092	AFLA_073090	EQ963472	-	225541-226472	225530-227522	Putative uncharacterized protein [Source:UniProtKB/TrEMBL;Acc:B8MVW2]
CADAFLAG00000093	AFLA_073100	EQ963472	-	227838–228758		Putative uncharacterized protein [Source:UniProtKB/TrEMBL;Acc:B8MVW3]
CADAFLAG00000094	AFLA_073110	EQ963472	+	230971-231377	230355-231700	Putative uncharacterized protein [Source:UniProtKB/TrEMBL;Acc:B8MVW4]
CADAFLAG00000095	AFLA_073120	EQ963472	+	234482–234859		Putative uncharacterized protein [Source:UniProtKB/TrEMBL;Acc:B8MVW5]
CADAFLAG00000096	AFLA_073130	EQ963472	-	236102–238023		Cytochrome P450 oxidoreductase OrdA-like, putative [Source:UniProtKB/TrEMBL;Acc:B8MVW6]
CADAFLAG00000097	AFLA_073140	EQ963472	-	240149-241544	239897-242005	Cytochrome P450, putative [Source:UniProtKB/TrEMBL;Acc:B8MVW7]
CADAFLAG00000098	AFLA_073150	EQ963472	+	242276-244032	242276-244297	SAM domain methyltransferase, putative [Source:UniProtKB/TrEMBL;Acc:B8MVW8]
CADAFLAG00000099	AFLA_073160	EQ963472	+	245345-247107	245122-247107	Zinc/cadmium resistance protein [Source:UniProtKB/TrEMBL;Acc:B8MVW9]
CADAFLAG00000100	AFLA_073170	EQ963472	+	247737-249776	247562-249978	Manganese ion homeostasis (Fr), putative [Source:UniProtKB/TrEMBL;Acc:B8MVX0]
CADAFLAG00000101	AFLA_073180	EQ963472	+	251681-253203	250369-253480	MFS monosaccharide transporter, putative [Source:UniProtKB/TrEMBL;Acc:B8MVX1]
CADAFLAG00000102	AFLA_073190	EQ963472	+	253977–255905		Ab-hydrolase associated lipase, putative [Source:UniProtKB/TrEMBL;Acc:B8MVX2]
CADAFLAG00000103	AFLA_073200	EQ963472	+	256930-257939	256746-258416	Putative uncharacterized protein [Source:UniProtKB/TrEMBL;Acc:B8MVX3]
CADAFLAG00000104	AFLA_073210	EQ963472	-	258968-260762	258765-261309	Oxalate decarboxylase, putative [Source:UniProtKB/TrEMBL;Acc:B8MVX4]
CADAFLAG00000105	AFLA_073220	EQ963472	-	263052-264232	261966-265435	Putative uncharacterized protein [Source:UniProtKB/TrEMBL;Acc:B8MVX5]
CADAFLAG00000106	AFLA_073230	EQ963472	-	264321–265249		Putative uncharacterized protein [Source:UniProtKB/TrEMBL;Acc:B8MVX6]
CADAFLAG00000107	AFLA_073240	EQ963472	-	266328-267181	266328-267293	Putative uncharacterized protein [Source:UniProtKB/TrEMBL;Acc:B8MVX7]
CADAFLAG00000108	AFLA_073250	EQ963472	+	269843-270139	269561-270895	Putative uncharacterized protein [Source:UniProtKB/TrEMBL;Acc:B8MVX8]
CADAFLAG00000109	AFLA_073260	EQ963472	+	273592-275214	272645-275917	Hexokinase, putative [Source:UniProtKB/TrEMBL;Acc:B8MVX9]
CADAFLAG00000110	AFLA_073270	EQ963472	-	275663–276667		Putative uncharacterized protein [Source:UniProtKB/TrEMBL;Acc:B8MVY0]
CADAFLAG00000111	AFLA_073280	EQ963472	+	277043-277949	276863-278674	Putative uncharacterized protein [Source:UniProtKB/TrEMBL;Acc:B8MVY1]
CADAFLAG00000112	AFLA_073290	EQ963472	-	278577-279866	277854-280112	Phospho-2-dehydro-3-deoxyheptonate aldolase [Source:UniProtKB/TrEMBL;Acc:B8MVY2]
CADAFLAG00000113	AFLA_073300	EQ963472	-	281233-281497	281233-281623	Putative uncharacterized protein [Source:UniProtKB/TrEMBL;Acc:B8MVY3]
CADAFLAG00000114	AFLA_073310	EQ963472	+	281558-282519	281023-284657	Putative uncharacterized protein [Source:UniProtKB/TrEMBL;Acc:B8MVY4]
CADAFLAG00000115	AFLA_073320	EQ963472	+	283292–284533		3-ketoacyl-CoA thiolase (POT1), putative [Source:UniProtKB/TrEMBL;Acc:B8MVY5]
CADAFLAG00000116	AFLA_073330	EQ963472	+	284831–286163		Putative uncharacterized protein [Source:UniProtKB/TrEMBL;Acc:B8MVY6]
CADAFLAG00000117	AFLA_073340	EQ963472	-	286402–287389		Putative uncharacterized protein [Source:UniProtKB/TrEMBL;Acc:B8MVY7]
CADAFLAG00000118	AFLA_073350	EQ963472	+	287630–289567		Protein kinase C substrate, putative [Source:UniProtKB/TrEMBL;Acc:B8MVY8]
CADAFLAG00000119	AFLA_073360	EQ963472	+	290835-291212	290835-291274	Putative uncharacterized protein [Source:UniProtKB/TrEMBL;Acc:B8MVY9]
CADAFLAG00000120	AFLA_073370	EQ963472	+	291976–293526		Prp4, putative [Source:UniProtKB/TrEMBL;Acc:B8MVZ0]
CADAFLAG00000121	AFLA_073380	EQ963472	-	294183–294956		Putative uncharacterized protein [Source:UniProtKB/TrEMBL;Acc:B8MVZ1]
CADAFLAG00000122	AFLA_073390	EQ963472	+	297627–298703		3-oxoacyl-[acyl-carrier-protein] reductase, putative [Source:UniProtKB/TrEMBL;Acc:B8MVZ2]
CADAFLAG00000123	AFLA_073400	EQ963472	+	304423-306367	299176-307460	Topoisomerase family protein TRF4, putative [Source:UniProtKB/TrEMBL;Acc:B8MVZ3]
CADAFLAG00000124	AFLA_073410	EQ963472	-	307370–308788		L-galactose dehydrogenase (L-GalDH), putative [Source:UniProtKB/TrEMBL;Acc:B8MVZ4]
CADAFLAG00000125	AFLA_073420	EQ963472	-	310008–310503		Cochaperone Pam16 [Source:UniProtKB/TrEMBL;Acc:B8MVZ5]
CADAFLAG00000126	AFLA_073430	EQ963472	+	311614-313693	311093-313950	Integral peroxisomal membrane protein [Source:UniProtKB/TrEMBL;Acc:B8MVZ6]
CADAFLAG00000127	AFLA_073440	EQ963472	-	313854-315681	313596-315933	C6 transcription factor, putative [Source:UniProtKB/TrEMBL;Acc:B8MVZ7]
CADAFLAG00000128	AFLA_073450	EQ963472	+	316631-318871	316443-319143	Amine oxidase [Source:UniProtKB/TrEMBL;Acc:B8MVZ8]
CADAFLAG00000129	AFLA_073460	EQ963472	-	319068-321233	318775-321451	Cyclopropane-fatty-acyl-phospholipid synthase, putative [Source:UniProtKB/TrEMBL;Acc:B8MVZ9]
CADAFLAG00000130	AFLA_073470	EQ963472	-	322315-323694	322315-323886	Putative uncharacterized protein [Source:UniProtKB/TrEMBL;Acc:B8MW00]
CADAFLAG00000131	AFLA_073480	EQ963472	+	324198-324959	324017-325076	Tropomyosin, putative [Source:UniProtKB/TrEMBL;Acc:B8MW01]
CADAFLAG00000132	AFLA_073490	EQ963472	-	325250–325965		Protein required for cell viability Rrp17, putative [Source:UniProtKB/TrEMBL;Acc:B8MW02]
CADAFLAG00000133	AFLA_073500	EQ963472	+	326256-327407	325944-330153	Putative uncharacterized protein [Source:UniProtKB/TrEMBL;Acc:B8MW03]
CADAFLAG00000134	AFLA_073510	EQ963472	+	328233–329246		Putative uncharacterized protein [Source:UniProtKB/TrEMBL;Acc:B8MW04]
CADAFLAG00000135	AFLA_073520	EQ963472	-	329956-331396	329163-331629	Protein-ER retention protein (Erd1), putative [Source:UniProtKB/TrEMBL;Acc:B8MW05]
CADAFLAG00000136	AFLA_073530	EQ963472	+	331964-333085	331841-333723	Peroxisome biosynthesis protein (Peroxin-10), putative [Source:UniProtKB/TrEMBL;Acc:B8MW06]
CADAFLAG00000137	AFLA_073540	EQ963472	-	333729-334877	332988-335303	3-5 exonuclease, putative [Source:UniProtKB/TrEMBL;Acc:B8MW07]
CADAFLAG00000138	AFLA_073550	EQ963472	+	335604-336160	335479-339817	Small nuclear ribonucleoprotein (LSM5), putative [Source:UniProtKB/TrEMBL;Acc:B8MW08]
CADAFLAG00000139	AFLA_073560	EQ963472	+	341714-343630	341225-343975	Amino acid permease (Gap1), putative [Source:UniProtKB/TrEMBL;Acc:B8MW09]
CADAFLAG00000140	AFLA_073570	EQ963472	+	344680-347568	344179-348365	RhoGAP and Fes/CIP4 domain protein [Source:UniProtKB/TrEMBL;Acc:B8MW10]
CADAFLAG00000141	AFLA_073580	EQ963472	-	348267-350312	347471-350437	Cell division control protein Cdc6, putative [Source:UniProtKB/TrEMBL;Acc:B8MW11]
CADAFLAG00000142	AFLA_073590	EQ963472	+	351045-352693	350733-353036	UBX domain protein (Ubx5), putative [Source:UniProtKB/TrEMBL;Acc:B8MW12]
CADAFLAG00000143	AFLA_073600	EQ963472	-	355308-357089	353438-357202	Cytochrome P450, putative [Source:UniProtKB/TrEMBL;Acc:B8MW13]
CADAFLAG00000144	AFLA_073610	EQ963472	+	357859–358722		Putative uncharacterized protein [Source:UniProtKB/TrEMBL;Acc:B8MW14]
CADAFLAG00000145	AFLA_073620	EQ963472	-	359239–359807		Putative uncharacterized protein [Source:UniProtKB/TrEMBL;Acc:B8MW15]
CADAFLAG00000146	AFLA_073630	EQ963472	+	362472-364684	361852-365758	Ste20-like serine/threonine protein kinase, putative [Source:UniProtKB/TrEMBL;Acc:B8MW16]
CADAFLAG00000147	AFLA_073640	EQ963472	-	365662-368494	364586-368665	C6 transcription factor, putative [Source:UniProtKB/TrEMBL;Acc:B8MW17]
CADAFLAG00000148	AFLA_073650	EQ963472	+	369115–370541		Mandelate racemase/muconate lactonizing enzyme family protein [Source:UniProtKB/TrEMBL;Acc:B8MW18]
CADAFLAG00000149	AFLA_073660	EQ963472	+	371069-372200	370965-372246	Alcohol dehydrogenase [Source:UniProtKB/TrEMBL;Acc:B8MW19]
CADAFLAG00000150	AFLA_073670	EQ963472	-	372235-373411	372235-373783	Putative uncharacterized protein [Source:UniProtKB/TrEMBL;Acc:B8MW20]
CADAFLAG00000151	AFLA_073680	EQ963472	+	374130-375550	373313-375763	Alcohol dehydrogenase, putative [Source:UniProtKB/TrEMBL;Acc:B8MW21]
CADAFLAG00000152	AFLA_073690	EQ963472	-	378077-379510	377634-380925	Putative uncharacterized protein [Source:UniProtKB/TrEMBL;Acc:B8MW22]
CADAFLAG00000153	AFLA_073700	EQ963472	-	381242–384700		Putative uncharacterized protein [Source:UniProtKB/TrEMBL;Acc:B8MW23]
CADAFLAG00000154	AFLA_073710	EQ963472	-	385587–387148		Mitochondrial ribosomal protein DAP3, putative [Source:UniProtKB/TrEMBL;Acc:B8MW24]
CADAFLAG00000155	AFLA_073720	EQ963472	+	387518-388258	387417-389440	Ribosome biogenesis protein (Rrs1), putative [Source:UniProtKB/TrEMBL;Acc:B8MW25]
CADAFLAG00000156	AFLA_073730	EQ963472	-	389346-391439	388161-393052	Rho GTPase activator (Bem2), putative [Source:UniProtKB/TrEMBL;Acc:B8MW26]
CADAFLAG00000157	AFLA_073740	EQ963472	+	394758–395811		Rab geranylgeranyltransferase, beta subunit [Source:UniProtKB/TrEMBL;Acc:B8MW27]
CADAFLAG00000158	AFLA_073750	EQ963472	+	396664–398475		Putative uncharacterized protein [Source:UniProtKB/TrEMBL;Acc:B8MW28]
CADAFLAG00000159	AFLA_073760	EQ963472	+	399440-404950	394422-405573	DNA mismatch repair protein Msh3 [Source:UniProtKB/TrEMBL;Acc:B8MW29]
CADAFLAG00000160	AFLA_073770	EQ963472	-	405476-408043	404854-409012	Putative uncharacterized protein [Source:UniProtKB/TrEMBL;Acc:B8MW30]
CADAFLAG00000161	AFLA_073780	EQ963472	-	409331-410787	409132-410787	Putative uncharacterized protein [Source:UniProtKB/TrEMBL;Acc:B8MW31]
CADAFLAG00000162	AFLA_073790	EQ963472	+	411598–412726		Alcohol dehydrogenase, zinc-containing [Source:UniProtKB/TrEMBL;Acc:B8MW32]
CADAFLAG00000163	AFLA_073800	EQ963472	+	413266–414390		Short chain dehydrogenase/reductase family [Source:UniProtKB/TrEMBL;Acc:B8MW33]
CADAFLAG00000164	AFLA_073810	EQ963472	-	414692–415741		Serine/threonine protein kinase, putative [Source:UniProtKB/TrEMBL;Acc:B8MW34]
CADAFLAG00000165	AFLA_073820	EQ963472	-	416344–416671		Putative uncharacterized protein [Source:UniProtKB/TrEMBL;Acc:B8MW35]
CADAFLAG00000166	AFLA_073830	EQ963472	+	417220–417522		Putative uncharacterized protein [Source:UniProtKB/TrEMBL;Acc:B8MW36]
CADAFLAG00000167	AFLA_073840	EQ963472	+	417853–421149		Na/K ATPase alpha 1 subunit, putative [Source:UniProtKB/TrEMBL;Acc:B8MW37]
CADAFLAG00000168	AFLA_073850	EQ963472	-	421958-424337	421051-424894	TBC domain protein, putative [Source:UniProtKB/TrEMBL;Acc:B8MW38]
CADAFLAG00000169	AFLA_073860	EQ963472	-	425919-428133	425245-430079	Telomerase reverse transcriptase, putative [Source:UniProtKB/TrEMBL;Acc:B8MW39]
CADAFLAG00000170	AFLA_073870	EQ963472	+	430897–433638		C6 transcription factor RegA, putative [Source:UniProtKB/TrEMBL;Acc:B8MW40]
CADAFLAG00000171	AFLA_073880	EQ963472	-	433760–434709		Short chain dehydrogenase, putative [Source:UniProtKB/TrEMBL;Acc:B8MW41]
CADAFLAG00000172	AFLA_073890	EQ963472	+	434987–435535		Putative uncharacterized protein [Source:UniProtKB/TrEMBL;Acc:B8MW42]
CADAFLAG00000173	AFLA_073900	EQ963472	+	436028–437555		Histidinol dehydrogenase [Source:UniProtKB/TrEMBL;Acc:B8MW43]
CADAFLAG00000174	AFLA_073910	EQ963472	+	438012–440370		Salicylate hydroxylase, putative [Source:UniProtKB/TrEMBL;Acc:B8MW44]
CADAFLAG00000175	AFLA_073920	EQ963472	-	441207-442037	441014-442198	Short chain dehydrogenase, putative [Source:UniProtKB/TrEMBL;Acc:B8MW45]
CADAFLAG00000176	AFLA_073930	EQ963472	+	444492-446127	444252-446800	MFS transporter, putative [Source:UniProtKB/TrEMBL;Acc:B8MW46]
CADAFLAG00000177	AFLA_073940	EQ963472	-	446703-447993	446525-448349	Ulp1 protease family protein [Source:UniProtKB/TrEMBL;Acc:B8MW47]
CADAFLAG00000178	AFLA_073950	EQ963472	-	448976-454784	448447-455658	Rho guanyl nucleotide exchange factor, putative [Source:UniProtKB/TrEMBL;Acc:B8MW48]
CADAFLAG00000179	AFLA_073960	EQ963472	+	463832-464779	463349-465705	Putative uncharacterized protein [Source:UniProtKB/TrEMBL;Acc:B8MW49]
CADAFLAG00000180	AFLA_073970	EQ963472	-	466093–466937		Putative uncharacterized protein [Source:UniProtKB/TrEMBL;Acc:B8MW50]
CADAFLAG00000181	AFLA_073980	EQ963472	-	469735-471375	468976-472164	Cyclin-dependent protein kinase complex component, putative [Source:UniProtKB/TrEMBL;Acc:B8MW51]
CADAFLAG00000182	AFLA_073990	EQ963472	-	472977-473916	472977-474465	Proteasome subunit beta type [Source:UniProtKB/TrEMBL;Acc:B8MW52]
CADAFLAG00000183	AFLA_074000	EQ963472	+	474436-475568	473712-476591	BEM46 family protein [Source:UniProtKB/TrEMBL;Acc:B8MW53]
CADAFLAG00000184	AFLA_074010	EQ963472	-	476496-477585	475484-477716	F1F0 ATP synthase assembly protein Atp11, putative [Source:UniProtKB/TrEMBL;Acc:B8MW54]
CADAFLAG00000185	AFLA_074020	EQ963472	-	478970-480374	478899-480624	Putative uncharacterized protein [Source:UniProtKB/TrEMBL;Acc:B8MW55]
CADAFLAG00000186	AFLA_074030	EQ963472	+	481040-481555	480729-482945	Putative uncharacterized protein [Source:UniProtKB/TrEMBL;Acc:B8MW56]
CADAFLAG00000187	AFLA_074040	EQ963472	+	483697-484677	483465-492741	FAD dependent sulfhydryl oxidase Erv2, putative [Source:UniProtKB/TrEMBL;Acc:B8MW57]
CADAFLAG00000188	AFLA_074050	EQ963472	+	486869–488242		Putative uncharacterized protein [Source:UniProtKB/TrEMBL;Acc:B8MW58]
CADAFLAG00000189	AFLA_074060	EQ963472	+	490886–492741		NF-X1 finger transcription factor, putative [Source:UniProtKB/TrEMBL;Acc:B8MW59]
CADAFLAG00000190	AFLA_074070	EQ963472	+	496318-498266	496045-498266	Siderochrome-iron transporter, putative [Source:UniProtKB/TrEMBL;Acc:B8MW60]
CADAFLAG00000191	AFLA_074080	EQ963472	+	498998–501461		Alpha-1,2-mannosidase, putative [Source:UniProtKB/TrEMBL;Acc:B8MW61]
CADAFLAG00000192	AFLA_074090	EQ963472	+	502479–503535		Putative uncharacterized protein [Source:UniProtKB/TrEMBL;Acc:B8MW62]
CADAFLAG00000193	AFLA_074100	EQ963472	+	504344-506427	498998-514334	Gamma-glutamyltranspeptidase [Source:UniProtKB/TrEMBL;Acc:B8MW63]
CADAFLAG00000194	AFLA_074110	EQ963472	+	507474–509120		Pre-mRNA splicing factor, putative [Source:UniProtKB/TrEMBL;Acc:B8MW64]
CADAFLAG00000195	AFLA_074120	EQ963472	+	509622-510310	507002-514334	Pre-mRNA splicing factor, putative [Source:UniProtKB/TrEMBL;Acc:B8MW65]
CADAFLAG00000196	AFLA_074130	EQ963472	+	511360–513933		Putative uncharacterized protein [Source:UniProtKB/TrEMBL;Acc:B8MW66]
CADAFLAG00000197	AFLA_074140	EQ963472	-	515935-516406	515058-518366	Putative uncharacterized protein [Source:UniProtKB/TrEMBL;Acc:B8MW67]
CADAFLAG00000198	AFLA_074150	EQ963472	+	520498-521885	518641-522451	Putative uncharacterized protein [Source:UniProtKB/TrEMBL;Acc:B8MW68]
CADAFLAG00000199	AFLA_074160	EQ963472	-	523519–524685		Putative uncharacterized protein [Source:UniProtKB/TrEMBL;Acc:B8MW69]
CADAFLAG00000200	AFLA_074170	EQ963472	+	525580–527154		Cytochrome P450, putative [Source:UniProtKB/TrEMBL;Acc:B8MW70]
CADAFLAG00000201	AFLA_074180	EQ963472	+	527781-530089	524902-530267	C6 finger domain protein, putative [Source:UniProtKB/TrEMBL;Acc:B8MW71]
CADAFLAG00000202	AFLA_074190	EQ963472	+	532055–535669		Putative uncharacterized protein [Source:UniProtKB/TrEMBL;Acc:B8MW72]
CADAFLAG00000203	AFLA_074200	EQ963472	+	535826-537146	532055-537730	C6 transcription factor, putative [Source:UniProtKB/TrEMBL;Acc:B8MW73]
CADAFLAG00000204	AFLA_074210	EQ963472	-	538074–538890		Putative uncharacterized protein [Source:UniProtKB/TrEMBL;Acc:B8MW74]
CADAFLAG00000205	AFLA_074220	EQ963472	-	540734-544070	539910-544227	Ubiquitin conjugating enzyme, putative [Source:UniProtKB/TrEMBL;Acc:B8MW75]
CADAFLAG00000206	AFLA_074230	EQ963472	+	544865-547127	544673-548220	Putative uncharacterized protein [Source:UniProtKB/TrEMBL;Acc:B8MW76]
CADAFLAG00000207	AFLA_074240	EQ963472	-	547807-548143	547035-548220	Putative uncharacterized protein [Source:UniProtKB/TrEMBL;Acc:B8MW77]
CADAFLAG00000208	AFLA_074250	EQ963472	+	550033–551673		Probable endopolygalacturonase D [Source:UniProtKB/Swiss-Prot;Acc:B8MW78]
CADAFLAG00000209	AFLA_074260	EQ963472	-	551949-552644	551586-552676	Putative uncharacterized protein [Source:UniProtKB/TrEMBL;Acc:B8MW79]
CADAFLAG00000210	AFLA_074270	EQ963472	-	553040-554900	553040-555121	Sugar transporter, putative [Source:UniProtKB/TrEMBL;Acc:B8MW80]
CADAFLAG00000211	AFLA_074280	EQ963472	-	556007-556909	555900-557498	Putative uncharacterized protein [Source:UniProtKB/TrEMBL;Acc:B8MW81]
CADAFLAG00000212	AFLA_074290	EQ963472	-	556956–557327		Putative uncharacterized protein [Source:UniProtKB/TrEMBL;Acc:B8MW82]
CADAFLAG00000213	AFLA_074300	EQ963472	-	559480–559834		Putative uncharacterized protein [Source:UniProtKB/TrEMBL;Acc:B8MW83]
CADAFLAG00000214	AFLA_074310	EQ963472	-	561605–561947		Putative uncharacterized protein [Source:UniProtKB/TrEMBL;Acc:B8MW84]
CADAFLAG00000215	AFLA_074320	EQ963472	-	562843–563253		Putative uncharacterized protein [Source:UniProtKB/TrEMBL;Acc:B8MW85]
CADAFLAG00000216	AFLA_074330	EQ963472	+	564030-565523	564030-566083	CDK4/6, putative [Source:UniProtKB/TrEMBL;Acc:B8MW86]
CADAFLAG00000217	AFLA_074340	EQ963472	+	566472–567263		Putative uncharacterized protein [Source:UniProtKB/TrEMBL;Acc:B8MWH7]
CADAFLAG00000218	AFLA_074350	EQ963472	+	568047-569057	566264-569122	Oxidoreductase, putative [Source:UniProtKB/TrEMBL;Acc:B8MWH8]
CADAFLAG00000219	AFLA_074360	EQ963472	-	569719–570483		Streptomycin 3''-adenylyltransferase, putative [Source:UniProtKB/TrEMBL;Acc:B8MWH9]
CADAFLAG00000220	AFLA_074370	EQ963472	+	570803–571704		Putative uncharacterized protein [Source:UniProtKB/TrEMBL;Acc:B8MWI0]
CADAFLAG00000221	AFLA_074380	EQ963472	-	571785-573389	571635-573471	Salicylate hydroxylase, putative [Source:UniProtKB/TrEMBL;Acc:B8MWI1]
CADAFLAG00000222	AFLA_074390	EQ963472	-	573926–574853		Putative uncharacterized protein [Source:UniProtKB/TrEMBL;Acc:B8MWI2]
CADAFLAG00000223	AFLA_074400	EQ963472	-	576550–578716		Putative uncharacterized protein [Source:UniProtKB/TrEMBL;Acc:B8MWI3]
CADAFLAG00000224	AFLA_074410	EQ963472	+	578975–580031		Dihydrodipicolinate synthase, putative [Source:UniProtKB/TrEMBL;Acc:B8MWI4]
CADAFLAG00000225	AFLA_074420	EQ963472	-	580308-581306	580021-581518	Putative uncharacterized protein [Source:UniProtKB/TrEMBL;Acc:B8MWI5]
CADAFLAG00000226	AFLA_074430	EQ963472	+	582004-583825	581872-583921	Sugar transporter, putative [Source:UniProtKB/TrEMBL;Acc:B8MWI6]
CADAFLAG00000227	AFLA_074440	EQ963472	+	584427–584688		Putative uncharacterized protein [Source:UniProtKB/TrEMBL;Acc:B8MWI7]
CADAFLAG00000228	AFLA_074450	EQ963472	+	586126-587222	586065-587704	Aldo-keto reductase, putative [Source:UniProtKB/TrEMBL;Acc:B8MWI8]
CADAFLAG00000229	AFLA_074460	EQ963472	-	588081-588599	587791-588737	Putative uncharacterized protein [Source:UniProtKB/TrEMBL;Acc:B8MWI9]
CADAFLAG00000230	AFLA_074470	EQ963472	-	591591–592499		Nuclear division Rft1 protein, putative [Source:UniProtKB/TrEMBL;Acc:B8MWJ0]
CADAFLAG00000231	AFLA_074480	EQ963472	-	594775–595281		Putative uncharacterized protein [Source:UniProtKB/TrEMBL;Acc:B8MWJ1]
CADAFLAG00000232	AFLA_074490	EQ963472	+	598578–599315		Decarboxylase DEC1, putative [Source:UniProtKB/TrEMBL;Acc:B8MWJ2]
CADAFLAG00000233	AFLA_074500	EQ963472	-	600242–604069		Short chain type dehydrogenase, putative [Source:UniProtKB/TrEMBL;Acc:B8MWJ3]
CADAFLAG00000234	AFLA_074510	EQ963472	+	605049–605768		Short chain dehydrogenase family protein, putative [Source:UniProtKB/TrEMBL;Acc:B8MWJ4]
CADAFLAG00000235	AFLA_074520	EQ963472	-	606110–607714		Probable alpha-galactosidase A [Source:UniProtKB/Swiss-Prot;Acc:B8MWJ5]
CADAFLAG00000236	AFLA_074530	EQ963472	-	610313–611896		Putative uncharacterized protein [Source:UniProtKB/TrEMBL;Acc:B8MWJ6]
CADAFLAG00000237	AFLA_074540	EQ963472	+	614155-615959	613933-616217	Cytochrome P450, putative [Source:UniProtKB/TrEMBL;Acc:B8MWJ7]
CADAFLAG00000238	AFLA_074560	EQ963472	-	616462–618121		Cytochrome P450, putative [Source:UniProtKB/TrEMBL;Acc:B8MWJ8]
CADAFLAG00000239	AFLA_074570	EQ963472	+	619728-621495	619269-621604	Efflux pump antibiotic resistance protein, putative [Source:UniProtKB/TrEMBL;Acc:B8MWJ9]
CADAFLAG00000240	AFLA_074580	EQ963472	+	622298–623273		Short-chain dehydrogenases/reductase, putative [Source:UniProtKB/TrEMBL;Acc:B8MWK0]
CADAFLAG00000241	AFLA_074590	EQ963472	-	624030-624922	623845-624958	Putative uncharacterized protein [Source:UniProtKB/TrEMBL;Acc:B8MWK1]
CADAFLAG00000242	AFLA_074600	EQ963472	+	626012–626503		Putative uncharacterized protein [Source:UniProtKB/TrEMBL;Acc:B8MWK2]
CADAFLAG00000243	AFLA_074610	EQ963472	-	629234-630900	629234-631120	MFS transporter, putative [Source:UniProtKB/TrEMBL;Acc:B8MWK3]
CADAFLAG00000244	AFLA_074620	EQ963472	-	632563–634482		Sodium/phosphate symporter, putative [Source:UniProtKB/TrEMBL;Acc:B8MWK4]
CADAFLAG00000245	AFLA_074630	EQ963472	+	639201-641100	638092-641109	MFS nicotinic acid transporter Tna1, putative [Source:UniProtKB/TrEMBL;Acc:B8MWK5]
CADAFLAG00000246	AFLA_074640	EQ963472	-	644667-645189	644489-645189	Putative uncharacterized protein [Source:UniProtKB/TrEMBL;Acc:B8MWK6]
CADAFLAG00000247	AFLA_074650	EQ963472	-	646961–647538		Putative uncharacterized protein [Source:UniProtKB/TrEMBL;Acc:B8MWK7]
CADAFLAG00000248	AFLA_074660	EQ963472	-	650610–652385		Putative uncharacterized protein [Source:UniProtKB/TrEMBL;Acc:B8MWK8]
CADAFLAG00000249	AFLA_074670	EQ963472	-	652885–653295		Putative uncharacterized protein [Source:UniProtKB/TrEMBL;Acc:B8MWK9]
CADAFLAG00000250	AFLA_074680	EQ963472	-	653322-653712	652885-653712	Putative uncharacterized protein [Source:UniProtKB/TrEMBL;Acc:B8MWL0]
CADAFLAG00000251	AFLA_074690	EQ963472	+	654603–655299		Quinone oxidoreductase, putative [Source:UniProtKB/TrEMBL;Acc:B8MWL1]
CADAFLAG00000252	AFLA_074700	EQ963472	-	657642-660160	656538-660162	Putative uncharacterized protein [Source:UniProtKB/TrEMBL;Acc:B8MWL2]
CADAFLAG00000253	AFLA_074710	EQ963472	-	660711-661583	660608-662108	3,2-trans-enoyl-CoA isomerase, putative [Source:UniProtKB/TrEMBL;Acc:B8MWL3]
CADAFLAG00000254	AFLA_074720	EQ963472	+	662062-662826	661503-662826	Putative uncharacterized protein [Source:UniProtKB/TrEMBL;Acc:B8MWL4]
CADAFLAG00000255	AFLA_074730	EQ963472	-	663024–664851		Putative uncharacterized protein [Source:UniProtKB/TrEMBL;Acc:B8MWL5]
CADAFLAG00000256	AFLA_074740	EQ963472	+	666123–667216		Putative uncharacterized protein [Source:UniProtKB/TrEMBL;Acc:B8MWL6]
CADAFLAG00000257	AFLA_074750	EQ963472	+	668813–669353		Putative uncharacterized protein [Source:UniProtKB/TrEMBL;Acc:B8MWL7]
CADAFLAG00000258	AFLA_074760	EQ963472	-	671166-672466	671166-673070	Alkyl/aryl-sulfatase BDS1, putative [Source:UniProtKB/TrEMBL;Acc:B8MWL8]
CADAFLAG00000259	AFLA_074770	EQ963472	-	672530–673070		Putative uncharacterized protein [Source:UniProtKB/TrEMBL;Acc:B8MWL9]
CADAFLAG00000260	AFLA_074780	EQ963472	+	674223-674724	673222-675651	Putative uncharacterized protein [Source:UniProtKB/TrEMBL;Acc:B8MWM0]
CADAFLAG00000261	AFLA_074790	EQ963472	-	675167–676370		Putative uncharacterized protein [Source:UniProtKB/TrEMBL;Acc:B8MWM1]
CADAFLAG00000262	AFLA_074800	EQ963472	+	679302-680509	679196-680615	Integral membrane protein [Source:UniProtKB/TrEMBL;Acc:B8MWM2]
CADAFLAG00000263	AFLA_074810	EQ963472	+	682078–682695		Putative uncharacterized protein [Source:UniProtKB/TrEMBL;Acc:B8MWM3]
CADAFLAG00000264	AFLA_074820	EQ963472	-	683512-685717	683353-685717	Putative uncharacterized protein [Source:UniProtKB/TrEMBL;Acc:B8MWM4]
CADAFLAG00000265	AFLA_074830	EQ963472	-	686377–687178		Putative uncharacterized protein [Source:UniProtKB/TrEMBL;Acc:B8MWM5]
CADAFLAG00000266	AFLA_074840	EQ963472	-	688734–690668		Amino acid transporter, putative [Source:UniProtKB/TrEMBL;Acc:B8MWM6]
CADAFLAG00000267	AFLA_074850	EQ963472	+	691710-692153	690831-695361	Putative uncharacterized protein [Source:UniProtKB/TrEMBL;Acc:B8MWM7]
CADAFLAG00000268	AFLA_074860	EQ963472	+	693453–694109		Putative uncharacterized protein [Source:UniProtKB/TrEMBL;Acc:B8MWM8]
CADAFLAG00000269	AFLA_074870	EQ963472	-	695276-697186	693898-697418	Putative uncharacterized protein [Source:UniProtKB/TrEMBL;Acc:B8MWM9]
CADAFLAG00000270	AFLA_074880	EQ963472	+	698588–699027		Putative uncharacterized protein [Source:UniProtKB/TrEMBL;Acc:B8MWN0]
CADAFLAG00000271	AFLA_074890	EQ963472	-	699405-701062	699334-701062	Thiamin pyrophosphokinase, putative [Source:UniProtKB/TrEMBL;Acc:B8MWN1]
CADAFLAG00000272	AFLA_074900	EQ963472	+	701539–701883		Putative uncharacterized protein [Source:UniProtKB/TrEMBL;Acc:B8MWN2]
CADAFLAG00000273	AFLA_074910	EQ963472	+	704856-707235	704509-707235	Putative uncharacterized protein [Source:UniProtKB/TrEMBL;Acc:B8MWN3]
CADAFLAG00000274	AFLA_074920	EQ963472	+	707614–708214		Putative uncharacterized protein [Source:UniProtKB/TrEMBL;Acc:B8MWN4]
CADAFLAG00000275	AFLA_074930	EQ963472	-	708653–709468		Putative uncharacterized protein [Source:UniProtKB/TrEMBL;Acc:B8MWN5]
CADAFLAG00000276	AFLA_074940	EQ963472	+	712223-714799	712014-715073	Viral-enhancing factor, putative [Source:UniProtKB/TrEMBL;Acc:B8MWN6]
CADAFLAG00000277	AFLA_074950	EQ963472	-	714855–715539		Putative uncharacterized protein [Source:UniProtKB/TrEMBL;Acc:B8MWN7]
CADAFLAG00000278	AFLA_074960	EQ963472	+	718725–719000		Putative uncharacterized protein [Source:UniProtKB/TrEMBL;Acc:B8MWN8]
CADAFLAG00000279	AFLA_074970	EQ963472	+	719497–723583		Helicase, putative [Source:UniProtKB/TrEMBL;Acc:B8MWN9]
CADAFLAG00000280	AFLA_074980	EQ963472	-	723570-725688	723479-725942	Splicing factor u2af large subunit [Source:UniProtKB/TrEMBL;Acc:B8MWP0]
CADAFLAG00000281	AFLA_074990	EQ963472	+	726116-727538	726085-728551	DNA N-glycosylase, putative [Source:UniProtKB/TrEMBL;Acc:B8MWP1]
CADAFLAG00000282	AFLA_075000	EQ963472	-	731151-732859	727771-733626	Putative uncharacterized protein [Source:UniProtKB/TrEMBL;Acc:B8MWP2]
CADAFLAG00000283	AFLA_075010	EQ963472	-	736546–736893		Putative uncharacterized protein [Source:UniProtKB/TrEMBL;Acc:B8MWP3]
CADAFLAG00000284	AFLA_075020	EQ963472	+	737757-738367	736890-738367	Putative uncharacterized protein [Source:UniProtKB/TrEMBL;Acc:B8MWP4]
CADAFLAG00000285	AFLA_075030	EQ963472	+	738629-739374	738485-739532	40S ribosomal protein S13 [Source:UniProtKB/TrEMBL;Acc:B8MWP5]
CADAFLAG00000286	AFLA_075040	EQ963472	-	739749-742305	736546-742359	Putative uncharacterized protein [Source:UniProtKB/TrEMBL;Acc:B8MWP6]
CADAFLAG00000287	AFLA_075050	EQ963472	+	743047-743376	742529-744827	COMPASS complex subunit Sdc1, putative [Source:UniProtKB/TrEMBL;Acc:B8MWP7]
CADAFLAG00000288	AFLA_075060	EQ963472	-	747042-748207	745907-748517	Transformer-SR ribonucleoprotein, putative [Source:UniProtKB/TrEMBL;Acc:B8MWP8]
CADAFLAG00000289	AFLA_075070	EQ963472	-	749055–752661		PHD finger domain protein, putative [Source:UniProtKB/TrEMBL;Acc:B8MWP9]
CADAFLAG00000290	AFLA_075080	EQ963472	+	753080–754123		Putative uncharacterized protein [Source:UniProtKB/TrEMBL;Acc:B8MWQ0]
CADAFLAG00000291	AFLA_075090	EQ963472	-	754253–755696		O-sialoglycoprotein endopeptidase, putative [Source:UniProtKB/TrEMBL;Acc:B8MWQ1]
CADAFLAG00000292	AFLA_075100	EQ963472	-	756327-756710	756327-757162	Putative uncharacterized protein [Source:UniProtKB/TrEMBL;Acc:B8MWQ2]
CADAFLAG00000293	AFLA_075110	EQ963472	+	758800-759420	758646-760530	Putative uncharacterized protein [Source:UniProtKB/TrEMBL;Acc:B8MWQ3]
CADAFLAG00000294	AFLA_075120	EQ963472	+	762647–765595		Mitochondrial carrier protein, putative [Source:UniProtKB/TrEMBL;Acc:B8MWQ4]
CADAFLAG00000295	AFLA_075130	EQ963472	-	766018-766712	765518-766758	Putative uncharacterized protein [Source:UniProtKB/TrEMBL;Acc:B8MWQ5]
CADAFLAG00000296	AFLA_075140	EQ963472	+	767014–773320		Separin, putative [Source:UniProtKB/TrEMBL;Acc:B8MWQ6]
CADAFLAG00000297	AFLA_075150	EQ963472	+	773749-774775	773575-775990	Esterase, putative [Source:UniProtKB/TrEMBL;Acc:B8MWQ7]
CADAFLAG00000298	AFLA_075160	EQ963472	-	775328-775564	774825-775827	Putative uncharacterized protein [Source:UniProtKB/TrEMBL;Acc:B8MWQ8]
CADAFLAG00000299	AFLA_075170	EQ963472	-	776559–778865		Alkaline phosphatase, putative [Source:UniProtKB/TrEMBL;Acc:B8MWQ9]
CADAFLAG00000300	AFLA_075180	EQ963472	-	780366-782255	780321-784055	MFS transporter, putative [Source:UniProtKB/TrEMBL;Acc:B8MWR0]
CADAFLAG00000301	AFLA_075190	EQ963472	-	783022–783645		Putative uncharacterized protein [Source:UniProtKB/TrEMBL;Acc:B8MWR1]
CADAFLAG00000302	AFLA_075200	EQ963472	+	784574-785663	784364-785663	Putative uncharacterized protein [Source:UniProtKB/TrEMBL;Acc:B8MWR2]
CADAFLAG00000303	AFLA_075210	EQ963472	-	786078–787471		Putative uncharacterized protein [Source:UniProtKB/TrEMBL;Acc:B8MWR3]
CADAFLAG00000304	AFLA_075220	EQ963472	-	791552–791884		Putative uncharacterized protein [Source:UniProtKB/TrEMBL;Acc:B8MWR4]
CADAFLAG00000305	AFLA_075230	EQ963472	+	793654-794676	793615-794766	Chromatin regulatory protein sir2, putative [Source:UniProtKB/TrEMBL;Acc:B8MWR5]
CADAFLAG00000306	AFLA_075240	EQ963472	+	795552–796037		Putative uncharacterized protein [Source:UniProtKB/TrEMBL;Acc:B8MWR6]
CADAFLAG00000307	AFLA_075250	EQ963472	+	797282–798064		C-4 methyl sterol oxidase, putative [Source:UniProtKB/TrEMBL;Acc:B8MWT8]
CADAFLAG00000308	AFLA_075260	EQ963472	-	799547–800492		Sugar transporter, putative [Source:UniProtKB/TrEMBL;Acc:B8MWT9]
CADAFLAG00000309	AFLA_075270	EQ963472	-	801296–802389		Fumarylacetoacetate hydrolase family protein [Source:UniProtKB/TrEMBL;Acc:B8MWU0]
CADAFLAG00000310	AFLA_075280	EQ963472	+	802584-804348	802584-804406	Lignostilbene dioxygenase, putative [Source:UniProtKB/TrEMBL;Acc:B8MWU1]
CADAFLAG00000311	AFLA_075290	EQ963472	-	805156-806761	805008-806824	Aldehyde dehydrogenase, putative [Source:UniProtKB/TrEMBL;Acc:B8MWU2]
CADAFLAG00000312	AFLA_075300	EQ963472	-	807765-809343	807674-809497	Salicylate hydroxylase, putative [Source:UniProtKB/TrEMBL;Acc:B8MWU3]
CADAFLAG00000313	AFLA_075310	EQ963472	+	809796–810907		Gentisate 1,2-dioxygenase, putative [Source:UniProtKB/TrEMBL;Acc:B8MWU4]
CADAFLAG00000314	AFLA_075320	EQ963472	+	811563-812793	809795-813958	C6 transcription factor, putative [Source:UniProtKB/TrEMBL;Acc:B8MWU5]
CADAFLAG00000315	AFLA_075330	EQ963472	+	812820–813650		Putative uncharacterized protein [Source:UniProtKB/TrEMBL;Acc:B8MWU6]
CADAFLAG00000316	AFLA_075340	EQ963472	+	815288-817021	815245-817129	Putative uncharacterized protein [Source:UniProtKB/TrEMBL;Acc:B8MWU7]
CADAFLAG00000317	AFLA_075350	EQ963472	-	817388–817777		Putative uncharacterized protein [Source:UniProtKB/TrEMBL;Acc:B8MWU8]
CADAFLAG00000318	AFLA_075360	EQ963472	+	819168-819935	818993-820299	Putative uncharacterized protein [Source:UniProtKB/TrEMBL;Acc:B8MWU9]
CADAFLAG00000319	AFLA_075370	EQ963472	+	821613–823336		FAD binding domain protein [Source:UniProtKB/TrEMBL;Acc:B8MWV0]
CADAFLAG00000320	AFLA_075380	EQ963472	+	824576–825691		Putative uncharacterized protein [Source:UniProtKB/TrEMBL;Acc:B8MWV1]
CADAFLAG00000321	AFLA_075390	EQ963472	-	826431-827514	826214-827855	3-methyl-2-oxobutanoate hydroxymethyltransferase, putative [Source:UniProtKB/TrEMBL;Acc:B8MWV2]
CADAFLAG00000322	AFLA_075400	EQ963472	-	828204–829424		Quinone oxidoreductase, putative [Source:UniProtKB/TrEMBL;Acc:B8MWV3]
CADAFLAG00000323	AFLA_075410	EQ963472	-	830291-831819	829926-832171	Monocarboxylate permease homolog, mch4, putative [Source:UniProtKB/TrEMBL;Acc:B8MWV4]
CADAFLAG00000324	AFLA_075420	EQ963472	+	832676-834646	832636-835160	Homeobox protein meis, putative [Source:UniProtKB/TrEMBL;Acc:B8MWV5]
CADAFLAG00000325	AFLA_075430	EQ963472	-	835066-836685	834548-837009	DEAD box ATP-dependent RNA helicase, putative [Source:UniProtKB/TrEMBL;Acc:B8MWV6]
CADAFLAG00000326	AFLA_075440	EQ963472	+	840625-841240	840625-841637	Putative uncharacterized protein [Source:UniProtKB/TrEMBL;Acc:B8MWV7]
CADAFLAG00000327	AFLA_075450	EQ963472	+	842212-843741	842212-843807	UMTA methyltransferase family protein [Source:UniProtKB/TrEMBL;Acc:B8MWV8]
CADAFLAG00000328	AFLA_075460	EQ963472	-	844241–845557		Putative uncharacterized protein [Source:UniProtKB/TrEMBL;Acc:B8MWV9]
CADAFLAG00000329	AFLA_075470	EQ963472	+	847765-850020	847427-850118	Putative uncharacterized protein [Source:UniProtKB/TrEMBL;Acc:B8MWW0]
CADAFLAG00000330	AFLA_075480	EQ963472	-	852839–854835		Putative uncharacterized protein [Source:UniProtKB/TrEMBL;Acc:B8MWW1]
CADAFLAG00000331	AFLA_075490	EQ963472	+	856662-858041	856662-858742	Putative uncharacterized protein [Source:UniProtKB/TrEMBL;Acc:B8MWW2]
CADAFLAG00000332	AFLA_075500	EQ963472	-	861715–863055		Putative uncharacterized protein [Source:UniProtKB/TrEMBL;Acc:B8MWW3]
CADAFLAG00000333	AFLA_075510	EQ963472	+	863574-865310	863430-865457	General amidase, putative [Source:UniProtKB/TrEMBL;Acc:B8MWW4]
CADAFLAG00000334	AFLA_075520	EQ963472	-	865369-866535	865234-866782	Putative uncharacterized protein [Source:UniProtKB/TrEMBL;Acc:B8MWW5]
CADAFLAG00000335	AFLA_075530	EQ963472	+	867558–868088		Putative uncharacterized protein [Source:UniProtKB/TrEMBL;Acc:B8MWW6]
CADAFLAG00000336	AFLA_075540	EQ963472	-	868369-869985	868253-870028	MFS monosaccharide transporter, putative [Source:UniProtKB/TrEMBL;Acc:B8MWW7]
CADAFLAG00000337	AFLA_075550	EQ963472	-	870666–872735		Putative uncharacterized protein [Source:UniProtKB/TrEMBL;Acc:B8MWW8]
CADAFLAG00000338	AFLA_075560	EQ963472	+	873162-876030	873156-876030	Putative uncharacterized protein [Source:UniProtKB/TrEMBL;Acc:B8MWW9]
CADAFLAG00000339	AFLA_075570	EQ963472	+	876574–878019		Glucuronyl hydrolase, putative [Source:UniProtKB/TrEMBL;Acc:B8MWX0]
CADAFLAG00000340	AFLA_075580	EQ963472	+	879987-881453	879987-881934	Putative uncharacterized protein [Source:UniProtKB/TrEMBL;Acc:B8MWX1]
CADAFLAG00000341	AFLA_075590	EQ963472	-	881838–882242		Putative uncharacterized protein [Source:UniProtKB/TrEMBL;Acc:B8MWX2]
CADAFLAG00000342	AFLA_075600	EQ963472	+	883663-884007	883663-887149	Putative uncharacterized protein [Source:UniProtKB/TrEMBL;Acc:B8MWX3]
CADAFLAG00000343	AFLA_075610	EQ963472	+	884731–885123		Putative uncharacterized protein [Source:UniProtKB/TrEMBL;Acc:B8MWX4]
CADAFLAG00000344	AFLA_075620	EQ963472	+	885593–886582		Putative uncharacterized protein [Source:UniProtKB/TrEMBL;Acc:B8MWX5]
CADAFLAG00000345	AFLA_075630	EQ963472	-	887054-887953	886861-887953	Putative uncharacterized protein [Source:UniProtKB/TrEMBL;Acc:B8MWX6]
CADAFLAG00000346	AFLA_075640	EQ963472	-	889172-890688	889011-890817	Pigment biosynthesis protein Ayg1 [Source:UniProtKB/TrEMBL;Acc:B8MWX7]
CADAFLAG00000347	AFLA_075650	EQ963472	+	892358–892783		Putative uncharacterized protein [Source:UniProtKB/TrEMBL;Acc:B8MWX8]
CADAFLAG00000348	AFLA_075660	EQ963472	-	893093-895032	892880-895116	Putative uncharacterized protein [Source:UniProtKB/TrEMBL;Acc:B8MWX9]
CADAFLAG00000349	AFLA_075670	EQ963472	+	897683-899242	897379-899253	Monoxygenase, putative [Source:UniProtKB/TrEMBL;Acc:B8MWY0]
CADAFLAG00000350	AFLA_075680	EQ963472	-	899760-901450	899494-903875	Putative uncharacterized protein [Source:UniProtKB/TrEMBL;Acc:B8MWY1]
CADAFLAG00000351	AFLA_075690	EQ963472	-	901607–903787		Periplasmic beta-glucosidase, putative [Source:UniProtKB/TrEMBL;Acc:B8MWY2]
CADAFLAG00000352	AFLA_075700	EQ963472	-	905108–905662		Putative uncharacterized protein [Source:UniProtKB/TrEMBL;Acc:B8MWY3]
CADAFLAG00000353	AFLA_075710	EQ963472	-	905864–906462		D-aminoacylase, putative [Source:UniProtKB/TrEMBL;Acc:B8MWY4]
CADAFLAG00000354	AFLA_075720	EQ963472	-	907303–908124		Short chain type dehydrogenase, putative [Source:UniProtKB/TrEMBL;Acc:B8MWY5]
CADAFLAG00000355	AFLA_075730	EQ963472	-	909669-910719	909669-910868	Short chain dehydrogenase/reductase, putative [Source:UniProtKB/TrEMBL;Acc:B8MWY6]
CADAFLAG00000356	AFLA_075740	EQ963472	+	911602-912769	910621-913936	Vitamin H transporter, putative [Source:UniProtKB/TrEMBL;Acc:B8MWY7]
CADAFLAG00000357	AFLA_075750	EQ963472	+	912822–913556		Putative uncharacterized protein [Source:UniProtKB/TrEMBL;Acc:B8MWY8]
CADAFLAG00000358	AFLA_075760	EQ963472	-	913898–916242		Putative uncharacterized protein [Source:UniProtKB/TrEMBL;Acc:B8MWY9]
CADAFLAG00000359	AFLA_075770	EQ963472	+	916641–917396		Dienelactone hydrolase family protein [Source:UniProtKB/TrEMBL;Acc:B8MWZ0]
CADAFLAG00000360	AFLA_075780	EQ963472	-	919215-919985	918751-920721	Putative uncharacterized protein [Source:UniProtKB/TrEMBL;Acc:B8MWZ1]
CADAFLAG00000361	AFLA_075800	EQ963472	+	921859–923760		Putative uncharacterized protein [Source:UniProtKB/TrEMBL;Acc:B8MWZ2]
CADAFLAG00000362	AFLA_075790	EQ963472	-	924587–924973		Integral membrane protein [Source:UniProtKB/TrEMBL;Acc:B8MWZ3]
CADAFLAG00000363	AFLA_075810	EQ963472	-	929300–930013		Efflux pump antibiotic resistance protein, putative [Source:UniProtKB/TrEMBL;Acc:B8MWZ4]
CADAFLAG00000364	AFLA_075820	EQ963472	+	931152–931856		Methyltransferase, putative [Source:UniProtKB/TrEMBL;Acc:B8MWZ5]
CADAFLAG00000365	AFLA_075830	EQ963472	-	932507–933768		Dimethyladenosine transferase [Source:UniProtKB/TrEMBL;Acc:B8MWZ6]
CADAFLAG00000366	AFLA_075840	EQ963472	-	935340–937168		Hyaluronan synthase, putative [Source:UniProtKB/TrEMBL;Acc:B8MWZ7]
CADAFLAG00000367	AFLA_075850	EQ963472	+	938095–939633		Putative uncharacterized protein [Source:UniProtKB/TrEMBL;Acc:B8MWZ8]
CADAFLAG00000368	AFLA_075860	EQ963472	-	941006-943257	940684-945273	Putative uncharacterized protein [Source:UniProtKB/TrEMBL;Acc:B8MWZ9]
CADAFLAG00000369	AFLA_075870	EQ963472	+	944409-945032	943916-947609	Putative uncharacterized protein [Source:UniProtKB/TrEMBL;Acc:B8MX00]
CADAFLAG00000370	AFLA_075880	EQ963472	+	945715–947324		Putative uncharacterized protein [Source:UniProtKB/TrEMBL;Acc:B8MX01]
CADAFLAG00000371	AFLA_075890	EQ963472	-	947577–948338		Putative uncharacterized protein [Source:UniProtKB/TrEMBL;Acc:B8MX02]
CADAFLAG00000372	AFLA_075900	EQ963472	+	949279–950490		Putative uncharacterized protein [Source:UniProtKB/TrEMBL;Acc:B8MX03]
CADAFLAG00000373	AFLA_075910	EQ963472	-	950714-952666	950676-952788	Methionine permease, putative [Source:UniProtKB/TrEMBL;Acc:B8MX04]
CADAFLAG00000374	AFLA_075920	EQ963472	-	954202–955245		Aldehyde reductase II [Source:UniProtKB/TrEMBL;Acc:B8MX05]
CADAFLAG00000375	AFLA_075930	EQ963472	+	956405–957514		C4-dicarboxylate transporter/malic acid transport protein, putative [Source:UniProtKB/TrEMBL;Acc:B8MX06]
CADAFLAG00000376	AFLA_075940	EQ963472	-	958972-959768	958697-960509	Putative uncharacterized protein [Source:UniProtKB/TrEMBL;Acc:B8MX07]
CADAFLAG00000377	AFLA_075950	EQ963472	+	962238–964210		Ferric-chelate reductase (Fre2), putative [Source:UniProtKB/TrEMBL;Acc:B8MX08]
CADAFLAG00000378	AFLA_075960	EQ963472	-	964899–965687		Putative uncharacterized protein [Source:UniProtKB/TrEMBL;Acc:B8MX09]
CADAFLAG00000379	AFLA_075970	EQ963472	-	966560-968579	966441-968874	Putative uncharacterized protein [Source:UniProtKB/TrEMBL;Acc:B8MX10]
CADAFLAG00000380	AFLA_075980	EQ963472	+	972979–974148		Choline monooxygenase, putative [Source:UniProtKB/TrEMBL;Acc:B8MX11]
CADAFLAG00000381	AFLA_075990	EQ963472	+	974725–975120		Putative uncharacterized protein [Source:UniProtKB/TrEMBL;Acc:B8MX12]
CADAFLAG00000382	AFLA_076000	EQ963472	+	975214–975810		Putative uncharacterized protein [Source:UniProtKB/TrEMBL;Acc:B8MX13]
CADAFLAG00000383	AFLA_076010	EQ963472	-	977011–981406		Zinc finger protein, putative [Source:UniProtKB/TrEMBL;Acc:B8MX14]
CADAFLAG00000384	AFLA_076020	EQ963472	+	982532-982938	982110-983119	Tropomyosin-1, putative [Source:UniProtKB/TrEMBL;Acc:B8MX15]
CADAFLAG00000385	AFLA_076030	EQ963472	-	984891–986134		Putative uncharacterized protein [Source:UniProtKB/TrEMBL;Acc:B8MX16]
CADAFLAG00000386	AFLA_076040	EQ963472	-	987703-990542	985826-996605	Putative uncharacterized protein [Source:UniProtKB/TrEMBL;Acc:B8MX17]
CADAFLAG00000387	AFLA_076050	EQ963472	-	992259–994169		Cellular morphogenesis protein (Rax2), putative [Source:UniProtKB/TrEMBL;Acc:B8MX18]
CADAFLAG00000388	AFLA_076060	EQ963472	+	997629-1001108	997629-1001219	Structure-specific recognition protein, putative [Source:UniProtKB/TrEMBL;Acc:B8MX19]
CADAFLAG00000389	AFLA_076070	EQ963472	+	1003830-1005519	1003041-1006242	Septin AspB [Source:UniProtKB/TrEMBL;Acc:B8MX20]
CADAFLAG00000390	AFLA_076080	EQ963472	+	1006554–1008306		Putative uncharacterized protein [Source:UniProtKB/TrEMBL;Acc:B8MX21]
CADAFLAG00000391	AFLA_076090	EQ963472	+	1008930-1010821	1008599-1012957	Mitochondrial carrier protein, putative [Source:UniProtKB/TrEMBL;Acc:B8MX22]
CADAFLAG00000392	AFLA_076100	EQ963472	+	1011010–1012306		Putative uncharacterized protein [Source:UniProtKB/TrEMBL;Acc:B8MX23]
CADAFLAG00000393	AFLA_076110	EQ963472	-	1014458–1016332		Putative uncharacterized protein [Source:UniProtKB/TrEMBL;Acc:B8MX24]
CADAFLAG00000394	AFLA_076120	EQ963472	+	1019386-1021940	1019288-1022168	Alpha-L-fucosidase 2, putative [Source:UniProtKB/TrEMBL;Acc:B8MX25]
CADAFLAG00000395	AFLA_076130	EQ963472	-	1022253-1023365	1022253-1024142	Beta-lactamase, putative [Source:UniProtKB/TrEMBL;Acc:B8MX26]
CADAFLAG00000396	AFLA_076140	EQ963472	-	1023386–1024142		Putative uncharacterized protein [Source:UniProtKB/TrEMBL;Acc:B8MX27]
CADAFLAG00000397	AFLA_076150	EQ963472	-	1024822–1026424		Putative uncharacterized protein [Source:UniProtKB/TrEMBL;Acc:B8MX28]
CADAFLAG00000398	AFLA_076160	EQ963472	+	1029652-1033001	1028416-1033261	Putative uncharacterized protein [Source:UniProtKB/TrEMBL;Acc:B8MX29]
CADAFLAG00000399	AFLA_076170	EQ963472	-	1034228-1035190	1034052-1036323	Putative uncharacterized protein [Source:UniProtKB/TrEMBL;Acc:B8MX30]
CADAFLAG00000400	AFLA_076180	EQ963472	+	1036224-1037104	1035932-1039767	Putative uncharacterized protein [Source:UniProtKB/TrEMBL;Acc:B8MX31]
CADAFLAG00000401	AFLA_076190	EQ963472	+	1038341–1038616		Putative uncharacterized protein [Source:UniProtKB/TrEMBL;Acc:B8MX32]
CADAFLAG00000402	AFLA_076200	EQ963472	-	1040259–1040998		HAD superfamily hydrolase, putative [Source:UniProtKB/TrEMBL;Acc:B8MX33]
CADAFLAG00000403	AFLA_076210	EQ963472	-	1042012–1042588		Putative uncharacterized protein [Source:UniProtKB/TrEMBL;Acc:B8MX34]
CADAFLAG00000404	AFLA_076220	EQ963472	-	1044867–1045061		Putative uncharacterized protein [Source:UniProtKB/TrEMBL;Acc:B8MX35]
CADAFLAG00000405	AFLA_076230	EQ963472	+	1046987-1047784	1045497-1048022	Putative uncharacterized protein [Source:UniProtKB/TrEMBL;Acc:B8MX36]
CADAFLAG00000406	AFLA_076240	EQ963472	+	1048318-1049761	1045501-1049773	Glutamate-1-semialdehyde 2,1-aminomutase, putative [Source:UniProtKB/TrEMBL;Acc:B8MX37]
CADAFLAG00000407	AFLA_076250	EQ963472	+	1050820–1051348		Putative uncharacterized protein [Source:UniProtKB/TrEMBL;Acc:B8MX38]
CADAFLAG00000408	AFLA_076260	EQ963472	-	1053294–1054064		Putative uncharacterized protein [Source:UniProtKB/TrEMBL;Acc:B8MX39]
CADAFLAG00000409	AFLA_076270	EQ963472	-	1055590–1056650		Putative uncharacterized protein [Source:UniProtKB/TrEMBL;Acc:B8MX40]
CADAFLAG00000410	AFLA_076280	EQ963472	-	1056961–1057575		Kelch repeat protein [Source:UniProtKB/TrEMBL;Acc:B8MX41]
CADAFLAG00000411	AFLA_076290	EQ963472	+	1060016–1061857		Capsule associated protein, putative [Source:UniProtKB/TrEMBL;Acc:B8MX42]
CADAFLAG00000412	AFLA_076300	EQ963472	-	1062456–1063001		Putative uncharacterized protein [Source:UniProtKB/TrEMBL;Acc:B8MX43]
CADAFLAG00000413	AFLA_076310	EQ963472	+	1064064–1064945		Putative uncharacterized protein [Source:UniProtKB/TrEMBL;Acc:B8MX44]
CADAFLAG00000414	AFLA_076320	EQ963472	-	1065506-1067361	1065341-1070118	C6 transcription factor, putative [Source:UniProtKB/TrEMBL;Acc:B8MX45]
CADAFLAG00000415	AFLA_076330	EQ963472	-	1067423–1067854		Putative uncharacterized protein [Source:UniProtKB/TrEMBL;Acc:B8MX46]
CADAFLAG00000416	AFLA_076340	EQ963472	+	1070487-1072050	1070487-1072120	C6 finger domain protein, putative [Source:UniProtKB/TrEMBL;Acc:B8MX47]
CADAFLAG00000417	AFLA_076350	EQ963472	-	1072165-1073089	1071958-1073089	Putative uncharacterized protein [Source:UniProtKB/TrEMBL;Acc:B8MX48]
CADAFLAG00000418	AFLA_076360	EQ963472	+	1074410-1078575	1074410-1079352	Putative uncharacterized protein [Source:UniProtKB/TrEMBL;Acc:B8MX49]
CADAFLAG00000419	AFLA_076370	EQ963472	+	1079834–1080817		Ankyrin repeat-containing protein, putative [Source:UniProtKB/TrEMBL;Acc:B8MX50]
CADAFLAG00000420	AFLA_076380	EQ963472	+	1081861-1082540	1081739-1084020	Mitochondrial intermembrane space protein Mia40 [Source:UniProtKB/TrEMBL;Acc:B8MX51]
CADAFLAG00000421	AFLA_076390	EQ963472	+	1082627–1082917		Putative uncharacterized protein [Source:UniProtKB/TrEMBL;Acc:B8MX52]
CADAFLAG00000422	AFLA_076400	EQ963472	-	1083958-1089989	1082819-1089989	Nonsense-mediated mRNA decay factor (Upf2), putative [Source:UniProtKB/TrEMBL;Acc:B8MX53]
CADAFLAG00000423	AFLA_076410	EQ963472	+	1090899-1091889	1090679-1091994	Putative uncharacterized protein [Source:UniProtKB/TrEMBL;Acc:B8MX54]
CADAFLAG00000424	AFLA_076420	EQ963472	+	1093065-1095357	1092816-1095586	Putative uncharacterized protein [Source:UniProtKB/TrEMBL;Acc:B8MX55]
CADAFLAG00000425	AFLA_076430	EQ963472	-	1097071-1098442	1096713-1099453	SUN domain protein (Uth1), putative [Source:UniProtKB/TrEMBL;Acc:B8MX56]
CADAFLAG00000426	AFLA_076440	EQ963472	+	1103631-1104890	1102855-1104890	Putative uncharacterized protein [Source:UniProtKB/TrEMBL;Acc:B8MX57]
CADAFLAG00000427	AFLA_076450	EQ963472	+	1105368-1106555	1105274-1106555	Electron transfer flavoprotein alpha subunit, putative [Source:UniProtKB/TrEMBL;Acc:B8MX58]
CADAFLAG00000428	AFLA_076460	EQ963472	+	1107650-1110556	1107197-1111136	Sister chromatid cohesion factor (Chl12), putative [Source:UniProtKB/TrEMBL;Acc:B8MX59]
CADAFLAG00000429	AFLA_076470	EQ963472	-	1111076–1111576		Putative uncharacterized protein [Source:UniProtKB/TrEMBL;Acc:B8MX60]
CADAFLAG00000430	AFLA_076480	EQ963472	+	1113674–1114342		Glutathione S-transferase, putative [Source:UniProtKB/TrEMBL;Acc:B8MX61]
CADAFLAG00000431	AFLA_076490	EQ963472	+	1115006-1117230	1114795-1117807	RSC complex subunit (RSC8), putative [Source:UniProtKB/TrEMBL;Acc:B8MX62]
CADAFLAG00000432	AFLA_076500	EQ963472	-	1117718-1119871	1117158-1119991	Putative uncharacterized protein [Source:UniProtKB/TrEMBL;Acc:B8MX63]
CADAFLAG00000433	AFLA_076510	EQ963472	+	1120153–1122200		DEAD/DEAH box helicase, putative [Source:UniProtKB/TrEMBL;Acc:B8MX64]
CADAFLAG00000434	AFLA_076520	EQ963472	-	1123180-1126614	1122493-1127090	GPI maturation protein (Bst1), putative [Source:UniProtKB/TrEMBL;Acc:B8MX65]
CADAFLAG00000435	AFLA_076530	EQ963472	-	1128308-1129943	1127829-1131430	Sugar transporter family protein [Source:UniProtKB/TrEMBL;Acc:B8MX66]
CADAFLAG00000436	AFLA_076540	EQ963472	-	1131867–1133719		Cytochrome P450, putative [Source:UniProtKB/TrEMBL;Acc:B8MX67]
CADAFLAG00000437	AFLA_076550	EQ963472	+	1135449-1137074	1134298-1137705	Putative uncharacterized protein [Source:UniProtKB/TrEMBL;Acc:B8MX68]
CADAFLAG00000438	AFLA_076560	EQ963472	-	1137614-1140265	1136976-1140821	APSES transcription factor (MbpA), putative [Source:UniProtKB/TrEMBL;Acc:B8MX69]
CADAFLAG00000439	AFLA_076570	EQ963472	+	1141015–1142277		Putative uncharacterized protein [Source:UniProtKB/TrEMBL;Acc:B8MX70]
CADAFLAG00000440	AFLA_076580	EQ963472	-	1143185-1143964	1142937-1144665	Trans-aconitate 2-methyltransferase, putative [Source:UniProtKB/TrEMBL;Acc:B8MX71]
CADAFLAG00000441	AFLA_076590	EQ963472	+	1144900-1146066	1143876-1146066	Glutamine-serine rich protein MS8, putative [Source:UniProtKB/TrEMBL;Acc:B8MX72]
CADAFLAG00000442	AFLA_076600	EQ963472	+	1149017–1152795		Translation elongation factor eEF-3, putative [Source:UniProtKB/TrEMBL;Acc:B8MX73]
CADAFLAG00000443	AFLA_076610	EQ963472	+	1154802–1157705		TPR domain protein [Source:UniProtKB/TrEMBL;Acc:B8MX74]
CADAFLAG00000444	AFLA_076620	EQ963472	-	1158108-1158941	1157610-1158989	Siroheme synthase Met8, putative [Source:UniProtKB/TrEMBL;Acc:B8MX75]
CADAFLAG00000445	AFLA_076630	EQ963472	+	1159120-1160825	1158692-1163769	Ribose phosphate diphosphokinase Prs1, putative [Source:UniProtKB/TrEMBL;Acc:B8MX76]
CADAFLAG00000446	AFLA_076640	EQ963472	-	1168101-1171036	1167885-1171280	Phospholipase PldA, putative [Source:UniProtKB/TrEMBL;Acc:B8MX77]
CADAFLAG00000447	AFLA_076650	EQ963472	+	1172667-1173749	1171304-1173749	DUF890 domain protein [Source:UniProtKB/TrEMBL;Acc:B8MX78]
CADAFLAG00000448	AFLA_076660	EQ963472	+	1174303–1174823		Putative uncharacterized protein [Source:UniProtKB/TrEMBL;Acc:B8MX79]
CADAFLAG00000449	AFLA_076670	EQ963472	-	1175704–1181844		Guanyl-nucleotide exchange factor (Sec7), putative [Source:UniProtKB/TrEMBL;Acc:B8MX80]
CADAFLAG00000450	AFLA_076680	EQ963472	+	1182111-1184111	1182105-1185629	Pyruvate dehydrogenase complex, dihydrolipoamide acetyltransferase [Source:UniProtKB/TrEMBL;Acc:B8MX81]
CADAFLAG00000451	AFLA_076690	EQ963472	+	1184404-1185254	1184306-1185629	Putative uncharacterized protein [Source:UniProtKB/TrEMBL;Acc:B8MX82]
CADAFLAG00000452	AFLA_076700	EQ963472	+	1186416–1187017		V-SNARE protein Bos1, putative [Source:UniProtKB/TrEMBL;Acc:B8MX83]
CADAFLAG00000453	AFLA_076710	EQ963472	+	1187274-1188798	1185845-1189320	Malate dehydrogenase, NAD-dependent [Source:UniProtKB/TrEMBL;Acc:B8MX84]
CADAFLAG00000454	AFLA_076720	EQ963472	-	1189224-1193212	1189217-1193317	AAA family ATPase, putative [Source:UniProtKB/TrEMBL;Acc:B8MX85]
CADAFLAG00000455	AFLA_076730	EQ963472	-	1194540–1195285		Putative uncharacterized protein [Source:UniProtKB/TrEMBL;Acc:B8MX86]
CADAFLAG00000456	AFLA_076740	EQ963472	-	1196124–1198652		Putative uncharacterized protein [Source:UniProtKB/TrEMBL;Acc:B8MX87]
CADAFLAG00000457	AFLA_076750	EQ963472	+	1198997-1199638	1198564-1200023	Putative uncharacterized protein [Source:UniProtKB/TrEMBL;Acc:B8MX88]
CADAFLAG00000458	AFLA_076760	EQ963472	-	1199824-1203149	1199645-1203324	Vacuolar morphogenesis protein AvaB, putative [Source:UniProtKB/TrEMBL;Acc:B8MX89]
CADAFLAG00000459	AFLA_076770	EQ963472	-	1204011-1205402	1203455-1206551	Fructose-2,6-bisphosphatase [Source:UniProtKB/TrEMBL;Acc:B8MX90]
CADAFLAG00000460	AFLA_076780	EQ963472	-	1207296-1208475	1206754-1208795	Ribonucleoprotein, putative [Source:UniProtKB/TrEMBL;Acc:B8MX91]
CADAFLAG00000461	AFLA_076790	EQ963472	-	1209615-1211718	1208954-1212729	MFS sugar transporter, putative [Source:UniProtKB/TrEMBL;Acc:B8MX92]
CADAFLAG00000462	AFLA_076800	EQ963472	+	1214960-1216043	1214689-1216079	Amidohydrolase family protein [Source:UniProtKB/TrEMBL;Acc:B8MX93]
CADAFLAG00000463	AFLA_076810	EQ963472	-	1216402–1218708		Putative uncharacterized protein [Source:UniProtKB/TrEMBL;Acc:B8MX94]
CADAFLAG00000464	AFLA_076820	EQ963472	+	1221794-1223734	1221271-1225581	Glucose oxidase, putative [Source:UniProtKB/TrEMBL;Acc:B8MX95]
CADAFLAG00000465	AFLA_076830	EQ963472	-	1224399-1224727	1223636-1225581	RING finger domain protein [Source:UniProtKB/TrEMBL;Acc:B8MX96]
CADAFLAG00000466	AFLA_076840	EQ963472	+	1225891-1226959	1225760-1227176	Proteasome subunit alpha type [Source:UniProtKB/TrEMBL;Acc:B8MX97]
CADAFLAG00000467	AFLA_076850	EQ963472	-	1230116-1231450	1228651-1231625	Putative uncharacterized protein [Source:UniProtKB/TrEMBL;Acc:B8MX98]
CADAFLAG00000468	AFLA_076860	EQ963472	+	1231869–1233331		MOSC domain protein [Source:UniProtKB/TrEMBL;Acc:B8MX99]
CADAFLAG00000469	AFLA_076870	EQ963472	-	1233607-1235480	1233607-1235771	Purine permease, putative [Source:UniProtKB/TrEMBL;Acc:B8MXA0]
CADAFLAG00000470	AFLA_076880	EQ963472	+	1238498-1239936	1238015-1239936	Stearic acid desaturase (SdeA), putative [Source:UniProtKB/TrEMBL;Acc:B8MXA1]
CADAFLAG00000471	AFLA_076890	EQ963472	+	1240705-1242911	1240396-1242911	Metallopeptidase MepB [Source:UniProtKB/TrEMBL;Acc:B8MXA2]
CADAFLAG00000472	AFLA_076900	EQ963472	+	1243261–1243830		Putative uncharacterized protein [Source:UniProtKB/TrEMBL;Acc:B8MXA3]
CADAFLAG00000473	AFLA_076910	EQ963472	-	1246308-1247549	1246300-1247680	Cytokinesis EF-hand protein Cdc4, putative [Source:UniProtKB/TrEMBL;Acc:B8MXA4]
CADAFLAG00000474	AFLA_076920	EQ963472	-	1248046–1251166		C2H2 finger domain protein, putative [Source:UniProtKB/TrEMBL;Acc:B8MXA5]
CADAFLAG00000475	AFLA_076930	EQ963472	-	1255496-1258994	1255496-1261016	Importin, putative [Source:UniProtKB/TrEMBL;Acc:B8MXA6]
CADAFLAG00000476	AFLA_076940	EQ963472	+	1259448-1259852	1258584-1260290	Small nuclear ribonucleoprotein SmE, putative [Source:UniProtKB/TrEMBL;Acc:B8MXA7]
CADAFLAG00000477	AFLA_076950	EQ963472	-	1260034–1260871		5-formyltetrahydrofolate cyclo-ligase, putative [Source:UniProtKB/TrEMBL;Acc:B8MXA8]
CADAFLAG00000478	AFLA_076960	EQ963472	+	1261229-1262134	1261111-1262134	Putative uncharacterized protein [Source:UniProtKB/TrEMBL;Acc:B8MXA9]
CADAFLAG00000479	AFLA_076970	EQ963472	-	1262539–1263154		Putative uncharacterized protein [Source:UniProtKB/TrEMBL;Acc:B8MXB0]
CADAFLAG00000480	AFLA_076980	EQ963472	+	1263630-1267926	1262868-1268802	Non-repetitive nucleoporin, putative [Source:UniProtKB/TrEMBL;Acc:B8MXB1]
CADAFLAG00000481	AFLA_076990	EQ963472	-	1268660-1269937	1267832-1271085	Alpha-ketoglutarate-dependent taurine dioxygenase [Source:UniProtKB/TrEMBL;Acc:B8MXB2]
CADAFLAG00000482	AFLA_077000	EQ963472	+	1271196–1271426		Putative uncharacterized protein [Source:UniProtKB/TrEMBL;Acc:B8MXB3]
CADAFLAG00000483	AFLA_077010	EQ963472	+	1273425-1274294	1271831-1275039	Integral membrane protein, putative [Source:UniProtKB/TrEMBL;Acc:B8MXB4]
CADAFLAG00000484	AFLA_077020	EQ963472	-	1274941-1276594	1274225-1277136	DNA damage-inducible v-SNARE binding protein Ddi1, putative [Source:UniProtKB/TrEMBL;Acc:B8MXB5]
CADAFLAG00000485	AFLA_077030	EQ963472	+	1281659-1283874	1281591-1284442	Siderochrome-iron transporter Sit1, putative [Source:UniProtKB/TrEMBL;Acc:B8MXB6]
CADAFLAG00000486	AFLA_077040	EQ963472	+	1287230–1288010		Pectate lyase, putative [Source:UniProtKB/TrEMBL;Acc:B8MXB7]
CADAFLAG00000487	AFLA_077050	EQ963472	+	1289001-1289942	1289001-1290037	Putative uncharacterized protein [Source:UniProtKB/TrEMBL;Acc:B8MXB8]
CADAFLAG00000488	AFLA_077060	EQ963472	-	1290861-1292108	1290408-1292596	Aldo/keto reductase, putative [Source:UniProtKB/TrEMBL;Acc:B8MXB9]
CADAFLAG00000489	AFLA_077070	EQ963472	-	1293082–1293801		Putative uncharacterized protein [Source:UniProtKB/TrEMBL;Acc:B8MXC0]
CADAFLAG00000490	AFLA_077080	EQ963472	-	1293891-1295767	1293082-1295789	Putative uncharacterized protein [Source:UniProtKB/TrEMBL;Acc:B8MXC1]
CADAFLAG00000491	AFLA_077090	EQ963472	-	1297315-1299078	1297190-1299106	Glycosyl hydrolase, putative [Source:UniProtKB/TrEMBL;Acc:B8MXC2]
CADAFLAG00000492	AFLA_077100	EQ963472	+	1300100-1300463	1299885-1300463	Putative uncharacterized protein [Source:UniProtKB/TrEMBL;Acc:B8MXC3]
CADAFLAG00000493	AFLA_077110	EQ963472	+	1303298–1304295		Putative uncharacterized protein [Source:UniProtKB/TrEMBL;Acc:B8MXC4]
CADAFLAG00000494	AFLA_077120	EQ963472	-	1307775–1308308		Putative uncharacterized protein [Source:UniProtKB/TrEMBL;Acc:B8MXC5]
CADAFLAG00000495	AFLA_077130	EQ963472	-	1311170–1311510		Putative uncharacterized protein [Source:UniProtKB/TrEMBL;Acc:B8MXC6]
CADAFLAG00000496	AFLA_077140	EQ963472	+	1312063–1313772		Putative uncharacterized protein [Source:UniProtKB/TrEMBL;Acc:B8MXC7]
CADAFLAG00000497	AFLA_077150	EQ963472	-	1313999–1316270		Amino acid transporter, putative [Source:UniProtKB/TrEMBL;Acc:B8MXC8]
CADAFLAG00000498	AFLA_077160	EQ963472	+	1317134–1318730		Amine oxidase, putative [Source:UniProtKB/TrEMBL;Acc:B8MXC9]
CADAFLAG00000499	AFLA_077170	EQ963472	+	1319221–1321284		Putative uncharacterized protein [Source:UniProtKB/TrEMBL;Acc:B8MXD0]
CADAFLAG00000500	AFLA_077180	EQ963472	-	1322029–1322662		Putative uncharacterized protein [Source:UniProtKB/TrEMBL;Acc:B8MXD1]
CADAFLAG00000501	AFLA_077190	EQ963472	-	1323314–1324935		Putative uncharacterized protein [Source:UniProtKB/TrEMBL;Acc:B8MXD2]
CADAFLAG00000502	AFLA_077200	EQ963472	+	1325852–1327219		Putative uncharacterized protein [Source:UniProtKB/TrEMBL;Acc:B8MXD3]
CADAFLAG00000503	AFLA_077210	EQ963472	-	1329153–1329626		NADPH fad oxidoreductase, putative [Source:UniProtKB/TrEMBL;Acc:B8MXD4]
CADAFLAG00000504	AFLA_077220	EQ963472	-	1329644-1332663	1329153-1332663	NADPH flavin oxidoreductase, putative [Source:UniProtKB/TrEMBL;Acc:B8MXD5]
CADAFLAG00000505	AFLA_077230	EQ963472	+	1333058-1333908	1332865-1333908	Putative uncharacterized protein [Source:UniProtKB/TrEMBL;Acc:B8MXD6]
CADAFLAG00000506	AFLA_077240	EQ963472	+	1334804-1335578	1334549-1338973	Putative uncharacterized protein [Source:UniProtKB/TrEMBL;Acc:B8MXD7]
CADAFLAG00000507	AFLA_077250	EQ963472	+	1339845–1342115		Acyl-coenzyme A oxidase [Source:UniProtKB/TrEMBL;Acc:B8MXD8]
CADAFLAG00000508	AFLA_077260	EQ963472	-	1342664–1343971		Aldo-keto reductase (YakC), putative [Source:UniProtKB/TrEMBL;Acc:B8MXD9]
CADAFLAG00000509	AFLA_077270	EQ963472	-	1345187-1346501	1345109-1348128	NADH-dependent flavin oxidoreductase, putative [Source:UniProtKB/TrEMBL;Acc:B8MXE0]
CADAFLAG00000510	AFLA_077280	EQ963472	+	1347490-1349565	1347391-1349667	Acyl-CoA dehydrogenase, putative [Source:UniProtKB/TrEMBL;Acc:B8MXE1]
CADAFLAG00000511	AFLA_077290	EQ963472	+	1350212-1351321	1349778-1355109	UMTA methyltransferase family protein [Source:UniProtKB/TrEMBL;Acc:B8MXE2]
CADAFLAG00000512	AFLA_077300	EQ963472	+	1353229–1355106		Sugar transporter, putative [Source:UniProtKB/TrEMBL;Acc:B8MXE3]
CADAFLAG00000513	AFLA_077310	EQ963472	-	1356288–1357028		Putative uncharacterized protein [Source:UniProtKB/TrEMBL;Acc:B8MXE4]
CADAFLAG00000514	AFLA_077320	EQ963472	+	1357945–1359258		Putative uncharacterized protein [Source:UniProtKB/TrEMBL;Acc:B8MXE5]
CADAFLAG00000515	AFLA_077330	EQ963472	-	1360084–1360610		Thioesterase family protein [Source:UniProtKB/TrEMBL;Acc:B8MXE6]
CADAFLAG00000516	AFLA_077340	EQ963472	-	1360748–1361224		Putative uncharacterized protein [Source:UniProtKB/TrEMBL;Acc:B8MXE7]
CADAFLAG00000517	AFLA_077350	EQ963472	+	1361474–1362114		Putative uncharacterized protein [Source:UniProtKB/TrEMBL;Acc:B8MXE8]
CADAFLAG00000518	AFLA_077360	EQ963472	+	1362699-1364746	1362452-1364836	Putative uncharacterized protein [Source:UniProtKB/TrEMBL;Acc:B8MXE9]
CADAFLAG00000519	AFLA_077370	EQ963472	-	1365852–1366356		Putative uncharacterized protein [Source:UniProtKB/TrEMBL;Acc:B8MXF0]
CADAFLAG00000520	AFLA_077380	EQ963472	-	1367132–1368397		Sugar transporter, putative [Source:UniProtKB/TrEMBL;Acc:B8MXF1]
CADAFLAG00000521	AFLA_077390	EQ963472	+	1369333-1371098	1369295-1372244	Putative uncharacterized protein [Source:UniProtKB/TrEMBL;Acc:B8MXF2]
CADAFLAG00000522	AFLA_077400	EQ963472	+	1374217–1375517		Monocarboxylate transporter, putative [Source:UniProtKB/TrEMBL;Acc:B8MXF3]
CADAFLAG00000523	AFLA_077410	EQ963472	-	1375766–1377163		Acyl-CoA dehydrogenase, putative [Source:UniProtKB/TrEMBL;Acc:B8MXF4]
CADAFLAG00000524	AFLA_077420	EQ963472	+	1377431–1378687		CAIB/BAIF family enzyme [Source:UniProtKB/TrEMBL;Acc:B8MXF5]
CADAFLAG00000525	AFLA_077430	EQ963472	+	1378869-1381322	1377098-1382029	Putative uncharacterized protein [Source:UniProtKB/TrEMBL;Acc:B8MXF6]
CADAFLAG00000526	AFLA_077440	EQ963472	+	1383565-1384638	1383175-1385261	Threonine aldolase, putative [Source:UniProtKB/TrEMBL;Acc:B8MXF7]
CADAFLAG00000527	AFLA_077450	EQ963472	-	1385164-1386186	1384563-1386292	Cinnamoyl-CoA reductase, putative [Source:UniProtKB/TrEMBL;Acc:B8MXF8]
CADAFLAG00000528	AFLA_077460	EQ963472	+	1386906-1390712	1386893-1390731	Ankyrin, putative [Source:UniProtKB/TrEMBL;Acc:B8MXF9]
CADAFLAG00000529	AFLA_077470	EQ963472	-	1391231-1393593	1390879-1393750	Thimet oligopeptidase, putative [Source:UniProtKB/TrEMBL;Acc:B8MXG0]
CADAFLAG00000530	AFLA_077480	EQ963472	+	1396104-1396568	1395581-1396841	Putative uncharacterized protein [Source:UniProtKB/TrEMBL;Acc:B8MXG1]
CADAFLAG00000531	AFLA_077490	EQ963472	+	1398602-1399171	1397561-1399871	Fungal specific transcription factor, putative [Source:UniProtKB/TrEMBL;Acc:B8MXG2]
CADAFLAG00000532	AFLA_077500	EQ963472	+	1399266–1399628		Putative uncharacterized protein [Source:UniProtKB/TrEMBL;Acc:B8MXG3]
CADAFLAG00000533	AFLA_077510	EQ963472	-	1400507-1401949	1399971-1402109	O-methyltransferase, putative [Source:UniProtKB/TrEMBL;Acc:B8MXG4]
CADAFLAG00000534	AFLA_077520	EQ963472	+	1403881-1405294	1401257-1405681	Putative uncharacterized protein [Source:UniProtKB/TrEMBL;Acc:B8MXG5]
CADAFLAG00000535	AFLA_077530	EQ963472	-	1405929–1406204		Putative uncharacterized protein [Source:UniProtKB/TrEMBL;Acc:B8MXG6]
CADAFLAG00000536	AFLA_077540	EQ963472	-	1406892-1407114	1406812-1408898	Putative uncharacterized protein [Source:UniProtKB/TrEMBL;Acc:B8MXG7]
CADAFLAG00000537	AFLA_077550	EQ963472	+	1408320-1408592	1406834-1408887	Putative uncharacterized protein [Source:UniProtKB/TrEMBL;Acc:B8MXG8]
CADAFLAG00000538	AFLA_077560	EQ963472	+	1409591-1411618	1409018-1411784	Choline transport protein, putative [Source:UniProtKB/TrEMBL;Acc:B8MXG9]
CADAFLAG00000539	AFLA_077570	EQ963472	+	1412181–1413166		Putative uncharacterized protein [Source:UniProtKB/TrEMBL;Acc:B8MXH0]
CADAFLAG00000540	AFLA_077580	EQ963472	+	1414280–1415527		Ribonuclease p/mrp subunit, putative [Source:UniProtKB/TrEMBL;Acc:B8MXH1]
CADAFLAG00000541	AFLA_077590	EQ963472	-	1415958–1417385		Putative uncharacterized protein [Source:UniProtKB/TrEMBL;Acc:B8MXH2]
CADAFLAG00000542	AFLA_077600	EQ963472	+	1419245–1419979		Putative uncharacterized protein [Source:UniProtKB/TrEMBL;Acc:B8MXH3]
CADAFLAG00000543	AFLA_077610	EQ963472	-	1420848-1422600	1420785-1422999	MFS drug efflux transporter, putative [Source:UniProtKB/TrEMBL;Acc:B8MXH4]
CADAFLAG00000544	AFLA_077620	EQ963472	-	1422619–1422931		Putative uncharacterized protein [Source:UniProtKB/TrEMBL;Acc:B8MXH5]
CADAFLAG00000545	AFLA_077630	EQ963472	-	1423819–1424496		Putative uncharacterized protein [Source:UniProtKB/TrEMBL;Acc:B8MXH6]
CADAFLAG00000546	AFLA_077640	EQ963472	-	1425237–1425692		Putative uncharacterized protein [Source:UniProtKB/TrEMBL;Acc:B8MXH7]
CADAFLAG00000547	AFLA_077650	EQ963472	-	1425756-1427722	1425090-1427722	Putative uncharacterized protein [Source:UniProtKB/TrEMBL;Acc:B8MXH8]
CADAFLAG00000548	AFLA_077660	EQ963472	-	1431437–1431902		Putative uncharacterized protein [Source:UniProtKB/TrEMBL;Acc:B8MXH9]
CADAFLAG00000549	AFLA_077670	EQ963472	-	1432006–1433148		Putative uncharacterized protein [Source:UniProtKB/TrEMBL;Acc:B8MXI0]
CADAFLAG00000550	AFLA_077680	EQ963472	+	1433871–1434518		Putative uncharacterized protein [Source:UniProtKB/TrEMBL;Acc:B8MXI1]
CADAFLAG00000551	AFLA_077690	EQ963472	+	1439359–1440069		Putative uncharacterized protein [Source:UniProtKB/TrEMBL;Acc:B8MXI2]
CADAFLAG00000552	AFLA_077700	EQ963472	+	1440150–1440605		Putative uncharacterized protein [Source:UniProtKB/TrEMBL;Acc:B8MXI3]
CADAFLAG00000553	AFLA_077710	EQ963472	+	1442630–1443970		Secretory lipase, putative [Source:UniProtKB/TrEMBL;Acc:B8MXI4]
CADAFLAG00000554	AFLA_077720	EQ963472	+	1444446–1444985		Putative uncharacterized protein [Source:UniProtKB/TrEMBL;Acc:B8MXI5]
CADAFLAG00000555	AFLA_077730	EQ963472	-	1445459–1446362		Carnitinyl-CoA dehydratase, putative [Source:UniProtKB/TrEMBL;Acc:B8MXI6]
CADAFLAG00000556	AFLA_077740	EQ963472	-	1447306-1448679	1446663-1448691	Acyl-CoA dehydrogenase [Source:UniProtKB/TrEMBL;Acc:B8MXI7]
CADAFLAG00000557	AFLA_077750	EQ963472	+	1449175–1451181		Putative uncharacterized protein [Source:UniProtKB/TrEMBL;Acc:B8MXI8]
CADAFLAG00000558	AFLA_077760	EQ963472	+	1451436–1451854		Putative uncharacterized protein [Source:UniProtKB/TrEMBL;Acc:B8MXI9]
CADAFLAG00000559	AFLA_077770	EQ963472	+	1451952–1454033		Putative uncharacterized protein [Source:UniProtKB/TrEMBL;Acc:B8MXJ0]
CADAFLAG00000560	AFLA_077780	EQ963472	-	1454634–1455377		Putative uncharacterized protein [Source:UniProtKB/TrEMBL;Acc:B8MXJ1]
CADAFLAG00000561	AFLA_077790	EQ963472	-	1457805-1458469	1456831-1458852	Putative uncharacterized protein [Source:UniProtKB/TrEMBL;Acc:B8MXJ2]
CADAFLAG00000562	AFLA_077800	EQ963472	-	1459687–1460832		Putative uncharacterized protein [Source:UniProtKB/TrEMBL;Acc:B8MXJ3]
CADAFLAG00000563	AFLA_077810	EQ963472	-	1461504–1462788		GPI anchored dioxygenase, putative [Source:UniProtKB/TrEMBL;Acc:B8MXJ4]
CADAFLAG00000564	AFLA_077820	EQ963472	+	1466314–1466867		Putative uncharacterized protein [Source:UniProtKB/TrEMBL;Acc:B8MXJ5]
CADAFLAG00000565	AFLA_077830	EQ963472	-	1467068-1469085	1467059-1469103	Choline dehydrogenase, putative [Source:UniProtKB/TrEMBL;Acc:B8MXJ6]
CADAFLAG00000566	AFLA_077840	EQ963472	-	1470974-1472077	1470797-1472278	Probable endo-beta-1,4-glucanase D [Source:UniProtKB/Swiss-Prot;Acc:B8MXJ7]
CADAFLAG00000567	AFLA_077850	EQ963472	-	1474280-1475932	1473958-1477842	Phenylalanine ammonia-lyase [Source:UniProtKB/TrEMBL;Acc:B8MXJ8]
CADAFLAG00000568	AFLA_077860	EQ963472	+	1478055-1479525	1477984-1479525	Putative uncharacterized protein [Source:UniProtKB/TrEMBL;Acc:B8MXJ9]
CADAFLAG00000569	AFLA_077870	EQ963472	+	1482105–1483736		Putative uncharacterized protein [Source:UniProtKB/TrEMBL;Acc:B8MXK0]
CADAFLAG00000570	AFLA_077880	EQ963472	-	1484200-1487043	1484028-1489191	K+ homeostasis protein Kha1, putative [Source:UniProtKB/TrEMBL;Acc:B8MXK1]
CADAFLAG00000571	AFLA_077890	EQ963472	-	1488268–1489191		Putative uncharacterized protein [Source:UniProtKB/TrEMBL;Acc:B8MXK2]
CADAFLAG00000572	AFLA_077900	EQ963472	-	1491452–1492063		Putative uncharacterized protein [Source:UniProtKB/TrEMBL;Acc:B8MXK3]
CADAFLAG00000573	AFLA_077910	EQ963472	-	1493509–1494979		Alpha-1,3-glucanase, putative [Source:UniProtKB/TrEMBL;Acc:B8MXK4]
CADAFLAG00000574	AFLA_077920	EQ963472	-	1496683-1498484	1496634-1498702	Glutamate decarboxylase [Source:UniProtKB/TrEMBL;Acc:B8MXK5]
CADAFLAG00000575	AFLA_077930	EQ963472	-	1499578–1500238		Putative uncharacterized protein [Source:UniProtKB/TrEMBL;Acc:B8MXK6]
CADAFLAG00000576	AFLA_077940	EQ963472	+	1500364–1500796		Putative uncharacterized protein [Source:UniProtKB/TrEMBL;Acc:B8MXK7]
CADAFLAG00000577	AFLA_077950	EQ963472	+	1501968–1503264		Toxin biosynthesis protein (Tri7), putative [Source:UniProtKB/TrEMBL;Acc:B8MXK8]
CADAFLAG00000578	AFLA_077960	EQ963472	+	1504885-1506730	1504885-1507006	Putative uncharacterized protein [Source:UniProtKB/TrEMBL;Acc:B8MXK9]
CADAFLAG00000579	AFLA_077970	EQ963472	+	1509522–1510845		Rieske 2Fe-2S family protein, putative [Source:UniProtKB/TrEMBL;Acc:B8MXL0]
CADAFLAG00000580	AFLA_077980	EQ963472	-	1511725-1512162	1511147-1512167	Putative uncharacterized protein [Source:UniProtKB/TrEMBL;Acc:B8MXL1]
CADAFLAG00000581	AFLA_077990	EQ963472	-	1514514–1515560		Zinc-binding oxidoreductase ToxD, putative [Source:UniProtKB/TrEMBL;Acc:B8MXL2]
CADAFLAG00000582	AFLA_078000	EQ963472	+	1516705–1517166		Putative uncharacterized protein [Source:UniProtKB/TrEMBL;Acc:B8MXL3]
CADAFLAG00000583	AFLA_078010	EQ963472	+	1518990–1519724		Sugar transporter, putative [Source:UniProtKB/TrEMBL;Acc:B8MXL4]
CADAFLAG00000584	AFLA_078020	EQ963472	+	1520941–1521997		Putative uncharacterized protein [Source:UniProtKB/TrEMBL;Acc:B8MXL5]
CADAFLAG00000585	AFLA_078030	EQ963472	+	1522891–1524757		Putative uncharacterized protein [Source:UniProtKB/TrEMBL;Acc:B8MXL6]
CADAFLAG00000586	AFLA_078040	EQ963472	-	1524956-1525759	1524879-1525759	(S)-2-haloacid dehalogenase IVA, putative [Source:UniProtKB/TrEMBL;Acc:B8MXL7]
CADAFLAG00000587	AFLA_078050	EQ963472	+	1531889–1533465		Cytochrome P450 monooxygenase, putative [Source:UniProtKB/TrEMBL;Acc:B8MXL8]
CADAFLAG00000588	AFLA_078060	EQ963472	+	1534566–1536256		FAD-binding oxidoreductase, putative [Source:UniProtKB/TrEMBL;Acc:B8MXL9]
CADAFLAG00000589	AFLA_078070	EQ963472	-	1536650–1537123		Putative uncharacterized protein [Source:UniProtKB/TrEMBL;Acc:B8MXM0]
CADAFLAG00000590	AFLA_078080	EQ963472	-	1539122–1539967		Putative uncharacterized protein [Source:UniProtKB/TrEMBL;Acc:B8MXM1]
CADAFLAG00000591	AFLA_078090	EQ963472	-	1542521-1543489	1542022-1544331	Alcohol dehydrogenase, putative [Source:UniProtKB/TrEMBL;Acc:B8MXM2]
CADAFLAG00000592	AFLA_078100	EQ963472	-	1543612–1544247		Putative uncharacterized protein [Source:UniProtKB/TrEMBL;Acc:B8MXM3]
CADAFLAG00000593	AFLA_078110	EQ963472	+	1544992-1546334	1544844-1546720	C-14 sterol reductase, putative [Source:UniProtKB/TrEMBL;Acc:B8MXM4]
CADAFLAG00000594	AFLA_078120	EQ963472	-	1547032–1548183		Cell wall glucanase/allergen F16-like protein [Source:UniProtKB/TrEMBL;Acc:B8MXM5]
CADAFLAG00000595	AFLA_078130	EQ963472	+	1550274–1551726		Mannan endo-1,6-alpha-mannosidase DCW1, putative [Source:UniProtKB/TrEMBL;Acc:B8MXM6]
CADAFLAG00000596	AFLA_078140	EQ963472	-	1551809–1552531		Acetyltransferase, GNAT family [Source:UniProtKB/TrEMBL;Acc:B8MXM7]
CADAFLAG00000597	AFLA_078150	EQ963472	+	1554522–1554928		Putative uncharacterized protein [Source:UniProtKB/TrEMBL;Acc:B8MXM8]
CADAFLAG00000598	AFLA_078160	EQ963472	+	1555819–1556104		Putative uncharacterized protein [Source:UniProtKB/TrEMBL;Acc:B8MXM9]
CADAFLAG00000599	AFLA_078170	EQ963472	+	1556754-1557152	1556754-1558018	Putative uncharacterized protein [Source:UniProtKB/TrEMBL;Acc:B8MXN0]
CADAFLAG00000600	AFLA_078180	EQ963472	+	1557186–1557692		Putative uncharacterized protein [Source:UniProtKB/TrEMBL;Acc:B8MXN1]
CADAFLAG00000601	AFLA_078190	EQ963472	-	1557925-1559449	1557805-1559494	Zinc finger protein DHHC domain containing protein, putative [Source:UniProtKB/TrEMBL;Acc:B8MXN2]
CADAFLAG00000602	AFLA_078200	EQ963472	+	1559783–1560333		DNA mismatch repair protein mutl, putative [Source:UniProtKB/TrEMBL;Acc:B8MXN3]
CADAFLAG00000603	AFLA_078210	EQ963472	+	1562917-1564021	1562781-1564434	DUF1295 domain protein [Source:UniProtKB/TrEMBL;Acc:B8MXN4]
CADAFLAG00000604	AFLA_078220	EQ963472	-	1564206-1565584	1563926-1565722	Dehydrogenase, putative [Source:UniProtKB/TrEMBL;Acc:B8MXN5]
CADAFLAG00000605	AFLA_078230	EQ963472	-	1566030-1566881	1565995-1566988	Acetyltransferase, GNAT family [Source:UniProtKB/TrEMBL;Acc:B8MXN6]
CADAFLAG00000606	AFLA_078240	EQ963472	-	1567377–1568207		Putative uncharacterized protein [Source:UniProtKB/TrEMBL;Acc:B8MXN7]
CADAFLAG00000607	AFLA_078250	EQ963472	-	1569424-1572992	1569144-1573951	Serine/threonine protein kinase, putative [Source:UniProtKB/TrEMBL;Acc:B8MXN8]
CADAFLAG00000608	AFLA_078260	EQ963472	+	1573747-1574644	1573376-1575793	OPA3 domain protein [Source:UniProtKB/TrEMBL;Acc:B8MXN9]
CADAFLAG00000609	AFLA_078270	EQ963472	+	1576722-1580979	1576160-1582721	Myosin I MyoA/Myo5 [Source:UniProtKB/TrEMBL;Acc:B8MXP0]
CADAFLAG00000610	AFLA_078280	EQ963472	-	1583027–1585500		WD repeat protein [Source:UniProtKB/TrEMBL;Acc:B8MXP1]
CADAFLAG00000611	AFLA_078290	EQ963472	-	1587149-1590985	1582900-1591966	Chitin synthase F [Source:UniProtKB/TrEMBL;Acc:B8MXP2]
CADAFLAG00000612	AFLA_078300	EQ963472	+	1595759-1597878	1595112-1598284	Chitin synthase activator (Chs3), putative [Source:UniProtKB/TrEMBL;Acc:B8MXP3]
CADAFLAG00000613	AFLA_078310	EQ963472	+	1599435-1599794	1595084-1600047	Putative uncharacterized protein [Source:UniProtKB/TrEMBL;Acc:B8MXP4]
CADAFLAG00000614	AFLA_078320	EQ963472	-	1603161-1605021	1602949-1605336	Probable beta-glucosidase btgE [Source:UniProtKB/Swiss-Prot;Acc:B8MXP5]
CADAFLAG00000615	AFLA_078330	EQ963472	-	1608276-1609022	1608115-1609538	Putative uncharacterized protein [Source:UniProtKB/TrEMBL;Acc:B8MXP6]
CADAFLAG00000616	AFLA_078340	EQ963472	-	1609924–1610709		Putative uncharacterized protein [Source:UniProtKB/TrEMBL;Acc:B8MXP7]
CADAFLAG00000617	AFLA_078350	EQ963472	+	1611463–1612565		Putative uncharacterized protein [Source:UniProtKB/TrEMBL;Acc:B8MXP8]
CADAFLAG00000618	AFLA_078360	EQ963472	+	1613634-1614359	1613509-1614598	Putative uncharacterized protein [Source:UniProtKB/TrEMBL;Acc:B8MXP9]
CADAFLAG00000619	AFLA_078370	EQ963472	-	1614516–1615361		Oxidoreductase, short chain dehydrogenase/reductase family [Source:UniProtKB/TrEMBL;Acc:B8MXQ0]
CADAFLAG00000620	AFLA_078380	EQ963472	-	1615903-1617653	1614291-1617862	Acetyl-coA hydrolase Ach1, putative [Source:UniProtKB/TrEMBL;Acc:B8MXQ1]
CADAFLAG00000621	AFLA_078390	EQ963472	-	1619273-1624400	1618604-1624884	Transcription factor (Sin3), putative [Source:UniProtKB/TrEMBL;Acc:B8MXQ2]
CADAFLAG00000622	AFLA_078400	EQ963472	-	1625245-1628462	1625245-1628571	Protein phosphatase PP2A regulatory B subunit, putative [Source:UniProtKB/TrEMBL;Acc:B8MXQ3]
CADAFLAG00000623	AFLA_078410	EQ963472	+	1629680-1630690	1629189-1631178	Putative uncharacterized protein [Source:UniProtKB/TrEMBL;Acc:B8MXQ4]
CADAFLAG00000624	AFLA_078420	EQ963472	-	1631080–1633180		Fumarate reductase Osm1, putative [Source:UniProtKB/TrEMBL;Acc:B8MXQ5]
CADAFLAG00000625	AFLA_078430	EQ963472	-	1635038-1636680	1634038-1637392	Aldehyde dehydrogenase family protein [Source:UniProtKB/TrEMBL;Acc:B8MXQ6]
CADAFLAG00000626	AFLA_078440	EQ963472	+	1639729–1640898		Integral membrane protein [Source:UniProtKB/TrEMBL;Acc:B8MXQ7]
CADAFLAG00000627	AFLA_078450	EQ963472	-	1641325-1642575	1641046-1642688	COP9 signalosome subunit CsnD [Source:UniProtKB/TrEMBL;Acc:B8MXQ8]
CADAFLAG00000628	AFLA_078460	EQ963472	+	1643357–1644700		Transcription initiation factor IIF subunit beta, putative [Source:UniProtKB/TrEMBL;Acc:B8MXQ9]
CADAFLAG00000629	AFLA_078470	EQ963472	+	1645094-1646704	1644995-1649301	Putative uncharacterized protein [Source:UniProtKB/TrEMBL;Acc:B8MXR0]
CADAFLAG00000630	AFLA_078480	EQ963472	+	1647622–1649213		Cysteine protease, putative [Source:UniProtKB/TrEMBL;Acc:B8MXR1]
CADAFLAG00000631	AFLA_078490	EQ963472	+	1653024-1653246	1652058-1653643	Putative uncharacterized protein [Source:UniProtKB/TrEMBL;Acc:B8MXR2]
CADAFLAG00000632	AFLA_078500	EQ963472	+	1655182-1657138	1654420-1658197	BZIP transcription factor, putative [Source:UniProtKB/TrEMBL;Acc:B8MXR3]
CADAFLAG00000633	AFLA_078510	EQ963472	-	1658637-1660965	1657040-1663042	Putative uncharacterized protein [Source:UniProtKB/TrEMBL;Acc:B8MXR4]
CADAFLAG00000634	AFLA_078520	EQ963472	-	1661701–1663028		Mitochondrial ATPase subunit ATP4, putative [Source:UniProtKB/TrEMBL;Acc:B8MXR5]
CADAFLAG00000635	AFLA_078530	EQ963472	+	1663241-1665003	1663203-1665383	Ribosome biogenesis protein Noc4, putative [Source:UniProtKB/TrEMBL;Acc:B8MXR6]
CADAFLAG00000636	AFLA_078540	EQ963472	-	1665287-1666479	1664942-1666504	Putative uncharacterized protein [Source:UniProtKB/TrEMBL;Acc:B8MXR7]
CADAFLAG00000637	AFLA_078550	EQ963472	-	1667923–1668442		Putative uncharacterized protein [Source:UniProtKB/TrEMBL;Acc:B8MXR8]
CADAFLAG00000638	AFLA_078560	EQ963472	-	1669139–1669555		Putative uncharacterized protein [Source:UniProtKB/TrEMBL;Acc:B8MXR9]
CADAFLAG00000639	AFLA_078570	EQ963472	-	1670346-1674343	1670120-1674343	Putative uncharacterized protein [Source:UniProtKB/TrEMBL;Acc:B8MXS0]
CADAFLAG00000640	AFLA_078580	EQ963472	-	1675029-1677269	1674885-1677597	Putative uncharacterized protein [Source:UniProtKB/TrEMBL;Acc:B8MXS1]
CADAFLAG00000641	AFLA_078590	EQ963472	+	1678775–1679461		Extracellular matrix protein, putative [Source:UniProtKB/TrEMBL;Acc:B8MXS2]
CADAFLAG00000642	AFLA_078600	EQ963472	-	1680124-1683623	1679363-1683925	DNA repair/transcription protein, putative [Source:UniProtKB/TrEMBL;Acc:B8MXS3]
CADAFLAG00000643	AFLA_078610	EQ963472	+	1683834-1684845	1683796-1684845	Putative uncharacterized protein [Source:UniProtKB/TrEMBL;Acc:B8MXS4]
CADAFLAG00000644	AFLA_078620	EQ963472	-	1684941-1686007	1684859-1686051	DUF850 domain protein [Source:UniProtKB/TrEMBL;Acc:B8MXS5]
CADAFLAG00000645	AFLA_078630	EQ963472	+	1686267-1686994	1685839-1687692	Signal peptidase complex component, putative [Source:UniProtKB/TrEMBL;Acc:B8MXS6]
CADAFLAG00000646	AFLA_078640	EQ963472	-	1687478-1688735	1686911-1689050	Methylenetetrahydrofolate dehydrogenase [Source:UniProtKB/TrEMBL;Acc:B8MXS7]
CADAFLAG00000647	AFLA_078650	EQ963472	-	1689260-1691852	1689260-1693759	ATP synthase subunit alpha [Source:UniProtKB/TrEMBL;Acc:B8MXS8]
CADAFLAG00000648	AFLA_078660	EQ963472	-	1692744–1693500		DUF962 domain protein [Source:UniProtKB/TrEMBL;Acc:B8MXS9]
CADAFLAG00000649	AFLA_078670	EQ963472	+	1694332-1695025	1693921-1695349	RNA polymerase II subunit 7 [Source:UniProtKB/TrEMBL;Acc:B8MXT0]
CADAFLAG00000650	AFLA_078680	EQ963472	+	1696659-1698268	1696177-1698347	Putative uncharacterized protein [Source:UniProtKB/TrEMBL;Acc:B8MXT1]
CADAFLAG00000651	AFLA_078690	EQ963472	-	1698785-1702084	1698170-1702154	RNA interference and gene silencing protein (Qde2), putative [Source:UniProtKB/TrEMBL;Acc:B8MXT2]
CADAFLAG00000652	AFLA_078700	EQ963472	+	1704545-1707095	1703404-1707474	C6 transcription factor, putative [Source:UniProtKB/TrEMBL;Acc:B8MXT3]
CADAFLAG00000653	AFLA_078710	EQ963472	+	1707886–1708804		Nucleic acid-binding protein [Source:UniProtKB/TrEMBL;Acc:B8MXT4]
CADAFLAG00000654	AFLA_078720	EQ963472	+	1709109-1711166	1707540-1711166	Peroxisomal targeting receptor pex5, putative [Source:UniProtKB/TrEMBL;Acc:B8MXT5]
CADAFLAG00000655	AFLA_078730	EQ963472	+	1712581-1712964	1712123-1712964	Putative uncharacterized protein [Source:UniProtKB/TrEMBL;Acc:B8MXT6]
CADAFLAG00000656	AFLA_078740	EQ963472	+	1713589–1715452		2-hydroxyphytanoyl-CoA lyase, putative [Source:UniProtKB/TrEMBL;Acc:B8MXT7]
CADAFLAG00000657	AFLA_078750	EQ963472	-	1715618–1717271		Putative uncharacterized protein [Source:UniProtKB/TrEMBL;Acc:B8MXT8]
CADAFLAG00000658	AFLA_078760	EQ963472	+	1717375–1719055		Cysteine synthase, putative [Source:UniProtKB/TrEMBL;Acc:B8MXT9]
CADAFLAG00000659	AFLA_078770	EQ963472	-	1719446–1721143		Myb-like DNA-binding domain protein [Source:UniProtKB/TrEMBL;Acc:B8MXU0]
CADAFLAG00000660	AFLA_078780	EQ963472	+	1721680-1723383	1721574-1723498	Autophagy protein Apg6, putative [Source:UniProtKB/TrEMBL;Acc:B8MXU1]
CADAFLAG00000661	AFLA_078790	EQ963472	+	1729511-1730839	1727539-1732614	Putative uncharacterized protein [Source:UniProtKB/TrEMBL;Acc:B8MXU2]
CADAFLAG00000662	AFLA_078800	EQ963472	-	1734155-1735442	1733783-1735793	Peroxisomal membrane protein (Pex13), putative [Source:UniProtKB/TrEMBL;Acc:B8MXU3]
CADAFLAG00000663	AFLA_078810	EQ963472	-	1736189–1738116		Oxidoreductin [Source:UniProtKB/TrEMBL;Acc:B8MXU4]
CADAFLAG00000664	AFLA_078820	EQ963472	-	1740436-1741239	1740423-1741487	Putative uncharacterized protein [Source:UniProtKB/TrEMBL;Acc:B8MXU5]
CADAFLAG00000665	AFLA_078830	EQ963472	+	1744605–1745223		Putative uncharacterized protein [Source:UniProtKB/TrEMBL;Acc:B8MXU6]
CADAFLAG00000666	AFLA_078840	EQ963472	-	1746002-1747534	1745596-1747811	MFS transporter, putative [Source:UniProtKB/TrEMBL;Acc:B8MXU7]
CADAFLAG00000667	AFLA_078850	EQ963472	+	1750269-1752062	1747261-1752192	Neutral amino acid permease [Source:UniProtKB/TrEMBL;Acc:B8MXU8]
CADAFLAG00000668	AFLA_078860	EQ963472	+	1752581–1752978		Putative uncharacterized protein [Source:UniProtKB/TrEMBL;Acc:B8MXU9]
CADAFLAG00000669	AFLA_078870	EQ963472	+	1753171–1753651		Putative uncharacterized protein [Source:UniProtKB/TrEMBL;Acc:B8MXV0]
CADAFLAG00000670	AFLA_078880	EQ963472	-	1754184–1756103		Putative uncharacterized protein [Source:UniProtKB/TrEMBL;Acc:B8MXV1]
CADAFLAG00000671	AFLA_078890	EQ963472	+	1757051-1758001	1756417-1758151	Dihydrodipicolinate synthetase family protein [Source:UniProtKB/TrEMBL;Acc:B8MXV2]
CADAFLAG00000672	AFLA_078900	EQ963472	+	1762947–1764749		Beta-hexosaminidase [Source:UniProtKB/TrEMBL;Acc:B8MXV3]
CADAFLAG00000673	AFLA_078910	EQ963472	+	1765096–1765448		Putative uncharacterized protein [Source:UniProtKB/TrEMBL;Acc:B8MXV4]
CADAFLAG00000674	AFLA_078920	EQ963472	+	1778022-1780841	1777996-1780910	C2H2 finger domain protein, putative [Source:UniProtKB/TrEMBL;Acc:B8MXV5]
CADAFLAG00000675	AFLA_078930	EQ963472	-	1782364–1783465		Putative uncharacterized protein [Source:UniProtKB/TrEMBL;Acc:B8MXV6]
CADAFLAG00000676	AFLA_078940	EQ963472	+	1786665–1787028		Putative uncharacterized protein [Source:UniProtKB/TrEMBL;Acc:B8MXV7]
CADAFLAG00000677	AFLA_078950	EQ963472	-	1787270-1790346	1781999-1791419	Putative uncharacterized protein [Source:UniProtKB/TrEMBL;Acc:B8MXV8]
CADAFLAG00000678	AFLA_078960	EQ963472	+	1790804-1791735	1790769-1791937	Small nuclear ribonucleoprotein SmG, putative [Source:UniProtKB/TrEMBL;Acc:B8MXV9]
CADAFLAG00000679	AFLA_078970	EQ963472	-	1791842–1795818		Transcription initiation factor TFIID subunit TSM1/127kD, putative [Source:UniProtKB/TrEMBL;Acc:B8MXW0]
CADAFLAG00000680	AFLA_078980	EQ963472	+	1796613-1798123	1796325-1799169	sn-1,2-diacylglycerol cholinephosphotransferase [Source:UniProtKB/TrEMBL;Acc:B8MXW1]
CADAFLAG00000681	AFLA_078990	EQ963472	+	1799653-1801978	1799375-1802945	Choline transporter Hnm1, putative [Source:UniProtKB/TrEMBL;Acc:B8MXW2]
CADAFLAG00000682	AFLA_079000	EQ963472	-	1802373-1803307	1801427-1803616	Putative uncharacterized protein [Source:UniProtKB/TrEMBL;Acc:B8MXW3]
CADAFLAG00000683	AFLA_079010	EQ963472	-	1804692-1805113	1803671-1805113	Putative uncharacterized protein [Source:UniProtKB/TrEMBL;Acc:B8MXW4]
CADAFLAG00000684	AFLA_079020	EQ963472	+	1805286-1805983	1803671-1806278	Putative uncharacterized protein [Source:UniProtKB/TrEMBL;Acc:B8MXW5]
CADAFLAG00000685	AFLA_079030	EQ963472	+	1806747–1808213		Putative uncharacterized protein [Source:UniProtKB/TrEMBL;Acc:B8MXW6]
CADAFLAG00000686	AFLA_079040	EQ963472	+	1808578-1810523	1808558-1810899	COP9 signalosome subunit 1 (CsnA), putative [Source:UniProtKB/TrEMBL;Acc:B8MXW7]
CADAFLAG00000687	AFLA_079050	EQ963472	-	1810804–1812511		MFS transporter, putative [Source:UniProtKB/TrEMBL;Acc:B8MXW8]
CADAFLAG00000688	AFLA_079060	EQ963472	+	1813179-1813520	1812835-1814131	Putative uncharacterized protein [Source:UniProtKB/TrEMBL;Acc:B8MXW9]
CADAFLAG00000689	AFLA_079070	EQ963472	+	1814661-1817095	1814475-1817475	RING finger protein [Source:UniProtKB/TrEMBL;Acc:B8MXX0]
CADAFLAG00000690	AFLA_079080	EQ963472	-	1819872-1823514	1819733-1824054	Putative uncharacterized protein [Source:UniProtKB/TrEMBL;Acc:B8MXX1]
CADAFLAG00000691	AFLA_079090	EQ963472	-	1823538-1823951	1821564-1824054	Putative uncharacterized protein [Source:UniProtKB/TrEMBL;Acc:B8MXX2]
CADAFLAG00000692	AFLA_079100	EQ963472	+	1826803–1828470		Putative uncharacterized protein [Source:UniProtKB/TrEMBL;Acc:B8MXX3]
CADAFLAG00000693	AFLA_079110	EQ963472	+	1830328-1831569	1829668-1832038	Putative uncharacterized protein [Source:UniProtKB/TrEMBL;Acc:B8MXX4]
CADAFLAG00000694	AFLA_079120	EQ963472	+	1832687-1834724	1832167-1835156	Putative uncharacterized protein [Source:UniProtKB/TrEMBL;Acc:B8MXX5]
CADAFLAG00000695	AFLA_079130	EQ963472	-	1836010-1837019	1836010-1837097	Ribonuclease P complex subunit Pop2, putative [Source:UniProtKB/TrEMBL;Acc:B8MXX6]
CADAFLAG00000696	AFLA_079140	EQ963472	+	1837493–1838714		Casein kinase, putative [Source:UniProtKB/TrEMBL;Acc:B8MXX7]
CADAFLAG00000697	AFLA_079150	EQ963472	+	1839988-1843371	1837082-1843431	Valyl-tRNA synthetase [Source:UniProtKB/TrEMBL;Acc:B8MXX8]
CADAFLAG00000698	AFLA_079160	EQ963472	+	1843742–1844848		Ribosome biogenesis protein, putative [Source:UniProtKB/TrEMBL;Acc:B8MXX9]
CADAFLAG00000699	AFLA_079170	EQ963472	+	1845417-1846377	1845263-1846719	Peroxisomal membrane protein (PmpP24), putative [Source:UniProtKB/TrEMBL;Acc:B8MXY0]
CADAFLAG00000700	AFLA_079180	EQ963472	-	1846428-1849696	1846185-1849696	Ankyrin, putative [Source:UniProtKB/TrEMBL;Acc:B8MXY1]
CADAFLAG00000701	AFLA_079190	EQ963472	-	1852479-1854769	1852479-1854872	Acetoacetyl-CoA synthase [Source:UniProtKB/TrEMBL;Acc:B8MXY2]
CADAFLAG00000702	AFLA_079200	EQ963472	+	1855837–1856943		N-ethylmaleimide reductase, putative [Source:UniProtKB/TrEMBL;Acc:B8MXY3]
CADAFLAG00000703	AFLA_079210	EQ963472	+	1860078–1860857		Ankyrin repeat-containing protein, putative [Source:UniProtKB/TrEMBL;Acc:B8MXY4]
CADAFLAG00000704	AFLA_079220	EQ963472	-	1862273–1863289		Glucose dehydrogenase, putative [Source:UniProtKB/TrEMBL;Acc:B8MXY5]
CADAFLAG00000705	AFLA_079230	EQ963472	-	1863572–1865207		Putative uncharacterized protein [Source:UniProtKB/TrEMBL;Acc:B8MXY6]
CADAFLAG00000706	AFLA_079240	EQ963472	+	1866835–1868335		Monocarboxylate transporter, putative [Source:UniProtKB/TrEMBL;Acc:B8MXY7]
CADAFLAG00000707	AFLA_079250	EQ963472	+	1868626–1869333		Putative uncharacterized protein [Source:UniProtKB/TrEMBL;Acc:B8MXY8]
CADAFLAG00000708	AFLA_079260	EQ963472	+	1871865–1872869		Alcohol dehydrogenase, putative [Source:UniProtKB/TrEMBL;Acc:B8MXY9]
CADAFLAG00000709	AFLA_079270	EQ963472	-	1873086–1874510		Putative uncharacterized protein [Source:UniProtKB/TrEMBL;Acc:B8MXZ0]
CADAFLAG00000710	AFLA_079280	EQ963472	-	1875148–1875630		L-PSP endoribonuclease family protein, putative [Source:UniProtKB/TrEMBL;Acc:B8MXZ1]
CADAFLAG00000711	AFLA_079290	EQ963472	-	1875825–1877436		Aldehyde dehydrogenase (AldH12), putative [Source:UniProtKB/TrEMBL;Acc:B8MXZ2]
CADAFLAG00000712	AFLA_079300	EQ963472	-	1877829–1879161		2-amino-3-carboxymuconate-6-semialdehyde decarboxylase, putative [Source:UniProtKB/TrEMBL;Acc:B8MXZ3]
CADAFLAG00000713	AFLA_079310	EQ963472	+	1879478–1880235		3-hydroxyanthranilate 3,4-dioxygenase, putative [Source:UniProtKB/TrEMBL;Acc:B8MXZ4]
CADAFLAG00000714	AFLA_079320	EQ963472	-	1880467–1882763		Putative uncharacterized protein [Source:UniProtKB/TrEMBL;Acc:B8MXZ5]
CADAFLAG00000715	AFLA_079330	EQ963472	-	1883652–1885259		Amino acid transporter, putative [Source:UniProtKB/TrEMBL;Acc:B8MXZ6]
CADAFLAG00000716	AFLA_079340	EQ963472	+	1886382–1887372		Dienelactone hydrolase, putative [Source:UniProtKB/TrEMBL;Acc:B8MXZ7]
CADAFLAG00000717	AFLA_079350	EQ963472	-	1890073-1890807	1889858-1892049	Putative uncharacterized protein [Source:UniProtKB/TrEMBL;Acc:B8MXZ8]
CADAFLAG00000718	AFLA_079360	EQ963472	-	1892237–1892994		PKS-like enzyme, putative [Source:UniProtKB/TrEMBL;Acc:B8MXZ9]
CADAFLAG00000719	AFLA_079370	EQ963472	+	1894296–1894484		Putative uncharacterized protein [Source:UniProtKB/TrEMBL;Acc:B8MY00]
CADAFLAG00000720	AFLA_079380	EQ963472	+	1894656-1897651	1894211-1897988	NRPS-like enzyme, putative [Source:UniProtKB/TrEMBL;Acc:B8MY01]
CADAFLAG00000721	AFLA_079390	EQ963472	+	1898598–1899094		Putative uncharacterized protein [Source:UniProtKB/TrEMBL;Acc:B8MY02]
CADAFLAG00000722	AFLA_079400	EQ963472	+	1901221-1905057	1900841-1905448	NRPS-like enzyme, putative [Source:UniProtKB/TrEMBL;Acc:B8MY03]
CADAFLAG00000723	AFLA_079410	EQ963472	+	1905565-1907524	1905558-1907524	MFS transporter, putative [Source:UniProtKB/TrEMBL;Acc:B8MY04]
CADAFLAG00000724	AFLA_079420	EQ963472	-	1907742-1908365	1907426-1908522	Putative uncharacterized protein [Source:UniProtKB/TrEMBL;Acc:B8MY05]
CADAFLAG00000725	AFLA_079430	EQ963472	-	1910291-1911075	1909910-1911422	Amidase, putative [Source:UniProtKB/TrEMBL;Acc:B8MY06]
CADAFLAG00000726	AFLA_079440	EQ963472	+	1912113-1913531	1910985-1914808	Allantoate permease, putative [Source:UniProtKB/TrEMBL;Acc:B8MY07]
CADAFLAG00000727	AFLA_079450	EQ963472	+	1913795–1914532		Ureidoglycolate hydrolase, putative [Source:UniProtKB/TrEMBL;Acc:B8MY08]
CADAFLAG00000728	AFLA_079460	EQ963472	-	1914711-1917746	1914484-1917746	DNA mismatch repair protein Msh1, putative [Source:UniProtKB/TrEMBL;Acc:B8MY09]
CADAFLAG00000729	AFLA_079470	EQ963472	+	1918357–1924989		Pre-mRNA splicing helicase, putative [Source:UniProtKB/TrEMBL;Acc:B8MY10]
CADAFLAG00000730	AFLA_079480	EQ963472	+	1925515-1927778	1918071-1928957	Oligopeptidase family protein [Source:UniProtKB/TrEMBL;Acc:B8MY11]
CADAFLAG00000731	AFLA_079490	EQ963472	+	1928248–1928799		Putative uncharacterized protein [Source:UniProtKB/TrEMBL;Acc:B8MY12]
CADAFLAG00000732	AFLA_079500	EQ963472	+	1929684-1930682	1929503-1931093	Xylosidase, putative [Source:UniProtKB/TrEMBL;Acc:B8MY13]
CADAFLAG00000733	AFLA_079510	EQ963472	-	1930791-1932862	1930594-1932999	MFS transporter, putative [Source:UniProtKB/TrEMBL;Acc:B8MY14]
CADAFLAG00000734	AFLA_079520	EQ963472	+	1934303–1935717		Putative uncharacterized protein [Source:UniProtKB/TrEMBL;Acc:B8MY15]
CADAFLAG00000735	AFLA_079530	EQ963472	+	1936289–1936924		Putative uncharacterized protein [Source:UniProtKB/TrEMBL;Acc:B8MY16]
CADAFLAG00000736	AFLA_079540	EQ963472	-	1937291-1940356	1937128-1941872	Putative uncharacterized protein [Source:UniProtKB/TrEMBL;Acc:B8MY17]
CADAFLAG00000737	AFLA_079550	EQ963472	+	1943173–1944952		Group II pyridoxal-5-phosphate decarboxylase, putative [Source:UniProtKB/TrEMBL;Acc:B8MY18]
CADAFLAG00000738	AFLA_079560	EQ963472	+	1946140-1947818	1945675-1947818	Putative uncharacterized protein [Source:UniProtKB/TrEMBL;Acc:B8MY19]
CADAFLAG00000739	AFLA_079570	EQ963472	-	1948219–1949766		Seryl-tRNA synthetase [Source:UniProtKB/TrEMBL;Acc:B8MY20]
CADAFLAG00000740	AFLA_079580	EQ963472	-	1950145-1951051	1949972-1953605	Cytochrome b561, putative [Source:UniProtKB/TrEMBL;Acc:B8MY21]
CADAFLAG00000741	AFLA_079590	EQ963472	-	1951384–1951794		Putative uncharacterized protein [Source:UniProtKB/TrEMBL;Acc:B8MY22]
CADAFLAG00000742	AFLA_079600	EQ963472	-	1952171–1953380		Acyl-CoA:6-aminopenicillanic-acid-acyltransferase, putative [Source:UniProtKB/TrEMBL;Acc:B8MY23]
CADAFLAG00000743	AFLA_079610	EQ963472	-	1955210–1955711		Putative uncharacterized protein [Source:UniProtKB/TrEMBL;Acc:B8MY24]
CADAFLAG00000744	AFLA_079620	EQ963472	+	1960862–1961253		Putative uncharacterized protein [Source:UniProtKB/TrEMBL;Acc:B8MY25]
CADAFLAG00000745	AFLA_079630	EQ963472	+	1961829–1962392		Putative uncharacterized protein [Source:UniProtKB/TrEMBL;Acc:B8MY26]
CADAFLAG00000746	AFLA_079640	EQ963472	-	1964833-1972181	1964542-1972520	Sensor histidine kinase/response regulator, putative [Source:UniProtKB/TrEMBL;Acc:B8MY27]
CADAFLAG00000747	AFLA_079650	EQ963472	+	1976430-1982392	1975832-1983185	Sensor histidine kinase/response regulator, putative [Source:UniProtKB/TrEMBL;Acc:B8MY28]
CADAFLAG00000748	AFLA_079660	EQ963472	+	1987498-1988368	1987181-1988666	Putative uncharacterized protein [Source:UniProtKB/TrEMBL;Acc:B8MY29]
CADAFLAG00000749	AFLA_079670	EQ963472	-	1990166–1990644		Putative uncharacterized protein [Source:UniProtKB/TrEMBL;Acc:B8MY30]
CADAFLAG00000750	AFLA_079680	EQ963472	-	1990995–1993641		Vesicular fusion ATPase, putative [Source:UniProtKB/TrEMBL;Acc:B8MY31]
CADAFLAG00000751	AFLA_079690	EQ963472	+	1993996–1995298		Putative uncharacterized protein [Source:UniProtKB/TrEMBL;Acc:B8MY32]
CADAFLAG00000752	AFLA_079700	EQ963472	-	1995415-1997315	1995333-1997496	Protein arginine methyltransferase RmtB [Source:UniProtKB/TrEMBL;Acc:B8MY33]
CADAFLAG00000753	AFLA_079710	EQ963472	+	1997872-1999318	1997672-2000152	Conidiophore development protein HymA [Source:UniProtKB/TrEMBL;Acc:B8MY34]
CADAFLAG00000754	AFLA_079720	EQ963472	+	2000832-2003315	2000285-2004974	TBC domain protein, putative [Source:UniProtKB/TrEMBL;Acc:B8MY35]
CADAFLAG00000755	AFLA_079730	EQ963472	-	2004886-2006442	2003217-2006926	Putative uncharacterized protein [Source:UniProtKB/TrEMBL;Acc:B8MY36]
CADAFLAG00000756	AFLA_079740	EQ963472	-	2008342-2011252	2007968-2011252	DIL and Ankyrin domain protein [Source:UniProtKB/TrEMBL;Acc:B8MY37]
CADAFLAG00000757	AFLA_079750	EQ963472	-	2012012-2017113	2010711-2017722	Guanine nucleotide exchange factor, putative [Source:UniProtKB/TrEMBL;Acc:B8MY38]
CADAFLAG00000758	AFLA_079760	EQ963472	+	2018374–2018550		Putative uncharacterized protein [Source:UniProtKB/TrEMBL;Acc:B8MY39]
CADAFLAG00000759	AFLA_079770	EQ963472	-	2020447-2022751	2020413-2022753	Endothelin-converting enzyme [Source:UniProtKB/TrEMBL;Acc:B8MY40]
CADAFLAG00000760	AFLA_079780	EQ963472	+	2029375-2030698	2027960-2031432	G protein complex alpha subunit GanA [Source:UniProtKB/TrEMBL;Acc:B8MY41]
CADAFLAG00000761	AFLA_079790	EQ963472	+	2031753-2032328	2031690-2034004	Putative uncharacterized protein [Source:UniProtKB/TrEMBL;Acc:B8MY42]
CADAFLAG00000762	AFLA_079800	EQ963472	+	2032358–2032885		Putative uncharacterized protein [Source:UniProtKB/TrEMBL;Acc:B8MY43]
CADAFLAG00000763	AFLA_079810	EQ963472	-	2033881-2035050	2033457-2037213	Vacuolar ATP synthase 16 kDa proteolipid subunit, putative [Source:UniProtKB/TrEMBL;Acc:B8MY44]
CADAFLAG00000764	AFLA_079820	EQ963472	-	2035202–2036905		Putative uncharacterized protein [Source:UniProtKB/TrEMBL;Acc:B8MY45]
CADAFLAG00000765	AFLA_079830	EQ963472	+	2038917-2039292	2038625-2039975	Stress response RCI peptide, putative [Source:UniProtKB/TrEMBL;Acc:B8MY46]
CADAFLAG00000766	AFLA_079840	EQ963472	+	2042499-2043848	2041286-2044779	Putative uncharacterized protein [Source:UniProtKB/TrEMBL;Acc:B8MY47]
CADAFLAG00000767	AFLA_079850	EQ963472	+	2046102-2047521	2044897-2047884	Phosphatidyl synthase [Source:UniProtKB/TrEMBL;Acc:B8MY48]
CADAFLAG00000768	AFLA_079860	EQ963472	-	2048594-2050104	2048594-2050580	Lipase/serine esterase, putative [Source:UniProtKB/TrEMBL;Acc:B8MY49]
CADAFLAG00000769	AFLA_079870	EQ963472	+	2051347-2053344	2051017-2054508	RNA exonuclease Rex3, putative [Source:UniProtKB/TrEMBL;Acc:B8MY50]
CADAFLAG00000770	AFLA_079880	EQ963472	-	2053751-2054403	2053447-2054529	60S ribosomal protein L22, putative [Source:UniProtKB/TrEMBL;Acc:B8MY51]
CADAFLAG00000771	AFLA_079890	EQ963472	+	2055203-2056007	2055070-2056007	Pre-mRNA splicing factor Dim1 [Source:UniProtKB/TrEMBL;Acc:B8MY52]
CADAFLAG00000772	AFLA_079900	EQ963472	+	2056798–2058247		Recombination hotspot-binding protein (Translin), putative [Source:UniProtKB/TrEMBL;Acc:B8MY53]
CADAFLAG00000773	AFLA_079910	EQ963472	-	2058339-2059192	2057784-2059394	Glutathione peroxidase [Source:UniProtKB/TrEMBL;Acc:B8MY54]
CADAFLAG00000774	AFLA_079920	EQ963472	+	2061521-2062017	2060573-2062032	Putative uncharacterized protein [Source:UniProtKB/TrEMBL;Acc:B8MY55]
CADAFLAG00000775	AFLA_079930	EQ963472	-	2062048–2064609		Beta-mannosidase, putative [Source:UniProtKB/TrEMBL;Acc:B8MY56]
CADAFLAG00000776	AFLA_079940	EQ963472	+	2064725–2064995		Putative uncharacterized protein [Source:UniProtKB/TrEMBL;Acc:B8MY57]
CADAFLAG00000777	AFLA_079950	EQ963472	-	2065383-2067048	2065332-2067048	Cytochrome B2, putative [Source:UniProtKB/TrEMBL;Acc:B8MY58]
CADAFLAG00000778	AFLA_079960	EQ963472	+	2067547-2069529	2067330-2069529	Sugar transporter, putative [Source:UniProtKB/TrEMBL;Acc:B8MY59]
CADAFLAG00000779	AFLA_079970	EQ963472	-	2069667-2070888	2069033-2071173	Putative uncharacterized protein [Source:UniProtKB/TrEMBL;Acc:B8MY60]
CADAFLAG00000780	AFLA_079980	EQ963472	-	2073002–2073451		Putative uncharacterized protein [Source:UniProtKB/TrEMBL;Acc:B8MY61]
CADAFLAG00000781	AFLA_079990	EQ963472	+	2073923–2074420		Putative uncharacterized protein [Source:UniProtKB/TrEMBL;Acc:B8MY62]
CADAFLAG00000782	AFLA_080000	EQ963472	-	2074942–2076330		DnaJ domain protein [Source:UniProtKB/TrEMBL;Acc:B8MY63]
CADAFLAG00000783	AFLA_080010	EQ963472	-	2076415–2076877		Putative uncharacterized protein [Source:UniProtKB/TrEMBL;Acc:B8MY64]
CADAFLAG00000784	AFLA_080020	EQ963472	-	2077201-2078611	2076415-2078616	ATP synthase subunit gamma [Source:UniProtKB/TrEMBL;Acc:B8MY65]
CADAFLAG00000785	AFLA_080030	EQ963472	+	2079244-2082318	2078971-2082651	Topoisomerase I [Source:UniProtKB/TrEMBL;Acc:B8MY66]
CADAFLAG00000786	AFLA_080040	EQ963472	-	2083977-2085263	2083098-2085602	Epimerase/dehydratase family protein, putative [Source:UniProtKB/TrEMBL;Acc:B8MY67]
CADAFLAG00000787	AFLA_080050	EQ963472	-	2087386–2088236		Putative uncharacterized protein [Source:UniProtKB/TrEMBL;Acc:B8MY68]
CADAFLAG00000788	AFLA_080060	EQ963472	-	2088344–2089079		Putative uncharacterized protein [Source:UniProtKB/TrEMBL;Acc:B8MY69]
CADAFLAG00000789	AFLA_080070	EQ963472	-	2089364-2090775	2083098-2090863	Putative uncharacterized protein [Source:UniProtKB/TrEMBL;Acc:B8MY70]
CADAFLAG00000790	AFLA_080080	EQ963472	-	2091187-2093983	2090988-2094965	Calpain-like protease PalBory [Source:UniProtKB/TrEMBL;Acc:B8MY71]
CADAFLAG00000791	AFLA_080090	EQ963472	+	2094792-2095974	2093762-2096358	Peroxisomal carrier protein, putative [Source:UniProtKB/TrEMBL;Acc:B8MY72]
CADAFLAG00000792	AFLA_080100	EQ963472	+	2096574-2097469	2096510-2097469	Probable endonuclease lcl3 [Source:UniProtKB/Swiss-Prot;Acc:B8MY73]
CADAFLAG00000793	AFLA_080110	EQ963472	-	2097862-2098625	2097862-2098836	Adenylate kinase 2 [Source:UniProtKB/TrEMBL;Acc:B8MY74]
CADAFLAG00000794	AFLA_080120	EQ963472	+	2099334-2100939	2098410-2101341	DNA primase large subunit [Source:UniProtKB/TrEMBL;Acc:B8MY75]
CADAFLAG00000795	AFLA_080130	EQ963472	+	2101658-2104432	2098896-2104467	Protein transport protein Sec23, putative [Source:UniProtKB/TrEMBL;Acc:B8MY76]
CADAFLAG00000796	AFLA_080140	EQ963472	+	2104572–2105287		60S ribosomal protein L12 [Source:UniProtKB/TrEMBL;Acc:B8MY77]
CADAFLAG00000797	AFLA_080150	EQ963472	+	2105351–2105649		Putative uncharacterized protein [Source:UniProtKB/TrEMBL;Acc:B8MY78]
CADAFLAG00000798	AFLA_080160	EQ963472	+	2109712-2114778	2107307-2115275	UDP-N-acetylglucosaminyltransferase [Source:UniProtKB/TrEMBL;Acc:B8MY79]
CADAFLAG00000799	AFLA_080170	EQ963472	-	2127628-2128599	2127119-2129191	MYB family conidiophore development protein FlbD, putative [Source:UniProtKB/TrEMBL;Acc:B8MY80]
CADAFLAG00000800	AFLA_080180	EQ963472	+	2131659–2132145		Putative uncharacterized protein [Source:UniProtKB/TrEMBL;Acc:B8MY81]
CADAFLAG00000801	AFLA_080190	EQ963472	+	2138645-2138941	2138187-2139629	Putative uncharacterized protein [Source:UniProtKB/TrEMBL;Acc:B8MY82]
CADAFLAG00000802	AFLA_080200	EQ963472	-	2139993-2142021	2139846-2142347	Glycosyl hydrolase, putative [Source:UniProtKB/TrEMBL;Acc:B8MY83]
CADAFLAG00000803	AFLA_080210	EQ963472	+	2143140-2144839	2143059-2144839	Sugar transporter, putative [Source:UniProtKB/TrEMBL;Acc:B8MY84]
CADAFLAG00000804	AFLA_080220	EQ963472	+	2145197-2146677	2145079-2146959	Putative uncharacterized protein [Source:UniProtKB/TrEMBL;Acc:B8MY85]
CADAFLAG00000805	AFLA_080230	EQ963472	-	2148002-2149822	2148002-2149946	60S ribosomal protein L29, putative [Source:UniProtKB/TrEMBL;Acc:B8MY86]
CADAFLAG00000806	AFLA_080240	EQ963472	+	2150666-2151679	2150644-2151787	ATP synthase delta chain, mitochondrial, putative [Source:UniProtKB/TrEMBL;Acc:B8MY87]
CADAFLAG00000807	AFLA_080250	EQ963472	-	2152736-2154616	2151794-2155680	Putative uncharacterized protein [Source:UniProtKB/TrEMBL;Acc:B8MY88]
CADAFLAG00000808	AFLA_080260	EQ963472	+	2156128-2157238	2155720-2157515	L-cystine transporter, putative [Source:UniProtKB/TrEMBL;Acc:B8MY89]
CADAFLAG00000809	AFLA_080270	EQ963472	+	2159309-2160252	2158280-2161020	C2H2 transcription factor, putative [Source:UniProtKB/TrEMBL;Acc:B8MY90]
CADAFLAG00000810	AFLA_080280	EQ963472	-	2167809-2169021	2167809-2169151	Phosphotransferase enzyme family domain protein [Source:UniProtKB/TrEMBL;Acc:B8MY91]
CADAFLAG00000811	AFLA_080290	EQ963472	+	2169476–2170413		DUTPase (Dut), putative [Source:UniProtKB/TrEMBL;Acc:B8MY92]
CADAFLAG00000812	AFLA_080300	EQ963472	-	2170698–2171887		Pyridoxal kinase, putative [Source:UniProtKB/TrEMBL;Acc:B8MY93]
CADAFLAG00000813	AFLA_080310	EQ963472	+	2173211–2173887		Putative uncharacterized protein [Source:UniProtKB/TrEMBL;Acc:B8MY94]
CADAFLAG00000814	AFLA_080320	EQ963472	+	2175037-2176218	2174663-2176950	Putative uncharacterized protein [Source:UniProtKB/TrEMBL;Acc:B8MY95]
CADAFLAG00000815	AFLA_080330	EQ963472	-	2176854-2179311	2176122-2179777	Putative uncharacterized protein [Source:UniProtKB/TrEMBL;Acc:B8MY96]
CADAFLAG00000816	AFLA_080340	EQ963472	+	2180414–2181167		Calmodulin, putative [Source:UniProtKB/TrEMBL;Acc:B8MY97]
CADAFLAG00000817	AFLA_080350	EQ963472	+	2181794-2183389	2179213-2183773	Mitotic check point protein (Bub2), putative [Source:UniProtKB/TrEMBL;Acc:B8MY98]
CADAFLAG00000818	AFLA_080360	EQ963472	-	2184195–2185016		RNA binding protein [Source:UniProtKB/TrEMBL;Acc:B8MY99]
CADAFLAG00000819	AFLA_080370	EQ963472	-	2185102-2185642	2183900-2187618	RNA binding protein [Source:UniProtKB/TrEMBL;Acc:B8MYA0]
CADAFLAG00000820	AFLA_080380	EQ963472	-	2191144-2192339	2190085-2192339	Putative uncharacterized protein [Source:UniProtKB/TrEMBL;Acc:B8MYA1]
CADAFLAG00000821	AFLA_080390	EQ963472	+	2194851-2195651	2194074-2196233	6-phosphogluconolactonase, putative [Source:UniProtKB/TrEMBL;Acc:B8MYA2]
CADAFLAG00000822	AFLA_080400	EQ963472	+	2196906-2198215	2196349-2204228	Putative uncharacterized protein [Source:UniProtKB/TrEMBL;Acc:B8MYA3]
CADAFLAG00000823	AFLA_080410	EQ963472	+	2200215-2203486	2200916-2203773	WD repeat-containing protein [Source:UniProtKB/TrEMBL;Acc:B8MYA4]
CADAFLAG00000824	AFLA_080420	EQ963472	+	2204890–2205216		Putative uncharacterized protein [Source:UniProtKB/TrEMBL;Acc:B8MYA5]
CADAFLAG00000825	AFLA_080430	EQ963472	+	2207235–2208058		Putative uncharacterized protein [Source:UniProtKB/TrEMBL;Acc:B8MYA6]
CADAFLAG00000826	AFLA_080440	EQ963472	+	2209112-2210797	2208879-2211265	MYND domain protein, putative [Source:UniProtKB/TrEMBL;Acc:B8MYA7]
CADAFLAG00000827	AFLA_080450	EQ963472	-	2211167-2213806	2210706-2213885	Cell cycle control protein (Cwf22), putative [Source:UniProtKB/TrEMBL;Acc:B8MYA8]
CADAFLAG00000828	AFLA_080460	EQ963472	+	2214033-2214832	2214013-2219997	Dolichol phosphate-mannose biosynthesis regulatory protein Dpm2 [Source:UniProtKB/TrEMBL;Acc:B8MYA9]
CADAFLAG00000829	AFLA_080470	EQ963472	+	2216157–2219489		Putative uncharacterized protein [Source:UniProtKB/TrEMBL;Acc:B8MYB0]
CADAFLAG00000830	AFLA_080480	EQ963472	-	2219899-2220666	2219394-2220743	HD superfamily hydrolase, putative [Source:UniProtKB/TrEMBL;Acc:B8MYB1]
CADAFLAG00000831	AFLA_080490	EQ963472	-	2221246–2230534		Polyketide synthase, putative [Source:UniProtKB/TrEMBL;Acc:B8MYB2]
CADAFLAG00000832	AFLA_080500	EQ963472	-	2230848–2233858		Cation-transporting ATPase, putative [Source:UniProtKB/TrEMBL;Acc:B8MYB3]
CADAFLAG00000833	AFLA_080510	EQ963472	+	2236506–2237879		Putative uncharacterized protein [Source:UniProtKB/TrEMBL;Acc:B8MYB4]
CADAFLAG00000834	AFLA_080520	EQ963472	+	2238432-2239690	2238432-2239921	ADP-ribosylglycohydrolase family protein [Source:UniProtKB/TrEMBL;Acc:B8MYB5]
CADAFLAG00000835	AFLA_080530	EQ963472	-	2240435–2241159		Putative uncharacterized protein [Source:UniProtKB/TrEMBL;Acc:B8MYB6]
CADAFLAG00000836	AFLA_080540	EQ963472	+	2242379–2245768		DEAD box helicase Mph1, putative [Source:UniProtKB/TrEMBL;Acc:B8MYB7]
CADAFLAG00000837	AFLA_080550	EQ963472	+	2246302-2247725	2242379-2247725	Putative uncharacterized protein [Source:UniProtKB/TrEMBL;Acc:B8MYB8]
CADAFLAG00000838	AFLA_080560	EQ963472	+	2248842–2251200		Putative uncharacterized protein [Source:UniProtKB/TrEMBL;Acc:B8MYB9]
CADAFLAG00000839	AFLA_080570	EQ963472	+	2252345-2253521	2252269-2253521	F-actin capping protein beta subunit [Source:UniProtKB/TrEMBL;Acc:B8MYC0]
CADAFLAG00000840	AFLA_080580	EQ963472	-	2253926–2254538		Putative uncharacterized protein [Source:UniProtKB/TrEMBL;Acc:B8MYC1]
CADAFLAG00000841	AFLA_080590	EQ963472	+	2254844–2257539		Transcription initiation factor TFIID subunit, putative [Source:UniProtKB/TrEMBL;Acc:B8MYC2]
CADAFLAG00000842	AFLA_080600	EQ963472	-	2258035-2259570	2257442-2259869	Protein phosphatase methylesterase 1 [Source:UniProtKB/TrEMBL;Acc:B8MYC3]
CADAFLAG00000843	AFLA_080610	EQ963472	+	2260644–2262318		Mitochondrial integral membrane protein [Source:UniProtKB/TrEMBL;Acc:B8MYC4]
CADAFLAG00000844	AFLA_080620	EQ963472	-	2262680-2265121	2262680-2265310	Endoplasmic reticulum and nuclear membrane proteinc Npl4, putative [Source:UniProtKB/TrEMBL;Acc:B8MYC5]
CADAFLAG00000845	AFLA_080630	EQ963472	-	2265985-2266770	2265706-2266944	NADH-quinone oxidoreductase Pst2, putative [Source:UniProtKB/TrEMBL;Acc:B8MYC6]
CADAFLAG00000846	AFLA_080640	EQ963472	-	2267662–2268429		mRNA cleavage and polyadenylation specificity factor complex subunit [Source:UniProtKB/TrEMBL;Acc:B8MYC7]
CADAFLAG00000847	AFLA_080650	EQ963472	+	2271453-2273240	2271074-2273277	Class V chitinase, putative [Source:UniProtKB/TrEMBL;Acc:B8MYC8]
CADAFLAG00000848	AFLA_080660	EQ963472	-	2273687–2274984		L-asparaginase [Source:UniProtKB/TrEMBL;Acc:B8MYC9]
CADAFLAG00000849	AFLA_080670	EQ963472	-	2276983-2278983	2273610-2283782	Putative uncharacterized protein [Source:UniProtKB/TrEMBL;Acc:B8MYD0]
CADAFLAG00000850	AFLA_080690	EQ963472	-	2279162–2279435		Putative uncharacterized protein [Source:UniProtKB/TrEMBL;Acc:B8MYD1]
CADAFLAG00000851	AFLA_080700	EQ963472	-	2280763–2283075		Cell cycle inhibitor Nif1, putative [Source:UniProtKB/TrEMBL;Acc:B8MYD2]
CADAFLAG00000852	AFLA_080710	EQ963472	+	2285886-2286807	2284600-2286807	Putative uncharacterized protein [Source:UniProtKB/TrEMBL;Acc:B8MYD3]
CADAFLAG00000853	AFLA_080720	EQ963472	-	2287063–2288654		Putative uncharacterized protein [Source:UniProtKB/TrEMBL;Acc:B8MYD4]
CADAFLAG00000854	AFLA_080730	EQ963472	+	2289441–2290729		Zinc metallopeptidase, putative [Source:UniProtKB/TrEMBL;Acc:B8MYD5]
CADAFLAG00000855	AFLA_080740	EQ963472	-	2291780-2294745	2291082-2294785	Small nucleolar ribonucleoprotein complex subunit Dip2, putative [Source:UniProtKB/TrEMBL;Acc:B8MYD6]
CADAFLAG00000856	AFLA_080750	EQ963472	+	2295061-2296250	2294946-2296275	ARP2/3 complex 34 kDa subunit , putative [Source:UniProtKB/TrEMBL;Acc:B8MYD7]
CADAFLAG00000857	AFLA_080760	EQ963472	-	2296592–2298325		TPR domain protein [Source:UniProtKB/TrEMBL;Acc:B8MYD8]
CADAFLAG00000858	AFLA_080770	EQ963472	-	2300314–2301372		2-nitropropane dioxygenase, putative [Source:UniProtKB/TrEMBL;Acc:B8MYD9]
CADAFLAG00000859	AFLA_080780	EQ963472	+	2302128-2304472	2301867-2304700	Putative uncharacterized protein [Source:UniProtKB/TrEMBL;Acc:B8MYE0]
CADAFLAG00000860	AFLA_080790	EQ963472	+	2305016-2306749	2304793-2308027	TPR domain protein [Source:UniProtKB/TrEMBL;Acc:B8MYE1]
CADAFLAG00000861	AFLA_080800	EQ963472	+	2309663-2310402	2308113-2310402	F-box domain protein [Source:UniProtKB/TrEMBL;Acc:B8MYE2]
CADAFLAG00000862	AFLA_080810	EQ963472	+	2311770-2313091	2310944-2313091	Putative uncharacterized protein [Source:UniProtKB/TrEMBL;Acc:B8MYE3]
CADAFLAG00000863	AFLA_080820	EQ963472	+	2313688-2315001	2313417-2317160	Protein phosphatase 2C, putative [Source:UniProtKB/TrEMBL;Acc:B8MYE4]
CADAFLAG00000864	AFLA_080830	EQ963472	+	2315663–2316751		rRNA processing protein, putative [Source:UniProtKB/TrEMBL;Acc:B8MYE5]
CADAFLAG00000865	AFLA_080840	EQ963472	-	2317068–2317414		Putative uncharacterized protein [Source:UniProtKB/TrEMBL;Acc:B8MYE6]
CADAFLAG00000866	AFLA_080850	EQ963472	+	2317866–2319538		rRNA processing protein Pwp1, putative [Source:UniProtKB/TrEMBL;Acc:B8MYE7]
CADAFLAG00000867	AFLA_080860	EQ963472	+	2322320–2323072		Putative uncharacterized protein [Source:UniProtKB/TrEMBL;Acc:B8MYE8]
CADAFLAG00000868	AFLA_080870	EQ963472	+	2323944–2326049		RNA polymerase I specific transcription initiation factor RRN3 [Source:UniProtKB/TrEMBL;Acc:B8MYE9]
CADAFLAG00000869	AFLA_080880	EQ963472	+	2328497-2329429	2328497-2329757	2-heptaprenyl-1,4-naphthoquinone methyltransferase, putative [Source:UniProtKB/TrEMBL;Acc:B8MYF0]
CADAFLAG00000870	AFLA_080890	EQ963472	-	2329659-2330672	2329361-2331104	Lipase, putative [Source:UniProtKB/TrEMBL;Acc:B8MYF1]
CADAFLAG00000871	AFLA_080900	EQ963472	+	2331516-2334380	2330579-2334840	Aspartyl-tRNA synthetase, cytoplasmic [Source:UniProtKB/TrEMBL;Acc:B8MYF2]
CADAFLAG00000872	AFLA_080910	EQ963472	-	2334755-2335549	2334282-2335810	Putative uncharacterized protein [Source:UniProtKB/TrEMBL;Acc:B8MYF3]
CADAFLAG00000873	AFLA_080920	EQ963472	+	2336396-2338089	2336036-2338391	Tubulin alpha-1 subunit [Source:UniProtKB/TrEMBL;Acc:B8MYF4]
CADAFLAG00000874	AFLA_080930	EQ963472	+	2338957-2343386	2338635-2343637	EF hand domain protein [Source:UniProtKB/TrEMBL;Acc:B8MYF5]
CADAFLAG00000875	AFLA_080940	EQ963472	-	2343882–2346900		P-type ATPase, putative [Source:UniProtKB/TrEMBL;Acc:B8MYF6]
CADAFLAG00000876	AFLA_080950	EQ963472	+	2348162-2350164	2347788-2350305	Putative uncharacterized protein [Source:UniProtKB/TrEMBL;Acc:B8MYF7]
CADAFLAG00000877	AFLA_080960	EQ963472	-	2350263-2352028	2350263-2352072	Origin recognition complex subunit Orc5, putative [Source:UniProtKB/TrEMBL;Acc:B8MYF8]
CADAFLAG00000878	AFLA_080970	EQ963472	-	2353015-2356572	2352254-2356787	RNA-binding protein, putative [Source:UniProtKB/TrEMBL;Acc:B8MYF9]
CADAFLAG00000879	AFLA_080980	EQ963472	-	2363655-2365050	2363318-2365489	Putative uncharacterized protein [Source:UniProtKB/TrEMBL;Acc:B8MYG0]
CADAFLAG00000880	AFLA_080990	EQ963472	+	2365850–2367503		MFS sugar transporter, putative [Source:UniProtKB/TrEMBL;Acc:B8MYG1]
CADAFLAG00000881	AFLA_081000	EQ963472	+	2367867–2371655		DNA-directed RNA polymerase [Source:UniProtKB/TrEMBL;Acc:B8MYG2]
CADAFLAG00000882	AFLA_081010	EQ963472	-	2372839–2373732		Indole-diterpene biosynthesis protein PaxU, putative [Source:UniProtKB/TrEMBL;Acc:B8MYG3]
CADAFLAG00000883	AFLA_081020	EQ963472	-	2374088-2375772	2373963-2375789	Ubiquitin fusion degradation protein Ufd1, putative [Source:UniProtKB/TrEMBL;Acc:B8MYG4]
CADAFLAG00000884	AFLA_081030	EQ963472	+	2376039-2377403	2375930-2377511	Putative uncharacterized protein [Source:UniProtKB/TrEMBL;Acc:B8MYG5]
CADAFLAG00000885	AFLA_081040	EQ963472	-	2377479–2379339		AAA family ATPase Rvb2/Reptin, putative [Source:UniProtKB/TrEMBL;Acc:B8MYG6]
CADAFLAG00000886	AFLA_081050	EQ963472	+	2379766-2382312	2379631-2382773	Paramyosin, putative [Source:UniProtKB/TrEMBL;Acc:B8MYG7]
CADAFLAG00000887	AFLA_081060	EQ963472	-	2382827-2383957	2382222-2383989	Alpha/beta hydrolase, putative [Source:UniProtKB/TrEMBL;Acc:B8MYG8]
CADAFLAG00000888	AFLA_081070	EQ963472	-	2385493–2385988		Putative uncharacterized protein [Source:UniProtKB/TrEMBL;Acc:B8MYG9]
CADAFLAG00000889	AFLA_081080	EQ963472	-	2386066–2386383		Putative uncharacterized protein [Source:UniProtKB/TrEMBL;Acc:B8MYH0]
CADAFLAG00000890	AFLA_081090	EQ963472	+	2386486-2387631	2386315-2387631	Fumarylacetoacetate hydrolase family protein [Source:UniProtKB/TrEMBL;Acc:B8MYH1]
CADAFLAG00000891	AFLA_081100	EQ963472	+	2388847–2389401		Putative uncharacterized protein [Source:UniProtKB/TrEMBL;Acc:B8MYH2]
CADAFLAG00000892	AFLA_081110	EQ963472	-	2390975-2392339	2390667-2392863	MFS transporter, putative [Source:UniProtKB/TrEMBL;Acc:B8MYH3]
CADAFLAG00000893	AFLA_081120	EQ963472	-	2392404–2392682		Putative uncharacterized protein [Source:UniProtKB/TrEMBL;Acc:B8MYH4]
CADAFLAG00000894	AFLA_081130	EQ963472	+	2393605-2396158	2392588-2396430	C2H2 type zinc finger domain protein [Source:UniProtKB/TrEMBL;Acc:B8MYH5]
CADAFLAG00000895	AFLA_081140	EQ963472	-	2397491-2398835	2396935-2400228	Putative uncharacterized protein [Source:UniProtKB/TrEMBL;Acc:B8MYH6]
CADAFLAG00000896	AFLA_081150	EQ963472	+	2400153-2400981	2398799-2401225	Putative uncharacterized protein [Source:UniProtKB/TrEMBL;Acc:B8MYH7]
CADAFLAG00000897	AFLA_081160	EQ963472	-	2401447–2402251		Putative uncharacterized protein [Source:UniProtKB/TrEMBL;Acc:B8MYH8]
CADAFLAG00000898	AFLA_081170	EQ963472	+	2403158–2403937		Putative uncharacterized protein [Source:UniProtKB/TrEMBL;Acc:B8MYH9]
CADAFLAG00000899	AFLA_081180	EQ963472	-	2404353–2404827		Putative uncharacterized protein [Source:UniProtKB/TrEMBL;Acc:B8MYI0]
CADAFLAG00000900	AFLA_081190	EQ963472	+	2408387-2408762	2407333-2409388	Putative uncharacterized protein [Source:UniProtKB/TrEMBL;Acc:B8MYI1]
CADAFLAG00000901	AFLA_081200	EQ963472	-	2409332-2410051	2408345-2411781	Putative uncharacterized protein [Source:UniProtKB/TrEMBL;Acc:B8MYI2]
CADAFLAG00000902	AFLA_081210	EQ963472	+	2412375-2414764	2412019-2414764	ARS binding protein Abp2, putative [Source:UniProtKB/TrEMBL;Acc:B8MYI3]
CADAFLAG00000903	AFLA_081220	EQ963472	-	2415338–2415971		Putative uncharacterized protein [Source:UniProtKB/TrEMBL;Acc:B8MYI4]
CADAFLAG00000904	AFLA_081230	EQ963472	-	2416591–2417285		Putative uncharacterized protein [Source:UniProtKB/TrEMBL;Acc:B8MYI5]
CADAFLAG00000905	AFLA_081240	EQ963472	-	2418078–2418852		Putative uncharacterized protein [Source:UniProtKB/TrEMBL;Acc:B8MYI6]
CADAFLAG00000906	AFLA_081250	EQ963472	+	2420036-2420799	2419973-2421133	Ketohexokinase, putative [Source:UniProtKB/TrEMBL;Acc:B8MYI7]
CADAFLAG00000907	AFLA_081260	EQ963472	+	2421617–2422778		60S ribosome biogenesis protein Brx1, putative [Source:UniProtKB/TrEMBL;Acc:B8MYI8]
CADAFLAG00000908	AFLA_081270	EQ963472	+	2423233-2424794	2421579-2426353	F-box domain protein [Source:UniProtKB/TrEMBL;Acc:B8MYI9]
CADAFLAG00000909	AFLA_081280	EQ963472	-	2426090-2427299	2425739-2427299	Ras GTPase Rab11, putative [Source:UniProtKB/TrEMBL;Acc:B8MYJ0]
CADAFLAG00000910	AFLA_081290	EQ963472	+	2427773–2429558		Putative uncharacterized protein [Source:UniProtKB/TrEMBL;Acc:B8MYJ1]
CADAFLAG00000911	AFLA_081300	EQ963472	+	2429605-2430929	2427773-2431406	Chromo domain protein Chp1p, putative [Source:UniProtKB/TrEMBL;Acc:B8MYJ2]
CADAFLAG00000912	AFLA_081310	EQ963472	-	2431311-2433225	2430831-2434575	ATP-dependent Clp protease, putative [Source:UniProtKB/TrEMBL;Acc:B8MYJ3]
CADAFLAG00000913	AFLA_081320	EQ963472	-	2433945–2434531		Putative uncharacterized protein [Source:UniProtKB/TrEMBL;Acc:B8MYJ4]
CADAFLAG00000914	AFLA_081330	EQ963472	+	2435053-2436641	2434573-2436956	Glycerol 3-phosphate dehydrogenase (GfdA), putative [Source:UniProtKB/TrEMBL;Acc:B8MYJ5]
CADAFLAG00000915	AFLA_081340	EQ963472	+	2437406–2442150		Glycogen debranching enzyme Gdb1, putative [Source:UniProtKB/TrEMBL;Acc:B8MYJ6]
CADAFLAG00000916	AFLA_081350	EQ963472	+	2442688-2445336	2437037-2445713	DUF221 domain protein, putative [Source:UniProtKB/TrEMBL;Acc:B8MYJ7]
CADAFLAG00000917	AFLA_081360	EQ963472	-	2448876-2450191	2448688-2450414	Phospho-2-dehydro-3-deoxyheptonate aldolase [Source:UniProtKB/TrEMBL;Acc:B8MYJ8]
CADAFLAG00000918	AFLA_081370	EQ963472	+	2455138-2456337	2454580-2457230	Putative uncharacterized protein [Source:UniProtKB/TrEMBL;Acc:B8MYJ9]
CADAFLAG00000919	AFLA_081380	EQ963472	-	2456821-2458127	2456570-2458267	Cytochrome C1/Cyt1, putative [Source:UniProtKB/TrEMBL;Acc:B8MYK0]
CADAFLAG00000920	AFLA_081390	EQ963472	-	2458670-2460347	2456570-2461057	Pachytene checkpoint component Pch2, putative [Source:UniProtKB/TrEMBL;Acc:B8MYK1]
CADAFLAG00000921	AFLA_081410	EQ963472	+	2461488-2464280	2461235-2466397	Secretion pathway protein Sls2/Rcy1, putative [Source:UniProtKB/TrEMBL;Acc:B8MYK2]
CADAFLAG00000922	AFLA_081420	EQ963472	+	2464984-2465924	2464625-2466397	Extracellular SCP domain protein Pry1, putative [Source:UniProtKB/TrEMBL;Acc:B8MYK3]
CADAFLAG00000923	AFLA_081430	EQ963472	-	2466299–2468724		Eukaryotic translation initiation factor 3 subunit B [Source:UniProtKB/TrEMBL;Acc:B8MYK4]
CADAFLAG00000924	AFLA_081440	EQ963472	+	2469367-2470837	2468856-2471018	SWIB/MDM2 domain protein [Source:UniProtKB/TrEMBL;Acc:B8MYK5]
CADAFLAG00000925	AFLA_081450	EQ963472	+	2471467-2473931	2471311-2474319	C2H2 finger domain protein, putative [Source:UniProtKB/TrEMBL;Acc:B8MYK6]
CADAFLAG00000926	AFLA_081460	EQ963472	-	2474221–2477164		DNA mismatch repair protein Msh4, putative [Source:UniProtKB/TrEMBL;Acc:B8MYK7]
CADAFLAG00000927	AFLA_081470	EQ963472	+	2477405-2479071	2477404-2479381	Ribosome biogenesis protein Rsa4, putative [Source:UniProtKB/TrEMBL;Acc:B8MYK8]
CADAFLAG00000928	AFLA_081480	EQ963472	-	2479283–2479928		IgE-binding protein [Source:UniProtKB/TrEMBL;Acc:B8MYK9]
CADAFLAG00000929	AFLA_081490	EQ963472	-	2481317-2482563	2478976-2483550	Nucleoside diphosphatase Gda1 [Source:UniProtKB/TrEMBL;Acc:B8MYL0]
CADAFLAG00000930	AFLA_081500	EQ963472	+	2489794-2490735	2489174-2491868	Putative uncharacterized protein [Source:UniProtKB/TrEMBL;Acc:B8MYL1]
CADAFLAG00000931	AFLA_081510	EQ963472	-	2491692-2492210	2490638-2493236	Putative uncharacterized protein [Source:UniProtKB/TrEMBL;Acc:B8MYL2]
CADAFLAG00000932	AFLA_081520	EQ963472	+	2493441–2493953		Putative uncharacterized protein [Source:UniProtKB/TrEMBL;Acc:B8MYL3]
CADAFLAG00000933	AFLA_081530	EQ963472	+	2494048–2494340		Putative uncharacterized protein [Source:UniProtKB/TrEMBL;Acc:B8MYL4]
CADAFLAG00000934	AFLA_081540	EQ963472	-	2495083–2496411		Integral membrane protein [Source:UniProtKB/TrEMBL;Acc:B8MYL5]
CADAFLAG00000935	AFLA_081550	EQ963472	+	2498935-2500069	2498809-2500489	Enoyl-CoA hydratase/isomerase family protein [Source:UniProtKB/TrEMBL;Acc:B8MYL6]
CADAFLAG00000936	AFLA_081560	EQ963472	-	2500406-2501213	2499974-2501440	Presequence translocase-associated motor subunit Pam17, putative [Source:UniProtKB/TrEMBL;Acc:B8MYL7]
CADAFLAG00000937	AFLA_081570	EQ963472	-	2501767–2503551		AMP dependent ligase/synthetase, putative [Source:UniProtKB/TrEMBL;Acc:B8MYL8]
CADAFLAG00000938	AFLA_081580	EQ963472	-	2503910-2505069	2501767-2505159	Putative uncharacterized protein [Source:UniProtKB/TrEMBL;Acc:B8MYL9]
CADAFLAG00000939	AFLA_081590	EQ963472	+	2505160–2505405		Putative uncharacterized protein [Source:UniProtKB/TrEMBL;Acc:B8MYM0]
CADAFLAG00000940	AFLA_081600	EQ963472	+	2506626-2508174	2505160-2508991	C6 finger domain protein, putative [Source:UniProtKB/TrEMBL;Acc:B8MYM1]
CADAFLAG00000941	AFLA_081610	EQ963472	+	2509950–2511341		Putative uncharacterized protein [Source:UniProtKB/TrEMBL;Acc:B8MYM2]
CADAFLAG00000942	AFLA_081620	EQ963472	+	2512241-2512942	2512166-2513234	Putative uncharacterized protein [Source:UniProtKB/TrEMBL;Acc:B8MYM3]
CADAFLAG00000943	AFLA_081630	EQ963472	-	2513138–2514885		Carboxyl ester lipase, zebrafish, putative [Source:UniProtKB/TrEMBL;Acc:B8MYM4]
CADAFLAG00000944	AFLA_081640	EQ963472	+	2516294–2517181		Short chain type dehydrogenase, putative [Source:UniProtKB/TrEMBL;Acc:B8MYM5]
CADAFLAG00000945	AFLA_081650	EQ963472	-	2517646-2518615	2517500-2519949	Putative uncharacterized protein [Source:UniProtKB/TrEMBL;Acc:B8MYM6]
CADAFLAG00000946	AFLA_081660	EQ963472	-	2519404–2519732		Putative uncharacterized protein [Source:UniProtKB/TrEMBL;Acc:B8MYM7]
CADAFLAG00000947	AFLA_081670	EQ963472	+	2520845-2522604	2520429-2522604	Acid phosphatase, putative [Source:UniProtKB/TrEMBL;Acc:B8MYM8]
CADAFLAG00000948	AFLA_081680	EQ963472	+	2523765–2524469		Putative uncharacterized protein [Source:UniProtKB/TrEMBL;Acc:B8MYM9]
CADAFLAG00000949	AFLA_081690	EQ963472	+	2525618-2526582	2525034-2526685	Putative uncharacterized protein [Source:UniProtKB/TrEMBL;Acc:B8MYN0]
CADAFLAG00000950	AFLA_081700	EQ963472	-	2526763–2527810		RTA1 domain protein, putative [Source:UniProtKB/TrEMBL;Acc:B8MYN1]
CADAFLAG00000951	AFLA_081710	EQ963472	-	2527954–2528506		Putative uncharacterized protein [Source:UniProtKB/TrEMBL;Acc:B8MYN2]
CADAFLAG00000952	AFLA_081720	EQ963472	+	2529595–2531919		Putative uncharacterized protein [Source:UniProtKB/TrEMBL;Acc:B8MYN3]
CADAFLAG00000953	AFLA_081730	EQ963472	+	2533788-2534718	2532233-2535489	Integral membrane protein [Source:UniProtKB/TrEMBL;Acc:B8MYN4]
CADAFLAG00000954	AFLA_081740	EQ963472	-	2535392-2535826	2534620-2535987	Peptidyl-prolyl cis-trans isomerase [Source:UniProtKB/TrEMBL;Acc:B8MYN5]
CADAFLAG00000955	AFLA_081750	EQ963472	+	2537554-2539608	2537554-2540028	T-complex protein 1, beta subunit, putative [Source:UniProtKB/TrEMBL;Acc:B8MYN6]
CADAFLAG00000956	AFLA_081760	EQ963472	+	2539632–2540028		Putative uncharacterized protein [Source:UniProtKB/TrEMBL;Acc:B8MYN7]
CADAFLAG00000957	AFLA_081770	EQ963472	+	2543109-2544126	2542946-2544522	Putative uncharacterized protein [Source:UniProtKB/TrEMBL;Acc:B8MYN8]
CADAFLAG00000958	AFLA_081780	EQ963472	+	2547268–2547525		Putative uncharacterized protein [Source:UniProtKB/TrEMBL;Acc:B8MYN9]
CADAFLAG00000959	AFLA_081790	EQ963472	-	2548641-2550651	2548517-2550921	Phenol 2-monooxygenase, putative [Source:UniProtKB/TrEMBL;Acc:B8MYP0]
CADAFLAG00000960	AFLA_081800	EQ963472	-	2553732–2554178		Putative uncharacterized protein [Source:UniProtKB/TrEMBL;Acc:B8MYP1]
CADAFLAG00000961	AFLA_081810	EQ963472	-	2556294-2558285	2555564-2558285	Muramidase, putative [Source:UniProtKB/TrEMBL;Acc:B8MYP2]
CADAFLAG00000962	AFLA_081820	EQ963472	+	2560005–2561545		Glycosyl hydrolase, putative [Source:UniProtKB/TrEMBL;Acc:B8MYP3]
CADAFLAG00000963	AFLA_081830	EQ963472	+	2565580–2565958		Putative uncharacterized protein [Source:UniProtKB/TrEMBL;Acc:B8MYP4]
CADAFLAG00000964	AFLA_081840	EQ963472	-	2568502–2569458		Esterase, putative [Source:UniProtKB/TrEMBL;Acc:B8MYP5]
CADAFLAG00000965	AFLA_081850	EQ963472	+	2571994-2573179	2571539-2573179	PKS-like enzyme, putative [Source:UniProtKB/TrEMBL;Acc:B8MYP6]
CADAFLAG00000966	AFLA_081860	EQ963472	+	2575242-2578727	2574858-2579193	Protein kinase and ribonuclease Ire1, putative [Source:UniProtKB/TrEMBL;Acc:B8MYP7]
CADAFLAG00000967	AFLA_081870	EQ963472	-	2579125–2582169		Conserved serine-rich protein [Source:UniProtKB/TrEMBL;Acc:B8MYP8]
CADAFLAG00000968	AFLA_081880	EQ963472	-	2582911-2584123	2582811-2584203	Branched-chain amino acid aminotransferase [Source:UniProtKB/TrEMBL;Acc:B8MYP9]
CADAFLAG00000969	AFLA_081890	EQ963472	+	2585274-2586544	2584754-2586544	Putative uncharacterized protein [Source:UniProtKB/TrEMBL;Acc:B8MYQ0]
CADAFLAG00000970	AFLA_081900	EQ963472	-	2587221-2587583	2587096-2588230	Putative uncharacterized protein [Source:UniProtKB/TrEMBL;Acc:B8MYQ1]
CADAFLAG00000971	AFLA_081910	EQ963472	-	2589535-2590441	2589293-2590441	Major allergen Asp F2 [Source:UniProtKB/TrEMBL;Acc:B8MYQ2]
CADAFLAG00000972	AFLA_081920	EQ963472	+	2591358-2593000	2591358-2595798	ZIP Zinc transporter, putative [Source:UniProtKB/TrEMBL;Acc:B8MYQ3]
CADAFLAG00000973	AFLA_081930	EQ963472	+	2593369–2594165		Putative uncharacterized protein [Source:UniProtKB/TrEMBL;Acc:B8MYQ4]
CADAFLAG00000974	AFLA_081940	EQ963472	+	2594701–2595548		Acetyltransferase, GNAT family [Source:UniProtKB/TrEMBL;Acc:B8MYQ5]
CADAFLAG00000975	AFLA_081950	EQ963472	-	2596223-2597833	2596223-2598042	Monooxygenase, putative [Source:UniProtKB/TrEMBL;Acc:B8MYQ6]
CADAFLAG00000976	AFLA_081960	EQ963472	-	2597836–2598042		Putative uncharacterized protein [Source:UniProtKB/TrEMBL;Acc:B8MYQ7]
CADAFLAG00000977	AFLA_081970	EQ963472	+	2600011–2601781		Putative uncharacterized protein [Source:UniProtKB/TrEMBL;Acc:B8MYQ8]
CADAFLAG00000978	AFLA_081980	EQ963472	+	2602798–2603847		Ferulic acid esterase (FaeA), putative [Source:UniProtKB/TrEMBL;Acc:B8MYQ9]
CADAFLAG00000979	AFLA_081990	EQ963472	+	2604552–2605727		Putative uncharacterized protein [Source:UniProtKB/TrEMBL;Acc:B8MYR0]
CADAFLAG00000980	AFLA_082000	EQ963472	-	2606005–2606594		Putative uncharacterized protein [Source:UniProtKB/TrEMBL;Acc:B8MYR1]
CADAFLAG00000981	AFLA_082010	EQ963472	+	2608647–2608981		Putative uncharacterized protein [Source:UniProtKB/TrEMBL;Acc:B8MYR2]
CADAFLAG00000982	AFLA_082020	EQ963472	+	2610733-2611410	2608551-2613096	Putative uncharacterized protein [Source:UniProtKB/TrEMBL;Acc:B8MYR3]
CADAFLAG00000983	AFLA_082030	EQ963472	+	2611557–2612339		Putative uncharacterized protein [Source:UniProtKB/TrEMBL;Acc:B8MYR4]
CADAFLAG00000984	AFLA_082040	EQ963472	+	2613734–2614299		DUF614 domain protein [Source:UniProtKB/TrEMBL;Acc:B8MYR5]
CADAFLAG00000985	AFLA_082050	EQ963472	-	2614448–2616519		Epimerase/dehydratase family protein, putative [Source:UniProtKB/TrEMBL;Acc:B8MYR6]
CADAFLAG00000986	AFLA_082060	EQ963472	-	2616683–2617712		Putative uncharacterized protein [Source:UniProtKB/TrEMBL;Acc:B8MYR7]
CADAFLAG00000987	AFLA_082070	EQ963472	-	2618307–2619851		Pantothenate transporter, putative [Source:UniProtKB/TrEMBL;Acc:B8MYR8]
CADAFLAG00000988	AFLA_082080	EQ963472	+	2620369-2621429	2620261-2621615	Alpha/beta hydrolase, putative [Source:UniProtKB/TrEMBL;Acc:B8MYR9]
CADAFLAG00000989	AFLA_082090	EQ963472	-	2621517-2623572	2620511-2623820	Putative uncharacterized protein [Source:UniProtKB/TrEMBL;Acc:B8MYS0]
CADAFLAG00000990	AFLA_082100	EQ963472	+	2624063–2627985		Putative uncharacterized protein [Source:UniProtKB/TrEMBL;Acc:B8MYS1]
CADAFLAG00000991	AFLA_082110	EQ963472	+	2628876-2632862	2628273-2636231	Wd40 protein, putative [Source:UniProtKB/TrEMBL;Acc:B8MYS2]
CADAFLAG00000992	AFLA_082120	EQ963472	+	2637608–2638001		Putative uncharacterized protein [Source:UniProtKB/TrEMBL;Acc:B8MYS3]
CADAFLAG00000993	AFLA_082130	EQ963472	-	2638672–2638974		Putative uncharacterized protein [Source:UniProtKB/TrEMBL;Acc:B8MYS4]
CADAFLAG00000994	AFLA_082140	EQ963472	-	2642293–2642633		Putative uncharacterized protein [Source:UniProtKB/TrEMBL;Acc:B8MYS5]
CADAFLAG00000995	AFLA_082150	EQ963472	+	2646293–2652837		Polyketide synthase, putative [Source:UniProtKB/TrEMBL;Acc:B8MYS6]
CADAFLAG00000996	AFLA_082160	EQ963472	-	2653373-2655374	2653124-2656171	MFS glucose transporter, putative [Source:UniProtKB/TrEMBL;Acc:B8MYS7]
CADAFLAG00000997	AFLA_082170	EQ963472	-	2656834-2658105	2656834-2658424	Efflux pump antibiotic resistance protein, putative [Source:UniProtKB/TrEMBL;Acc:B8MYS8]
CADAFLAG00000998	AFLA_082180	EQ963472	-	2658155–2658424		Putative uncharacterized protein [Source:UniProtKB/TrEMBL;Acc:B8MYS9]
CADAFLAG00000999	AFLA_082190	EQ963472	-	2659280–2660107		Putative uncharacterized protein [Source:UniProtKB/TrEMBL;Acc:B8MYT0]
CADAFLAG00001000	AFLA_082200	EQ963472	-	2660638–2662665		AAA family ATPase, putative [Source:UniProtKB/TrEMBL;Acc:B8MYT1]
CADAFLAG00001001	AFLA_082210	EQ963472	-	2663441–2664514		Putative uncharacterized protein [Source:UniProtKB/TrEMBL;Acc:B8MYT2]
CADAFLAG00001002	AFLA_082220	EQ963472	+	2664797-2666551	2664445-2666953	Short-chain dehydrogenase, putative [Source:UniProtKB/TrEMBL;Acc:B8MYT3]
CADAFLAG00001003	AFLA_082230	EQ963472	-	2666670-2668353	2666561-2668516	Pantothenate transporter, putative [Source:UniProtKB/TrEMBL;Acc:B8MYT4]
CADAFLAG00001004	AFLA_082240	EQ963472	-	2669988–2670901		Putative uncharacterized protein [Source:UniProtKB/TrEMBL;Acc:B8MYT5]
CADAFLAG00001005	AFLA_082250	EQ963472	-	2672301-2674311	2671196-2674311	GMC oxidoreductase, putative [Source:UniProtKB/TrEMBL;Acc:B8MYT6]
CADAFLAG00001006	AFLA_082260	EQ963472	-	2675009–2676454		Glycosyl transferase, putative [Source:UniProtKB/TrEMBL;Acc:B8MYT7]
CADAFLAG00001007	AFLA_082270	EQ963472	+	2677008-2679038	2676832-2679321	UDP-glucose dehydrogenase [Source:UniProtKB/TrEMBL;Acc:B8MYT8]
CADAFLAG00001008	AFLA_082280	EQ963472	-	2679227-2680129	2679227-2680544	Glutathione S-transferase, putative [Source:UniProtKB/TrEMBL;Acc:B8MYT9]
CADAFLAG00001009	AFLA_082290	EQ963472	-	2681736–2682533		Sin3-associated polypeptide Sap18, putative [Source:UniProtKB/TrEMBL;Acc:B8MYU0]
CADAFLAG00001010	AFLA_082300	EQ963472	+	2682941–2684101		mRNA splicing factor (Prp18), putative [Source:UniProtKB/TrEMBL;Acc:B8MYU1]
CADAFLAG00001011	AFLA_082310	EQ963472	-	2684323-2686050	2684025-2687085	Putative uncharacterized protein [Source:UniProtKB/TrEMBL;Acc:B8MYU2]
CADAFLAG00001012	AFLA_082320	EQ963472	+	2686886-2687694	2685831-2688040	ADP-ribosylation factor family protein [Source:UniProtKB/TrEMBL;Acc:B8MYU3]
CADAFLAG00001013	AFLA_082330	EQ963472	-	2689206-2690788	2688443-2690996	Phosphatidylinositol:UDP-GlcNAc transferase subunit PIG-A [Source:UniProtKB/TrEMBL;Acc:B8MYU4]
CADAFLAG00001014	AFLA_082340	EQ963472	+	2691203–2693815		DEAD/DEAH box helicase, putative [Source:UniProtKB/TrEMBL;Acc:B8MYU5]
CADAFLAG00001015	AFLA_082350	EQ963472	+	2695332–2695811		Putative uncharacterized protein [Source:UniProtKB/TrEMBL;Acc:B8MYU6]
CADAFLAG00001016	AFLA_082360	EQ963472	-	2697696-2698925	2697659-2698925	Putative uncharacterized protein [Source:UniProtKB/TrEMBL;Acc:B8MYU7]
CADAFLAG00001017	AFLA_082370	EQ963472	+	2701279–2701875		Putative uncharacterized protein [Source:UniProtKB/TrEMBL;Acc:B8MYU8]
CADAFLAG00001018	AFLA_082380	EQ963472	+	2702856–2703996		Alcohol dehydrogenase, putative [Source:UniProtKB/TrEMBL;Acc:B8MYU9]
CADAFLAG00001019	AFLA_082390	EQ963472	+	2709475-2711868	2709435-2711927	Probable exo-1,4-beta-xylosidase xlnD [Source:UniProtKB/Swiss-Prot;Acc:B8MYV0]
CADAFLAG00001020	AFLA_082400	EQ963472	-	2712072-2716786	2712030-2719022	ABC multidrug transporter, putative [Source:UniProtKB/TrEMBL;Acc:B8MYV1]
CADAFLAG00001021	AFLA_082410	EQ963472	-	2717312–2718542		Putative uncharacterized protein [Source:UniProtKB/TrEMBL;Acc:B8MYV2]
CADAFLAG00001022	AFLA_082420	EQ963472	+	2718976–2719365		Putative uncharacterized protein [Source:UniProtKB/TrEMBL;Acc:B8MYV3]
CADAFLAG00001023	AFLA_082430	EQ963472	+	2721452-2722705	2721335-2722725	Putative uncharacterized protein [Source:UniProtKB/TrEMBL;Acc:B8MYV4]
CADAFLAG00001024	AFLA_082440	EQ963472	+	2723068–2723992		Putative uncharacterized protein [Source:UniProtKB/TrEMBL;Acc:B8MYV5]
CADAFLAG00001025	AFLA_082450	EQ963472	-	2724533–2726036		Bicyclomycin resistance protein, putative [Source:UniProtKB/TrEMBL;Acc:B8MYV6]
CADAFLAG00001026	AFLA_082460	EQ963472	+	2726731-2727646	2726731-2728331	Putative uncharacterized protein [Source:UniProtKB/TrEMBL;Acc:B8MYV7]
CADAFLAG00001027	AFLA_082470	EQ963472	-	2728379–2730410		AMP dependent CoA ligase, putative [Source:UniProtKB/TrEMBL;Acc:B8MYV8]
CADAFLAG00001028	AFLA_082480	EQ963472	+	2730816–2732067		NRPS-like enzyme, putative [Source:UniProtKB/TrEMBL;Acc:B8MYV9]
CADAFLAG00001029	AFLA_082490	EQ963472	+	2737163-2738596	2737163-2739216	Putative uncharacterized protein [Source:UniProtKB/TrEMBL;Acc:B8MYW0]
CADAFLAG00001030	AFLA_082500	EQ963472	-	2739118-2740458	2738892-2740842	Sphinganine hydroxylase Sur2, putative [Source:UniProtKB/TrEMBL;Acc:B8MYW1]
CADAFLAG00001031	AFLA_082510	EQ963472	+	2741596-2742394	2741015-2742625	TCTP family protein [Source:UniProtKB/TrEMBL;Acc:B8MYW2]
CADAFLAG00001032	AFLA_082520	EQ963472	-	2742951-2746775	2742157-2746775	C6 transcription factor, putative [Source:UniProtKB/TrEMBL;Acc:B8MYW3]
CADAFLAG00001033	AFLA_082530	EQ963472	-	2747298–2748205		Signal recognition particle 19 kDa protein, putative [Source:UniProtKB/TrEMBL;Acc:B8MYW4]
CADAFLAG00001034	AFLA_082540	EQ963472	+	2749330-2750894	2749054-2751207	Aminotransferase, class III [Source:UniProtKB/TrEMBL;Acc:B8MYW5]
CADAFLAG00001035	AFLA_082550	EQ963472	-	2751111-2754217	2750977-2754464	Cleavage and polyadenylation specifity factor, 73 kDa subunit [Source:UniProtKB/TrEMBL;Acc:B8MYW6]
CADAFLAG00001036	AFLA_082560	EQ963472	+	2754871-2756613	2754609-2756960	Putative uncharacterized protein [Source:UniProtKB/TrEMBL;Acc:B8MYW7]
CADAFLAG00001037	AFLA_082570	EQ963472	+	2759419-2762761	2758405-2765526	Protein kinase (Lkh1), putative [Source:UniProtKB/TrEMBL;Acc:B8MYW8]
CADAFLAG00001038	AFLA_082580	EQ963472	+	2763781–2765526		Amidase family protein, putative [Source:UniProtKB/TrEMBL;Acc:B8MYW9]
CADAFLAG00001039	AFLA_082590	EQ963472	-	2767070-2768546	2767070-2768581	Mitochondrial cation transporter, putative [Source:UniProtKB/TrEMBL;Acc:B8MYX0]
CADAFLAG00001040	AFLA_082600	EQ963472	-	2769278-2771568	2768775-2772523	PHD finger domain protein [Source:UniProtKB/TrEMBL;Acc:B8MYX1]
CADAFLAG00001041	AFLA_082610	EQ963472	+	2773234–2773625		Putative uncharacterized protein [Source:UniProtKB/TrEMBL;Acc:B8MYX2]
CADAFLAG00001042	AFLA_082620	EQ963472	+	2778230-2779223	2777866-2779940	Putative uncharacterized protein [Source:UniProtKB/TrEMBL;Acc:B8MYX3]
CADAFLAG00001043	AFLA_082630	EQ963472	+	2780142-2781588	2780048-2781588	Putative uncharacterized protein [Source:UniProtKB/TrEMBL;Acc:B8MYX4]
CADAFLAG00001044	AFLA_082640	EQ963472	-	2782013–2782714		Putative uncharacterized protein [Source:UniProtKB/TrEMBL;Acc:B8MYX5]
CADAFLAG00001045	AFLA_082650	EQ963472	-	2783941–2784690		Putative uncharacterized protein [Source:UniProtKB/TrEMBL;Acc:B8MYX6]
CADAFLAG00001046	AFLA_082660	EQ963472	+	2785796–2786038		Putative uncharacterized protein [Source:UniProtKB/TrEMBL;Acc:B8MYX7]
CADAFLAG00001047	AFLA_082670	EQ963472	-	2787034–2787719		Putative uncharacterized protein [Source:UniProtKB/TrEMBL;Acc:B8MYX8]
CADAFLAG00001048	AFLA_082680	EQ963472	-	2788989-2789765	2788526-2790545	Putative uncharacterized protein [Source:UniProtKB/TrEMBL;Acc:B8MYX9]
CADAFLAG00001049	AFLA_082690	EQ963472	+	2791213–2793454		Pseudouridine synthase TruD/Pus7, putative [Source:UniProtKB/TrEMBL;Acc:B8MYY0]
CADAFLAG00001050	AFLA_082700	EQ963472	-	2794419-2795555	2794216-2796614	Putative uncharacterized protein [Source:UniProtKB/TrEMBL;Acc:B8MYY1]
CADAFLAG00001051	AFLA_082710	EQ963472	+	2797097-2798185	2796788-2798491	Putative uncharacterized protein [Source:UniProtKB/TrEMBL;Acc:B8MYY2]
CADAFLAG00001052	AFLA_082720	EQ963472	+	2799484-2801155	2799101-2802052	Fatty acid elongase (Gig30), putative [Source:UniProtKB/TrEMBL;Acc:B8MYY3]
CADAFLAG00001053	AFLA_082730	EQ963472	-	2801994-2804760	2801058-2804760	Putative uncharacterized protein [Source:UniProtKB/TrEMBL;Acc:B8MYY4]
CADAFLAG00001054	AFLA_082740	EQ963472	+	2805266–2807694		AMP dependent ligase, putative [Source:UniProtKB/TrEMBL;Acc:B8MYY5]
CADAFLAG00001055	AFLA_082750	EQ963472	-	2807879-2809571	2807804-2809701	Putative uncharacterized protein [Source:UniProtKB/TrEMBL;Acc:B8MYY6]
CADAFLAG00001056	AFLA_082760	EQ963472	-	2810080-2811793	2809857-2812309	Allantoate permease, putative [Source:UniProtKB/TrEMBL;Acc:B8MYY7]
CADAFLAG00001057	AFLA_082770	EQ963472	+	2814256–2814728		Putative uncharacterized protein [Source:UniProtKB/TrEMBL;Acc:B8MYY8]
CADAFLAG00001058	AFLA_082780	EQ963472	-	2816177–2816671		4,5-DOPA dioxygenase extRadiol, putative [Source:UniProtKB/TrEMBL;Acc:B8MYY9]
CADAFLAG00001059	AFLA_082790	EQ963472	+	2829917–2831320		Putative uncharacterized protein [Source:UniProtKB/TrEMBL;Acc:B8MYZ0]
CADAFLAG00001060	AFLA_082800	EQ963472	+	2833554-2833812	2831468-2833812	Putative uncharacterized protein [Source:UniProtKB/TrEMBL;Acc:B8MYZ1]
CADAFLAG00001061	AFLA_082810	EQ963472	+	2833892–2835217		Putative uncharacterized protein [Source:UniProtKB/TrEMBL;Acc:B8MYZ2]
CADAFLAG00001062	AFLA_082820	EQ963472	+	2835957-2838901	2835655-2838901	Putative uncharacterized protein [Source:UniProtKB/TrEMBL;Acc:B8MYZ3]
CADAFLAG00001063	AFLA_082830	EQ963472	-	2840801-2842560	2840801-2844359	Putative uncharacterized protein [Source:UniProtKB/TrEMBL;Acc:B8MYZ4]
CADAFLAG00001064	AFLA_082840	EQ963472	+	2846268–2846594		Putative uncharacterized protein [Source:UniProtKB/TrEMBL;Acc:B8MYZ5]
CADAFLAG00001065	AFLA_082850	EQ963472	+	2850111–2851376		C2H2 type conidiation transcription factor BrlA [Source:UniProtKB/TrEMBL;Acc:B8MYZ6]
CADAFLAG00001066	AFLA_082860	EQ963472	+	2851966-2852532	2848973-2852532	Putative uncharacterized protein [Source:UniProtKB/TrEMBL;Acc:B8MYZ7]
CADAFLAG00001067	AFLA_082870	EQ963472	-	2855420–2855959		GNAT family N-acetyltransferase, putative [Source:UniProtKB/TrEMBL;Acc:B8MYZ8]
CADAFLAG00001068	AFLA_082880	EQ963472	-	2856599–2857451		Putative uncharacterized protein [Source:UniProtKB/TrEMBL;Acc:B8MYZ9]
CADAFLAG00001069	AFLA_082890	EQ963472	+	2857888-2859062	2855873-2859254	Ribonuclease T2, putative [Source:UniProtKB/TrEMBL;Acc:B8MZ00]
CADAFLAG00001070	AFLA_082900	EQ963472	-	2859692-2860821	2858964-2860894	Swr1p complex component (Swc5), putative [Source:UniProtKB/TrEMBL;Acc:B8MZ01]
CADAFLAG00001071	AFLA_082910	EQ963472	+	2861092–2862097		C6 transcription factor, putative [Source:UniProtKB/TrEMBL;Acc:B8MZ02]
CADAFLAG00001072	AFLA_082920	EQ963472	+	2862244–2862936		Putative uncharacterized protein [Source:UniProtKB/TrEMBL;Acc:B8MZ03]
CADAFLAG00001073	AFLA_082930	EQ963472	+	2863861-2865027	2861051-2865133	Short chain dehydrogenase family protein [Source:UniProtKB/TrEMBL;Acc:B8MZ04]
CADAFLAG00001074	AFLA_082940	EQ963472	+	2865928–2866329		Putative uncharacterized protein [Source:UniProtKB/TrEMBL;Acc:B8MZ05]
CADAFLAG00001075	AFLA_082950	EQ963472	+	2866818-2867842	2866633-2868194	DSBA family oxidoreductase, putative [Source:UniProtKB/TrEMBL;Acc:B8MZ06]
CADAFLAG00001076	AFLA_082960	EQ963472	-	2868096–2868902		Putative uncharacterized protein [Source:UniProtKB/TrEMBL;Acc:B8MZ07]
CADAFLAG00001077	AFLA_082970	EQ963472	-	2870958–2872312		Monocarboxylate permease homolog, mch4, putative [Source:UniProtKB/TrEMBL;Acc:B8MZ08]
CADAFLAG00001078	AFLA_082980	EQ963472	+	2873794-2875058	2872214-2875058	Dihydroorotase, homodimeric type [Source:UniProtKB/TrEMBL;Acc:B8MZ09]
CADAFLAG00001079	AFLA_082990	EQ963472	-	2875147–2876318		MIND kinetochore complex component Mtw1, putative [Source:UniProtKB/TrEMBL;Acc:B8MZ10]
CADAFLAG00001080	AFLA_083000	EQ963472	+	2877722–2878651		MIF domain protein [Source:UniProtKB/TrEMBL;Acc:B8MZ11]
CADAFLAG00001081	AFLA_083010	EQ963472	+	2879039-2879754	2876266-2880904	Phosphatase, putative [Source:UniProtKB/TrEMBL;Acc:B8MZ12]
CADAFLAG00001082	AFLA_083020	EQ963472	+	2880078–2880770		Putative uncharacterized protein [Source:UniProtKB/TrEMBL;Acc:B8MZ13]
CADAFLAG00001083	AFLA_083030	EQ963472	-	2880960-2882655	2880700-2882781	Dihydrouridine synthase family protein, putative [Source:UniProtKB/TrEMBL;Acc:B8MZ14]
CADAFLAG00001084	AFLA_083040	EQ963472	+	2883292-2884878	2883138-2884923	WD40 domain protein [Source:UniProtKB/TrEMBL;Acc:B8MZ15]
CADAFLAG00001085	AFLA_083050	EQ963472	+	2885224-2885794	2885167-2885802	40S ribosomal protein S25, putative [Source:UniProtKB/TrEMBL;Acc:B8MZ16]
CADAFLAG00001086	AFLA_083060	EQ963472	-	2886168-2887020	2885269-2887231	Heme/steroid binding domain protein, putative [Source:UniProtKB/TrEMBL;Acc:B8MZ17]
CADAFLAG00001087	AFLA_083070	EQ963472	-	2888337-2889801	2888187-2890787	Small monomeric GTPase (Gtr2), putative [Source:UniProtKB/TrEMBL;Acc:B8MZ18]
CADAFLAG00001088	AFLA_083080	EQ963472	+	2891391-2893345	2891159-2893772	Histidine acid phosphatase, putative [Source:UniProtKB/TrEMBL;Acc:B8MZ19]
CADAFLAG00001089	AFLA_083090	EQ963472	-	2893674–2896916		tRNA processing endoribonuclease Trz1, putative [Source:UniProtKB/TrEMBL;Acc:B8MZ20]
CADAFLAG00001090	AFLA_083100	EQ963472	-	2898034-2899943	2893249-2900264	BZIP transcription factor (LziP), putative [Source:UniProtKB/TrEMBL;Acc:B8MZ21]
CADAFLAG00001091	AFLA_083110	EQ963472	-	2904467-2904773	2904369-2904986	Conidiation-specific protein (Con-10), putative [Source:UniProtKB/TrEMBL;Acc:B8MZ22]
CADAFLAG00001092	AFLA_083120	EQ963472	-	2906000-2906399	2905921-2907791	Thioredoxin [Source:UniProtKB/TrEMBL;Acc:B8MZ23]
CADAFLAG00001093	AFLA_083130	EQ963472	+	2907914-2910124	2906215-2910477	ABC ATPase, putative [Source:UniProtKB/TrEMBL;Acc:B8MZ24]
CADAFLAG00001094	AFLA_083140	EQ963472	-	2910401-2912695	2910086-2912804	Putative uncharacterized protein [Source:UniProtKB/TrEMBL;Acc:B8MZ25]
CADAFLAG00001095	AFLA_083150	EQ963472	-	2913522–2914321		Putative uncharacterized protein [Source:UniProtKB/TrEMBL;Acc:B8MZ26]
CADAFLAG00001096	AFLA_083160	EQ963472	+	2915275-2917695	2915195-2917735	Molybdopterin cofactor biosynthetic protein [Source:UniProtKB/TrEMBL;Acc:B8MZ27]
CADAFLAG00001097	AFLA_083170	EQ963472	+	2918615-2920898	2917934-2921459	Potassium transporter, putative [Source:UniProtKB/TrEMBL;Acc:B8MZ28]
CADAFLAG00001098	AFLA_083180	EQ963472	-	2921362-2923716	2920802-2923818	Ribosome assembly protein Noc2, putative [Source:UniProtKB/TrEMBL;Acc:B8MZ29]
CADAFLAG00001099	AFLA_083190	EQ963472	+	2923977–2924823		Vacuolar protein sorting-associated protein Vps28, putative [Source:UniProtKB/TrEMBL;Acc:B8MZ30]
CADAFLAG00001100	AFLA_083200	EQ963472	+	2925229-2926397	2923931-2926655	Glucose-inducible SAM-dependent methyltransferase Rrg1, putative [Source:UniProtKB/TrEMBL;Acc:B8MZ31]
CADAFLAG00001101	AFLA_083210	EQ963472	+	2926954-2927712	2926846-2927712	Putative uncharacterized protein [Source:UniProtKB/TrEMBL;Acc:B8MZ32]
CADAFLAG00001102	AFLA_083220	EQ963472	-	2927786-2929066	2927616-2929202	ATP dependent RNA helicase (Rok1), putative [Source:UniProtKB/TrEMBL;Acc:B8MZ33]
CADAFLAG00001103	AFLA_083230	EQ963472	-	2930528–2931590		Mitochondrial F1F0-ATP synthase g subunit, putative [Source:UniProtKB/TrEMBL;Acc:B8MZ34]
CADAFLAG00001104	AFLA_083240	EQ963472	+	2934533-2935740	2934133-2935934	Xylitol dehydrogenase LadA/XdhB [Source:UniProtKB/TrEMBL;Acc:B8MZ35]
CADAFLAG00001105	AFLA_083250	EQ963472	-	2936772–2938131		Dimethylallyl tryptophan synthase, putative [Source:UniProtKB/TrEMBL;Acc:B8MZ36]
CADAFLAG00001106	AFLA_083260	EQ963472	-	2939989-2941156	2939769-2941156	Putative uncharacterized protein [Source:UniProtKB/TrEMBL;Acc:B8MZ37]
CADAFLAG00001107	AFLA_083270	EQ963472	-	2942091-2944114	2941862-2944589	GABA permease, putative [Source:UniProtKB/TrEMBL;Acc:B8MZ38]
CADAFLAG00001108	AFLA_083280	EQ963472	-	2945832-2946313	2944940-2946485	Putative uncharacterized protein [Source:UniProtKB/TrEMBL;Acc:B8MZ39]
CADAFLAG00001109	AFLA_083290	EQ963472	-	2947507-2948586	2946682-2949621	Translation initiation factor eif-2B, putative [Source:UniProtKB/TrEMBL;Acc:B8MZ40]
CADAFLAG00001110	AFLA_083300	EQ963472	+	2951101-2954074	2950615-2954074	Probable alpha/beta-glucosidase agdC [Source:UniProtKB/Swiss-Prot;Acc:B8MZ41]
CADAFLAG00001111	AFLA_083310	EQ963472	-	2955630-2956625	2955523-2957932	TIM barrel metal-dependent hydrolase, putative [Source:UniProtKB/TrEMBL;Acc:B8MZ42]
CADAFLAG00001112	AFLA_083320	EQ963472	+	2957830-2959612	2957830-2960059	MFS quinate transporter, putative [Source:UniProtKB/TrEMBL;Acc:B8MZ43]
CADAFLAG00001113	AFLA_083330	EQ963472	-	2959979-2962748	2959522-2965547	C6 transcription factor, putative [Source:UniProtKB/TrEMBL;Acc:B8MZ44]
CADAFLAG00001114	AFLA_083340	EQ963472	-	2963324–2964904		Threonyl-tRNA synthetase [Source:UniProtKB/TrEMBL;Acc:B8MZ45]
CADAFLAG00001115	AFLA_083350	EQ963472	+	2965451-2966593	2964813-2967212	Putative uncharacterized protein [Source:UniProtKB/TrEMBL;Acc:B8MZ46]
CADAFLAG00001116	AFLA_083360	EQ963472	-	2967114-2968582	2966879-2969272	Extracellular cell wall glucanase Crf1/allergen Asp F9 [Source:UniProtKB/TrEMBL;Acc:B8MZ47]
CADAFLAG00001117	AFLA_083370	EQ963472	-	2972890-2974702	2972763-2974955	Glutathione oxidoreductase Glr1, putative [Source:UniProtKB/TrEMBL;Acc:B8MZ48]
CADAFLAG00001118	AFLA_083380	EQ963472	-	2975531-2977532	2975063-2978243	MAP kinase kinase (Pbs2), putative [Source:UniProtKB/TrEMBL;Acc:B8MZ49]
CADAFLAG00001119	AFLA_083390	EQ963472	-	2980445–2981299		Putative uncharacterized protein [Source:UniProtKB/TrEMBL;Acc:B8MZ50]
CADAFLAG00001120	AFLA_083400	EQ963472	+	2981516–2983460		Auxin Efflux Carrier superfamily [Source:UniProtKB/TrEMBL;Acc:B8MZ51]
CADAFLAG00001121	AFLA_083410	EQ963472	-	2983679-2985983	2983297-2987360	Laccase, putative [Source:UniProtKB/TrEMBL;Acc:B8MZ52]
CADAFLAG00001122	AFLA_083420	EQ963472	+	2986963-2989148	2986662-2993421	Non-hemolytic phospholipase C, putative [Source:UniProtKB/TrEMBL;Acc:B8MZ53]
CADAFLAG00001123	AFLA_083430	EQ963472	+	2990390-2993421	2992242-2993421	Choline kinase, putative [Source:UniProtKB/TrEMBL;Acc:B8MZ54]
CADAFLAG00001124	AFLA_083440	EQ963472	-	2993686–2994757		26S proteasome-associated ubiquitin C-terminal hydrolase, putative [Source:UniProtKB/TrEMBL;Acc:B8MZ55]
CADAFLAG00001125	AFLA_083450	EQ963472	-	2995112-2996323	2993686-2998901	Integral membrane protein, putative [Source:UniProtKB/TrEMBL;Acc:B8MZ56]
CADAFLAG00001126	AFLA_083460	EQ963472	-	3000711-3002597	3000348-3003439	C6 transcription factor RosA-like, putative [Source:UniProtKB/TrEMBL;Acc:B8MZ57]
CADAFLAG00001127	AFLA_083470	EQ963472	-	3011479-3011835	3011253-3012094	Ribosomal protein S28e [Source:UniProtKB/TrEMBL;Acc:B8MZ58]
CADAFLAG00001128	AFLA_083480	EQ963472	-	3012706-3014964	3012195-3016263	Importin beta-2 subunit, putative [Source:UniProtKB/TrEMBL;Acc:B8MZ59]
CADAFLAG00001129	AFLA_083490	EQ963472	+	3017631-3018789	3017493-3018991	Sterol delta 5,6-desaturase, putative [Source:UniProtKB/TrEMBL;Acc:B8MZ60]
CADAFLAG00001130	AFLA_083500	EQ963472	+	3020327-3022392	3020327-3024992	Diaminopropionate ammonia-lyase, putative [Source:UniProtKB/TrEMBL;Acc:B8MZ61]
CADAFLAG00001131	AFLA_083510	EQ963472	+	3022733–3024577		Homeobox and C2H2 transcription factor, putative [Source:UniProtKB/TrEMBL;Acc:B8MZ62]
CADAFLAG00001132	AFLA_083520	EQ963472	-	3024894–3027886		SacI domain protein [Source:UniProtKB/TrEMBL;Acc:B8MZ63]
CADAFLAG00001133	AFLA_083530	EQ963472	-	3028716-3030201	3024490-3030844	DUF803 domain membrane protein [Source:UniProtKB/TrEMBL;Acc:B8MZ64]
CADAFLAG00001134	AFLA_083540	EQ963472	-	3032651-3035634	3031991-3035917	Conserved glutamic acid-rich protein [Source:UniProtKB/TrEMBL;Acc:B8MZ65]
CADAFLAG00001135	AFLA_083550	EQ963472	+	3035909-3037632	3035825-3037632	Coatomer subunit delta, putative [Source:UniProtKB/TrEMBL;Acc:B8MZ66]
CADAFLAG00001136	AFLA_083560	EQ963472	+	3041149-3042657	3038029-3042657	C6 transcription factor, putative [Source:UniProtKB/TrEMBL;Acc:B8MZ67]
CADAFLAG00001137	AFLA_083570	EQ963472	-	3043916-3045579	3042266-3048321	Putative uncharacterized protein [Source:UniProtKB/TrEMBL;Acc:B8MZ68]
CADAFLAG00001138	AFLA_083580	EQ963472	-	3046232–3047596		Putative uncharacterized protein [Source:UniProtKB/TrEMBL;Acc:B8MZ69]
CADAFLAG00001139	AFLA_083590	EQ963472	+	3050659-3052323	3050123-3052323	Fatty acid hydroxylase, putative [Source:UniProtKB/TrEMBL;Acc:B8MZ70]
CADAFLAG00001140	AFLA_083600	EQ963472	+	3052631-3054505	3050248-3055432	RNA splicing factor (Pad-1), putative [Source:UniProtKB/TrEMBL;Acc:B8MZ71]
CADAFLAG00001141	AFLA_083610	EQ963472	-	3055006-3056003	3054826-3058851	Glutathione S-transferase, putative [Source:UniProtKB/TrEMBL;Acc:B8MZ72]
CADAFLAG00001142	AFLA_083620	EQ963472	-	3056471-3058307	3056228-3058451	Protein phosphatase 2C, putative [Source:UniProtKB/TrEMBL;Acc:B8MZ73]
CADAFLAG00001143	AFLA_083630	EQ963472	+	3061685-3062707	3060913-3063274	CDP-diacylglycerol-inositol 3-phosphatidyltransferase PIS [Source:UniProtKB/TrEMBL;Acc:B8MZ74]
CADAFLAG00001144	AFLA_083640	EQ963472	+	3063475-3064906	3063414-3064991	3-isopropylmalate dehydrogenase [Source:UniProtKB/TrEMBL;Acc:B8MZ75]
CADAFLAG00001145	AFLA_083650	EQ963472	-	3065277-3066692	3064808-3066783	Anaphase promoting complex subunit 10 (APC10), putative [Source:UniProtKB/TrEMBL;Acc:B8MZ76]
CADAFLAG00001146	AFLA_083660	EQ963472	-	3067118–3068746		Phosphatidylserine decarboxylase, putative [Source:UniProtKB/TrEMBL;Acc:B8MZ77]
CADAFLAG00001147	AFLA_083670	EQ963472	+	3068883–3069191		Putative uncharacterized protein [Source:UniProtKB/TrEMBL;Acc:B8MZ78]
CADAFLAG00001148	AFLA_083680	EQ963472	+	3069378-3071334	3068883-3071685	Conserved fungal protein [Source:UniProtKB/TrEMBL;Acc:B8MZ79]
CADAFLAG00001149	AFLA_083690	EQ963472	-	3071587-3072811	3071239-3074099	Phosphoglycerate mutase family protein [Source:UniProtKB/TrEMBL;Acc:B8MZ80]
CADAFLAG00001150	AFLA_083700	EQ963472	-	3072980–3074099		Putative uncharacterized protein [Source:UniProtKB/TrEMBL;Acc:B8MZ81]
CADAFLAG00001151	AFLA_083710	EQ963472	-	3074694–3075574		Putative uncharacterized protein [Source:UniProtKB/TrEMBL;Acc:B8MZ82]
CADAFLAG00001152	AFLA_083720	EQ963472	-	3076777–3077343		Putative uncharacterized protein [Source:UniProtKB/TrEMBL;Acc:B8MZ83]
CADAFLAG00001153	AFLA_083730	EQ963472	-	3078576-3080030	3076007-3080466	Epoxide hydrolase, putative [Source:UniProtKB/TrEMBL;Acc:B8MZ84]
CADAFLAG00001154	AFLA_083740	EQ963472	-	3080879-3081545	3080689-3081937	40S ribosomal protein S22 [Source:UniProtKB/TrEMBL;Acc:B8MZ85]
CADAFLAG00001155	AFLA_083750	EQ963472	-	3083165-3086306	3082485-3090694	Importin beta-1 subunit [Source:UniProtKB/TrEMBL;Acc:B8MZ86]
CADAFLAG00001156	AFLA_083760	EQ963472	-	3087704–3090564		Anaphase-promoting complex component Cut20/Apc4, putative [Source:UniProtKB/TrEMBL;Acc:B8MZ87]
CADAFLAG00001157	AFLA_083770	EQ963472	-	3091213-3093202	3091155-3093924	Putative uncharacterized protein [Source:UniProtKB/TrEMBL;Acc:B8MZ88]
CADAFLAG00001158	AFLA_083780	EQ963472	-	3094152–3094766		Putative uncharacterized protein [Source:UniProtKB/TrEMBL;Acc:B8MZ89]
CADAFLAG00001159	AFLA_083790	EQ963472	-	3095655-3096515	3095087-3097230	Putative uncharacterized protein [Source:UniProtKB/TrEMBL;Acc:B8MZ90]
CADAFLAG00001160	AFLA_083800	EQ963472	-	3098392-3099429	3097714-3099644	Putative uncharacterized protein [Source:UniProtKB/TrEMBL;Acc:B8MZ91]
CADAFLAG00001161	AFLA_083810	EQ963472	+	3100965-3106079	3099919-3107770	DEAD/DEAH box helicase, putative [Source:UniProtKB/TrEMBL;Acc:B8MZ92]
CADAFLAG00001162	AFLA_083820	EQ963472	-	3107545-3108582	3106003-3108904	C6 finger domain protein, putative [Source:UniProtKB/TrEMBL;Acc:B8MZ93]
CADAFLAG00001163	AFLA_083830	EQ963472	+	3109626–3110144		Putative uncharacterized protein [Source:UniProtKB/TrEMBL;Acc:B8MZ94]
CADAFLAG00001164	AFLA_083840	EQ963472	-	3111345-3113821	3110868-3114962	Putative uncharacterized protein [Source:UniProtKB/TrEMBL;Acc:B8MZ95]
CADAFLAG00001165	AFLA_083850	EQ963472	-	3115536–3116392		Putative uncharacterized protein [Source:UniProtKB/TrEMBL;Acc:B8MZ96]
CADAFLAG00001166	AFLA_083860	EQ963472	+	3117086–3117508		Putative uncharacterized protein [Source:UniProtKB/TrEMBL;Acc:B8MZ97]
CADAFLAG00001167	AFLA_083870	EQ963472	+	3118836-3119666	3116784-3120872	Acetylserotonin methytransferase-like protein (ASMTL), putative [Source:UniProtKB/TrEMBL;Acc:B8MZ98]
CADAFLAG00001168	AFLA_083880	EQ963472	-	3119957-3120783	3119782-3120886	Succinate dehydrogenase subunit CybS, putative [Source:UniProtKB/TrEMBL;Acc:B8MZ99]
CADAFLAG00001169	AFLA_083890	EQ963472	-	3121243-3122277	3121056-3123854	Oxidoreductase, zinc-binding dehydrogenase family, putative [Source:UniProtKB/TrEMBL;Acc:B8MZA0]
CADAFLAG00001170	AFLA_083900	EQ963472	+	3123769-3125798	3122886-3126510	DEAD box RNA helicase HelA, putative [Source:UniProtKB/TrEMBL;Acc:B8MZA1]
CADAFLAG00001171	AFLA_083910	EQ963472	-	3126549–3127542		Pirin domain protein, putative [Source:UniProtKB/TrEMBL;Acc:B8MZA2]
CADAFLAG00001172	AFLA_083920	EQ963472	-	3128262-3129740	3128021-3130226	Adenylosuccinate synthetase [Source:UniProtKB/Swiss-Prot;Acc:B8MZA3]
CADAFLAG00001173	AFLA_083930	EQ963472	-	3130609-3133443	3130345-3134296	DnaJ domain protein [Source:UniProtKB/TrEMBL;Acc:B8MZA4]
CADAFLAG00001174	AFLA_083940	EQ963472	-	3134796-3138008	3134481-3138638	C6 transcription factor (UaY), putative [Source:UniProtKB/TrEMBL;Acc:B8MZA5]
CADAFLAG00001175	AFLA_083950	EQ963472	-	3140224-3142899	3139743-3142984	MFS multidrug transporter, putative [Source:UniProtKB/TrEMBL;Acc:B8MZA6]
CADAFLAG00001176	AFLA_083960	EQ963472	+	3145174–3145487		Putative uncharacterized protein [Source:UniProtKB/TrEMBL;Acc:B8MZA7]
CADAFLAG00001177	AFLA_083970	EQ963472	-	3147420-3148055	3147420-3148725	Putative uncharacterized protein [Source:UniProtKB/TrEMBL;Acc:B8MZA8]
CADAFLAG00001178	AFLA_083980	EQ963472	+	3154243–3155895		GTP-binding protein Obg [Source:UniProtKB/TrEMBL;Acc:B8MZA9]
CADAFLAG00001179	AFLA_083990	EQ963472	+	3156304-3157965	3156197-3158247	JmjC domain protein, putative [Source:UniProtKB/TrEMBL;Acc:B8MZB0]
CADAFLAG00001180	AFLA_084000	EQ963472	-	3158200-3162427	3157872-3162427	Urea amidolyase, putative [Source:UniProtKB/TrEMBL;Acc:B8MZB1]
CADAFLAG00001181	AFLA_084010	EQ963472	+	3163412-3163810	3162481-3163939	Lactam utilization protein LamB [Source:UniProtKB/TrEMBL;Acc:B8MZB2]
CADAFLAG00001182	AFLA_084020	EQ963472	+	3166021–3168597		Homeobox and C2H2 transcription factor, putative [Source:UniProtKB/TrEMBL;Acc:B8MZB3]
CADAFLAG00001183	AFLA_084030	EQ963472	+	3169432-3170590	3169116-3170807	Putative uncharacterized protein [Source:UniProtKB/TrEMBL;Acc:B8MZB4]
CADAFLAG00001184	AFLA_084040	EQ963472	+	3171241–3171665		Putative uncharacterized protein [Source:UniProtKB/TrEMBL;Acc:B8MZB5]
CADAFLAG00001185	AFLA_084050	EQ963472	+	3173266-3174544	3173009-3175509	Ubiquitin-conjugating enzyme, putative [Source:UniProtKB/TrEMBL;Acc:B8MZB6]
CADAFLAG00001186	AFLA_084060	EQ963472	+	3174749–3175015		Putative uncharacterized protein [Source:UniProtKB/TrEMBL;Acc:B8MZB7]
CADAFLAG00001187	AFLA_084070	EQ963472	-	3175568-3176341	3174275-3177010	CUE domain protein, putative [Source:UniProtKB/TrEMBL;Acc:B8MZB8]
CADAFLAG00001188	AFLA_084080	EQ963472	+	3177863–3178998		Dimethylallyl tryptophan synthase, putative [Source:UniProtKB/TrEMBL;Acc:B8MZB9]
CADAFLAG00001189	AFLA_084090	EQ963472	+	3179694-3181734	3179386-3181797	C6 transcription factor, putative [Source:UniProtKB/TrEMBL;Acc:B8MZC0]
CADAFLAG00001190	AFLA_084100	EQ963472	-	3181824–3182437		2-oxoglutarate dehydrogenase, putative [Source:UniProtKB/TrEMBL;Acc:B8MZC1]
CADAFLAG00001191	AFLA_084110	EQ963472	-	3182578–3183015		2-oxoglutarate dehydrogenase, putative [Source:UniProtKB/TrEMBL;Acc:B8MZC2]
CADAFLAG00001192	AFLA_084120	EQ963472	-	3183068–3183520		2-oxoglutarate dehydrogenase, putative [Source:UniProtKB/TrEMBL;Acc:B8MZC3]
CADAFLAG00001193	AFLA_084130	EQ963472	-	3183580–3185084		Alpha-ketoglutarate dehydrogenase complex subunit Kgd1, putative [Source:UniProtKB/TrEMBL;Acc:B8MZC4]
CADAFLAG00001194	AFLA_084140	EQ963472	-	3185676-3187206	3181690-3187793	Dihydrolipoamide acetyltransferase component of pyruvate dehydrogenase, putative [Source:UniProtKB/TrEMBL;Acc:B8MZC5]
CADAFLAG00001195	AFLA_084150	EQ963472	+	3188069–3189193		Peroxisome biosynthesis protein (Peroxine-7), putative [Source:UniProtKB/TrEMBL;Acc:B8MZC6]
CADAFLAG00001196	AFLA_084160	EQ963472	-	3189654–3190590		DUF1014 domain protein [Source:UniProtKB/TrEMBL;Acc:B8MZC7]
CADAFLAG00001197	AFLA_084170	EQ963472	-	3191475–3193357		L-ascorbate oxidase, putative [Source:UniProtKB/TrEMBL;Acc:B8MZC8]
CADAFLAG00001198	AFLA_084180	EQ963472	-	3193799–3194354		Putative uncharacterized protein [Source:UniProtKB/TrEMBL;Acc:B8MZC9]
CADAFLAG00001199	AFLA_084190	EQ963472	-	3194506–3196602		Putative uncharacterized protein [Source:UniProtKB/TrEMBL;Acc:B8MZD0]
CADAFLAG00001200	AFLA_084200	EQ963472	-	3197412–3198950		C6 transcription factor, putative [Source:UniProtKB/TrEMBL;Acc:B8MZD1]
CADAFLAG00001201	AFLA_084210	EQ963472	-	3200087-3200982	3194506-3201601	Putative uncharacterized protein [Source:UniProtKB/TrEMBL;Acc:B8MZD2]
CADAFLAG00001202	AFLA_084220	EQ963472	-	3202445-3203242	3202165-3204557	Putative uncharacterized protein [Source:UniProtKB/TrEMBL;Acc:B8MZD3]
CADAFLAG00001203	AFLA_084230	EQ963472	+	3204225–3205602		Homoserine acetyltransferase family protein [Source:UniProtKB/TrEMBL;Acc:B8MZD4]
CADAFLAG00001204	AFLA_084240	EQ963472	+	3206071-3208240	3203288-3208938	Poly(A) polymerase Pap [Source:UniProtKB/TrEMBL;Acc:B8MZD5]
CADAFLAG00001205	AFLA_084250	EQ963472	-	3209098-3210685	3208264-3213335	Putative uncharacterized protein [Source:UniProtKB/TrEMBL;Acc:B8MZD6]
CADAFLAG00001206	AFLA_084260	EQ963472	-	3211385–3212863		DNA replication initiation factor Cdc45 [Source:UniProtKB/TrEMBL;Acc:B8MZD7]
CADAFLAG00001207	AFLA_084270	EQ963472	-	3214745-3215956	3214510-3216601	GPI anchor transamidase, putative [Source:UniProtKB/TrEMBL;Acc:B8MZD8]
CADAFLAG00001208	AFLA_084280	EQ963472	+	3216508-3218481	3215866-3218961	Cytochrome P450 monooxygenase, putative [Source:UniProtKB/TrEMBL;Acc:B8MZD9]
CADAFLAG00001209	AFLA_084290	EQ963472	+	3220915-3221451	3220288-3221633	Putative uncharacterized protein [Source:UniProtKB/TrEMBL;Acc:B8MZE0]
CADAFLAG00001210	AFLA_084310	EQ963472	-	3224746-3225418	3224116-3225418	Putative uncharacterized protein [Source:UniProtKB/TrEMBL;Acc:B8MZE1]
CADAFLAG00001211	AFLA_084320	EQ963472	-	3225598–3226142		Putative uncharacterized protein [Source:UniProtKB/TrEMBL;Acc:B8MZE2]
CADAFLAG00001212	AFLA_084330	EQ963472	-	3227128-3228219	3227077-3228324	Mitochondrial phosphate carrier protein (Mir1), putative [Source:UniProtKB/TrEMBL;Acc:B8MZE3]
CADAFLAG00001213	AFLA_084340	EQ963472	+	3229684-3231770	3228586-3232049	Alpha-amylase, putative [Source:UniProtKB/TrEMBL;Acc:B8MZE4]
CADAFLAG00001214	AFLA_084350	EQ963472	+	3236071–3236431		Putative uncharacterized protein [Source:UniProtKB/TrEMBL;Acc:B8MZE5]
CADAFLAG00001215	AFLA_084360	EQ963472	+	3237929-3238931	3235742-3239597	Acyl-CoA thioesterase II [Source:UniProtKB/TrEMBL;Acc:B8MZE6]
CADAFLAG00001216	AFLA_084370	EQ963472	-	3239499-3240682	3238966-3241556	Putative uncharacterized protein [Source:UniProtKB/TrEMBL;Acc:B8MZE7]
CADAFLAG00001217	AFLA_084380	EQ963472	-	3244303-3245297	3244303-3246142	Hsp70 family protein [Source:UniProtKB/TrEMBL;Acc:B8MZE8]
CADAFLAG00001218	AFLA_084390	EQ963472	-	3246744-3248211	3246661-3249861	Putative uncharacterized protein [Source:UniProtKB/TrEMBL;Acc:B8MZE9]
CADAFLAG00001219	AFLA_084400	EQ963472	+	3248609–3249341		Putative uncharacterized protein [Source:UniProtKB/TrEMBL;Acc:B8MZF0]
CADAFLAG00001220	AFLA_084410	EQ963472	+	3256335-3258795	3255064-3259727	C6 transcription factor, putative [Source:UniProtKB/TrEMBL;Acc:B8MZF1]
CADAFLAG00001221	AFLA_084420	EQ963472	-	3259350-3260047	3258713-3260105	Prefoldin subunit 4, putative [Source:UniProtKB/TrEMBL;Acc:B8MZF2]
CADAFLAG00001222	AFLA_084430	EQ963472	-	3260903–3261214		Putative uncharacterized protein [Source:UniProtKB/TrEMBL;Acc:B8MZF3]
CADAFLAG00001223	AFLA_084440	EQ963472	+	3262989-3264143	3262505-3265150	Autophagy protein Atg27, putative [Source:UniProtKB/TrEMBL;Acc:B8MZF4]
CADAFLAG00001224	AFLA_084450	EQ963472	-	3264832-3266434	3264049-3266971	Putative uncharacterized protein [Source:UniProtKB/TrEMBL;Acc:B8MZF5]
CADAFLAG00001225	AFLA_084460	EQ963472	+	3269096-3271882	3267083-3272299	Heat shock protein Hsp98/Hsp104/ClpA, putative [Source:UniProtKB/TrEMBL;Acc:B8MZF6]
CADAFLAG00001226	AFLA_084470	EQ963472	-	3272214–3273427		Polysaccharide deacetylase family protein [Source:UniProtKB/TrEMBL;Acc:B8MZF7]
CADAFLAG00001227	AFLA_084480	EQ963472	-	3273436-3274764	3272214-3274764	Short chain dehydrogenase, putative [Source:UniProtKB/TrEMBL;Acc:B8MZF8]
CADAFLAG00001228	AFLA_084490	EQ963472	-	3277681–3278829		Putative uncharacterized protein [Source:UniProtKB/TrEMBL;Acc:B8MZF9]
CADAFLAG00001229	AFLA_084500	EQ963472	+	3282254-3284061	3281938-3284243	Choline transport protein, putative [Source:UniProtKB/TrEMBL;Acc:B8MZG0]
CADAFLAG00001230	AFLA_084510	EQ963472	+	3284821-3287478	3284490-3287591	DsDNA-dependent ATPase (Rad54b), putative [Source:UniProtKB/TrEMBL;Acc:B8MZG1]
CADAFLAG00001231	AFLA_084520	EQ963472	-	3288015-3293147	3287682-3293750	Putative uncharacterized protein [Source:UniProtKB/TrEMBL;Acc:B8MZG2]
CADAFLAG00001232	AFLA_084530	EQ963472	-	3294691-3295283	3294550-3295845	EBP domain protein, putative [Source:UniProtKB/TrEMBL;Acc:B8MZG3]
CADAFLAG00001233	AFLA_084540	EQ963472	+	3296133-3298296	3295922-3298323	Putative uncharacterized protein [Source:UniProtKB/TrEMBL;Acc:B8MZG4]
CADAFLAG00001234	AFLA_084550	EQ963472	-	3298395–3298769		Putative uncharacterized protein [Source:UniProtKB/TrEMBL;Acc:B8MZG5]
CADAFLAG00001235	AFLA_084560	EQ963472	-	3299227–3300332		Pyridoxal reductase, putative [Source:UniProtKB/TrEMBL;Acc:B8MZG6]
CADAFLAG00001236	AFLA_084570	EQ963472	-	3301439–3303334		Putative uncharacterized protein [Source:UniProtKB/TrEMBL;Acc:B8MZG7]
CADAFLAG00001237	AFLA_084580	EQ963472	+	3303907-3305607	3303736-3305645	MtDNA inheritance protein Dml1, putative [Source:UniProtKB/TrEMBL;Acc:B8MZG8]
CADAFLAG00001238	AFLA_084590	EQ963472	+	3306190-3309147	3305809-3309890	Hsp70 family chaperone Lhs1/Orp150, putative [Source:UniProtKB/TrEMBL;Acc:B8MZG9]
CADAFLAG00001239	AFLA_084600	EQ963472	-	3309802-3310575	3309049-3310752	Putative uncharacterized protein [Source:UniProtKB/TrEMBL;Acc:B8MZH0]
CADAFLAG00001240	AFLA_084610	EQ963472	-	3311194–3313648		SDA1 domain protein [Source:UniProtKB/TrEMBL;Acc:B8MZH1]
CADAFLAG00001241	AFLA_084620	EQ963472	-	3314270–3315167		40S ribosomal protein S5, putative [Source:UniProtKB/TrEMBL;Acc:B8MZH2]
CADAFLAG00001242	AFLA_084630	EQ963472	+	3316441-3322204	3315984-3326027	AMP binding domain protein, putative [Source:UniProtKB/TrEMBL;Acc:B8MZH3]
CADAFLAG00001243	AFLA_084640	EQ963472	+	3324501–3326027		Putative uncharacterized protein [Source:UniProtKB/TrEMBL;Acc:B8MZH4]
CADAFLAG00001244	AFLA_084650	EQ963472	-	3326224-3327343	3325977-3327576	Palmitoyltransferase with autoacylation activity Pfa4, putative [Source:UniProtKB/TrEMBL;Acc:B8MZH5]
CADAFLAG00001245	AFLA_084660	EQ963472	-	3329827-3332022	3329827-3332270	2-isopropylmalate synthase [Source:UniProtKB/TrEMBL;Acc:B8MZH6]
CADAFLAG00001246	AFLA_084670	EQ963472	-	3332937-3335457	3332937-3335580	ATP-dependent RNA helicase (Drs1), putative [Source:UniProtKB/TrEMBL;Acc:B8MZH7]
CADAFLAG00001247	AFLA_084680	EQ963472	-	3336320–3338050		Putative uncharacterized protein [Source:UniProtKB/TrEMBL;Acc:B8MZH8]
CADAFLAG00001248	AFLA_084690	EQ963472	+	3339469-3340278	3339269-3340957	ADP-ribosylation factor family protein [Source:UniProtKB/TrEMBL;Acc:B8MZH9]
CADAFLAG00001249	AFLA_084700	EQ963472	+	3342033-3348135	3341541-3356324	Gelsolin repeat protein, putative [Source:UniProtKB/TrEMBL;Acc:B8MZI0]
CADAFLAG00001250	AFLA_084710	EQ963472	+	3348643–3350391		Sugar 1,4-lactone oxidase, putative [Source:UniProtKB/TrEMBL;Acc:B8MZI1]
CADAFLAG00001251	AFLA_084720	EQ963472	+	3353819-3355013	3352722-3356324	C6 transcription factor, putative [Source:UniProtKB/TrEMBL;Acc:B8MZI2]
CADAFLAG00001252	AFLA_084730	EQ963472	-	3356941-3359359	3356733-3359599	Protein translocation complex component (Npl1), putative [Source:UniProtKB/TrEMBL;Acc:B8MZI3]
CADAFLAG00001253	AFLA_084740	EQ963472	-	3360574-3361014	3359819-3361443	Putative uncharacterized protein [Source:UniProtKB/TrEMBL;Acc:B8MZI4]
CADAFLAG00001254	AFLA_084750	EQ963472	-	3363232-3364817	3362666-3365238	Probable Xaa-Pro aminopeptidase AFLA_084750 [Source:UniProtKB/Swiss-Prot;Acc:B8MZI5]
CADAFLAG00001255	AFLA_084760	EQ963472	+	3365678-3367354	3364721-3367996	Endosomal SPRY domain protein, putative [Source:UniProtKB/TrEMBL;Acc:B8MZI6]
CADAFLAG00001256	AFLA_084770	EQ963472	+	3369700–3371662		cAMP-specific phosphodiesterase, putative [Source:UniProtKB/TrEMBL;Acc:B8MZI7]
CADAFLAG00001257	AFLA_084780	EQ963472	-	3372233-3374246	3372010-3379302	N-acylethanolamine amidohydrolase, putative [Source:UniProtKB/TrEMBL;Acc:B8MZI8]
CADAFLAG00001258	AFLA_084790	EQ963472	-	3374510–3376071		GPI anchor biosynthesis protein Gwt1, putative [Source:UniProtKB/TrEMBL;Acc:B8MZI9]
CADAFLAG00001259	AFLA_084800	EQ963472	+	3376956-3377229	3375977-3380890	Putative uncharacterized protein [Source:UniProtKB/TrEMBL;Acc:B8MZJ0]
CADAFLAG00001260	AFLA_084810	EQ963472	+	3379206-3380264	3379206-3380890	Putative uncharacterized protein [Source:UniProtKB/TrEMBL;Acc:B8MZJ1]
CADAFLAG00001261	AFLA_084820	EQ963472	-	3381147-3382629	3380939-3384545	Acyl-CoA dehydrogenase, putative [Source:UniProtKB/TrEMBL;Acc:B8MZJ2]
CADAFLAG00001262	AFLA_084830	EQ963472	+	3382681–3383406		Putative uncharacterized protein [Source:UniProtKB/TrEMBL;Acc:B8MZJ3]
CADAFLAG00001263	AFLA_084840	EQ963472	+	3384447–3386007		Putative uncharacterized protein [Source:UniProtKB/TrEMBL;Acc:B8MZJ4]
CADAFLAG00001264	AFLA_084850	EQ963472	+	3390998-3394418	3389390-3395313	Serine/threonine protein kinase (Kin4), putative [Source:UniProtKB/TrEMBL;Acc:B8MZJ5]
CADAFLAG00001265	AFLA_084860	EQ963472	-	3398145-3398360	3397518-3400234	Putative uncharacterized protein [Source:UniProtKB/TrEMBL;Acc:B8MZJ6]
CADAFLAG00001266	AFLA_084870	EQ963472	+	3402912–3403189		Putative uncharacterized protein [Source:UniProtKB/TrEMBL;Acc:B8MZJ7]
CADAFLAG00001267	AFLA_084880	EQ963472	+	3404355-3405653	3403931-3405800	Mitochondrial distribution and morphology protein 12 [Source:UniProtKB/Swiss-Prot;Acc:B8MZJ8]
CADAFLAG00001268	AFLA_084890	EQ963472	+	3406303-3407865	3397692-3412663	Aspartyl protease, putative [Source:UniProtKB/TrEMBL;Acc:B8MZJ9]
CADAFLAG00001269	AFLA_084900	EQ963472	-	3409072–3411521		GTPase activating protein Sar1, putative [Source:UniProtKB/TrEMBL;Acc:B8MZK0]
CADAFLAG00001270	AFLA_084910	EQ963472	-	3417180–3418580		Exosome complex exonuclease Rrp6, putative [Source:UniProtKB/TrEMBL;Acc:B8MZK1]
CADAFLAG00001271	AFLA_084920	EQ963472	-	3419868-3420784	3419242-3421335	N-acetylglucosaminyl transferase component Gpi1 [Source:UniProtKB/TrEMBL;Acc:B8MZK2]
CADAFLAG00001272	AFLA_084930	EQ963472	-	3422336–3425215		DNA mismatch repair protein Msh2, putative [Source:UniProtKB/TrEMBL;Acc:B8MZK3]
CADAFLAG00001273	AFLA_084940	EQ963472	-	3425615–3427045		Putative uncharacterized protein [Source:UniProtKB/TrEMBL;Acc:B8MZK4]
CADAFLAG00001274	AFLA_084950	EQ963472	-	3427785-3428357	3427785-3428713	Putative uncharacterized protein [Source:UniProtKB/TrEMBL;Acc:B8MZK5]
CADAFLAG00001275	AFLA_084960	EQ963472	-	3429085–3429277		Putative uncharacterized protein [Source:UniProtKB/TrEMBL;Acc:B8MZK6]
CADAFLAG00001276	AFLA_084970	EQ963472	-	3429809-3431853	3428938-3433062	C2H2 transcription factor, putative [Source:UniProtKB/TrEMBL;Acc:B8MZK7]
CADAFLAG00001277	AFLA_084980	EQ963472	+	3432372–3432819		Putative uncharacterized protein [Source:UniProtKB/TrEMBL;Acc:B8MZK8]
CADAFLAG00001278	AFLA_084990	EQ963472	-	3433239–3434057		Putative uncharacterized protein [Source:UniProtKB/TrEMBL;Acc:B8MZK9]
CADAFLAG00001279	AFLA_085000	EQ963472	-	3437552-3438925	3434410-3439205	Golgi transport complex component Cog5, putative [Source:UniProtKB/TrEMBL;Acc:B8MZL0]
CADAFLAG00001280	AFLA_085010	EQ963472	-	3440306–3441122		Putative uncharacterized protein [Source:UniProtKB/TrEMBL;Acc:B8MZL1]
CADAFLAG00001281	AFLA_085020	EQ963472	-	3441602–3442830		Class II aldolase/adducin domain protein [Source:UniProtKB/TrEMBL;Acc:B8MZL2]
CADAFLAG00001282	AFLA_085030	EQ963472	-	3443493–3444180		Protein sys1, putative [Source:UniProtKB/TrEMBL;Acc:B8MZL3]
CADAFLAG00001283	AFLA_085040	EQ963472	+	3444672-3445157	3443783-3445896	Putative uncharacterized protein [Source:UniProtKB/TrEMBL;Acc:B8MZL4]
CADAFLAG00001284	AFLA_085050	EQ963472	-	3445799-3448754	3440049-3449682	Arginine/serine-rich splicing factor, putative [Source:UniProtKB/TrEMBL;Acc:B8MZL5]
CADAFLAG00001285	AFLA_085060	EQ963472	+	3450379-3451131	3449953-3451131	Peptidyl-tRNA hydrolase domain protein [Source:UniProtKB/TrEMBL;Acc:B8MZL6]
CADAFLAG00001286	AFLA_085070	EQ963472	-	3451263–3452510		rRNA processing protein Utp6, putative [Source:UniProtKB/TrEMBL;Acc:B8MZL7]
CADAFLAG00001287	AFLA_085080	EQ963472	+	3452878-3454043	3452313-3454090	Fgf receptor activating protein, putative [Source:UniProtKB/TrEMBL;Acc:B8MZL8]
CADAFLAG00001288	AFLA_085090	EQ963472	+	3454304-3456619	3454233-3456619	Integral plasma membrane protein, putative [Source:UniProtKB/TrEMBL;Acc:B8MZL9]
CADAFLAG00001289	AFLA_085100	EQ963472	+	3458107-3459101	3457450-3459101	Putative uncharacterized protein [Source:UniProtKB/TrEMBL;Acc:B8MZM0]
CADAFLAG00001290	AFLA_085110	EQ963472	+	3461914–3463512		Cleavage and polyadenylylation specificity factor, putative [Source:UniProtKB/TrEMBL;Acc:B8MZM1]
CADAFLAG00001291	AFLA_085120	EQ963472	-	3463667-3465681	3463447-3466016	Amino acid permease [Source:UniProtKB/TrEMBL;Acc:B8MZM2]
CADAFLAG00001292	AFLA_085130	EQ963472	+	3466498-3469820	3465481-3469907	Sec23/Sec24 family protein [Source:UniProtKB/TrEMBL;Acc:B8MZM3]
CADAFLAG00001293	AFLA_085140	EQ963472	+	3471753-3472271	3471233-3472649	Extracellular thaumatin domain protein, putative [Source:UniProtKB/TrEMBL;Acc:B8MZM4]
CADAFLAG00001294	AFLA_085150	EQ963472	-	3473923–3474552		ATP-binding cassette transporter, putative [Source:UniProtKB/TrEMBL;Acc:B8MZM5]
CADAFLAG00001295	AFLA_085160	EQ963472	-	3474575-3477868	3473797-3478093	ABC efflux transporter, putative [Source:UniProtKB/TrEMBL;Acc:B8MZM6]
CADAFLAG00001296	AFLA_085170	EQ963472	-	3480030-3482130	3479564-3482775	C6 transcription factor OefC [Source:UniProtKB/TrEMBL;Acc:B8MZM7]
CADAFLAG00001297	AFLA_085180	EQ963472	+	3483398–3485357		Putative uncharacterized protein [Source:UniProtKB/TrEMBL;Acc:B8MZM8]
CADAFLAG00001298	AFLA_085190	EQ963472	+	3490307-3491861	3488652-3492679	Putative uncharacterized protein [Source:UniProtKB/TrEMBL;Acc:B8MZM9]
CADAFLAG00001299	AFLA_085200	EQ963472	-	3492582-3493928	3491777-3494752	Camp independent regulatory protein [Source:UniProtKB/TrEMBL;Acc:B8MZN0]
CADAFLAG00001300	AFLA_085210	EQ963472	+	3500672–3502626		Putative uncharacterized protein [Source:UniProtKB/TrEMBL;Acc:B8MZN1]
CADAFLAG00001301	AFLA_085220	EQ963472	-	3507403–3509179		Asparaginyl-tRNA synthetase Slm5, putative [Source:UniProtKB/TrEMBL;Acc:B8MZN2]
CADAFLAG00001302	AFLA_085230	EQ963472	+	3512155-3512642	3511041-3512642	Putative uncharacterized protein [Source:UniProtKB/TrEMBL;Acc:B8MZN3]
CADAFLAG00001303	AFLA_085240	EQ963472	-	3512353-3513319	3511041-3513377	Putative uncharacterized protein [Source:UniProtKB/TrEMBL;Acc:B8MZN4]
CADAFLAG00001304	AFLA_085250	EQ963472	-	3514361-3517540	3514160-3517993	RNA binding protein, putative [Source:UniProtKB/TrEMBL;Acc:B8MZN5]
CADAFLAG00001305	AFLA_085260	EQ963472	+	3518525-3519589	3518249-3519679	Histone acetyltransferase (MysT1), putative [Source:UniProtKB/TrEMBL;Acc:B8MZN6]
CADAFLAG00001306	AFLA_085270	EQ963472	-	3519922–3522070		T-complex protein 1, zeta subunit, putative [Source:UniProtKB/TrEMBL;Acc:B8MZN7]
CADAFLAG00001307	AFLA_085280	EQ963472	+	3522383-3524067	3521976-3525851	Pre-rRNA processing nucleolar protein Sik1, putative [Source:UniProtKB/TrEMBL;Acc:B8MZN8]
CADAFLAG00001308	AFLA_085290	EQ963472	+	3524485–3525655		Putative uncharacterized protein [Source:UniProtKB/TrEMBL;Acc:B8MZN9]
CADAFLAG00001309	AFLA_085300	EQ963472	-	3525767–3526434		Putative uncharacterized protein [Source:UniProtKB/TrEMBL;Acc:B8MZP0]
CADAFLAG00001310	AFLA_085310	EQ963472	+	3526886–3533694		DNA polymerase [Source:UniProtKB/TrEMBL;Acc:B8MZP1]
CADAFLAG00001311	AFLA_085320	EQ963472	+	3534487-3535920	3534022-3536243	Calcium/calmodulin dependent protein kinase, putative [Source:UniProtKB/TrEMBL;Acc:B8MZP2]
CADAFLAG00001312	AFLA_085330	EQ963472	+	3537081-3537739	3536565-3537739	Putative uncharacterized protein [Source:UniProtKB/TrEMBL;Acc:B8MZP3]
CADAFLAG00001313	AFLA_085340	EQ963472	+	3537836–3538359		Putative uncharacterized protein [Source:UniProtKB/TrEMBL;Acc:B8MZP4]
CADAFLAG00001314	AFLA_085350	EQ963472	-	3538705-3539818	3538462-3540595	AMMECR1 family protein [Source:UniProtKB/TrEMBL;Acc:B8MZP5]
CADAFLAG00001315	AFLA_085360	EQ963472	-	3542046–3544006		Regulatory factor Sgt1, putative [Source:UniProtKB/TrEMBL;Acc:B8MZP6]
CADAFLAG00001316	AFLA_085370	EQ963472	+	3544382-3548054	3544273-3548610	Spindle-pole body protein (Pcp1), putative [Source:UniProtKB/TrEMBL;Acc:B8MZP7]
CADAFLAG00001317	AFLA_085380	EQ963472	-	3549171–3550660		Vacuolar sorting ATPase Vps4, putative [Source:UniProtKB/TrEMBL;Acc:B8MZP8]
CADAFLAG00001318	AFLA_085390	EQ963472	+	3551119-3551631	3551089-3552454	Prefoldin subunit 6, putative [Source:UniProtKB/TrEMBL;Acc:B8MZP9]
CADAFLAG00001319	AFLA_085400	EQ963472	-	3552357-3554121	3551660-3554639	Phosphoglycerate mutase, 2,3-bisphosphoglycerate-independent [Source:UniProtKB/TrEMBL;Acc:B8MZQ0]
CADAFLAG00001320	AFLA_085410	EQ963472	+	3554545-3555207	3554504-3555803	Putative uncharacterized protein [Source:UniProtKB/TrEMBL;Acc:B8MZQ1]
CADAFLAG00001321	AFLA_085420	EQ963472	+	3556408-3557999	3556065-3558696	Serine hydroxymethyltransferase [Source:UniProtKB/TrEMBL;Acc:B8MZQ2]
CADAFLAG00001322	AFLA_085430	EQ963472	-	3558598-3560303	3557901-3560485	Prenylcysteine lyase, putative [Source:UniProtKB/TrEMBL;Acc:B8MZQ3]
CADAFLAG00001323	AFLA_085440	EQ963472	+	3560793–3562140		PDCD2_C domain protein, putative [Source:UniProtKB/TrEMBL;Acc:B8MZQ4]
CADAFLAG00001324	AFLA_085450	EQ963472	-	3562709-3563713	3562342-3564190	Eukaryotic translation initiation factor 3 subunit K [Source:UniProtKB/TrEMBL;Acc:B8MZQ5]
CADAFLAG00001325	AFLA_085460	EQ963472	+	3564097-3567091	3563981-3569049	Putative uncharacterized protein [Source:UniProtKB/TrEMBL;Acc:B8MZQ6]
CADAFLAG00001326	AFLA_085470	EQ963472	+	3567914–3568259		Putative uncharacterized protein [Source:UniProtKB/TrEMBL;Acc:B8MZQ7]
CADAFLAG00001327	AFLA_085480	EQ963472	+	3570310-3571469	3569826-3572425	Cell wall glucanase, putative [Source:UniProtKB/TrEMBL;Acc:B8MZQ8]
CADAFLAG00001328	AFLA_085490	EQ963472	+	3574881-3578489	3573770-3579070	P450 family fatty acid hydroxylase, putative [Source:UniProtKB/TrEMBL;Acc:B8MZQ9]
CADAFLAG00001329	AFLA_085500	EQ963472	-	3578976-3579839	3578394-3581188	Extracellular proline-glycine rich protein [Source:UniProtKB/TrEMBL;Acc:B8MZR0]
CADAFLAG00001330	AFLA_085510	EQ963472	-	3583856-3586129	3583761-3586404	Trytophan synthase alpha subunit, putative [Source:UniProtKB/TrEMBL;Acc:B8MZR1]
CADAFLAG00001331	AFLA_085520	EQ963472	+	3586976-3588114	3586035-3588276	Glycan biosynthesis protein (PigL), putative [Source:UniProtKB/TrEMBL;Acc:B8MZR2]
CADAFLAG00001332	AFLA_085530	EQ963472	+	3590774–3592387		Monooxygenase, putative [Source:UniProtKB/TrEMBL;Acc:B8MZR3]
CADAFLAG00001333	AFLA_085540	EQ963472	+	3594270–3594737		Putative uncharacterized protein [Source:UniProtKB/TrEMBL;Acc:B8MZR4]
CADAFLAG00001334	AFLA_085550	EQ963472	+	3596406-3596890	3596355-3596890	Putative uncharacterized protein [Source:UniProtKB/TrEMBL;Acc:B8MZR5]
CADAFLAG00001335	AFLA_085560	EQ963472	+	3597946–3598309		Putative uncharacterized protein [Source:UniProtKB/TrEMBL;Acc:B8MZR6]
CADAFLAG00001336	AFLA_085570	EQ963472	+	3599198–3600305		Lipase/esterase, putative [Source:UniProtKB/TrEMBL;Acc:B8MZR7]
CADAFLAG00001337	AFLA_085580	EQ963472	+	3601063–3601982		Oxidoreductase, short chain dehydrogenase/reductase family protein, putative [Source:UniProtKB/TrEMBL;Acc:B8MZR8]
CADAFLAG00001338	AFLA_085590	EQ963472	-	3602505-3603575	3601988-3605228	Arabinan endo-1,5-alpha-L-arabinosidase [Source:UniProtKB/TrEMBL;Acc:B8MZR9]
CADAFLAG00001339	AFLA_085600	EQ963472	+	3606272-3607072	3605820-3607670	Putative uncharacterized protein [Source:UniProtKB/TrEMBL;Acc:B8MZS0]
CADAFLAG00001340	AFLA_085610	EQ963472	-	3607575–3608684		Sulfur metabolite repression control protein, putative [Source:UniProtKB/TrEMBL;Acc:B8MZS1]
CADAFLAG00001341	AFLA_085620	EQ963472	-	3608755–3609587		Putative uncharacterized protein [Source:UniProtKB/TrEMBL;Acc:B8MZS2]
CADAFLAG00001342	AFLA_085630	EQ963472	+	3610880–3611879		Putative uncharacterized protein [Source:UniProtKB/TrEMBL;Acc:B8MZS3]
CADAFLAG00001343	AFLA_085640	EQ963472	-	3614806–3615650		Putative uncharacterized protein [Source:UniProtKB/TrEMBL;Acc:B8MZS4]
CADAFLAG00001344	AFLA_085650	EQ963472	+	3616376–3617971		Putative uncharacterized protein [Source:UniProtKB/TrEMBL;Acc:B8MZS5]
CADAFLAG00001345	AFLA_085660	EQ963472	+	3618375–3619454		Arsenic resistance protein ArsH [Source:UniProtKB/TrEMBL;Acc:B8MZS6]
CADAFLAG00001346	AFLA_085670	EQ963472	-	3619726–3621346		Efflux pump antibiotic resistance protein, putative [Source:UniProtKB/TrEMBL;Acc:B8MZS7]
CADAFLAG00001347	AFLA_085680	EQ963472	-	3622262–3622645		Putative uncharacterized protein [Source:UniProtKB/TrEMBL;Acc:B8MZS8]
CADAFLAG00001348	AFLA_085690	EQ963472	-	3623669–3625282		Putative uncharacterized protein [Source:UniProtKB/TrEMBL;Acc:B8MZS9]
CADAFLAG00001349	AFLA_085700	EQ963472	-	3630393-3630969	3630381-3631071	Arsenate reductase (Arc2), putative [Source:UniProtKB/TrEMBL;Acc:B8MZT0]
CADAFLAG00001350	AFLA_085710	EQ963472	+	3631381-3632717	3631277-3632904	Arsenite efflux transporter (ArsB), putative [Source:UniProtKB/TrEMBL;Acc:B8MZT1]
CADAFLAG00001351	AFLA_085720	EQ963472	-	3632832-3634847	3632690-3635117	Putative uncharacterized protein [Source:UniProtKB/TrEMBL;Acc:B8MZT2]
CADAFLAG00001352	AFLA_085730	EQ963472	-	3636379–3637144		Putative uncharacterized protein [Source:UniProtKB/TrEMBL;Acc:B8MZT3]
CADAFLAG00001353	AFLA_085740	EQ963472	-	3639233-3640760	3638313-3641955	C6 transcription factor, putative [Source:UniProtKB/TrEMBL;Acc:B8MZT4]
CADAFLAG00001354	AFLA_085750	EQ963472	-	3640949–3641632		C6 transcription factor, putative [Source:UniProtKB/TrEMBL;Acc:B8MZT5]
CADAFLAG00001355	AFLA_085760	EQ963472	+	3642772-3643398	3642608-3643802	Putative uncharacterized protein [Source:UniProtKB/TrEMBL;Acc:B8MZT6]
CADAFLAG00001356	AFLA_085770	EQ963472	+	3644059–3645727		DNA replication regulator sld2 [Source:UniProtKB/TrEMBL;Acc:B8MZT7]
CADAFLAG00001357	AFLA_085780	EQ963472	-	3645904–3647157		RING finger domain protein [Source:UniProtKB/TrEMBL;Acc:B8MZT8]
CADAFLAG00001358	AFLA_085790	EQ963472	+	3647229-3649257	3647064-3651689	Putative uncharacterized protein [Source:UniProtKB/TrEMBL;Acc:B8MZT9]
CADAFLAG00001359	AFLA_085800	EQ963472	+	3650401–3651258		Putative uncharacterized protein [Source:UniProtKB/TrEMBL;Acc:B8MZU0]
CADAFLAG00001360	AFLA_085810	EQ963472	+	3652561-3654987	3652487-3654987	OPT peptide transporter Mtd1, putative [Source:UniProtKB/TrEMBL;Acc:B8MZU1]
CADAFLAG00001361	AFLA_085820	EQ963472	-	3656077-3657052	3655550-3658037	Putative uncharacterized protein [Source:UniProtKB/TrEMBL;Acc:B8MZU2]
CADAFLAG00001362	AFLA_085830	EQ963472	+	3658712-3661951	3658561-3662222	Putative uncharacterized protein [Source:UniProtKB/TrEMBL;Acc:B8MZU3]
CADAFLAG00001363	AFLA_085840	EQ963472	+	3662761-3664152	3662285-3664632	Tubulin-specific chaperone c, putative [Source:UniProtKB/TrEMBL;Acc:B8MZU4]
CADAFLAG00001364	AFLA_085850	EQ963472	-	3664788-3666265	3664070-3666444	Putative uncharacterized protein [Source:UniProtKB/TrEMBL;Acc:B8MZU5]
CADAFLAG00001365	AFLA_085860	EQ963472	-	3667541-3668064	3667364-3668316	Putative uncharacterized protein [Source:UniProtKB/TrEMBL;Acc:B8MZU6]
CADAFLAG00001366	AFLA_085870	EQ963472	-	3668691-3670253	3668510-3670270	Putative uncharacterized protein [Source:UniProtKB/TrEMBL;Acc:B8MZU7]
CADAFLAG00001367	AFLA_085880	EQ963472	-	3670944–3672745		BTB domain transcription factor, putative [Source:UniProtKB/TrEMBL;Acc:B8MZU8]
CADAFLAG00001368	AFLA_085890	EQ963472	-	3673039–3673671		Putative uncharacterized protein [Source:UniProtKB/TrEMBL;Acc:B8MZU9]
CADAFLAG00001369	AFLA_085900	EQ963472	-	3673850–3674157		Putative uncharacterized protein [Source:UniProtKB/TrEMBL;Acc:B8MZV0]
CADAFLAG00001370	AFLA_085910	EQ963472	+	3674411–3678461		Coatomer subunit alpha, putative [Source:UniProtKB/TrEMBL;Acc:B8MZV1]
CADAFLAG00001371	AFLA_085920	EQ963472	-	3678906-3679604	3678063-3680199	FAD dependent sulfhydryl oxidase Erv1, putative [Source:UniProtKB/TrEMBL;Acc:B8MZV2]
CADAFLAG00001372	AFLA_085930	EQ963472	+	3679762-3681402	3679762-3681602	Transcriptional regulator, putative [Source:UniProtKB/TrEMBL;Acc:B8MZV3]
CADAFLAG00001373	AFLA_085940	EQ963472	+	3682065-3684315	3682063-3684588	AP-1 adaptor complex subunit beta, putative [Source:UniProtKB/TrEMBL;Acc:B8MZV4]
CADAFLAG00001374	AFLA_085950	EQ963472	+	3685451–3686704		Alcohol dehydrogenase, putative [Source:UniProtKB/TrEMBL;Acc:B8MZV5]
CADAFLAG00001375	AFLA_085960	EQ963472	-	3687198-3689111	3686932-3689708	Cell surface protein, putative [Source:UniProtKB/TrEMBL;Acc:B8MZV6]
CADAFLAG00001376	AFLA_085970	EQ963472	+	3690828-3692513	3690788-3693135	DNA primase [Source:UniProtKB/TrEMBL;Acc:B8MZV7]
CADAFLAG00001377	AFLA_085980	EQ963472	-	3693037-3694319	3692415-3694405	Regulatory protein SUAPRGA1 [Source:UniProtKB/TrEMBL;Acc:B8MZV8]
CADAFLAG00001378	AFLA_085990	EQ963472	-	3695242–3695908		Translation machinery-associated protein, putative [Source:UniProtKB/TrEMBL;Acc:B8MZV9]
CADAFLAG00001379	AFLA_086000	EQ963472	+	3696402–3698755		Exonuclease, putative [Source:UniProtKB/TrEMBL;Acc:B8MZW0]
CADAFLAG00001380	AFLA_086010	EQ963472	+	3699952-3700941	3699302-3701413	Putative uncharacterized protein [Source:UniProtKB/TrEMBL;Acc:B8MZW1]
CADAFLAG00001381	AFLA_086020	EQ963472	-	3701463-3703364	3700849-3703364	Caffeine resistance protein, putative [Source:UniProtKB/TrEMBL;Acc:B8MZW2]
CADAFLAG00001382	AFLA_086030	EQ963472	-	3703917–3704570		Putative uncharacterized protein [Source:UniProtKB/TrEMBL;Acc:B8MZW3]
CADAFLAG00001383	AFLA_086040	EQ963472	-	3704948–3705263		Putative uncharacterized protein [Source:UniProtKB/TrEMBL;Acc:B8MZW4]
CADAFLAG00001384	AFLA_086050	EQ963472	-	3705357–3705926		Putative uncharacterized protein [Source:UniProtKB/TrEMBL;Acc:B8MZW5]
CADAFLAG00001385	AFLA_086060	EQ963472	+	3707280–3707887		Putative uncharacterized protein [Source:UniProtKB/TrEMBL;Acc:B8MZW6]
CADAFLAG00001386	AFLA_086070	EQ963472	+	3709170–3712169		Chitin synthase, putative [Source:UniProtKB/TrEMBL;Acc:B8MZW7]
CADAFLAG00001387	AFLA_086080	EQ963472	+	3712830–3714874		Restculine oxidase, putative [Source:UniProtKB/TrEMBL;Acc:B8MZW8]
CADAFLAG00001388	AFLA_086090	EQ963472	+	3717015–3717766		Putative uncharacterized protein [Source:UniProtKB/TrEMBL;Acc:B8MZW9]
CADAFLAG00001389	AFLA_086100	EQ963472	+	3718858-3719574	3718588-3721448	Putative uncharacterized protein [Source:UniProtKB/TrEMBL;Acc:B8MZX0]
CADAFLAG00001390	AFLA_086110	EQ963472	+	3720594–3721251		C6 transcription factor, putative [Source:UniProtKB/TrEMBL;Acc:B8MZX1]
CADAFLAG00001391	AFLA_086120	EQ963472	-	3721764-3722018	3721589-3722173	Putative uncharacterized protein [Source:UniProtKB/TrEMBL;Acc:B8MZX2]
CADAFLAG00001392	AFLA_086130	EQ963472	-	3722981–3723514		NUDIX domain, putative [Source:UniProtKB/TrEMBL;Acc:B8MZX3]
CADAFLAG00001393	AFLA_086140	EQ963472	-	3724280–3724696		Putative uncharacterized protein [Source:UniProtKB/TrEMBL;Acc:B8MZX4]
CADAFLAG00001394	AFLA_086150	EQ963472	+	3724917-3726670	3724917-3727124	Putative uncharacterized protein [Source:UniProtKB/TrEMBL;Acc:B8MZX5]
CADAFLAG00001395	AFLA_086160	EQ963472	+	3727248–3729088		Tripeptidyl peptidase SED3 [Source:UniProtKB/TrEMBL;Acc:B8MZX6]
CADAFLAG00001396	AFLA_086170	EQ963472	+	3729553-3730457	3729421-3730457	Proteasome regulatory particle subunit (RpnL), putative [Source:UniProtKB/TrEMBL;Acc:B8MZX7]
CADAFLAG00001397	AFLA_086180	EQ963472	-	3730602-3732010	3730359-3734229	Putative uncharacterized protein [Source:UniProtKB/TrEMBL;Acc:B8MZX8]
CADAFLAG00001398	AFLA_086190	EQ963472	-	3732355–3733313		5-carboxymethyl-2-hydroxymuconate semialdehyde dehydrogenase, putative [Source:UniProtKB/TrEMBL;Acc:B8MZX9]
CADAFLAG00001399	AFLA_086200	EQ963472	-	3733334–3733904		Betaine-aldehyde dehydrogenase, putative [Source:UniProtKB/TrEMBL;Acc:B8MZY0]
CADAFLAG00001400	AFLA_086210	EQ963472	+	3734512-3736197	3734428-3736300	Epoxide hydrolase, putative [Source:UniProtKB/TrEMBL;Acc:B8MZY1]
CADAFLAG00001401	AFLA_086220	EQ963472	+	3736665-3737699	3736389-3738236	Putative uncharacterized protein [Source:UniProtKB/TrEMBL;Acc:B8MZY2]
CADAFLAG00001402	AFLA_086230	EQ963472	-	3738140-3739015	3737602-3739113	Putative uncharacterized protein [Source:UniProtKB/TrEMBL;Acc:B8MZY3]
CADAFLAG00001403	AFLA_086240	EQ963472	+	3739250–3739981		RecQ-mediated genome instability protein, putative [Source:UniProtKB/TrEMBL;Acc:B8MZY4]
CADAFLAG00001404	AFLA_086250	EQ963472	-	3740157–3744551		Translation repressor/antiviral protein Ski3, putative [Source:UniProtKB/TrEMBL;Acc:B8MZY5]
CADAFLAG00001405	AFLA_086260	EQ963472	+	3745016–3747486		Glycosyl hydrolase, putative [Source:UniProtKB/TrEMBL;Acc:B8MZY6]
CADAFLAG00001406	AFLA_086270	EQ963472	+	3748487-3752788	3744487-3753756	Nuclear import and export protein Msn5, putative [Source:UniProtKB/TrEMBL;Acc:B8MZY7]
CADAFLAG00001407	AFLA_086280	EQ963472	-	3753100-3753739	3752941-3753780	NADH-ubiquinone oxidoreductase subunit GRIM-19, putative [Source:UniProtKB/TrEMBL;Acc:B8MZY8]
CADAFLAG00001408	AFLA_086290	EQ963472	+	3754006–3755199		tRNA m(1)G methyltransferase domain containing protein [Source:UniProtKB/TrEMBL;Acc:B8MZY9]
CADAFLAG00001409	AFLA_086300	EQ963472	+	3755660-3758459	3753956-3758459	Vacuolar import and degRadation protein, putative [Source:UniProtKB/TrEMBL;Acc:B8MZZ0]
CADAFLAG00001410	AFLA_086310	EQ963472	-	3758862–3759968		Oxidative stress response protein Oxr1, putative [Source:UniProtKB/TrEMBL;Acc:B8MZZ1]
CADAFLAG00001411	AFLA_086320	EQ963472	-	3760498-3762224	3758207-3762997	Endosome-associated ubiquitin isopeptidase (AmsH), putative [Source:UniProtKB/TrEMBL;Acc:B8MZZ2]
CADAFLAG00001412	AFLA_086330	EQ963472	+	3762760-3764674	3762129-3767148	Putative uncharacterized protein [Source:UniProtKB/TrEMBL;Acc:B8MZZ3]
CADAFLAG00001413	AFLA_086340	EQ963472	-	3769705–3770343		Putative uncharacterized protein [Source:UniProtKB/TrEMBL;Acc:B8MZZ4]
CADAFLAG00001414	AFLA_086350	EQ963472	-	3770789-3771740	3770724-3771860	Putative uncharacterized protein [Source:UniProtKB/TrEMBL;Acc:B8MZZ5]
CADAFLAG00001415	AFLA_086360	EQ963472	+	3773512–3774825		Probable exopolygalacturonase C [Source:UniProtKB/Swiss-Prot;Acc:B8MZZ6]
CADAFLAG00001416	AFLA_086370	EQ963472	+	3775246–3776283		Putative uncharacterized protein [Source:UniProtKB/TrEMBL;Acc:B8MZZ7]
CADAFLAG00001417	AFLA_086380	EQ963472	+	3776560–3776993		Putative uncharacterized protein [Source:UniProtKB/TrEMBL;Acc:B8MZZ8]
CADAFLAG00001418	AFLA_086390	EQ963472	-	3777165-3778205	3777099-3778272	Putative uncharacterized protein [Source:UniProtKB/TrEMBL;Acc:B8MZZ9]
CADAFLAG00001419	AFLA_086400	EQ963472	-	3778580-3780973	3778574-3785942	Isocitrate dehydrogenase [NADP] [Source:UniProtKB/TrEMBL;Acc:B8N000]
CADAFLAG00001420	AFLA_086410	EQ963472	-	3782147–3785518		C1 tetrahydrofolate synthase, putative [Source:UniProtKB/TrEMBL;Acc:B8N001]
CADAFLAG00001421	AFLA_086420	EQ963472	+	3786231-3787443	3785994-3788165	Eukaryotic translation initiation factor 3 subunit I [Source:UniProtKB/TrEMBL;Acc:B8N002]
CADAFLAG00001422	AFLA_086430	EQ963472	-	3788070-3788619	3787345-3788863	Coactivator bridging factor 1 (Mbf1), putative [Source:UniProtKB/TrEMBL;Acc:B8N003]
CADAFLAG00001423	AFLA_086440	EQ963472	+	3790600–3791532		SH3 domain protein [Source:UniProtKB/TrEMBL;Acc:B8N004]
CADAFLAG00001424	AFLA_086450	EQ963472	+	3792492–3793375		Putative uncharacterized protein [Source:UniProtKB/TrEMBL;Acc:B8N005]
CADAFLAG00001425	AFLA_086460	EQ963472	+	3793953–3795959		M-phase phosphoprotein, putative [Source:UniProtKB/TrEMBL;Acc:B8N006]
CADAFLAG00001426	AFLA_086470	EQ963472	+	3797574–3798050		DUF124 domain protein [Source:UniProtKB/TrEMBL;Acc:B8N007]
CADAFLAG00001427	AFLA_086480	EQ963472	-	3798311–3800081		Translational initiation factor 2 beta [Source:UniProtKB/TrEMBL;Acc:B8N008]
CADAFLAG00001428	AFLA_086490	EQ963472	+	3800457-3800884	3800278-3801546	Putative uncharacterized protein [Source:UniProtKB/TrEMBL;Acc:B8N009]
CADAFLAG00001429	AFLA_086500	EQ963472	-	3801452-3802021	3800786-3802021	Putative uncharacterized protein [Source:UniProtKB/TrEMBL;Acc:B8N010]
CADAFLAG00001430	AFLA_086510	EQ963472	-	3804685–3807795		Putative uncharacterized protein [Source:UniProtKB/TrEMBL;Acc:B8N011]
CADAFLAG00001431	AFLA_086520	EQ963472	-	3809237–3810559		Putative uncharacterized protein [Source:UniProtKB/TrEMBL;Acc:B8N012]
CADAFLAG00001432	AFLA_086530	EQ963472	-	3812069-3816167	3812069-3816242	Ariadne RING finger, putative [Source:UniProtKB/TrEMBL;Acc:B8N013]
CADAFLAG00001433	AFLA_086540	EQ963472	+	3817335-3818404	3817203-3818644	Glycine-rich RNA-binding protein, putative [Source:UniProtKB/TrEMBL;Acc:B8N014]
CADAFLAG00001434	AFLA_086550	EQ963472	-	3818555-3819163	3818555-3819297	Putative uncharacterized protein [Source:UniProtKB/TrEMBL;Acc:B8N015]
CADAFLAG00001435	AFLA_086560	EQ963472	+	3820287–3821370		Short-chain dehydrogenase/reductase family protein, putative [Source:UniProtKB/TrEMBL;Acc:B8N016]
CADAFLAG00001436	AFLA_086570	EQ963472	+	3821846–3823302		Calcium binding modulator protein (Alg2), putative [Source:UniProtKB/TrEMBL;Acc:B8N017]
CADAFLAG00001437	AFLA_086580	EQ963472	+	3823695-3826491	3820087-3827566	MFS drug transporter, putative [Source:UniProtKB/TrEMBL;Acc:B8N018]
CADAFLAG00001438	AFLA_086590	EQ963472	-	3827471-3829494	3826799-3830132	Transcription factor smp1, putative [Source:UniProtKB/TrEMBL;Acc:B8N019]
CADAFLAG00001439	AFLA_086600	EQ963472	+	3832417-3835819	3831499-3836433	Morphogenesis protein (Msb1), putative [Source:UniProtKB/TrEMBL;Acc:B8N020]
CADAFLAG00001440	AFLA_086610	EQ963472	-	3836882–3837274		Putative uncharacterized protein [Source:UniProtKB/TrEMBL;Acc:B8N021]
CADAFLAG00001441	AFLA_086620	EQ963472	-	3840027-3842016	3836633-3842539	Glucose-6-phosphate 1-dehydrogenase [Source:UniProtKB/TrEMBL;Acc:B8N022]
CADAFLAG00001442	AFLA_086630	EQ963472	+	3844806-3845594	3843947-3846477	60S ribosomal protein L35Ae [Source:UniProtKB/TrEMBL;Acc:B8N023]
CADAFLAG00001443	AFLA_086640	EQ963472	+	3849710-3851157	3848636-3853249	Putative uncharacterized protein [Source:UniProtKB/TrEMBL;Acc:B8N024]
CADAFLAG00001444	AFLA_086650	EQ963472	-	3851968–3852634		Putative uncharacterized protein [Source:UniProtKB/TrEMBL;Acc:B8N025]
CADAFLAG00001445	AFLA_086660	EQ963472	-	3853151-3854933	3851059-3855665	Mitochondrial phosphate carrier protein, putative [Source:UniProtKB/TrEMBL;Acc:B8N026]
CADAFLAG00001446	AFLA_086670	EQ963472	+	3855378–3856007		Cystathionine beta-synthase (Beta-thionase), putative [Source:UniProtKB/TrEMBL;Acc:B8N027]
CADAFLAG00001447	AFLA_086680	EQ963472	-	3856423-3857001	3855909-3857195	Putative uncharacterized protein [Source:UniProtKB/TrEMBL;Acc:B8N028]
CADAFLAG00001448	AFLA_086690	EQ963472	+	3857662-3861042	3857559-3862015	SNF2 family helicase/ATPase, putative [Source:UniProtKB/TrEMBL;Acc:B8N029]
CADAFLAG00001449	AFLA_086700	EQ963472	-	3861920-3862465	3860950-3862486	tRNA dihydrouridine synthase (Smm1), putative [Source:UniProtKB/TrEMBL;Acc:B8N030]
CADAFLAG00001450	AFLA_086710	EQ963472	+	3864190–3865613		Inorganic diphosphatase, putative [Source:UniProtKB/TrEMBL;Acc:B8N031]
CADAFLAG00001451	AFLA_086720	EQ963472	-	3866039–3866667		Putative uncharacterized protein [Source:UniProtKB/TrEMBL;Acc:B8N032]
CADAFLAG00001452	AFLA_086730	EQ963472	+	3867363–3868375		DNA replication factor C subunit Rfc2, putative [Source:UniProtKB/TrEMBL;Acc:B8N033]
CADAFLAG00001453	AFLA_086740	EQ963472	+	3868897-3870383	3867211-3870490	4-nitrophenylphosphatase [Source:UniProtKB/TrEMBL;Acc:B8N034]
CADAFLAG00001454	AFLA_086750	EQ963472	-	3870453-3871733	3870289-3871774	Putative uncharacterized protein [Source:UniProtKB/TrEMBL;Acc:B8N035]
CADAFLAG00001455	AFLA_086760	EQ963472	+	3871979-3873017	3871799-3873017	ATP-dependent Clp protease proteolytic subunit [Source:UniProtKB/TrEMBL;Acc:B8N036]
CADAFLAG00001456	AFLA_086770	EQ963472	-	3873334-3874416	3873334-3874507	Putative uncharacterized protein [Source:UniProtKB/TrEMBL;Acc:B8N037]
CADAFLAG00001457	AFLA_086780	EQ963472	-	3874883-3876676	3874883-3876709	Aspartyl aminopeptidase [Source:UniProtKB/TrEMBL;Acc:B8N038]
CADAFLAG00001458	AFLA_086790	EQ963472	+	3878638-3880658	3878097-3881890	Cell cycle regulatory protein (Srw1), putative [Source:UniProtKB/TrEMBL;Acc:B8N039]
CADAFLAG00001459	AFLA_086800	EQ963472	-	3881792-3882853	3880560-3883698	Epoxide hydrolase, putative [Source:UniProtKB/TrEMBL;Acc:B8N040]
CADAFLAG00001460	AFLA_086810	EQ963472	+	3883427–3884544		Aldo/keto reductase, putative [Source:UniProtKB/TrEMBL;Acc:B8N041]
CADAFLAG00001461	AFLA_086820	EQ963472	-	3885396-3886384	3884837-3886609	Pyruvate dehydrogenase complex component Pdx1, putative [Source:UniProtKB/TrEMBL;Acc:B8N042]
CADAFLAG00001462	AFLA_086830	EQ963472	+	3886980-3887792	3886212-3887975	Putative uncharacterized protein [Source:UniProtKB/TrEMBL;Acc:B8N043]
CADAFLAG00001463	AFLA_086840	EQ963472	+	3888381-3892338	3888110-3892505	Structural maintenance of chromosomes protein [Source:UniProtKB/TrEMBL;Acc:B8N044]
CADAFLAG00001464	AFLA_086850	EQ963472	+	3896691-3898466	3896518-3899982	Putative uncharacterized protein [Source:UniProtKB/TrEMBL;Acc:B8N045]
CADAFLAG00001465	AFLA_086860	EQ963472	-	3899884-3900944	3898795-3901246	NUDIX domain protein [Source:UniProtKB/TrEMBL;Acc:B8N046]
CADAFLAG00001466	AFLA_086870	EQ963472	-	3901903–3903690		MRS7 family protein [Source:UniProtKB/TrEMBL;Acc:B8N047]
CADAFLAG00001467	AFLA_086880	EQ963472	-	3904234-3906289	3898795-3906781	Putative uncharacterized protein [Source:UniProtKB/TrEMBL;Acc:B8N048]
CADAFLAG00001468	AFLA_086890	EQ963472	+	3912444–3913611		Putative uncharacterized protein [Source:UniProtKB/TrEMBL;Acc:B8N049]
CADAFLAG00001469	AFLA_086900	EQ963472	+	3914550–3918163		Alpha-mannosidase [Source:UniProtKB/TrEMBL;Acc:B8N050]
CADAFLAG00001470	AFLA_086910	EQ963472	-	3918336–3919176		Spac6f6.09 protein, putative [Source:UniProtKB/TrEMBL;Acc:B8N051]
CADAFLAG00001471	AFLA_086920	EQ963472	+	3919589-3920416	3918933-3920680	Ctr copper transporter family protein [Source:UniProtKB/TrEMBL;Acc:B8N052]
CADAFLAG00001472	AFLA_086930	EQ963472	-	3920585-3922283	3919427-3922462	F-box and JmjC domain protein, putative [Source:UniProtKB/TrEMBL;Acc:B8N053]
CADAFLAG00001473	AFLA_086940	EQ963472	+	3922853-3925212	3922755-3925212	Eukaryotic translation initiation factor 4, putative [Source:UniProtKB/TrEMBL;Acc:B8N054]
CADAFLAG00001474	AFLA_086950	EQ963472	+	3925363–3926550		Putative uncharacterized protein [Source:UniProtKB/TrEMBL;Acc:B8N055]
CADAFLAG00001475	AFLA_086960	EQ963472	-	3926668-3927469	3926557-3927634	Fumarylacetoacetate hydrolase family protein [Source:UniProtKB/TrEMBL;Acc:B8N056]
CADAFLAG00001476	AFLA_086970	EQ963472	+	3928105–3928527		Putative uncharacterized protein [Source:UniProtKB/TrEMBL;Acc:B8N057]
CADAFLAG00001477	AFLA_086980	EQ963472	+	3929090-3930683	3929061-3931455	PWI domain mRNA processing protein, putative [Source:UniProtKB/TrEMBL;Acc:B8N058]
CADAFLAG00001478	AFLA_086990	EQ963472	-	3932110-3934557	3931772-3935721	Cell wall protein, putative [Source:UniProtKB/TrEMBL;Acc:B8N059]
CADAFLAG00001479	AFLA_087000	EQ963472	+	3938246-3940762	3937875-3941353	Checkpoint protein kinase, putative [Source:UniProtKB/TrEMBL;Acc:B8N060]
CADAFLAG00001480	AFLA_087010	EQ963472	-	3941301–3941760		Putative uncharacterized protein [Source:UniProtKB/TrEMBL;Acc:B8N061]
CADAFLAG00001481	AFLA_087020	EQ963472	-	3942041–3942465		Putative uncharacterized protein [Source:UniProtKB/TrEMBL;Acc:B8N062]
CADAFLAG00001482	AFLA_087030	EQ963472	-	3942646–3943071		Putative uncharacterized protein [Source:UniProtKB/TrEMBL;Acc:B8N063]
CADAFLAG00001483	AFLA_087040	EQ963472	-	3944161-3945399	3943970-3945424	60S ribosomal protein Nsa2, putative [Source:UniProtKB/TrEMBL;Acc:B8N064]
CADAFLAG00001484	AFLA_087050	EQ963472	+	3945847-3946563	3945551-3946944	Aconitate hydratase, putative [Source:UniProtKB/TrEMBL;Acc:B8N065]
CADAFLAG00001485	AFLA_087060	EQ963472	-	3946994–3948880		GMC oxidoreductase, putative [Source:UniProtKB/TrEMBL;Acc:B8N066]
CADAFLAG00001486	AFLA_087070	EQ963472	-	3949958–3951310		DUF1338 domain protein [Source:UniProtKB/TrEMBL;Acc:B8N067]
CADAFLAG00001487	AFLA_087080	EQ963472	+	3953623-3955931	3953111-3956173	Putative uncharacterized protein [Source:UniProtKB/TrEMBL;Acc:B8N068]
CADAFLAG00001488	AFLA_087090	EQ963472	-	3956565-3958794	3955932-3960013	C6 transcription factor (OTam), putative [Source:UniProtKB/TrEMBL;Acc:B8N069]
CADAFLAG00001489	AFLA_087100	EQ963472	+	3961978–3962916		Benzoate 4-monooxygenase cytochrome P450, putative [Source:UniProtKB/TrEMBL;Acc:B8N070]
CADAFLAG00001490	AFLA_087110	EQ963472	-	3963906–3964568		Polymerase (RNA) II (DNA directed) polypeptide D [Source:UniProtKB/TrEMBL;Acc:B8N071]
CADAFLAG00001491	AFLA_087120	EQ963472	-	3964953-3966552	3963330-3968252	tRNA (guanine(37)-N1)-methyltransferase [Source:UniProtKB/TrEMBL;Acc:B8N072]
CADAFLAG00001492	AFLA_087130	EQ963472	-	3967032–3968093		Putative uncharacterized protein [Source:UniProtKB/TrEMBL;Acc:B8N073]
CADAFLAG00001493	AFLA_087140	EQ963472	-	3968502-3971678	3968383-3972166	PX domain protein [Source:UniProtKB/TrEMBL;Acc:B8N074]
CADAFLAG00001494	AFLA_087150	EQ963472	+	3973088–3973594		Putative uncharacterized protein [Source:UniProtKB/TrEMBL;Acc:B8N075]
CADAFLAG00001495	AFLA_087160	EQ963472	+	3974187-3977146	3973915-3977146	Probable dipeptidyl-aminopeptidase B [Source:UniProtKB/Swiss-Prot;Acc:B8N076]
CADAFLAG00001496	AFLA_087170	EQ963472	+	3988749–3991196		Extracellular serine-rich protein, putative [Source:UniProtKB/TrEMBL;Acc:B8N077]
CADAFLAG00001497	AFLA_087180	EQ963472	+	3994754-3995716	3993810-3995859	Endo alpha-1,4 polygalactosaminidase, putative [Source:UniProtKB/TrEMBL;Acc:B8N078]
CADAFLAG00001498	AFLA_087190	EQ963472	-	3998286–3998900		Putative uncharacterized protein [Source:UniProtKB/TrEMBL;Acc:B8N079]
CADAFLAG00001499	AFLA_087210	EQ963472	-	4000032-4001904	3999597-4003058	Cell surface spherulin 4 family protein [Source:UniProtKB/TrEMBL;Acc:B8N080]
CADAFLAG00001500	AFLA_087220	EQ963472	+	4002962-4004247	4001531-4004821	UDP-glucose 4-epimerase, putative [Source:UniProtKB/TrEMBL;Acc:B8N081]
CADAFLAG00001501	AFLA_087230	EQ963472	+	4006552-4007341	4006423-4007341	Putative uncharacterized protein [Source:UniProtKB/TrEMBL;Acc:B8N082]
CADAFLAG00001502	AFLA_087240	EQ963472	-	4007647-4008540	4007245-4008540	Glutathione S-transferase, putative [Source:UniProtKB/TrEMBL;Acc:B8N083]
CADAFLAG00001503	AFLA_087250	EQ963472	+	4009029-4012294	4008737-4014198	Phosphoinositide-specific phospholipase C, putative [Source:UniProtKB/TrEMBL;Acc:B8N084]
CADAFLAG00001504	AFLA_087260	EQ963472	+	4016215-4016614	4015937-4016705	Putative uncharacterized protein [Source:UniProtKB/TrEMBL;Acc:B8N085]
CADAFLAG00001505	AFLA_087270	EQ963472	-	4016893-4018780	4016893-4019096	Transporter, putative [Source:UniProtKB/TrEMBL;Acc:B8N086]
CADAFLAG00001506	AFLA_087280	EQ963472	+	4020334-4021743	4020334-4022118	Alpha-ketoglutarate-dependent taurine dioxygenase [Source:UniProtKB/TrEMBL;Acc:B8N087]
CADAFLAG00001507	AFLA_087290	EQ963472	-	4022154–4022483		Putative uncharacterized protein [Source:UniProtKB/TrEMBL;Acc:B8N088]
CADAFLAG00001508	AFLA_087300	EQ963472	-	4024063-4024839	4022024-4024861	Putative uncharacterized protein [Source:UniProtKB/TrEMBL;Acc:B8N089]
CADAFLAG00001509	AFLA_087310	EQ963472	-	4025369–4026785		Putative uncharacterized protein [Source:UniProtKB/TrEMBL;Acc:B8N090]
CADAFLAG00001510	AFLA_087320	EQ963472	-	4027154-4029933	4025059-4035915	GABA permease GabA [Source:UniProtKB/TrEMBL;Acc:B8N091]
CADAFLAG00001511	AFLA_087330	EQ963472	-	4031452–4035054		Peroxisome biosynthesis protein (PAS8/Peroxin-6), putative [Source:UniProtKB/TrEMBL;Acc:B8N092]
CADAFLAG00001512	AFLA_087340	EQ963472	+	4036687-4038058	4036120-4038825	Putative uncharacterized protein [Source:UniProtKB/TrEMBL;Acc:B8N093]
CADAFLAG00001513	AFLA_087350	EQ963472	+	4039158–4042143		C2H2 transcription factor (Ace1), putative [Source:UniProtKB/TrEMBL;Acc:B8N094]
CADAFLAG00001514	AFLA_087360	EQ963472	-	4042636-4044292	4042550-4044530	ThiF domain protein, putative [Source:UniProtKB/TrEMBL;Acc:B8N095]
CADAFLAG00001515	AFLA_087370	EQ963472	-	4045932-4046804	4044707-4047214	Transcription/RNA-processing factor Ssu72 [Source:UniProtKB/TrEMBL;Acc:B8N096]
CADAFLAG00001516	AFLA_087380	EQ963472	+	4047695–4048464		Isochorismatase family hydrolase, putative [Source:UniProtKB/TrEMBL;Acc:B8N097]
CADAFLAG00001517	AFLA_087390	EQ963472	+	4049326–4050322		Putative uncharacterized protein [Source:UniProtKB/TrEMBL;Acc:B8N098]
CADAFLAG00001518	AFLA_087400	EQ963472	+	4052179-4053700	4047393-4054186	Oxysterol binding protein (Osh7), putative [Source:UniProtKB/TrEMBL;Acc:B8N099]
CADAFLAG00001519	AFLA_087410	EQ963472	-	4054449-4055909	4053312-4056734	Histone deacetylase [Source:UniProtKB/TrEMBL;Acc:B8N0A0]
CADAFLAG00001520	AFLA_087420	EQ963472	+	4056468–4057426		Carboxyphosphonoenolpyruvate phosphonomutase, putative [Source:UniProtKB/TrEMBL;Acc:B8N0A1]
CADAFLAG00001521	AFLA_087430	EQ963472	+	4060096-4061067	4059574-4062333	Allergen Asp F4 [Source:UniProtKB/TrEMBL;Acc:B8N0A2]
CADAFLAG00001522	AFLA_087440	EQ963472	-	4062242-4063700	4060969-4066595	Mitochondrial import receptor subunit (Tom37), putative [Source:UniProtKB/TrEMBL;Acc:B8N0A3]
CADAFLAG00001523	AFLA_087450	EQ963472	-	4074486-4075317	4073612-4075430	Putative uncharacterized protein [Source:UniProtKB/TrEMBL;Acc:B8N0A4]
CADAFLAG00001524	AFLA_087460	EQ963472	+	4075407–4075871		Putative uncharacterized protein [Source:UniProtKB/TrEMBL;Acc:B8N0A5]
CADAFLAG00001525	AFLA_087470	EQ963472	+	4077064–4078134		Plasma membrane low affinity zinc ion transporter, putative [Source:UniProtKB/TrEMBL;Acc:B8N0A6]
CADAFLAG00001526	AFLA_087480	EQ963472	+	4078611–4079107		Peptidyl-prolyl cis-trans isomerase [Source:UniProtKB/TrEMBL;Acc:B8N0A7]
CADAFLAG00001527	AFLA_087490	EQ963472	-	4079359–4080399		Heme/steroid binding protein, putative [Source:UniProtKB/TrEMBL;Acc:B8N0A8]
CADAFLAG00001528	AFLA_087500	EQ963472	+	4081817-4084401	4080933-4084654	ATP-dependent DNA helicase, putative [Source:UniProtKB/TrEMBL;Acc:B8N0A9]
CADAFLAG00001529	AFLA_087510	EQ963472	+	4087642-4087951	4086406-4088015	Putative uncharacterized protein [Source:UniProtKB/TrEMBL;Acc:B8N0B0]
CADAFLAG00001530	AFLA_087520	EQ963472	-	4090527-4091845	4089523-4094165	G1/S-specific cyclin Cln1, putative [Source:UniProtKB/TrEMBL;Acc:B8N0B1]
CADAFLAG00001531	AFLA_087530	EQ963472	+	4103827–4106805		Small nucleolar ribonucleoprotein complex subunit, putative [Source:UniProtKB/TrEMBL;Acc:B8N0B2]
CADAFLAG00001532	AFLA_087540	EQ963472	+	4108256–4110077		Putative uncharacterized protein [Source:UniProtKB/TrEMBL;Acc:B8N0B3]
CADAFLAG00001533	AFLA_087550	EQ963472	-	4110291-4112771	4110194-4115761	Serine/threonine-protein phosphatase [Source:UniProtKB/TrEMBL;Acc:B8N0B4]
CADAFLAG00001534	AFLA_087560	EQ963472	-	4115005–4115477		Putative uncharacterized protein [Source:UniProtKB/TrEMBL;Acc:B8N0B5]
CADAFLAG00001535	AFLA_087570	EQ963472	-	4116380–4117002		Putative uncharacterized protein [Source:UniProtKB/TrEMBL;Acc:B8N0B6]
CADAFLAG00001536	AFLA_087580	EQ963472	+	4117890-4119105	4117752-4119129	DUF52 domain protein [Source:UniProtKB/TrEMBL;Acc:B8N0B7]
CADAFLAG00001537	AFLA_087590	EQ963472	+	4121020–4122657		Alpha-1,3-glucanase/mutanase, putative [Source:UniProtKB/TrEMBL;Acc:B8N0B8]
CADAFLAG00001538	AFLA_087600	EQ963472	+	4123723-4124834	4123114-4125108	Putative uncharacterized protein [Source:UniProtKB/TrEMBL;Acc:B8N0B9]
CADAFLAG00001539	AFLA_087610	EQ963472	-	4127469-4128965	4126369-4133335	Peptidase (PNG1), putative [Source:UniProtKB/TrEMBL;Acc:B8N0C0]
CADAFLAG00001540	AFLA_087620	EQ963472	+	4133238-4134284	4132983-4134284	NmrA family transcriptional regulator, putative [Source:UniProtKB/TrEMBL;Acc:B8N0C1]
CADAFLAG00001541	AFLA_087630	EQ963472	-	4134689–4136399		Alpha,alpha-trehalose-phosphate synthase subunit, putative [Source:UniProtKB/TrEMBL;Acc:B8N0C2]
CADAFLAG00001542	AFLA_087640	EQ963472	+	4137605-4140490	4136806-4141458	Alpha,alpha-trehalose phosphate synthase subunit, putative [Source:UniProtKB/TrEMBL;Acc:B8N0C3]
CADAFLAG00001543	AFLA_087650	EQ963472	-	4141360-4143855	4140393-4144258	Chromatin assembly factor 1 subunit B, putative [Source:UniProtKB/TrEMBL;Acc:B8N0C4]
CADAFLAG00001544	AFLA_087660	EQ963472	-	4144703-4145742	4144703-4146044	Putative uncharacterized protein [Source:UniProtKB/TrEMBL;Acc:B8N0C5]
CADAFLAG00001545	AFLA_087670	EQ963472	+	4146239-4149506	4146239-4150005	Triadin, putative [Source:UniProtKB/TrEMBL;Acc:B8N0C6]
CADAFLAG00001546	AFLA_087680	EQ963472	+	4150472–4151584		NADH:flavin oxidoreductase/NADH oxidase family protein [Source:UniProtKB/TrEMBL;Acc:B8N0C7]
CADAFLAG00001547	AFLA_087690	EQ963472	+	4152067-4152470	4152067-4153916	Putative uncharacterized protein [Source:UniProtKB/TrEMBL;Acc:B8N0C8]
CADAFLAG00001548	AFLA_087700	EQ963472	+	4153448–4153916		Putative uncharacterized protein [Source:UniProtKB/TrEMBL;Acc:B8N0C9]
CADAFLAG00001549	AFLA_087710	EQ963472	+	4158143-4159116	4157084-4159441	GPR/FUN34 family protein [Source:UniProtKB/TrEMBL;Acc:B8N0D0]
CADAFLAG00001550	AFLA_087720	EQ963472	-	4161097–4161660		Putative uncharacterized protein [Source:UniProtKB/TrEMBL;Acc:B8N0D1]
CADAFLAG00001551	AFLA_087730	EQ963472	-	4162030-4163220	4159018-4164005	Putative uncharacterized protein [Source:UniProtKB/TrEMBL;Acc:B8N0D2]
CADAFLAG00001552	AFLA_087740	EQ963472	-	4164220–4166728		ENTH domain protein [Source:UniProtKB/TrEMBL;Acc:B8N0D3]
CADAFLAG00001553	AFLA_087750	EQ963472	+	4168658–4169785		Putative uncharacterized protein [Source:UniProtKB/TrEMBL;Acc:B8N0D4]
CADAFLAG00001554	AFLA_087760	EQ963472	-	4170027–4171397		40S ribosomal protein S11 [Source:UniProtKB/TrEMBL;Acc:B8N0D5]
CADAFLAG00001555	AFLA_087770	EQ963472	+	4174289-4176606	4171590-4177086	Chromosome segregation protein Spc105, putative [Source:UniProtKB/TrEMBL;Acc:B8MW87]
CADAFLAG00001556	AFLA_087780	EQ963472	-	4176988–4177308		Putative uncharacterized protein [Source:UniProtKB/TrEMBL;Acc:B8MW88]
CADAFLAG00001557	AFLA_087790	EQ963472	-	4177948-4180746	4176513-4184397	C6 transcription factor, putative [Source:UniProtKB/TrEMBL;Acc:B8MW89]
CADAFLAG00001558	AFLA_087800	EQ963472	+	4180878–4181260		Putative uncharacterized protein [Source:UniProtKB/TrEMBL;Acc:B8MW90]
CADAFLAG00001559	AFLA_087810	EQ963472	+	4185767-4187330	4184805-4188627	BZIP transcription factor, putative [Source:UniProtKB/TrEMBL;Acc:B8MW91]
CADAFLAG00001560	AFLA_087820	EQ963472	-	4189783-4191067	4187232-4195847	Cell wall integrity signaling protein Lsp1/Pil1, putative [Source:UniProtKB/TrEMBL;Acc:B8MW92]
CADAFLAG00001561	AFLA_087830	EQ963472	-	4192180–4195587		DNA excision repair protein Rad2 [Source:UniProtKB/TrEMBL;Acc:B8MW93]
CADAFLAG00001562	AFLA_087840	EQ963472	+	4196481-4199616	4195932-4199689	WD repeat protein [Source:UniProtKB/TrEMBL;Acc:B8MW94]
CADAFLAG00001563	AFLA_087850	EQ963472	+	4199884–4201343		Putative uncharacterized protein [Source:UniProtKB/TrEMBL;Acc:B8MW95]
CADAFLAG00001564	AFLA_087860	EQ963472	+	4202097–4203362		Cellulose-binding GDSL lipase/acylhydrolase, putative [Source:UniProtKB/TrEMBL;Acc:B8MW96]
CADAFLAG00001565	AFLA_087870	EQ963472	+	4204159-4205532	4201804-4206555	probable endo-beta-1,4-glucanase B [Source:UniProtKB/Swiss-Prot;Acc:B8MW97]
CADAFLAG00001566	AFLA_087880	EQ963472	+	4207040-4208069	4206682-4208396	Integral membrane protein [Source:UniProtKB/TrEMBL;Acc:B8MW98]
CADAFLAG00001567	AFLA_087890	EQ963472	-	4208837-4212566	4207973-4212789	Putative uncharacterized protein [Source:UniProtKB/TrEMBL;Acc:B8MW99]
CADAFLAG00001568	AFLA_087900	EQ963472	-	4222350-4224416	4221932-4225274	Pyruvate kinase [Source:UniProtKB/TrEMBL;Acc:B8MWA0]
CADAFLAG00001569	AFLA_087910	EQ963472	+	4225401-4226292	4225401-4227243	Putative uncharacterized protein [Source:UniProtKB/TrEMBL;Acc:B8MWA1]
CADAFLAG00001570	AFLA_087920	EQ963472	-	4227278-4228642	4226205-4228998	F-box domain protein [Source:UniProtKB/TrEMBL;Acc:B8MWA2]
CADAFLAG00001571	AFLA_087930	EQ963472	+	4230557–4232677		Putative uncharacterized protein [Source:UniProtKB/TrEMBL;Acc:B8MWA3]
CADAFLAG00001572	AFLA_087940	EQ963472	+	4233198-4234332	4230132-4234578	Putative uncharacterized protein [Source:UniProtKB/TrEMBL;Acc:B8MWA4]
CADAFLAG00001573	AFLA_087950	EQ963472	-	4234480–4235839		Isocitrate dehydrogenase LysB [Source:UniProtKB/TrEMBL;Acc:B8MWA5]
CADAFLAG00001574	AFLA_087960	EQ963472	+	4236738-4237140	4236406-4240002	Putative uncharacterized protein [Source:UniProtKB/TrEMBL;Acc:B8MWA6]
CADAFLAG00001575	AFLA_087970	EQ963472	+	4237243–4239060		Mucin-7, putative [Source:UniProtKB/TrEMBL;Acc:B8MWA7]
CADAFLAG00001576	AFLA_087980	EQ963472	-	4239905-4241519	4238964-4241654	RNA recognition motif-containing protein, putative [Source:UniProtKB/TrEMBL;Acc:B8MWA8]
CADAFLAG00001577	AFLA_087990	EQ963472	+	4242098–4242610		40S ribosomal protein S8 [Source:UniProtKB/TrEMBL;Acc:B8MWA9]
CADAFLAG00001578	AFLA_088000	EQ963472	+	4243481-4244403	4241817-4249314	NAD dependent epimerase/dehydratase, putative [Source:UniProtKB/TrEMBL;Acc:B8MWB0]
CADAFLAG00001579	AFLA_088010	EQ963472	-	4249217-4251007	4244308-4251156	Kynurenine 3-monooxygenase [Source:UniProtKB/TrEMBL;Acc:B8MWB1]
CADAFLAG00001580	AFLA_088020	EQ963472	+	4251510-4252873	4251394-4253046	Methionine aminopeptidase [Source:UniProtKB/TrEMBL;Acc:B8MWB2]
CADAFLAG00001581	AFLA_088030	EQ963472	+	4253697-4255420	4253437-4259676	MFS multidrug transporter, putative [Source:UniProtKB/TrEMBL;Acc:B8MWB3]
CADAFLAG00001582	AFLA_088040	EQ963472	+	4255906–4259205		EF hand domain protein [Source:UniProtKB/TrEMBL;Acc:B8MWB4]
CADAFLAG00001583	AFLA_088050	EQ963472	-	4259578–4261450		mRNA splicing factor (Prp17), putative [Source:UniProtKB/TrEMBL;Acc:B8MWB5]
CADAFLAG00001584	AFLA_088060	EQ963472	-	4261749–4263046		Endosomal cargo receptor (Erv14), putative [Source:UniProtKB/TrEMBL;Acc:B8MWB6]
CADAFLAG00001585	AFLA_088070	EQ963472	-	4264244-4267360	4263897-4267610	ABC transporter (Adp1), putative [Source:UniProtKB/TrEMBL;Acc:B8MWB7]
CADAFLAG00001586	AFLA_088080	EQ963472	+	4267903–4269433		Aspartate aminotransferase, putative [Source:UniProtKB/TrEMBL;Acc:B8MWB8]
CADAFLAG00001587	AFLA_088090	EQ963472	+	4269780-4271908	4267271-4272201	Long-chain fatty acid transporter, putative [Source:UniProtKB/TrEMBL;Acc:B8MWB9]
CADAFLAG00001588	AFLA_088100	EQ963472	-	4272153–4273936		Purine-cytosine permease, putative [Source:UniProtKB/TrEMBL;Acc:B8MWC0]
CADAFLAG00001589	AFLA_088110	EQ963472	+	4275875-4277041	4275875-4277121	Putative uncharacterized protein [Source:UniProtKB/TrEMBL;Acc:B8MWC1]
CADAFLAG00001590	AFLA_088120	EQ963472	-	4278443-4278896	4276753-4279307	Putative uncharacterized protein [Source:UniProtKB/TrEMBL;Acc:B8MWC2]
CADAFLAG00001591	AFLA_088130	EQ963472	+	4281950-4284439	4281573-4284577	C6 transcription factor, putative [Source:UniProtKB/TrEMBL;Acc:B8MWC3]
CADAFLAG00001592	AFLA_088140	EQ963472	+	4284750-4285499	4284647-4285929	Sreptomyces cyclase/dehydrase family protein [Source:UniProtKB/TrEMBL;Acc:B8MWC4]
CADAFLAG00001593	AFLA_088150	EQ963472	-	4285831-4286960	4285515-4287034	Fe superoxide dismutase, putative [Source:UniProtKB/TrEMBL;Acc:B8MWC5]
CADAFLAG00001594	AFLA_088160	EQ963472	+	4287645-4288853	4287184-4289222	Putative uncharacterized protein [Source:UniProtKB/TrEMBL;Acc:B8MWC6]
CADAFLAG00001595	AFLA_088170	EQ963472	-	4289135–4290970		GPI transamidase component PIG-S, putative [Source:UniProtKB/TrEMBL;Acc:B8MWC7]
CADAFLAG00001596	AFLA_088180	EQ963472	-	4291510–4292323		Fms interacting protein, putative [Source:UniProtKB/TrEMBL;Acc:B8MWC8]
CADAFLAG00001597	AFLA_088190	EQ963472	+	4293121-4294684	4292225-4295571	IZH family channel protein (Izh3), putative [Source:UniProtKB/TrEMBL;Acc:B8MWC9]
CADAFLAG00001598	AFLA_088200	EQ963472	-	4295473-4298051	4294592-4298686	R3H domain protein, putative [Source:UniProtKB/TrEMBL;Acc:B8MWD0]
CADAFLAG00001599	AFLA_088210	EQ963472	+	4298915-4299310	4298805-4300323	Putative uncharacterized protein [Source:UniProtKB/TrEMBL;Acc:B8MWD1]
CADAFLAG00001600	AFLA_088220	EQ963472	-	4300227-4300840	4300227-4300958	Cell cycle control protein cwf18, putative [Source:UniProtKB/TrEMBL;Acc:B8MWD2]
CADAFLAG00001601	AFLA_088230	EQ963472	+	4302475–4303602		Pentatricopeptide repeat protein [Source:UniProtKB/TrEMBL;Acc:B8MWD3]
CADAFLAG00001602	AFLA_088240	EQ963472	-	4302879–4304476		S-adenosylmethionine-dependent methyltransferase, putative [Source:UniProtKB/TrEMBL;Acc:B8MWD4]
CADAFLAG00001603	AFLA_088250	EQ963472	+	4304528-4305442	4303896-4306338	Transcription initiation factor TFIID subunit 13, putative [Source:UniProtKB/TrEMBL;Acc:B8MWD5]
CADAFLAG00001604	AFLA_088260	EQ963472	-	4306240-4307413	4305344-4308261	Eukaryotic translation initiation factor 3 subunit F [Source:UniProtKB/TrEMBL;Acc:B8MWD6]
CADAFLAG00001605	AFLA_088270	EQ963472	+	4309416–4310154		Nucleolus protein required for cell viability, putative [Source:UniProtKB/TrEMBL;Acc:B8MWD7]
CADAFLAG00001606	AFLA_088280	EQ963472	+	4310783-4312177	4310587-4312477	DUF6 domain protein, putative [Source:UniProtKB/TrEMBL;Acc:B8MWD8]
CADAFLAG00001607	AFLA_088290	EQ963472	+	4313004-4314131	4312841-4315229	Putative uncharacterized protein [Source:UniProtKB/TrEMBL;Acc:B8MWD9]
CADAFLAG00001608	AFLA_088300	EQ963472	-	4315132–4317316		Cholinephosphate cytidylyltransferase [Source:UniProtKB/TrEMBL;Acc:B8MWE0]
CADAFLAG00001609	AFLA_088310	EQ963472	-	4318755–4319072		Putative uncharacterized protein [Source:UniProtKB/TrEMBL;Acc:B8MWE1]
CADAFLAG00001610	AFLA_088320	EQ963472	-	4319148-4320367	4314069-4321609	Protein phosphatase 2C, putative [Source:UniProtKB/TrEMBL;Acc:B8MWE2]
CADAFLAG00001611	AFLA_088330	EQ963472	-	4322276-4323921	4321898-4324181	MFS transporter, putative [Source:UniProtKB/TrEMBL;Acc:B8MWE3]
CADAFLAG00001612	AFLA_088340	EQ963472	-	4327303-4331442	4327028-4331665	Putative uncharacterized protein [Source:UniProtKB/TrEMBL;Acc:B8MWE4]
CADAFLAG00001613	AFLA_088350	EQ963472	+	4334703-4337073	4333970-4337522	Hydrolase, alpha/beta fold family protein [Source:UniProtKB/TrEMBL;Acc:B8MWE5]
CADAFLAG00001614	AFLA_088360	EQ963472	+	4338370-4338935	4337700-4339100	Glutaredoxin domain protein [Source:UniProtKB/TrEMBL;Acc:B8MWE6]
CADAFLAG00001615	AFLA_088370	EQ963472	+	4339694-4340841	4339428-4343732	60S ribosomal protein L9, putative [Source:UniProtKB/TrEMBL;Acc:B8MWE7]
CADAFLAG00001616	AFLA_088380	EQ963472	+	4341492–4343499		Patatin-like serine hydrolase, putative [Source:UniProtKB/TrEMBL;Acc:B8MWE8]
CADAFLAG00001617	AFLA_088390	EQ963472	-	4344779-4347344	4343939-4347580	Transcription factor btf3, putative [Source:UniProtKB/TrEMBL;Acc:B8MWE9]
CADAFLAG00001618	AFLA_088400	EQ963472	-	4348908–4349939		Putative uncharacterized protein [Source:UniProtKB/TrEMBL;Acc:B8MWF0]
CADAFLAG00001619	AFLA_088410	EQ963472	-	4351735-4353385	4351019-4353690	Rhomboid family protein, putative [Source:UniProtKB/TrEMBL;Acc:B8MWF1]
CADAFLAG00001620	AFLA_088420	EQ963472	+	4354065-4354532	4353796-4355455	Putative uncharacterized protein [Source:UniProtKB/TrEMBL;Acc:B8MWF2]
CADAFLAG00001621	AFLA_088430	EQ963472	-	4355358-4356360	4354437-4356852	Protein kinase activator (Mob2), putative [Source:UniProtKB/TrEMBL;Acc:B8MWF3]
CADAFLAG00001622	AFLA_088440	EQ963472	+	4357236–4358763		RNA polymerase-associated protein LEO1, putative [Source:UniProtKB/TrEMBL;Acc:B8MWF4]
CADAFLAG00001623	AFLA_088450	EQ963472	-	4359255-4360589	4358666-4360685	C6 finger domain protein, putative [Source:UniProtKB/TrEMBL;Acc:B8MWF5]
CADAFLAG00001624	AFLA_088460	EQ963472	+	4360858-4363212	4360810-4363677	Ribosome biogenesis protein Erb1, putative [Source:UniProtKB/TrEMBL;Acc:B8MWF6]
CADAFLAG00001625	AFLA_088470	EQ963472	-	4363579–4365917		AAA family ATPase/60S ribosome export protein Rix7, putative [Source:UniProtKB/TrEMBL;Acc:B8MWF7]
CADAFLAG00001626	AFLA_088480	EQ963472	+	4366176-4367242	4365813-4367499	SNF7 family protein [Source:UniProtKB/TrEMBL;Acc:B8MWF8]
CADAFLAG00001627	AFLA_088490	EQ963472	-	4367406-4368410	4366138-4368565	DUF1000 domain protein [Source:UniProtKB/TrEMBL;Acc:B8MWF9]
CADAFLAG00001628	AFLA_088500	EQ963472	-	4369516-4371769	4369460-4371779	ATP dependent RNA helicase, putative [Source:UniProtKB/TrEMBL;Acc:B8MWG0]
CADAFLAG00001629	AFLA_088510	EQ963472	-	4371845–4372084		Putative uncharacterized protein [Source:UniProtKB/TrEMBL;Acc:B8MWG1]
CADAFLAG00001630	AFLA_088520	EQ963472	+	4372092-4373515	4371986-4374348	CUE domain protein, putative [Source:UniProtKB/TrEMBL;Acc:B8MWG2]
CADAFLAG00001631	AFLA_088530	EQ963472	+	4375767–4378382		Transmembrane glycoprotein, putative [Source:UniProtKB/TrEMBL;Acc:B8MWG3]
CADAFLAG00001632	AFLA_088540	EQ963472	+	4379158-4380988	4378904-4381278	Putative uncharacterized protein [Source:UniProtKB/TrEMBL;Acc:B8MWG4]
CADAFLAG00001633	AFLA_088550	EQ963472	-	4381181-4382616	4380892-4382631	Phospholipid methyltransferase [Source:UniProtKB/TrEMBL;Acc:B8MWG5]
CADAFLAG00001634	AFLA_088560	EQ963472	+	4383179-4386898	4382972-4388467	Intermediate filament protein (Mdm1), putative [Source:UniProtKB/TrEMBL;Acc:B8MWG6]
CADAFLAG00001635	AFLA_088570	EQ963472	-	4387436-4388208	4386655-4388483	Putative uncharacterized protein [Source:UniProtKB/TrEMBL;Acc:B8MWG7]
CADAFLAG00001636	AFLA_088580	EQ963472	+	4389127–4389613		Putative uncharacterized protein [Source:UniProtKB/TrEMBL;Acc:B8MWG8]
CADAFLAG00001637	AFLA_088590	EQ963472	+	4390983–4392138		Nuclear pore complex protein (SonA), putative [Source:UniProtKB/TrEMBL;Acc:B8MWG9]
CADAFLAG00001638	AFLA_088600	EQ963472	+	4392943–4393524		Putative uncharacterized protein [Source:UniProtKB/TrEMBL;Acc:B8MWH0]
CADAFLAG00001639	AFLA_088610	EQ963472	+	4394168-4395630	4393860-4396085	Lactonohydrolase, putative [Source:UniProtKB/TrEMBL;Acc:B8MWH1]
CADAFLAG00001640	AFLA_088620	EQ963472	-	4395987-4397174	4395728-4397241	UPF0160 domain protein MYG1, putative [Source:UniProtKB/TrEMBL;Acc:B8MWH2]
CADAFLAG00001641	AFLA_088630	EQ963472	+	4398481–4399895		Putative uncharacterized protein [Source:UniProtKB/TrEMBL;Acc:B8MWH3]
CADAFLAG00001642	AFLA_088640	EQ963472	-	4400211-4400630	4400211-4403662	Putative uncharacterized protein [Source:UniProtKB/TrEMBL;Acc:B8MWH4]
CADAFLAG00001643	AFLA_088650	EQ963472	-	4402130-4402762	4401411-4403110	cAMP-regulated phosphoprotein family protein Igo1, putative [Source:UniProtKB/TrEMBL;Acc:B8MWH5]
CADAFLAG00001644	AFLA_088660	EQ963472	+	4403573-4404740	4402507-4408087	DUF431 domain protein [Source:UniProtKB/TrEMBL;Acc:B8MWH6]
CADAFLAG00001645	AFLA_088670	EQ963472	+	4405702-4407650	4405282-4408087	Pheromone processing carboxypeptidase Kex1 [Source:UniProtKB/TrEMBL;Acc:B8MWR7]
CADAFLAG00001646	AFLA_088680	EQ963472	-	4407989–4409305		Probable cytosolic iron-sulfur protein assembly protein 1 [Source:UniProtKB/Swiss-Prot;Acc:B8MWR8]
CADAFLAG00001647	AFLA_088690	EQ963472	-	4409713–4412676		IQ calmodulin-binding motif domain protein [Source:UniProtKB/TrEMBL;Acc:B8MWR9]
CADAFLAG00001648	AFLA_088700	EQ963472	-	4414182-4416522	4413409-4416609	CHY and RING finger domain protein, putative [Source:UniProtKB/TrEMBL;Acc:B8MWS0]
CADAFLAG00001649	AFLA_088710	EQ963472	+	4418176-4420020	4418137-4421819	Putative uncharacterized protein [Source:UniProtKB/TrEMBL;Acc:B8MWS1]
CADAFLAG00001650	AFLA_088720	EQ963472	-	4421675-4422629	4421675-4422813	Iron/copper transporter Atx1, putative [Source:UniProtKB/TrEMBL;Acc:B8MWS2]
CADAFLAG00001651	AFLA_088730	EQ963472	-	4423036-4426109	4422990-4426279	Putative uncharacterized protein [Source:UniProtKB/TrEMBL;Acc:B8MWS3]
CADAFLAG00001652	AFLA_088740	EQ963472	+	4426700-4427542	4426613-4428027	Putative uncharacterized protein [Source:UniProtKB/TrEMBL;Acc:B8MWS4]
CADAFLAG00001653	AFLA_088750	EQ963472	-	4427753-4429996	4427451-4430082	Meiotic recombination protein Ski8/Rec14, putative [Source:UniProtKB/TrEMBL;Acc:B8MWS5]
CADAFLAG00001654	AFLA_088760	EQ963472	+	4430385-4431686	4430216-4431999	Septin [Source:UniProtKB/TrEMBL;Acc:B8MWS6]
CADAFLAG00001655	AFLA_088770	EQ963472	-	4431901–4433262		Guanylate kinase [Source:UniProtKB/TrEMBL;Acc:B8MWS7]
CADAFLAG00001656	AFLA_088780	EQ963472	-	4433516-4435497	4431592-4437174	Golgi matrix protein, putative [Source:UniProtKB/TrEMBL;Acc:B8MWS8]
CADAFLAG00001657	AFLA_088790	EQ963472	-	4436146-4436770	4435785-4437148	DUF814 domain protein, putative [Source:UniProtKB/TrEMBL;Acc:B8MWS9]
CADAFLAG00001658	AFLA_088800	EQ963472	+	4439996-4440253	4439368-4441014	Putative uncharacterized protein [Source:UniProtKB/TrEMBL;Acc:B8MWT0]
CADAFLAG00001659	AFLA_088810	EQ963472	-	4442484-4444810	4441633-4445366	Glycerol-3-phosphate dehydrogenase, mitochondrial [Source:UniProtKB/TrEMBL;Acc:B8MWT1]
CADAFLAG00001660	AFLA_088820	EQ963472	+	4446996-4448207	4446695-4451387	Cytochrome P450 phenylacetate hydroxylase, putative [Source:UniProtKB/TrEMBL;Acc:B8MWT2]
CADAFLAG00001661	AFLA_088830	EQ963472	+	4455065-4456255	4454266-4457288	Shugoshin, putative [Source:UniProtKB/TrEMBL;Acc:B8MWT3]
CADAFLAG00001662	AFLA_088840	EQ963472	-	4457190–4457808		Ppp1r11-prov protein, putative [Source:UniProtKB/TrEMBL;Acc:B8MWT4]
CADAFLAG00001663	AFLA_088850	EQ963472	-	4458552-4462557	4455914-4462823	Exportin KapK [Source:UniProtKB/TrEMBL;Acc:B8MWT5]
CADAFLAG00001664	AFLA_088860	EQ963472	+	4465293-4467471	4463856-4468316	Acetyltransferase, putative [Source:UniProtKB/TrEMBL;Acc:B8MWT6]
CADAFLAG00001665	AFLA_088870	EQ963472	-	4468043-4468948	4467373-4469204	Delta-aminolevulinic acid dehydratase [Source:UniProtKB/TrEMBL;Acc:B8MWT7]
CADAFLAG00001666	AFLA_022800	EQ963473	-	474–1309		Putative uncharacterized protein [Source:UniProtKB/TrEMBL;Acc:B8N0D6]
CADAFLAG00001667	AFLA_022810	EQ963473	+	4125-5886	3924-5947	Sugar transporter, putative [Source:UniProtKB/TrEMBL;Acc:B8N0D7]
CADAFLAG00001668	AFLA_022820	EQ963473	-	7454-10959	7454-11000	Putative uncharacterized protein [Source:UniProtKB/TrEMBL;Acc:B8N0D8]
CADAFLAG00001669	AFLA_022830	EQ963473	+	11750–13504		Putative uncharacterized protein [Source:UniProtKB/TrEMBL;Acc:B8N0D9]
CADAFLAG00001670	AFLA_022840	EQ963473	-	15005–16614		Allantoate permease, putative [Source:UniProtKB/TrEMBL;Acc:B8N0E0]
CADAFLAG00001671	AFLA_022850	EQ963473	+	16942–17796		Putative uncharacterized protein [Source:UniProtKB/TrEMBL;Acc:B8N0E1]
CADAFLAG00001672	AFLA_022860	EQ963473	-	19673–20098		Putative uncharacterized protein [Source:UniProtKB/TrEMBL;Acc:B8N0E2]
CADAFLAG00001673	AFLA_022870	EQ963473	-	20652-21929	17888-21929	Putative uncharacterized protein [Source:UniProtKB/TrEMBL;Acc:B8N0E3]
CADAFLAG00001674	AFLA_022880	EQ963473	-	22398-25237	22398-25284	Oligopeptide transporter, putative [Source:UniProtKB/TrEMBL;Acc:B8N0E4]
CADAFLAG00001675	AFLA_022990	EQ963473	+	26396-27139	25649-27392	Putative uncharacterized protein [Source:UniProtKB/TrEMBL;Acc:B8N0E5]
CADAFLAG00001676	AFLA_023000	EQ963473	-	30057–31125		Ankyrin domain protein [Source:UniProtKB/TrEMBL;Acc:B8N0E6]
CADAFLAG00001677	AFLA_023010	EQ963473	+	32707-33814	32699-34071	GA4 desaturase family protein [Source:UniProtKB/TrEMBL;Acc:B8N0E7]
CADAFLAG00001678	AFLA_023020	EQ963473	-	34356–37421		NRPS-like enzyme, putative [Source:UniProtKB/TrEMBL;Acc:B8N0E8]
CADAFLAG00001679	AFLA_023030	EQ963473	+	38036–39695		Cytochrome P450 oxidoreductase GliC-like, putative [Source:UniProtKB/TrEMBL;Acc:B8N0E9]
CADAFLAG00001680	AFLA_023040	EQ963473	+	39903–42021		C6 transcription factor, putative [Source:UniProtKB/TrEMBL;Acc:B8N0F0]
CADAFLAG00001681	AFLA_023050	EQ963473	+	42622-44123	40681-44123	MFS transporter, putative [Source:UniProtKB/TrEMBL;Acc:B8N0F1]
CADAFLAG00001682	AFLA_023060	EQ963473	-	44723-45034	44047-45267	Putative uncharacterized protein [Source:UniProtKB/TrEMBL;Acc:B8N0F2]
CADAFLAG00001683	AFLA_023070	EQ963473	+	45811-47880	45742-48121	Integral membrane protein [Source:UniProtKB/TrEMBL;Acc:B8N2M3]
CADAFLAG00001684	AFLA_023080	EQ963473	-	48023-49438	47784-50126	Integral membrane protein TmpA [Source:UniProtKB/TrEMBL;Acc:B8N2M4]
CADAFLAG00001685	AFLA_023090	EQ963473	+	51397-52085	50901-52214	Putative uncharacterized protein [Source:UniProtKB/TrEMBL;Acc:B8N2M5]
CADAFLAG00001686	AFLA_023100	EQ963473	-	52159-53060	50901-53542	Putative uncharacterized protein [Source:UniProtKB/TrEMBL;Acc:B8N2M6]
CADAFLAG00001687	AFLA_023110	EQ963473	+	56623–58008		Putative uncharacterized protein [Source:UniProtKB/TrEMBL;Acc:B8N2M7]
CADAFLAG00001688	AFLA_023120	EQ963473	-	58324–58845		Quercetin 2,3-dioxygenase family protein [Source:UniProtKB/TrEMBL;Acc:B8N2M8]
CADAFLAG00001689	AFLA_023130	EQ963473	-	58894-59481	58324-59481	Putative uncharacterized protein [Source:UniProtKB/TrEMBL;Acc:B8N2M9]
CADAFLAG00001690	AFLA_023140	EQ963473	-	61057–61833		Putative uncharacterized protein [Source:UniProtKB/TrEMBL;Acc:B8N2N0]
CADAFLAG00001691	AFLA_023150	EQ963473	-	61988–62451		Putative uncharacterized protein [Source:UniProtKB/TrEMBL;Acc:B8N2N1]
CADAFLAG00001692	AFLA_023160	EQ963473	-	63896–64503		Ankyrin repeat-rich membrane-spanning protein, putative [Source:UniProtKB/TrEMBL;Acc:B8N2N2]
CADAFLAG00001693	AFLA_023170	EQ963473	-	67940-69918	67810-71194	MFS transporter, putative [Source:UniProtKB/TrEMBL;Acc:B8N2N3]
CADAFLAG00001694	AFLA_023180	EQ963473	+	70984-71446	69912-71446	GNAT family N-acetyltransferase, putative [Source:UniProtKB/TrEMBL;Acc:B8N2N4]
CADAFLAG00001695	AFLA_023190	EQ963473	-	71470-72285	71351-73265	C6 finger domain protein, putative [Source:UniProtKB/TrEMBL;Acc:B8N2N5]
CADAFLAG00001696	AFLA_023200	EQ963473	+	73457–75165		Acetylcholinesterase, putative [Source:UniProtKB/TrEMBL;Acc:B8N2N6]
CADAFLAG00001697	AFLA_023210	EQ963473	-	75403–77007		FAD dependent oxidoreductase, putative [Source:UniProtKB/TrEMBL;Acc:B8N2N7]
CADAFLAG00001698	AFLA_023220	EQ963473	+	77554–78212		Putative uncharacterized protein [Source:UniProtKB/TrEMBL;Acc:B8N2N8]
CADAFLAG00001699	AFLA_023230	EQ963473	+	78371-80333	77512-83182	General amidase GmdB [Source:UniProtKB/TrEMBL;Acc:B8N2N9]
CADAFLAG00001700	AFLA_023240	EQ963473	+	84522–85244		Putative uncharacterized protein [Source:UniProtKB/TrEMBL;Acc:B8N2P0]
CADAFLAG00001701	AFLA_023250	EQ963473	-	86555-87220	85657-87813	Putative uncharacterized protein [Source:UniProtKB/TrEMBL;Acc:B8N2P1]
CADAFLAG00001702	AFLA_023260	EQ963473	+	88440-90522	87124-90817	Pathway-specific regulatory protein [Source:UniProtKB/TrEMBL;Acc:B8N2P2]
CADAFLAG00001703	AFLA_023270	EQ963473	+	91812–93725		MFS multidrug transporter, putative [Source:UniProtKB/TrEMBL;Acc:B8N2P3]
CADAFLAG00001704	AFLA_023280	EQ963473	-	94203–95024		Putative uncharacterized protein [Source:UniProtKB/TrEMBL;Acc:B8N2P4]
CADAFLAG00001705	AFLA_023290	EQ963473	+	98438-100186	98411-100501	Amino acids transporter, putative [Source:UniProtKB/TrEMBL;Acc:B8N2P5]
CADAFLAG00001706	AFLA_023300	EQ963473	-	100427-101011	100088-101011	Putative uncharacterized protein [Source:UniProtKB/TrEMBL;Acc:B8N2P6]
CADAFLAG00001707	AFLA_023310	EQ963473	+	103470-104187	103470-104476	Putative uncharacterized protein [Source:UniProtKB/TrEMBL;Acc:B8N2P7]
CADAFLAG00001708	AFLA_023320	EQ963473	-	105623-106197	105402-106808	Peptidyl-prolyl cis-trans isomerase [Source:UniProtKB/TrEMBL;Acc:B8N2P8]
CADAFLAG00001709	AFLA_023330	EQ963473	+	107183-107875	107145-108539	Putative uncharacterized protein [Source:UniProtKB/TrEMBL;Acc:B8N2P9]
CADAFLAG00001710	AFLA_023340	EQ963473	+	109859-114170	109535-114288	Pectinesterase [Source:UniProtKB/TrEMBL;Acc:B8N2Q0]
CADAFLAG00001711	AFLA_023350	EQ963473	-	115967–118455		Beta-glucosidase, putative [Source:UniProtKB/TrEMBL;Acc:B8N2Q1]
CADAFLAG00001712	AFLA_023360	EQ963473	-	120094–120698		Putative uncharacterized protein [Source:UniProtKB/TrEMBL;Acc:B8N2Q2]
CADAFLAG00001713	AFLA_023370	EQ963473	+	123830–124237		Putative uncharacterized protein [Source:UniProtKB/TrEMBL;Acc:B8N2Q3]
CADAFLAG00001714	AFLA_023380	EQ963473	-	124721-126462	124721-126776	Hexokinase family protein [Source:UniProtKB/TrEMBL;Acc:B8N2Q4]
CADAFLAG00001715	AFLA_023390	EQ963473	-	127888-128844	127635-129311	Cutinase, putative [Source:UniProtKB/TrEMBL;Acc:B8N2Q5]
CADAFLAG00001716	AFLA_023400	EQ963473	-	133767-135771	132808-136058	Pantothenate transporter, putative [Source:UniProtKB/TrEMBL;Acc:B8N2Q6]
CADAFLAG00001717	AFLA_023410	EQ963473	+	136652–137734		Putative uncharacterized protein [Source:UniProtKB/TrEMBL;Acc:B8N2Q7]
CADAFLAG00001718	AFLA_023420	EQ963473	+	138323-140265	136258-140479	Fungal specific transcription factor, putative [Source:UniProtKB/TrEMBL;Acc:B8N2Q8]
CADAFLAG00001719	AFLA_023430	EQ963473	-	140405-142119	140173-142231	Glycosyl transferase, putative [Source:UniProtKB/TrEMBL;Acc:B8N2Q9]
CADAFLAG00001720	AFLA_023440	EQ963473	+	142920–144425		Acyltransferase, putative [Source:UniProtKB/TrEMBL;Acc:B8N2R0]
CADAFLAG00001721	AFLA_023450	EQ963473	+	145132-146554	144994-146840	Putative uncharacterized protein [Source:UniProtKB/TrEMBL;Acc:B8N2R1]
CADAFLAG00001722	AFLA_023460	EQ963473	-	149496-157083	149339-157788	Alpha-1,3-glucan synthase Ags1 [Source:UniProtKB/TrEMBL;Acc:B8N2R2]
CADAFLAG00001723	AFLA_023470	EQ963473	+	157906–158758		Putative uncharacterized protein [Source:UniProtKB/TrEMBL;Acc:B8N2R3]
CADAFLAG00001724	AFLA_023480	EQ963473	+	161121-162831	159231-163063	Alpha-amylase, putative [Source:UniProtKB/TrEMBL;Acc:B8N2R4]
CADAFLAG00001725	AFLA_023490	EQ963473	+	163686-165749	163369-165979	Alpha-amylase, putative [Source:UniProtKB/TrEMBL;Acc:B8N2R5]
CADAFLAG00001726	AFLA_023500	EQ963473	-	167011-168442	166992-168911	Extracellular conserved serine-rich protein [Source:UniProtKB/TrEMBL;Acc:B8N2R6]
CADAFLAG00001727	AFLA_023510	EQ963473	+	169676–170518		UDP-galactose 4-epimerase, putative [Source:UniProtKB/TrEMBL;Acc:B8N2R7]
CADAFLAG00001728	AFLA_023520	EQ963473	+	171057-172256	169227-172445	Adenosine deaminase, putative [Source:UniProtKB/TrEMBL;Acc:B8N2R8]
CADAFLAG00001729	AFLA_023530	EQ963473	+	173375-174397	173062-174455	Alcohol dehydrogenase, putative [Source:UniProtKB/TrEMBL;Acc:B8N2R9]
CADAFLAG00001730	AFLA_023540	EQ963473	-	174869–179285		ABC multidrug transporter, putative [Source:UniProtKB/TrEMBL;Acc:B8N2S0]
CADAFLAG00001731	AFLA_023550	EQ963473	+	181418–183454		MFS multidrug transporter, putative [Source:UniProtKB/TrEMBL;Acc:B8N2S1]
CADAFLAG00001732	AFLA_023560	EQ963473	-	184312–187490		Periplasmic nitrate reductase, putative [Source:UniProtKB/TrEMBL;Acc:B8N2S2]
CADAFLAG00001733	AFLA_023570	EQ963473	+	187739-189091	187721-189239	Molybdenum cofactor biosynthesis protein (MoeA), putative [Source:UniProtKB/TrEMBL;Acc:B8N2S3]
CADAFLAG00001734	AFLA_023580	EQ963473	-	189141-189605	189045-189937	Putative uncharacterized protein [Source:UniProtKB/TrEMBL;Acc:B8N2S4]
CADAFLAG00001735	AFLA_023590	EQ963473	-	191249-192685	190773-192972	F-box domain protein [Source:UniProtKB/TrEMBL;Acc:B8N2S5]
CADAFLAG00001736	AFLA_023600	EQ963473	+	197427-198062	197094-198147	Cell wall protein PhiA [Source:UniProtKB/TrEMBL;Acc:B8N2S6]
CADAFLAG00001737	AFLA_023610	EQ963473	+	199571–199957		Putative uncharacterized protein [Source:UniProtKB/TrEMBL;Acc:B8N2S7]
CADAFLAG00001738	AFLA_023620	EQ963473	+	205560-208272	205560-208562	Sexual differentiation process protein isp4, putative [Source:UniProtKB/TrEMBL;Acc:B8N2S8]
CADAFLAG00001739	AFLA_023630	EQ963473	-	209496–209762		Putative uncharacterized protein [Source:UniProtKB/TrEMBL;Acc:B8N2S9]
CADAFLAG00001740	AFLA_023640	EQ963473	+	211433-213126	210962-213126	Putative uncharacterized protein [Source:UniProtKB/TrEMBL;Acc:B8N2T0]
CADAFLAG00001741	AFLA_023650	EQ963473	-	213326–214148		Endo-1,3-1,4-beta-D-glucanase, putative [Source:UniProtKB/TrEMBL;Acc:B8N2T1]
CADAFLAG00001742	AFLA_023660	EQ963473	-	214994–216283		Putative uncharacterized protein [Source:UniProtKB/TrEMBL;Acc:B8N2T2]
CADAFLAG00001743	AFLA_023670	EQ963473	+	217249–218465		Monooxygenase, putative [Source:UniProtKB/TrEMBL;Acc:B8N2T3]
CADAFLAG00001744	AFLA_023680	EQ963473	-	218891–219774		Putative uncharacterized protein [Source:UniProtKB/TrEMBL;Acc:B8N2T4]
CADAFLAG00001745	AFLA_023690	EQ963473	-	220320–220973		Putative uncharacterized protein [Source:UniProtKB/TrEMBL;Acc:B8N2T5]
CADAFLAG00001746	AFLA_023700	EQ963473	-	221401–222313		Flavohemoprotein B5/b5r, putative [Source:UniProtKB/TrEMBL;Acc:B8N2T6]
CADAFLAG00001747	AFLA_023710	EQ963473	-	222334-224167	221401-224376	Cytochrome B5, putative [Source:UniProtKB/TrEMBL;Acc:B8N2T7]
CADAFLAG00001748	AFLA_023720	EQ963473	+	225725-225982	225409-226103	Phosphocarrier protein HPr, putative [Source:UniProtKB/TrEMBL;Acc:B8N2T8]
CADAFLAG00001749	AFLA_023730	EQ963473	-	226561-227855	226530-227960	2-hydroxyacid dehydrogenase, putative [Source:UniProtKB/TrEMBL;Acc:B8N2T9]
CADAFLAG00001750	AFLA_023740	EQ963473	+	235357–236547		Glutathione S-transferase, putative [Source:UniProtKB/TrEMBL;Acc:B8N2U0]
CADAFLAG00001751	AFLA_023750	EQ963473	+	237252–237899		Putative uncharacterized protein [Source:UniProtKB/TrEMBL;Acc:B8N2U1]
CADAFLAG00001752	AFLA_023760	EQ963473	-	238354–240588		Putative uncharacterized protein [Source:UniProtKB/TrEMBL;Acc:B8N2U2]
CADAFLAG00001753	AFLA_023770	EQ963473	-	241336-243416	241129-243479	Putative uncharacterized protein [Source:UniProtKB/TrEMBL;Acc:B8N2U3]
CADAFLAG00001754	AFLA_023780	EQ963473	+	243817–244887		Alcohol dehydrogenase, putative [Source:UniProtKB/TrEMBL;Acc:B8N2U4]
CADAFLAG00001755	AFLA_023790	EQ963473	-	245581–246309		Putative uncharacterized protein [Source:UniProtKB/TrEMBL;Acc:B8N2U5]
CADAFLAG00001756	AFLA_023800	EQ963473	-	247848–248633		Putative uncharacterized protein [Source:UniProtKB/TrEMBL;Acc:B8N2U6]
CADAFLAG00001757	AFLA_023810	EQ963473	-	250053–251034		Putative uncharacterized protein [Source:UniProtKB/TrEMBL;Acc:B8N2U7]
CADAFLAG00001758	AFLA_023820	EQ963473	-	251718–253766		Putative uncharacterized protein [Source:UniProtKB/TrEMBL;Acc:B8N2U8]
CADAFLAG00001759	AFLA_023830	EQ963473	+	254877–255572		Putative uncharacterized protein [Source:UniProtKB/TrEMBL;Acc:B8N2U9]
CADAFLAG00001760	AFLA_023840	EQ963473	+	256910-257878	256635-257878	Putative uncharacterized protein [Source:UniProtKB/TrEMBL;Acc:B8N2V0]
CADAFLAG00001761	AFLA_023850	EQ963473	-	258313-259109	258174-259295	Putative uncharacterized protein [Source:UniProtKB/TrEMBL;Acc:B8N2V1]
CADAFLAG00001762	AFLA_023860	EQ963473	-	259862–261951		DNA-binding protein rfxank, putative [Source:UniProtKB/TrEMBL;Acc:B8N2V2]
CADAFLAG00001763	AFLA_023870	EQ963473	-	262110-263539	259862-264787	Putative uncharacterized protein [Source:UniProtKB/TrEMBL;Acc:B8N2V3]
CADAFLAG00001764	AFLA_023880	EQ963473	-	266844-269154	266738-269201	Putative uncharacterized protein [Source:UniProtKB/TrEMBL;Acc:B8N2V4]
CADAFLAG00001765	AFLA_023890	EQ963473	+	269781–271065		Putative uncharacterized protein [Source:UniProtKB/TrEMBL;Acc:B8N2V5]
CADAFLAG00001766	AFLA_023900	EQ963473	+	272088-272572	271803-272574	Putative uncharacterized protein [Source:UniProtKB/TrEMBL;Acc:B8N2V6]
CADAFLAG00001767	AFLA_023910	EQ963473	-	273376–273921		Putative uncharacterized protein [Source:UniProtKB/TrEMBL;Acc:B8N2V7]
CADAFLAG00001768	AFLA_023920	EQ963473	-	275924–276228		Putative uncharacterized protein [Source:UniProtKB/TrEMBL;Acc:B8N2V8]
CADAFLAG00001769	AFLA_023930	EQ963473	+	276459–277201		Putative uncharacterized protein [Source:UniProtKB/TrEMBL;Acc:B8N2V9]
CADAFLAG00001770	AFLA_023940	EQ963473	+	278664–279442		Putative uncharacterized protein [Source:UniProtKB/TrEMBL;Acc:B8N2W0]
CADAFLAG00001771	AFLA_023950	EQ963473	-	282021–282824		Putative uncharacterized protein [Source:UniProtKB/TrEMBL;Acc:B8N2W1]
CADAFLAG00001772	AFLA_023960	EQ963473	+	284273–285202		Dihydrodipicolinate synthetase family protein [Source:UniProtKB/TrEMBL;Acc:B8N0F3]
CADAFLAG00001773	AFLA_023970	EQ963473	+	286190-288961	286190-288721	C6 transcription factor, putative [Source:UniProtKB/TrEMBL;Acc:B8N0F4]
CADAFLAG00001774	AFLA_023980	EQ963473	+	289337-290975	286190-291018	MFS transporter, putative [Source:UniProtKB/TrEMBL;Acc:B8N0F5]
CADAFLAG00001775	AFLA_023990	EQ963473	+	292019–292351		Putative uncharacterized protein [Source:UniProtKB/TrEMBL;Acc:B8N0F6]
CADAFLAG00001776	AFLA_024000	EQ963473	-	292771-294257	292771-294305	FAD dependent oxidoreductase superfamily [Source:UniProtKB/TrEMBL;Acc:B8N0F7]
CADAFLAG00001777	AFLA_024010	EQ963473	+	294815–295291		Amino-acid permease, putative [Source:UniProtKB/TrEMBL;Acc:B8N0F8]
CADAFLAG00001778	AFLA_024020	EQ963473	+	295333-296475	294815-296475	Amino acid permease, putative [Source:UniProtKB/TrEMBL;Acc:B8N0F9]
CADAFLAG00001779	AFLA_024030	EQ963473	+	297141-297863	296875-298042	2-haloalkanoic acid dehalogenase, putative [Source:UniProtKB/TrEMBL;Acc:B8N0G0]
CADAFLAG00001780	AFLA_024040	EQ963473	-	297990-300701	297990-301673	Fungal specific transcription factor, putative [Source:UniProtKB/TrEMBL;Acc:B8N0G1]
CADAFLAG00001781	AFLA_024050	EQ963473	+	303644-305005	303365-305378	Secretory lipase, putative [Source:UniProtKB/TrEMBL;Acc:B8N0G2]
CADAFLAG00001782	AFLA_024060	EQ963473	-	305283–306717		Nonspecific lipid-transfer protein, putative [Source:UniProtKB/TrEMBL;Acc:B8N0G3]
CADAFLAG00001783	AFLA_024070	EQ963473	-	307232-309071	307051-309427	Cytochrome P450, putative [Source:UniProtKB/TrEMBL;Acc:B8N0G4]
CADAFLAG00001784	AFLA_024080	EQ963473	-	309641-311439	309623-311827	Cytochrome p450, putative [Source:UniProtKB/TrEMBL;Acc:B8N0G5]
CADAFLAG00001785	AFLA_024090	EQ963473	+	312507-314539	312419-314628	Efflux pump antibiotic resistance protein, putative [Source:UniProtKB/TrEMBL;Acc:B8N0G6]
CADAFLAG00001786	AFLA_024100	EQ963473	+	315449-316716	315052-317393	Putative uncharacterized protein [Source:UniProtKB/TrEMBL;Acc:B8N0G7]
CADAFLAG00001787	AFLA_024110	EQ963473	+	317855–319029		Set and mynd domain containing protein, putative [Source:UniProtKB/TrEMBL;Acc:B8N0G8]
CADAFLAG00001788	AFLA_024120	EQ963473	-	319250–320020		Putative uncharacterized protein [Source:UniProtKB/TrEMBL;Acc:B8N0G9]
CADAFLAG00001789	AFLA_024130	EQ963473	+	321577–322192		Putative uncharacterized protein [Source:UniProtKB/TrEMBL;Acc:B8N0H0]
CADAFLAG00001790	AFLA_024140	EQ963473	-	322446–324308		Xenobiotic compound monooxygenase, DszA family, putative [Source:UniProtKB/TrEMBL;Acc:B8N0H1]
CADAFLAG00001791	AFLA_024150	EQ963473	+	325455–328112		Urea active transporter, putative [Source:UniProtKB/TrEMBL;Acc:B8N0H2]
CADAFLAG00001792	AFLA_024160	EQ963473	-	328396–333069		Kinesin light chain, putative [Source:UniProtKB/TrEMBL;Acc:B8N0H3]
CADAFLAG00001793	AFLA_024170	EQ963473	-	333860–335976		Glucose-methanol-choline (Gmc) oxidoreductase, putative [Source:UniProtKB/TrEMBL;Acc:B8N0H4]
CADAFLAG00001794	AFLA_024180	EQ963473	+	338941–339987		Putative uncharacterized protein [Source:UniProtKB/TrEMBL;Acc:B8N0H5]
CADAFLAG00001795	AFLA_024190	EQ963473	+	340983-342944	338547-342988	Putative uncharacterized protein [Source:UniProtKB/TrEMBL;Acc:B8N0H6]
CADAFLAG00001796	AFLA_024200	EQ963473	+	343774–345344		Polyamine transporter, putative [Source:UniProtKB/TrEMBL;Acc:B8N0H7]
CADAFLAG00001797	AFLA_024210	EQ963473	-	347168–348719		Cytochrome P450, putative [Source:UniProtKB/TrEMBL;Acc:B8N0H8]
CADAFLAG00001798	AFLA_024220	EQ963473	-	348827–349469		Putative uncharacterized protein [Source:UniProtKB/TrEMBL;Acc:B8N0H9]
CADAFLAG00001799	AFLA_024230	EQ963473	+	351717-353145	350843-353145	Putative uncharacterized protein [Source:UniProtKB/TrEMBL;Acc:B8N0I0]
CADAFLAG00001800	AFLA_024240	EQ963473	-	353540-355012	353372-355140	Putative uncharacterized protein [Source:UniProtKB/TrEMBL;Acc:B8N0I1]
CADAFLAG00001801	AFLA_024250	EQ963473	+	358173-359911	358111-360298	General amidase, putative [Source:UniProtKB/TrEMBL;Acc:B8N0I2]
CADAFLAG00001802	AFLA_024260	EQ963473	-	360203-362693	359719-363176	Glycosyl hydrolase, putative [Source:UniProtKB/TrEMBL;Acc:B8N0I3]
CADAFLAG00001803	AFLA_024270	EQ963473	+	363889-365781	363307-365781	Aryl-alcohol dehydrogenase, putative [Source:UniProtKB/TrEMBL;Acc:B8N0I4]
CADAFLAG00001804	AFLA_024280	EQ963473	+	365978-367698	365978-369839	Cell wall glycosyl hydrolase Dfg5, putative [Source:UniProtKB/TrEMBL;Acc:B8N0I5]
CADAFLAG00001805	AFLA_024290	EQ963473	+	368150–369370		Alcohol dehydrogenase, putative [Source:UniProtKB/TrEMBL;Acc:B8N0I6]
CADAFLAG00001806	AFLA_024300	EQ963473	-	369744–371675		Amidase, putative [Source:UniProtKB/TrEMBL;Acc:B8N0I7]
CADAFLAG00001807	AFLA_024310	EQ963473	-	371894–372082		Putative uncharacterized protein [Source:UniProtKB/TrEMBL;Acc:B8N0I8]
CADAFLAG00001808	AFLA_024320	EQ963473	-	372461–372877		Putative uncharacterized protein [Source:UniProtKB/TrEMBL;Acc:B8N0I9]
CADAFLAG00001809	AFLA_024330	EQ963473	+	374804–376801		Phosphate transporter, putative [Source:UniProtKB/TrEMBL;Acc:B8N0J0]
CADAFLAG00001810	AFLA_024340	EQ963473	-	377085–377836		Putative uncharacterized protein [Source:UniProtKB/TrEMBL;Acc:B8N0J1]
CADAFLAG00001811	AFLA_024350	EQ963473	-	378309–379151		Daf-9 isoform A, putative [Source:UniProtKB/TrEMBL;Acc:B8N0J2]
CADAFLAG00001812	AFLA_024360	EQ963473	-	380161–381445		CorA family metal ion transporter, putative [Source:UniProtKB/TrEMBL;Acc:B8N0J3]
CADAFLAG00001813	AFLA_024370	EQ963473	+	382118–383538		MFS pantothenate transporter, putative [Source:UniProtKB/TrEMBL;Acc:B8N0J4]
CADAFLAG00001814	AFLA_024380	EQ963473	-	383640-385636	383640-385659	Fatty-acid amide hydrolase, putative [Source:UniProtKB/TrEMBL;Acc:B8N0J5]
CADAFLAG00001815	AFLA_024390	EQ963473	-	385872–387356		Pantothenate transporter, putative [Source:UniProtKB/TrEMBL;Acc:B8N0J6]
CADAFLAG00001816	AFLA_024400	EQ963473	+	387700–388475		Putative uncharacterized protein [Source:UniProtKB/TrEMBL;Acc:B8N0J7]
CADAFLAG00001817	AFLA_024410	EQ963473	+	388956–389340		Putative uncharacterized protein [Source:UniProtKB/TrEMBL;Acc:B8N0J8]
CADAFLAG00001818	AFLA_024420	EQ963473	+	389729–390761		Putative uncharacterized protein [Source:UniProtKB/TrEMBL;Acc:B8N0J9]
CADAFLAG00001819	AFLA_024430	EQ963473	+	392350–392621		Putative uncharacterized protein [Source:UniProtKB/TrEMBL;Acc:B8N0K0]
CADAFLAG00001820	AFLA_024440	EQ963473	+	392716–393285		Putative uncharacterized protein [Source:UniProtKB/TrEMBL;Acc:B8N0K1]
CADAFLAG00001821	AFLA_024450	EQ963473	-	393869–395071		Putative uncharacterized protein [Source:UniProtKB/TrEMBL;Acc:B8N0K2]
CADAFLAG00001822	AFLA_024460	EQ963473	+	395770-397258	395577-397258	Putative uncharacterized protein [Source:UniProtKB/TrEMBL;Acc:B8N0K3]
CADAFLAG00001823	AFLA_024470	EQ963473	-	397466–399475		RNA polymerase II mediator complex component SRB4, putative [Source:UniProtKB/TrEMBL;Acc:B8N0K4]
CADAFLAG00001824	AFLA_024480	EQ963473	+	400966-403437	400689-403953	6-phosphofructokinase [Source:UniProtKB/TrEMBL;Acc:B8N0K5]
CADAFLAG00001825	AFLA_024490	EQ963473	-	403880-405418	403368-405418	IMP-specific 5'-nucleotidase 1 [Source:UniProtKB/TrEMBL;Acc:B8N0K6]
CADAFLAG00001826	AFLA_024500	EQ963473	+	407418–408053		Putative uncharacterized protein [Source:UniProtKB/TrEMBL;Acc:B8N0K7]
CADAFLAG00001827	AFLA_024510	EQ963473	-	408265-410101	408265-410254	MFS quinate transporter, putative [Source:UniProtKB/TrEMBL;Acc:B8N0K8]
CADAFLAG00001828	AFLA_024520	EQ963473	-	412112–413737		MFS transporter, putative [Source:UniProtKB/TrEMBL;Acc:B8N0K9]
CADAFLAG00001829	AFLA_024530	EQ963473	-	415548–420328		ABC multidrug transporter, putative [Source:UniProtKB/TrEMBL;Acc:B8N0L0]
CADAFLAG00001830	AFLA_024540	EQ963473	+	426405–428162		Sensory transduction histidine kinase, putative [Source:UniProtKB/TrEMBL;Acc:B8N0L1]
CADAFLAG00001831	AFLA_024550	EQ963473	-	428816–429786		Putative uncharacterized protein [Source:UniProtKB/TrEMBL;Acc:B8N0L2]
CADAFLAG00001832	AFLA_024560	EQ963473	-	430713–432366		Efflux pump antibiotic resistance protein, putative [Source:UniProtKB/TrEMBL;Acc:B8N0L3]
CADAFLAG00001833	AFLA_024570	EQ963473	+	433819–434669		Putative uncharacterized protein [Source:UniProtKB/TrEMBL;Acc:B8N0L4]
CADAFLAG00001834	AFLA_024580	EQ963473	-	434854-437166	434623-437215	C6 transcription factor, putative [Source:UniProtKB/TrEMBL;Acc:B8N0L5]
CADAFLAG00001835	AFLA_024590	EQ963473	-	437667-439659	437384-439862	Plasma membrane zinc ion transporter, putative [Source:UniProtKB/TrEMBL;Acc:B8N0L6]
CADAFLAG00001836	AFLA_024600	EQ963473	+	441193-442152	440794-442187	Short chain oxidoreductase (CsgA), putative [Source:UniProtKB/TrEMBL;Acc:B8N0L7]
CADAFLAG00001837	AFLA_024610	EQ963473	+	442561–443559		NADP-dependent alcohol dehydrogenase [Source:UniProtKB/TrEMBL;Acc:B8N0L8]
CADAFLAG00001838	AFLA_024620	EQ963473	-	444198-445366	444050-445880	Putative uncharacterized protein [Source:UniProtKB/TrEMBL;Acc:B8N0L9]
CADAFLAG00001839	AFLA_024630	EQ963473	+	446087-447406	445277-447594	Putative uncharacterized protein [Source:UniProtKB/TrEMBL;Acc:B8N0M0]
CADAFLAG00001840	AFLA_024640	EQ963473	-	447496–448554		Putative uncharacterized protein [Source:UniProtKB/TrEMBL;Acc:B8N0M1]
CADAFLAG00001841	AFLA_024650	EQ963473	+	448920–449924		Short-chain dehydrogenase/reductase, putative [Source:UniProtKB/TrEMBL;Acc:B8N0M2]
CADAFLAG00001842	AFLA_024660	EQ963473	+	450749–451277		Putative uncharacterized protein [Source:UniProtKB/TrEMBL;Acc:B8N0M3]
CADAFLAG00001843	AFLA_024670	EQ963473	-	451813–452282		Putative uncharacterized protein [Source:UniProtKB/TrEMBL;Acc:B8N0M4]
CADAFLAG00001844	AFLA_024680	EQ963473	-	452736–453696		Putative uncharacterized protein [Source:UniProtKB/TrEMBL;Acc:B8N0M5]
CADAFLAG00001845	AFLA_024690	EQ963473	-	456826-458128	456806-458166	2-nitropropane dioxygenase, putative [Source:UniProtKB/TrEMBL;Acc:B8N0M6]
CADAFLAG00001846	AFLA_024700	EQ963473	+	458612–459414		Short-chain alcohol dehydrogenase, putative [Source:UniProtKB/TrEMBL;Acc:B8N0M7]
CADAFLAG00001847	AFLA_024710	EQ963473	-	459751–460119		Glycine-rich RNA-binding protein, putative [Source:UniProtKB/TrEMBL;Acc:B8N0M8]
CADAFLAG00001848	AFLA_024720	EQ963473	-	460264-462150	459316-462150	MFS transporter, putative [Source:UniProtKB/TrEMBL;Acc:B8N0M9]
CADAFLAG00001849	AFLA_024730	EQ963473	+	462775–463665		DUF1445 domain protein [Source:UniProtKB/TrEMBL;Acc:B8N0N0]
CADAFLAG00001850	AFLA_024740	EQ963473	-	466233-468315	466105-468559	C6 transcription factor, putative [Source:UniProtKB/TrEMBL;Acc:B8N0N1]
CADAFLAG00001851	AFLA_024750	EQ963473	-	468876–470606		Cytochrome P450 phenylacetate 2-hydroxylase, putative [Source:UniProtKB/TrEMBL;Acc:B8N0N2]
CADAFLAG00001852	AFLA_024760	EQ963473	-	472189-474194	471704-474671	Putative uncharacterized protein [Source:UniProtKB/TrEMBL;Acc:B8N0N3]
CADAFLAG00001853	AFLA_024770	EQ963473	+	476242-477632	476242-477757	Symbiotic chitinase, putative [Source:UniProtKB/TrEMBL;Acc:B8N0N4]
CADAFLAG00001854	AFLA_024780	EQ963473	+	478247-480087	478156-480326	Putative uncharacterized protein [Source:UniProtKB/TrEMBL;Acc:B8N0N5]
CADAFLAG00001855	AFLA_024790	EQ963473	+	480625-482233	480625-482574	Putative uncharacterized protein [Source:UniProtKB/TrEMBL;Acc:B8N0N6]
CADAFLAG00001856	AFLA_024800	EQ963473	+	483505–484235		Putative uncharacterized protein [Source:UniProtKB/TrEMBL;Acc:B8N0N7]
CADAFLAG00001857	AFLA_024810	EQ963473	-	484672-486345	484148-486468	MFS multidrug transporter, putative [Source:UniProtKB/TrEMBL;Acc:B8N0N8]
CADAFLAG00001858	AFLA_024820	EQ963473	-	488860-489624	487154-489624	Putative uncharacterized protein [Source:UniProtKB/TrEMBL;Acc:B8N0N9]
CADAFLAG00001859	AFLA_024830	EQ963473	-	491941–493962		Putative uncharacterized protein [Source:UniProtKB/TrEMBL;Acc:B8N0P0]
CADAFLAG00001860	AFLA_024840	EQ963473	-	494165-498157	491693-499058	MYB DNA-binding domain protein [Source:UniProtKB/TrEMBL;Acc:B8N0P1]
CADAFLAG00001861	AFLA_024850	EQ963473	+	499651-500863	499371-501759	Deoxyhypusine synthase, putative [Source:UniProtKB/TrEMBL;Acc:B8N0P2]
CADAFLAG00001862	AFLA_024860	EQ963473	+	502592-506576	501841-507237	MATH and UCH domain protein, putative [Source:UniProtKB/TrEMBL;Acc:B8N2W2]
CADAFLAG00001863	AFLA_024870	EQ963473	-	507140-509395	506478-509556	Nucleolar RNA methyltransferase (Nop2), putative [Source:UniProtKB/TrEMBL;Acc:B8N2W3]
CADAFLAG00001864	AFLA_024880	EQ963473	+	509719-510491	509590-511385	Putative uncharacterized protein [Source:UniProtKB/TrEMBL;Acc:B8N2W4]
CADAFLAG00001865	AFLA_024890	EQ963473	-	511288-513985	510396-516021	Cell differentiation and development protein Fsr1/Pro11 [Source:UniProtKB/TrEMBL;Acc:B8N2W5]
CADAFLAG00001866	AFLA_024900	EQ963473	-	514785–516010		DNA repair protein Rad14, putative [Source:UniProtKB/TrEMBL;Acc:B8N2W6]
CADAFLAG00001867	AFLA_024910	EQ963473	-	516669–517867		Putative uncharacterized protein [Source:UniProtKB/TrEMBL;Acc:B8N2W7]
CADAFLAG00001868	AFLA_024920	EQ963473	+	520173–523277		DUF221 domain protein, putative [Source:UniProtKB/TrEMBL;Acc:B8N2W8]
CADAFLAG00001869	AFLA_024930	EQ963473	-	523719-528831	523314-530093	Extracellular endoglucanase, putative [Source:UniProtKB/TrEMBL;Acc:B8N2W9]
CADAFLAG00001870	AFLA_024940	EQ963473	+	533581-535403	533435-536234	Eukaryotic translation initiation factor 3, gamma subunit, putative [Source:UniProtKB/TrEMBL;Acc:B8N2X0]
CADAFLAG00001871	AFLA_024950	EQ963473	-	535706-536644	535305-536761	ARP2/3 complex subunit Arc18, putative [Source:UniProtKB/TrEMBL;Acc:B8N2X1]
CADAFLAG00001872	AFLA_024960	EQ963473	+	537751-538486	536790-538638	DNA replication factor C subunit Rfc3, putative [Source:UniProtKB/TrEMBL;Acc:B8N2X2]
CADAFLAG00001873	AFLA_024970	EQ963473	+	539623-541050	539128-541499	Putative uncharacterized protein [Source:UniProtKB/TrEMBL;Acc:B8N2X3]
CADAFLAG00001874	AFLA_024980	EQ963473	-	541411–543442		Putative uncharacterized protein [Source:UniProtKB/TrEMBL;Acc:B8N2X4]
CADAFLAG00001875	AFLA_024990	EQ963473	+	546767-547606	546667-548303	Putative uncharacterized protein [Source:UniProtKB/TrEMBL;Acc:B8N2X5]
CADAFLAG00001876	AFLA_025000	EQ963473	+	549070–549771		Flavoprotein, putative [Source:UniProtKB/TrEMBL;Acc:B8N2X6]
CADAFLAG00001877	AFLA_025010	EQ963473	+	550166-551244	548883-551396	Putative uncharacterized protein [Source:UniProtKB/TrEMBL;Acc:B8N2X7]
CADAFLAG00001878	AFLA_025020	EQ963473	+	551815-553452	551514-554426	Peptidyl-prolyl cis-trans isomerase, putative [Source:UniProtKB/TrEMBL;Acc:B8N2X8]
CADAFLAG00001879	AFLA_025030	EQ963473	-	554328-556753	553357-557589	Heat shock transcription factor Hsf1, putative [Source:UniProtKB/TrEMBL;Acc:B8N2X9]
CADAFLAG00001880	AFLA_025040	EQ963473	-	557961–558973		Aldo-keto reductase (AKR), putative [Source:UniProtKB/TrEMBL;Acc:B8N2Y0]
CADAFLAG00001881	AFLA_025050	EQ963473	+	559809–560195		Putative uncharacterized protein [Source:UniProtKB/TrEMBL;Acc:B8N2Y1]
CADAFLAG00001882	AFLA_025060	EQ963473	+	560678-561350	558875-562296	GPI anchored protein, putative [Source:UniProtKB/TrEMBL;Acc:B8N2Y2]
CADAFLAG00001883	AFLA_025070	EQ963473	+	568296-570256	566219-570406	R3H domain protein, putative [Source:UniProtKB/TrEMBL;Acc:B8N2Y3]
CADAFLAG00001884	AFLA_025080	EQ963473	-	572162-572970	570158-573570	Histone H2A [Source:UniProtKB/TrEMBL;Acc:B8N2Y4]
CADAFLAG00001885	AFLA_025090	EQ963473	+	573771–574820		Phosphate transporter (Pho88), putative [Source:UniProtKB/TrEMBL;Acc:B8N2Y5]
CADAFLAG00001886	AFLA_025100	EQ963473	+	576613–578401		Glyceraldehyde-3-phosphate dehydrogenase [Source:UniProtKB/TrEMBL;Acc:B8N2Y6]
CADAFLAG00001887	AFLA_025110	EQ963473	+	579367–580017		Putative uncharacterized protein [Source:UniProtKB/TrEMBL;Acc:B8N2Y7]
CADAFLAG00001888	AFLA_025120	EQ963473	+	580320-582465	578853-585337	Histone deacetylase, putative [Source:UniProtKB/TrEMBL;Acc:B8N2Y8]
CADAFLAG00001889	AFLA_025130	EQ963473	+	583939–584403		BYS1 domain protein, putative [Source:UniProtKB/TrEMBL;Acc:B8N2Y9]
CADAFLAG00001890	AFLA_025140	EQ963473	-	585240-586058	584305-586289	Dephospho-CoA kinase, putative [Source:UniProtKB/TrEMBL;Acc:B8N2Z0]
CADAFLAG00001891	AFLA_025150	EQ963473	-	587086-588175	586400-588523	Putative uncharacterized protein [Source:UniProtKB/TrEMBL;Acc:B8N2Z1]
CADAFLAG00001892	AFLA_025160	EQ963473	-	589229–590416		Proline racemase, putative [Source:UniProtKB/TrEMBL;Acc:B8N2Z2]
CADAFLAG00001893	AFLA_025170	EQ963473	+	591600-595244	590783-595244	A-pheromone processing metallopeptidase Ste23 [Source:UniProtKB/TrEMBL;Acc:B8N2Z3]
CADAFLAG00001894	AFLA_025180	EQ963473	+	595812–596866		Cleavage and polyadenylation specific factor 5 [Source:UniProtKB/TrEMBL;Acc:B8N2Z4]
CADAFLAG00001895	AFLA_025190	EQ963473	+	598139–599379		Extracellular lipase, putative [Source:UniProtKB/TrEMBL;Acc:B8N2Z5]
CADAFLAG00001896	AFLA_025200	EQ963473	-	601575–602376		Putative uncharacterized protein [Source:UniProtKB/TrEMBL;Acc:B8N2Z6]
CADAFLAG00001897	AFLA_025210	EQ963473	+	602681–603508		NADH-ubiquinone oxidoreductase [Source:UniProtKB/TrEMBL;Acc:B8N2Z7]
CADAFLAG00001898	AFLA_025220	EQ963473	-	603914–604438		UPF0047 domain protein [Source:UniProtKB/TrEMBL;Acc:B8N2Z8]
CADAFLAG00001899	AFLA_025230	EQ963473	-	604847–605901		Putative uncharacterized protein [Source:UniProtKB/TrEMBL;Acc:B8N2Z9]
CADAFLAG00001900	AFLA_025240	EQ963473	-	606806–609340		Ankyrin repeat-containing protein, putative [Source:UniProtKB/TrEMBL;Acc:B8N300]
CADAFLAG00001901	AFLA_025250	EQ963473	+	610444-611200	610360-611234	Putative uncharacterized protein [Source:UniProtKB/TrEMBL;Acc:B8N301]
CADAFLAG00001902	AFLA_025260	EQ963473	+	611679–612224		Putative uncharacterized protein [Source:UniProtKB/TrEMBL;Acc:B8N302]
CADAFLAG00001903	AFLA_025270	EQ963473	-	612849-614639	612759-614801	Putative uncharacterized protein [Source:UniProtKB/TrEMBL;Acc:B8N303]
CADAFLAG00001904	AFLA_025280	EQ963473	+	616889-617527	616865-617527	Putative uncharacterized protein [Source:UniProtKB/TrEMBL;Acc:B8N304]
CADAFLAG00001905	AFLA_025290	EQ963473	+	618535-620246	617946-620720	F-box domain protein [Source:UniProtKB/TrEMBL;Acc:B8N305]
CADAFLAG00001906	AFLA_025300	EQ963473	-	620777-622402	620777-624268	Probable alpha-galactosidase B [Source:UniProtKB/Swiss-Prot;Acc:B8N306]
CADAFLAG00001907	AFLA_025310	EQ963473	-	623572–624268		Putative uncharacterized protein [Source:UniProtKB/TrEMBL;Acc:B8N307]
CADAFLAG00001908	AFLA_025320	EQ963473	+	627523–628559		Putative uncharacterized protein [Source:UniProtKB/TrEMBL;Acc:B8N308]
CADAFLAG00001909	AFLA_025330	EQ963473	-	631015-631378	630891-631659	Putative uncharacterized protein [Source:UniProtKB/TrEMBL;Acc:B8N309]
CADAFLAG00001910	AFLA_025340	EQ963473	-	634568–636333		Dimethylaniline monooxygenase, putative [Source:UniProtKB/TrEMBL;Acc:B8N310]
CADAFLAG00001911	AFLA_025350	EQ963473	+	639028-639354	636705-639592	Putative uncharacterized protein [Source:UniProtKB/TrEMBL;Acc:B8N311]
CADAFLAG00001912	AFLA_025360	EQ963473	-	639505–640881		Epoxide hydrolase, putative [Source:UniProtKB/TrEMBL;Acc:B8N312]
CADAFLAG00001913	AFLA_025370	EQ963473	+	643936–644996		Putative uncharacterized protein [Source:UniProtKB/TrEMBL;Acc:B8N313]
CADAFLAG00001914	AFLA_025380	EQ963473	-	646053-647012	645744-647254	Putative uncharacterized protein [Source:UniProtKB/TrEMBL;Acc:B8N314]
CADAFLAG00001915	AFLA_025390	EQ963473	-	647417–648484		High affinity zinc ion transporter, putative [Source:UniProtKB/TrEMBL;Acc:B8N315]
CADAFLAG00001916	AFLA_025400	EQ963473	+	650581-651983	649094-652273	Probable pectin lyase F [Source:UniProtKB/Swiss-Prot;Acc:B8N316]
CADAFLAG00001917	AFLA_025410	EQ963473	+	653980-656034	653927-656759	C6 finger domain protein, putative [Source:UniProtKB/TrEMBL;Acc:B8N317]
CADAFLAG00001918	AFLA_025420	EQ963473	-	656674-657802	655936-657981	Putative uncharacterized protein [Source:UniProtKB/TrEMBL;Acc:B8N318]
CADAFLAG00001919	AFLA_025430	EQ963473	-	659627-662197	659155-662397	C6 transcription factor, putative [Source:UniProtKB/TrEMBL;Acc:B8N319]
CADAFLAG00001920	AFLA_025440	EQ963473	+	665383-667424	663629-667479	Alpha-L-rhamnosidase A, putative [Source:UniProtKB/TrEMBL;Acc:B8N320]
CADAFLAG00001921	AFLA_025450	EQ963473	-	667716–668702		Oxidoreductase, short chain dehydrogenase/reductase family [Source:UniProtKB/TrEMBL;Acc:B8N321]
CADAFLAG00001922	AFLA_025460	EQ963473	+	669758–671750		Sugar transporter, putative [Source:UniProtKB/TrEMBL;Acc:B8N322]
CADAFLAG00001923	AFLA_025470	EQ963473	+	672366–674916		Putative uncharacterized protein [Source:UniProtKB/TrEMBL;Acc:B8N323]
CADAFLAG00001924	AFLA_025480	EQ963473	-	675053–675929		Putative uncharacterized protein [Source:UniProtKB/TrEMBL;Acc:B8N324]
CADAFLAG00001925	AFLA_025490	EQ963473	+	676392–677030		Putative uncharacterized protein [Source:UniProtKB/TrEMBL;Acc:B8N325]
CADAFLAG00001926	AFLA_025500	EQ963473	+	679716–680210		Putative uncharacterized protein [Source:UniProtKB/TrEMBL;Acc:B8N326]
CADAFLAG00001927	AFLA_025510	EQ963473	+	681774-684566	679417-684845	GPI anchored protein, putative [Source:UniProtKB/TrEMBL;Acc:B8N327]
CADAFLAG00001928	AFLA_025520	EQ963473	+	685372-685743	684935-685994	Putative uncharacterized protein [Source:UniProtKB/TrEMBL;Acc:B8N328]
CADAFLAG00001929	AFLA_025530	EQ963473	-	685908-687101	685647-687417	WD repeat protein [Source:UniProtKB/TrEMBL;Acc:B8N329]
CADAFLAG00001930	AFLA_025540	EQ963473	+	688218–690260		Putative uncharacterized protein [Source:UniProtKB/TrEMBL;Acc:B8N330]
CADAFLAG00001931	AFLA_025550	EQ963473	+	691098–691448		Putative uncharacterized protein [Source:UniProtKB/TrEMBL;Acc:B8N331]
CADAFLAG00001932	AFLA_025560	EQ963473	+	693058–693812		Putative uncharacterized protein [Source:UniProtKB/TrEMBL;Acc:B8N332]
CADAFLAG00001933	AFLA_025570	EQ963473	+	694865-696666	692950-701589	Hexose transporter protein [Source:UniProtKB/TrEMBL;Acc:B8N333]
CADAFLAG00001934	AFLA_025580	EQ963473	+	697033–697785		GAJ protein, putative [Source:UniProtKB/TrEMBL;Acc:B8N334]
CADAFLAG00001935	AFLA_025590	EQ963473	+	698885–701199		pH response protein PalF [Source:UniProtKB/TrEMBL;Acc:B8N335]
CADAFLAG00001936	AFLA_025600	EQ963473	-	703072–703502		Putative uncharacterized protein [Source:UniProtKB/TrEMBL;Acc:B8N336]
CADAFLAG00001937	AFLA_025610	EQ963473	-	708305–708534		Putative uncharacterized protein [Source:UniProtKB/TrEMBL;Acc:B8N337]
CADAFLAG00001938	AFLA_025620	EQ963473	+	709801-710532	709576-710771	Secretory component protein shr3, putative [Source:UniProtKB/TrEMBL;Acc:B8N338]
CADAFLAG00001939	AFLA_025630	EQ963473	-	710674-711931	710504-713669	Putative uncharacterized protein [Source:UniProtKB/TrEMBL;Acc:B8N339]
CADAFLAG00001940	AFLA_025640	EQ963473	-	715234-715743	715234-719292	Putative uncharacterized protein [Source:UniProtKB/TrEMBL;Acc:B8N340]
CADAFLAG00001941	AFLA_025650	EQ963473	-	716257–716931		Putative uncharacterized protein [Source:UniProtKB/TrEMBL;Acc:B8N341]
CADAFLAG00001942	AFLA_025660	EQ963473	+	720075–720851		Rhamnogalacturonan acetylesterase, putative [Source:UniProtKB/TrEMBL;Acc:B8N342]
CADAFLAG00001943	AFLA_025670	EQ963473	-	721650–722533		Putative uncharacterized protein [Source:UniProtKB/TrEMBL;Acc:B8N343]
CADAFLAG00001944	AFLA_025680	EQ963473	+	726300-726572	726262-727807	Putative uncharacterized protein [Source:UniProtKB/TrEMBL;Acc:B8N344]
CADAFLAG00001945	AFLA_025690	EQ963473	-	728604–729080		Putative uncharacterized protein [Source:UniProtKB/TrEMBL;Acc:B8N345]
CADAFLAG00001946	AFLA_025700	EQ963473	+	731932-732336	731331-732612	Putative uncharacterized protein [Source:UniProtKB/TrEMBL;Acc:B8N346]
CADAFLAG00001947	AFLA_025710	EQ963473	-	732517-734446	731361-734489	Aminotriazole resistance protein, putative [Source:UniProtKB/TrEMBL;Acc:B8N347]
CADAFLAG00001948	AFLA_025720	EQ963473	-	735928-738345	735308-738609	C6 transcription factor NosA [Source:UniProtKB/TrEMBL;Acc:B8N348]
CADAFLAG00001949	AFLA_025730	EQ963473	+	742943-744359	742805-747099	Mitochondrial inner membrane metallopeptidase Oma1, putative [Source:UniProtKB/TrEMBL;Acc:B8N349]
CADAFLAG00001950	AFLA_025750	EQ963473	+	744976–746915		T-complex protein 1, theta subunit, putative [Source:UniProtKB/TrEMBL;Acc:B8N350]
CADAFLAG00001951	AFLA_025760	EQ963473	+	747367–748070		50S ribosomal protein L12 [Source:UniProtKB/TrEMBL;Acc:B8N351]
CADAFLAG00001952	AFLA_025770	EQ963473	+	748703-750300	748703-750972	Putative uncharacterized protein [Source:UniProtKB/TrEMBL;Acc:B8N352]
CADAFLAG00001953	AFLA_025780	EQ963473	-	750877-751353	750703-753430	Putative uncharacterized protein [Source:UniProtKB/TrEMBL;Acc:B8N0P3]
CADAFLAG00001954	AFLA_025790	EQ963473	-	751911–752324		Putative uncharacterized protein [Source:UniProtKB/TrEMBL;Acc:B8N0P4]
CADAFLAG00001955	AFLA_025800	EQ963473	-	757497-758781	755875-759713	Putative uncharacterized protein [Source:UniProtKB/TrEMBL;Acc:B8N0P5]
CADAFLAG00001956	AFLA_025810	EQ963473	+	759884–761633		SYF2 splicing factor family protein [Source:UniProtKB/TrEMBL;Acc:B8N0P6]
CADAFLAG00001957	AFLA_025820	EQ963473	-	761239-762305	761024-762407	NAD dependent epimerase/dehydratase, putative [Source:UniProtKB/TrEMBL;Acc:B8N0P7]
CADAFLAG00001958	AFLA_025830	EQ963473	+	762645-763535	762539-763840	Histone acetyltransferase subunit (Yaf9), putative [Source:UniProtKB/TrEMBL;Acc:B8N0P8]
CADAFLAG00001959	AFLA_025840	EQ963473	-	764507-765912	764385-765995	Indoleamine 2,3-dioxygenase pyrrole 2,3-dioxygenase [Source:UniProtKB/TrEMBL;Acc:B8N0P9]
CADAFLAG00001960	AFLA_025850	EQ963473	+	766398–768313		Kynureninase [Source:UniProtKB/TrEMBL;Acc:B8N0Q0]
CADAFLAG00001961	AFLA_025860	EQ963473	-	768398-772070	768398-772182	C6 transcription factor, putative [Source:UniProtKB/TrEMBL;Acc:B8N0Q1]
CADAFLAG00001962	AFLA_025870	EQ963473	+	772471–775056		Putative uncharacterized protein [Source:UniProtKB/TrEMBL;Acc:B8N0Q2]
CADAFLAG00001963	AFLA_025880	EQ963473	+	775819–777094		Putative uncharacterized protein [Source:UniProtKB/TrEMBL;Acc:B8N0Q3]
CADAFLAG00001964	AFLA_025890	EQ963473	+	778077-781891	775285-782136	Inositol-pentakisphosphate 2-kinase, putative [Source:UniProtKB/TrEMBL;Acc:B8N0Q4]
CADAFLAG00001965	AFLA_025900	EQ963473	-	784976–786078		Chitin deacetylase, putative [Source:UniProtKB/TrEMBL;Acc:B8N0Q5]
CADAFLAG00001966	AFLA_025910	EQ963473	-	786948-788572	786948-791421	Putative uncharacterized protein [Source:UniProtKB/TrEMBL;Acc:B8N0Q6]
CADAFLAG00001967	AFLA_025920	EQ963473	-	789316–791080		Mitochondrial distribution and morphology protein 34 [Source:UniProtKB/Swiss-Prot;Acc:B8N0Q7]
CADAFLAG00001968	AFLA_025930	EQ963473	-	792297-796692	791825-797232	ABC transporter, putative [Source:UniProtKB/TrEMBL;Acc:B8N0Q8]
CADAFLAG00001969	AFLA_025940	EQ963473	+	797864-799938	797284-799938	Putative uncharacterized protein [Source:UniProtKB/TrEMBL;Acc:B8N0Q9]
CADAFLAG00001970	AFLA_025950	EQ963473	+	800443–800964		Putative uncharacterized protein [Source:UniProtKB/TrEMBL;Acc:B8N0R0]
CADAFLAG00001971	AFLA_025960	EQ963473	-	801428-802222	801292-802943	Nucleoside transporter family [Source:UniProtKB/TrEMBL;Acc:B8N0R1]
CADAFLAG00001972	AFLA_025970	EQ963473	-	803745-806219	803369-806400	ABC multidrug transporter Mdr2 [Source:UniProtKB/TrEMBL;Acc:B8N0R2]
CADAFLAG00001973	AFLA_025980	EQ963473	+	806741–808278		Hsp90 co-chaperone Cdc37 [Source:UniProtKB/TrEMBL;Acc:B8N0R3]
CADAFLAG00001974	AFLA_025990	EQ963473	-	808756–809713		Clathrin light chain [Source:UniProtKB/TrEMBL;Acc:B8N0R4]
CADAFLAG00001975	AFLA_026000	EQ963473	+	810166-811599	809941-811854	DUF618 domain protein [Source:UniProtKB/TrEMBL;Acc:B8N0R5]
CADAFLAG00001976	AFLA_026010	EQ963473	-	811862-813232	811515-813431	SNARE complex subunit (Tlg2), putative [Source:UniProtKB/TrEMBL;Acc:B8N0R6]
CADAFLAG00001977	AFLA_026020	EQ963473	+	814386-815950	814372-815950	Calmodulin [Source:UniProtKB/TrEMBL;Acc:B8N0R7]
CADAFLAG00001978	AFLA_026030	EQ963473	-	815987-817074	815987-818569	Putative uncharacterized protein [Source:UniProtKB/TrEMBL;Acc:B8N0R8]
CADAFLAG00001979	AFLA_026040	EQ963473	+	818499-820552	817647-820681	Class I alpha-mannosidase [Source:UniProtKB/TrEMBL;Acc:B8N0R9]
CADAFLAG00001980	AFLA_026050	EQ963473	-	820701-822143	820469-823511	Putative uncharacterized protein [Source:UniProtKB/TrEMBL;Acc:B8N0S0]
CADAFLAG00001981	AFLA_026060	EQ963473	+	823427-825350	821777-825350	GABA permease, putative [Source:UniProtKB/TrEMBL;Acc:B8N0S1]
CADAFLAG00001982	AFLA_026070	EQ963473	-	826296–826732		Putative uncharacterized protein [Source:UniProtKB/TrEMBL;Acc:B8N0S2]
CADAFLAG00001983	AFLA_026080	EQ963473	+	834168-834973	834168-838922	Putative uncharacterized protein [Source:UniProtKB/TrEMBL;Acc:B8N0S3]
CADAFLAG00001984	AFLA_026090	EQ963473	-	836989-837834	836989-838922	Putative uncharacterized protein [Source:UniProtKB/TrEMBL;Acc:B8N0S4]
CADAFLAG00001985	AFLA_026100	EQ963473	-	845779-846590	845027-847374	Homeobox transcription factor, putative [Source:UniProtKB/TrEMBL;Acc:B8N0S5]
CADAFLAG00001986	AFLA_026110	EQ963473	-	849333–850000		Putative uncharacterized protein [Source:UniProtKB/TrEMBL;Acc:B8N0S6]
CADAFLAG00001987	AFLA_026120	EQ963473	+	861467–862493		Putative uncharacterized protein [Source:UniProtKB/TrEMBL;Acc:B8N0S7]
CADAFLAG00001988	AFLA_026130	EQ963473	+	862499-863687	860507-864436	Putative uncharacterized protein [Source:UniProtKB/TrEMBL;Acc:B8N0S8]
CADAFLAG00001989	AFLA_026140	EQ963473	-	864734-866782	864734-866853	Alpha-amylase, putative [Source:UniProtKB/TrEMBL;Acc:B8N0S9]
CADAFLAG00001990	AFLA_026150	EQ963473	-	867414-870540	867414-870842	Alpha-glucosidase AgdA, putative [Source:UniProtKB/TrEMBL;Acc:B8N0T0]
CADAFLAG00001991	AFLA_026160	EQ963473	+	872259-874187	872052-874997	C6 transcription factor (AmyR), putative [Source:UniProtKB/TrEMBL;Acc:B8N0T1]
CADAFLAG00001992	AFLA_026170	EQ963473	-	874901-876358	874105-877409	Putative uncharacterized protein [Source:UniProtKB/TrEMBL;Acc:B8N0T2]
CADAFLAG00001993	AFLA_026180	EQ963473	+	876535–876926		Putative uncharacterized protein [Source:UniProtKB/TrEMBL;Acc:B8N0T3]
CADAFLAG00001994	AFLA_026190	EQ963473	+	878497-880617	878343-880832	Signal recognition particle subunit SRP72 [Source:UniProtKB/TrEMBL;Acc:B8N0T4]
CADAFLAG00001995	AFLA_026200	EQ963473	-	880899–882056		NAD binding Rossmann fold oxidoreductase, putative [Source:UniProtKB/TrEMBL;Acc:B8N0T5]
CADAFLAG00001996	AFLA_026210	EQ963473	-	882120-882563	880524-882689	Putative uncharacterized protein [Source:UniProtKB/TrEMBL;Acc:B8N0T6]
CADAFLAG00001997	AFLA_026220	EQ963473	+	883878–884145		Putative uncharacterized protein [Source:UniProtKB/TrEMBL;Acc:B8N0T7]
CADAFLAG00001998	AFLA_026230	EQ963473	+	884453-886600	883420-887845	Putative uncharacterized protein [Source:UniProtKB/TrEMBL;Acc:B8N0T8]
[truncated: 11,877 more rows]

## Sheet: Novel genes
Gene ID	Locus				Blast against Nr database
	Chromosome	Strand	3'-5'		Best hits	E vaule	Score
Novel00001	EQ963472	+	160884–161815
Novel00002	EQ963472	+	190611–191741		gi|599152172|gb|EYE91559.1| hypothetical protein EURHEDRAFT_237382 [Aspergillus ruber CBS 135680]	2.72571e-116	929
Novel00003	EQ963472	+	340291–341042
Novel00004	EQ963472	+	492910–495325
Novel00005	EQ963472	+	670332–670974		gi|145251477|ref|XP_001397252.1| hypothetical protein ANI_1_1750134 [Aspergillus niger CBS 513.88]&gt;gi|134082786|emb|CAK48560.1| unnamed protein product [Aspergillus niger]	7.03556e-17	154
Novel00006	EQ963472	+	928015–928886		gi|169765906|ref|XP_001817424.1| hypothetical protein AOR_1_610174 [Aspergillus oryzae RIB40]&gt;gi|83765279|dbj|BAE55422.1| unnamed protein product [Aspergillus oryzae RIB40]	0	1326
Novel00007	EQ963472	+	1131048–1131860
Novel00008	EQ963472	+	1236035–1236871
Novel00009	EQ963472	+	1278054–1280144
Novel00010	EQ963472	+	1457215–1457565
Novel00011	EQ963472	+	1742963–1743730		gi|317139668|ref|XP_003189190.1| hypothetical protein AOR_1_1108174 [Aspergillus oryzae RIB40]	2.64259e-131	978
Novel00012	EQ963472	+	1781064–1781898		gi|317141203|ref|XP_001817683.2| bis(5&apos;-nucleosyl)-tetraphosphatase [Aspergillus oryzae RIB40]	2.05404e-151	1121
Novel00013	EQ963472	+	2085686–2086967
Novel00014	EQ963472	+	2164891–2167598
Novel00015	EQ963472	+	2307140–2308027
Novel00016	EQ963472	+	2356908–2357235
Novel00017	EQ963472	+	2360444–2362918
Novel00018	EQ963472	+	2460662–2461057
Novel00019	EQ963472	+	2544881–2547191		gi|391870921|gb|EIT80090.1| hypothetical protein Ao3042_03384 [Aspergillus oryzae 3.042]&gt;gi|635509645|gb|KDE81600.1| hypothetical protein AO1008_08099 [Aspergillus oryzae 100-8]	5.91945e-88	714
Novel00020	EQ963472	+	2569588–2571432		gi|317141304|ref|XP_001817937.2| fungal specific transcription factor domain protein [Aspergillus oryzae RIB40]	0	1557
Novel00021	EQ963472	+	2668820–2669512		gi|121706726|ref|XP_001271610.1| conserved hypothetical protein [Aspergillus clavatus NRRL 1]&gt;gi|119399758|gb|EAW10184.1| conserved hypothetical protein [Aspergillus clavatus NRRL 1]	6.16304e-96	772
Novel00022	EQ963472	+	2680636–2681544		gi|317140089|ref|XP_003189235.1| NADH:ubiquinone oxidoreductase 6.6kD subunit [Aspergillus oryzae RIB40]	4.16241e-46	391
Novel00023	EQ963472	+	2773912–2775757
Novel00024	EQ963472	+	2824561–2828245
Novel00025	EQ963472	+	2828409–2829241
Novel00026	EQ963472	+	3019148–3020218		gi|317141319|ref|XP_001818079.2| beta-alanine synthase [Aspergillus oryzae RIB40]	1.32249e-163	1216
Novel00027	EQ963472	+	3145734–3147345
Novel00028	EQ963472	+	3261215–3261781
Novel00029	EQ963472	+	3460245–3461784		gi|635509247|gb|KDE81217.1| mRNA cleavage and polyadenylation factor II complex [Aspergillus oryzae 100-8]	0	1813
Novel00030	EQ963472	+	3604361–3605236
Novel00031	EQ963472	+	3803688–3804669		gi|615426286|ref|XP_007588275.1| putative alpha-l-rhamnosidase protein [Neofusicoccum parvum UCRNP2]&gt;gi|485917196|gb|EOD44240.1| putative alpha-l-rhamnosidase protein [Neofusicoccum parvum UCRNP2]	1.38045e-06	132
Novel00032	EQ963472	+	3894294–3895796
Novel00033	EQ963472	+	4068678–4072470
Novel00034	EQ963472	+	4167026–4168139		gi|67538106|ref|XP_662827.1| hypothetical protein AN5223.2 [Aspergillus nidulans FGSC A4]&gt;gi|40743214|gb|EAA62404.1| predicted protein [Aspergillus nidulans FGSC A4]&gt;gi|259484683|tpe|CBF81114.1| TPA: conserved hypothetical protein [Aspergillus nidulans FGSC A4]	1.08266e-18	230
Novel00035	EQ963472	+	4263450–4264155		gi|83766337|dbj|BAE56480.1| unnamed protein product [Aspergillus oryzae RIB40]	3.60028e-35	351
Novel00036	EQ963472	+	4279380–4281423
Novel00037	EQ963472	+	4307686–4309161		gi|169768054|ref|XP_001818498.1| nucleolus protein required for cell viability [Aspergillus oryzae RIB40]&gt;gi|121805075|sp|Q2UPL9.1|UTP25_ASPOR RecName: Full=U3 small nucleolar RNA-associated protein 25; Short=U3 snoRNA-associated protein 25; AltName: Full=U three protein 25 [Aspergillus oryzae RIB40]&gt;gi|83766353|dbj|BAE56496.1| unnamed protein product [Aspergillus oryzae RIB40]&gt;gi|391869…	0	1717
Novel00038	EQ963472	-	182023–183188		gi|317138959|ref|XP_003189110.1| hypothetical protein AOR_1_92174 [Aspergillus oryzae RIB40]	8.12748e-119	902
Novel00039	EQ963472	-	300629–304000		gi|317139013|ref|XP_003189117.1| hypothetical protein AOR_1_180174 [Aspergillus oryzae RIB40]	0	1907
Novel00040	EQ963472	-	428389–430085		gi|317139076|ref|XP_003189124.1| hypothetical protein AOR_1_268174 [Aspergillus oryzae RIB40]	4.44881e-92	751
Novel00041	EQ963472	-	442491–443539		gi|317139087|ref|XP_001817261.2| FAD binding domain protein [Aspergillus oryzae RIB40]	0	1407
Novel00042	EQ963472	-	492910–495325
Novel00043	EQ963472	-	760619–762192
Novel00044	EQ963472	-	1767393–1769607
Novel00045	EQ963472	-	1849887–1851613		gi|635504682|gb|KDE76767.1| ankyrin repeat protein [Aspergillus oryzae 100-8]	0	2383
Novel00046	EQ963472	-	1889206–1889764		gi|635504783|gb|KDE76868.1| hypothetical protein AO1008_02513 [Aspergillus oryzae 100-8]	7.08205e-43	396
Novel00047	EQ963472	-	1908717–1909761		gi|317141213|ref|XP_001817728.2| acetamidase [Aspergillus oryzae RIB40]	9.26527e-33	333
Novel00048	EQ963472	-	1953946–1954847		gi|119491162|ref|XP_001263203.1| hypothetical protein NFIA_064700 [Neosartorya fischeri NRRL 181]&gt;gi|119411363|gb|EAW21306.1| conserved hypothetical protein [Neosartorya fischeri NRRL 181]	2.63134e-10	153
Novel00049	EQ963472	-	1962598–1963880		gi|317139761|ref|XP_001817745.2| hypothetical protein AOR_1_1242174 [Aspergillus oryzae RIB40]	3.76811e-38	364
Novel00050	EQ963472	-	2022890–2023705		gi|317139783|ref|XP_001817759.2| peptidase family M13 protein [Aspergillus oryzae RIB40]	1.28812e-40	392
Novel00051	EQ963472	-	2161221–2164624		gi|317141223|ref|XP_001817800.2| C2H2 finger domain transcription factor [Aspergillus oryzae RIB40]&gt;gi|391864791|gb|EIT74085.1| hypothetical protein Ao3042_09871 [Aspergillus oryzae 3.042]	2.80948e-163	1278
Novel00052	EQ963472	-	2356905–2357631
Novel00053	EQ963472	-	2483637–2486263
Novel00054	EQ963472	-	2486316–2486766
Novel00055	EQ963472	-	2486984–2488714
Novel00056	EQ963472	-	2536094–2537549		gi|391870941|gb|EIT80110.1| cyclophilin-related peptidyl-prolyl cis-trans isomerase [Aspergillus oryzae 3.042]&gt;gi|635509557|gb|KDE81515.1| cyclophilin-related peptidyl-prolyl cis-trans isomerase [Aspergillus oryzae 100-8]	0	1488
Novel00057	EQ963472	-	2696166–2696649		gi|115388669|ref|XP_001211840.1| conserved hypothetical protein [Aspergillus terreus NIH2624]&gt;gi|114195924|gb|EAU37624.1| conserved hypothetical protein [Aspergillus terreus NIH2624]	3.79117e-17	202
Novel00058	EQ963472	-	2757136–2757931
Novel00059	EQ963472	-	2776384–2777809
Novel00060	EQ963472	-	2817446–2822070
Novel00061	EQ963472	-	2818992–2821846		gi|391873979|gb|EIT82934.1| hypothetical protein Ao3042_11848 [Aspergillus oryzae 3.042]&gt;gi|635509739|gb|KDE81694.1| hypothetical protein AO1008_08000 [Aspergillus oryzae 100-8]	1.82975e-179	1379
Novel00062	EQ963472	-	3234033–3235541		gi|317141327|ref|XP_001818150.2| MFS multidrug transporter [Aspergillus oryzae RIB40]	4.24723e-124	655
Novel00063	EQ963472	-	3421520–3422057		gi|119491959|ref|XP_001263474.1| hypothetical protein NFIA_067440 [Neosartorya fischeri NRRL 181]&gt;gi|119411634|gb|EAW21577.1| hypothetical protein NFIA_067440 [Neosartorya fischeri NRRL 181]	3.8597e-20	209
Novel00064	EQ963472	-	3486648–3488375
Novel00065	EQ963472	-	3802459–3803058		gi|391873305|gb|EIT82358.1| hypothetical protein Ao3042_00479 [Aspergillus oryzae 3.042]&gt;gi|635507829|gb|KDE79828.1| hypothetical protein AO1008_06265 [Aspergillus oryzae 100-8]	8.26745e-20	218
Novel00066	EQ963472	-	3862583–3863675		gi|83766214|dbj|BAE56357.1| unnamed protein product [Aspergillus oryzae RIB40]&gt;gi|391870624|gb|EIT79804.1| tRNA-dihydrouridine synthase [Aspergillus oryzae 3.042]&gt;gi|635507882|gb|KDE79879.1| tRNA-dihydrouridine [Aspergillus oryzae 100-8]	1.32608e-99	792
Novel00067	EQ963472	-	3894294–3895796
Novel00068	EQ963472	-	3935799–3937080
Novel00069	EQ963472	-	3977808–3986638		gi|391870589|gb|EIT79769.1| hypothetical protein Ao3042_03803 [Aspergillus oryzae 3.042]&gt;gi|635507874|gb|KDE79871.1| hypothetical protein AO1008_06202 [Aspergillus oryzae 100-8]	0	14445
Novel00070	EQ963472	-	4012634–4015091
Novel00071	EQ963472	-	4154819–4156220
Novel00072	EQ963472	-	4416793–4417632		gi|317141007|ref|XP_003189317.1| hypothetical protein AOR_1_2870174 [Aspergillus oryzae RIB40]	9.19918e-29	284
Novel00073	EQ963472	-	4449345–4451342		gi|425776806|gb|EKV15009.1| hypothetical protein PDIP_41790 [Penicillium digitatum Pd1]&gt;gi|425781387|gb|EKV19357.1| hypothetical protein PDIG_03140 [Penicillium digitatum PHI26]	3.63248e-17	211
Novel00074	EQ963472	-	4452409–4454150		gi|317141027|ref|XP_001818549.2| DASH complex subunit DAD2 [Aspergillus oryzae RIB40]&gt;gi|391869878|gb|EIT79068.1| hypothetical protein Ao3042_04445 [Aspergillus oryzae 3.042]	1.27083e-65	550
Novel00075	EQ963473	+	129739–131002
Novel00076	EQ963473	+	147385–148638		gi|317145196|ref|XP_003189682.1| hypothetical protein AOR_1_2950154 [Aspergillus oryzae RIB40]	1.38346e-36	335
Novel00077	EQ963473	+	201424–203045		gi|317144969|ref|XP_003189648.1| hypothetical protein AOR_1_2604154 [Aspergillus oryzae RIB40]	2.36716e-35	336
Novel00078	EQ963473	+	531750–533277		gi|628269788|ref|XP_007730741.1| hypothetical protein A1O3_02411 [Capronia epimyces CBS 606.96]&gt;gi|590014142|gb|EXJ89344.1| hypothetical protein A1O3_02411 [Capronia epimyces CBS 606.96]	6.4986e-27	114
Novel00079	EQ963473	+	850449–852220
Novel00080	EQ963473	+	1078281–1084236		gi|134074548|emb|CAK38841.1| hypothetical protein An04g05783 [Aspergillus niger]	3.03901e-17	225
Novel00081	EQ963473	+	1293794–1294912		gi|169771397|ref|XP_001820168.1| vacuolar protein sorting-associated protein vps13 [Aspergillus oryzae RIB40]&gt;gi|83768027|dbj|BAE58166.1| unnamed protein product [Aspergillus oryzae RIB40]	6.42212e-118	987
Novel00082	EQ963473	+	1337671–1340270
Novel00083	EQ963473	+	1349478–1350537
Novel00084	EQ963473	+	1552334–1553923		gi|317144364|ref|XP_003189593.1| hypothetical protein AOR_1_1706154 [Aspergillus oryzae RIB40]	0	1593
Novel00085	EQ963473	+	1588413–1589661		gi|358370492|dbj|GAA87103.1| D-alanine--D-alanine ligase [Aspergillus kawachii IFO 4308]	2.95503e-51	298
Novel00086	EQ963473	+	1864339–1866380
Novel00087	EQ963473	+	2348476–2350347
Novel00088	EQ963473	+	2411928–2414210		gi|317143948|ref|XP_003189551.1| hypothetical protein AOR_1_1138154 [Aspergillus oryzae RIB40]	4.12133e-49	439
Novel00089	EQ963473	+	2417448–2418251		gi|317143945|ref|XP_001819803.2| hypothetical protein AOR_1_1134154 [Aspergillus oryzae RIB40]	1.0564e-31	306
Novel00090	EQ963473	+	2485102–2486934
Novel00091	EQ963473	+	2628178–2631004
Novel00092	EQ963473	+	2756143–2757538		gi|169770451|ref|XP_001819695.1| endo-rhamnogalacturonase F [Aspergillus oryzae RIB40]&gt;gi|83767554|dbj|BAE57693.1| unnamed protein product [Aspergillus oryzae RIB40]	0	1790
Novel00093	EQ963473	+	2763940–2765463		gi|317143768|ref|XP_001819692.2| hypothetical protein AOR_1_910154 [Aspergillus oryzae RIB40]&gt;gi|391867395|gb|EIT76641.1| hypothetical protein Ao3042_07193 [Aspergillus oryzae 3.042]&gt;gi|635508265|gb|KDE80249.1| hypothetical protein AO1008_06604 [Aspergillus oryzae 100-8]	0	2019
Novel00094	EQ963473	+	2768432–2771969
Novel00095	EQ963473	+	2931761–2933509		gi|317143703|ref|XP_001819635.2| rho guanyl nucleotide exchange factor [Aspergillus oryzae RIB40]	0	1769
Novel00096	EQ963473	+	3012975–3014637
Novel00097	EQ963473	+	3108013–3109634
Novel00098	EQ963473	+	3518489–3519585		gi|584408835|emb|CDM35749.1| unnamed protein product [Penicillium roqueforti FM164]	1.09973e-08	140
Novel00099	EQ963473	+	3685641–3686812		gi|317145088|ref|XP_003189665.1| hypothetical protein AOR_1_2778154 [Aspergillus oryzae RIB40]	1.99003e-22	240
Novel00100	EQ963473	+	3846640–3849504
Novel00101	EQ963473	+	3951872–3953237		gi|317143199|ref|XP_003189480.1| UDP-N-acetylglucosamine transferase subunit alg14 [Aspergillus oryzae RIB40]	0	1477
Novel00102	EQ963473	-	201619–202917		gi|317144969|ref|XP_003189648.1| hypothetical protein AOR_1_2604154 [Aspergillus oryzae RIB40]	2.06494e-15	190
Novel00103	EQ963473	-	279981–280873		gi|83768357|dbj|BAE58496.1| unnamed protein product [Aspergillus oryzae RIB40]	2.51032e-120	909
Novel00104	EQ963473	-	281301–281942		gi|317145180|ref|XP_001820498.2| hypothetical protein AOR_1_2932154 [Aspergillus oryzae RIB40]	1.16498e-26	275
Novel00105	EQ963473	-	531750–533277		gi|628269788|ref|XP_007730741.1| hypothetical protein A1O3_02411 [Capronia epimyces CBS 606.96]&gt;gi|590014142|gb|EXJ89344.1| hypothetical protein A1O3_02411 [Capronia epimyces CBS 606.96]	1.44317e-27	148
Novel00106	EQ963473	-	563197–566101
Novel00107	EQ963473	-	753984–755553
Novel00108	EQ963473	-	856303–859460
Novel00109	EQ963473	-	1246589–1250233
Novel00110	EQ963473	-	1477371–1479830
Novel00111	EQ963473	-	1622772–1623739		gi|317144334|ref|XP_003189590.1| hypothetical protein AOR_1_1656154 [Aspergillus oryzae RIB40]	2.05509e-09	127
Novel00112	EQ963473	-	1687551–1688367		gi|169771121|ref|XP_001820030.1| F-box domain protein [Aspergillus oryzae RIB40]&gt;gi|83767889|dbj|BAE58028.1| unnamed protein product [Aspergillus oryzae RIB40]	3.50516e-109	862
Novel00113	EQ963473	-	1721053–1723051
Novel00114	EQ963473	-	1742833–1744898
Novel00115	EQ963473	-	1872853–1874487		gi|380476300|emb|CCF44786.1| serine/threonine-protein phosphatase PP1 [Colletotrichum higginsianum]	2.75504e-65	545
Novel00116	EQ963473	-	1874741–1875682
Novel00117	EQ963473	-	1983720–1987586
Novel00118	EQ963473	-	2201004–2202348
Novel00119	EQ963473	-	2290655–2292035		gi|317143996|ref|XP_003189556.1| hypothetical protein AOR_1_1210154 [Aspergillus oryzae RIB40]	2.49597e-99	774
Novel00120	EQ963473	-	2338779–2341346
Novel00121	EQ963473	-	2417544–2418235
Novel00122	EQ963473	-	2533734–2535396
Novel00123	EQ963473	-	2768432–2771969
Novel00124	EQ963473	-	2843796–2845110
Novel00125	EQ963473	-	2867808–2869064		gi|358367279|dbj|GAA83898.1| hypothetical protein AKAW_02013 [Aspergillus kawachii IFO 4308]	1.02329e-14	163
Novel00126	EQ963473	-	3031407–3032482
Novel00127	EQ963473	-	3398739–3400211
Novel00128	EQ963473	-	3606631–3608549
Novel00129	EQ963473	-	3625375–3627383
Novel00130	EQ963473	-	3660358–3661437
Novel00131	EQ963473	-	3714426–3715647
Novel00132	EQ963473	-	3721994–3722896		gi|317145086|ref|XP_001819383.2| hypothetical protein AOR_1_2776154 [Aspergillus oryzae RIB40]	4.87913e-64	524
Novel00133	EQ963473	-	3762910–3765924
Novel00134	EQ963473	-	3967507–3968501
Novel00135	EQ963473	-	3975332–3977474
Novel00136	EQ963473	-	4106064–4106772		gi|584410937|emb|CDM34971.1| Succinate dehydrogenase assembly factor 1 homolog A, mitochondrial [Penicillium roqueforti FM164]	2.5074e-22	186
Novel00137	EQ963474	+	6311–7909
Novel00138	EQ963474	+	28973–29716
Novel00139	EQ963474	+	313852–314851
Novel00140	EQ963474	+	354452–354905		gi|83770222|dbj|BAE60355.1| unnamed protein product [Aspergillus oryzae RIB40]	2.86817e-55	473
Novel00141	EQ963474	+	452205–458383		gi|391866884|gb|EIT76152.1| putative esterase of the alpha-beta hydrolase superfamily [Aspergillus oryzae 3.042]&gt;gi|635504318|gb|KDE76413.1| putative esterase of the alpha-beta hydrolase [Aspergillus oryzae 100-8]	0	4533
Novel00142	EQ963474	+	469134–470587		gi|425768182|gb|EKV06718.1| Got1 family protein [Penicillium digitatum Pd1]&gt;gi|425769942|gb|EKV08420.1| Got1 family protein [Penicillium digitatum PHI26]	6.12948e-47	402
Novel00143	EQ963474	+	658778–659203
Novel00144	EQ963474	+	759838–760592		gi|317136854|ref|XP_003189989.1| hypothetical protein AOR_1_506194 [Aspergillus oryzae RIB40]	1.34496e-33	309
Novel00145	EQ963474	+	771567–772173
Novel00146	EQ963474	+	782222–787036
Novel00147	EQ963474	+	851214–851560		gi|259480484|tpe|CBF71659.1| TPA: Putative Zn(II)2Cys6 transcription factor (Eurofung) [Aspergillus nidulans FGSC A4]	1.36245e-20	228
Novel00148	EQ963474	+	896662–897518		gi|391866871|gb|EIT76139.1| glycoside hydrolase family 43 [Aspergillus oryzae 3.042]&gt;gi|635504264|gb|KDE76362.1| glycoside hydrolase family 43 [Aspergillus oryzae 100-8]	4.23824e-130	632
Novel00149	EQ963474	+	897605–898660		gi|391866871|gb|EIT76139.1| glycoside hydrolase family 43 [Aspergillus oryzae 3.042]&gt;gi|635504264|gb|KDE76362.1| glycoside hydrolase family 43 [Aspergillus oryzae 100-8]	8.69099e-123	950
Novel00150	EQ963474	+	978416–979003		gi|317137856|ref|XP_003190100.1| hypothetical protein AOR_1_1896194 [Aspergillus oryzae RIB40]	6.78697e-44	374
Novel00151	EQ963474	+	1305132–1307949		gi|667517439|gb|KFA46885.1| hypothetical protein S40293_03655 [Stachybotrys chartarum IBT 40293]	6.99449e-08	152
Novel00152	EQ963474	+	1454221–1455698
Novel00153	EQ963474	+	1868391–1869003		gi|169763572|ref|XP_001727686.1| DASH complex subunit ask1 [Aspergillus oryzae RIB40]&gt;gi|83770714|dbj|BAE60847.1| unnamed protein product [Aspergillus oryzae RIB40]&gt;gi|391869721|gb|EIT78916.1| DASH complex subunit ask1 [Aspergillus oryzae 3.042]&gt;gi|635513017|gb|KDE84866.1| DASH complex subunit ask1 [Aspergillus oryzae 100-8]	1.00429e-83	670
Novel00154	EQ963474	+	2013856–2014652
Novel00155	EQ963474	+	2243324–2245212
Novel00156	EQ963474	+	2328215–2328401
Novel00157	EQ963474	+	2565694–2567033
Novel00158	EQ963474	+	2650794–2652264
Novel00159	EQ963474	+	2652385–2654055
Novel00160	EQ963474	-	181030–182076		gi|391866801|gb|EIT76069.1| hypothetical protein Ao3042_07777 [Aspergillus oryzae 3.042]&gt;gi|635504394|gb|KDE76489.1| hypothetical protein AO1008_02105 [Aspergillus oryzae 100-8]	9.43644e-10	153
Novel00161	EQ963474	-	313840–314787
Novel00162	EQ963474	-	466798–467427		gi|296818853|ref|XP_002849763.1| DASH complex subunit DAD4 [Arthroderma otae CBS 113480]&gt;gi|238840216|gb|EEQ29878.1| DASH complex subunit DAD4 [Arthroderma otae CBS 113480]	1.00653e-15	184
Novel00163	EQ963474	-	633060–634023
Novel00164	EQ963474	-	716919–717369		gi|83770347|dbj|BAE60480.1| unnamed protein product [Aspergillus oryzae RIB40]	8.6629e-36	325
Novel00165	EQ963474	-	782222–787036
Novel00166	EQ963474	-	880548–881929		gi|317136920|ref|XP_001727376.2| hypothetical protein AOR_1_590194 [Aspergillus oryzae RIB40]	2.03556e-135	1032
Novel00167	EQ963474	-	963569–965421		gi|599151852|gb|EYE91263.1| hypothetical protein EURHEDRAFT_526329 [Aspergillus ruber CBS 135680]	6.00113e-55	337
Novel00168	EQ963474	-	1068802–1069736
Novel00169	EQ963474	-	1454792–1455564
Novel00170	EQ963474	-	1554306–1555385		gi|317137240|ref|XP_003190034.1| mitogen-activated protein kinase mpkC [Aspergillus oryzae RIB40]&gt;gi|58430583|dbj|BAD89083.1| mitogen-activated protein kinase HOGA [Aspergillus oryzae]&gt;gi|391869597|gb|EIT78792.1| mitogen-activated protein kinase [Aspergillus oryzae 3.042]&gt;gi|635508025|gb|KDE80019.1| mitogen-activated protein [Aspergillus oryzae 100-8]	1.17385e-59	330
Novel00171	EQ963474	-	1555542–1556786		gi|295674901|ref|XP_002797996.1| mitogen-activated protein kinase HOG1 [Paracoccidioides sp. &apos;lutzii&apos; Pb01]&gt;gi|226280646|gb|EEH36212.1| mitogen-activated protein kinase HOG1 [Paracoccidioides sp. &apos;lutzii&apos; Pb01]	1.81387e-41	305
Novel00172	EQ963474	-	1624769–1626168		gi|317137269|ref|XP_003190038.1| hypothetical protein AOR_1_1080194 [Aspergillus oryzae RIB40]	1.42933e-91	753
Novel00173	EQ963474	-	1688194–1690420
Novel00174	EQ963474	-	1825853–1828611		gi|169763548|ref|XP_001727674.1| hypothetical protein AOR_1_1224194 [Aspergillus oryzae RIB40]&gt;gi|83770702|dbj|BAE60835.1| unnamed protein product [Aspergillus oryzae RIB40]	0	2060
Novel00175	EQ963474	-	1842771–1844812		gi|134055371|emb|CAK43925.1| unnamed protein product [Aspergillus niger]	2.55365e-69	637
Novel00176	EQ963474	-	1924211–1924728
Novel00177	EQ963474	-	2013861–2014577
Novel00178	EQ963474	-	2077497–2078398		gi|317137475|ref|XP_001727744.2| hypothetical protein AOR_1_1376194 [Aspergillus oryzae RIB40]	9.35284e-41	370
Novel00179	EQ963474	-	2161915–2163172
Novel00180	EQ963474	-	2188310–2189783		gi|169763776|ref|XP_001727788.1| protein pns1 [Aspergillus oryzae RIB40]&gt;gi|83770816|dbj|BAE60949.1| unnamed protein product [Aspergillus oryzae RIB40]&gt;gi|391870195|gb|EIT79381.1| choline transporter-like protein [Aspergillus oryzae 3.042]&gt;gi|635504995|gb|KDE77074.1| choline transporter-like protein [Aspergillus oryzae 100-8]	1.01029e-139	1082
Novel00181	EQ963474	-	2194110–2195479
Novel00182	EQ963474	-	2282690–2284215		gi|258570283|ref|XP_002543945.1| predicted protein [Uncinocarpus reesii 1704]&gt;gi|237904215|gb|EEP78616.1| predicted protein [Uncinocarpus reesii 1704]	1.19881e-20	190
Novel00183	EQ963474	-	2294473–2295559
Novel00184	EQ963474	-	2315128–2315732
Novel00185	EQ963475	+	202874–204601
Novel00186	EQ963475	+	424584–426630		gi|391865688|gb|EIT74967.1| hypothetical protein Ao3042_08740 [Aspergillus oryzae 3.042]&gt;gi|635502863|gb|KDE75027.1| hypothetical protein AO1008_00777 [Aspergillus oryzae 100-8]	0	1364
Novel00187	EQ963475	+	572503–575685		gi|169772625|ref|XP_001820781.1| ATP-citrate synthase subunit 1 [Aspergillus oryzae RIB40]&gt;gi|83768642|dbj|BAE58779.1| unnamed protein product [Aspergillus oryzae RIB40]&gt;gi|391865879|gb|EIT75158.1| ATP-citrate lyase [Aspergillus oryzae 3.042]&gt;gi|635509483|gb|KDE81444.1| ATP-citrate lyase [Aspergillus oryzae 100-8]	0	1912
Novel00188	EQ963475	+	637439–638227		gi|317145493|ref|XP_003189708.1| hypothetical protein AOR_1_468144 [Aspergillus oryzae RIB40]	0	1573
Novel00189	EQ963475	+	728498–729853		gi|67540596|ref|XP_664072.1| hypothetical protein AN6468.2 [Aspergillus nidulans FGSC A4]&gt;gi|40739300|gb|EAA58490.1| hypothetical protein AN6468.2 [Aspergillus nidulans FGSC A4]&gt;gi|259479298|tpe|CBF69405.1| TPA: conserved hypothetical protein [Aspergillus nidulans FGSC A4]	5.80207e-11	171
Novel00190	EQ963475	+	1042830–1044302
Novel00191	EQ963475	+	1143782–1144442
Novel00192	EQ963475	+	1423089–1424119		gi|584411072|emb|CDM35107.1| Protein of unknown function DUF3435 [Penicillium roqueforti FM164]	1.15463e-90	321
Novel00193	EQ963475	+	1606920–1608300
Novel00194	EQ963475	+	1734314–1736265
Novel00195	EQ963475	+	1830253–1832105		gi|83769077|dbj|BAE59214.1| unnamed protein product [Aspergillus oryzae RIB40]&gt;gi|391866014|gb|EIT75292.1| synaptic vesicle transporter SVOP [Aspergillus oryzae 3.042]&gt;gi|635510763|gb|KDE82687.1| synaptic vesicle transporter SVOP [Aspergillus oryzae 100-8]	0	1690
Novel00196	EQ963475	+	1865507–1866865		gi|317146054|ref|XP_003189766.1| GNAT family acetyltransferase Nat4 [Aspergillus oryzae RIB40]	0	1427
Novel00197	EQ963475	+	1979232–1980467		gi|317146157|ref|XP_003189775.1| cytochrome c oxidase-assembly factor cox23 [Aspergillus oryzae RIB40]	1.48651e-53	451
Novel00198	EQ963475	+	2173653–2175339
Novel00199	EQ963475	+	2279519–2281645		gi|317146264|ref|XP_001821401.2| hypothetical protein AOR_1_1590144 [Aspergillus oryzae RIB40]	1.50197e-48	478
Novel00200	EQ963475	+	2378414–2382279
Novel00201	EQ963475	+	2555536–2556278
Novel00202	EQ963475	+	2577713–2578932
Novel00203	EQ963475	-	354369–355224		gi|317145338|ref|XP_003189696.1| hypothetical protein AOR_1_218144 [Aspergillus oryzae RIB40]	7.36294e-100	774
Novel00204	EQ963475	-	377999–379222		gi|83768569|dbj|BAE58706.1| unnamed protein product [Aspergillus oryzae RIB40]	3.45969e-12	190
Novel00205	EQ963475	-	386298–390789
Novel00206	EQ963475	-	415006–415966		gi|317146484|ref|XP_001820808.2| hypothetical protein AOR_1_1896144 [Aspergillus oryzae RIB40]	0	4333
Novel00207	EQ963475	-	644613–648535
Novel00208	EQ963475	-	1012327–1012728		gi|391865689|gb|EIT74968.1| hypothetical protein Ao3042_08955 [Aspergillus oryzae 3.042]&gt;gi|635509279|gb|KDE81246.1| hypothetical protein AO1008_07832 [Aspergillus oryzae 100-8]	2.66448e-52	469
Novel00209	EQ963475	-	1030163–1031611
Novel00210	EQ963475	-	1333433–1338007		gi|317145794|ref|XP_003189739.1| hypothetical protein AOR_1_924144 [Aspergillus oryzae RIB40]	1.8281e-111	845
Novel00211	EQ963475	-	1435706–1436659		gi|317145804|ref|XP_003189742.1| hypothetical protein AOR_1_936144 [Aspergillus oryzae RIB40]	1.59794e-78	648
Novel00212	EQ963475	-	1450542–1451717
Novel00213	EQ963475	-	1534386–1536018
Novel00214	EQ963475	-	1688432–1688861
Novel00215	EQ963475	-	1731152–1733319
Novel00216	EQ963475	-	2495708–2497273
Novel00217	EQ963476	+	40021–40869		gi|159122686|gb|EDP47807.1| conserved hypothetical protein [Aspergillus fumigatus A1163]	1.04597e-90	612
Novel00218	EQ963476	+	629676–631729		gi|317148558|ref|XP_003190208.1| hypothetical protein AOR_1_1226134 [Aspergillus oryzae RIB40]	2.05117e-49	481
Novel00219	EQ963476	+	644708–649468		gi|475672552|gb|EMT69710.1| hypothetical protein FOC4_g10000990 [Fusarium oxysporum f. sp. cubense race 4]	4.19217e-12	179
Novel00220	EQ963476	+	728139–729419		gi|317156695|ref|XP_003190760.1| hypothetical protein AOR_1_464054 [Aspergillus oryzae RIB40]	2.34755e-51	441
Novel00221	EQ963476	+	792628–793840
Novel00222	EQ963476	+	856408–856845		gi|526196121|gb|EPS37548.1| hypothetical protein H072_8823 [Dactylellina haptotyla CBS 200.50]	4.54641e-32	322
Novel00223	EQ963476	+	911312–912834
Novel00224	EQ963476	+	981718–982983		gi|317156823|ref|XP_003190771.1| hypothetical protein AOR_1_662054 [Aspergillus oryzae RIB40]	1.2076e-70	588
Novel00225	EQ963476	+	1079302–1080885		gi|317156845|ref|XP_003190775.1| hypothetical protein AOR_1_686054 [Aspergillus oryzae RIB40]	3.34186e-64	519
Novel00226	EQ963476	+	1113501–1114318
Novel00227	EQ963476	+	1307746–1309102		gi|171684815|ref|XP_001907349.1| hypothetical protein [Podospora anserina S mat+]&gt;gi|170942368|emb|CAP68020.1| unnamed protein product [Podospora anserina S mat+]&gt;gi|681093874|emb|CDP24279.1| Putative protein of unknown function [Podospora anserina S mat+]	4.16845e-10	167
Novel00228	EQ963476	+	1323433–1325034		gi|599156482|gb|EYE95630.1| benzoate 4-monooxygenase cytochrome P450 [Aspergillus ruber CBS 135680]	1.50563e-13	194
Novel00229	EQ963476	+	1351410–1353192		gi|317156979|ref|XP_003190789.1| hypothetical protein AOR_1_892054 [Aspergillus oryzae RIB40]	1.86588e-44	388
Novel00230	EQ963476	+	1389344–1390866
Novel00231	EQ963476	+	1419130–1420988		gi|261201011|ref|XP_002626906.1| conserved hypothetical protein [Ajellomyces dermatitidis SLH14081]&gt;gi|239593978|gb|EEQ76559.1| conserved hypothetical protein [Ajellomyces dermatitidis SLH14081]&gt;gi|239607146|gb|EEQ84133.1| conserved hypothetical protein [Ajellomyces dermatitidis ER-3]&gt;gi|327351099|gb|EGE79956.1| hypothetical protein BDDG_02897 [Ajellomyces dermatitidis ATCC 18188]&gt;gi|…	8.80352e-16	194
Novel00232	EQ963476	+	1421172–1422789
Novel00233	EQ963476	+	1470237–1471473		gi|317157040|ref|XP_003190796.1| hypothetical protein AOR_1_968054 [Aspergillus oryzae RIB40]	2.59468e-83	689
Novel00234	EQ963476	+	1511071–1513401		gi|83772374|dbj|BAE62504.1| unnamed protein product [Aspergillus oryzae RIB40]	1.70015e-10	162
Novel00235	EQ963476	+	1732341–1733346
Novel00236	EQ963476	+	1791090–1791543		gi|83775052|dbj|BAE65175.1| unnamed protein product [Aspergillus oryzae RIB40]	9.58877e-31	309
Novel00237	EQ963476	+	1830156–1830757		gi|391869430|gb|EIT78628.1| hypothetical protein Ao3042_04891 [Aspergillus oryzae 3.042]&gt;gi|635513071|gb|KDE84918.1| hypothetical protein AO1008_00200 [Aspergillus oryzae 100-8]	7.17933e-64	406
Novel00238	EQ963476	+	1909537–1911467
Novel00239	EQ963476	+	1912995–1913900		gi|391869420|gb|EIT78618.1| DEAH-box RNA helicase [Aspergillus oryzae 3.042]&gt;gi|635513069|gb|KDE84916.1| DEAH-box RNA helicase [Aspergillus oryzae 100-8]	0	1420
Novel00240	EQ963476	+	1930124–1930634		gi|391869480|gb|EIT78678.1| phosphotransferase family protein [Aspergillus oryzae 3.042]&gt;gi|635510491|gb|KDE82420.1| phosphotransferase family protein [Aspergillus oryzae 100-8]	5.02641e-41	397
Novel00241	EQ963476	+	2021540–2022696		gi|317157663|ref|XP_001826402.2| hypothetical protein AOR_1_1870054 [Aspergillus oryzae RIB40]	0	2209
Novel00242	EQ963476	+	2134656–2135831		gi|317157329|ref|XP_001826403.2| hypothetical protein AOR_1_1390054 [Aspergillus oryzae RIB40]	9.41767e-54	450
Novel00243	EQ963476	+	2162589–2164681
Novel00244	EQ963476	+	2165862–2166797
Novel00245	EQ963476	+	2377967–2382078
Novel00246	EQ963476	+	2410353–2412328
Novel00247	EQ963476	+	2480586–2481592		gi|169782552|ref|XP_001825738.1| nonribosomal peptide synthase [Aspergillus oryzae RIB40]&gt;gi|83774482|dbj|BAE64605.1| unnamed protein product [Aspergillus oryzae RIB40]	0	15002
Novel00248	EQ963476	-	40021–40865
Novel00249	EQ963476	-	131763–141480		gi|584407822|emb|CDM36650.1| Zn(2)-C6 fungal-type DNA-binding domain [Penicillium roqueforti FM164]	4.14915e-27	296
Novel00250	EQ963476	-	152516–154447		gi|391865192|gb|EIT74483.1| hypothetical protein Ao3042_09699 [Aspergillus oryzae 3.042]&gt;gi|635505776|gb|KDE77834.1| hypothetical protein AO1008_04107 [Aspergillus oryzae 100-8]	9.86234e-18	195
Novel00251	EQ963476	-	290942–291905		gi|296826144|ref|XP_002850926.1| predicted protein [Arthroderma otae CBS 113480]&gt;gi|238838480|gb|EEQ28142.1| predicted protein [Arthroderma otae CBS 113480]	4.72562e-07	127
Novel00252	EQ963476	-	615911–616467		gi|159122686|gb|EDP47807.1| conserved hypothetical protein [Aspergillus fumigatus A1163]	4.38525e-30	322
Novel00253	EQ963476	-	628616–629539		gi|317156665|ref|XP_003190753.1| fungal specific transcription factor [Aspergillus oryzae RIB40]	2.63967e-108	871
Novel00254	EQ963476	-	629676–631729		gi|317156665|ref|XP_003190753.1| fungal specific transcription factor [Aspergillus oryzae RIB40]	2.0535e-37	354
Novel00255	EQ963476	-	714662–716094		gi|317156739|ref|XP_003190766.1| hypothetical protein AOR_1_532054 [Aspergillus oryzae RIB40]	0	1430
Novel00256	EQ963476	-	716273–716898		gi|317156823|ref|XP_003190771.1| hypothetical protein AOR_1_662054 [Aspergillus oryzae RIB40]	4.20972e-32	315
Novel00257	EQ963476	-	868057–870671
Novel00258	EQ963476	-	1079555–1080776		gi|317141586|ref|XP_001818721.2| benzoate 4-monooxygenase cytochrome P450 [Aspergillus oryzae RIB40]&gt;gi|293329725|dbj|BAJ04372.1| cytochrome P450 monooxygenase [Aspergillus oryzae]	4.35856e-13	181
Novel00259	EQ963476	-	1323869–1325014		gi|599156482|gb|EYE95630.1| benzoate 4-monooxygenase cytochrome P450 [Aspergillus ruber CBS 135680]	1.12965e-09	161
Novel00260	EQ963476	-	1350372–1351206
Novel00261	EQ963476	-	1351680–1353173
Novel00262	EQ963476	-	1472096–1473726
Novel00263	EQ963476	-	1656636–1657735		gi|391869437|gb|EIT78635.1| hypothetical protein Ao3042_04934 [Aspergillus oryzae 3.042]&gt;gi|635510561|gb|KDE82490.1| hypothetical protein AO1008_08902 [Aspergillus oryzae 100-8]	0	2495
Novel00264	EQ963476	-	1746071–1746998
Novel00265	EQ963476	-	2023612–2026249		gi|391869512|gb|EIT78709.1| C6 finger domain protein [Aspergillus oryzae 3.042]&gt;gi|635510553|gb|KDE82482.1| C6 finger domain protein [Aspergillus oryzae 100-8]	0	2668
Novel00266	EQ963476	-	2209558–2209960
Novel00267	EQ963476	-	2365646–2374627
Novel00268	EQ963476	-	2377967–2382078
Novel00269	EQ963476	-	2414962–2416729		gi|317148882|ref|XP_003190249.1| hypothetical protein AOR_1_176114 [Aspergillus oryzae RIB40]	1.82257e-85	671
Novel00270	EQ963477	+	45583–47198		gi|317149819|ref|XP_001823075.2| UMTA methyltransferase family protein [Aspergillus oryzae RIB40]	8.79949e-59	482
Novel00271	EQ963477	+	252583–253675		gi|317149027|ref|XP_001823076.2| integral membrane protein [Aspergillus oryzae RIB40]	0	1385
Novel00272	EQ963477	+	548056–548575
Novel00273	EQ963477	+	551753–553959		gi|317149171|ref|XP_003190280.1| alkaline phytoceramidase [Aspergillus oryzae RIB40]	1.0023e-138	1025
Novel00274	EQ963477	+	856865–857832		gi|317149839|ref|XP_001823212.2| arylsulfatase precursor [Aspergillus oryzae RIB40]	0	1684
Novel00275	EQ963477	+	865841–866616		gi|317149244|ref|XP_003190291.1| cellobiose dehydrogenase [Aspergillus oryzae RIB40]	0	3524
Novel00276	EQ963477	+	954575–956704		gi|391872630|gb|EIT81732.1| hypothetical protein Ao3042_01716 [Aspergillus oryzae 3.042]	8.69596e-36	352
Novel00277	EQ963477	+	1035986–1039877
Novel00278	EQ963477	+	1516156–1518233
Novel00279	EQ963477	+	1852243–1854682
Novel00280	EQ963477	+	1874958–1876560
Novel00281	EQ963477	+	2097159–2098403		gi|391872291|gb|EIT81425.1| C6 transcription factor, putative [Aspergillus oryzae 3.042]	1.89147e-126	997
Novel00282	EQ963477	+	2129041–2131067
Novel00283	EQ963477	+	2144138–2146889
Novel00284	EQ963477	-	282387–283477		gi|317148910|ref|XP_001823002.2| mRNA binding protein Pumilio 2 [Aspergillus oryzae RIB40]&gt;gi|635508600|gb|KDE80580.1| translational repressor Pumilio/PUF3 [Aspergillus oryzae 100-8]	8.83993e-87	762
Novel00285	EQ963477	-	283942–286762
Novel00286	EQ963477	-	322236–324480
Novel00287	EQ963477	-	327439–328613		gi|317149833|ref|XP_001823194.2| FAD-dependent oxygenase [Aspergillus oryzae RIB40]	1.59381e-140	1098
Novel00288	EQ963477	-	740511–740838		gi|134078020|emb|CAK49085.1| unnamed protein product [Aspergillus niger]	6.20185e-11	150
Novel00289	EQ963477	-	892825–894800		gi|169777835|ref|XP_001823383.1| MFS multidrug transporter [Aspergillus oryzae RIB40]&gt;gi|83772120|dbj|BAE62250.1| unnamed protein product [Aspergillus oryzae RIB40]&gt;gi|391871359|gb|EIT80519.1| putative transporter [Aspergillus oryzae 3.042]&gt;gi|635508956|gb|KDE80931.1| putative transporter [Aspergillus oryzae 100-8]	1.95122e-69	451
Novel00290	EQ963477	-	1334403–1334947		gi|258574343|ref|XP_002541353.1| conserved hypothetical protein [Uncinocarpus reesii 1704]&gt;gi|237901619|gb|EEP76020.1| conserved hypothetical protein [Uncinocarpus reesii 1704]	2.3342e-09	159
Novel00291	EQ963477	-	1469754–1470690
Novel00292	EQ963477	-	1804114–1805618		gi|391874199|gb|EIT83121.1| acyl-CoA diacylglycerol acyltransferase [Aspergillus oryzae 3.042]&gt;gi|635507781|gb|KDE79782.1| acyl-CoA:diacylglycerol acyltransferase [Aspergillus oryzae 100-8]	0	1480
Novel00293	EQ963478	+	573–1377		gi|317147439|ref|XP_003189918.1| oxidoreductase, 2OG-Fe(II) oxygenase family [Aspergillus oryzae RIB40]&gt;gi|391873041|gb|EIT82116.1| oxidoreductase, 2OG-Fe(II) oxygenase family [Aspergillus oryzae 3.042]&gt;gi|635507698|gb|KDE79703.1| oxidoreductase, 2OG-Fe oxygenase family [Aspergillus oryzae 100-8]	0	1719
Novel00294	EQ963478	+	17365–19130
Novel00295	EQ963478	+	329207–330768
Novel00296	EQ963478	+	337117–338509		gi|666408443|gb|KEY73413.1| hypothetical protein S7711_06833 [Stachybotrys chartarum IBT 7711]	9.88137e-09	151
Novel00297	EQ963478	+	602267–603186
Novel00298	EQ963478	+	687969–689215
Novel00299	EQ963478	+	951798–953690		gi|169774727|ref|XP_001821831.1| MFS multidrug transporter [Aspergillus oryzae RIB40]&gt;gi|83769694|dbj|BAE59829.1| unnamed protein product [Aspergillus oryzae RIB40]&gt;gi|391868782|gb|EIT77991.1| synaptic vesicle transporter SVOP [Aspergillus oryzae 3.042]&gt;gi|635505402|gb|KDE77467.1| synaptic vesicle transporter SVOP [Aspergillus oryzae 100-8]	1.27021e-54	486
Novel00300	EQ963478	+	993081–995771
Novel00301	EQ963478	+	1247488–1248265		gi|317146998|ref|XP_003189876.1| hypothetical protein AOR_1_634014 [Aspergillus oryzae RIB40]	1.49592e-44	397
Novel00302	EQ963478	+	1303137–1303786
Novel00303	EQ963478	+	1320711–1322093
Novel00304	EQ963478	+	1376912–1377449
Novel00305	EQ963478	+	1422288–1422794
Novel00306	EQ963478	+	1511583–1512862
Novel00307	EQ963478	+	1595518–1595977
Novel00308	EQ963478	+	1759635–1764023
Novel00309	EQ963478	+	1837324–1839054		gi|134079081|emb|CAK48390.1| unnamed protein product [Aspergillus niger]	1.02712e-87	700
Novel00310	EQ963478	+	1912711–1913364		gi|317032797|ref|XP_001394400.2| hypothetical protein ANI_1_1912094 [Aspergillus niger CBS 513.88]	1.01221e-58	486
Novel00311	EQ963478	+	1985927–1986482		gi|391872188|gb|EIT81324.1| hypothetical protein Ao3042_02139 [Aspergillus oryzae 3.042]&gt;gi|635512179|gb|KDE84061.1| hypothetical protein AO1008_10686 [Aspergillus oryzae 100-8]	0	1261
Novel00312	EQ963478	+	1986610–1987138
Novel00313	EQ963478	+	2063587–2065411		gi|391874217|gb|EIT83139.1| serine/threonine protein kinase Chk2 [Aspergillus oryzae 3.042]	1.92259e-150	1156
Novel00314	EQ963478	-	19227–19995		gi|391874217|gb|EIT83139.1| serine/threonine protein kinase Chk2 [Aspergillus oryzae 3.042]	5.04684e-18	225
Novel00315	EQ963478	-	26160–28328
Novel00316	EQ963478	-	28425–29696
Novel00317	EQ963478	-	42612–46545
Novel00318	EQ963478	-	342980–344591
Novel00319	EQ963478	-	401311–403175		gi|317033688|ref|XP_001395320.2| hypothetical protein ANI_1_1512104 [Aspergillus niger CBS 513.88]	5.14991e-10	150
Novel00320	EQ963478	-	451145–452129
Novel00321	EQ963478	-	715300–715971		gi|557720655|dbj|GAE00293.1| predicted protein [Byssochlamys spectabilis No. 5]	3.57184e-18	148
Novel00322	EQ963478	-	993081–995771
Novel00323	EQ963478	-	1121221–1122273
Novel00324	EQ963478	-	1512045–1513192		gi|83769421|dbj|BAE59556.1| unnamed protein product [Aspergillus oryzae RIB40]&gt;gi|391872225|gb|EIT81361.1| hypothetical protein Ao3042_02158 [Aspergillus oryzae 3.042]&gt;gi|635512220|gb|KDE84102.1| hypothetical protein AO1008_10667 [Aspergillus oryzae 100-8]	2.79129e-15	200
Novel00325	EQ963478	-	1847925–1849798		gi|342875826|gb|EGU77530.1| hypothetical protein FOXB_11956 [Fusarium oxysporum Fo5176]	5.96472e-41	399
Novel00326	EQ963478	-	2116044–2117605
Novel00327	EQ963478	-	2295076–2297001
Novel00328	EQ963479	+	378548–379107		gi|682271573|gb|KFX95369.1| hypothetical protein V490_03902 [Pseudogymnoascus pannorum VKM F-3557]	2.10574e-30	323
Novel00329	EQ963479	+	538173–540005		gi|599156295|gb|EYE95456.1| hypothetical protein EURHEDRAFT_455836 [Aspergillus ruber CBS 135680]	1.55631e-21	240
Novel00330	EQ963479	+	858837–859833
Novel00331	EQ963479	+	870695–873435
Novel00332	EQ963479	+	914498–918133
Novel00333	EQ963479	+	1103915–1105613		gi|317155710|ref|XP_003190637.1| hypothetical protein AOR_1_636074 [Aspergillus oryzae RIB40]	7.1375e-91	741
Novel00334	EQ963479	+	1288864–1290548		gi|682440263|gb|KFZ03712.1| hypothetical protein V501_09320 [Pseudogymnoascus pannorum VKM F-4519 (FW-2642)]	1.62184e-72	614
Novel00335	EQ963479	+	1343687–1345998
Novel00336	EQ963479	+	1525859–1527424
Novel00337	EQ963479	+	2055277–2056869
Novel00338	EQ963479	+	2057161–2058741
Novel00339	EQ963479	-	427356–427840
Novel00340	EQ963479	-	538174–540005		gi|317155601|ref|XP_003190631.1| hypothetical protein AOR_1_478074 [Aspergillus oryzae RIB40]	2.80569e-09	147
Novel00341	EQ963479	-	754042–755757		gi|317155710|ref|XP_003190637.1| hypothetical protein AOR_1_636074 [Aspergillus oryzae RIB40]	2.17855e-95	772
Novel00342	EQ963479	-	1106139–1107307		gi|119471084|ref|XP_001258120.1| hypothetical protein NFIA_055720 [Neosartorya fischeri NRRL 181]&gt;gi|119406272|gb|EAW16223.1| hypothetical protein NFIA_055720 [Neosartorya fischeri NRRL 181]	9.23602e-08	132
Novel00343	EQ963479	-	1343687–1345998
Novel00344	EQ963479	-	1576972–1578090		gi|391868050|gb|EIT77273.1| hypothetical protein Ao3042_06521 [Aspergillus oryzae 3.042]&gt;gi|635510354|gb|KDE82290.1| hypothetical protein AO1008_08868 [Aspergillus oryzae 100-8]	0	1795
Novel00345	EQ963479	-	1657261–1657768		gi|317155954|ref|XP_003190666.1| cytochrome c oxidase assembly protein [Aspergillus oryzae RIB40]	5.49485e-31	288
Novel00346	EQ963479	-	1728361–1731074		gi|317150121|ref|XP_003190389.1| hypothetical protein AOR_1_64094 [Aspergillus oryzae RIB40]	4.23899e-113	802
Novel00347	EQ963479	-	1924820–1925446
Novel00348	EQ963480	+	342154–344003
Novel00349	EQ963480	+	473127–474935
Novel00350	EQ963480	+	537758–539813
Novel00351	EQ963480	+	629700–631609		gi|169779111|ref|XP_001824020.1| serine/threonine-protein kinase rio2 [Aspergillus oryzae RIB40]&gt;gi|83772759|dbj|BAE62887.1| unnamed protein product [Aspergillus oryzae RIB40]&gt;gi|391869329|gb|EIT78528.1| serine/threonine protein kinase [Aspergillus oryzae 3.042]&gt;gi|635511184|gb|KDE83095.1| serine/threonine protein [Aspergillus oryzae 100-8]	0	1739
Novel00352	EQ963480	+	976460–977653
Novel00353	EQ963480	+	1034796–1035335		gi|134081974|emb|CAK46659.1| hypothetical protein An14g06660 [Aspergillus niger]	7.06101e-06	130
Novel00354	EQ963480	+	1225283–1228998		gi|317150551|ref|XP_003190433.1| hypothetical protein AOR_1_696094 [Aspergillus oryzae RIB40]	0	3981
Novel00355	EQ963480	+	1271062–1273903		gi|317033825|ref|XP_001395523.2| hypothetical protein ANI_1_1778104 [Aspergillus niger CBS 513.88]	9.22377e-66	398
Novel00356	EQ963480	+	1296172–1298412
Novel00357	EQ963480	+	1313074–1316557
Novel00358	EQ963480	+	1321410–1323773		gi|599154620|gb|EYE93856.1| NAD(P)-binding protein [Aspergillus ruber CBS 135680]	4.57307e-19	191
Novel00359	EQ963480	+	1463582–1466093
Novel00360	EQ963480	+	1551217–1552480
Novel00361	EQ963480	+	1588695–1589969
Novel00362	EQ963480	+	1814567–1815411
Novel00363	EQ963480	+	1901385–1901956		gi|391872077|gb|EIT81220.1| hypothetical protein Ao3042_02306 [Aspergillus oryzae 3.042]&gt;gi|635514114|gb|KDE85880.1| hypothetical protein AO1008_02910 [Aspergillus oryzae 100-8]	9.11406e-54	481
Novel00364	EQ963480	-	137621–139083		gi|317149976|ref|XP_003190380.1| hypothetical protein AOR_1_34104 [Aspergillus oryzae RIB40]	8.30461e-22	228
Novel00365	EQ963480	-	197444–198169		gi|317149952|ref|XP_001823688.2| 3-oxoacyl-(acyl-carrier-protein) reductase 2 [Aspergillus oryzae RIB40]	3.50421e-88	706
Novel00366	EQ963480	-	245998–247244
Novel00367	EQ963480	-	535243–536480
Novel00368	EQ963480	-	537961–539813		gi|115386698|ref|XP_001209890.1| predicted protein [Aspergillus terreus NIH2624]&gt;gi|114190888|gb|EAU32588.1| predicted protein [Aspergillus terreus NIH2624]	6.02381e-26	283
Novel00369	EQ963480	-	572361–573658
Novel00370	EQ963480	-	604129–606780		gi|83772645|dbj|BAE62773.1| unnamed protein product [Aspergillus oryzae RIB40]&gt;gi|391873455|gb|EIT82485.1| structural maintenance of chromosome protein SMC5/Spr18, SMC superfamily [Aspergillus oryzae 3.042]&gt;gi|635503531|gb|KDE75659.1| structural maintenance of chromosome protein [Aspergillus oryzae 100-8]	0	1833
Novel00371	EQ963480	-	640468–644576
Novel00372	EQ963480	-	836462–837376
Novel00373	EQ963480	-	1137460–1140080
Novel00374	EQ963480	-	1212913–1214403		gi|134081974|emb|CAK46659.1| hypothetical protein An14g06660 [Aspergillus niger]	5.87601e-06	130
Novel00375	EQ963480	-	1225443–1229028		gi|317033825|ref|XP_001395523.2| hypothetical protein ANI_1_1778104 [Aspergillus niger CBS 513.88]	1.31292e-35	367
Novel00376	EQ963480	-	1295181–1297236
Novel00377	EQ963480	-	1313074–1316557		gi|317150620|ref|XP_001824170.2| inositol hexaphosphate kinase KCS1 [Aspergillus oryzae RIB40]	3.61481e-87	762
Novel00378	EQ963480	-	1446166–1447702		gi|628325298|ref|XP_007737621.1| hypothetical protein A1O3_09337 [Capronia epimyces CBS 606.96]&gt;gi|590002959|gb|EXJ78176.1| hypothetical protein A1O3_09337 [Capronia epimyces CBS 606.96]	7.74465e-09	153
Novel00379	EQ963480	-	1463582–1466966		gi|599150308|gb|EYE89913.1| hypothetical protein EURHEDRAFT_417969, partial [Aspergillus ruber CBS 135680]	4.48602e-28	287
Novel00380	EQ963480	-	1549759–1550417
Novel00381	EQ963480	-	1798078–1798735		gi|317156291|ref|XP_003190705.1| hypothetical protein AOR_1_288064 [Aspergillus oryzae RIB40]	1.01106e-55	453
Novel00382	EQ963481	+	351900–352480
Novel00383	EQ963481	+	566734–568339		gi|238494726|ref|XP_002378599.1| conserved hypothetical protein [Aspergillus flavus NRRL3357]&gt;gi|317149248|ref|XP_003190292.1| hypothetical protein AOR_1_718114 [Aspergillus oryzae RIB40]&gt;gi|220695249|gb|EED51592.1| conserved hypothetical protein [Aspergillus flavus NRRL3357]	3.8314e-28	294
Novel00384	EQ963481	+	637052–638739		gi|317155432|ref|XP_003190607.1| hypothetical protein AOR_1_196074 [Aspergillus oryzae RIB40]	4.32594e-55	452
Novel00385	EQ963481	+	706626–707312		gi|358388912|gb|EHK26505.1| hypothetical protein TRIVIDRAFT_70489 [Trichoderma virens Gv29-8]	1.66413e-09	107
Novel00386	EQ963481	+	793109–794285		gi|169781334|ref|XP_001825130.1| ATP-binding cassette transporter [Aspergillus oryzae RIB40]&gt;gi|83773872|dbj|BAE63997.1| unnamed protein product [Aspergillus oryzae RIB40]	1.65839e-94	785
Novel00387	EQ963481	+	796840–797421		gi|391863979|gb|EIT73278.1| peroxisomal multifunctional beta-oxidation protein [Aspergillus oryzae 3.042]&gt;gi|635510904|gb|KDE82826.1| peroxisomal multifunctional beta-oxidation protein [Aspergillus oryzae 100-8]	0	1411
Novel00388	EQ963481	+	1105090–1106201
Novel00389	EQ963481	+	1273029–1276881
Novel00390	EQ963481	+	1288043–1289625
Novel00391	EQ963481	+	1434730–1435438
Novel00392	EQ963481	+	1612471–1613934		gi|391863882|gb|EIT73181.1| glutaminase [Aspergillus oryzae 3.042]&gt;gi|635510279|gb|KDE82220.1| glutaminase [Aspergillus oryzae 100-8]	0	2142
Novel00393	EQ963481	+	1653418–1655079
Novel00394	EQ963481	+	1715883–1718108		gi|391863953|gb|EIT73252.1| alpha-glucosidase [Aspergillus oryzae 3.042]&gt;gi|635512496|gb|KDE84370.1| alpha-glucosidase, family 31 of glycosyl hydrolase [Aspergillus oryzae 100-8]	0	2889
Novel00395	EQ963481	+	1729835–1732275		gi|391866993|gb|EIT76258.1| adenosine deaminase [Aspergillus oryzae 3.042]&gt;gi|635511034|gb|KDE82952.1| cytosine/adenosine deaminase [Aspergillus oryzae 100-8]	3.36297e-114	849
Novel00396	EQ963481	-	28550–29175		gi|317156133|ref|XP_003190682.1| hypothetical protein AOR_1_2064 [Aspergillus oryzae RIB40]	6.65025e-42	394
Novel00397	EQ963481	-	49713–51791		gi|630018502|ref|XP_007833090.1| hypothetical protein PFICI_06318 [Pestalotiopsis fici W106-1]&gt;gi|573061608|gb|ETS81316.1| hypothetical protein PFICI_06318 [Pestalotiopsis fici W106-1]	4.29117e-29	295
Novel00398	EQ963481	-	424229–424989
Novel00399	EQ963481	-	464114–465005		gi|587656982|gb|EWY79387.1| hypothetical protein FOYG_17435 [Fusarium oxysporum FOSC 3-a]	4.20381e-66	608
Novel00400	EQ963481	-	505430–508682		gi|121710814|ref|XP_001273023.1| hypothetical protein ACLA_092950 [Aspergillus clavatus NRRL 1]&gt;gi|119401173|gb|EAW11597.1| hypothetical protein ACLA_092950 [Aspergillus clavatus NRRL 1]	5.41375e-32	319
Novel00401	EQ963481	-	563411–565251
Novel00402	EQ963481	-	566734–568339		gi|67526045|ref|XP_661084.1| hypothetical protein AN3480.2 [Aspergillus nidulans FGSC A4]&gt;gi|40739851|gb|EAA59041.1| hypothetical protein AN3480.2 [Aspergillus nidulans FGSC A4]&gt;gi|259482008|tpe|CBF76068.1| TPA: conserved hypothetical protein [Aspergillus nidulans FGSC A4]	2.18769e-51	470
Novel00403	EQ963481	-	579638–582983
Novel00404	EQ963481	-	783443–784842
Novel00405	EQ963481	-	884284–885005
Novel00406	EQ963481	-	1273029–1278142		gi|391863960|gb|EIT73259.1| hypothetical protein Ao3042_10949 [Aspergillus oryzae 3.042]&gt;gi|635502826|gb|KDE75000.1| hypothetical protein AO1008_00634 [Aspergillus oryzae 100-8]	5.27728e-103	799
Novel00407	EQ963481	-	1560605–1561828
Novel00408	EQ963481	-	1641000–1641803		gi|83767007|dbj|BAE57147.1| unnamed protein product [Aspergillus oryzae RIB40]	6.42822e-55	503
Novel00409	EQ963481	-	1732372–1733409
Novel00410	EQ963481	-	1822606–1826628
Novel00411	EQ963481	-	1830146–1831575
Novel00412	EQ963481	-	1912707–1915852		gi|317142968|ref|XP_003189460.1| fungal specific transcription factor [Aspergillus oryzae RIB40]	0	2070
Novel00413	EQ963481	-	1956461–1959506		gi|169769542|ref|XP_001819241.1| replication factor A protein 1 [Aspergillus oryzae RIB40]&gt;gi|83767099|dbj|BAE57239.1| unnamed protein product [Aspergillus oryzae RIB40]&gt;gi|391863708|gb|EIT73008.1| single-stranded DNA-binding replication protein A [Aspergillus oryzae 3.042]&gt;gi|635513719|gb|KDE85510.1| single-stranded DNA-binding replication protein [Aspergillus oryzae 100-8]	6.53139e-25	266
Novel00414	EQ963481	-	2007817–2008420
Novel00415	EQ963482	+	369405–371794		gi|317147984|ref|XP_003190137.1| hypothetical protein AOR_1_358134 [Aspergillus oryzae RIB40]	0	2007
Novel00416	EQ963482	+	729334–731708		gi|317148012|ref|XP_003190142.1| hypothetical protein AOR_1_394134 [Aspergillus oryzae RIB40]	1.42195e-84	687
Novel00417	EQ963482	+	796645–798268
Novel00418	EQ963482	+	849972–850755		gi|317148053|ref|XP_003190147.1| hypothetical protein AOR_1_450134 [Aspergillus oryzae RIB40]	2.91649e-93	734
Novel00419	EQ963482	+	876009–876865
Novel00420	EQ963482	+	902163–903645		gi|67540406|ref|XP_663977.1| hypothetical protein AN6373.2 [Aspergillus nidulans FGSC A4]&gt;gi|40739567|gb|EAA58757.1| hypothetical protein AN6373.2 [Aspergillus nidulans FGSC A4]&gt;gi|259479408|tpe|CBF69602.1| TPA: conserved hypothetical protein [Aspergillus nidulans FGSC A4]	7.67095e-24	263
Novel00421	EQ963482	+	1322778–1323318
Novel00422	EQ963482	+	1437860–1438957		gi|317148388|ref|XP_003190186.1| hypothetical protein AOR_1_980134 [Aspergillus oryzae RIB40]	0	2892
Novel00423	EQ963482	+	1547559–1548447		gi|317148406|ref|XP_003190190.1| hypothetical protein AOR_1_1004134 [Aspergillus oryzae RIB40]	9.11082e-53	447
Novel00424	EQ963482	+	1779364–1782159		gi|350640278|gb|EHA28631.1| hypothetical protein ASPNIDRAFT_188343 [Aspergillus niger ATCC 1015]	3.96539e-60	490
Novel00425	EQ963482	+	1810208–1811704		gi|317147819|ref|XP_001822307.2| amino acid transporter [Aspergillus oryzae RIB40]	3.69373e-60	508
Novel00426	EQ963482	+	1941742–1942451
Novel00427	EQ963482	-	378118–378592
Novel00428	EQ963482	-	468473–470345		gi|169775831|ref|XP_001822382.1| 60S ribosomal export protein NMD3 [Aspergillus oryzae RIB40]&gt;gi|83771117|dbj|BAE61249.1| unnamed protein product [Aspergillus oryzae RIB40]&gt;gi|391871083|gb|EIT80249.1| NMD protein affecting ribosome stability and mRNA decay [Aspergillus oryzae 3.042]&gt;gi|635506699|gb|KDE78733.1| NMD protein [Aspergillus oryzae 100-8]	2.88636e-146	1120
Novel00429	EQ963482	-	537842–538649		gi|391871081|gb|EIT80247.1| C6 finger domain protein [Aspergillus oryzae 3.042]&gt;gi|635506810|gb|KDE78844.1| C6 finger domain protein [Aspergillus oryzae 100-8]	0	1397
Novel00430	EQ963482	-	602394–603784		gi|317148012|ref|XP_003190142.1| hypothetical protein AOR_1_394134 [Aspergillus oryzae RIB40]	2.22474e-86	685
Novel00431	EQ963482	-	677505–679321
Novel00432	EQ963482	-	796964–798280
Novel00433	EQ963482	-	832652–833683
Novel00434	EQ963482	-	846828–849043		gi|317148112|ref|XP_003190158.1| C6 transcription factor (Acr-2) [Aspergillus oryzae RIB40]	2.44188e-162	1245
Novel00435	EQ963482	-	849972–850683
Novel00436	EQ963482	-	1027288–1029256		gi|119481659|ref|XP_001260858.1| hypothetical protein NFIA_089180 [Neosartorya fischeri NRRL 181]&gt;gi|119409012|gb|EAW18961.1| conserved hypothetical protein [Neosartorya fischeri NRRL 181]	6.2775e-16	195
Novel00437	EQ963482	-	1165576–1166219		gi|83771380|dbj|BAE61512.1| unnamed protein product [Aspergillus oryzae RIB40]	1.62199e-19	240
Novel00438	EQ963482	-	1438143–1438957		gi|317148259|ref|XP_001822650.2| fungal specific transcription factor domain protein [Aspergillus oryzae RIB40]	1.09944e-115	833
Novel00439	EQ963482	-	1477828–1480306
Novel00440	EQ963482	-	1495510–1496782		gi|317138739|ref|XP_003189078.1| hypothetical protein AOR_1_1168184 [Aspergillus oryzae RIB40]	1.15535e-90	731
Novel00441	EQ963482	-	1622629–1624689
Novel00442	EQ963483	+	59333–60915
Novel00443	EQ963483	+	895264–897656
Novel00444	EQ963483	+	1058549–1060982		gi|169764477|ref|XP_001816710.1| oxidoreductase, short-chain dehydrogenase/reductase family [Aspergillus oryzae RIB40]&gt;gi|83764564|dbj|BAE54708.1| unnamed protein product [Aspergillus oryzae RIB40]&gt;gi|391870040|gb|EIT79228.1| dehydrogenase with different specificitie [Aspergillus oryzae 3.042]&gt;gi|635511917|gb|KDE83809.1| dehydrogenase [Aspergillus oryzae 100-8]	0	1379
Novel00445	EQ963483	+	1284379–1284985		gi|317138079|ref|XP_003189010.1| hypothetical protein AOR_1_256184 [Aspergillus oryzae RIB40]	3.03924e-24	253
Novel00446	EQ963483	+	1287212–1288349		gi|83764510|dbj|BAE54654.1| unnamed protein product [Aspergillus oryzae RIB40]&gt;gi|391870015|gb|EIT79203.1| hypothetical protein Ao3042_04312 [Aspergillus oryzae 3.042]&gt;gi|635511855|gb|KDE83747.1| hypothetical protein AO1008_10301 [Aspergillus oryzae 100-8]	2.09661e-104	811
Novel00447	EQ963483	+	1471106–1472342
Novel00448	EQ963483	+	1472489–1473875		gi|317137935|ref|XP_003188992.1| hypothetical protein AOR_1_30184 [Aspergillus oryzae RIB40]	4.42408e-14	174
Novel00449	EQ963483	+	1685299–1685793		gi|119498543|ref|XP_001266029.1| ribosomal protein L39, putative [Neosartorya fischeri NRRL 181]&gt;gi|119414193|gb|EAW24132.1| ribosomal protein L39, putative [Neosartorya fischeri NRRL 181]	5.83617e-14	173
Novel00450	EQ963483	+	1825267–1825921
Novel00451	EQ963483	-	168202–169272
Novel00452	EQ963483	-	308247–308719		gi|317138608|ref|XP_001817032.2| 2-dehydropantoate 2-reductase family protein [Aspergillus oryzae RIB40]	1.77917e-06	137
Novel00453	EQ963483	-	308967–310850
Novel00454	EQ963483	-	310901–313160		gi|169764989|ref|XP_001816966.1| hypothetical protein AOR_1_856184 [Aspergillus oryzae RIB40]&gt;gi|83764820|dbj|BAE54964.1| unnamed protein product [Aspergillus oryzae RIB40]&gt;gi|391863435|gb|EIT72746.1| hypothetical protein Ao3042_01151 [Aspergillus oryzae 3.042]&gt;gi|635505382|gb|KDE77447.1| hypothetical protein AO1008_03594 [Aspergillus oryzae 100-8]	1.44531e-79	655
Novel00455	EQ963483	-	332231–333215
Novel00456	EQ963483	-	496535–497529		gi|317138460|ref|XP_003189043.1| hypothetical protein AOR_1_762184 [Aspergillus oryzae RIB40]	1.61679e-146	1109
Novel00457	EQ963483	-	580264–580844		gi|391863351|gb|EIT72662.1| putative alpha-helical protein, potentially involved in replication/repair [Aspergillus oryzae 3.042]&gt;gi|635505320|gb|KDE77385.1| putative alpha-helical protein, potentially involved in replication/repair [Aspergillus oryzae 100-8]	1.50665e-123	930
Novel00458	EQ963483	-	665185–666935
Novel00459	EQ963483	-	693509–694674
Novel00460	EQ963483	-	701031–702307
Novel00461	EQ963483	-	841026–845656
Novel00462	EQ963483	-	895264–897656		gi|391863181|gb|EIT72493.1| hypothetical protein Ao3042_00998 [Aspergillus oryzae 3.042]&gt;gi|635512096|gb|KDE83982.1| hypothetical protein AO1008_10536 [Aspergillus oryzae 100-8]	4.44004e-132	1056
Novel00463	EQ963483	-	901398–901677		gi|391863203|gb|EIT72515.1| hypothetical protein Ao3042_00997 [Aspergillus oryzae 3.042]&gt;gi|635512087|gb|KDE83973.1| hypothetical protein AO1008_10535 [Aspergillus oryzae 100-8]	5.87575e-17	220
Novel00464	EQ963483	-	982073–984724
Novel00465	EQ963483	-	988041–989325		gi|83764640|dbj|BAE54784.1| unnamed protein product [Aspergillus oryzae RIB40]&gt;gi|391863476|gb|EIT72785.1| hypothetical protein Ao3042_00970 [Aspergillus oryzae 3.042]&gt;gi|635511967|gb|KDE83859.1| hypothetical protein AO1008_10433 [Aspergillus oryzae 100-8]	3.47791e-82	686
Novel00466	EQ963483	-	1058549–1061009		gi|317138174|ref|XP_003189021.1| hypothetical protein AOR_1_392184 [Aspergillus oryzae RIB40]	5.3483e-41	367
Novel00467	EQ963483	-	1063949–1065640
Novel00468	EQ963483	-	1240329–1240645
Novel00469	EQ963483	-	1244701–1246458		gi|317138823|ref|XP_001816624.2| CPA2 familytransporter [Aspergillus oryzae RIB40]	9.97969e-32	186
Novel00470	EQ963483	-	1361146–1362329
Novel00471	EQ963483	-	1583836–1585183
Novel00472	EQ963483	-	1651998–1653511
Novel00473	EQ963483	-	1740126–1741471		gi|317137935|ref|XP_003188992.1| hypothetical protein AOR_1_30184 [Aspergillus oryzae RIB40]	2.2512e-08	133
Novel00474	EQ963483	-	1760039–1761638		gi|83773726|dbj|BAE63853.1| unnamed protein product [Aspergillus oryzae RIB40]	1.6996e-96	509
Novel00475	EQ963483	-	1825197–1825921
Novel00476	EQ963484	+	27393–28119		gi|169780978|ref|XP_001824953.1| D-xylulose reductase A [Aspergillus oryzae RIB40]&gt;gi|83773693|dbj|BAE63820.1| unnamed protein product [Aspergillus oryzae RIB40]&gt;gi|391867200|gb|EIT76450.1| sorbitol dehydrogenase [Aspergillus oryzae 3.042]&gt;gi|635513531|gb|KDE85335.1| sorbitol dehydrogenase [Aspergillus oryzae 100-8]	0	1773
Novel00477	EQ963484	+	56836–60092
Novel00478	EQ963484	+	114639–117169		gi|680000557|gb|KFX52659.1| Nitrogen assimilation transcription factor nirA [Talaromyces marneffei PM1]	1.05583e-11	179
Novel00479	EQ963484	+	166603–167688		gi|317155092|ref|XP_003190556.1| C2H2 type zinc finger domain protein [Aspergillus oryzae RIB40]	5.28126e-16	196
Novel00480	EQ963484	+	236851–238327
Novel00481	EQ963484	+	240233–241068		gi|682298811|gb|KFY11730.1| hypothetical protein V491_07084 [Pseudogymnoascus pannorum VKM F-3775]	7.90158e-96	594
Novel00482	EQ963484	+	313980–315760		gi|317151594|ref|XP_001824768.2| woronin body major protein [Aspergillus oryzae RIB40]	2.19812e-11	178
Novel00483	EQ963484	+	388417–390851
Novel00484	EQ963484	+	657092–659394
Novel00485	EQ963484	+	700579–702971
Novel00486	EQ963484	+	703036–706682
Novel00487	EQ963484	+	720544–721453
Novel00488	EQ963484	+	804736–807119		gi|391863069|gb|EIT72383.1| hypothetical protein Ao3042_01353 [Aspergillus oryzae 3.042]&gt;gi|635503011|gb|KDE75155.1| hypothetical protein AO1008_11532 [Aspergillus oryzae 100-8]	7.50098e-124	952
Novel00489	EQ963484	+	933403–934504
Novel00490	EQ963484	+	993112–995654
Novel00491	EQ963484	+	1059470–1060061
Novel00492	EQ963484	+	1161834–1163017		gi|317151131|ref|XP_003190485.1| hypothetical protein AOR_1_164084 [Aspergillus oryzae RIB40]	0	1708
Novel00493	EQ963484	+	1326913–1327836
Novel00494	EQ963484	+	1550200–1552144		gi|317155217|ref|XP_001824397.2| DNA repair protein Rad18 [Aspergillus oryzae RIB40]	0	2044
Novel00495	EQ963484	+	1590815–1591278		gi|169780978|ref|XP_001824953.1| D-xylulose reductase A [Aspergillus oryzae RIB40]&gt;gi|83773693|dbj|BAE63820.1| unnamed protein product [Aspergillus oryzae RIB40]&gt;gi|391867200|gb|EIT76450.1| sorbitol dehydrogenase [Aspergillus oryzae 3.042]&gt;gi|635513531|gb|KDE85335.1| sorbitol dehydrogenase [Aspergillus oryzae 100-8]	0	1525
Novel00496	EQ963484	+	1772400–1774034
Novel00497	EQ963484	-	114805–117202
Novel00498	EQ963484	-	193400–194417		gi|296816118|ref|XP_002848396.1| conserved hypothetical protein [Arthroderma otae CBS 113480]&gt;gi|238841421|gb|EEQ31083.1| conserved hypothetical protein [Arthroderma otae CBS 113480]	5.80485e-18	222
Novel00499	EQ963484	-	237339–238655		gi|682298811|gb|KFY11730.1| hypothetical protein V491_07084 [Pseudogymnoascus pannorum VKM F-3775]	4.91435e-91	496
Novel00500	EQ963484	-	268365–269375		gi|391867205|gb|EIT76455.1| lysosomal trafficking regulator [Aspergillus oryzae 3.042]&gt;gi|635513666|gb|KDE85466.1| lysosomal trafficking regulator LYST [Aspergillus oryzae 100-8]	0	4262
Novel00501	EQ963484	-	388417–390851		gi|317151652|ref|XP_003190547.1| hypothetical protein AOR_1_886084 [Aspergillus oryzae RIB40]	0	1404
Novel00502	EQ963484	-	478445–487499
Novel00503	EQ963484	-	512036–513643
Novel00504	EQ963484	-	608173–611608
Novel00505	EQ963484	-	989304–992800
Novel00506	EQ963484	-	1073355–1074047
Novel00507	EQ963484	-	1336642–1339286
Novel00508	EQ963484	-	1410872–1411607
Novel00509	EQ963484	-	1438333–1440107		gi|317158843|ref|XP_001827351.2| hypothetical protein AOR_1_556024 [Aspergillus oryzae RIB40]	0	1722
Novel00510	EQ963485	+	546249–546955		gi|238506811|ref|XP_002384607.1| O-methyltransferase, putative [Aspergillus flavus NRRL3357]&gt;gi|220689320|gb|EED45671.1| O-methyltransferase, putative [Aspergillus flavus NRRL3357]	2.53161e-20	230
Novel00511	EQ963485	+	685757–686715		gi|169786015|ref|XP_001827468.1| rhamnogalacturonase B [Aspergillus oryzae RIB40]&gt;gi|121927955|sp|Q2TWN8.1|RHGB_ASPOR RecName: Full=Probable rhamnogalacturonase B; Short=RGase B; Short=RHG B; Flags: Precursor [Aspergillus oryzae RIB40]&gt;gi|83776216|dbj|BAE66335.1| unnamed protein product [Aspergillus oryzae RIB40]&gt;gi|391866462|gb|EIT75734.1| rhamnogalacturonase B [Aspergillus oryzae 3.042…	2.02875e-130	1003
Novel00512	EQ963485	+	870167–870733
Novel00513	EQ963485	+	1047170–1048142		gi|119499295|ref|XP_001266405.1| fungal specific transcription factor, putative [Neosartorya fischeri NRRL 181]&gt;gi|119414569|gb|EAW24508.1| fungal specific transcription factor, putative [Neosartorya fischeri NRRL 181]	2.00248e-08	141
Novel00514	EQ963485	+	1106216–1108235		gi|317159295|ref|XP_001827689.2| hypothetical protein AOR_1_1246024 [Aspergillus oryzae RIB40]	4.11356e-84	713
Novel00515	EQ963485	+	1404276–1404933		gi|317159529|ref|XP_003191086.1| hypothetical protein AOR_1_1602024 [Aspergillus oryzae RIB40]	0	2515
Novel00516	EQ963485	+	1666640–1668408		gi|317158698|ref|XP_003190997.1| hypothetical protein AOR_1_252024 [Aspergillus oryzae RIB40]	2.54575e-13	153
Novel00517	EQ963485	+	1791040–1793265
Novel00518	EQ963485	-	380813–381484
Novel00519	EQ963485	-	555177–557174		gi|666863901|gb|KEZ40608.1| hypothetical protein SAPIO_CDS8524 [Scedosporium apiospermum]	6.82999e-19	212
Novel00520	EQ963485	-	612202–613584		gi|317158870|ref|XP_003191017.1| hypothetical protein AOR_1_592024 [Aspergillus oryzae RIB40]	2.48246e-161	1195
Novel00521	EQ963485	-	729462–730436
Novel00522	EQ963485	-	730976–732396
Novel00523	EQ963485	-	1110087–1110515
Novel00524	EQ963485	-	1131393–1132229
Novel00525	EQ963485	-	1150889–1152234		gi|599154567|gb|EYE93803.1| hypothetical protein EURHEDRAFT_378794 [Aspergillus ruber CBS 135680]	6.58429e-58	510
Novel00526	EQ963485	-	1469197–1470020		gi|317159529|ref|XP_003191086.1| hypothetical protein AOR_1_1602024 [Aspergillus oryzae RIB40]	0	2680
Novel00527	EQ963485	-	1769106–1770764
Novel00528	EQ963485	-	1791040–1793265		gi|83775693|dbj|BAE65813.1| unnamed protein product [Aspergillus oryzae RIB40]	1.0742e-55	470
Novel00529	EQ963486	+	56449–57670		gi|317157864|ref|XP_003190896.1| hypothetical protein AOR_1_34 [Aspergillus oryzae RIB40]&gt;gi|391874339|gb|EIT83237.1| hypothetical protein Ao3042_13016 [Aspergillus oryzae 3.042]	3.27435e-154	1131
Novel00530	EQ963486	+	275958–276733		gi|317158382|ref|XP_003190959.1| hypothetical protein AOR_1_822034 [Aspergillus oryzae RIB40]	1.37294e-40	366
Novel00531	EQ963486	+	1294710–1295697		gi|317158368|ref|XP_003190958.1| hypothetical protein AOR_1_802034 [Aspergillus oryzae RIB40]	4.93521e-104	871
Novel00532	EQ963486	-	16407–17254		gi|238505787|ref|XP_002384099.1| RING finger protein [Aspergillus flavus NRRL3357]&gt;gi|83773278|dbj|BAE63405.1| unnamed protein product [Aspergillus oryzae RIB40]&gt;gi|220690213|gb|EED46563.1| RING finger protein [Aspergillus flavus NRRL3357]&gt;gi|391868689|gb|EIT77899.1| RING finger protein [Aspergillus oryzae 3.042]&gt;gi|635507597|gb|KDE79607.1| RING finger protein [Aspergillus oryzae 100-…	7.03347e-13	170
Novel00533	EQ963486	-	37496–40180		gi|317158273|ref|XP_001826964.2| C6 transcription factor [Aspergillus oryzae RIB40]	9.23741e-81	648
Novel00534	EQ963486	-	100652–101457
Novel00535	EQ963486	-	239315–240096		gi|317158170|ref|XP_003190934.1| hypothetical protein AOR_1_496034 [Aspergillus oryzae RIB40]	3.68783e-18	198
Novel00536	EQ963486	-	321315–322062		gi|317158079|ref|XP_003190919.1| hypothetical protein AOR_1_354034 [Aspergillus oryzae RIB40]	4.08414e-146	1123
Novel00537	EQ963486	-	494711–495327		gi|317158079|ref|XP_003190919.1| hypothetical protein AOR_1_354034 [Aspergillus oryzae RIB40]	1.14849e-143	1087
Novel00538	EQ963486	-	726996–728571		gi|685856831|ref|XP_009255448.1| hypothetical protein FPSE_04055 [Fusarium pseudograminearum CS3096]&gt;gi|408396720|gb|EKJ75875.1| hypothetical protein FPSE_04055 [Fusarium pseudograminearum CS3096]	5.06481e-09	154
Novel00539	EQ963486	-	728684–729682		gi|599156775|gb|EYE95907.1| hypothetical protein EURHEDRAFT_454557 [Aspergillus ruber CBS 135680]	1.23393e-28	273
Novel00540	EQ963486	-	966091–967110
Novel00541	EQ963486	-	1271735–1272443
Novel00542	EQ963487	+	290102–291080		gi|169786215|ref|XP_001827568.1| hypothetical protein AOR_1_1548024 [Aspergillus oryzae RIB40]&gt;gi|83776316|dbj|BAE66435.1| unnamed protein product [Aspergillus oryzae RIB40]&gt;gi|391866247|gb|EIT75519.1| hypothetical protein Ao3042_08261 [Aspergillus oryzae 3.042]&gt;gi|635514418|gb|KDE86167.1| hypothetical protein AO1008_03723 [Aspergillus oryzae 100-8]	6.52899e-45	410
Novel00543	EQ963487	-	260747–262314		gi|317145276|ref|XP_001820645.2| endoglucanase [Aspergillus oryzae RIB40]&gt;gi|391865502|gb|EIT74782.1| hypothetical protein Ao3042_08664 [Aspergillus oryzae 3.042]&gt;gi|635514223|gb|KDE85984.1| hypothetical protein AO1008_04292 [Aspergillus oryzae 100-8]	3.54392e-152	1174
Novel00544	EQ963490	-	6564–7720		gi|121804485|sp|Q2UMM2.1|ACUK_ASPOR RecName: Full=Transcription activator of gluconeogenesis acuK [Aspergillus oryzae RIB40]&gt;gi|83767053|dbj|BAE57193.1| unnamed protein product [Aspergillus oryzae RIB40]	0	3140
Novel00545	EQ963491	-	139–2466		gi|317148035|ref|XP_001822456.2| COP9 signalosome complex subunit 5 [Aspergillus oryzae RIB40]	0	1747
Novel00546	EQ963492	-	1370–6402		gi|317148033|ref|XP_003190146.1| microtubule associated protein (Ase1) [Aspergillus oryzae RIB40]	1.05783e-123	688
Novel00547	EQ963498	+	1–2870		gi|317148035|ref|XP_001822456.2| COP9 signalosome complex subunit 5 [Aspergillus oryzae RIB40]	0	1747
Novel00548	EQ963498	+	3262–4572		gi|83768808|dbj|BAE58945.1| unnamed protein product [Aspergillus oryzae RIB40]	5.41867e-149	1101
Novel00549	EQ963498	-	12–3291		gi|169772955|ref|XP_001820946.1| aspergillopepsin-2 heavy chain [Aspergillus oryzae RIB40]&gt;gi|83768807|dbj|BAE58944.1| unnamed protein product [Aspergillus oryzae RIB40]	4.62254e-145	1086
Novel00550	EQ963499	+	1–886		gi|317157432|ref|XP_001826466.2| translational activator GCN1 [Aspergillus oryzae RIB40]	0	2802
Novel00551	EQ963499	+	2912–4234		gi|317157432|ref|XP_001826466.2| translational activator GCN1 [Aspergillus oryzae RIB40]	0	2689
Novel00552	EQ963502	+	19–3952		gi|212546131|ref|XP_002153219.1| DNA-directed RNA polymerases N/8 kDa subunit superfamily [Talaromyces marneffei ATCC 18224]&gt;gi|210064739|gb|EEA18834.1| DNA-directed RNA polymerases N/8 kDa subunit superfamily [Talaromyces marneffei ATCC 18224]&gt;gi|679991578|gb|KFX44335.1| DNA-directed RNA polymerases I, II, and III subunit RPABC5 [Talaromyces marneffei PM1]	6.61244e-08	125
Novel00553	EQ963502	-	17–3964		gi|391862995|gb|EIT72310.1| WD domain protein [Aspergillus oryzae 3.042]&gt;gi|635513426|gb|KDE85240.1| hypothetical protein AO1008_00605 [Aspergillus oryzae 100-8]	0	2633
Novel00554	EQ963511	+	3092–3491		gi|169767460|ref|XP_001818201.1| hypothetical protein AOR_1_2168174 [Aspergillus oryzae RIB40]&gt;gi|83766056|dbj|BAE56199.1| unnamed protein product [Aspergillus oryzae RIB40]&gt;gi|391871949|gb|EIT81098.1| protein tyrosine phosphatase-like protein PTPLA [Aspergillus oryzae 3.042]&gt;gi|635509098|gb|KDE81070.1| hypothetical protein AO1008_07563 [Aspergillus oryzae 100-8]	1.49809e-39	368
Novel00555	EQ963511	-	1–3025		gi|317142547|ref|XP_001818940.2| small nucleolar ribonucleoprotein complex subunit (SOF1) [Aspergillus oryzae RIB40]	0	1924
Novel00556	EQ963521	-	1334–2547		gi|83766798|dbj|BAE56938.1| unnamed protein product [Aspergillus oryzae RIB40]&gt;gi|391863900|gb|EIT73199.1| Sof1-like rRNA processing protein [Aspergillus oryzae 3.042]&gt;gi|635510937|gb|KDE82859.1| Sof1-like rRNA processing protein [Aspergillus oryzae 100-8]	0	1719
Novel00557	EQ963522	+	1–2910		gi|317148211|ref|XP_003190168.1| hypothetical protein AOR_1_678134 [Aspergillus oryzae RIB40]	5.39279e-60	398
Novel00558	EQ963522	-	2–2910		gi|317158514|ref|XP_001826977.2| NF-X1 finger and helicase domain protein [Aspergillus oryzae RIB40]	0	2871
Novel00559	EQ963524	+	74–2338		gi|83771375|dbj|BAE61507.1| unnamed protein product [Aspergillus oryzae RIB40]	4.91146e-59	505
Novel00560	EQ963541	-	5–2604		gi|83771373|dbj|BAE61505.1| unnamed protein product [Aspergillus oryzae RIB40]	3.4046e-49	414
Novel00561	EQ963566	+	5–647		gi|317143086|ref|XP_001819067.2| beta-mannosidase A [Aspergillus oryzae RIB40]	8.41463e-62	557
Novel00562	EQ963613	-	1–462		gi|317140702|ref|XP_001818364.2| syntaxin [Aspergillus oryzae RIB40]	4.02639e-133	1031
Novel00563	EQ963677	-	94–1251		gi|169783782|ref|XP_001826353.1| 60S ribosomal protein L10 [Aspergillus oryzae RIB40]&gt;gi|83775097|dbj|BAE65220.1| unnamed protein product [Aspergillus oryzae RIB40]&gt;gi|391869427|gb|EIT78625.1| 60s ribosomal protein [Aspergillus oryzae 3.042]&gt;gi|635510609|gb|KDE82538.1| 60s ribosomal protein [Aspergillus oryzae 100-8]	9.88605e-142	1042
Novel00564	EQ963709	-	155–1871		gi|317158262|ref|XP_001826955.2| LEA domain protein [Aspergillus oryzae RIB40]	0	2004
Novel00565	EQ963823	+	1–848		gi|317141319|ref|XP_001818079.2| beta-alanine synthase [Aspergillus oryzae RIB40]	4.93406e-142	1068
Novel00566	EQ963984	+	56–1555		gi|83766796|dbj|BAE56936.1| unnamed protein product [Aspergillus oryzae RIB40]	2.02775e-149	1122
Novel00567	EQ964032	-	691–1518		gi|238506903|ref|XP_002384653.1| UDP-glucose 4-epimerase [Aspergillus flavus NRRL3357]&gt;gi|220689366|gb|EED45717.1| UDP-glucose 4-epimerase [Aspergillus flavus NRRL3357]	1.16493e-46	410
Novel00568	EQ964555	+	384–1275		gi|317140461|ref|XP_001818203.2| N-acetylglucosaminyl transferase component Gpi1 [Aspergillus oryzae RIB40]&gt;gi|391871968|gb|EIT81117.1| N-acetylglucosaminyltransferase complex, subunit PIG-Q/GPI1 [Aspergillus oryzae 3.042]&gt;gi|635509215|gb|KDE81185.1| N-acetylglucosaminyltransferase complex [Aspergillus oryzae 100-8]	0	1875
Novel00569	EQ964572	-	280–1016		gi|83772805|dbj|BAE62933.1| unnamed protein product [Aspergillus oryzae RIB40]	5.85599e-124	950
Novel00570	EQ964730	+	3–1197		gi|391863985|gb|EIT73284.1| Ca2+/calmodulin-dependent protein kinase kinase [Aspergillus oryzae 3.042]	8.87419e-146	1137
Novel00571	EQ964843	+	1–779		gi|145257101|ref|XP_001401614.1| mitochondrion protein [Aspergillus niger CBS 513.88]&gt;gi|327488141|sp|A2QI68.1|MIC60_ASPNC RecName: Full=MICOS complex subunit mic60; AltName: Full=Mitofilin; Flags: Precursor [Aspergillus niger CBS 513.88]&gt;gi|134058524|emb|CAL00733.1| unnamed protein product [Aspergillus niger]	5.61185e-16	191
Novel00572	EQ964885	-	1–1143		gi|317143293|ref|XP_003189491.1| hypothetical protein AOR_1_276154 [Aspergillus oryzae RIB40]	1.59066e-105	806
Novel00573	EQ964976	-	8–301		gi|169776055|ref|XP_001822494.1| hypothetical protein AOR_1_504134 [Aspergillus oryzae RIB40]&gt;gi|83771229|dbj|BAE61361.1| unnamed protein product [Aspergillus oryzae RIB40]	1.2021e-87	695
Novel00574	EQ965026	+	12–1084
Novel00575	EQ965051	+	37–1084
Novel00576	EQ965340	+	135–1009		gi|317148758|ref|XP_003190236.1| hypothetical protein AOR_1_288124 [Aspergillus oryzae RIB40]	3.80182e-167	1254
Novel00577	EQ965422	-	1–579
Novel00578	EQ965508	-	13–963		gi|317145262|ref|XP_001820634.2| cytochrome P450 monooxygenase [Aspergillus oryzae RIB40]&gt;gi|293329801|dbj|BAJ04410.1| cytochrome P450 monooxygenase [Aspergillus oryzae]	3.36547e-40	385
Novel00579	EQ965804	+	26–899		gi|391867753|gb|EIT76993.1| putative transporter [Aspergillus oryzae 3.042]&gt;gi|635512240|gb|KDE84120.1| putative transporter [Aspergillus oryzae 100-8]	1.66967e-86	708
Novel00580	EQ965948	+	3–853		gi|635503703|gb|KDE75821.1| DNA repair protein [Aspergillus oryzae 100-8]	8.80031e-125	992
Novel00581	EQ966056	+	7–772
Novel00582	EQ966081	-	2–775
