# Supplementary material for: Functional Genomic Analysis of Aspergillus flavus Interacting with Resistant and Susceptible Peanut
Source: MDPI journal article supplement (doi:10.3390/toxins8020046), 2016-02-15
Supplement: s1 [file toxins-114703-Table S3.xlsx]

## Sheet: Table S3
Gene ID	Gene Name	Readcount													RPKM
		af1_R_T1	af2_R_T1	af1_R_T2	af2_R_T2	af1_R_T3	af2_R_T3	af1_S_T1	af2_S_T1	af1_S_T2	af2_S_T2	af1_S_T3	af2_S_T3		af1_R_T1	af2_R_T1	af1_R_T2	af2_R_T2	af1_R_T3	af2_R_T3	af1_S_T1	af2_S_T1	af1_S_T2	af2_S_T2	af1_S_T3	af2_S_T3
CADAFLAG00000001	AFLA_071780	0	0	0	0	14	14	0	0	1	0	0	1		0	0	0	0	0.505398	0.589699	0	0	0.396286	0	0	0.296071
CADAFLAG00000002	AFLA_071790	0	0	0	0	50	33	0	0	12	2	5	4		0	0	0	0	1.2941	0.99657	0	0	3.40942	0.240369	0.892698	0.849078
CADAFLAG00000003	AFLA_071800	0	0	0	0	4	8	0	0	0	0	2	0		0	0	0	0	0.416505	0.971957	0	0	0	0	1.43657	0
CADAFLAG00000004	AFLA_071910	0	0	0	1	13	11	0	0	1	1	1	1		0	0	0	0.541557	0.483843	0.477695	0	0	0.408567	0.172827	0.256743	0.305247
CADAFLAG00000005	AFLA_071920	0	0	0	0	10	12	0	0	1	0	3	1		0	0	0	0	0.392458	0.549505	0	0	0.43082	0	0.812181	0.321873
CADAFLAG00000006	AFLA_072030	0	0	0	0	3	2	0	0	0	0	0	0		0	0	0	0	0.284429	0.221248	0	0	0	0	0	0
CADAFLAG00000007	AFLA_072140	0	0	1	1	11	9	0	0	6	1	0	0		0	0	2.62744	1.28487	0.971334	0.92729	0	0	5.81607	0.410041	0	0
CADAFLAG00000008	AFLA_072150	0	0	0	1	6	6	0	0	1	1	1	3		0	0	0	1.00427	0.414111	0.483185	0	0	0.757649	0.320492	0.476106	1.69816
CADAFLAG00000009	AFLA_072160	0	0	0	0	2	0	0	0	0	0	0	0		0	0	0	0	0.112939	0	0	0	0	0	0	0
CADAFLAG00000010	AFLA_072170	0	0	2	2	14	11	0	0	2	0	1	2		0	0	2.41986	1.18336	0.569286	0.521906	0	0	0.892761	0	0.280505	0.666996
CADAFLAG00000011	AFLA_072280	0	0	0	1	0	0	0	0	1	1	0	0		0	0	0	0.770922	0	0	0	0	0.581607	0.246025	0	0
CADAFLAG00000012	AFLA_072290	0	0	0	0	10	10	0	0	1	8	4	4		0	0	0	0	1.23382	1.43963	0	0	1.35443	4.58348	3.40448	4.04766
CADAFLAG00000013	AFLA_072300	0	0	0	0	0	0	0	0	0	0	0	0		0	0	0	0	0	0	0	0	0	0	0	0
CADAFLAG00000014	AFLA_072310	0	0	0	0	0	0	0	0	0	0	0	0		0	0	0	0	0	0	0	0	0	0	0	0
CADAFLAG00000015	AFLA_072320	0	0	0	0	0	0	0	0	1	0	0	0		0	0	0	0	0	0	0	0	0.460948	0	0	0
CADAFLAG00000016	AFLA_072330	0	0	0	1	17	23	0	0	0	9	2	0		0	0	0	0.627066	0.73262	1.15652	0	0	0	1.80104	0.594563	0
CADAFLAG00000017	AFLA_072340	0	0	2	1	120	106	0	0	13	22	21	26		0	0	2.84349	0.695261	5.73385	5.90973	0	0	6.81884	4.88134	6.92185	10.1889
CADAFLAG00000018	AFLA_072350	0	0	46	0	1	1	0	0	0	0	0	1		0	0	112.584	0	0.0822549	0.0959752	0	0	0	0	0	0.67461
CADAFLAG00000019	AFLA_072360	0	0	0	0	2	3	0	0	0	0	0	1		0	0	0	0	0.0665946	0.116554	0	0	0	0	0	0.273086
CADAFLAG00000020	AFLA_072370	0	0	0	0	1	1	0	0	0	0	0	0		0	0	0	0	0.0776458	0.0905973	0	0	0	0	0	0
CADAFLAG00000021	AFLA_072380	0	0	2	1	410	368	0	0	151	56	173	143		0	0	3.2289	0.789498	22.246	23.2977	0	0	89.9389	14.1094	64.7518	63.6348
CADAFLAG00000022	AFLA_072390	0	0	1	4	28	19	0	0	3	3	3	2		0	0	1.96336	3.84049	1.84757	1.46283	0	0	2.17304	0.919214	1.36553	1.08234
CADAFLAG00000023	AFLA_072400	0	0	0	0	8	3	0	0	0	2	2	0		0	0	0	0	0.805088	0.352266	0	0	0	0.93462	1.38842	0
CADAFLAG00000024	AFLA_072410	0	0	0	0	15	12	0	0	0	2	2	1		0	0	0	0	1.40733	1.31366	0	0	0	0.871338	1.29441	0.769477
CADAFLAG00000025	AFLA_072420	2	3	13	8	206	206	0	0	16	28	24	24		15.7901	30.3246	3.78694	1.13962	2.01677	2.35317	0	0	1.71953	1.27291	1.62083	1.92704
CADAFLAG00000026	AFLA_072430	0	0	0	0	156	103	0	0	4	7	2	1		0	0	0	0	3.60739	2.77909	0	0	1.01539	0.751655	0.319034	0.189653
CADAFLAG00000027	AFLA_072440	0	0	0	0	0	1	0	0	0	0	0	0		0	0	0	0	0	0.112399	0	0	0	0	0	0
CADAFLAG00000028	AFLA_072450	0	0	0	0	3	3	0	0	0	0	0	2		0	0	0	0	0.177185	0.20674	0	0	0	0	0	0.968784
CADAFLAG00000029	AFLA_072460	0	0	0	1	110	65	0	0	4	6	13	4		0	0	0	0.247979	1.87467	1.29253	0	0	0.748331	0.474826	1.52831	0.55909
CADAFLAG00000030	AFLA_072470	0	0	0	0	0	0	0	0	0	0	0	0		0	0	0	0	0	0	0	0	0	0	0	0
CADAFLAG00000031	AFLA_072480	0	0	0	0	0	1	0	0	0	0	0	0		0	0	0	0	0	0.0686881	0	0	0	0	0	0
CADAFLAG00000032	AFLA_072490	0	0	0	1	11	8	0	0	1	2	1	2		0	0	0	2.88037	2.1775	1.84779	0	0	2.17304	1.83843	1.36553	3.24702
CADAFLAG00000033	AFLA_072500	0	0	0	4	31	26	0	0	3	12	5	6		0	0	0	1.87224	0.997194	0.975862	0	0	1.05936	1.79247	1.1095	1.58292
CADAFLAG00000034	AFLA_072510	0	0	0	0	0	0	0	0	0	0	0	0		0	0	0	0	0	0	0	0	0	0	0	0
CADAFLAG00000035	AFLA_072520	0	0	0	0	0	0	0	0	0	0	0	0		0	0	0	0	0	0	0	0	0	0	0	0
CADAFLAG00000036	AFLA_072530	0	0	0	0	0	0	0	0	0	0	0	0		0	0	0	0	0	0	0	0	0	0	0	0
CADAFLAG00000037	AFLA_072540	0	0	0	0	0	0	0	0	0	0	0	0		0	0	0	0	0	0	0	0	0	0	0	0
CADAFLAG00000038	AFLA_072550	0	0	0	0	0	0	0	0	0	0	0	0		0	0	0	0	0	0	0	0	0	0	0	0
CADAFLAG00000039	AFLA_072560	0	0	1	1	21	19	0	0	2	4	0	1		0	0	0.412306	0.201626	0.290993	0.307194	0	0	0.304225	0.25738	0	0.113646
CADAFLAG00000040	AFLA_072570	0	2	11	15	87	75	0	0	5	20	9	10		0	86.107	13.6481	9.10116	3.62779	3.64906	0	0	2.28873	3.87261	2.58883	3.4199
CADAFLAG00000041	AFLA_072580	0	0	0	0	2	4	0	0	0	2	1	0		0	0	0	0	0.290546	0.678018	0	0	0	1.34917	1.00213	0
CADAFLAG00000042	AFLA_072590	0	0	1	0	59	39	0	0	4	11	4	7		0	0	1.15268	0	2.28563	1.76285	0	0	1.70104	1.97878	1.06893	2.22404
CADAFLAG00000043	AFLA_072600	0	1	7	6	145	118	0	1	10	20	21	13		0	34.6998	6.99997	2.93411	4.87315	4.62722	0	348.789	3.6893	3.12121	4.86854	3.58324
CADAFLAG00000044	AFLA_072610	0	0	2	0	43	19	0	0	2	8	6	2		0	0	7.99997	0	5.78056	2.98024	0	0	2.95144	4.99394	5.56404	2.20507
CADAFLAG00000045	AFLA_072620	0	0	0	0	37	30	0	0	2	5	3	6		0	0	0	0	1.38857	1.31366	0	0	0.823944	0.871338	0.776648	1.84674
CADAFLAG00000046	AFLA_072630	0	1	35	70	456	419	1	0	60	153	100	85		0	49.4657	49.8934	48.7977	21.8466	23.4223	905.541	0	31.5553	34.0378	33.0488	33.3986
CADAFLAG00000047	AFLA_072640	0	0	4	2	26	29	0	0	3	7	6	5		0	0	7.24321	1.77104	1.5823	2.05925	0	0	2.00419	1.97817	2.51886	2.4956
CADAFLAG00000048	AFLA_072650	0	1	24	57	1146	1022	0	0	82	180	127	74		0	44.3893	30.7015	35.6574	49.2693	51.2672	0	0	38.6998	35.9349	37.6646	26.0924
CADAFLAG00000049	AFLA_072660	1	1	9	28	374	272	0	0	23	60	38	25		67.254	86.107	22.3332	33.9777	31.1906	26.4678	0	0	21.0563	23.2357	21.8612	17.0995
CADAFLAG00000050	AFLA_072670	1	1	15	18	369	302	0	0	64	120	23	32		41.2695	52.8384	22.8408	13.4035	18.8838	18.033	0	0	35.9539	28.5165	8.1195	13.4309
CADAFLAG00000051	AFLA_072680	10	30	186	138	5258	5134	1	0	376	1523	258	218		1886.61	7246.41	1294.75	469.762	1230.09	1401.42	4421.86	0	965.619	1654.5	416.364	418.276
CADAFLAG00000052	AFLA_072690	1	0	2	3	91	69	0	0	13	10	10	9		58.8132	0	4.34006	3.18356	6.63668	5.87158	0	0	10.4077	3.38658	5.03092	5.38322
CADAFLAG00000053	AFLA_072700	0	0	4	7	239	216	0	0	19	34	31	25		0	0	10.0187	8.5738	20.1183	21.215	0	0	17.5569	13.2899	18.0008	17.2593
CADAFLAG00000054	AFLA_072710	0	0	12	17	366	366	0	0	30	72	36	29		0	0	102.095	70.729	104.652	122.108	0	0	94.165	95.5982	71.0078	68.0071
CADAFLAG00000055	AFLA_072720	2	1	50	69	1487	1223	0	0	125	261	178	142		66.3327	42.4637	61.187	41.2918	61.1566	58.6888	0	0	56.4345	49.8453	50.4998	47.8973
CADAFLAG00000056	AFLA_072730	0	5	50	97	297	225	0	0	178	540	450	342		0	198.708	57.2647	54.3269	11.4319	10.1051	0	0	75.2113	96.5175	119.484	107.964
CADAFLAG00000057	AFLA_072740	2	1	53	238	600	486	0	2	138	980	541	460		55.3404	35.4269	54.1103	118.825	20.5872	19.4572	0	712.194	51.9791	156.144	128.051	129.448
CADAFLAG00000058	AFLA_072750	0	4	49	146	967	830	0	2	190	667	357	324		0	247.988	87.5463	127.562	58.0646	58.1514	0	1246.34	125.239	185.978	147.874	159.559
CADAFLAG00000059	AFLA_072760	0	0	20	61	242	237	0	1	79	233	130	110		0	0	37.0933	55.325	15.0842	17.2367	0	646.889	54.0553	67.4398	55.8971	56.2331
CADAFLAG00000060	AFLA_072770	1	20	295	1195	4256	3680	3	3	937	5063	2122	1746		24.2519	621.005	263.972	522.914	127.991	129.129	1705.26	936.315	309.33	707.032	440.213	430.64
CADAFLAG00000061	AFLA_072780	3	13	172	654	1881	1652	1	1	470	2620	1337	1046		101.115	560.994	213.902	397.731	78.6172	80.563	789.985	433.761	215.64	508.489	385.477	358.551
CADAFLAG00000062	AFLA_072790	1	3	53	81	1054	887	1	1	95	232	248	231		20.1203	77.2816	39.3461	29.4061	26.2972	25.822	471.584	258.935	26.0193	26.8787	42.6834	47.2685
CADAFLAG00000063	AFLA_072800	0	0	1	10	50	43	0	0	17	17	17	13		0	0	5.20386	25.4479	8.74458	8.77474	0	0	32.6378	13.8061	20.5095	18.6467
CADAFLAG00000064	AFLA_072810	0	0	2	3	118	108	0	0	14	16	31	13		0	0	4.06059	2.97856	8.05164	8.5985	0	0	10.4866	5.0696	14.5916	7.27506
CADAFLAG00000065	AFLA_072820	0	0	0	0	1	0	0	0	1	0	0	0		0	0	0	0	0.0575522	0	0	0	0.631778	0	0	0
CADAFLAG00000066	AFLA_072830	0	0	8	3	179	137	0	0	16	19	19	25		0	0	7.89684	1.44814	5.93826	5.30303	0	0	5.82678	2.92693	4.34808	6.80201
CADAFLAG00000067	AFLA_072840	0	0	5	5	73	79	0	0	4	16	12	9		0	0	4.65276	2.27529	2.283	2.88275	0	0	1.37324	2.32357	2.58883	2.30843
CADAFLAG00000068	AFLA_072850	0	0	1	1	24	18	0	0	0	1	1	1		0	0	2.76288	1.3511	2.22852	1.95018	0	0	0	0.431178	0.640534	0.761544
CADAFLAG00000069	AFLA_072860	0	0	4	4	32	29	0	0	7	7	5	5		0	0	9.4449	4.61874	2.5394	2.68519	0	0	6.09791	2.57947	2.73708	3.25418
CADAFLAG00000070	AFLA_072870	0	0	0	1	34	39	0	0	0	7	6	3		0	0	0	0.556504	1.30036	1.74039	0	0	0	1.24318	1.58298	0.941017
CADAFLAG00000071	AFLA_072880	0	0	0	1	14	9	0	0	1	2	0	1		0	0	0	0.840107	0.808313	0.606305	0	0	0.633803	0.536208	0	0.473524
CADAFLAG00000072	AFLA_072890	0	0	0	0	4	1	0	0	1	1	0	0		0	0	0	0	0.246765	0.0719814	0	0	0.677214	0.286467	0	0
CADAFLAG00000073	AFLA_072900	0	0	0	0	2	1	0	0	0	2	0	1		0	0	0	0	0.114012	0.0665144	0	0	0	0.529421	0	0.46753
CADAFLAG00000074	AFLA_072910	0	0	1	0	21	11	0	0	1	1	1	0		0	0	1.3886	0	0.980027	0.598975	0	0	0.512297	0.216706	0.321927	0
CADAFLAG00000075	AFLA_072920	1	0	13	18	67	51	0	0	14	44	19	13		30.7772	0	14.7627	9.99585	2.55705	2.27107	0	0	5.86536	7.79774	5.00214	4.0691
CADAFLAG00000076	AFLA_072930	0	0	7	3	23	10	0	0	0	4	5	2		0	0	8.99757	1.88571	0.993569	0.504042	0	0	0	0.802383	1.48997	0.708583
CADAFLAG00000077	AFLA_072940	0	0	0	0	0	0	0	0	0	0	0	0		0	0	0	0	0	0	0	0	0	0	0	0
CADAFLAG00000078	AFLA_072950	0	0	0	0	0	0	0	0	0	0	0	0		0	0	0	0	0	0	0	0	0	0	0	0
CADAFLAG00000079	AFLA_072960	0	0	1	0	8	10	0	0	9	3	7	4		0	0	0.755991	0	0.203259	0.296454	0	0	2.51018	0.353943	1.22686	0.83351
CADAFLAG00000080	AFLA_072970	0	1	1	2	28	20	0	0	1	8	1	4		0	153.712	4.42973	4.33245	4.16849	3.47414	0	0	1.63427	5.53048	1.02697	4.88395
CADAFLAG00000081	AFLA_072980	0	0	1	2	23	20	0	0	1	5	3	3		0	0	0.967505	0.946258	0.747867	0.758793	0	0	0.356943	0.75495	0.672908	0.800034
CADAFLAG00000082	AFLA_072990	0	0	0	0	10	6	0	0	0	0	0	0		0	0	0	0	0.776458	0.543584	0	0	0	0	0	0
CADAFLAG00000083	AFLA_073000	0	0	0	0	0	0	0	0	0	0	0	0		0	0	0	0	0	0	0	0	0	0	0	0
CADAFLAG00000084	AFLA_073010	0	0	50	97	647	574	0	0	75	242	81	63		0	0	72.0427	68.3468	31.3305	32.4319	0	0	39.8682	54.4165	27.0574	25.0204
CADAFLAG00000085	AFLA_073020	0	0	2	0	6	4	0	0	0	3	2	2		0	0	7.94071	0	0.800615	0.622772	0	0	0	1.85885	1.84094	2.18873
CADAFLAG00000086	AFLA_073030	3	0	159	380	4631	4082	0	0	424	863	449	379		81.6116	0	159.595	186.523	156.221	160.67	0	0	157.012	135.185	104.484	104.856
CADAFLAG00000087	AFLA_073040	0	0	14	48	333	279	0	0	32	94	37	29		0	0	22.0705	37.0043	17.643	17.2476	0	0	18.6114	23.1263	13.5228	12.6013
CADAFLAG00000088	AFLA_073050	0	0	10	28	213	151	0	0	13	30	16	6		0	0	10.656	14.5908	7.62812	6.30975	0	0	5.11074	4.98897	3.95272	1.7623
CADAFLAG00000089	AFLA_073060	0	1	8	10	305	186	0	0	80	86	148	119		0	19.6193	4.52319	2.76491	5.79559	4.1239	0	0	16.6875	7.58836	19.3998	18.5454
CADAFLAG00000090	AFLA_073070	2	3	48	42	352	308	0	0	67	160	40	66		89.9496	172.747	79.6529	34.0829	19.6312	20.0425	0	0	41.0186	41.4358	15.3887	30.1883
CADAFLAG00000091	AFLA_073080	0	0	5	18	27	27	0	0	6	8	19	11		0	0	7.99997	14.0837	1.45186	1.69403	0	0	3.54173	1.99758	7.04779	4.85115
CADAFLAG00000092	AFLA_073090	2	0	1	1	25	19	1	0	7	14	2	4		100.881	0	1.8611	0.910116	1.5637	1.38664	1182.23	0	4.80634	4.06624	0.862942	2.05194
CADAFLAG00000093	AFLA_073100	0	0	0	0	0	0	0	0	0	0	0	0		0	0	0	0	0	0	0	0	0	0	0	0
CADAFLAG00000094	AFLA_073110	0	0	3	4	21	18	0	0	15	6	4	4		0	0	13.5126	8.81054	3.17891	3.17928	0	0	24.926	4.21757	4.17693	4.96604
CADAFLAG00000095	AFLA_073120	0	0	0	0	0	0	0	0	0	0	0	0		0	0	0	0	0	0	0	0	0	0	0	0
CADAFLAG00000096	AFLA_073130	0	0	2	1	7	7	0	0	4	0	0	0		0	0	1.94555	0.475705	0.228851	0.267024	0	0	1.43555	0	0	0
CADAFLAG00000097	AFLA_073140	0	0	5	14	123	102	0	0	6	46	13	7		0	0	6.88943	9.43339	5.69589	5.51129	0	0	3.05007	9.89159	4.15277	2.65855
CADAFLAG00000098	AFLA_073150	1	0	40	83	1172	1040	0	0	104	278	91	105		37.4404	0	55.2575	56.0707	54.4129	56.3384	0	0	53.0042	59.9337	29.1443	39.9811
CADAFLAG00000099	AFLA_073160	1	0	32	55	669	591	0	0	75	157	95	76		27.4092	0	32.3621	27.2005	22.7382	23.4377	0	0	27.983	24.7789	22.2737	21.1853
CADAFLAG00000100	AFLA_073170	2	0	31	83	931	792	0	0	66	196	106	74		44.2218	0	25.2906	33.1133	25.5265	25.3374	0	0	19.8649	24.9545	20.0486	16.6404
CADAFLAG00000101	AFLA_073180	2	7	83	197	374	310	0	1	111	424	399	272		61.8164	277.008	94.6549	109.865	14.3344	13.8633	0	397.768	46.7018	75.4616	105.492	85.5004
CADAFLAG00000102	AFLA_073190	1	0	24	39	754	633	0	1	77	148	99	76		22.5923	0	20.0061	15.898	21.1235	20.6917	0	290.748	23.6804	19.2535	19.1323	17.4622
CADAFLAG00000103	AFLA_073200	0	0	0	1	7	12	0	0	2	1	4	3		0	0	0	0.85379	0.410739	0.821573	0	0	1.28825	0.272471	1.61907	1.44371
CADAFLAG00000104	AFLA_073210	0	8	130	223	804	762	0	0	205	694	466	391		0	315.239	147.627	123.837	30.6846	33.9325	0	0	85.8857	122.992	122.684	122.386
CADAFLAG00000105	AFLA_073220	0	0	1	2	28	22	0	0	8	2	4	2		0	0	3.13449	3.06565	2.94963	2.70414	0	0	9.2513	0.978345	2.90675	1.72795
CADAFLAG00000106	AFLA_073230	0	0	0	0	5	3	0	0	0	0	0	0		0	0	0	0	0.367629	0.25737	0	0	0	0	0	0
CADAFLAG00000107	AFLA_073240	0	0	1	1	49	47	0	0	0	2	0	1		0	0	2.04579	1.00043	3.369	3.77051	0	0	0	0.638538	0	0.563892
CADAFLAG00000108	AFLA_073250	0	0	0	0	10	11	0	0	0	1	2	0		0	0	0	0	1.81958	2.3354	0	0	0	0.844934	2.51038	0
CADAFLAG00000109	AFLA_073260	0	0	15	28	333	310	0	0	36	77	47	41		0	0	17.4782	15.9547	13.0404	14.1647	0	0	15.4758	14.002	12.6965	13.1681
CADAFLAG00000110	AFLA_073270	0	1	4	8	144	116	0	0	15	27	26	12		0	74.3965	8.57597	8.38763	10.376	9.75261	0	0	11.8648	9.03403	12.9234	7.0915
CADAFLAG00000111	AFLA_073280	0	1	54	94	851	784	0	0	112	211	117	84		0	71.8113	111.752	95.13	59.1883	63.6238	0	0	85.512	68.146	56.1345	47.9155
CADAFLAG00000112	AFLA_073290	4	3	115	248	2259	1917	0	0	142	498	305	277		159.198	152.869	168.876	178.094	111.488	110.391	0	0	76.9315	114.129	103.837	112.12
CADAFLAG00000113	AFLA_073300	0	0	1	1	49	34	0	0	5	5	4	1		0	0	8.37497	4.09552	13.7918	11.1661	0	0	15.4489	6.53504	7.76648	2.30843
CADAFLAG00000114	AFLA_073310	0	0	21	44	667	560	0	1	52	107	70	66		0	0	37.6453	38.5719	40.1847	39.3659	0	625.254	34.3907	29.9344	29.0918	32.6114
CADAFLAG00000115	AFLA_073320	1	1	66	179	619	526	0	0	56	625	225	164		35.089	44.9254	85.4489	113.329	26.9337	26.7047	0	0	26.7483	126.281	67.5346	58.5249
CADAFLAG00000116	AFLA_073330	7	3	68	133	784	698	0	0	90	248	132	136		262.76	144.179	94.1805	90.0803	36.4931	37.9095	0	0	45.9876	53.6042	42.3845	51.9188
CADAFLAG00000117	AFLA_073340	0	0	16	50	741	641	0	0	54	112	91	80		0	0	27.844	42.5509	43.3385	43.7432	0	0	34.6698	30.4176	36.7143	38.3739
CADAFLAG00000118	AFLA_073350	3	8	108	276	2856	2393	0	0	220	695	397	278		76.3233	260.583	101.38	126.696	90.1007	88.0866	0	0	76.1895	101.814	86.397	71.9293
CADAFLAG00000119	AFLA_073360	1	0	2	5	20	13	0	0	3	10	8	4		115.293	0	8.5079	10.4013	2.85934	2.16858	0	0	4.70825	6.63877	7.88975	4.69015
CADAFLAG00000120	AFLA_073370	0	0	0	0	6	4	0	0	0	1	0	0		0	0	0	0	0.245086	0.190645	0	0	0	0.189679	0	0
CADAFLAG00000121	AFLA_073380	0	0	6	13	212	214	0	0	15	19	4	7		0	0	12.4651	13.2073	14.8021	17.434	0	0	11.4969	6.16016	1.92657	4.00844
CADAFLAG00000122	AFLA_073390	0	0	0	0	16	8	0	0	2	5	1	1		0	0	0	0	1.13028	0.659406	0	0	1.55095	1.64017	0.487308	0.579371
CADAFLAG00000123	AFLA_073400	1	1	6	16	321	302	0	1	15	27	24	16		23.8536	30.5404	5.28077	6.8864	9.49498	10.423	0	306.98	4.8706	3.70855	4.89709	3.8815
CADAFLAG00000124	AFLA_073410	0	0	22	58	637	571	0	0	57	157	75	55		0	0	24.9301	32.1408	24.2596	25.3734	0	0	23.8299	27.7649	19.7035	17.179
CADAFLAG00000125	AFLA_073420	3	1	19	49	398	369	0	0	47	107	71	50		322.819	137.771	75.4367	95.1375	53.1075	57.4507	0	0	68.8451	66.2991	65.3535	54.7184
CADAFLAG00000126	AFLA_073430	0	1	101	199	3237	2765	0	0	275	728	538	410		0	28.7171	83.5859	80.5361	90.0321	89.7319	0	0	83.9634	94.0238	103.223	93.5253
CADAFLAG00000127	AFLA_073440	0	1	14	11	352	295	0	0	36	72	56	38		0	36.9764	14.9184	5.7321	12.6061	12.327	0	0	14.1528	11.9735	13.8345	11.1612
CADAFLAG00000128	AFLA_073450	2	3	57	85	705	681	0	1	136	576	380	313		42.1068	80.8657	44.2781	32.2893	18.4054	20.7444	0	270.943	38.9761	69.8283	68.435	67.0181
CADAFLAG00000129	AFLA_073460	10	14	259	737	3910	3055	0	1	419	1717	644	533		225.339	403.91	215.341	299.655	109.257	99.6045	0	289.996	128.525	222.789	124.135	122.149
CADAFLAG00000130	AFLA_073470	0	0	35	55	446	415	0	0	56	144	98	59		0	0	44.141	33.9206	18.9039	20.524	0	0	26.056	28.3421	28.6537	20.5097
CADAFLAG00000131	AFLA_073480	14	10	359	719	10357	9212	0	0	925	2086	1378	1271		1255.41	1148.09	1187.8	1163.33	1151.66	1195.2	0	0	1129.11	1077.1	1057.01	1159.12
CADAFLAG00000132	AFLA_073490	0	1	6	14	165	133	0	0	20	22	13	18		0	85.317	14.7522	16.833	13.6343	12.8233	0	0	18.1419	8.44159	7.41022	12.1987
CADAFLAG00000133	AFLA_073500	0	1	44	114	1484	1242	0	0	133	381	162	158		0	61.7911	78.3519	99.2722	88.8124	86.7278	0	0	87.3764	105.881	66.8794	77.551
CADAFLAG00000134	AFLA_073510	0	3	12	36	788	666	0	0	49	131	86	54		0	165.081	19.0295	27.9174	41.9967	41.4153	0	0	28.6674	32.42	31.6174	23.6034
CADAFLAG00000135	AFLA_073520	1	0	31	97	873	739	0	0	75	169	107	69		39.0507	0	44.6665	68.3468	42.2744	41.7546	0	0	39.8682	38.0016	35.7425	27.4033
CADAFLAG00000136	AFLA_073530	0	1	19	51	549	508	0	0	50	191	91	86		0	49.7303	27.2298	35.7427	26.4428	28.5493	0	0	26.4367	42.7189	30.2353	33.9722
CADAFLAG00000137	AFLA_073540	1	0	5	16	209	175	0	0	20	51	22	22		37.9291	0	6.99736	10.9499	9.83	9.60378	0	0	10.3262	11.1386	7.13786	8.48635
CADAFLAG00000138	AFLA_073550	0	1	19	41	383	307	0	0	51	107	63	49		0	221.418	121.238	127.936	82.1345	76.8179	0	0	120.06	106.552	93.1977	86.1814
CADAFLAG00000139	AFLA_073560	4	9	336	389	20775	18002	1	4	1350	926	621	495		98.4872	283.715	305.246	172.817	634.301	641.316	577.091	1267.46	452.471	131.286	130.793	123.951
CADAFLAG00000140	AFLA_073570	0	0	72	120	2241	1851	0	0	161	328	265	185		0	0	43.4593	35.4207	45.4606	43.8123	0	0	35.8527	30.8972	37.0832	30.7791
CADAFLAG00000141	AFLA_073580	0	1	6	33	314	243	0	0	24	67	32	25		0	28.4826	4.92494	13.2462	8.66209	7.82161	0	0	7.26786	8.58261	6.08949	5.65619
CADAFLAG00000142	AFLA_073590	3	2	37	71	1893	1538	0	0	166	311	253	230		82.3829	70.318	37.4895	35.1797	64.4616	61.1088	0	0	62.0528	49.1771	59.4304	64.2346
CADAFLAG00000143	AFLA_073600	0	0	26	34	1322	1180	0	0	76	257	203	154		0	0	27.7057	17.7174	47.3445	49.308	0	0	29.8782	42.7389	50.1501	45.2324
CADAFLAG00000144	AFLA_073610	0	0	10	24	256	214	0	0	38	83	47	36		0	0	20.3801	23.9191	17.5344	17.1026	0	0	28.5717	26.3986	22.2068	20.2229
CADAFLAG00000145	AFLA_073620	0	0	0	0	1	0	0	0	0	0	0	0		0	0	0	0	0.108517	0	0	0	0	0	0	0
CADAFLAG00000146	AFLA_073630	1	2	29	62	1077	846	0	0	86	200	124	108		21.5213	55.1085	23.0281	24.0756	28.7421	26.3433	0	0	25.1944	24.7847	22.8277	23.6383
CADAFLAG00000147	AFLA_073640	0	2	5	19	502	464	0	0	32	67	52	38		0	45.0342	3.24454	6.02924	10.9479	11.807	0	0	7.66088	6.78504	7.82289	6.79674
CADAFLAG00000148	AFLA_073650	2	0	72	285	2088	1765	0	1	201	659	824	610		68.0415	0	90.379	174.947	88.0864	86.88	0	437.824	93.0844	129.097	239.797	211.057
CADAFLAG00000149	AFLA_073660	0	0	19	52	392	365	0	0	27	104	108	88		0	0	28.8497	38.6116	20.004	21.7331	0	0	15.1251	24.6443	38.0183	36.8303
CADAFLAG00000150	AFLA_073670	0	0	40	133	1038	898	0	0	121	333	335	324		0	0	59.2263	96.3013	51.6529	52.14	0	0	66.0976	76.9473	114.995	132.231
CADAFLAG00000151	AFLA_073680	2	2	286	409	3996	3520	0	0	518	2712	1502	1435		70.348	90.0684	371.175	259.575	174.294	179.141	0	0	248.021	549.285	451.922	513.333
CADAFLAG00000152	AFLA_073690	0	0	1	3	114	108	0	0	6	11	10	8		0	0	1.12133	1.64506	4.29619	4.74896	0	0	2.48217	1.92496	2.59966	2.47263
CADAFLAG00000153	AFLA_073700	3	0	33	64	1506	1231	0	1	108	262	181	148		38.397	0	15.5841	14.78	23.9021	22.7963	0	164.714	18.8164	19.3092	19.8165	19.2647
CADAFLAG00000154	AFLA_073710	10	2	72	189	1188	1030	0	1	153	421	215	176		289.38	74.1001	76.8762	98.6841	42.6303	43.1257	0	372.412	60.2693	70.1514	53.2205	51.7972
CADAFLAG00000155	AFLA_073720	3	4	26	74	499	438	0	0	39	78	52	55		197.197	336.636	63.0586	87.7665	40.6738	41.6567	0	0	34.8964	29.523	29.2385	36.7678
CADAFLAG00000156	AFLA_073730	1	2	20	33	436	348	0	0	37	84	42	38		22.5572	57.7612	16.6459	13.4313	12.1957	11.3579	0	0	11.3612	10.9107	8.10415	8.71755
CADAFLAG00000157	AFLA_073740	2	2	51	70	1534	1291	0	0	103	251	146	121		91.9422	117.716	86.506	58.0631	87.4469	85.8702	0	0	64.4553	66.4423	57.4129	56.5712
CADAFLAG00000158	AFLA_073750	0	0	2	0	20	13	0	0	1	2	5	0		0	0	1.77483	0	0.596485	0.452386	0	0	0.327395	0.276982	1.02867	0
CADAFLAG00000159	AFLA_073760	4	3	40	102	1228	1055	0	2	131	276	188	138		41.8943	40.2288	15.4578	19.2758	15.9488	15.9874	0	269.576	18.6768	16.6453	16.8432	14.6994
CADAFLAG00000160	AFLA_073770	1	0	56	37	964	858	0	0	103	198	183	147		16.9706	0	35.0653	11.3297	20.2866	21.0677	0	0	23.7943	19.3486	26.5657	25.3712
CADAFLAG00000161	AFLA_073780	1	4	28	30	4269	3748	0	2	3155	678	3204	2728		31.1068	159.307	32.1369	16.8381	164.67	168.689	0	800.646	1335.95	121.443	852.55	863.027
CADAFLAG00000162	AFLA_073790	3	1	92	230	2297	1958	0	0	293	887	487	395		122.074	52.0984	138.128	168.869	115.904	115.278	0	0	162.296	207.832	169.514	163.465
CADAFLAG00000163	AFLA_073800	0	0	7	11	2923	2436	0	0	2989	711	2415	2148		0	0	10.569	8.12182	148.322	144.229	0	0	1664.97	167.533	845.343	893.929
CADAFLAG00000164	AFLA_073810	0	0	0	0	1090	964	0	0	5	9	13	9		0	0	0	0	56.1002	57.8911	0	0	2.82495	2.15096	4.61551	3.79902
CADAFLAG00000165	AFLA_073820	0	0	0	0	33	31	0	0	1	0	2	2		0	0	0	0	8.14324	8.92569	0	0	2.70886	0	3.40448	4.04766
CADAFLAG00000166	AFLA_073830	0	0	1	0	14	18	0	0	0	2	1	0		0	0	5.30691	0	2.49697	3.74588	0	0	0	1.65641	1.23033	0
CADAFLAG00000167	AFLA_073840	0	0	3	8	3736	3150	0	0	20	23	27	18		0	0	1.46314	1.90801	61.2372	60.2443	0	0	3.59866	1.7506	3.05288	2.41976
CADAFLAG00000168	AFLA_073850	1	3	90	120	5373	4308	0	1	512	492	714	513		19.2664	74.0018	63.9785	41.7157	128.366	120.09	0	247.945	134.279	54.5823	117.671	100.518
CADAFLAG00000169	AFLA_073860	0	0	6	12	138	106	0	0	10	21	22	12		0	0	4.47286	4.37463	3.45745	3.0987	0	0	2.7503	2.44314	3.80223	2.46575
CADAFLAG00000170	AFLA_073870	1	0	2	2	122	110	0	0	6	13	17	11		16.6402	0	1.22794	0.600489	2.5174	2.64839	0	0	1.35908	1.24562	2.4198	1.86155
CADAFLAG00000171	AFLA_073880	0	1	0	0	2	5	0	0	0	1	0	0		0	72.6528	0	0	0.140733	0.410519	0	0	0	0.326752	0	0
CADAFLAG00000172	AFLA_073890	0	0	0	0	11	7	0	0	1	0	0	1		0	0	0	0	1.0828	0.803989	0	0	1.08058	0	0	0.80732
CADAFLAG00000173	AFLA_073900	1	0	4	8	42	46	0	0	4	44	18	30		32.3538	0	4.77504	4.67017	1.68504	2.15335	0	0	1.76166	8.19718	4.98162	9.87124
CADAFLAG00000174	AFLA_073910	0	0	0	0	9	14	0	0	0	0	1	0		0	0	0	0	0.256121	0.464866	0	0	0	0	0.196309	0
CADAFLAG00000175	AFLA_073920	0	0	3	21	301	293	0	0	43	45	56	42		0	0	6.30586	21.5858	21.2634	24.1507	0	0	33.3455	14.7615	27.2893	24.3336
CADAFLAG00000176	AFLA_073930	1	0	2	6	114	90	1	0	8	15	12	11		28.2624	0	2.08559	3.05969	3.99529	3.68029	662.419	0	3.07777	2.4411	2.9011	3.16174
CADAFLAG00000177	AFLA_073940	0	0	22	58	997	798	0	0	115	210	181	166		0	0	34.9564	45.0669	53.2405	49.7218	0	0	67.4136	52.0736	66.6751	72.7019
CADAFLAG00000178	AFLA_073950	1	0	39	80	1687	1301	0	0	111	265	196	132		7.76422	0	11.1726	11.2074	16.2423	14.6153	0	0	11.7316	11.8476	13.0175	10.4231
CADAFLAG00000179	AFLA_073960	0	0	6	11	82	97	0	0	15	42	25	15		0	0	10.1772	9.1242	4.67448	6.4519	0	0	9.3867	11.1178	9.83098	7.01296
CADAFLAG00000180	AFLA_073970	0	0	0	2	22	37	0	0	11	12	4	10		0	0	0	2.06389	1.56025	3.06176	0	0	8.56382	3.9519	1.95691	5.81652
CADAFLAG00000181	AFLA_073980	3	1	81	135	3429	2811	1	1	292	553	457	405		82.2275	35.0927	81.9167	66.7647	116.546	111.478	642.422	352.737	108.947	87.2785	107.148	112.895
CADAFLAG00000182	AFLA_073990	6	4	123	225	3320	2808	0	0	360	763	537	455		374.082	319.298	282.952	253.114	256.678	253.305	0	0	305.531	273.922	286.393	288.504
CADAFLAG00000183	AFLA_074000	0	0	17	43	627	528	0	0	55	138	83	57		0	0	26.7999	33.1496	33.2196	32.6406	0	0	31.9884	33.9514	30.3349	24.7681
CADAFLAG00000184	AFLA_074010	1	0	17	42	545	496	0	0	42	120	59	46		42.6008	0	26.7213	32.2838	28.7904	30.5725	0	0	24.3559	29.4364	21.5002	19.9297
CADAFLAG00000185	AFLA_074020	0	0	3	6	79	76	0	0	6	8	2	5		0	0	4.55522	4.45519	4.03142	4.52524	0	0	3.36113	1.89572	0.704043	2.09263
CADAFLAG00000186	AFLA_074030	0	0	3	5	45	47	0	0	5	15	3	2		0	0	12.8639	10.4845	6.48498	7.90298	0	0	7.90986	10.0378	2.98233	2.36383
CADAFLAG00000187	AFLA_074040	1	2	18	44	690	559	0	0	44	126	75	51		54.6123	139.843	36.2705	43.3571	46.7276	44.1706	0	0	32.7099	39.623	35.0367	28.326
CADAFLAG00000188	AFLA_074050	2	1	11	39	829	670	0	0	50	67	91	58		63.4361	40.6094	12.8733	22.3197	32.6058	30.7477	0	0	21.588	12.2368	24.6899	18.7094
CADAFLAG00000189	AFLA_074060	0	1	9	14	341	303	0	0	28	38	39	41		0	30.0632	7.79738	5.93145	9.92896	10.2941	0	0	8.94973	5.13789	7.83343	9.79093
CADAFLAG00000190	AFLA_074070	1	2	25	63	1241	1028	0	0	83	225	107	89		23.8929	61.1813	22.0394	27.1598	36.7684	35.538	0	0	26.995	30.9554	21.8688	21.6264
CADAFLAG00000191	AFLA_074080	0	0	14	38	763	686	0	1	75	124	119	77		0	0	9.4987	12.608	17.3982	18.2516	0	236.647	18.7734	13.1296	18.7182	14.3999
CADAFLAG00000192	AFLA_074090	0	0	9	18	218	176	0	0	14	45	19	28		0	0	17.2903	16.9105	14.0753	13.259	0	0	9.92276	13.4917	8.4624	14.8269
CADAFLAG00000193	AFLA_074100	1	1	34	46	796	744	0	0	70	130	89	72		24.8322	31.7934	31.152	20.6106	24.5111	26.7313	0	0	23.662	18.5885	18.9051	18.1833
CADAFLAG00000194	AFLA_074110	0	0	9	12	184	161	0	0	14	29	18	22		0	0	8.78685	5.72926	6.03742	6.16391	0	0	5.04272	4.41859	4.07422	5.92035
CADAFLAG00000195	AFLA_074120	0	0	1	11	151	130	0	0	8	30	15	13		0	0	2.58936	13.9287	13.1405	13.2001	0	0	7.64238	12.123	9.00461	9.27833
CADAFLAG00000196	AFLA_074130	3	1	41	65	1905	1610	0	1	151	292	237	175		50.7932	21.6773	25.613	19.8571	39.9958	39.4404	0	217.891	34.8015	28.4678	34.3246	30.1334
CADAFLAG00000197	AFLA_074140	0	0	0	4	10	12	0	0	1	1	2	2		0	0	0	20.9691	3.60277	5.04446	0	0	3.95493	1.67297	4.97055	5.90958
CADAFLAG00000198	AFLA_074150	0	1	9	17	269	233	0	0	25	37	25	17		0	41.7958	10.8404	10.0133	10.8893	11.0052	0	0	11.1094	6.95504	6.9811	5.64398
CADAFLAG00000199	AFLA_074160	0	0	0	1	73	62	0	0	3	5	3	5		0	0	0	0.834756	4.18793	4.15016	0	0	1.8893	1.33198	1.18723	2.35254
CADAFLAG00000200	AFLA_074170	0	1	28	107	683	529	0	0	50	39	68	62		0	38.3487	30.9442	57.8271	25.3679	22.9254	0	0	20.3862	6.72637	17.4225	18.8863
CADAFLAG00000201	AFLA_074180	1	0	12	20	106	97	0	0	6	7	27	10		24.0113	0	10.6314	8.66491	3.15614	3.36992	0	0	1.96112	0.967833	5.54565	2.44198
CADAFLAG00000202	AFLA_074190	0	0	0	2	23	16	0	0	2	6	9	10		0	0	0	2.73035	2.15791	1.75155	0	0	2.05986	2.61401	5.82486	7.69477
CADAFLAG00000203	AFLA_074200	0	0	10	7	51	37	0	0	8	38	34	19		0	0	13.3002	4.55284	2.27967	1.92974	0	0	3.92549	7.88745	10.4838	6.96539
CADAFLAG00000204	AFLA_074210	0	0	0	0	2	0	0	0	0	0	1	3		0	0	0	0	0.228023	0	0	0	0	0	0.786479	2.80518
CADAFLAG00000205	AFLA_074220	0	0	5	6	276	227	0	0	17	55	32	37		0	0	2.98108	1.74937	5.53039	5.30725	0	0	3.73937	5.11754	4.42318	6.0805
CADAFLAG00000206	AFLA_074230	0	0	0	8	117	87	0	0	9	19	4	13		0	0	0	3.40961	3.42702	2.97336	0	0	2.89385	2.58426	0.808219	3.12295
CADAFLAG00000207	AFLA_074240	0	0	0	1	30	31	0	0	16	8	9	9		0	0	0	2.78844	5.7491	6.93165	0	0	33.659	7.11902	11.8976	14.1453
CADAFLAG00000208	AFLA_074250	8	11	4	10	158	113	1	1	12	12	15	9		235.73	414.99	4.34887	5.3167	5.7732	4.81764	690.636	379.211	4.8133	2.03607	3.78084	2.69707
CADAFLAG00000209	AFLA_074260	0	0	4	11	49	40	0	0	3	14	5	5		0	0	9.24134	12.4278	3.80465	3.62389	0	0	2.55707	5.04775	2.6781	3.18404
CADAFLAG00000210	AFLA_074270	0	0	0	3	32	22	0	0	1	2	5	7		0	0	0	1.34417	0.985372	0.790442	0	0	0.338028	0.285978	1.06208	1.76782
CADAFLAG00000211	AFLA_074280	1	2	81	180	589	572	0	0	88	301	236	226		52.8249	135.266	157.876	171.565	38.5824	43.7186	0	0	63.2789	91.557	106.641	121.415
CADAFLAG00000212	AFLA_074290	1	1	43	77	234	226	1	1	45	103	103	69		117.152	149.993	185.87	162.764	33.9938	38.308	2745.83	1507.67	71.7628	69.4822	103.219	82.2099
CADAFLAG00000213	AFLA_074300	0	0	0	0	1	1	0	0	0	1	0	0		0	0	0	0	0.272937	0.318463	0	0	0	1.2674	0	0
CADAFLAG00000214	AFLA_074310	0	0	0	0	0	0	0	0	0	0	0	0		0	0	0	0	0	0	0	0	0	0	0	0
CADAFLAG00000215	AFLA_074320	0	0	1	1	7	9	0	0	1	2	2	1		0	0	3.91239	1.91324	0.920415	1.38078	0	0	1.4434	1.22115	1.81407	1.07839
CADAFLAG00000216	AFLA_074330	0	0	1	4	21	30	0	0	3	8	5	3		0	0	1.28537	2.51428	0.907171	1.51213	0	0	1.42264	1.60477	1.48997	1.06287
CADAFLAG00000217	AFLA_074340	0	0	0	3	11	20	0	0	1	8	4	3		0	0	0	2.97856	0.750576	1.59232	0	0	0.74904	2.5348	1.88278	1.67886
CADAFLAG00000218	AFLA_074350	0	0	1	3	46	40	0	0	5	15	11	12		0	0	1.5905	2.33335	2.45886	2.49479	0	0	2.93392	3.72323	4.05608	5.26076
CADAFLAG00000219	AFLA_074360	0	0	0	0	7	9	0	0	1	1	0	0		0	0	0	0	0.494497	0.741832	0	0	0.775476	0.328033	0	0
CADAFLAG00000220	AFLA_074370	1	0	4	1	56	46	0	0	5	12	12	6		51.697	0	7.62986	0.932788	3.58995	3.44076	0	0	3.51862	3.57218	5.30663	3.15458
CADAFLAG00000221	AFLA_074380	0	0	4	6	164	147	0	0	8	26	22	16		0	0	5.00933	3.67449	6.9025	7.21899	0	0	3.6962	5.08145	6.38738	5.52298
CADAFLAG00000222	AFLA_074390	0	0	0	0	7	9	0	0	0	0	0	0		0	0	0	0	0.555493	0.833335	0	0	0	0	0	0
CADAFLAG00000223	AFLA_074400	0	0	5	7	139	136	0	0	11	24	21	22		0	0	3.901	2.67073	3.64472	4.16088	0	0	3.16625	2.92222	3.79845	4.73111
CADAFLAG00000224	AFLA_074410	0	0	8	8	111	93	0	0	7	51	31	39		0	0	12.8768	6.29702	6.00461	5.87005	0	0	4.15683	12.811	11.5681	17.3028
CADAFLAG00000225	AFLA_074420	0	0	2	2	33	33	0	0	1	23	16	9		0	0	3.21921	1.57425	1.78515	2.08292	0	0	0.593833	5.77752	5.97062	3.99296
CADAFLAG00000226	AFLA_074430	0	0	1	0	25	29	0	0	0	0	3	3		0	0	0.971011	0	0.815844	1.10424	0	0	0	0	0.675346	0.802933
CADAFLAG00000227	AFLA_074440	0	0	0	0	6	5	0	0	0	1	0	0		0	0	0	0	1.31809	1.28162	0	0	0	1.0201	0	0
CADAFLAG00000228	AFLA_074450	0	0	4	5	62	72	0	0	6	25	23	15		0	0	6.89386	4.21404	3.59118	4.86603	0	0	3.81504	6.72415	9.18991	7.1257
CADAFLAG00000229	AFLA_074460	0	0	4	6	593	505	0	0	29	28	36	33		0	0	12.393	9.09064	61.7468	61.3548	0	0	33.1483	13.5385	25.8583	28.1815
CADAFLAG00000230	AFLA_074470	0	0	0	0	2	1	0	0	0	0	0	0		0	0	0	0	0.118903	0.0693682	0	0	0	0	0	0
CADAFLAG00000231	AFLA_074480	0	0	0	0	0	0	0	0	0	0	0	0		0	0	0	0	0	0	0	0	0	0	0	0
CADAFLAG00000232	AFLA_074490	0	0	5	5	0	4	0	0	0	3	5	1		0	0	10.8943	5.32751	0	0.341765	0	0	0	1.0201	2.52568	0.600567
CADAFLAG00000233	AFLA_074500	0	0	1	6	4	5	0	0	3	1	0	0		0	0	1.03876	3.04783	0.139642	0.203668	0	0	1.14969	0.162109	0	0
CADAFLAG00000234	AFLA_074510	0	0	0	1	0	1	0	0	0	0	1	0		0	0	0	1.09214	0	0.0875774	0	0	0	0	0.517765	0
CADAFLAG00000235	AFLA_074520	0	0	14	14	139	124	0	0	12	32	24	21		0	0	14.0261	6.85904	4.68023	4.87159	0	0	4.43544	5.00327	5.57444	5.79912
CADAFLAG00000236	AFLA_074530	0	0	8	26	117	85	0	0	12	22	35	15		0	0	8.12118	12.9071	3.9917	3.38367	0	0	4.49424	3.48535	8.23717	4.19715
CADAFLAG00000237	AFLA_074540	1	9	712	1628	3791	3125	0	0	1051	631	975	780		45.682	526.39	1200.1	1341.89	214.75	206.55	0	0	653.558	165.982	380.997	362.38
CADAFLAG00000238	AFLA_074560	0	0	1	0	28	13	0	0	2	4	0	5		0	0	1.00941	0	0.949882	0.514579	0	0	0.744808	0.63012	0	1.39114
CADAFLAG00000239	AFLA_074570	0	0	0	0	44	50	0	0	3	5	4	3		0	0	0	0	1.4307	1.89698	0	0	1.07083	0.75495	0.89721	0.800034
CADAFLAG00000240	AFLA_074580	0	0	0	0	0	0	0	0	0	0	0	0		0	0	0	0	0	0	0	0	0	0	0	0
CADAFLAG00000241	AFLA_074590	0	0	20	32	342	308	0	0	33	72	14	16		0	0	38.2856	29.9558	22.0026	23.1204	0	0	23.3058	21.5096	6.21318	8.44226
CADAFLAG00000242	AFLA_074600	0	0	0	0	0	1	0	0	0	0	0	0		0	0	0	0	0	0.128162	0	0	0	0	0	0
CADAFLAG00000243	AFLA_074610	0	0	2	6	19	17	0	0	3	7	2	1		0	0	2.0655	3.03021	0.659466	0.688469	0	0	1.14304	1.12821	0.478858	0.284662
CADAFLAG00000244	AFLA_074620	3	0	25	144	998	744	0	0	248	47	49	45		72.7556	0	22.3705	63.0122	30.013	26.1065	0	0	81.8717	6.5634	10.1651	11.099
CADAFLAG00000245	AFLA_074630	0	0	4	3	464	357	0	0	20	16	20	20		0	0	4.11515	1.50929	16.043	14.4024	0	0	7.59104	2.56886	4.7702	5.67139
CADAFLAG00000246	AFLA_074640	0	0	0	0	0	0	0	0	0	0	0	0		0	0	0	0	0	0	0	0	0	0	0	0
CADAFLAG00000247	AFLA_074650	3	3	11	8	15	11	1	0	9	32	3	3		325.228	416.398	43.9998	15.6486	2.01647	1.7254	2540.92	0	13.2815	19.9758	2.78202	3.3076
CADAFLAG00000248	AFLA_074660	0	0	3	2	13	6	0	0	1	5	3	1		0	0	2.71621	0.885518	0.395574	0.213026	0	0	0.334031	0.70649	0.629714	0.24956
CADAFLAG00000249	AFLA_074670	0	0	0	0	0	0	0	0	0	0	0	0		0	0	0	0	0	0	0	0	0	0	0	0
CADAFLAG00000250	AFLA_074680	0	0	0	0	1	1	0	0	0	0	0	0		0	0	0	0	0.156642	0.18277	0	0	0	0	0	0
CADAFLAG00000251	AFLA_074690	0	0	0	1	1	0	0	0	0	0	1	0		0	0	0	1.44018	0.0989771	0	0	0	0	0	0.682767	0
CADAFLAG00000252	AFLA_074700	0	0	8	12	190	171	0	0	17	20	30	17		0	0	6.28737	4.61197	5.01852	5.27005	0	0	4.92916	2.45303	5.46614	3.68266
CADAFLAG00000253	AFLA_074710	0	0	4	7	100	77	0	0	9	26	14	17		0	0	7.99997	6.84625	6.72158	6.03892	0	0	6.64074	8.11515	6.49138	9.37154
CADAFLAG00000254	AFLA_074720	0	0	0	6	57	58	0	0	9	14	8	8		0	0	0	6.89772	4.50346	5.34683	0	0	7.80578	5.13631	4.36013	5.18385
CADAFLAG00000255	AFLA_074730	0	0	3	2	40	18	0	0	3	4	4	5		0	0	7.80579	2.54479	3.49783	1.83657	0	0	2.8798	1.62424	2.41289	3.58591
CADAFLAG00000256	AFLA_074740	0	0	0	0	7	10	0	0	6	1	2	0		0	0	0	0	0.38799	0.646725	0	0	3.6507	0.25738	0.764699	0
CADAFLAG00000257	AFLA_074750	0	0	0	0	4	5	0	0	0	0	3	2		0	0	0	0	0.444786	0.648721	0	0	0	0	2.30118	1.82395
CADAFLAG00000258	AFLA_074760	1	0	0	1	21	18	0	0	5	7	1	2		33.7834	0	0	0.609566	0.879745	0.879847	0	0	2.29938	1.36172	0.288985	0.687161
CADAFLAG00000259	AFLA_074770	0	0	0	0	10	9	0	0	0	1	0	0		0	0	0	0	1.07867	1.13274	0	0	0	0.500889	0	0
CADAFLAG00000260	AFLA_074780	0	0	3	10	102	83	0	0	6	24	5	7		0	0	15.3142	24.9632	17.4992	16.6147	0	0	11.2998	19.1196	5.91732	9.84931
CADAFLAG00000261	AFLA_074790	0	1	1	3	16	18	0	0	0	7	4	3		0	170.634	4.91741	7.21413	2.64423	3.47096	0	0	0	5.37192	4.56013	4.06623
CADAFLAG00000262	AFLA_074800	0	0	14	44	262	186	0	0	36	181	76	76		0	0	20.3912	31.3397	12.8251	10.6235	0	0	19.3448	41.1423	25.6631	30.5114
CADAFLAG00000263	AFLA_074810	0	0	0	0	0	1	0	0	0	0	0	0		0	0	0	0	0	0.102032	0	0	0	0	0	0
CADAFLAG00000264	AFLA_074820	0	0	86	30	216	192	0	0	64	125	98	81		0	0	72.9364	12.4421	6.15663	6.38539	0	0	20.025	16.5444	19.2687	18.935
CADAFLAG00000265	AFLA_074830	0	0	0	0	4	1	0	0	1	3	0	1		0	0	0	0	0.294103	0.0857901	0	0	0.807128	1.02427	0	0.603019
CADAFLAG00000266	AFLA_074840	0	0	7	5	428	375	0	0	29	24	14	7		0	0	7.31381	2.55471	15.0291	15.3644	0	0	11.1787	3.91338	3.39121	2.01594
CADAFLAG00000267	AFLA_074850	0	0	5	4	175	158	0	0	16	12	8	4		0	0	31.9046	12.4816	37.5288	39.5349	0	0	37.666	11.9498	11.8346	7.03522
CADAFLAG00000268	AFLA_074860	0	0	4	9	468	433	0	0	35	31	32	30		0	0	10.7738	11.8544	42.3642	45.7339	0	0	34.7795	13.0307	19.9821	22.2723
CADAFLAG00000269	AFLA_074870	0	0	6	7	743	599	0	0	51	31	44	17		0	0	5.75311	3.28228	23.9433	22.5226	0	0	18.0413	4.63882	9.78104	4.49298
CADAFLAG00000270	AFLA_074880	0	0	0	0	1	2	0	0	0	0	0	0		0	0	0	0	0.153964	0.359292	0	0	0	0	0	0
CADAFLAG00000271	AFLA_074890	1	0	7	7	190	181	0	0	13	34	12	18		45.3964	0	11.725	5.73373	10.6957	11.8886	0	0	8.03345	8.88765	4.65989	8.31035
CADAFLAG00000272	AFLA_074900	0	0	0	0	2	0	0	0	0	0	0	0		0	0	0	0	0.313284	0	0	0	0	0	0	0
CADAFLAG00000273	AFLA_074910	0	0	1	0	135	143	0	0	0	3	10	4		0	0	0.965762	0	4.38174	5.41559	0	0	0	0.452154	2.23898	1.06479
CADAFLAG00000274	AFLA_074920	0	0	1	1	18	27	0	0	0	1	0	0		0	0	2.96131	1.44814	1.79143	3.13537	0	0	0	0.462146	0	0
CADAFLAG00000275	AFLA_074930	0	0	0	0	5	6	0	0	0	0	0	0		0	0	0	0	0.331137	0.463645	0	0	0	0	0	0
CADAFLAG00000276	AFLA_074940	0	1	114	85	6797	5809	0	0	345	657	1624	1244		0	21.6521	71.1336	25.9367	142.538	142.138	0	0	79.4209	63.9779	234.929	213.956
CADAFLAG00000277	AFLA_074950	0	0	4	3	79	87	0	0	7	10	31	55		0	0	38.2856	14.0418	25.4124	32.6538	0	0	24.7183	14.9372	68.7888	145.101
CADAFLAG00000278	AFLA_074960	0	0	0	0	2	0	0	0	0	0	0	1		0	0	0	0	0.391605	0	0	0	0	0	0	1.60587
CADAFLAG00000279	AFLA_074970	0	0	6	8	186	182	0	0	22	27	22	14		0	0	2.63894	1.72066	2.74938	3.13899	0	0	3.56982	1.85326	2.24327	1.69723
CADAFLAG00000280	AFLA_074980	4	2	94	239	2702	2248	0	1	243	536	353	305		94.025	60.1913	81.5272	101.367	78.7595	76.4559	0	302.509	77.7547	72.5495	70.9791	72.9136
CADAFLAG00000281	AFLA_074990	0	0	14	28	287	265	0	0	32	55	31	23		0	0	17.2505	16.8717	11.885	12.8044	0	0	14.5469	10.5762	8.85557	7.81152
CADAFLAG00000282	AFLA_075000	0	0	6	29	332	249	0	0	15	45	19	8		0	0	6.54987	15.4812	12.1804	10.6591	0	0	6.04113	7.66636	4.80857	2.40716
CADAFLAG00000283	AFLA_075010	0	0	0	0	10	9	0	0	0	3	2	1		0	0	0	0	1.55292	1.63075	0	0	0	2.16332	2.14248	1.27362
CADAFLAG00000284	AFLA_075020	0	1	13	8	108	136	0	0	14	13	10	13		0	137.771	51.6146	15.5326	14.4111	21.1743	0	0	20.507	8.05504	9.20471	14.2268
CADAFLAG00000285	AFLA_075030	49	17	540	1322	13074	11917	0	1	1019	3988	1756	1525		4683	2080.16	1904.2	2279.7	1549.43	1647.88	0	1229.94	1325.68	2194.67	1435.57	1482.26
CADAFLAG00000286	AFLA_075040	2	0	5	9	222	204	0	0	15	33	17	23		35.6487	0	3.28833	2.8945	4.90684	5.26109	0	0	3.63951	3.38699	2.592	4.16934
CADAFLAG00000287	AFLA_075050	2	0	16	29	786	709	0	0	64	98	95	72		354.314	0	104.585	92.6987	172.669	181.734	0	0	154.339	99.9701	143.964	129.723
CADAFLAG00000288	AFLA_075060	3	6	73	175	2350	2024	0	0	184	518	297	197		141.037	361.148	126.627	148.446	136.998	137.675	0	0	117.752	140.226	119.438	94.19
CADAFLAG00000289	AFLA_075070	0	3	26	78	1191	836	0	0	78	221	165	113		0	47.0864	11.7603	17.253	18.105	14.8283	0	0	13.0162	15.6003	17.3025	14.0882
CADAFLAG00000290	AFLA_075080	1	0	31	68	697	593	0	0	47	159	70	80		58.0301	0	66.3752	71.1999	50.1557	49.7897	0	0	37.1268	53.1296	34.7475	47.2137
CADAFLAG00000291	AFLA_075090	0	2	3	15	142	126	0	0	14	35	22	16		0	80.5156	3.48051	8.51018	5.53672	5.73234	0	0	5.99232	6.337	5.91732	5.11652
CADAFLAG00000292	AFLA_075100	16	18	258	439	13372	11013	0	7	838	1998	1720	1429		1815.86	2615.5	1080.37	898.967	1881.88	1808.42	0	10223.9	1294.62	1305.7	1669.79	1649.37
CADAFLAG00000293	AFLA_075110	1	0	5	8	76	65	0	0	17	25	15	14		70.1781	0	12.9468	10.13	6.61377	6.60003	0	0	16.24	10.1025	9.00461	9.99205
CADAFLAG00000294	AFLA_075120	5	7	138	291	1586	1450	1	1	189	487	297	221		79.9644	143.333	81.4323	83.9725	31.4531	33.5526	374.844	205.817	41.1458	44.8479	40.6308	35.9455
CADAFLAG00000295	AFLA_075130	0	0	4	30	276	259	0	0	28	69	28	34		0	0	10.0657	36.9174	23.3419	25.5578	0	0	25.9948	27.0974	16.3351	23.5828
CADAFLAG00000296	AFLA_075140	1	1	18	59	406	303	0	0	35	168	84	60		6.96398	8.91616	4.6251	7.41356	3.50605	3.05303	0	0	3.31789	6.73679	5.0039	4.24946
CADAFLAG00000297	AFLA_075150	3	9	154	333	5718	4939	2	1	313	1517	983	833		151.321	581.222	286.61	303.069	357.65	360.454	2364.47	649.135	214.912	440.607	424.136	427.316
CADAFLAG00000298	AFLA_075160	0	0	211	262	4089	3612	0	0	465	656	486	537		0	0	1431.59	869.288	932.387	961.001	0	0	1163.95	694.6	764.457	1004.26
CADAFLAG00000299	AFLA_075170	0	0	0	2	86	66	0	0	4	1	6	4		0	0	0	0.817827	2.41683	2.16416	0	0	1.23399	0.130497	1.16315	0.921932
CADAFLAG00000300	AFLA_075180	2	0	42	89	986	828	0	0	107	256	174	151		57.4942	0	44.5486	46.1638	35.1484	34.4394	0	0	41.8711	42.376	42.7873	44.1465
CADAFLAG00000301	AFLA_075190	5	4	718	1737	15317	13486	0	0	1463	3448	2254	1904		349.203	357.675	1850.22	2188.9	1326.53	1362.77	0	0	1390.88	1386.63	1346.59	1352.39
CADAFLAG00000302	AFLA_075200	2	2	108	314	3817	3344	0	0	341	697	415	438		105.267	134.776	209.738	298.202	249.126	254.66	0	0	244.317	211.243	186.846	234.456
CADAFLAG00000303	AFLA_075210	0	0	0	0	1	2	0	0	0	0	0	0		0	0	0	0	0.042286	0.0986787	0	0	0	0	0	0
CADAFLAG00000304	AFLA_075220	0	0	0	0	2	8	0	0	2	0	4	0		0	0	0	0	0.324574	1.51485	0	0	3.563	0	4.47797	0
CADAFLAG00000305	AFLA_075230	0	0	12	26	200	164	0	0	27	40	19	23		0	0	30.3395	32.146	16.9942	16.2596	0	0	25.1847	15.7827	11.1368	16.0284
CADAFLAG00000306	AFLA_075240	0	0	0	0	0	1	0	0	0	0	0	0		0	0	0	0	0	0.145962	0	0	0	0	0	0
CADAFLAG00000307	AFLA_075250	0	0	0	0	3	1	0	0	0	0	0	1		0	0	0	0	0.207056	0.0805309	0	0	0	0	0	0.566052
CADAFLAG00000308	AFLA_075260	0	0	1	14	12	11	0	0	1	0	2	2		0	0	1.94908	13.344	0.786058	0.840743	0	0	0.719078	0	0.903735	1.07447
CADAFLAG00000309	AFLA_075270	0	0	27	200	150	142	0	0	43	2	26	19		0	0	48.5636	175.915	9.06737	10.0156	0	0	28.5339	0.561399	10.8418	9.41964
CADAFLAG00000310	AFLA_075280	0	0	10	145	125	110	0	0	29	4	21	24		0	0	12.4941	88.5931	5.24879	5.38938	0	0	13.3675	0.779939	6.08283	8.26515
CADAFLAG00000311	AFLA_075290	0	0	4	52	36	30	0	0	14	0	4	10		0	0	4.38444	27.873	1.32617	1.28948	0	0	5.66145	0	1.01647	3.02126
CADAFLAG00000312	AFLA_075300	0	0	8	93	51	45	0	0	18	0	12	7		0	0	9.28135	52.7631	1.98854	2.04726	0	0	7.70441	0	3.22763	2.23848
CADAFLAG00000313	AFLA_075310	0	0	6	134	96	86	0	0	30	6	9	15		0	0	9.68671	105.793	5.20882	5.44457	0	0	17.8687	1.51172	3.36859	6.67498
CADAFLAG00000314	AFLA_075320	0	0	1	6	43	30	0	0	10	8	6	3		0	0	1.51412	4.4426	2.18812	1.78123	0	0	5.58606	1.89036	2.10616	1.25203
CADAFLAG00000315	AFLA_075330	0	0	2	3	55	27	0	0	6	12	8	5		0	0	3.87002	2.83877	3.57675	2.04874	0	0	4.28332	3.62376	3.58884	2.66678
CADAFLAG00000316	AFLA_075340	1	0	61	94	694	652	0	0	151	195	161	143		29.2095	0	65.7424	49.5415	25.1373	27.5552	0	0	60.0396	32.7978	40.2274	42.4801
CADAFLAG00000317	AFLA_075350	0	0	0	0	1	1	0	0	0	0	0	0		0	0	0	0	0.169942	0.198288	0	0	0	0	0	0
CADAFLAG00000318	AFLA_075360	0	0	9	18	138	109	0	0	16	38	29	25		0	0	18.8437	18.4299	9.71058	8.94931	0	0	12.3592	12.4166	14.0767	14.4277
CADAFLAG00000319	AFLA_075370	0	0	0	0	0	1	0	0	0	2	2	1		0	0	0	0	0	0.0410519	0	0	0	0.326752	0.485405	0.288554
CADAFLAG00000320	AFLA_075380	0	0	0	0	0	0	0	0	0	0	0	0		0	0	0	0	0	0	0	0	0	0	0	0
CADAFLAG00000321	AFLA_075390	0	0	0	1	13	14	0	0	1	2	0	1		0	0	0	0.777785	0.694896	0.873175	0	0	0.586785	0.49643	0	0.438396
CADAFLAG00000322	AFLA_075400	0	0	1	0	6	4	0	0	1	1	2	0		0	0	1.48066	0	0.298572	0.232249	0	0	0.546261	0.231073	0.686539	0
CADAFLAG00000323	AFLA_075410	4	0	9	26	216	191	0	0	29	48	32	33		129.128	0	10.72	15.1443	8.64664	8.92121	0	0	12.7437	8.9225	8.83652	10.8342
CADAFLAG00000324	AFLA_075420	0	0	1	2	14	10	0	0	2	3	4	0		0	0	0.815826	0.79791	0.383856	0.319917	0	0	0.601968	0.381956	0.756552	0
CADAFLAG00000325	AFLA_075430	1	0	6	15	51	32	0	0	10	25	15	10		26.9016	0	5.95553	7.28093	1.70131	1.24554	0	0	3.66197	3.87261	3.45177	2.73592
CADAFLAG00000326	AFLA_075440	0	0	3	16	131	113	0	0	17	33	24	13		0	0	14.8888	38.8316	21.8501	21.9916	0	0	31.1268	25.5593	27.6141	17.7835
CADAFLAG00000327	AFLA_075450	0	0	64	167	1442	1280	0	0	143	463	214	194		0	0	89.9577	114.789	68.1187	70.5518	0	0	74.1549	101.563	69.7354	75.1612
CADAFLAG00000328	AFLA_075460	0	0	0	0	1	4	0	0	0	0	0	0		0	0	0	0	0.0504589	0.235502	0	0	0	0	0	0
CADAFLAG00000329	AFLA_075470	0	1	0	2	64	42	0	0	4	8	5	4		0	26.1959	0	0.738348	1.62378	1.24335	0	0	1.11406	0.942518	0.875096	0.832336
CADAFLAG00000330	AFLA_075480	0	0	0	0	1	1	0	0	0	0	0	0		0	0	0	0	0.0298737	0.0348567	0	0	0	0	0	0
CADAFLAG00000331	AFLA_075490	0	0	10	16	134	100	0	0	6	25	15	10		0	0	22.4267	17.5473	10.0998	8.79438	0	0	4.96435	8.74984	7.79897	6.18157
CADAFLAG00000332	AFLA_075500	0	0	50	76	728	659	0	0	86	205	112	96		0	0	65.3656	48.5869	31.9855	33.7835	0	0	41.4785	41.8242	33.9452	34.5927
CADAFLAG00000333	AFLA_075510	0	0	4	2	67	67	0	0	5	22	9	1		0	0	3.82173	0.934451	2.15138	2.51024	0	0	1.76245	3.28033	1.99353	0.26335
CADAFLAG00000334	AFLA_075520	0	0	1	3	13	16	0	0	1	3	1	1		0	0	1.43699	2.10815	0.627828	0.901601	0	0	0.530151	0.672776	0.333146	0.396085
CADAFLAG00000335	AFLA_075530	0	0	0	0	0	0	0	0	0	0	0	0		0	0	0	0	0	0	0	0	0	0	0	0
CADAFLAG00000336	AFLA_075540	0	0	0	1	15	12	0	0	0	0	0	1		0	0	0	0.695261	0.716731	0.669026	0	0	0	0	0	0.391882
CADAFLAG00000337	AFLA_075550	0	0	1	0	26	19	0	0	2	2	1	4		0	0	0.776809	0	0.678782	0.578772	0	0	0.573178	0.242459	0.180092	0.856461
CADAFLAG00000338	AFLA_075560	0	0	1	3	142	96	0	0	9	10	13	9		0	0	0.638853	0.937235	3.04883	2.40498	0	0	2.12124	0.997002	1.92542	1.58481
CADAFLAG00000339	AFLA_075570	0	0	0	0	2	4	0	0	2	0	0	0		0	0	0	0	0.0776458	0.181195	0	0	0.852356	0	0	0
CADAFLAG00000340	AFLA_075580	0	0	0	5	44	34	0	0	3	2	5	2		0	0	0	2.6801	1.62088	1.46141	0	0	1.21317	0.34212	1.27059	0.604252
CADAFLAG00000341	AFLA_075590	2	1	14	21	481	366	0	0	38	111	36	36		215.213	137.771	55.585	40.7732	64.1826	56.9837	0	0	55.662	68.7776	33.137	39.3972
CADAFLAG00000342	AFLA_075600	0	0	0	0	10	5	0	0	0	0	2	1		0	0	0	0	2.5734	1.50133	0	0	0	0	3.55039	2.11057
CADAFLAG00000343	AFLA_075610	0	0	17	32	443	367	0	0	34	74	35	31		0	0	69.557	64.0277	60.917	58.8841	0	0	51.3235	47.2518	33.2002	34.9613
CADAFLAG00000344	AFLA_075620	0	0	3	9	77	89	0	0	9	22	0	0		0	0	4.87271	7.14855	4.20323	5.66864	0	0	5.39309	5.57656	0	0
CADAFLAG00000345	AFLA_075630	0	0	0	0	126	93	0	0	9	1	22	19		0	0	0	0	11.6397	10.0242	0	0	9.12676	0.428966	14.0195	14.3951
CADAFLAG00000346	AFLA_075640	0	0	0	1	75	57	0	0	7	2	15	13		0	0	0	0.644013	3.3195	2.94363	0	0	3.40105	0.411049	4.57974	4.71896
CADAFLAG00000347	AFLA_075650	0	0	0	0	1	0	0	0	0	0	0	0		0	0	0	0	0.126858	0	0	0	0	0	0	0
CADAFLAG00000348	AFLA_075660	0	0	1	0	59	52	0	0	2	0	2	0		0	0	0.945323	0	1.87446	1.92763	0	0	0.697518	0	0.43832	0
CADAFLAG00000349	AFLA_075670	5	0	230	743	686	567	0	0	177	71	197	172		155.868	0	264.548	417.919	26.5182	25.5741	0	0	75.1097	12.7447	52.532	54.5305
CADAFLAG00000350	AFLA_075680	0	0	3	7	136	128	0	0	4	25	22	22		0	0	3.33609	3.80663	5.08274	5.58169	0	0	1.64105	4.33861	5.67178	6.7433
CADAFLAG00000351	AFLA_075690	0	0	19	33	906	784	0	0	44	59	86	77		0	0	14.0082	11.8979	22.4492	22.6665	0	0	11.9682	6.78853	14.6997	15.6478
CADAFLAG00000352	AFLA_075700	0	0	0	1	2	3	0	0	0	0	0	0		0	0	0	1.41683	0.194744	0.340842	0	0	0	0	0	0
CADAFLAG00000353	AFLA_075710	0	0	0	1	2	0	0	0	0	0	0	1		0	0	0	1.65895	0.228023	0	0	0	0	0	0	0.935061
CADAFLAG00000354	AFLA_075720	1	0	5	11	114	102	0	0	12	56	42	33		53.0177	0	9.78098	10.5228	7.49481	7.82443	0	0	8.66043	17.096	19.0477	17.7935
CADAFLAG00000355	AFLA_075730	0	0	8	6	304	251	0	0	29	37	33	31		0	0	13.4842	4.94554	17.2208	16.5901	0	0	18.0335	9.73268	12.8953	14.4023
CADAFLAG00000356	AFLA_075740	0	0	2	4	122	105	0	0	6	11	10	14		0	0	3.89817	3.81256	7.99159	8.02527	0	0	4.31447	3.34594	4.51868	7.52129
CADAFLAG00000357	AFLA_075750	0	0	1	3	192	160	0	0	11	18	17	28		0	0	2.42533	3.5581	15.65	15.2171	0	0	9.84259	6.813	9.55874	18.7181
CADAFLAG00000358	AFLA_075760	0	0	6	9	105	86	0	0	10	13	20	7		0	0	4.21492	3.09177	2.47897	2.36907	0	0	2.5917	1.4252	3.25724	1.35541
CADAFLAG00000359	AFLA_075770	0	0	4	6	60	42	0	0	5	6	6	4		0	0	8.5079	6.2408	4.28901	3.50309	0	0	3.92354	1.99163	2.95866	2.34507
CADAFLAG00000360	AFLA_075780	0	0	1	1	59	63	0	0	6	5	2	1		0	0	2.67999	1.31057	5.31408	6.62085	0	0	5.93239	2.09121	1.24264	0.738698
CADAFLAG00000361	AFLA_075800	1	3	9	31	151	124	0	0	14	54	24	16		25.5755	98.2348	8.49292	14.3055	4.78889	4.58856	0	0	4.87403	7.95249	5.25058	4.16168
CADAFLAG00000362	AFLA_075790	0	0	0	0	0	0	0	0	0	0	0	0		0	0	0	0	0	0	0	0	0	0	0	0
CADAFLAG00000363	AFLA_075810	0	0	0	0	5	0	0	0	0	0	0	0		0	0	0	0	0.378442	0	0	0	0	0	0	0
CADAFLAG00000364	AFLA_075820	0	0	0	0	0	0	0	0	0	0	0	0		0	0	0	0	0	0	0	0	0	0	0	0
CADAFLAG00000365	AFLA_075830	2	1	21	34	756	603	0	0	40	66	62	57		73.928	47.326	28.6411	22.6765	34.6526	32.2499	0	0	20.1269	14.0478	19.6039	21.4279
CADAFLAG00000366	AFLA_075840	1	0	6	27	43	42	0	0	7	11	14	9		24.6218	0	5.45083	11.995	1.31287	1.49624	0	0	2.34614	1.55955	2.94863	2.25365
CADAFLAG00000367	AFLA_075850	4	0	30	94	230	192	0	0	29	61	43	36		113.27	0	31.3449	48.0286	8.07638	7.8666	0	0	11.1787	9.9465	10.4159	10.3677
CADAFLAG00000368	AFLA_075860	1	6	56	84	1837	1565	0	0	231	491	225	188		19.8726	152.66	41.0614	30.1197	45.2687	44.9987	0	0	62.489	56.1852	38.248	37.996
CADAFLAG00000369	AFLA_075870	0	0	33	73	1106	921	0	0	141	221	117	128		0	0	113.384	122.656	127.713	124.09	0	0	178.732	118.502	93.1977	121.222
CADAFLAG00000370	AFLA_075880	0	0	8	9	556	431	0	0	40	80	51	56		0	0	8.35864	4.59848	19.5238	17.6589	0	0	15.4188	13.0446	12.3537	16.1275
CADAFLAG00000371	AFLA_075890	0	0	4	8	385	368	0	0	28	60	34	49		0	0	8.44091	8.25554	27.3044	30.4521	0	0	21.7988	19.7595	16.6337	28.5009
CADAFLAG00000372	AFLA_075900	0	0	0	0	15	12	0	0	1	3	2	2		0	0	0	0	0.66883	0.624314	0	0	0.489471	0.621152	0.615166	0.731384
CADAFLAG00000373	AFLA_075910	1	2	12	65	665	566	0	0	56	72	33	33		27.2549	69.7903	12.0675	31.9651	22.475	22.3199	0	0	20.7764	11.2996	7.69362	9.1471
CADAFLAG00000374	AFLA_075920	0	0	3	0	1	4	0	0	1	1	0	0		0	0	4.62067	0	0.0517639	0.241593	0	0	0.568237	0.240369	0	0
CADAFLAG00000375	AFLA_075930	0	0	0	0	0	2	0	0	0	0	0	0		0	0	0	0	0	0.113614	0	0	0	0	0	0
CADAFLAG00000376	AFLA_075940	0	0	35	84	1124	1022	0	1	130	239	203	189		0	0	75.9511	89.1398	81.9739	86.9675	0	756.886	104.077	80.9392	102.128	113.048
CADAFLAG00000377	AFLA_075950	0	0	0	0	0	0	0	0	0	0	0	0		0	0	0	0	0	0	0	0	0	0	0	0
CADAFLAG00000378	AFLA_075960	0	0	0	0	0	2	0	0	0	0	0	0		0	0	0	0	0	0.197357	0	0	0	0	0	0
CADAFLAG00000379	AFLA_075970	0	0	8	9	206	162	0	0	20	32	30	23		0	0	7.35503	4.04635	6.36509	5.84049	0	0	6.78376	4.59134	6.39435	5.82849
CADAFLAG00000380	AFLA_075980	1	8	9	83	36	18	0	2	18	74	192	171		38.946	398.909	12.9329	58.3255	1.7386	1.0143	0	1002.42	9.54273	16.5951	63.9641	67.7305
CADAFLAG00000381	AFLA_075990	0	0	0	0	0	2	0	0	1	0	2	1		0	0	0	0	0	0.318463	0	0	1.49808	0	1.88278	1.11924
CADAFLAG00000382	AFLA_076000	0	0	1	1	3	4	0	0	0	3	2	3		0	0	2.69346	1.31715	0.271565	0.422484	0	0	0	1.26103	1.24888	2.22723
CADAFLAG00000383	AFLA_076010	0	0	2	3	98	79	0	0	7	9	4	4		0	0	0.832942	0.610987	1.37168	1.29018	0	0	1.07554	0.584954	0.386212	0.459175
CADAFLAG00000384	AFLA_076020	1	1	8	20	114	91	0	0	14	39	22	25		124.161	158.967	36.6494	44.8057	17.5519	16.3478	0	0	23.662	27.8828	23.3658	31.5683
CADAFLAG00000385	AFLA_076030	0	0	1	2	45	44	0	0	3	4	9	7		0	0	9.92589	9.70791	15.0115	17.1262	0	0	10.9859	6.19618	20.7106	19.1514
CADAFLAG00000386	AFLA_076040	0	0	111	114	3680	2880	0	1	464	680	1058	841		0	0	83.4443	41.9087	92.9746	84.8997	0	262.203	128.688	79.7769	184.391	174.262
CADAFLAG00000387	AFLA_076050	6	3	89	137	2617	2080	1	1	182	518	333	257		141.495	90.5801	77.4413	58.2947	76.5296	70.9718	552.733	303.492	58.4251	70.3407	67.175	61.6381
CADAFLAG00000388	AFLA_076060	5	3	59	131	1753	1550	0	0	137	348	220	154		114.385	87.8698	49.8014	54.0738	49.7295	51.3052	0	0	42.6634	45.842	43.052	35.8298
CADAFLAG00000389	AFLA_076070	10	9	153	419	4108	3399	0	1	326	1078	457	346		277.23	319.45	156.503	209.591	141.223	136.34	0	356.776	123.025	172.086	108.375	97.5532
CADAFLAG00000390	AFLA_076080	2	3	107	252	2714	2520	0	0	298	749	585	452		58.9724	113.256	116.411	134.072	99.2345	107.51	0	0	119.611	127.171	147.553	135.545
CADAFLAG00000391	AFLA_076090	2	0	21	45	670	537	0	0	54	102	70	74		50.5869	0	19.5983	20.537	21.0144	19.6523	0	0	18.5925	14.8557	15.1453	19.0355
CADAFLAG00000392	AFLA_076100	2	3	83	140	1551	1258	0	0	221	552	383	298		77.2705	148.397	118.319	97.5954	74.3071	70.3228	0	0	116.229	122.803	126.577	117.091
CADAFLAG00000393	AFLA_076110	0	0	4	4	63	55	0	0	7	6	8	5		0	0	3.43039	1.67753	1.81579	1.84963	0	0	2.21476	0.803025	1.59057	1.18192
CADAFLAG00000394	AFLA_076120	0	2	48	90	2090	1769	0	0	121	283	310	231		0	47.326	32.7327	30.013	47.8994	47.3051	0	0	30.4419	30.1177	49.0098	43.4197
CADAFLAG00000395	AFLA_076130	0	0	0	0	3	3	0	0	0	1	0	0		0	0	0	0	0.153092	0.178628	0	0	0	0.236964	0	0
CADAFLAG00000396	AFLA_076140	0	0	0	0	0	0	0	0	0	0	0	0		0	0	0	0	0	0	0	0	0	0	0	0
CADAFLAG00000397	AFLA_076150	1	0	4	8	180	155	0	0	8	25	16	18		28.0984	0	4.14699	4.05591	6.27174	6.3015	0	0	3.05991	4.0449	3.84568	5.14374
CADAFLAG00000398	AFLA_076160	0	0	12	20	3787	3427	0	0	193	229	458	342		0	0	16.0398	13.073	170.121	179.627	0	0	95.1747	47.7693	141.927	126.002
CADAFLAG00000399	AFLA_076170	0	1	437	1722	334822	307050	0	0	16205	14012	18282	16700		0	65.2601	821.863	1583.72	21162.9	22644.7	0	0	11243.8	4112.57	7971.18	8657.02
CADAFLAG00000400	AFLA_076180	0	0	64	331	63782	59073	0	0	2912	2133	2729	2653		0	0	138.882	351.253	4651.65	5026.84	0	0	2331.33	722.357	1372.94	1586.85
CADAFLAG00000401	AFLA_076190	0	0	10	21	9928	8514	0	0	418	301	406	322		0	0	58.2606	59.8302	1943.93	1945.13	0	0	898.457	273.676	548.381	517.089
CADAFLAG00000402	AFLA_076200	0	0	0	2	49	38	0	0	5	4	2	2		0	0	0	2.29924	3.87139	3.50309	0	0	4.33655	1.46752	1.09003	1.29596
CADAFLAG00000403	AFLA_076210	0	0	0	0	0	0	0	0	0	0	1	0		0	0	0	0	0	0	0	0	0	0	0.722463	0
CADAFLAG00000404	AFLA_076220	0	0	0	0	9	6	0	0	0	0	0	0		0	0	0	0	2.49422	1.94018	0	0	0	0	0	0
CADAFLAG00000405	AFLA_076230	0	0	1	1	96	82	0	0	6	12	9	5		0	0	2.01503	0.985389	6.50123	6.47941	0	0	4.46045	3.77361	4.20441	2.77706
CADAFLAG00000406	AFLA_076240	0	0	12	20	930	756	0	0	75	46	68	55		0	0	13.862	11.298	36.1053	34.2458	0	0	31.9633	8.29274	18.211	17.5122
CADAFLAG00000407	AFLA_076250	0	0	0	0	0	0	0	0	0	0	0	0		0	0	0	0	0	0	0	0	0	0	0	0
CADAFLAG00000408	AFLA_076260	0	0	0	0	0	0	0	0	0	0	0	0		0	0	0	0	0	0	0	0	0	0	0	0
CADAFLAG00000409	AFLA_076270	0	0	0	0	2	0	0	0	0	0	0	0		0	0	0	0	0.130535	0	0	0	0	0	0	0
CADAFLAG00000410	AFLA_076280	0	0	0	0	0	0	0	0	0	0	0	0		0	0	0	0	0	0	0	0	0	0	0	0
CADAFLAG00000411	AFLA_076290	2	1	10	23	496	421	0	0	21	64	34	22		47.3188	30.2917	8.72961	9.81858	14.5519	14.4118	0	0	6.76332	8.71906	6.88105	5.2936
CADAFLAG00000412	AFLA_076300	0	0	0	0	0	3	0	0	0	0	0	0		0	0	0	0	0	0.34646	0	0	0	0	0	0
CADAFLAG00000413	AFLA_076310	0	0	0	0	0	0	0	0	0	0	0	0		0	0	0	0	0	0	0	0	0	0	0	0
CADAFLAG00000414	AFLA_076320	0	0	6	2	202	222	0	0	18	35	22	17		0	0	5.49741	0.896114	6.22016	7.97628	0	0	6.08451	5.00461	4.67316	4.29329
CADAFLAG00000415	AFLA_076330	0	0	2	2	52	51	0	0	4	6	7	5		0	0	7.44442	3.64046	6.505	7.44408	0	0	5.49296	3.48535	6.04059	5.12985
CADAFLAG00000416	AFLA_076340	0	0	1	0	43	44	0	0	1	3	4	2		0	0	1.64753	0	2.38093	2.84267	0	0	0.607827	0.771348	1.52783	0.908235
CADAFLAG00000417	AFLA_076350	0	0	1	2	68	41	0	0	3	3	5	6		0	0	1.99256	1.9488	4.55368	3.20357	0	0	2.20535	0.932882	2.30973	3.29531
CADAFLAG00000418	AFLA_076360	0	0	2	1	94	86	0	0	10	6	6	5		0	0	2.90514	0.710335	4.58889	4.89864	0	0	5.35898	1.36014	2.02055	2.00189
CADAFLAG00000419	AFLA_076370	0	0	0	0	0	0	0	0	0	0	0	0		0	0	0	0	0	0	0	0	0	0	0	0
CADAFLAG00000420	AFLA_076380	1	1	25	73	502	441	0	0	38	139	73	62		77.2705	98.9315	71.2763	101.778	48.1008	49.3042	0	0	39.97	61.8465	48.2513	48.7226
CADAFLAG00000421	AFLA_076390	1	1	21	51	448	407	0	0	39	119	64	47		149.761	191.743	116.041	137.812	83.1979	88.1913	0	0	79.5063	102.62	81.9884	71.5852
CADAFLAG00000422	AFLA_076400	2	2	44	92	2025	1553	0	0	135	331	211	149		23.9322	30.641	19.4266	19.8636	30.0478	26.8878	0	0	21.9899	22.807	21.5977	18.1328
CADAFLAG00000423	AFLA_076410	0	0	1	2	17	9	0	0	1	3	3	5		0	0	2.06153	2.01626	1.17783	0.727566	0	0	0.760563	0.965175	1.43381	2.84115
CADAFLAG00000424	AFLA_076420	0	0	5	12	112	76	0	0	18	44	12	7		0	0	25.5237	29.9558	19.2148	15.2134	0	0	33.8994	35.0527	14.2016	9.84931
CADAFLAG00000425	AFLA_076430	39	22	412	1032	6801	5768	2	2	913	3162	1247	1006		1358.63	981.248	529.571	648.684	293.794	290.732	1633.01	896.647	432.956	634.284	371.599	356.417
CADAFLAG00000426	AFLA_076440	2	0	36	68	543	527	0	0	41	97	65	52		73.1832	0	48.6043	44.896	24.6386	27.9012	0	0	20.4222	20.438	20.3454	19.3513
CADAFLAG00000427	AFLA_076450	5	7	152	393	3885	3324	0	0	401	1339	695	616		208.719	374.12	234.114	296.007	201.103	200.764	0	0	227.863	321.854	248.17	261.516
CADAFLAG00000428	AFLA_076460	0	2	15	35	361	283	0	0	30	64	28	35		0	39.1973	8.47204	9.66699	6.85247	6.26792	0	0	6.25121	5.6412	3.66637	5.44877
CADAFLAG00000429	AFLA_076470	0	1	1	0	11	12	0	0	3	0	0	0		0	123.994	3.57332	0	1.32101	1.68149	0	0	3.95493	0	0	0
CADAFLAG00000430	AFLA_076480	1	2	75	79	1156	983	0	0	99	237	134	106		65.1429	166.808	180.268	92.8563	93.3811	92.6513	0	0	87.7888	88.8999	74.6696	70.226
CADAFLAG00000431	AFLA_076490	4	2	55	149	1898	1604	0	0	154	380	228	147		85.3266	54.623	43.2891	57.3493	50.206	49.5063	0	0	44.718	46.6761	41.6037	31.8909
CADAFLAG00000432	AFLA_076500	1	0	2	11	203	184	0	0	12	27	18	18		20.2324	0	1.49303	4.01567	5.09305	5.38637	0	0	3.30496	3.14555	3.11524	3.70378
CADAFLAG00000433	AFLA_076510	0	0	13	27	515	481	0	1	50	94	79	54		0	0	10.5098	10.6743	13.9926	15.2488	0	281.977	14.913	11.8597	14.8067	12.0331
CADAFLAG00000434	AFLA_076520	2	4	28	64	1239	987	0	0	83	167	94	87		27.153	69.5294	14.0261	15.6778	20.859	19.3882	0	0	15.3392	13.0554	10.9166	12.0125
CADAFLAG00000435	AFLA_076530	0	0	38	78	3611	3016	0	0	219	220	252	243		0	0	41.0644	41.2195	131.145	127.806	0	0	87.3115	37.1021	63.1339	72.3805
CADAFLAG00000436	AFLA_076540	0	0	0	3	111	100	0	0	4	2	6	7		0	0	0	1.60806	4.08903	4.29828	0	0	1.61756	0.34212	1.52471	2.11488
CADAFLAG00000437	AFLA_076550	0	0	85	156	3331	2959	0	0	219	308	430	444		0	0	96.73	86.8146	127.397	132.047	0	0	91.9458	54.7001	113.447	139.27
CADAFLAG00000438	AFLA_076560	0	1	14	34	347	291	0	0	29	51	23	21		0	28.3956	11.4564	13.6059	9.54321	9.33802	0	0	8.75519	6.51309	4.36346	4.73669
CADAFLAG00000439	AFLA_076570	0	0	7	34	389	292	0	0	35	80	35	41		0	0	8.91208	21.1683	16.6446	14.5782	0	0	16.4397	15.8952	10.3307	14.3879
CADAFLAG00000440	AFLA_076580	1	0	6	4	77	88	0	0	14	25	12	14		55.8725	0	12.3692	4.03251	5.33487	7.11398	0	0	10.6479	8.04312	5.73524	7.95521
CADAFLAG00000441	AFLA_076590	0	0	16	40	1309	1282	0	0	93	150	141	111		0	0	27.2253	33.2842	74.8575	85.5422	0	0	58.3823	39.8326	55.6228	52.0606
CADAFLAG00000442	AFLA_076600	59	41	877	1441	36944	30959	3	2	2281	3558	3050	2403		714.833	636	392.052	315.017	555.048	542.714	851.919	311.845	376.197	248.225	316.1	296.095
CADAFLAG00000443	AFLA_076610	3	2	18	29	437	360	0	0	32	91	51	48		45.0213	38.4279	9.9669	7.85257	8.13228	7.81682	0	0	6.53707	7.86365	6.54695	7.32593
CADAFLAG00000444	AFLA_076620	1	1	31	50	1198	987	0	0	74	170	118	103		61.5545	78.8098	70.4065	55.5325	91.4431	87.9039	0	0	62.0053	60.2552	62.1318	64.4796
CADAFLAG00000445	AFLA_076630	5	0	38	77	1368	1080	0	0	101	176	116	96		132.787	0	37.2357	36.8971	45.0511	41.4992	0	0	36.5126	26.9143	26.3521	25.9287
CADAFLAG00000446	AFLA_076640	3	5	152	276	4742	3876	0	0	568	1085	900	706		50.6947	108.176	94.7712	84.1527	99.366	94.7669	0	0	130.655	105.574	130.094	121.331
CADAFLAG00000447	AFLA_076650	0	0	19	28	611	552	0	0	60	95	85	93		0	0	29.6045	21.3348	31.9955	33.7275	0	0	34.4907	23.1006	30.7047	39.9412
CADAFLAG00000448	AFLA_076660	0	0	0	0	3	4	0	0	0	1	0	0		0	0	0	0	0.380574	0.592072	0	0	0	0.589074	0	0
CADAFLAG00000449	AFLA_076670	4	2	90	153	2575	1922	0	0	172	463	299	212		29.1265	18.6457	24.1804	20.1019	23.2509	20.2495	0	0	17.0488	19.4132	18.624	15.6996
CADAFLAG00000450	AFLA_076680	13	15	208	612	3971	3357	0	1	360	1404	674	517		316.33	467.314	186.746	268.699	119.821	118.19	0	313.15	119.244	196.721	140.291	127.942
CADAFLAG00000451	AFLA_076690	4	1	118	127	3035	2759	0	1	626	865	1017	896		337.834	108.134	367.719	193.537	317.86	337.152	0	1086.92	719.705	420.674	734.745	769.62
CADAFLAG00000452	AFLA_076700	0	0	19	37	470	377	0	0	44	107	69	63		0	0	63.2544	60.2373	52.587	49.2174	0	0	54.0425	55.5925	53.2558	57.8111
CADAFLAG00000453	AFLA_076710	28	14	669	1419	13269	11629	0	3	1243	4441	2200	1607		973.091	622.937	857.853	889.806	571.831	584.749	0	1341.75	588.036	888.715	654.019	567.985
CADAFLAG00000454	AFLA_076720	1	0	109	110	2763	2199	0	0	183	378	291	254		11.8683	0	47.7318	23.5559	40.6636	37.7613	0	0	29.565	25.8326	29.5431	30.6584
CADAFLAG00000455	AFLA_076730	0	0	2	5	40	34	0	0	8	19	5	7		0	0	5.20386	6.36198	3.49783	3.46908	0	0	7.67947	7.71515	3.01611	5.02028
CADAFLAG00000456	AFLA_076740	2	0	11	27	510	367	0	0	52	72	56	35		34.4647	0	6.99404	8.39509	10.898	9.15043	0	0	12.1979	7.14435	8.25476	6.13391
CADAFLAG00000457	AFLA_076750	0	0	15	28	445	373	0	1	47	82	41	41		0	0	37.5699	34.2952	37.4587	36.6352	0	873.602	43.4303	32.0522	23.8075	28.3053
CADAFLAG00000458	AFLA_076760	1	1	54	64	1617	1316	0	0	126	320	212	160		13.8351	17.7134	27.5656	15.9764	27.7413	26.3433	0	0	23.7296	25.4929	25.0894	22.5127
CADAFLAG00000459	AFLA_076770	3	0	33	67	782	717	0	0	88	237	199	143		102.302	0	41.521	41.2244	33.0676	35.3763	0	0	40.849	46.5368	58.048	49.5933
CADAFLAG00000460	AFLA_076780	2	0	26	48	677	599	0	0	55	88	52	57		89.3961	0	42.8798	38.7121	37.5242	38.7388	0	0	33.4648	22.6494	19.8822	25.9113
CADAFLAG00000461	AFLA_076790	0	0	0	0	92	83	0	0	4	6	5	1		0	0	0	0	2.59761	2.73439	0	0	1.23979	0.786663	0.973853	0.231567
CADAFLAG00000462	AFLA_076800	0	0	81	134	2355	2145	0	0	242	220	263	252		0	0	128.07	103.608	125.14	132.994	0	0	141.164	54.2851	96.4051	109.824
CADAFLAG00000463	AFLA_076810	0	0	0	4	173	129	0	0	10	6	10	6		0	0	0	1.3998	4.16074	3.62002	0	0	2.64014	0.670081	1.65906	1.18349
CADAFLAG00000464	AFLA_076820	41	8	341	683	534	462	0	0	106	360	727	596		1002.7	250.493	307.702	301.386	16.1943	16.3478	0	0	35.2881	50.696	152.087	148.237
CADAFLAG00000465	AFLA_076830	0	0	4	18	152	171	0	0	22	34	24	24		0	0	23.0537	50.7316	29.442	38.647	0	0	46.7787	30.5812	32.068	38.1263
CADAFLAG00000466	AFLA_076840	4	5	134	272	2990	2669	0	1	332	764	500	440		207.527	332.127	256.513	254.624	192.362	200.352	0	667.682	234.471	228.241	221.899	232.162
CADAFLAG00000467	AFLA_076850	0	0	9	12	226	198	0	0	24	41	25	21		0	0	13.2892	8.66491	11.2152	11.4647	0	0	13.0741	9.4479	8.5581	8.54692
CADAFLAG00000468	AFLA_076860	0	0	0	5	41	34	0	0	1	9	4	1		0	0	0	2.80635	1.58151	1.53026	0	0	0.42344	1.61207	1.06436	0.316359
CADAFLAG00000469	AFLA_076870	0	1	23	28	631	573	1	0	116	59	63	55		0	31.685	21.0016	12.5029	19.3641	20.5173	580.04	0	39.0777	8.4076	13.3366	13.8427
CADAFLAG00000470	AFLA_076880	10	3	81	257	1671	1388	1	1	148	396	168	146		317.874	122.095	95.0018	147.403	65.8668	63.8376	745.04	409.083	64.0404	72.4831	45.6812	47.1991
CADAFLAG00000471	AFLA_076890	3	8	188	355	10763	9483	0	0	701	1620	1498	1166		60.7818	207.522	140.541	129.777	270.409	277.99	0	0	193.334	188.997	259.619	240.257
CADAFLAG00000472	AFLA_076900	2	0	12	24	222	199	0	0	29	52	28	19		152.914	0	33.8525	33.1091	21.0477	22.0142	0	0	30.1824	22.8933	18.3125	14.774
CADAFLAG00000473	AFLA_076910	6	2	114	228	2510	2273	0	1	332	723	438	400		387.958	165.571	271.975	266.002	201.252	212.649	0	832.125	292.219	269.189	242.259	263.038
CADAFLAG00000474	AFLA_076920	0	1	26	39	661	590	0	0	35	152	86	47		0	18.2882	13.703	10.0515	11.7081	12.1937	0	0	6.80543	12.502	10.508	6.82769
CADAFLAG00000475	AFLA_076930	7	5	81	184	3088	2682	0	2	215	625	347	260		98.6305	90.1994	42.1104	46.7787	53.9541	54.6768	0	362.659	41.2371	50.7083	41.823	37.2573
CADAFLAG00000476	AFLA_076940	3	0	65	148	1175	932	0	2	108	250	147	159		453.964	0	362.915	404.092	220.482	204.055	0	3894.81	222.465	217.835	190.279	244.694
CADAFLAG00000477	AFLA_076950	2	1	53	123	1446	1341	0	0	108	309	165	170		125.774	80.5156	122.978	139.567	112.762	122.017	0	0	92.4529	111.893	88.7597	108.726
CADAFLAG00000478	AFLA_076960	1	0	11	38	444	382	0	0	53	96	55	50		61.5545	0	24.983	42.2047	33.8904	34.0216	0	0	44.4092	34.0265	28.9597	31.3008
CADAFLAG00000479	AFLA_076970	1	1	23	46	233	235	1	0	34	99	54	55		79.3817	101.635	67.3659	65.8864	22.9356	26.9911	1860.57	0	36.7398	45.2524	36.668	44.4026
CADAFLAG00000480	AFLA_076980	3	1	52	119	1196	1033	0	1	107	280	151	113		31.9506	13.6357	20.4339	22.8677	15.7951	15.918	0	137.061	15.5124	17.1712	13.7565	12.2394
CADAFLAG00000481	AFLA_076990	6	0	26	60	261	207	0	1	37	81	23	22		231.812	0	37.0637	41.8266	12.5043	11.5714	0	497.21	19.4591	18.02	7.60123	8.64434
CADAFLAG00000482	AFLA_077000	0	0	0	0	1	5	0	0	0	0	0	0		0	0	0	0	0.300231	1.75155	0	0	0	0	0	0
CADAFLAG00000483	AFLA_077010	1	1	22	38	372	338	0	0	29	87	37	38		86.4694	110.709	70.1902	59.2876	39.8878	42.2874	0	0	34.1348	43.318	27.3676	33.4173
CADAFLAG00000484	AFLA_077020	3	2	118	218	2447	2018	0	0	195	580	334	265		86.9293	74.1986	126.159	113.978	87.9252	84.6053	0	0	76.916	96.7741	82.7873	78.0937
CADAFLAG00000485	AFLA_077030	0	0	7	20	297	208	0	0	30	61	9	9		0	0	6.38093	8.91542	9.09882	7.43514	0	0	10.0891	8.67782	1.90199	2.26132
CADAFLAG00000486	AFLA_077040	19	2	177	284	1621	1380	0	2	240	1346	297	257		1135.85	153.079	390.418	306.338	120.166	119.365	0	1538.69	195.305	463.337	151.878	156.251
CADAFLAG00000487	AFLA_077050	0	0	3	4	114	88	0	0	11	27	14	24		0	0	5.64208	3.67879	7.20553	6.48994	0	0	7.63232	7.92459	6.10418	12.4412
CADAFLAG00000488	AFLA_077060	0	0	2	6	249	175	0	0	9	26	26	33		0	0	2.82104	4.13863	11.8038	9.6796	0	0	4.68347	5.72332	8.50225	12.83
CADAFLAG00000489	AFLA_077070	1	0	4	12	248	206	0	0	17	62	23	26		60.5286	0	8.9333	13.1057	18.6143	18.0409	0	0	14.007	21.6092	11.9086	16.0051
CADAFLAG00000490	AFLA_077080	1	0	15	17	408	268	0	0	32	90	34	37		26.0338	0	14.4085	7.98553	13.1714	10.0949	0	0	11.3403	13.4917	7.57162	9.79635
CADAFLAG00000491	AFLA_077090	0	0	24	66	930	799	0	0	68	147	128	101		0	0	23.4316	31.5109	30.5152	30.5899	0	0	24.4932	22.3977	28.9722	27.1798
CADAFLAG00000492	AFLA_077100	0	0	0	1	30	24	0	0	2	1	4	3		0	0	0	2.56974	5.29819	4.94554	0	0	3.87738	0.820083	4.87308	4.34528
CADAFLAG00000493	AFLA_077110	0	0	0	0	0	0	0	0	0	0	0	0		0	0	0	0	0	0	0	0	0	0	0	0
CADAFLAG00000494	AFLA_077120	0	0	0	0	0	0	0	0	0	0	0	0		0	0	0	0	0	0	0	0	0	0	0	0
CADAFLAG00000495	AFLA_077130	0	0	0	0	0	0	0	0	0	0	0	0		0	0	0	0	0	0	0	0	0	0	0	0
CADAFLAG00000496	AFLA_077140	0	0	0	0	0	0	0	0	0	0	0	0		0	0	0	0	0	0	0	0	0	0	0	0
CADAFLAG00000497	AFLA_077150	0	0	0	0	0	0	0	0	0	0	0	0		0	0	0	0	0	0	0	0	0	0	0	0
CADAFLAG00000498	AFLA_077160	0	0	0	0	0	0	0	0	0	0	0	0		0	0	0	0	0	0	0	0	0	0	0	0
CADAFLAG00000499	AFLA_077170	0	0	0	0	0	0	0	0	0	0	0	0		0	0	0	0	0	0	0	0	0	0	0	0
CADAFLAG00000500	AFLA_077180	0	0	0	0	0	0	0	0	0	0	0	0		0	0	0	0	0	0	0	0	0	0	0	0
CADAFLAG00000501	AFLA_077190	0	0	0	0	0	0	0	0	0	0	0	0		0	0	0	0	0	0	0	0	0	0	0	0
CADAFLAG00000502	AFLA_077200	0	0	0	0	0	0	0	0	0	0	0	0		0	0	0	0	0	0	0	0	0	0	0	0
CADAFLAG00000503	AFLA_077210	0	0	0	0	0	0	0	0	0	0	0	0		0	0	0	0	0	0	0	0	0	0	0	0
CADAFLAG00000504	AFLA_077220	0	0	0	0	0	0	0	0	0	0	0	0		0	0	0	0	0	0	0	0	0	0	0	0
CADAFLAG00000505	AFLA_077230	0	0	0	0	26	24	0	0	2	0	2	0		0	0	0	0	5.38344	5.79823	0	0	4.5459	0	2.85664	0
CADAFLAG00000506	AFLA_077240	0	1	17	41	343	305	0	0	37	98	62	28		0	81.9344	40.1408	47.3421	27.2191	28.2408	0	0	32.2318	36.1126	33.9398	18.2234
CADAFLAG00000507	AFLA_077250	0	1	163	251	2399	1895	0	0	421	1000	554	437		0	26.7613	125.709	94.6626	62.1801	57.3096	0	0	119.786	120.357	99.0533	92.8953
CADAFLAG00000508	AFLA_077260	0	0	6	13	159	131	0	0	8	62	29	16		0	0	9.77504	10.3571	8.70577	8.36909	0	0	4.80843	15.7635	10.9533	7.1849
CADAFLAG00000509	AFLA_077270	7	2	36	72	397	326	0	0	50	233	91	74		241.539	88.3568	45.8335	44.827	16.9869	16.2757	0	0	23.4853	46.2948	26.8598	25.9685
CADAFLAG00000510	AFLA_077280	0	0	13	30	493	424	0	0	40	226	117	87		0	0	10.9216	12.3251	13.9198	13.9685	0	0	12.3979	29.631	22.7882	20.1463
CADAFLAG00000511	AFLA_077290	0	0	20	36	923	815	0	0	37	77	57	41		0	0	36.0941	31.7713	55.9824	57.6772	0	0	24.6351	21.6866	23.8486	20.395
CADAFLAG00000512	AFLA_077300	0	0	2	10	202	179	0	0	7	22	21	17		0	0	1.76026	4.304	5.97503	6.17787	0	0	2.27295	3.02178	4.28495	4.12409
CADAFLAG00000513	AFLA_077310	0	0	0	0	0	0	0	0	0	0	0	0		0	0	0	0	0	0	0	0	0	0	0	0
CADAFLAG00000514	AFLA_077320	0	0	0	0	6	3	0	0	1	1	0	1		0	0	0	0	0.78321	0.456925	0	0	1.43295	0.606148	0	1.07058
CADAFLAG00000515	AFLA_077330	0	0	0	1	15	9	0	0	2	0	1	1		0	0	0	1.55097	1.59886	1.11933	0	0	2.3402	0	0.735288	0.874199
CADAFLAG00000516	AFLA_077340	0	0	0	0	8	3	0	0	0	0	0	0		0	0	0	0	1.22128	0.53437	0	0	0	0	0	0
CADAFLAG00000517	AFLA_077350	0	0	0	0	0	1	0	0	0	0	0	0		0	0	0	0	0	0.108904	0	0	0	0	0	0
CADAFLAG00000518	AFLA_077360	0	0	7	5	32	24	0	0	3	10	7	2		0	0	7.0926	2.47744	1.08968	0.953583	0	0	1.12144	1.58126	1.64432	0.558562
CADAFLAG00000519	AFLA_077370	0	0	1	0	0	0	0	0	0	0	0	0		0	0	4.24273	0	0	0	0	0	0	0	0	0
CADAFLAG00000520	AFLA_077380	0	0	0	0	1	0	0	0	0	0	0	0		0	0	0	0	0.0426868	0	0	0	0	0	0	0
CADAFLAG00000521	AFLA_077390	0	0	2	2	52	49	0	0	5	4	4	7		0	0	1.87412	0.916481	1.63762	1.80054	0	0	1.72855	0.584954	0.868976	1.808
CADAFLAG00000522	AFLA_077400	0	0	0	0	0	3	0	0	0	0	0	0		0	0	0	0	0	0.151576	0	0	0	0	0	0
CADAFLAG00000523	AFLA_077410	0	0	13	16	85	108	0	0	12	39	18	12		0	0	15.5883	9.38214	3.42545	5.07831	0	0	5.30863	7.29819	5.0039	3.96616
CADAFLAG00000524	AFLA_077420	0	0	2	3	20	40	0	0	6	13	8	7		0	0	2.55846	1.87671	0.859849	2.00655	0	0	2.83169	2.5953	2.37258	2.4682
CADAFLAG00000525	AFLA_077430	0	0	1	9	62	55	0	0	5	8	8	3		0	0	1.50139	6.6079	3.12845	3.23815	0	0	2.76956	1.87448	2.78462	1.24151
CADAFLAG00000526	AFLA_077440	3	0	8	16	64	69	0	0	2	16	16	9		121.733	0	11.9776	11.7146	3.22035	4.05106	0	0	1.10473	3.73848	5.55368	3.71412
CADAFLAG00000527	AFLA_077450	0	0	7	13	65	48	0	0	11	53	15	17		0	0	11.0029	9.99259	3.43372	2.95863	0	0	6.37892	13.0011	5.46614	7.36532
CADAFLAG00000528	AFLA_077460	0	0	4	3	121	80	0	0	14	15	9	12		0	0	1.98702	0.728768	2.02009	1.55837	0	0	2.56576	1.16286	1.03649	1.64307
CADAFLAG00000529	AFLA_077470	0	0	6	17	276	249	0	0	25	32	14	22		0	0	4.40546	6.10401	6.81071	7.16935	0	0	6.77214	3.66678	2.38314	4.45243
CADAFLAG00000530	AFLA_077480	0	0	13	44	5617	4967	0	0	141	379	390	351		0	0	60.5911	100.287	879.858	907.819	0	0	242.454	275.676	421.416	450.927
CADAFLAG00000531	AFLA_077490	0	0	0	3	26	18	0	0	1	6	1	3		0	0	0	4.13863	2.46505	1.99123	0	0	1.04077	2.64153	0.654019	2.33273
CADAFLAG00000532	AFLA_077500	0	1	2	0	34	34	0	0	2	10	6	3		0	153.712	8.85947	0	5.06174	5.90604	0	0	3.26854	6.9131	6.16183	3.66297
CADAFLAG00000533	AFLA_077510	3	0	13	23	353	282	0	0	8	201	45	20		108.951	0	17.4199	15.0715	15.8972	14.8181	0	0	3.95493	42.0334	13.9797	7.38698
CADAFLAG00000534	AFLA_077520	0	1	2	8	206	137	0	0	4	57	15	6		0	56.361	3.24847	6.35427	11.245	8.72589	0	0	2.39693	14.4484	5.64835	2.68617
CADAFLAG00000535	AFLA_077530	0	0	0	0	1	0	0	0	0	0	0	1		0	0	0	0	0.195803	0	0	0	0	0	0	1.60587
CADAFLAG00000536	AFLA_077540	0	1	4	8	177	135	0	0	11	17	12	10		0	344.428	39.7035	38.8316	59.0453	52.5464	0	0	40.2817	26.3338	27.6141	27.3592
CADAFLAG00000537	AFLA_077550	0	0	1	0	109	97	0	0	5	7	10	8		0	0	5.89009	0	21.577	22.4044	0	0	10.8652	6.4345	13.6553	12.9881
CADAFLAG00000538	AFLA_077560	1	1	78	147	3163	2554	0	0	173	340	140	104		27.153	34.7647	78.1455	72.02	106.5	100.339	0	0	63.9442	53.1598	32.5176	28.7195
CADAFLAG00000539	AFLA_077570	0	0	0	0	0	0	0	0	0	0	0	0		0	0	0	0	0	0	0	0	0	0	0	0
CADAFLAG00000540	AFLA_077580	0	0	1	2	44	48	0	0	3	6	2	2		0	0	1.44474	1.41301	2.13641	2.71938	0	0	1.59903	1.35281	0.669885	0.79644
CADAFLAG00000541	AFLA_077590	1	1	68	161	539	396	0	0	82	63	108	80		30.5186	39.0738	76.5711	88.656	20.398	17.486	0	0	34.0656	11.0711	28.1943	24.8302
CADAFLAG00000542	AFLA_077600	0	0	0	2	188	140	0	0	80	21	41	57		0	0	0	2.1397	13.8229	12.0106	0	0	64.5703	7.16987	20.7951	34.3721
CADAFLAG00000543	AFLA_077610	0	0	0	1	31	27	0	0	8	3	11	11		0	0	0	0.518011	1.10361	1.12154	0	0	3.12643	0.495939	2.70138	3.21173
CADAFLAG00000544	AFLA_077620	0	0	0	0	0	7	0	0	2	0	1	3		0	0	0	0	0	1.65315	0	0	4.44374	0	1.39622	4.97999
CADAFLAG00000545	AFLA_077630	0	0	0	0	1	4	0	0	0	0	1	1		0	0	0	0	0.0973721	0.454455	0	0	0	0	0.671695	0.798592
CADAFLAG00000546	AFLA_077640	0	0	0	0	23	16	0	0	1	0	1	1		0	0	0	0	2.72578	2.21248	0	0	1.30096	0	0.817524	0.971971
CADAFLAG00000547	AFLA_077650	0	0	0	1	29	29	0	0	1	4	5	2		0	0	0	0.4304	0.857802	1.00088	0	0	0.324707	0.549415	1.02023	0.485188
CADAFLAG00000548	AFLA_077660	0	0	1	2	3	1	0	0	2	0	0	1		0	0	4.62067	4.5192	0.465875	0.181195	0	0	3.40942	0	0	1.27362
CADAFLAG00000549	AFLA_077670	0	0	4	1	14	11	0	0	1	10	4	4		0	0	6.43841	0.787127	0.757338	0.694307	0	0	0.593833	2.51197	1.49266	1.77465
CADAFLAG00000550	AFLA_077680	0	0	1	2	6	4	0	0	0	10	5	2		0	0	2.89729	2.83366	0.584232	0.454455	0	0	0	4.52154	3.35848	1.59718
CADAFLAG00000551	AFLA_077690	0	0	0	0	0	0	0	0	0	0	0	0		0	0	0	0	0	0	0	0	0	0	0	0
CADAFLAG00000552	AFLA_077700	0	0	0	0	1	0	0	0	0	0	0	0		0	0	0	0	0.118512	0	0	0	0	0	0	0
CADAFLAG00000553	AFLA_077710	0	0	3	9	16	25	0	0	0	30	21	14		0	0	3.5973	5.27745	0.64479	1.17554	0	0	0	5.61399	5.83789	4.62719
CADAFLAG00000554	AFLA_077720	0	0	0	2	2	2	0	0	0	0	0	1		0	0	0	2.91237	0.200154	0.23354	0	0	0	0	0	0.820776
CADAFLAG00000555	AFLA_077730	0	0	1	1	6	8	0	0	2	10	4	4		0	0	1.9007	0.92948	0.383273	0.596271	0	0	1.40246	2.96626	1.7626	2.0956
CADAFLAG00000556	AFLA_077740	0	0	2	9	18	14	0	0	3	19	16	10		0	0	2.47004	5.43553	0.747118	0.678018	0	0	1.36691	3.66203	4.58115	3.40414
CADAFLAG00000557	AFLA_077750	0	0	0	1	2	1	0	0	0	1	2	0		0	0	0	0.539328	0.074131	0.0432481	0	0	0	0.172116	0.511373	0
CADAFLAG00000558	AFLA_077760	0	0	0	0	2	1	0	0	0	0	0	0		0	0	0	0	0.295309	0.172283	0	0	0	0	0	0
CADAFLAG00000559	AFLA_077770	0	0	0	0	5	6	0	0	1	0	1	0		0	0	0	0	0.161414	0.226006	0	0	0.354384	0	0.222695	0
CADAFLAG00000560	AFLA_077780	0	0	1	5	26	13	0	0	1	1	0	5		0	0	2.16128	5.28455	1.88855	1.10178	0	0	0.797365	0.337292	0	2.97862
CADAFLAG00000561	AFLA_077790	0	0	4	4	204	154	0	0	14	16	24	14		0	0	10.7919	5.27745	18.4974	16.2929	0	0	13.9352	6.73679	15.0117	10.4112
CADAFLAG00000562	AFLA_077800	0	0	0	1	22	23	0	0	1	5	1	1		0	0	0	0.764179	1.15541	1.40941	0	0	0.57652	1.21937	0.362285	0.430728
CADAFLAG00000563	AFLA_077810	4	8	8	3	44	39	0	0	9	14	5	3		148.993	381.52	10.9948	2.01626	2.03233	2.10186	0	0	4.56338	3.00277	1.59312	1.13646
CADAFLAG00000564	AFLA_077820	0	0	0	1	1	1	0	0	0	1	0	1		0	0	0	2.18428	0.150115	0.175155	0	0	0	0.69707	0	1.23116
CADAFLAG00000565	AFLA_077830	0	0	24	27	733	649	0	0	56	161	79	88		0	0	20.9852	11.545	21.5402	22.2529	0	0	18.0649	21.9697	16.0144	21.2089
CADAFLAG00000566	AFLA_077840	91	36	1928	5699	16767	15088	1	0	2545	13254	4511	3799		3592.24	1819.48	2808.16	4059.2	820.755	861.761	925.227	0	1367.57	3012.71	1523.24	1525.17
CADAFLAG00000567	AFLA_077850	0	1	18	34	529	502	0	0	56	80	66	51		0	33.7552	17.5099	16.174	17.2946	19.1494	0	0	20.0976	12.145	14.8846	13.6746
CADAFLAG00000568	AFLA_077860	2	2	128	223	7721	6754	0	0	536	864	1067	910		66.9441	85.7102	158.082	134.68	320.472	327.095	0	0	244.221	166.526	305.505	309.777
CADAFLAG00000569	AFLA_077870	7	4	45	87	123	111	0	0	28	471	141	104		186.927	136.758	44.3381	41.9189	4.07298	4.28871	0	0	10.1781	72.4236	32.208	28.2443
CADAFLAG00000570	AFLA_077880	0	1	25	31	1101	883	0	0	68	67	63	48		0	20.7579	14.9553	9.06866	22.1353	20.7136	0	0	15.0075	6.25496	8.73729	7.91462
CADAFLAG00000571	AFLA_077890	0	0	0	0	0	0	0	0	0	0	0	0		0	0	0	0	0	0	0	0	0	0	0	0
CADAFLAG00000572	AFLA_077900	0	0	0	0	3	6	0	0	0	0	1	0		0	0	0	0	0.264909	0.618193	0	0	0	0	0.609135	0
CADAFLAG00000573	AFLA_077910	0	2	0	0	7	12	0	0	2	9	0	2		0	78.6432	0	0	0.26659	0.533241	0	0	0.836137	1.59162	0	0.624692
CADAFLAG00000574	AFLA_077920	0	0	0	1	51	52	0	0	5	3	11	6		0	0	0	0.477438	1.67342	1.99083	0	0	1.80097	0.457095	2.4898	1.61464
CADAFLAG00000575	AFLA_077930	0	0	0	0	14	16	0	0	1	0	3	1		0	0	0	0	1.48641	1.9821	0	0	1.1655	0	2.1972	0.870764
CADAFLAG00000576	AFLA_077940	0	0	0	0	0	0	0	0	0	0	0	0		0	0	0	0	0	0	0	0	0	0	0	0
CADAFLAG00000577	AFLA_077950	0	0	6	10	26	19	0	1	6	19	3	3		0	0	7.73074	6.3008	1.12586	0.959983	0	449.401	2.85211	3.82048	0.896132	1.06543
CADAFLAG00000578	AFLA_077960	0	0	2	1	140	125	0	0	9	13	7	7		0	0	5.49741	1.34417	12.933	13.4734	0	0	9.12676	5.57656	4.46075	5.30347
CADAFLAG00000579	AFLA_077970	0	1	4	8	33	34	0	0	1	12	11	14		0	44.3893	5.11692	5.00455	1.41875	1.70556	0	0	0.471949	2.39566	3.26229	4.93641
CADAFLAG00000580	AFLA_077980	0	0	0	0	5	6	0	0	3	5	1	2		0	0	0	0	0.709206	0.993003	0	0	4.67118	3.29325	0.978454	2.32661
CADAFLAG00000581	AFLA_077990	1	1	9	17	242	222	0	0	20	32	27	14		41.6242	53.2926	13.8223	12.7677	12.491	13.37	0	0	11.3322	7.66977	9.61352	5.92652
CADAFLAG00000582	AFLA_078000	0	0	1	3	197	191	0	0	7	8	12	10		0	0	3.48051	5.10611	23.0437	26.0685	0	0	8.98848	4.34537	9.68288	9.59348
CADAFLAG00000583	AFLA_078010	0	0	0	0	0	0	0	0	0	0	0	0		0	0	0	0	0	0	0	0	0	0	0	0
CADAFLAG00000584	AFLA_078020	0	0	0	0	0	0	0	0	0	0	0	0		0	0	0	0	0	0	0	0	0	0	0	0
CADAFLAG00000585	AFLA_078030	0	0	0	0	1	1	0	0	0	1	1	0		0	0	0	0	0.0385735	0.0450076	0	0	0	0.179119	0.266089	0
CADAFLAG00000586	AFLA_078040	0	0	16	11	156	145	0	0	26	33	25	21		0	0	40.6444	13.6647	13.3183	14.444	0	0	24.3669	13.0825	14.7232	14.7039
CADAFLAG00000587	AFLA_078050	0	0	0	0	0	0	0	0	0	0	0	0		0	0	0	0	0	0	0	0	0	0	0	0
CADAFLAG00000588	AFLA_078060	0	0	0	0	0	2	0	0	0	0	0	0		0	0	0	0	0	0.0824257	0	0	0	0	0	0
CADAFLAG00000589	AFLA_078070	0	0	0	0	0	0	0	0	0	0	0	0		0	0	0	0	0	0	0	0	0	0	0	0
CADAFLAG00000590	AFLA_078080	0	0	0	0	7	11	0	0	3	0	0	1		0	0	0	0	0.447152	0.819873	0	0	2.10369	0	0	0.523899
CADAFLAG00000591	AFLA_078090	0	0	0	5	60	53	0	0	6	22	10	5		0	0	0	4.05748	3.34622	3.44887	0	0	3.67331	5.69742	3.84717	2.28699
CADAFLAG00000592	AFLA_078100	0	1	3	3	30	20	0	0	0	7	1	2		0	87.7317	7.58488	3.70915	2.54913	1.98288	0	0	0	2.76198	0.586149	1.39377
CADAFLAG00000593	AFLA_078110	0	0	0	2	32	17	0	0	10	2	5	1		0	0	0	1.39052	1.52903	0.947787	0	0	5.24526	0.443758	1.64806	0.391882
CADAFLAG00000594	AFLA_078120	1	1	5	0	13	9	0	0	4	2	2	4		42.4762	54.3834	7.83623	0	0.684736	0.55312	0	0	2.31282	0.489172	0.726688	1.72795
CADAFLAG00000595	AFLA_078130	0	0	0	0	1	0	0	0	1	1	0	0		0	0	0	0	0.0412216	0	0	0	0.452509	0.191415	0	0
CADAFLAG00000596	AFLA_078140	0	0	1	0	11	13	0	0	0	0	1	1		0	0	2.22406	0	0.822208	1.13378	0	0	0	0	0.515617	0.613027
CADAFLAG00000597	AFLA_078150	0	0	0	0	1	2	0	0	0	0	0	0		0	0	0	0	0.193697	0.452012	0	0	0	0	0	0
CADAFLAG00000598	AFLA_078160	0	0	0	0	0	0	0	0	0	0	0	0		0	0	0	0	0	0	0	0	0	0	0	0
CADAFLAG00000599	AFLA_078170	0	0	0	0	2	1	0	0	1	0	0	0		0	0	0	0	0.321676	0.187666	0	0	1.76559	0	0	0
CADAFLAG00000600	AFLA_078180	0	0	0	0	8	9	0	0	0	0	1	0		0	0	0	0	0.852726	1.11933	0	0	0	0	0.735288	0
CADAFLAG00000601	AFLA_078190	2	0	7	31	302	261	0	0	33	54	38	33		67.41	0	8.7053	18.8527	12.6222	12.7282	0	0	15.1407	10.4803	10.956	11.3118
CADAFLAG00000602	AFLA_078200	0	0	0	1	19	15	0	0	0	1	2	1		0	0	0	1.7953	2.34427	2.15944	0	0	0	0.572935	1.70224	1.01192
CADAFLAG00000603	AFLA_078210	0	0	4	6	1747	1480	0	0	313	186	417	398		0	0	6.17865	4.53222	90.6921	89.6469	0	0	178.371	44.8375	149.331	169.453
CADAFLAG00000604	AFLA_078220	3	4	59	142	875	709	0	0	111	194	109	102		125.592	214.399	91.1351	107.263	45.4239	42.9457	0	0	63.2561	46.766	39.0338	43.4278
CADAFLAG00000605	AFLA_078230	2	0	13	53	337	339	0	0	40	97	52	50		115.293	0	27.6507	55.127	24.0899	28.275	0	0	31.3883	32.198	25.6417	29.3134
CADAFLAG00000606	AFLA_078240	0	1	5	2	29	26	0	1	3	12	5	7		0	67.1448	9.67505	1.89252	1.88592	1.97286	0	674.913	2.14166	3.62376	2.24303	3.73349
CADAFLAG00000607	AFLA_078250	0	1	26	56	374	294	0	0	49	168	112	64		0	16.5473	12.3985	13.059	5.99393	5.49774	0	0	8.62062	12.5026	12.3821	8.41222
CADAFLAG00000608	AFLA_078260	1	0	13	24	474	385	0	0	47	97	91	80		51.3317	0	24.6218	22.2287	30.1716	28.5942	0	0	32.8413	28.671	39.9576	41.7638
CADAFLAG00000609	AFLA_078270	2	2	151	256	5299	4301	1	0	436	872	747	504		23.022	29.4756	64.1329	53.1704	75.6381	71.633	269.797	0	68.3181	57.7983	73.5538	59.0022
CADAFLAG00000610	AFLA_078280	0	0	50	64	2220	1735	2	0	144	278	200	146		0	0	33.9239	21.2345	50.6212	46.161	861.984	0	36.0449	29.4358	31.4591	27.3038
CADAFLAG00000611	AFLA_078290	3	2	59	108	1427	1036	0	0	98	329	164	113		34.5329	29.4756	25.0585	22.4313	20.369	17.2545	0	0	15.3559	21.8069	16.1484	13.2287
CADAFLAG00000612	AFLA_078300	1	0	40	69	1158	910	1	0	106	233	176	119		21.084	0	31.1174	26.2494	30.2758	27.7604	494.171	0	30.4225	28.2875	31.7422	25.5167
CADAFLAG00000613	AFLA_078310	5	2	116	316	1688	1614	1	0	288	1257	335	301		1171.52	599.971	1002.83	1335.93	490.441	547.161	5491.67	0	918.564	1695.91	671.424	717.252
CADAFLAG00000614	AFLA_078320	38	33	437	1212	5942	5008	0	4	703	2914	1133	807		915.457	1017.86	388.443	526.835	177.509	174.562	0	1240.14	230.54	404.232	233.484	197.721
CADAFLAG00000615	AFLA_078330	0	3	309	233	1218	1145	0	0	232	1500	51	51		0	296.794	880.975	324.853	116.707	128.012	0	0	244.028	667.408	33.7098	40.0783
CADAFLAG00000616	AFLA_078340	0	0	0	0	1	3	0	0	0	0	0	0		0	0	0	0	0.132455	0.463645	0	0	0	0	0	0
CADAFLAG00000617	AFLA_078350	0	0	0	0	0	1	0	0	0	2	0	1		0	0	0	0	0	0.0686881	0	0	0	0.546722	0	0.482809
CADAFLAG00000618	AFLA_078360	0	0	2	7	60	57	0	1	4	10	1	3		0	0	5.25488	8.99409	5.29819	5.87283	0	916.426	3.87738	4.10041	0.609135	2.17264
CADAFLAG00000619	AFLA_078370	0	0	0	3	161	106	0	0	27	6	15	12		0	0	0	2.78844	10.2845	7.9006	0	0	18.9332	1.77975	6.60977	6.28679
CADAFLAG00000620	AFLA_078380	5	16	101	228	2041	1810	1	1	458	1101	910	740		138.088	565.753	102.92	113.616	69.8978	72.3262	647.307	355.42	172.182	175.089	214.981	207.847
CADAFLAG00000621	AFLA_078390	9	4	64	154	2066	1586	0	0	204	426	312	216		82.1758	46.7608	21.5612	25.3711	23.3919	20.9525	0	0	25.3553	22.3974	24.3685	20.0577
CADAFLAG00000622	AFLA_078400	5	5	208	355	6583	5663	1	0	585	1260	1047	831		78.4105	100.391	120.354	100.45	128.016	128.494	367.56	0	124.881	113.779	140.451	132.535
CADAFLAG00000623	AFLA_078410	0	0	38	62	1325	1154	0	0	130	294	245	178		0	0	60.4389	48.2227	70.8259	71.9746	0	0	76.282	72.9752	90.34	78.0346
CADAFLAG00000624	AFLA_078420	2	5	1794	4234	57691	47822	0	2	5155	13806	9573	7496		45.8261	146.681	1516.69	1750.45	1639.17	1585.41	0	589.75	1607.86	1821.53	1876.3	1746.78
CADAFLAG00000625	AFLA_078430	0	2	4	6	117	127	0	0	10	42	30	29		0	76.2259	4.39343	3.22271	4.31889	5.47	0	0	4.05218	7.19925	7.63916	8.77961
CADAFLAG00000626	AFLA_078440	0	0	0	0	0	2	0	0	0	1	0	0		0	0	0	0	0	0.119764	0	0	0	0.238315	0	0
CADAFLAG00000627	AFLA_078450	1	1	28	47	1390	1237	0	0	90	203	176	144		34.8366	44.6022	35.9903	29.5428	60.0461	62.35	0	0	42.6791	40.721	52.447	51.018
CADAFLAG00000628	AFLA_078460	2	3	45	92	1080	1049	0	0	144	272	202	190		77.4766	148.793	64.3197	64.3052	51.8798	58.7959	0	0	75.9346	60.673	66.9367	74.8547
CADAFLAG00000629	AFLA_078470	0	1	13	32	780	577	0	1	65	120	95	80		0	39.4886	14.794	17.8081	29.8318	25.7489	0	396.923	27.2899	21.3117	25.0638	25.0938
CADAFLAG00000630	AFLA_078480	1	2	37	40	1757	1599	0	0	107	196	176	146		30.5186	78.1475	41.6637	22.0263	66.4922	70.6065	0	0	44.4514	34.4435	45.9462	45.3151
CADAFLAG00000631	AFLA_078490	0	0	0	1	4	9	0	0	0	0	0	0		0	0	0	4.59848	1.26413	3.31872	0	0	0	0	0	0
CADAFLAG00000632	AFLA_078500	4	2	198	210	6775	5024	0	0	406	754	911	665		91.6521	58.6723	167.394	86.8199	192.498	166.557	0	0	126.633	99.481	178.555	154.963
CADAFLAG00000633	AFLA_078510	1	3	24	41	881	740	0	0	88	161	124	126		26.6711	102.443	23.618	19.7307	29.1374	28.5564	0	0	31.9492	24.726	28.2901	34.1772
CADAFLAG00000634	AFLA_078520	11	15	365	873	8507	7578	0	2	735	2389	1246	1052		424.612	741.329	519.856	608.038	407.202	423.238	0	993.539	386.21	531.008	411.424	412.99
CADAFLAG00000635	AFLA_078530	0	1	14	21	345	319	0	0	28	49	38	17		0	33.7552	13.6188	9.9898	11.2791	12.1686	0	0	10.0488	7.43879	8.56991	4.55821
CADAFLAG00000636	AFLA_078540	0	0	6	10	89	81	0	0	18	17	7	13		0	0	10.242	8.34756	5.10583	5.42199	0	0	11.3358	4.52874	2.77021	6.11661
CADAFLAG00000637	AFLA_078550	0	0	0	0	9	6	0	0	1	0	0	1		0	0	0	0	1.1181	0.869734	0	0	1.36377	0	0	1.01889
CADAFLAG00000638	AFLA_078560	0	0	0	0	2	2	0	0	1	2	0	0		0	0	0	0	0.259192	0.302425	0	0	1.42264	1.20357	0	0
CADAFLAG00000639	AFLA_078570	0	0	1	2	94	70	0	0	11	9	7	13		0	0	0.427431	0.418044	1.35032	1.17329	0	0	1.73462	0.600348	0.693657	1.53159
CADAFLAG00000640	AFLA_078580	0	1	54	87	2076	1728	0	0	169	312	251	222		0	38.2698	59.5553	46.9215	76.948	74.7327	0	0	68.7637	53.7002	64.1773	67.486
CADAFLAG00000641	AFLA_078590	0	0	2	5	125	140	0	0	40	41	28	17		0	0	5.17872	6.33124	10.8779	14.2155	0	0	38.2119	16.5681	16.8086	12.1332
CADAFLAG00000642	AFLA_078600	1	0	26	83	1368	1194	0	0	108	257	173	164		14.1864	0	13.6093	21.2455	24.0654	24.508	0	0	20.8561	20.9938	20.9938	23.6614
CADAFLAG00000643	AFLA_078610	0	0	27	23	1372	1251	0	0	151	153	232	204		0	0	45.272	18.859	77.3148	82.2551	0	0	93.4089	40.0361	90.1851	94.2822
CADAFLAG00000644	AFLA_078620	3	0	33	77	1185	1023	0	0	115	209	143	150		155.645	0	63.1712	72.0812	76.2371	76.7928	0	0	81.2173	62.4376	63.4632	79.1462
CADAFLAG00000645	AFLA_078630	1	1	20	51	556	521	0	0	56	146	77	56		78.1014	99.9952	57.6342	71.8698	53.8478	58.8746	0	0	59.5366	65.6595	51.4425	44.4807
CADAFLAG00000646	AFLA_078640	4	0	33	60	1246	1035	0	0	69	173	95	107		173.455	0	52.7998	46.9457	67.0007	64.938	0	0	40.7299	43.1976	35.2389	47.1885
CADAFLAG00000647	AFLA_078650	69	85	1585	3584	33553	28677	6	6	2966	10772	5233	4142		1429.21	2254.17	1211.35	1339.47	861.813	859.434	2912.88	1599.39	836.287	1284.78	927.193	872.534
CADAFLAG00000648	AFLA_078660	2	0	43	103	1684	1399	0	0	112	280	182	124		152.914	0	121.305	142.093	159.659	154.763	0	0	116.566	123.271	119.031	96.4195
CADAFLAG00000649	AFLA_078670	6	1	20	45	386	347	0	0	43	131	72	56		453.964	96.8704	55.8331	61.4328	36.2153	37.9867	0	0	44.287	57.0726	46.5989	43.0907
CADAFLAG00000650	AFLA_078680	2	4	48	140	1209	1149	0	0	117	436	176	117		56.9681	145.875	50.4469	71.9527	42.7034	47.3536	0	0	45.3654	71.5112	42.8831	33.8932
CADAFLAG00000651	AFLA_078690	0	1	51	82	2546	2464	0	0	131	357	277	195		0	17.8494	26.2341	20.627	44.0146	49.7023	0	0	24.8606	28.6588	33.0336	27.648
CADAFLAG00000652	AFLA_078700	1	2	44	43	1864	1519	0	0	120	263	177	133		19.1647	49.0742	31.1133	14.8692	44.2979	42.1203	0	0	31.3055	29.0231	29.0167	25.9226
CADAFLAG00000653	AFLA_078710	0	0	12	26	340	308	0	0	34	63	40	36		0	0	22.5948	23.9401	21.5154	22.7414	0	0	23.6184	18.5124	17.4609	18.6837
CADAFLAG00000654	AFLA_078720	2	0	160	284	4772	4023	0	0	352	960	659	514		43.9542	0	129.742	112.618	130.048	127.924	0	0	105.305	121.486	123.888	114.884
CADAFLAG00000655	AFLA_078730	0	0	0	1	8	9	0	0	2	0	0	0		0	0	0	2.38285	1.3101	1.7197	0	0	3.59539	0	0	0
CADAFLAG00000656	AFLA_078740	0	1	30	63	1126	897	0	0	80	246	153	129		0	30.9469	26.7553	27.4761	33.7497	31.3705	0	0	26.3223	34.2388	31.6345	31.7112
CADAFLAG00000657	AFLA_078750	0	0	12	36	243	213	0	0	27	84	27	24		0	0	12.7619	18.7224	8.68524	8.88285	0	0	10.5936	13.9414	6.65698	7.03522
CADAFLAG00000658	AFLA_078760	0	0	18	47	439	405	1	0	43	116	64	76		0	0	20.0999	25.6653	16.4752	17.7344	709.341	0	17.7148	20.215	16.5685	23.3921
CADAFLAG00000659	AFLA_078770	0	1	25	41	407	365	0	0	62	85	54	61		0	32.8606	23.6748	18.987	12.9534	13.5544	0	0	21.6613	12.562	11.8555	15.9225
CADAFLAG00000660	AFLA_078780	0	1	26	49	664	583	0	0	89	163	122	100		0	33.8782	25.3842	23.3945	21.7872	22.3203	0	0	32.0573	24.8355	27.6141	26.9107
CADAFLAG00000661	AFLA_078790	5	1	197	422	4943	4058	0	0	501	1147	782	670		260.338	66.6635	378.464	396.458	319.148	305.711	0	0	355.093	343.888	348.294	354.787
CADAFLAG00000662	AFLA_078800	4	2	173	346	5308	4372	0	0	515	1263	756	544		142.42	91.1721	227.274	222.282	234.356	225.228	0	0	249.606	258.941	230.253	196.986
CADAFLAG00000663	AFLA_078810	2	0	90	144	765	604	0	0	84	544	116	99		48.6662	0	80.8037	63.2233	23.0831	21.265	0	0	27.8236	76.2224	24.145	24.4995
CADAFLAG00000664	AFLA_078820	0	0	14	8	370	311	0	0	99	55	140	101		0	0	30.1364	8.42132	26.7675	26.2521	0	0	78.6221	18.4766	69.8671	59.9265
CADAFLAG00000665	AFLA_078830	1	0	3	10	71	56	0	0	10	12	7	5		77.2705	0	8.55316	13.9422	6.8031	6.26085	0	0	10.5184	5.33926	4.62684	3.92924
CADAFLAG00000666	AFLA_078840	0	0	12	24	320	266	0	0	30	56	43	39		0	0	14.9929	14.6637	13.4369	13.0325	0	0	13.8284	10.9191	12.4553	13.4309
CADAFLAG00000667	AFLA_078850	0	0	4	1	145	113	0	0	2	14	9	8		0	0	4.43891	0.542678	5.40788	4.91739	0	0	0.818826	2.42459	2.31547	2.44703
CADAFLAG00000668	AFLA_078860	0	0	0	0	0	1	0	0	0	0	0	0		0	0	0	0	0	0.247277	0	0	0	0	0	0
CADAFLAG00000669	AFLA_078870	0	0	0	0	0	1	0	0	0	1	0	0		0	0	0	0	0	0.149068	0	0	0	0.593251	0	0
CADAFLAG00000670	AFLA_078880	0	1	15	41	539	421	0	0	40	93	54	41		0	29.9021	12.926	17.2776	15.6101	14.2264	0	0	12.7168	12.5069	10.7882	9.73846
CADAFLAG00000671	AFLA_078890	0	2	32	81	1003	826	0	0	72	374	240	216		0	117.345	54.107	66.9754	56.9965	54.7676	0	0	44.914	98.6893	94.0797	100.668
CADAFLAG00000672	AFLA_078900	3	1	88	149	1281	1100	0	1	170	413	221	166		72.5134	30.9469	78.4822	64.9832	38.3955	38.4699	0	311.066	55.9349	57.4822	45.6943	40.8066
CADAFLAG00000673	AFLA_078910	0	0	0	0	1	0	0	0	0	0	0	0		0	0	0	0	0.183192	0	0	0	0	0	0	0
CADAFLAG00000674	AFLA_078920	5	2	102	58	565	496	0	1	100	259	81	85		83.4238	42.7238	62.793	17.4608	11.6897	11.9738	0	214.721	22.7121	24.8832	11.5605	14.4233
CADAFLAG00000675	AFLA_078930	0	0	2	2	191	116	0	0	10	13	17	7		0	0	3.08932	1.51074	9.9154	7.02638	0	0	5.69875	3.1338	6.08784	2.98034
CADAFLAG00000676	AFLA_078940	0	0	1	0	33	17	0	0	3	5	4	2		0	0	7.24321	0	8.0332	4.82859	0	0	8.01675	5.65192	6.71695	3.99296
CADAFLAG00000677	AFLA_078950	1	0	16	21	522	461	0	0	36	104	58	52		23.2802	0	13.7435	8.82113	15.0693	15.5281	0	0	11.4085	13.9414	11.5501	12.3116
CADAFLAG00000678	AFLA_078960	2	3	79	165	1734	1614	0	0	164	405	245	237		140.583	269.987	204.89	209.268	151.142	164.148	0	0	156.921	163.924	147.313	169.424
CADAFLAG00000679	AFLA_078970	0	1	57	114	1878	1568	1	0	145	346	240	195		0	14.4068	23.6653	23.1456	26.2045	25.5284	263.736	0	22.2101	22.4186	23.1009	22.3154
CADAFLAG00000680	AFLA_078980	5	0	43	80	598	488	1	0	46	191	65	69		170.503	0	54.1031	49.2232	25.287	24.0776	799.257	0	21.3529	37.5044	18.9604	23.9297
CADAFLAG00000681	AFLA_078990	1	0	50	38	356	324	0	0	56	125	65	53		25.7568	0	47.5175	17.6601	11.3704	12.0745	0	0	19.6344	18.5391	14.3212	13.8833
CADAFLAG00000682	AFLA_079000	0	2	27	75	810	680	0	0	67	200	101	69		0	163.15	63.4734	86.2215	63.9965	62.687	0	0	58.1097	73.3758	55.0466	44.7107
CADAFLAG00000683	AFLA_079010	0	0	4	18	24	17	0	0	3	28	5	6		0	0	30.1971	66.4513	6.08918	5.03261	0	0	8.35549	32.9881	8.75096	12.485
CADAFLAG00000684	AFLA_079020	5	0	132	280	375	346	0	0	86	392	159	139		382.286	0	372.377	386.272	35.5536	38.2759	0	0	89.5063	172.58	103.989	108.083
CADAFLAG00000685	AFLA_079030	0	0	6	9	42	21	0	0	1	10	9	7		0	0	11.4042	8.36532	2.68291	1.56521	0	0	0.701229	2.96626	3.96586	3.6673
CADAFLAG00000686	AFLA_079040	0	1	30	50	1054	924	0	0	95	197	159	112		0	37.3476	32.289	26.3166	38.1257	38.9983	0	0	37.7227	33.0899	39.6745	33.2266
CADAFLAG00000687	AFLA_079050	0	1	35	59	1349	1159	0	1	97	210	160	122		0	33.8782	34.1711	28.1688	44.2635	44.3725	0	340.53	34.9388	31.9967	36.2153	32.831
CADAFLAG00000688	AFLA_079060	0	0	0	1	14	17	0	0	3	1	4	2		0	0	0	2.29924	2.21223	3.13435	0	0	5.20385	0.733758	4.36013	2.59192
CADAFLAG00000689	AFLA_079070	0	3	50	108	1563	1208	0	0	108	335	193	138		0	71.8113	34.4915	36.4328	36.2363	32.6775	0	0	27.486	36.0647	30.866	26.2395
CADAFLAG00000690	AFLA_079080	0	0	0	0	24	21	0	0	4	1	3	1		0	0	0	0	0.854411	0.872312	0	0	1.56321	0.165313	0.736741	0.291975
CADAFLAG00000691	AFLA_079090	0	0	0	0	4	4	0	0	0	0	1	2		0	0	0	0	0.600461	0.700619	0	0	0	0	1.03553	2.46233
CADAFLAG00000692	AFLA_079100	0	0	0	0	0	0	0	0	0	1	0	0		0	0	0	0	0	0	0	0	0	0.291458	0	0
CADAFLAG00000693	AFLA_079110	2	0	28	54	1009	865	0	1	78	235	126	106		70.1781	0	36.2511	34.1887	43.9033	43.9156	0	451.572	37.2566	47.4816	37.8194	37.827
CADAFLAG00000694	AFLA_079120	1	0	16	51	700	610	0	0	51	111	86	64		22.0773	0	13.0334	20.3158	19.1637	19.4853	0	0	15.3269	14.1109	16.2411	14.3698
CADAFLAG00000695	AFLA_079130	0	0	9	19	322	288	0	0	19	48	41	36		0	0	15.4615	15.962	18.5912	19.4018	0	0	12.0423	12.869	16.3295	17.0469
CADAFLAG00000696	AFLA_079140	3	4	98	219	3078	2533	0	1	223	647	415	315		130.873	223.413	157.741	172.381	166.506	159.88	0	561.414	132.425	162.524	154.863	139.754
CADAFLAG00000697	AFLA_079150	8	5	159	294	5016	4169	0	0	348	1120	540	456		110.576	88.4829	81.0882	73.3219	85.9728	83.3743	0	0	65.4765	89.1401	63.8462	64.1001
CADAFLAG00000698	AFLA_079160	3	1	24	52	602	505	0	0	44	118	69	56		126.934	54.1722	37.4678	39.6987	31.5854	30.9157	0	0	25.3423	28.7491	24.9734	24.0973
CADAFLAG00000699	AFLA_079170	0	1	80	178	3270	2997	0	1	293	690	515	497		0	85.317	196.696	214.019	270.208	288.957	0	857.573	265.779	264.759	293.559	336.819
CADAFLAG00000700	AFLA_079180	0	0	32	49	1074	1041	0	0	103	240	185	173		0	0	16.604	12.4333	18.7288	21.1813	0	0	19.7172	19.4343	22.2544	24.7424
CADAFLAG00000701	AFLA_079190	0	0	24	54	253	244	0	0	18	128	97	83		0	0	18.3509	20.1913	6.50143	7.31602	0	0	5.07766	15.2739	17.1948	17.4927
CADAFLAG00000702	AFLA_079200	0	0	1	0	43	34	0	0	4	10	2	3		0	0	1.45257	0	2.09917	1.93667	0	0	2.14359	2.2669	0.673516	1.20113
CADAFLAG00000703	AFLA_079210	0	0	0	0	0	0	0	0	0	0	0	0		0	0	0	0	0	0	0	0	0	0	0	0
CADAFLAG00000704	AFLA_079220	0	0	0	0	0	0	0	0	0	0	0	0		0	0	0	0	0	0	0	0	0	0	0	0
CADAFLAG00000705	AFLA_079230	0	0	0	0	0	0	0	0	0	0	0	0		0	0	0	0	0	0	0	0	0	0	0	0
CADAFLAG00000706	AFLA_079240	0	0	0	0	2	8	0	0	0	0	0	0		0	0	0	0	0.0872341	0.407139	0	0	0	0	0	0
CADAFLAG00000707	AFLA_079250	0	0	2	3	95	114	0	0	6	9	9	6		0	0	4.54235	3.33195	7.25133	10.153	0	0	5.02745	3.18998	4.73887	3.75609
CADAFLAG00000708	AFLA_079260	0	0	0	1	3	0	0	0	0	0	0	0		0	0	0	0.782428	0.161318	0	0	0	0	0	0	0
CADAFLAG00000709	AFLA_079270	0	0	0	0	1	1	0	0	0	0	0	0		0	0	0	0	0.0379239	0.0442496	0	0	0	0	0	0
CADAFLAG00000710	AFLA_079280	1	0	0	0	2	0	0	0	1	1	0	0		90.2289	0	0	0	0.223774	0	0	0	1.22824	0.519556	0	0
CADAFLAG00000711	AFLA_079290	0	0	0	0	6	1	0	0	0	0	0	0		0	0	0	0	0.215305	0.0418697	0	0	0	0	0	0
CADAFLAG00000712	AFLA_079300	0	0	0	0	1	6	0	0	0	0	0	0		0	0	0	0	0.0428901	0.300265	0	0	0	0	0	0
CADAFLAG00000713	AFLA_079310	0	0	1	0	3	8	0	0	1	2	0	0		0	0	3.02824	0	0.305319	0.949992	0	0	1.11721	0.94518	0	0
CADAFLAG00000714	AFLA_079320	0	0	3	5	104	106	0	0	11	8	12	8		0	0	2.16419	1.76389	2.52145	2.99861	0	0	2.92761	0.900656	2.00695	1.59074
CADAFLAG00000715	AFLA_079330	0	0	0	0	7	7	0	0	0	0	0	0		0	0	0	0	0.265467	0.309747	0	0	0	0	0	0
CADAFLAG00000716	AFLA_079340	0	0	0	0	0	0	0	0	0	0	0	0		0	0	0	0	0	0	0	0	0	0	0	0
CADAFLAG00000717	AFLA_079350	0	0	0	2	62	33	0	0	2	11	9	5		0	0	0	2.1397	4.5586	2.83107	0	0	1.61426	3.75565	4.56479	3.01509
CADAFLAG00000718	AFLA_079360	0	0	0	0	7	3	0	0	0	0	0	0		0	0	0	0	0.606235	0.303152	0	0	0	0	0	0
CADAFLAG00000719	AFLA_079370	0	0	1	4	39	23	0	0	6	3	7	6		0	0	8.5079	16.6421	11.1514	7.67344	0	0	18.833	3.98326	13.8071	14.0704
CADAFLAG00000720	AFLA_079380	0	0	47	78	1019	992	0	0	85	190	153	127		0	0	26.2963	21.3412	19.1609	21.7645	0	0	17.5454	16.59	19.8459	19.5855
CADAFLAG00000721	AFLA_079390	0	0	0	0	4	1	0	0	0	0	1	0		0	0	0	0	0.558568	0.162935	0	0	0	0	0.963284	0
CADAFLAG00000722	AFLA_079400	1	2	71	190	2901	2283	0	1	199	375	241	166		11.358	29.0838	29.7544	38.9379	40.8586	37.5179	0	146.17	30.7674	24.5255	23.4148	19.175
CADAFLAG00000723	AFLA_079410	0	0	5	5	129	105	0	0	12	8	6	8		0	0	4.46665	2.18428	3.87297	3.67825	0	0	3.95493	1.11531	1.24264	1.96986
CADAFLAG00000724	AFLA_079420	0	0	9	9	27	17	0	0	8	5	10	11		0	0	23.1922	11.3414	2.33833	1.71786	0	0	7.60563	2.01078	5.97421	7.81315
CADAFLAG00000725	AFLA_079430	0	0	1	6	71	52	0	0	1	20	16	14		0	0	2.21487	6.49868	5.28505	4.51639	0	0	0.817134	6.9131	8.21578	8.54692
CADAFLAG00000726	AFLA_079440	0	0	2	2	129	111	0	0	13	9	14	4		0	0	2.26638	1.1083	4.91286	4.93248	0	0	5.43489	1.59162	3.67799	1.24938
CADAFLAG00000727	AFLA_079450	0	0	26	44	367	284	0	0	60	106	60	71		0	0	56.6502	46.8821	26.8743	24.2653	0	0	48.2308	36.0436	30.3082	42.6403
CADAFLAG00000728	AFLA_079460	2	0	5	12	237	186	0	0	19	48	24	17		30.17	0	2.78296	3.26621	4.43331	4.05966	0	0	3.90154	4.16939	3.09691	2.60807
CADAFLAG00000729	AFLA_079470	6	2	74	165	1826	1483	0	0	176	368	225	165		39.4216	16.8242	17.9393	19.5607	14.8771	14.0979	0	0	15.741	13.9225	12.6456	11.0253
CADAFLAG00000730	AFLA_079480	0	3	70	138	2123	1870	0	0	131	448	212	193		0	77.6041	52.1834	50.3083	53.1897	54.6658	0	0	36.0289	52.1203	36.6396	39.6575
CADAFLAG00000731	AFLA_079490	0	0	2	1	30	25	0	0	0	5	4	0		0	0	5.82606	1.42453	2.93704	2.85578	0	0	0	2.27306	2.70138	0
CADAFLAG00000732	AFLA_079500	1	0	145	531	1823	1510	0	0	169	495	674	577		43.6242	0	233.392	417.965	98.6163	95.3094	0	0	100.358	124.342	251.513	255.993
CADAFLAG00000733	AFLA_079510	0	0	4	11	206	200	0	1	26	26	38	24		0	0	4.13898	5.56612	7.1638	8.11528	0	360.909	9.9255	4.19857	9.11586	6.84508
CADAFLAG00000734	AFLA_079520	0	0	2	1	29	19	0	0	1	3	3	3		0	0	2.56458	0.627066	1.24976	0.955389	0	0	0.473078	0.600348	0.891844	1.06033
CADAFLAG00000735	AFLA_079530	0	0	0	0	2	6	0	0	1	0	0	0		0	0	0	0	0.188627	0.660269	0	0	1.03532	0	0	0
CADAFLAG00000736	AFLA_079540	0	0	36	40	733	633	0	0	71	222	81	60		0	0	23.1922	12.6016	15.8704	15.9913	0	0	16.875	22.3197	12.0978	10.6543
CADAFLAG00000737	AFLA_079550	0	0	0	1	15	10	0	0	0	3	2	1		0	0	0	0.454269	0.468297	0.364273	0	0	0	0.434914	0.430723	0.256048
CADAFLAG00000738	AFLA_079560	0	0	12	34	626	479	0	0	36	90	48	34		0	0	11.8671	16.4425	20.8056	18.5754	0	0	13.1345	13.89	11.0049	9.2678
CADAFLAG00000739	AFLA_079570	0	1	13	27	194	166	0	0	21	81	33	35		0	36.0448	13.5038	13.7152	6.77264	6.76179	0	0	8.04782	13.1309	7.94709	10.0211
CADAFLAG00000740	AFLA_079580	0	1	54	135	1523	1306	0	0	164	295	232	189		0	76.8558	119.603	146.22	113.368	113.431	0	0	134.01	101.968	119.129	115.383
CADAFLAG00000741	AFLA_079590	0	0	0	1	25	24	0	0	2	7	6	1		0	0	0	1.91324	3.2872	3.68208	0	0	2.88681	4.27401	5.4422	1.07839
CADAFLAG00000742	AFLA_079600	0	0	25	57	1174	1038	0	0	65	331	193	150		0	0	36.6119	40.8209	57.7821	59.61	0	0	35.1189	75.6493	65.527	60.549
CADAFLAG00000743	AFLA_079610	0	0	0	0	1	0	0	0	0	0	0	0		0	0	0	0	0.169942	0	0	0	0	0	0	0
CADAFLAG00000744	AFLA_079620	0	0	0	0	5	1	0	0	0	1	0	0		0	0	0	0	0.833974	0.194616	0	0	0	0.774523	0	0
CADAFLAG00000745	AFLA_079630	0	0	0	0	0	1	0	0	0	1	0	0		0	0	0	0	0	0.111801	0	0	0	0.444939	0	0
CADAFLAG00000746	AFLA_079640	0	2	62	131	2310	1720	0	0	171	358	256	154		0	15.8831	14.1895	14.6613	17.7677	15.4364	0	0	14.4384	12.7866	13.583	9.71473
CADAFLAG00000747	AFLA_079650	2	2	52	113	2177	1643	0	0	213	399	391	250		14.9453	19.1349	14.3374	15.236	20.1729	17.7641	0	0	21.6667	17.1686	24.9934	18.9994
CADAFLAG00000748	AFLA_079660	2	0	22	33	2329	2077	0	0	130	132	228	243		159.636	0	64.791	47.5261	230.518	239.866	0	0	141.247	60.6681	155.671	197.257
CADAFLAG00000749	AFLA_079670	0	0	0	0	2	5	0	0	1	0	1	0		0	0	0	0	0.363916	1.06154	0	0	1.99744	0	1.25519	0
CADAFLAG00000750	AFLA_079680	1	3	67	152	2695	2315	0	0	186	440	312	250		17.1106	65.7213	42.299	46.9273	57.1817	57.3121	0	0	43.3226	43.3514	45.6658	43.504
CADAFLAG00000751	AFLA_079690	0	0	8	13	388	329	0	0	26	53	43	30		0	0	10.3077	8.19105	16.8014	16.6229	0	0	12.3592	10.6571	12.8446	10.6543
CADAFLAG00000752	AFLA_079700	2	1	35	83	1315	1038	0	0	72	174	100	98		53.4076	34.1895	34.4852	39.9916	43.5445	40.1053	0	0	26.1723	26.7552	22.8426	26.6149
CADAFLAG00000753	AFLA_079710	1	1	36	75	1855	1574	0	0	143	243	190	145		37.6344	48.1842	49.9894	50.9288	86.5691	85.7078	0	0	73.2584	52.6595	61.166	55.498
CADAFLAG00000754	AFLA_079720	0	0	24	43	695	589	0	0	60	125	82	51		0	0	15.5362	13.6122	15.1203	14.9516	0	0	14.3295	12.6281	12.3063	9.0999
CADAFLAG00000755	AFLA_079730	1	2	9	24	445	336	0	0	36	94	46	21		27.9901	71.6729	9.29476	12.1209	15.4454	13.6074	0	0	13.7165	15.1502	11.0137	5.9779
CADAFLAG00000756	AFLA_079740	1	0	25	49	1088	992	0	0	84	205	134	130		36.0468	0	33.2505	31.8699	48.6329	51.738	0	0	41.2176	42.5507	41.3184	47.6579
CADAFLAG00000757	AFLA_079750	0	3	14	40	473	371	0	0	41	107	31	27		0	33.7552	4.53961	6.34273	5.15459	4.71742	0	0	4.90478	5.41463	2.33041	2.41317
CADAFLAG00000758	AFLA_079760	0	0	0	0	2	0	0	0	0	1	1	0		0	0	0	0	0.610638	0	0	0	0	1.41777	2.10616	0
CADAFLAG00000759	AFLA_079770	0	2	40	108	1192	992	0	0	125	301	167	158		0	53.2164	30.6723	40.4982	30.7189	29.8289	0	0	35.3624	36.0203	29.6882	33.3946
CADAFLAG00000760	AFLA_079780	0	1	21	58	755	634	0	0	64	179	77	58		0	51.6642	31.2665	42.2294	37.779	37.016	0	0	35.1549	41.5919	26.5786	23.8025
CADAFLAG00000761	AFLA_079790	5	2	26	80	952	751	0	0	79	213	134	130		511.509	261.959	98.1405	147.67	120.769	111.162	0	0	110.014	125.473	117.263	135.255
CADAFLAG00000762	AFLA_079800	3	3	53	95	1265	1171	0	0	105	318	223	142		247.617	317.03	161.408	141.482	129.474	139.845	0	0	117.974	151.138	157.448	119.199
CADAFLAG00000763	AFLA_079810	3	4	147	349	3764	3163	1	4	369	984	582	410		195.429	333.616	353.326	410.213	304.054	298.124	1526.83	3353.38	327.213	369.104	324.311	271.629
CADAFLAG00000764	AFLA_079820	0	0	14	30	419	391	0	0	35	109	74	50		0	0	13.4963	14.1428	13.5752	14.781	0	0	12.4481	16.3987	16.5387	13.2859
CADAFLAG00000765	AFLA_079830	1	4	158	229	6400	5543	0	1	1139	1422	1548	1153		250.463	1282.7	1460.13	1034.9	1987.73	2008.72	0	3223.29	3883.33	2050.83	3316.55	2936.96
CADAFLAG00000766	AFLA_079840	1	0	15	20	851	711	0	0	76	112	103	75		32.2819	0	17.8666	11.6495	34.0662	33.2093	0	0	33.3972	20.8192	28.4426	24.6233
CADAFLAG00000767	AFLA_079850	6	6	187	253	15193	13089	1	2	797	1200	1106	864		197.644	253.049	227.283	150.373	620.599	623.837	772.071	847.85	357.379	227.615	311.645	289.449
CADAFLAG00000768	AFLA_079860	0	0	9	9	374	303	0	0	31	44	40	37		0	0	9.94635	4.86396	13.8911	13.1312	0	0	12.6395	7.58873	10.2485	11.2709
CADAFLAG00000769	AFLA_079870	0	0	13	14	313	277	0	0	24	72	42	34		0	0	11.7504	6.18818	9.50815	9.81812	0	0	8.00323	10.1563	8.80113	8.47074
CADAFLAG00000770	AFLA_079880	37	14	378	986	8190	7024	1	0	618	2669	1135	1001		4299.95	2083.1	1620.86	2067.55	1180.27	1181.08	2723.87	0	977.659	1786.06	1128.31	1183.1
CADAFLAG00000771	AFLA_079890	0	0	9	20	265	259	0	0	14	50	29	28		0	0	28.5443	31.0193	28.2465	32.2119	0	0	16.3814	24.7481	21.3233	24.4776
CADAFLAG00000772	AFLA_079900	2	0	16	50	736	597	0	0	76	169	106	118		88.3987	0	26.0932	39.8753	40.3393	38.1788	0	0	45.7264	43.0119	40.0769	53.0424
CADAFLAG00000773	AFLA_079910	1	2	253	470	6497	5564	0	0	482	1296	909	841		56.5247	144.74	527.656	479.351	455.393	455.048	0	0	370.871	421.823	439.516	483.459
CADAFLAG00000774	AFLA_079920	0	0	0	0	11	11	0	0	0	0	1	0		0	0	0	0	1.63762	1.91078	0	0	0	0	1.02697	0
CADAFLAG00000775	AFLA_079930	0	0	0	1	34	34	0	0	2	3	6	3		0	0	0	0.38209	0.892814	1.04174	0	0	0.57652	0.36581	1.08685	0.646092
CADAFLAG00000776	AFLA_079940	0	0	0	0	0	1	0	0	0	0	0	1		0	0	0	0	0	0.350309	0	0	0	0	0	2.46233
CADAFLAG00000777	AFLA_079950	0	0	0	0	24	24	0	0	5	5	9	6		0	0	0	0	0.869883	1.01498	0	0	1.9894	0.841534	2.25025	1.78358
CADAFLAG00000778	AFLA_079960	0	0	2	0	27	14	0	0	4	7	10	7		0	0	1.93851	0	0.879518	0.532116	0	0	1.43035	1.05884	2.24708	1.87012
CADAFLAG00000779	AFLA_079970	0	0	15	28	273	241	0	0	31	99	44	42		0	0	20.6153	18.8184	12.6097	12.9884	0	0	15.7183	21.2338	14.0195	15.9104
CADAFLAG00000780	AFLA_079980	0	0	0	0	0	0	0	0	0	0	1	0		0	0	0	0	0	0	0	0	0	0	1.75019	0
CADAFLAG00000781	AFLA_079990	0	0	0	0	1	0	0	0	0	0	0	0		0	0	0	0	0.124233	0	0	0	0	0	0	0
CADAFLAG00000782	AFLA_080000	0	0	2	0	18	23	0	0	1	5	4	3		0	0	2.31533	0	0.700322	1.04412	0	0	0.427098	0.903331	1.07355	0.957276
CADAFLAG00000783	AFLA_080010	0	0	2	3	50	54	0	0	8	12	11	15		0	0	11.1666	8.19105	9.38221	11.8229	0	0	16.4789	10.4561	14.2385	23.0843
CADAFLAG00000784	AFLA_080020	15	20	347	770	8229	7350	1	2	737	2920	1271	1010		635.903	1085.55	542.776	588.99	432.595	450.836	993.629	1091.15	425.309	712.802	460.912	435.458
CADAFLAG00000785	AFLA_080030	3	3	56	124	2106	1649	0	1	216	411	257	198		49.4111	63.2623	34.0316	36.8504	43.0126	39.2966	0	211.962	48.4277	38.979	36.2083	33.166
CADAFLAG00000786	AFLA_080040	1	1	38	80	1120	1033	0	0	88	178	105	88		38.7383	49.5976	54.3145	55.9175	53.8013	57.8991	0	0	46.4045	39.7051	34.7938	34.6696
CADAFLAG00000787	AFLA_080050	0	0	9	14	400	411	0	0	26	85	66	72		0	0	18.3421	13.9528	27.3975	32.8465	0	0	19.5491	27.0347	31.184	40.4458
CADAFLAG00000788	AFLA_080060	0	0	3	6	142	135	0	0	19	38	24	19		0	0	10.242	10.0171	16.2928	18.0733	0	0	23.9311	20.2461	18.9957	17.8793
CADAFLAG00000789	AFLA_080070	0	1	28	58	745	620	0	0	73	234	165	85		0	44.7094	36.0768	36.5447	32.2604	31.3257	0	0	34.7007	47.0523	49.2873	30.1872
CADAFLAG00000790	AFLA_080080	1	0	39	66	801	665	0	0	102	190	165	134		16.9905	0	24.449	20.2333	16.8761	16.3478	0	0	23.5908	18.5885	23.9807	23.1545
CADAFLAG00000791	AFLA_080090	1	1	196	339	3186	2802	0	1	383	1156	778	663		41.1526	52.6887	297.608	251.718	162.584	166.839	0	529.606	214.552	273.931	273.873	277.483
CADAFLAG00000792	AFLA_080100	0	3	20	43	639	493	0	0	52	149	91	70		0	200.71	38.561	40.5427	41.4059	37.2739	0	0	36.9886	44.8332	40.6762	37.2006
CADAFLAG00000793	AFLA_080110	0	1	29	46	651	538	0	0	68	181	104	106		0	79.1452	66.1444	51.3073	49.9022	48.1191	0	0	57.2203	64.4271	54.9933	66.64
CADAFLAG00000794	AFLA_080120	0	0	19	56	555	471	0	0	62	162	81	70		0	0	20.3273	29.2981	19.9554	19.76	0	0	24.4716	27.048	20.0905	20.6423
CADAFLAG00000795	AFLA_080130	6	8	174	426	4805	4113	0	2	385	1363	724	525		106.859	182.419	114.34	136.895	106.117	105.986	0	458.4	93.3376	139.779	110.299	95.0919
CADAFLAG00000796	AFLA_080140	52	29	659	1563	13495	11572	0	2	1091	4337	1894	1819		3745.77	2674.58	1751.52	2031.49	1205.44	1206.08	0	1854.06	1069.79	1798.93	1167.05	1332.59
CADAFLAG00000797	AFLA_080150	0	0	26	43	341	341	0	0	32	87	49	65		0	0	258.073	208.72	113.754	132.728	0	0	117.183	134.767	112.758	177.835
CADAFLAG00000798	AFLA_080160	4	12	124	159	5207	3863	1	1	335	560	527	357		34.8157	133.726	39.8225	24.9707	56.2001	48.6487	204.004	112.014	39.6915	28.0666	39.2372	31.6016
CADAFLAG00000799	AFLA_080170	0	0	12	8	296	218	0	1	33	56	19	15		0	0	19.8518	6.47194	16.4571	14.1421	0	577.009	20.1408	14.4578	7.28706	6.8398
CADAFLAG00000800	AFLA_080180	0	1	0	0	8	5	0	0	1	1	0	2		0	172.214	0	0	1.33436	0.973082	0	0	1.83099	0.774523	0	2.73592
CADAFLAG00000801	AFLA_080190	0	0	0	0	14	9	0	0	2	0	2	0		0	0	0	0	2.54741	1.91078	0	0	3.99488	0	2.51038	0
CADAFLAG00000802	AFLA_080200	0	0	56	126	2375	1991	0	0	152	230	291	227		0	0	45.8258	50.4218	65.3173	63.89	0	0	45.8893	29.3727	55.2072	51.2014
CADAFLAG00000803	AFLA_080210	0	0	0	2	96	70	0	0	5	2	6	8		0	0	0	0.949686	3.13284	2.6654	0	0	1.79118	0.303074	1.35069	2.14115
CADAFLAG00000804	AFLA_080220	2	1	23	61	633	593	0	0	58	133	74	65		62.751	40.1709	26.6262	34.5333	24.628	26.9201	0	0	24.7717	24.0286	19.8607	20.741
CADAFLAG00000805	AFLA_080230	43	13	565	1098	8668	7758	0	1	824	2603	1605	1600		2222.97	860.457	1077.72	1024.2	555.672	580.292	0	665.305	579.869	774.865	709.762	841.222
CADAFLAG00000806	AFLA_080240	5	10	208	552	5565	4932	0	0	471	1773	899	856		350.89	898.508	538.587	698.969	484.285	500.79	0	0	449.945	716.467	539.676	610.942
CADAFLAG00000807	AFLA_080250	1	0	26	45	737	596	0	0	57	147	115	64		23.9322	0	22.9587	19.4318	21.8718	20.6377	0	0	18.5693	20.2575	23.5425	15.5772
CADAFLAG00000808	AFLA_080260	1	0	37	38	1305	1178	0	0	130	197	190	166		50.9714	0	69.5857	34.9485	82.4844	86.8767	0	0	90.2001	57.8202	82.8424	86.0518
CADAFLAG00000809	AFLA_080270	0	0	9	14	189	167	0	0	17	41	27	27		0	0	15.3304	11.6618	10.8197	11.155	0	0	10.6833	10.8991	10.6625	12.6768
CADAFLAG00000810	AFLA_080280	1	1	95	198	1576	1314	0	0	173	502	358	330		38.1282	48.8166	133.648	136.216	74.5139	72.4892	0	0	89.7904	110.214	116.762	127.963
CADAFLAG00000811	AFLA_080290	5	1	33	81	1309	1163	0	0	115	220	135	139		305.186	78.1475	74.319	89.2067	99.0761	102.708	0	0	95.5498	77.3221	70.4857	86.2849
CADAFLAG00000812	AFLA_080300	0	0	16	45	393	406	0	0	44	86	74	69		0	0	24.8579	34.1887	20.5201	24.7349	0	0	25.2198	20.8515	26.6536	29.5479
CADAFLAG00000813	AFLA_080310	0	0	0	5	41	45	0	0	5	4	3	6		0	0	0	13.7954	7.77439	9.95616	0	0	10.4077	3.52204	3.92411	9.33092
CADAFLAG00000814	AFLA_080320	1	0	67	146	1616	1477	0	0	154	254	171	148		36.8702	0	91.1468	97.1283	73.8842	78.7929	0	0	77.2918	53.9257	53.9317	55.4961
CADAFLAG00000815	AFLA_080330	1	5	11	46	467	358	0	0	25	115	49	48		19.3434	123.829	7.85083	16.0549	11.2017	10.0195	0	0	6.58277	12.809	8.10775	9.44274
CADAFLAG00000816	AFLA_080340	1	1	16	38	582	514	0	0	61	157	87	71		72.9993	93.4629	43.0953	50.0518	52.6837	54.2892	0	0	60.6158	65.994	54.3263	52.7111
CADAFLAG00000817	AFLA_080350	2	0	13	25	598	481	0	0	32	67	54	42		63.0233	0	15.1149	14.2144	23.3672	21.9304	0	0	13.7264	12.1572	14.5558	13.46
CADAFLAG00000818	AFLA_080360	0	0	7	14	320	294	0	0	23	65	44	34		0	0	13.6934	13.3927	21.0381	22.5528	0	0	16.5992	19.8436	19.9547	18.3327
CADAFLAG00000819	AFLA_080370	0	0	4	5	56	60	0	0	3	9	6	12		0	0	14.9929	9.16481	7.05437	8.81898	0	0	4.14853	5.26459	5.21386	12.3977
CADAFLAG00000820	AFLA_080380	1	0	15	20	303	240	0	0	51	122	84	64		123.109	0	68.1353	44.426	46.2559	42.7496	0	0	85.4667	86.484	88.4589	80.13
CADAFLAG00000821	AFLA_080390	3	6	81	146	3479	2931	0	0	513	924	904	689		163.223	417.958	162.606	143.328	234.72	230.732	0	0	379.94	289.48	420.728	381.246
CADAFLAG00000822	AFLA_080400	1	1	7	15	307	229	0	0	27	34	32	25		38.5328	49.3345	9.95222	10.4289	14.6691	12.7672	0	0	14.1622	7.54389	10.5476	9.79706
CADAFLAG00000823	AFLA_080410	1	0	56	109	3175	2548	0	0	307	364	401	305		13.7435	0	28.3972	27.0297	54.1097	50.6673	0	0	57.4344	28.8061	47.1426	42.6306
CADAFLAG00000824	AFLA_080420	0	0	0	0	12	12	0	0	1	2	3	0		0	0	0	0	2.37545	2.77168	0	0	2.17304	1.83843	4.0966	0
CADAFLAG00000825	AFLA_080430	0	0	6	8	135	116	0	0	55	53	26	26		0	0	12.5788	8.20172	9.51187	9.53645	0	0	42.54	17.3404	12.637	15.0244
CADAFLAG00000826	AFLA_080440	0	0	7	14	466	399	0	0	16	51	29	24		0	0	6.67613	6.52952	14.9367	14.9224	0	0	5.62979	7.59087	6.41218	6.30916
CADAFLAG00000827	AFLA_080450	2	0	26	77	906	786	0	0	70	228	118	69		33.0156	0	15.8363	22.9349	18.5461	18.7734	0	0	15.7298	21.6726	16.6626	11.5841
CADAFLAG00000828	AFLA_080460	2	1	18	52	512	425	0	0	43	150	72	69		127.057	81.3372	42.1923	59.606	40.3342	39.0651	0	0	37.1856	54.8714	39.1267	44.5803
CADAFLAG00000829	AFLA_080470	2	1	67	95	2592	2025	0	0	190	454	340	226		26.7284	17.1105	33.0376	22.9078	42.9548	39.156	0	0	34.5647	34.9369	38.8681	30.7168
CADAFLAG00000830	AFLA_080480	0	0	28	33	398	345	0	0	40	95	55	62		0	0	58.6248	33.7881	28.0059	28.3258	0	0	30.8979	31.0414	26.6973	35.7807
CADAFLAG00000831	AFLA_080490	0	0	2	2	9	4	0	0	0	1	0	0		0	0	0.41518	0.203031	0.0627903	0.0325617	0	0	0	0.0323968	0	0
CADAFLAG00000832	AFLA_080500	0	0	0	0	4	4	0	0	0	0	0	0		0	0	0	0	0.0769	0.0897271	0	0	0	0	0	0
CADAFLAG00000833	AFLA_080510	0	0	0	1	12	12	0	0	2	3	2	0		0	0	0	0.593017	0.489063	0.57064	0	0	0.89478	0.56775	0.562279	0
CADAFLAG00000834	AFLA_080520	0	0	10	17	463	406	0	0	36	39	41	28		0	0	16.5431	13.7529	25.742	26.3381	0	0	21.9718	10.0688	15.7247	12.7676
CADAFLAG00000835	AFLA_080530	4	7	328	735	5437	5020	1	0	649	2046	983	786		291.997	654.24	883.454	968.107	492.167	530.217	1710.97	0	644.912	860.024	613.825	583.534
CADAFLAG00000836	AFLA_080540	0	0	10	15	168	161	0	0	18	66	17	15		0	0	4.74334	3.47938	2.67816	2.99468	0	0	3.14994	4.88566	1.86945	1.96115
CADAFLAG00000837	AFLA_080550	1	0	5	13	208	167	0	0	9	24	19	10		36.8702	0	6.802	8.64841	9.50984	8.90888	0	0	4.51705	5.09534	5.99241	3.74974
CADAFLAG00000838	AFLA_080560	0	0	0	0	47	33	0	0	1	5	4	4		0	0	0	0	1.10529	0.9055	0	0	0.258155	0.546008	0.648896	0.771486
CADAFLAG00000839	AFLA_080570	1	0	19	38	405	253	0	0	40	98	67	57		42.4762	0	29.7777	29.1237	21.3322	15.5488	0	0	23.1282	23.9694	24.344	24.6233
CADAFLAG00000840	AFLA_080580	0	1	4	10	129	101	0	0	12	23	12	11		0	109.407	12.6117	15.4184	13.6693	12.4875	0	0	13.9586	11.3171	8.77155	9.55962
CADAFLAG00000841	AFLA_080590	1	4	30	70	1137	1037	0	0	112	216	133	110		19.6044	100.4	21.7003	24.7611	27.6407	29.4146	0	0	29.8888	24.3834	22.3037	21.9317
CADAFLAG00000842	AFLA_080600	0	1	27	45	801	685	0	0	136	295	255	213		0	40.5209	31.5293	25.6974	31.4359	31.3676	0	0	58.5915	53.761	69.0353	68.5589
CADAFLAG00000843	AFLA_080610	0	3	23	24	1290	965	0	0	216	230	447	321		0	104.1	22.9999	11.7364	43.3542	37.8413	0	0	79.6889	35.8939	103.63	88.4784
CADAFLAG00000844	AFLA_080620	0	1	63	137	2691	2296	0	0	239	620	417	344		0	26.5071	48.1252	51.1775	69.0858	68.7771	0	0	67.3559	73.9127	73.8498	72.431
CADAFLAG00000845	AFLA_080630	1	2	80	242	2562	2187	0	0	207	611	394	246		71.2101	182.344	210.195	310.938	226.233	225.331	0	0	200.655	250.535	239.999	178.157
CADAFLAG00000846	AFLA_080640	1	1	12	24	583	542	0	0	54	117	74	57		56.7455	72.6528	25.1249	24.5731	41.0237	44.5002	0	0	41.7121	38.23	35.92	32.8951
CADAFLAG00000847	AFLA_080650	0	0	21	44	734	575	0	0	61	146	72	44		0	0	21.9557	22.4961	25.7909	23.5741	0	0	23.529	23.8219	17.4518	12.6799
CADAFLAG00000848	AFLA_080660	0	0	4	2	70	61	1	0	13	17	3	3		0	0	5.65697	1.38318	3.32709	3.38294	898.373	0	6.78286	3.75204	0.983617	1.16944
CADAFLAG00000849	AFLA_080670	2	0	517	1271	25920	21838	0	0	2131	3077	2656	2235		63.995	0	610.376	733.802	1028.46	1011.02	0	0	928.189	566.93	726.97	727.308
CADAFLAG00000850	AFLA_080690	0	0	0	0	5	5	0	0	0	2	1	0		0	0	0	0	1.2867	1.50133	0	0	0	2.38996	1.77519	0
CADAFLAG00000851	AFLA_080700	0	1	25	52	1031	716	0	0	66	185	92	68		0	24.7988	17.8666	18.1732	24.763	20.0657	0	0	17.4017	20.6333	15.243	13.3951
CADAFLAG00000852	AFLA_080710	2	0	32	74	1042	933	0	0	64	232	91	90		107.209	0	63.2913	71.5734	69.2635	72.3628	0	0	46.7003	71.6105	41.7269	49.0648
CADAFLAG00000853	AFLA_080720	0	1	13	38	1218	1050	0	0	89	147	160	129		0	39.5726	14.8255	21.1922	46.6827	46.9564	0	0	37.4456	26.1624	42.3025	40.5498
CADAFLAG00000854	AFLA_080730	0	0	3	7	136	110	0	0	7	16	14	8		0	0	3.88404	4.43187	5.91759	5.58464	0	0	3.34354	3.23279	4.20215	2.85487
CADAFLAG00000855	AFLA_080740	2	2	23	57	660	488	0	0	53	90	59	51		30.0452	38.4677	12.7487	15.4503	12.2949	10.6071	0	0	10.8382	7.78528	7.58175	7.79185
CADAFLAG00000856	AFLA_080750	1	4	84	185	3227	2750	0	0	227	813	458	374		45.255	231.765	140.261	151.062	181.092	180.066	0	0	139.839	211.857	177.298	172.133
CADAFLAG00000857	AFLA_080760	0	0	5	7	100	91	0	0	4	32	10	5		0	0	4.63666	3.17438	3.11658	3.30915	0	0	1.36849	4.63106	2.14989	1.27802
CADAFLAG00000858	AFLA_080770	0	0	11	14	103	76	0	0	8	35	13	20		0	0	16.7025	10.3954	5.25616	4.52524	0	0	4.48151	8.29376	4.57628	8.37052
CADAFLAG00000859	AFLA_080780	0	0	3	8	104	116	0	0	8	22	8	6		0	0	2.84098	3.70478	3.30996	4.30769	0	0	2.795	3.25135	1.75638	1.56614
CADAFLAG00000860	AFLA_080790	0	0	43	107	416	402	0	1	50	491	137	101		0	0	39.8753	48.5227	12.965	14.6184	0	323.444	17.1061	71.0578	29.4535	25.8161
CADAFLAG00000861	AFLA_080800	0	0	0	0	16	13	0	0	4	3	2	0		0	0	0	0	1.237	1.17271	0	0	3.39479	1.07702	1.06664	0
CADAFLAG00000862	AFLA_080810	1	0	9	8	181	145	0	0	29	52	34	36		34.5056	0	11.4584	4.98078	7.74466	7.23917	0	0	13.6215	10.3319	10.0355	12.6333
CADAFLAG00000863	AFLA_080820	2	0	24	42	615	476	0	0	60	260	96	107		72.8163	0	32.2405	27.5909	27.7657	25.0748	0	0	29.7363	54.5078	29.898	39.6194
CADAFLAG00000864	AFLA_080830	0	0	18	41	750	711	0	0	43	101	69	60		0	0	30.8242	34.3343	43.1641	47.745	0	0	27.1664	26.992	27.3936	28.3207
CADAFLAG00000865	AFLA_080840	1	1	24	49	548	480	0	0	61	115	82	90		149.761	191.743	132.618	132.408	101.769	104.009	0	0	124.356	99.1709	105.048	137.078
CADAFLAG00000866	AFLA_080850	3	1	19	51	997	801	0	0	56	80	70	67		81.3071	34.6998	18.9999	24.9399	33.5071	31.4102	0	0	20.6601	12.4848	16.2285	18.4674
CADAFLAG00000867	AFLA_080860	0	1	37	77	2763	2185	0	0	150	278	175	133		0	74.1001	79.0116	80.4093	198.296	182.97	0	0	118.175	92.6465	86.638	78.2843
CADAFLAG00000868	AFLA_080870	4	0	21	55	885	756	0	0	47	138	78	83		82.7741	0	16.0341	20.536	22.7097	22.6354	0	0	13.2394	16.4437	13.8071	17.4678
CADAFLAG00000869	AFLA_080880	0	0	0	0	18	21	0	0	5	3	3	3		0	0	0	0	1.0426	1.41926	0	0	3.1792	0.806898	1.19868	1.42514
CADAFLAG00000870	AFLA_080890	0	1	36	49	751	629	0	0	157	213	183	158		0	55.027	57.0885	37.9987	40.0248	39.1144	0	0	91.8527	52.7134	67.2788	69.0617
CADAFLAG00000871	AFLA_080900	1	5	194	243	3316	2630	0	0	838	1172	1474	1015		15.2114	97.3776	108.883	66.6948	62.5486	57.8836	0	0	173.52	102.655	191.795	157.022
CADAFLAG00000872	AFLA_080910	0	0	18	16	344	304	0	0	46	82	70	60		0	0	40.033	17.4017	25.7127	26.513	0	0	37.7441	28.4613	36.0932	36.7816
CADAFLAG00000873	AFLA_080920	30	33	545	1411	13727	11856	3	1	1199	3686	1856	1437		970.614	1366.97	650.599	823.702	550.726	555.002	2274.95	416.372	528.058	686.7	513.66	472.833
CADAFLAG00000874	AFLA_080930	4	3	94	220	3548	3008	0	0	272	869	530	339		43.5044	41.7749	37.7218	43.1732	47.8511	47.335	0	0	40.2698	54.4226	49.3085	37.4972
CADAFLAG00000875	AFLA_080940	0	0	0	1	9	10	0	0	1	2	4	0		0	0	0	0.277663	0.171742	0.222654	0	0	0.209477	0.177221	0.526541	0
CADAFLAG00000876	AFLA_080950	0	1	18	22	539	435	0	0	80	106	80	65		0	39.8268	20.6594	12.348	20.7911	19.5783	0	0	33.8752	18.9866	21.2871	20.5633
CADAFLAG00000877	AFLA_080960	0	0	16	22	427	365	0	0	33	72	39	40		0	0	15.8521	10.659	14.2179	14.1807	0	0	12.0622	11.1325	8.95801	10.9234
CADAFLAG00000878	AFLA_080970	3	5	89	165	3130	2183	0	0	227	546	474	364		46.5439	99.3189	50.9475	46.1894	60.2171	49.0034	0	0	47.9407	48.7776	62.906	57.4338
CADAFLAG00000879	AFLA_080980	0	0	0	0	26	7	0	0	6	4	1	0		0	0	0	0	1.21652	0.382156	0	0	3.08176	0.869075	0.322763	0
CADAFLAG00000880	AFLA_080990	0	0	0	7	135	121	0	0	8	13	5	4		0	0	0	3.74448	4.963	5.1903	0	0	3.22851	2.21924	1.268	1.20604
CADAFLAG00000881	AFLA_081000	0	1	20	44	897	737	0	0	63	108	84	61		0	15.2577	8.79406	9.46103	13.2555	12.7077	0	0	10.2199	7.41102	8.56288	7.39304
CADAFLAG00000882	AFLA_081010	1	0	4	11	103	79	0	0	10	23	16	14		48.7479	0	7.1946	9.67533	6.22626	5.57204	0	0	6.63579	6.45609	6.67187	6.94079
CADAFLAG00000883	AFLA_081020	0	3	42	99	2110	1974	0	0	215	452	352	280		0	111.076	44.8147	51.6574	75.6653	82.5959	0	0	84.636	75.267	87.0752	82.3499
CADAFLAG00000884	AFLA_081030	0	1	14	49	753	671	0	0	66	164	108	117		0	40.8772	16.4922	28.2276	29.8119	30.9966	0	0	28.6841	30.1502	29.4955	37.9902
CADAFLAG00000885	AFLA_081040	2	3	66	172	1376	1127	0	2	127	351	214	173		49.9777	95.9817	60.853	77.5519	42.6382	40.7476	0	643.179	43.2003	50.5056	45.7438	43.9661
CADAFLAG00000886	AFLA_081050	0	0	33	47	652	566	0	0	55	119	84	69		0	0	20.8338	14.5104	13.8339	14.0124	0	0	12.8104	11.7246	12.2946	12.0071
CADAFLAG00000887	AFLA_081060	0	0	6	11	110	86	0	0	14	29	20	19		0	0	11.2447	10.0813	6.9284	6.32027	0	0	9.6799	8.48184	8.68976	9.81487
CADAFLAG00000888	AFLA_081070	0	0	3	18	88	103	0	0	9	93	30	15		0	0	13.5126	39.6474	13.3212	18.1925	0	0	14.9556	65.3723	31.327	18.6226
CADAFLAG00000889	AFLA_081080	0	0	0	0	41	30	0	0	3	2	2	6		0	0	0	0	6.96762	5.94865	0	0	5.5966	1.57827	2.3446	8.36262
CADAFLAG00000890	AFLA_081090	0	0	15	41	304	300	1	0	24	121	49	40		0	0	27.1621	36.3063	18.5007	21.3026	1150.28	0	16.0335	34.1941	20.5707	19.9648
CADAFLAG00000891	AFLA_081100	0	0	0	0	1	2	0	0	0	0	1	0		0	0	0	0	0.0973721	0.227228	0	0	0	0	0.671695	0
CADAFLAG00000892	AFLA_081110	0	0	12	21	209	188	0	0	22	93	30	28		0	0	16.3248	13.9705	9.55556	10.0292	0	0	11.0417	19.7444	9.4617	10.4993
CADAFLAG00000893	AFLA_081120	0	0	1	0	26	19	0	0	0	5	2	2		0	0	5.76342	0	5.03613	4.29412	0	0	0	4.49723	2.67234	3.1772
CADAFLAG00000894	AFLA_081130	1	0	14	19	897	773	0	0	52	115	82	53		20.6935	0	10.6894	7.09424	23.0177	23.1444	0	0	14.6479	13.7031	14.5151	11.1541
CADAFLAG00000895	AFLA_081140	0	1	49	89	1802	1538	0	0	124	255	221	176		0	41.485	58.5812	52.0329	72.4036	72.1038	0	0	54.6927	47.577	61.2541	57.9974
CADAFLAG00000896	AFLA_081150	0	0	35	81	1303	1128	0	0	100	265	192	163		0	0	73.5683	83.2596	92.0472	92.9762	0	0	77.5476	86.9288	93.5632	94.4375
CADAFLAG00000897	AFLA_081160	0	0	0	0	0	3	0	0	0	0	0	0		0	0	0	0	0	0.253236	0	0	0	0	0	0
CADAFLAG00000898	AFLA_081170	0	0	0	0	3	0	0	0	0	0	0	2		0	0	0	0	0.245643	0	0	0	0	0	0	1.34309
CADAFLAG00000899	AFLA_081180	0	0	0	0	1	1	0	0	0	0	0	0		0	0	0	0	0.133436	0.155693	0	0	0	0	0	0
CADAFLAG00000900	AFLA_081190	13	1	153	235	2298	1952	1	0	289	1000	595	594		1764.95	173.824	766.427	575.67	386.877	383.442	3182.09	0	534.1	781.761	690.999	820.162
CADAFLAG00000901	AFLA_081200	0	0	11	9	298	260	0	0	29	48	29	24		0	0	24.5666	9.82925	22.3672	22.7701	0	0	23.8944	16.7297	15.0152	14.774
CADAFLAG00000902	AFLA_081210	1	2	37	80	1502	1196	0	0	105	373	182	154		18.6242	47.69	25.4255	26.8834	34.6882	32.2285	0	0	26.6197	40.0011	28.9948	29.1691
CADAFLAG00000903	AFLA_081220	0	0	0	0	5	6	0	0	0	3	1	0		0	0	0	0	0.559436	0.783301	0	0	0	1.55867	0.771824	0
CADAFLAG00000904	AFLA_081230	0	0	0	0	0	0	0	0	0	0	0	0		0	0	0	0	0	0	0	0	0	0	0	0
CADAFLAG00000905	AFLA_081240	0	0	0	0	0	1	0	0	0	0	0	0		0	0	0	0	0	0.087214	0	0	0	0	0	0
CADAFLAG00000906	AFLA_081250	0	0	10	10	279	247	0	0	23	49	47	32		0	0	24.9301	12.1913	23.3761	24.1469	0	0	21.1543	19.0641	27.1646	21.9891
CADAFLAG00000907	AFLA_081260	9	4	20	74	738	612	0	0	47	109	81	52		358.197	203.826	29.3697	53.1408	36.4225	35.2421	0	0	25.4632	24.98	27.5763	21.0478
CADAFLAG00000908	AFLA_081270	0	0	5	14	395	373	0	0	26	53	40	24		0	0	5.31392	7.27612	14.1087	15.5451	0	0	10.1945	8.79055	9.85567	7.03057
CADAFLAG00000909	AFLA_081280	8	6	137	240	4214	3476	1	0	343	757	466	424		434.719	417.436	274.682	235.314	283.954	273.294	1273.63	0	253.717	236.865	216.609	234.32
CADAFLAG00000910	AFLA_081290	0	0	6	15	301	200	0	1	30	49	29	29		0	0	9.59996	11.7364	16.1856	12.5484	0	558.062	17.7086	12.2351	10.7571	12.7894
CADAFLAG00000911	AFLA_081300	0	1	6	24	342	322	0	0	51	60	41	38		0	45.8106	7.92115	15.4944	15.1742	16.6699	0	0	24.8401	12.3618	12.5488	13.8278
CADAFLAG00000912	AFLA_081310	0	1	55	98	1593	1393	0	0	142	404	308	208		0	33.5724	53.2128	46.3666	51.7979	52.8499	0	0	50.6859	61	69.0852	55.469
CADAFLAG00000913	AFLA_081320	0	0	13	28	427	403	0	0	53	81	83	76		0	0	39.1459	41.2313	43.213	47.587	0	0	58.8796	38.0647	57.9432	63.0798
CADAFLAG00000914	AFLA_081330	4	4	245	324	7428	6078	1	2	949	1473	1918	1647		117.626	150.6	265.829	171.912	270.864	258.605	689.238	756.886	379.881	249.421	482.465	492.565
CADAFLAG00000915	AFLA_081340	0	5	105	182	4529	3688	0	0	552	833	1040	819		0	60.4653	36.5928	31.0173	53.0459	50.4008	0	0	70.9727	45.305	84.0274	78.6728
CADAFLAG00000916	AFLA_081350	0	0	3	7	235	226	0	0	28	54	40	28		0	0	1.96097	2.23755	5.1625	5.79292	0	0	6.75232	5.50856	6.06164	5.04477
CADAFLAG00000917	AFLA_081360	6	1	98	201	1719	1569	0	0	153	427	262	226		233.051	49.7303	140.449	140.868	82.7962	88.1768	0	0	80.8963	95.5024	87.051	89.2758
CADAFLAG00000918	AFLA_081370	0	0	5	21	304	268	0	0	41	44	47	37		0	0	6.69997	13.761	13.6905	14.0824	0	0	20.269	9.20133	14.601	13.6659
CADAFLAG00000919	AFLA_081380	12	7	308	748	4639	4120	0	1	468	2072	917	695		549.913	410.706	520.78	618.488	263.616	273.175	0	589.75	291.941	546.75	359.463	323.909
CADAFLAG00000920	AFLA_081390	0	0	0	4	51	31	0	0	4	10	8	9		0	0	0	2.58877	2.26841	1.60883	0	0	1.95305	2.06539	2.45459	3.2831
CADAFLAG00000921	AFLA_081410	1	2	22	49	879	795	0	0	75	135	81	79		16.3223	41.7958	13.2494	14.431	17.7912	18.775	0	0	16.664	12.6882	11.3094	13.114
CADAFLAG00000922	AFLA_081420	0	0	8	2	181	163	0	0	19	18	30	22		0	0	15.3142	1.87224	11.6447	12.2358	0	0	13.4185	5.3774	13.314	11.6081
CADAFLAG00000923	AFLA_081430	11	14	226	493	6065	5150	0	0	445	1345	795	612		215.358	350.927	163.255	174.154	147.242	145.884	0	0	118.595	151.627	133.14	121.855
CADAFLAG00000924	AFLA_081440	1	3	23	43	589	494	0	0	62	144	91	78		37.8962	145.558	32.1599	29.4023	27.6786	27.0865	0	0	31.9833	31.4227	29.4991	30.0618
CADAFLAG00000925	AFLA_081450	1	0	23	67	997	855	0	0	72	219	115	104		18.7202	0	15.8865	22.6309	23.1441	23.1583	0	0	18.3476	23.607	18.4154	19.8002
CADAFLAG00000926	AFLA_081460	0	0	0	2	36	31	0	0	7	0	8	3		0	0	0	0.643223	0.795703	0.799479	0	0	1.69844	0	1.21977	0.543827
CADAFLAG00000927	AFLA_081470	0	4	21	37	589	430	0	0	38	62	39	28		0	143.715	21.7436	18.7344	20.4961	17.4591	0	0	14.5158	10.0184	9.36178	7.99107
CADAFLAG00000928	AFLA_081480	0	3	263	850	2733	2416	0	0	737	2037	960	860		0	292.133	738.049	1166.47	257.758	265.868	0	0	763.032	892.104	624.571	665.215
CADAFLAG00000929	AFLA_081490	0	0	32	35	603	528	0	0	103	153	139	85		0	0	47.381	25.3425	30.0065	30.6569	0	0	56.2649	35.3542	47.7145	34.6902
CADAFLAG00000930	AFLA_081500	0	0	9	15	569	554	0	0	75	102	80	81		0	0	15.363	12.5213	32.6429	37.0837	0	0	47.2324	27.1724	31.6595	38.1112
CADAFLAG00000931	AFLA_081510	0	1	19	39	728	643	0	0	73	146	96	80		0	139.843	76.5711	76.8603	98.602	101.616	0	0	108.538	91.8246	89.694	88.8659
CADAFLAG00000932	AFLA_081520	0	0	0	0	1	3	0	0	2	1	0	0		0	0	0	0	0.105344	0.368747	0	0	2.31282	0.489172	0	0
CADAFLAG00000933	AFLA_081530	0	0	0	0	0	2	0	0	0	0	1	0		0	0	0	0	0	0.525464	0	0	0	0	1.5533	0
CADAFLAG00000934	AFLA_081540	1	0	12	23	991	867	1	0	63	97	77	71		32.792	0	14.5191	13.6086	40.2973	41.1357	768.586	0	28.122	18.3158	21.5989	23.6784
CADAFLAG00000935	AFLA_081550	0	0	13	48	430	369	1	0	61	213	121	98		0	0	20.6153	37.2232	22.917	22.9463	1007.35	0	35.688	52.7134	44.4849	42.8357
CADAFLAG00000936	AFLA_081560	1	2	68	141	1537	1283	0	0	176	478	291	233		59.7813	153.079	149.991	152.091	113.939	110.975	0	0	143.224	164.543	148.81	141.66
CADAFLAG00000937	AFLA_081570	0	0	3	4	64	72	0	0	7	25	13	15		0	0	2.79166	1.82023	2.00154	2.62732	0	0	2.40317	3.63058	2.80456	3.84739
CADAFLAG00000938	AFLA_081580	0	1	7	14	87	57	0	0	12	37	20	15		0	74.3965	15.0079	14.6784	6.26881	4.79223	0	0	9.49183	12.38	9.94109	8.86438
CADAFLAG00000939	AFLA_081590	0	0	0	0	0	2	0	0	0	0	1	0		0	0	0	0	0	0.512648	0	0	0	0	1.51541	0
CADAFLAG00000940	AFLA_081600	0	0	6	10	141	119	0	0	21	25	18	16		0	0	8.57597	6.98969	6.7732	6.66989	0	0	11.0738	5.57656	5.96465	6.30356
CADAFLAG00000941	AFLA_081610	0	0	0	0	3	1	0	0	0	0	0	0		0	0	0	0	0.126561	0.0492238	0	0	0	0	0	0
CADAFLAG00000942	AFLA_081620	0	0	28	35	622	533	0	0	52	102	97	64		0	0	64.1365	39.205	47.8829	47.8756	0	0	43.9437	36.4621	51.511	40.4074
CADAFLAG00000943	AFLA_081630	0	0	1	1	28	44	0	0	2	4	5	3		0	0	0.978098	0.478309	0.920415	1.68762	0	0	0.721702	0.610573	1.13379	0.808793
CADAFLAG00000944	AFLA_081640	0	1	29	38	989	866	0	0	97	171	191	165		0	67.1448	56.1153	35.9578	64.3165	65.7115	0	0	69.247	51.6386	85.6836	88.0037
CADAFLAG00000945	AFLA_081650	0	0	0	0	3	2	0	0	1	0	0	0		0	0	0	0	0.210278	0.163569	0	0	0.769442	0	0	0
CADAFLAG00000946	AFLA_081660	0	0	10	21	243	228	0	0	29	66	28	26		0	0	57.6342	59.1869	47.0684	51.5294	0	0	61.6629	59.3634	37.4127	41.3035
CADAFLAG00000947	AFLA_081670	0	0	4	4	127	109	0	0	14	19	12	5		0	0	3.92672	1.92024	4.19003	4.19601	0	0	5.07042	2.91084	2.73107	1.35293
CADAFLAG00000948	AFLA_081680	0	0	0	0	0	0	0	0	0	0	0	0		0	0	0	0	0	0	0	0	0	0	0	0
CADAFLAG00000949	AFLA_081690	0	0	1	0	30	29	0	0	1	1	3	2		0	0	1.97785	0	1.99415	2.24922	0	0	0.729692	0.308666	1.37561	1.09033
CADAFLAG00000950	AFLA_081700	0	0	0	0	1	0	0	0	0	0	0	0		0	0	0	0	0.0552572	0	0	0	0	0	0	0
CADAFLAG00000951	AFLA_081710	0	0	0	0	7	3	0	0	0	1	0	0		0	0	0	0	0.894304	0.447204	0	0	0	0.593251	0	0
CADAFLAG00000952	AFLA_081720	0	1	1	1	44	30	0	0	4	4	4	4		0	33.1535	0.955433	0.467225	1.41285	1.12399	0	0	1.40996	0.596424	0.886015	1.0534
CADAFLAG00000953	AFLA_081730	0	1	64	128	1765	1561	0	0	142	306	255	186		0	64.1349	118.289	115.691	109.636	113.138	0	0	96.8276	88.2635	109.266	94.7571
CADAFLAG00000954	AFLA_081740	1	1	7	8	208	184	0	0	13	47	22	20		100.185	128.27	25.8758	14.4614	25.8405	26.6718	0	0	17.729	27.1136	18.8538	20.3779
CADAFLAG00000955	AFLA_081750	4	7	86	207	3786	3207	2	0	313	630	434	352		103.21	231.25	81.8753	96.3721	121.137	119.727	1209.53	0	109.937	93.6031	95.7911	92.3701
CADAFLAG00000956	AFLA_081760	0	0	3	5	94	108	0	0	9	18	13	30		0	0	27.2541	22.213	28.7	38.4747	0	0	30.1647	25.5199	27.3801	75.1218
CADAFLAG00000957	AFLA_081770	0	0	26	14	191	164	0	0	22	51	19	26		0	0	50.8611	13.3927	12.5571	12.5805	0	0	15.8775	15.5696	8.61682	14.0191
CADAFLAG00000958	AFLA_081780	0	0	0	0	0	0	0	0	0	0	1	0		0	0	0	0	0	0	0	0	0	0	1.44493	0
CADAFLAG00000959	AFLA_081790	0	0	40	67	134	122	0	0	42	23	21	19		0	0	35.4965	29.0755	3.99645	4.24547	0	0	13.7506	3.18529	4.32042	4.64744
CADAFLAG00000960	AFLA_081800	0	0	0	0	5	1	0	0	1	2	0	0		0	0	0	0	0.682342	0.159232	0	0	1.49808	1.2674	0	0
CADAFLAG00000961	AFLA_081810	1	0	1	1	61	40	0	0	4	7	6	5		37.7321	0	1.3922	0.680814	2.85414	2.18375	0	0	2.05451	1.52088	1.93658	1.9187
CADAFLAG00000962	AFLA_081820	0	0	0	1	27	20	0	0	5	2	9	7		0	0	0	0.5723	1.06195	0.917841	0	0	2.1588	0.365277	2.44186	2.25803
CADAFLAG00000963	AFLA_081830	0	0	0	0	0	0	0	0	0	0	0	0		0	0	0	0	0	0	0	0	0	0	0	0
CADAFLAG00000964	AFLA_081840	0	0	1	0	16	15	0	0	0	0	0	2		0	0	1.68024	0	0.903515	0.988334	0	0	0	0	0	0.926267
CADAFLAG00000965	AFLA_081850	2	0	2	4	86	77	0	0	8	11	17	12		77.1338	0	2.84601	2.78351	4.11289	4.29672	0	0	4.19993	2.44283	5.60836	4.70675
CADAFLAG00000966	AFLA_081860	2	4	102	203	4848	3947	0	0	292	694	413	330		25.3744	64.9751	47.7483	46.4708	76.2717	72.4544	0	0	50.4297	50.7005	44.8217	42.58
CADAFLAG00000967	AFLA_081870	1	1	35	45	696	585	0	0	47	159	62	44		14.3122	18.3243	18.4827	11.6208	12.3523	12.1141	0	0	9.15673	13.1036	7.59049	6.40448
CADAFLAG00000968	AFLA_081880	2	0	60	122	2522	2089	0	0	155	410	316	264		76.0569	0	84.1881	83.7116	118.929	114.942	0	0	80.2374	89.7798	102.794	102.103
CADAFLAG00000969	AFLA_081890	0	0	0	0	7	5	0	0	1	0	3	0		0	0	0	0	0.597615	0.49807	0	0	0.937187	0	1.76678	0
CADAFLAG00000970	AFLA_081900	0	0	845	1775	49855	45501	0	0	2416	6699	7038	7050		0	0	4621.61	4747.46	9164.08	9758.83	0	0	4875.06	5717.97	8924.16	10628.2
CADAFLAG00000971	AFLA_081910	0	0	6	1	175	133	0	0	4	31	25	12		0	0	11.7372	0.956618	11.5052	10.2024	0	0	2.88681	9.46388	11.3379	6.47035
CADAFLAG00000972	AFLA_081920	0	0	4	4	66	70	0	0	9	15	10	3		0	0	4.32256	2.11382	2.397	2.96633	0	0	3.58814	2.52969	2.50532	0.893586
CADAFLAG00000973	AFLA_081930	0	0	19	26	1125	933	0	0	60	90	75	79		0	0	45.4641	30.4239	90.4713	87.5461	0	0	52.9678	33.6088	41.6061	52.1046
CADAFLAG00000974	AFLA_081940	2	1	31	52	306	223	1	0	42	200	146	115		125.774	80.5156	71.9305	59.0039	23.8625	20.2907	1473.95	0	35.9539	72.4229	78.5389	73.55
CADAFLAG00000975	AFLA_081950	0	0	0	0	3	2	0	0	0	0	0	0		0	0	0	0	0.128365	0.0998507	0	0	0	0	0	0
CADAFLAG00000976	AFLA_081960	0	0	0	0	0	0	0	0	0	0	0	0		0	0	0	0	0	0	0	0	0	0	0	0
CADAFLAG00000977	AFLA_081970	0	0	0	0	0	0	0	0	0	0	0	0		0	0	0	0	0	0	0	0	0	0	0	0
CADAFLAG00000978	AFLA_081980	0	0	4	7	123	106	0	0	10	38	21	20		0	0	6.55655	5.61099	6.77585	6.81336	0	0	6.04729	9.72062	7.98023	9.03606
CADAFLAG00000979	AFLA_081990	1	0	0	2	6	2	0	0	0	0	0	0		103.763	0	0	3.74448	0.772021	0.300265	0	0	0	0	0	0
CADAFLAG00000980	AFLA_082000	0	0	6	10	17	15	0	0	4	10	9	1		0	0	36.9654	30.128	3.51994	3.62389	0	0	9.09179	9.61477	12.8549	1.69816
CADAFLAG00000981	AFLA_082010	0	0	0	0	10	6	0	0	0	2	1	0		0	0	0	0	1.93697	1.35604	0	0	0	1.79889	1.33617	0
CADAFLAG00000982	AFLA_082020	0	0	0	3	17	6	0	0	1	3	2	2		0	0	0	4.32055	1.68261	0.69292	0	0	1.08652	1.37882	1.36553	1.62351
CADAFLAG00000983	AFLA_082030	0	0	1	1	29	30	0	0	3	2	4	3		0	0	2.05363	1.00427	2.00154	2.41593	0	0	2.27295	0.640984	1.90442	1.69816
CADAFLAG00000984	AFLA_082040	0	0	0	1	3	4	0	0	0	4	0	0		0	0	0	1.54184	0.317891	0.494554	0	0	0	1.9682	0	0
CADAFLAG00000985	AFLA_082050	0	0	0	0	1	0	0	0	0	0	0	0		0	0	0	0	0.0265691	0	0	0	0	0	0	0
CADAFLAG00000986	AFLA_082060	0	0	0	0	0	0	0	0	0	0	0	0		0	0	0	0	0	0	0	0	0	0	0	0
CADAFLAG00000987	AFLA_082070	0	0	5	12	91	83	0	0	14	26	10	11		0	0	5.20386	6.1075	3.18303	3.38746	0	0	5.37563	4.22303	2.41289	3.1556
CADAFLAG00000988	AFLA_082080	0	0	8	8	75	63	0	0	7	26	4	3		0	0	17.646	8.62925	5.55983	5.44926	0	0	5.6964	8.95004	2.04549	1.82395
CADAFLAG00000989	AFLA_082090	1	0	9	9	111	96	0	0	7	27	12	6		22.0773	0	7.33128	3.58514	3.03881	3.06654	0	0	2.10369	3.43238	2.26621	1.34717
CADAFLAG00000990	AFLA_082100	1	0	1	16	57	57	0	0	12	37	11	5		11.2699	0	0.415825	3.25354	0.796578	0.929448	0	0	1.84093	2.40108	1.06043	0.573078
CADAFLAG00000991	AFLA_082110	0	0	10	7	455	432	0	0	230	84	179	159		0	0	8.46758	2.89857	12.9483	14.3444	0	0	71.851	11.1003	35.1393	37.1099
CADAFLAG00000992	AFLA_082120	0	0	1	1	0	0	0	0	1	0	0	0		0	0	5.52575	2.7022	0	0	0	0	2.03862	0	0	0
CADAFLAG00000993	AFLA_082130	0	0	0	0	0	0	0	0	0	0	0	0		0	0	0	0	0	0	0	0	0	0	0	0
CADAFLAG00000994	AFLA_082140	0	0	0	0	0	0	0	0	0	0	0	0		0	0	0	0	0	0	0	0	0	0	0	0
CADAFLAG00000995	AFLA_082150	0	0	0	8	22	16	0	0	6	8	6	3		0	0	0	1.02488	0.193697	0.164368	0	0	0.579902	0.327071	0.364409	0.216627
CADAFLAG00000996	AFLA_082160	0	0	7	21	1554	1301	0	0	56	49	29	26		0	0	7.07922	10.3856	52.8179	51.5946	0	0	20.894	7.73354	6.79933	7.2476
CADAFLAG00000997	AFLA_082170	0	0	0	0	2	6	0	0	0	1	0	0		0	0	0	0	0.0849709	0.297433	0	0	0	0.197284	0	0
CADAFLAG00000998	AFLA_082180	0	0	20	55	725	520	0	0	98	155	83	61		0	0	119.111	160.18	145.111	121.441	0	0	215.324	144.061	114.599	100.135
CADAFLAG00000999	AFLA_082190	0	0	0	0	9	3	0	0	0	0	0	1		0	0	0	0	0.587408	0.228463	0	0	0	0	0	0.535288
CADAFLAG00001000	AFLA_082200	0	1	5	5	281	232	0	0	10	16	4	8		0	29.1066	4.19404	2.05097	7.92158	7.63115	0	0	3.09462	2.09448	0.777863	1.84964
CADAFLAG00001001	AFLA_082210	0	0	3	5	33	12	0	0	5	5	8	8		0	0	4.4916	3.6608	1.66049	0.704533	0	0	2.76182	1.16827	2.77684	3.30144
CADAFLAG00001002	AFLA_082220	0	1	4	9	71	72	0	0	11	18	12	4		0	31.7934	3.66494	4.03251	2.18629	2.5869	0	0	3.71831	2.5738	2.549	1.01019
CADAFLAG00001003	AFLA_082230	6	1	35	130	1017	914	0	0	93	221	94	114		178.609	38.1129	38.4425	69.8253	37.5411	39.3667	0	0	37.6853	37.8818	23.936	34.5129
CADAFLAG00001004	AFLA_082240	2	1	67	111	1852	1624	0	0	151	282	140	159		104.135	66.6635	128.716	104.282	119.576	122.345	0	0	107.024	84.5479	62.3545	84.1957
CADAFLAG00001005	AFLA_082250	0	0	0	3	11	7	0	0	2	10	2	6		0	0	0	1.2786	0.322199	0.239236	0	0	0.643078	1.36014	0.404109	1.44136
CADAFLAG00001006	AFLA_082260	0	0	1	0	2	2	0	0	1	0	2	1		0	0	1.11203	0	0.0747462	0.087214	0	0	0.410262	0	0.515617	0.306514
CADAFLAG00001007	AFLA_082270	0	0	0	0	9	11	0	0	3	2	2	2		0	0	0	0	0.312379	0.44548	0	0	1.14304	0.322345	0.478858	0.569324
CADAFLAG00001008	AFLA_082280	1	2	116	223	1299	1152	0	1	262	904	653	604		56.7455	145.306	242.874	228.325	91.4061	94.5835	0	730.277	202.381	295.384	316.969	348.573
CADAFLAG00001009	AFLA_082290	2	0	20	47	407	353	0	0	40	95	56	40		109.225	0	40.3006	46.3133	27.5625	27.8931	0	0	29.7363	29.8744	26.1608	22.2165
CADAFLAG00001010	AFLA_082300	1	0	18	45	581	503	0	0	75	122	77	71		39.4752	0	26.2173	32.0519	28.4403	28.7292	0	0	40.3016	27.7313	26.0008	28.5041
CADAFLAG00001011	AFLA_082310	1	0	33	81	1592	1288	0	1	128	208	184	177		26.0805	0	31.7557	38.117	51.4866	48.6031	0	335.639	45.4426	31.2368	41.0494	46.9478
CADAFLAG00001012	AFLA_082320	0	0	30	57	947	742	0	0	109	173	123	87		0	0	64.3197	59.7619	68.2364	62.3831	0	0	86.2175	57.8847	61.1377	51.4134
CADAFLAG00001013	AFLA_082330	2	0	11	15	212	193	0	0	22	41	24	17		61.4244	0	12.4651	8.31227	8.07385	8.57629	0	0	9.19751	7.25071	6.30513	5.30988
CADAFLAG00001014	AFLA_082340	1	1	13	16	255	236	0	0	17	33	22	27		16.6784	21.3537	7.99997	4.81494	5.27385	5.69504	0	0	3.85958	3.16923	3.13869	4.57976
CADAFLAG00001015	AFLA_082350	0	0	0	0	3	1	0	0	0	0	0	0		0	0	0	0	0.701838	0.272968	0	0	0	0	0	0
CADAFLAG00001016	AFLA_082360	0	0	5	5	24	16	0	0	8	6	6	6		0	0	10.3474	5.06011	1.66924	1.29844	0	0	6.108	1.9378	2.87869	3.42254
CADAFLAG00001017	AFLA_082370	0	0	0	0	0	0	0	0	0	0	0	1		0	0	0	0	0	0	0	0	0	0	0	0.74241
CADAFLAG00001018	AFLA_082380	2	0	0	1	5	3	0	0	0	2	2	3		87.2484	0	0	0.787127	0.270478	0.189356	0	0	0	0.502393	0.746328	1.33099
CADAFLAG00001019	AFLA_082390	0	0	131	268	1160	1012	0	0	205	895	1072	780		0	0	87.9896	88.0281	26.1855	26.6551	0	0	50.7995	93.8163	166.931	144.407
CADAFLAG00001020	AFLA_082400	0	2	22	37	281	253	0	0	35	97	76	30		0	24.5857	7.79376	6.40991	3.3456	3.51467	0	0	4.57444	5.36279	6.24193	2.9294
CADAFLAG00001021	AFLA_082410	0	0	28	31	660	599	0	0	64	103	117	104		0	0	43.8829	23.7588	34.7635	36.8132	0	0	37.0052	25.1924	42.5112	44.9267
CADAFLAG00001022	AFLA_082420	0	0	0	0	9	3	0	0	1	2	1	1		0	0	0	0	2.25173	0.875774	0	0	2.74648	2.32357	1.72588	2.05194
CADAFLAG00001023	AFLA_082430	0	0	0	7	68	68	0	0	13	10	4	4		0	0	0	4.38946	2.93048	3.41929	0	0	6.15001	2.00116	1.18913	1.41378
CADAFLAG00001024	AFLA_082440	0	0	0	0	2	2	0	0	0	0	0	0		0	0	0	0	0.125532	0.146471	0	0	0	0	0	0
CADAFLAG00001025	AFLA_082450	0	0	0	0	0	0	0	0	0	1	0	0		0	0	0	0	0	0	0	0	0	0.19544	0	0
CADAFLAG00001026	AFLA_082460	0	0	1	1	48	42	0	0	6	15	13	15		0	0	2.26159	1.10596	3.64837	3.72481	0	0	5.00624	5.29421	6.81615	9.35061
CADAFLAG00001027	AFLA_082470	0	0	1	0	1	2	0	0	0	0	0	1		0	0	0.910013	0	0.0305838	0.0713703	0	0	0	0	0	0.250831
CADAFLAG00001028	AFLA_082480	0	0	0	0	0	0	0	0	0	0	0	0		0	0	0	0	0	0	0	0	0	0	0	0
CADAFLAG00001029	AFLA_082490	0	0	1	2	30	28	0	0	5	4	5	5		0	0	1.12133	1.09671	1.13058	1.23121	0	0	2.06848	0.699987	1.29983	1.54539
CADAFLAG00001030	AFLA_082500	0	3	46	101	803	680	0	0	69	207	61	39		0	132.851	58.7045	63.032	34.4407	34.0301	0	0	32.4869	41.2267	18.0478	13.7187
CADAFLAG00001031	AFLA_082510	43	20	554	1062	15513	14063	0	0	1134	3184	1760	1615		3589.97	2137.83	1706.57	1599.8	1606.03	1698.76	0	0	1288.76	1530.67	1256.92	1371.26
CADAFLAG00001032	AFLA_082520	0	3	9	32	607	498	0	0	62	82	67	37		0	47.8673	4.13839	7.19556	9.38038	8.97962	0	0	10.5178	5.88434	7.1424	4.68948
CADAFLAG00001033	AFLA_082530	3	1	31	62	678	644	0	0	60	154	87	69		163.837	69.9215	62.4659	61.0941	45.915	50.8871	0	0	44.6045	48.4281	40.6426	38.3234
CADAFLAG00001034	AFLA_082540	1	0	18	14	121	112	0	0	14	42	27	26		31.7874	0	21.1115	8.02973	4.76953	5.15116	0	0	6.05788	7.6876	7.34161	8.40532
CADAFLAG00001035	AFLA_082550	2	1	40	80	1194	988	0	0	144	266	143	128		33.3567	21.3537	24.6153	24.0747	24.6941	23.842	0	0	32.6929	25.5459	20.4015	21.7114
CADAFLAG00001036	AFLA_082560	2	1	33	63	1111	1022	0	0	120	217	170	108		51.6052	33.0357	31.4173	29.3306	35.5477	38.1545	0	0	42.1485	32.2411	37.5219	28.3408
CADAFLAG00001037	AFLA_082570	0	1	35	60	1452	1158	1	0	122	222	172	130		0	28.7023	28.9505	24.2698	40.3643	37.561	525.437	0	37.23	28.6573	32.9836	29.6391
CADAFLAG00001038	AFLA_082580	0	1	13	19	332	330	0	0	35	71	54	36		0	33.5119	12.5549	8.97325	10.7758	12.4975	0	0	12.4705	10.701	12.0905	9.58311
CADAFLAG00001039	AFLA_082590	5	0	43	86	661	583	0	0	66	144	72	78		158.821	0	50.3963	49.2896	26.036	26.7941	0	0	28.5378	26.3383	19.5634	25.1976
CADAFLAG00001040	AFLA_082600	0	4	14	28	438	285	0	0	38	95	39	22		0	99.861	10.0724	9.85124	10.5907	8.04066	0	0	10.0864	10.6666	6.50508	4.36278
CADAFLAG00001041	AFLA_082610	0	0	0	0	2	1	0	0	0	0	0	0		0	0	0	0	0.35671	0.208105	0	0	0	0	0	0
CADAFLAG00001042	AFLA_082620	0	0	9	8	387	330	0	0	19	66	75	48		0	0	17.7352	7.70922	25.63	25.5005	0	0	13.8132	20.2971	34.2639	26.0717
CADAFLAG00001043	AFLA_082630	0	0	1	1	19	23	0	0	2	2	3	3		0	0	7.30906	3.57427	4.66722	6.59219	0	0	5.39309	2.28132	5.08351	6.04389
CADAFLAG00001044	AFLA_082640	0	0	0	0	0	0	0	0	0	0	0	0		0	0	0	0	0	0	0	0	0	0	0	0
CADAFLAG00001045	AFLA_082650	0	0	0	0	0	1	0	0	0	0	0	0		0	0	0	0	0	0.0840743	0	0	0	0	0	0
CADAFLAG00001046	AFLA_082660	0	0	0	0	0	0	0	0	0	0	0	0		0	0	0	0	0	0	0	0	0	0	0	0
CADAFLAG00001047	AFLA_082670	0	0	0	0	0	2	0	0	0	1	0	0		0	0	0	0	0	0.224797	0	0	0	0.447318	0	0
CADAFLAG00001048	AFLA_082680	0	1	12	45	766	652	0	0	58	98	66	50		0	71.8113	24.8339	45.5409	53.2764	52.9116	0	0	44.283	31.6508	31.6656	28.5212
CADAFLAG00001049	AFLA_082690	1	1	25	61	586	522	0	0	53	124	75	60		19.9545	25.5482	18.4065	21.9628	14.5001	15.071	0	0	14.3964	14.2478	12.8019	12.1763
CADAFLAG00001050	AFLA_082700	0	0	11	18	221	199	0	0	21	50	15	22		0	0	15.5567	12.4487	10.5041	11.0361	0	0	10.9569	11.0354	4.91809	8.57591
CADAFLAG00001051	AFLA_082710	1	0	26	47	723	641	0	0	85	204	135	98		40.0189	0	38.391	33.9376	35.8788	37.1154	0	0	46.3043	47.0091	46.2137	39.8856
CADAFLAG00001052	AFLA_082720	2	4	35	120	1086	888	0	0	84	211	142	97		66.7902	171.026	43.1263	72.3072	44.9725	42.9069	0	0	38.1855	40.5743	40.5642	32.9442
CADAFLAG00001053	AFLA_082730	0	0	9	20	181	129	0	0	20	53	25	32		0	0	6.85225	7.4464	4.6314	3.85141	0	0	5.6178	6.2974	4.41277	6.71544
CADAFLAG00001054	AFLA_082740	0	0	1	1	38	42	0	0	6	7	8	7		0	0	0.679338	0.33221	0.867586	1.11886	0	0	1.50378	0.742128	1.25996	1.31074
CADAFLAG00001055	AFLA_082750	0	0	1	1	77	93	0	0	30	46	49	43		0	0	1.07414	0.525277	2.77969	3.91729	0	0	11.8886	7.71108	12.2022	12.7311
CADAFLAG00001056	AFLA_082760	1	0	34	84	732	523	0	0	64	248	270	212		29.5863	0	37.1159	44.8422	26.8557	22.3884	0	0	25.7755	42.2501	68.3323	63.7898
CADAFLAG00001057	AFLA_082770	0	0	1	0	0	1	0	0	0	0	0	0		0	0	4.12306	0	0	0.161681	0	0	0	0	0	0
CADAFLAG00001058	AFLA_082780	0	0	0	0	1	2	0	0	0	0	0	1		0	0	0	0	0.109175	0.25477	0	0	0	0	0	0.895392
CADAFLAG00001059	AFLA_082790	0	0	8	20	1599	1331	0	0	82	69	66	73		0	0	9.16236	11.2014	61.5473	59.7772	0	0	34.6479	12.3328	17.5244	23.0449
CADAFLAG00001060	AFLA_082800	0	0	0	0	4	1	0	0	0	0	0	0		0	0	0	0	1.04428	0.304617	0	0	0	0	0	0
CADAFLAG00001061	AFLA_082810	2	2	114	220	2929	2545	0	0	321	858	509	360		68.3617	87.5252	143.774	135.682	124.147	125.864	0	0	149.357	168.871	148.824	125.144
CADAFLAG00001062	AFLA_082820	0	2	31	71	1265	975	0	0	92	233	141	97		0	39.2801	17.5459	19.6516	24.0628	21.64	0	0	19.2109	20.5809	18.5018	15.1328
CADAFLAG00001063	AFLA_082830	0	0	0	0	13	5	0	0	3	1	1	0		0	0	0	0	3.44382	1.54548	0	0	8.72411	1.23012	1.82741	0
CADAFLAG00001064	AFLA_082840	0	0	0	0	0	1	0	0	0	0	0	0		0	0	0	0	0	0.412129	0	0	0	0	0	0
CADAFLAG00001065	AFLA_082850	0	0	2	5	131	95	0	0	49	35	35	21		0	0	2.54027	3.10561	5.59197	4.73167	0	0	22.9611	6.93767	10.3062	7.35197
CADAFLAG00001066	AFLA_082860	0	0	0	0	2	0	0	0	0	3	0	1		0	0	0	0	0.391605	0	0	0	0	2.72767	0	1.60587
CADAFLAG00001067	AFLA_082870	0	0	1	5	39	26	0	0	2	10	11	5		0	0	2.97777	7.28093	3.903	3.03602	0	0	2.19718	4.64714	7.59389	4.10388
CADAFLAG00001068	AFLA_082880	0	0	4	3	68	36	0	0	2	12	4	6		0	0	31.5293	11.5638	18.0138	11.1275	0	0	5.81607	14.7615	7.30963	13.0358
CADAFLAG00001069	AFLA_082890	7	5	241	375	2896	2522	0	2	293	892	431	324		324.882	297.11	412.701	314.034	166.671	169.357	0	1194.57	185.111	238.385	171.111	152.932
CADAFLAG00001070	AFLA_082900	0	0	7	29	347	268	0	0	19	52	45	23		0	0	10.569	21.4121	17.6079	15.8675	0	0	10.5836	12.2527	15.7517	9.57186
CADAFLAG00001071	AFLA_082910	0	0	2	2	76	57	0	0	4	11	4	7		0	0	3.54965	1.73585	4.53328	3.96708	0	0	2.61916	3.0468	1.64588	3.42443
CADAFLAG00001072	AFLA_082920	0	0	1	5	79	63	0	0	8	8	10	7		0	0	2.51642	6.1529	6.68119	6.21676	0	0	7.4271	3.14173	5.83397	4.85529
CADAFLAG00001073	AFLA_082930	0	1	2	10	188	161	0	0	37	31	36	34		0	59.4221	3.42491	8.37423	10.8198	10.8115	0	0	23.3758	8.28467	14.2923	16.0484
CADAFLAG00001074	AFLA_082940	0	0	0	0	0	0	0	0	0	0	0	0		0	0	0	0	0	0	0	0	0	0	0	0
CADAFLAG00001075	AFLA_082950	1	0	5	15	129	123	0	0	25	52	37	55		65.7324	0	12.1266	17.7905	10.5149	11.6981	0	0	22.3695	19.682	20.8043	36.7678
CADAFLAG00001076	AFLA_082960	2	0	8	14	196	174	0	0	31	61	43	29		117.626	0	17.3603	14.8566	14.2944	14.8066	0	0	24.8184	20.6581	21.6329	17.3459
CADAFLAG00001077	AFLA_082970	0	0	6	1	162	155	0	0	11	23	19	11		0	0	7.42722	0.605343	6.73959	7.52397	0	0	5.02358	4.44322	5.45268	3.7532
CADAFLAG00001078	AFLA_082980	2	0	36	63	1171	1005	0	0	84	241	123	127		79.8179	0	53.0108	45.3658	57.9511	58.032	0	0	45.6338	55.3826	41.9902	51.5465
CADAFLAG00001079	AFLA_082990	1	1	6	15	390	296	0	0	23	62	32	35		43.1064	55.1903	9.54299	11.6668	20.8469	18.4614	0	0	13.4961	15.3893	11.7995	15.3439
CADAFLAG00001080	AFLA_083000	0	0	1	2	78	42	0	0	4	6	6	3		0	0	1.84192	1.80147	4.82845	3.03361	0	0	2.71816	1.72471	2.56214	1.52309
CADAFLAG00001081	AFLA_083010	0	0	1	1	21	27	0	0	3	7	4	3		0	0	2.65345	1.29759	1.87273	2.80941	0	0	2.93683	2.89871	2.46067	2.19415
CADAFLAG00001082	AFLA_083020	0	0	16	18	188	132	0	0	29	43	39	15		0	0	41.0333	22.5744	16.2038	13.2749	0	0	27.4385	17.21	23.1879	10.6033
CADAFLAG00001083	AFLA_083030	1	0	6	16	217	183	0	0	11	29	21	16		30.5829	0	6.7705	8.82908	8.22948	8.09768	0	0	4.57939	5.10696	5.49376	4.97649
CADAFLAG00001084	AFLA_083040	0	1	13	14	225	182	0	0	25	30	37	35		0	37.9574	14.2204	7.48896	8.27166	7.8069	0	0	10.0891	5.12133	9.38317	10.5528
CADAFLAG00001085	AFLA_083050	50	29	840	1893	19585	17850	1	1	1529	5369	2588	2521		8070.48	5993.05	5002.65	5513.12	3920.01	4168.68	3783.15	2077.23	3359.49	4990.1	3573.27	4138.35
CADAFLAG00001086	AFLA_083060	1	0	71	103	1246	1141	0	0	78	270	145	112		57.8759	0	151.617	107.56	89.4233	95.5465	0	0	61.4511	89.9804	71.7858	65.9236
CADAFLAG00001087	AFLA_083070	0	1	24	42	504	421	0	0	59	146	63	61		0	49.8636	34.4878	29.5141	24.3404	23.7234	0	0	31.2789	32.7418	20.9882	24.1612
CADAFLAG00001088	AFLA_083080	4	2	54	130	1183	1025	0	0	160	465	238	222		110.47	70.7191	55.0264	64.7809	40.514	40.9582	0	0	60.151	73.9478	56.2257	62.354
CADAFLAG00001089	AFLA_083090	0	0	26	67	1086	894	1	1	113	213	122	100		0	0	12.8917	16.2457	18.0972	17.3826	314.971	172.942	20.671	16.4821	14.0242	13.6669
CADAFLAG00001090	AFLA_083100	3	7	140	293	5673	4694	0	0	432	963	636	483		70.633	211.011	121.62	124.472	165.628	159.905	0	0	138.455	130.557	128.09	115.654
CADAFLAG00001091	AFLA_083110	0	0	2	2	830	763	0	0	796	95	407	396		0	0	12.6117	6.16738	175.9	188.673	0	0	1851.84	93.4895	595.003	688.293
CADAFLAG00001092	AFLA_083120	2	1	122	169	8124	7354	0	1	543	895	671	687		264.125	169.083	594.47	402.702	1330.4	1405.19	0	1699.55	976.149	680.594	758.008	922.701
CADAFLAG00001093	AFLA_083130	1	0	5	12	685	563	0	0	43	38	75	44		22.0438	0	4.06675	4.77293	18.7245	17.9567	0	0	12.903	4.82343	14.1423	9.86425
CADAFLAG00001094	AFLA_083140	0	0	4	4	105	68	0	0	10	13	9	13		0	0	3.07015	1.50137	2.70852	2.04668	0	0	2.83169	1.55718	1.60149	2.75028
CADAFLAG00001095	AFLA_083150	0	0	1	1	21	19	0	0	2	8	2	3		0	0	3.19046	1.5602	2.25173	2.3771	0	0	2.35412	3.98326	1.47933	2.63821
CADAFLAG00001096	AFLA_083160	1	0	52	83	1487	1293	0	0	109	282	222	178		19.5956	0	37.597	29.3463	36.133	36.6596	0	0	29.0751	31.8195	37.212	35.4734
CADAFLAG00001097	AFLA_083170	1	0	21	38	771	651	0	1	82	129	93	71		21.4577	0	16.6262	14.7124	20.515	20.2114	0	276.146	23.9516	15.9389	17.0702	15.4941
CADAFLAG00001098	AFLA_083180	2	1	30	87	700	588	0	0	52	100	72	62		37.0111	23.6931	20.484	29.0495	16.0633	15.7438	0	0	13.0991	10.6559	11.3974	11.6686
CADAFLAG00001099	AFLA_083190	1	0	18	59	1090	935	0	0	79	127	90	120		59.5363	0	39.5408	63.3799	80.4716	80.5425	0	0	64.0245	43.5383	45.8349	72.6588
CADAFLAG00001100	AFLA_083200	2	0	15	17	254	183	0	0	36	33	33	30		83.7283	0	23.1699	12.8413	13.1859	11.0847	0	0	20.5155	7.95504	11.8176	12.7729
CADAFLAG00001101	AFLA_083210	0	0	4	11	203	189	0	0	30	39	39	46		0	0	9.36241	12.5906	15.9686	17.3472	0	0	25.9057	14.2458	21.1628	29.6769
CADAFLAG00001102	AFLA_083220	0	1	9	10	149	122	0	1	14	19	22	18		0	43.5576	11.2974	6.13849	6.28586	6.0053	0	437.824	6.48349	3.72206	6.40234	6.2279
CADAFLAG00001103	AFLA_083230	16	6	178	450	3484	3073	1	0	349	1259	536	504		839.097	402.869	344.432	425.816	226.571	233.177	1229.18	0	249.146	380.193	240.452	268.811
CADAFLAG00001104	AFLA_083240	2	0	208	584	3375	2799	0	1	277	947	873	667		75.8583	0	291.09	399.672	158.738	153.606	0	488.122	143.018	206.828	283.243	257.291
CADAFLAG00001105	AFLA_083250	0	0	1	0	2	4	0	0	0	0	0	0		0	0	1.22935	0	0.0826323	0.192831	0	0	0	0	0	0
CADAFLAG00001106	AFLA_083260	0	0	11	15	223	156	0	0	26	49	35	25		0	0	19.2889	12.8627	13.142	10.727	0	0	16.8203	13.4093	14.2287	12.0834
CADAFLAG00001107	AFLA_083270	2	0	21	55	703	620	0	0	55	150	35	25		54.1038	0	20.9608	26.8459	23.5824	24.2672	0	0	20.2534	23.3655	8.09912	6.87801
CADAFLAG00001108	AFLA_083280	0	0	1	3	36	22	0	0	4	5	1	2		0	0	5.58331	8.19105	6.75519	4.81675	0	0	8.23944	4.35669	1.29441	3.07791
CADAFLAG00001109	AFLA_083290	0	1	1	5	109	100	0	1	11	19	15	14		0	51.6642	1.48888	3.64046	5.45419	5.83849	0	519.308	6.04225	4.41478	5.17765	5.74543
CADAFLAG00001110	AFLA_083300	0	0	8	27	962	881	0	0	63	116	86	92		0	0	4.88381	8.06044	19.7373	21.0904	0	0	14.1891	11.0515	12.1716	15.4807
CADAFLAG00001111	AFLA_083310	1	1	4	13	206	188	0	0	13	41	32	26		43.7556	56.0214	6.45781	10.2635	11.1773	11.9021	0	0	7.74309	10.3301	11.9772	11.57
CADAFLAG00001112	AFLA_083320	0	0	8	12	321	222	0	0	16	35	31	14		0	0	8.16759	5.99116	11.0142	8.88785	0	0	6.02656	5.57656	7.33747	3.93972
CADAFLAG00001113	AFLA_083330	0	3	53	83	2203	1694	0	0	133	350	238	163		0	72.3701	36.8455	28.2171	51.4714	46.1809	0	0	34.1119	37.9727	38.3589	31.2342
CADAFLAG00001114	AFLA_083340	3	2	32	41	476	395	0	0	48	132	59	53		82.6956	70.5849	32.5464	20.3921	16.2706	15.754	0	0	18.0111	20.9518	13.9119	14.8581
CADAFLAG00001115	AFLA_083350	0	1	11	29	530	429	0	0	36	82	66	44		0	48.8166	15.475	19.9509	25.0586	23.6666	0	0	18.6847	18.0031	21.526	17.0618
CADAFLAG00001116	AFLA_083360	2	1	110	328	3378	2668	0	1	235	1135	332	257		65.2893	41.7958	132.494	193.198	136.743	126.017	0	420.114	104.428	213.351	92.709	85.3238
CADAFLAG00001117	AFLA_083370	10	7	200	378	4181	3379	0	0	372	1267	768	629		258.026	231.25	190.408	175.984	133.776	126.149	0	0	130.66	188.246	169.511	165.059
CADAFLAG00001118	AFLA_083380	0	1	29	45	1030	800	0	0	127	197	168	123		0	28.8806	24.1366	18.3154	28.8109	26.11	0	0	38.9966	25.5881	32.4166	28.2173
CADAFLAG00001119	AFLA_083390	0	0	1	1	15	6	0	0	2	1	0	2		0	0	4.58118	2.24029	2.30947	1.07788	0	0	3.38028	0.714944	0	2.52546
CADAFLAG00001120	AFLA_083400	2	2	14	43	694	617	0	0	127	125	132	81		49.1603	62.9412	12.6971	19.0709	21.1533	21.9432	0	0	42.4937	17.6921	27.7543	20.2486
CADAFLAG00001121	AFLA_083410	0	1	9	21	295	243	0	0	22	93	27	18		0	28.4971	7.39119	8.43368	8.14211	7.82561	0	0	6.66561	11.9193	5.14063	4.07453
CADAFLAG00001122	AFLA_083420	0	0	17	14	199	158	0	0	26	74	32	25		0	0	14.5326	5.85261	5.71731	5.29654	0	0	8.20001	9.87239	6.342	5.89073
CADAFLAG00001123	AFLA_083430	0	1	90	160	2976	2451	0	0	252	496	388	309		0	21.0874	54.6937	47.5489	60.7814	58.4087	0	0	56.499	47.0404	54.6647	51.7591
CADAFLAG00001124	AFLA_083440	0	1	29	66	1058	1027	0	0	138	263	221	187		0	59.6125	49.8203	55.4471	61.0854	69.1861	0	0	87.4648	70.5114	88.0201	88.5491
CADAFLAG00001125	AFLA_083450	0	0	4	14	327	296	0	0	18	27	33	24		0	0	6.1609	10.5448	16.9268	17.8779	0	0	10.2283	6.48997	11.7836	10.1889
CADAFLAG00001126	AFLA_083460	1	0	4	3	150	147	0	0	11	14	18	8		25.2641	0	3.72868	1.36755	4.69926	5.37344	0	0	3.78298	2.03666	3.88999	2.05551
CADAFLAG00001127	AFLA_083470	38	18	532	1052	9299	8093	1	0	666	2639	1482	1314		8000.3	4851.94	4132.62	3996.28	2427.69	2465.26	4934.54	0	1908.68	3199.25	2668.97	2813.48
CADAFLAG00001128	AFLA_083480	1	2	28	100	1499	1239	0	0	90	233	123	123		19.8184	50.7479	20.4747	35.759	36.8387	35.528	0	0	24.2799	26.5895	20.8519	24.7912
CADAFLAG00001129	AFLA_083490	1	0	69	87	193	130	0	0	25	448	10	12		42.2292	0	107.511	66.2903	10.1066	7.94306	0	0	14.3711	108.938	3.61231	5.15371
CADAFLAG00001130	AFLA_083500	1	0	1	7	137	119	0	0	4	17	14	14		21.0942	0	0.778313	2.66427	3.58358	3.63196	0	0	1.14858	2.06489	2.52617	3.00342
CADAFLAG00001131	AFLA_083510	0	0	6	20	288	240	0	0	31	49	60	39		0	0	5.22925	8.52401	8.43575	8.20237	0	0	9.96771	6.66467	12.1233	9.36885
CADAFLAG00001132	AFLA_083520	0	0	27	32	1606	1393	0	0	152	215	251	188		0	0	15.298	8.86642	30.5816	30.9502	0	0	31.7732	19.011	32.9706	29.3605
CADAFLAG00001133	AFLA_083530	2	0	17	29	444	397	0	0	37	105	53	33		75.2687	0	23.6061	19.6925	20.7206	21.6175	0	0	18.955	22.7541	17.0621	12.6306
CADAFLAG00001134	AFLA_083540	1	5	76	139	3068	2359	0	0	186	393	283	278		14.8536	95.0875	41.6522	37.2533	56.5097	50.6982	0	0	37.6082	33.6133	35.9577	41.9955
CADAFLAG00001135	AFLA_083550	11	2	72	165	1946	1683	0	0	162	508	249	220		309.082	71.9502	74.6457	83.6532	67.8045	68.4221	0	0	61.9631	82.1923	59.8484	62.8679
CADAFLAG00001136	AFLA_083560	0	1	12	9	252	206	0	0	15	22	29	16		0	37.8031	13.0731	4.79476	9.2266	8.80046	0	0	6.02886	3.74038	7.32448	4.80454
CADAFLAG00001137	AFLA_083570	0	0	3	6	136	109	0	0	13	30	21	13		0	0	5.58331	5.4607	8.50653	7.95494	0	0	8.92606	8.71338	9.06089	6.6688
CADAFLAG00001138	AFLA_083580	1	2	18	52	287	230	0	0	36	107	51	51		31.9272	81.7544	21.2043	29.9558	11.3626	10.6248	0	0	15.6459	19.6712	13.9285	16.5598
CADAFLAG00001139	AFLA_083590	4	2	143	272	1882	1628	0	0	176	1097	137	136		142.42	91.1721	187.862	174.742	83.0932	83.8682	0	0	85.3024	224.908	41.7258	49.2465
CADAFLAG00001140	AFLA_083600	3	1	67	137	1883	1521	0	0	183	408	269	220		76.5915	32.6874	63.114	63.1099	59.6134	56.185	0	0	63.5986	59.9799	58.7468	57.1225
CADAFLAG00001141	AFLA_083610	0	0	3	4	55	54	1	0	7	9	5	6		0	0	5.99998	3.91214	3.69687	4.23508	1270.46	0	5.16502	2.80909	2.31835	3.3076
CADAFLAG00001142	AFLA_083620	0	0	31	38	630	532	0	0	84	127	86	105		0	0	31.8313	19.0811	21.7408	21.4212	0	0	31.8213	20.3513	20.4726	29.7177
CADAFLAG00001143	AFLA_083630	1	0	16	37	564	419	0	0	28	102	52	30		48.4229	0	28.5866	32.3273	33.866	29.3559	0	0	18.4563	28.4405	21.539	14.774
CADAFLAG00001144	AFLA_083640	13	8	97	275	2459	2163	0	0	220	1025	489	417		517.395	407.652	142.443	197.483	121.359	124.557	0	0	119.19	234.903	166.479	168.787
CADAFLAG00001145	AFLA_083650	0	1	8	20	193	169	0	0	19	31	23	18		0	43.0535	9.92589	12.1349	8.04785	8.22254	0	0	8.69718	6.00255	6.61589	6.15582
CADAFLAG00001146	AFLA_083660	5	4	68	162	1661	1348	0	0	187	465	286	249		133.765	137.01	67.1231	78.1996	55.1031	52.1787	0	0	68.1005	71.6327	65.4501	67.748
CADAFLAG00001147	AFLA_083670	0	0	2	2	45	31	0	0	4	8	9	4		0	0	18.8069	9.19696	14.2214	11.4311	0	0	13.8769	11.7401	19.6206	10.3677
CADAFLAG00001148	AFLA_083680	1	0	17	67	812	646	0	0	51	197	103	75		23.1319	0	14.5095	27.9643	23.2918	21.621	0	0	16.059	26.24	20.3808	17.6441
CADAFLAG00001149	AFLA_083690	0	1	24	25	525	488	0	0	51	121	84	84		0	54.2248	37.5042	19.1045	27.5722	29.904	0	0	29.4025	29.5086	30.4319	36.1811
CADAFLAG00001150	AFLA_083700	0	0	2	1	23	27	0	0	0	2	0	2		0	0	3.03395	0.74183	1.1726	1.60614	0	0	0	0.473482	0	0.836262
CADAFLAG00001151	AFLA_083710	0	0	1	0	24	26	0	0	2	3	2	2		0	0	3.5263	0	2.84429	3.59528	0	0	2.60193	1.65096	1.63505	1.94394
CADAFLAG00001152	AFLA_083720	0	0	8	8	134	108	0	0	13	13	11	11		0	0	22.6877	11.0947	12.7717	12.0106	0	0	13.6016	5.7536	7.23227	8.5986
CADAFLAG00001153	AFLA_083730	0	0	9	11	137	99	0	0	6	13	17	6		0	0	11.3773	6.80011	5.82051	4.90764	0	0	2.7983	2.56469	4.98227	2.09065
CADAFLAG00001154	AFLA_083740	61	17	413	1042	8465	7187	1	0	701	2523	1185	1224		6764.42	2413.63	1689.83	2084.9	1164.02	1153.13	2599.11	0	1058.17	1611.03	1124.06	1380.41
CADAFLAG00001155	AFLA_083750	7	7	92	167	2578	2031	0	0	233	535	332	222		116.481	149.134	56.4855	50.1408	53.1955	48.8989	0	0	52.7777	51.2622	47.2572	37.5695
CADAFLAG00001156	AFLA_083760	0	0	8	20	582	448	0	0	56	105	58	54		0	0	5.16003	6.30839	12.6162	11.3313	0	0	13.3259	10.5693	8.67303	9.60041
CADAFLAG00001157	AFLA_083770	0	0	4	7	181	168	0	0	13	41	20	11		0	0	3.48051	2.97856	5.29303	5.73234	0	0	4.17322	5.56751	4.03453	2.63821
CADAFLAG00001158	AFLA_083780	0	0	0	0	5	6	0	0	0	0	0	0		0	0	0	0	0.958183	1.34161	0	0	0	0	0	0
CADAFLAG00001159	AFLA_083790	0	0	8	10	241	230	0	0	20	49	22	21		0	0	14.9407	9.13287	15.1266	16.8441	0	0	13.7802	14.2814	9.52543	10.8102
CADAFLAG00001160	AFLA_083800	0	0	5	3	130	104	0	0	13	17	6	8		0	0	7.74563	2.27266	6.7682	6.31772	0	0	7.42978	4.1099	2.15486	3.41594
CADAFLAG00001161	AFLA_083810	0	0	8	17	801	686	0	0	56	65	42	33		0	0	2.55389	2.65392	8.59385	8.58769	0	0	6.59548	3.23833	3.10844	2.90376
CADAFLAG00001162	AFLA_083820	0	1	4	12	409	346	0	0	29	60	38	28		0	63.6956	7.34244	10.7718	25.2317	24.9056	0	0	19.6392	17.188	16.1713	14.1668
CADAFLAG00001163	AFLA_083830	0	0	0	2	15	9	0	0	2	0	5	1		0	0	0	3.31789	1.71017	1.19726	0	0	2.50312	0	3.93239	0.935061
CADAFLAG00001164	AFLA_083840	0	0	2	1	206	166	0	0	9	4	17	16		0	0	1.47861	0.361536	5.11841	4.81253	0	0	2.45478	0.461509	2.91377	3.26046
CADAFLAG00001165	AFLA_083850	0	0	9	13	345	295	0	0	59	89	92	92		0	0	18.4121	13.0056	23.7205	23.6659	0	0	44.5307	28.4149	43.6346	51.878
CADAFLAG00001166	AFLA_083860	1	0	40	60	1302	1151	0	0	112	242	171	130		103.027	0	152.056	111.538	166.341	171.577	0	0	157.075	143.567	150.703	136.214
CADAFLAG00001167	AFLA_083870	0	3	28	45	1025	860	0	0	83	153	127	106		0	201.434	54.1803	42.5816	66.6577	65.2562	0	0	59.2526	46.2029	56.9729	56.5357
CADAFLAG00001168	AFLA_083880	12	5	234	533	3898	3480	1	0	473	1397	758	737		1001.85	534.457	720.825	802.911	403.551	420.371	1956.8	0	537.552	671.591	541.332	625.771
CADAFLAG00001169	AFLA_083890	0	0	109	340	5804	5183	0	0	500	1581	693	660		0	0	169.344	258.315	303.05	315.766	0	0	286.589	383.328	249.608	282.632
CADAFLAG00001170	AFLA_083900	3	1	42	122	909	763	0	0	83	150	121	99		66.3327	28.3092	34.2647	48.6725	24.9232	24.4097	0	0	24.9817	19.0978	22.8857	22.2621
CADAFLAG00001171	AFLA_083910	0	0	4	9	183	166	0	0	28	25	43	35		0	0	7.41866	8.1627	11.4067	12.0729	0	0	19.1588	7.23603	18.4891	17.8923
CADAFLAG00001172	AFLA_083920	6	8	195	420	8419	6930	1	0	537	1190	862	664		205.085	350.101	245.928	259.03	356.843	342.726	801.138	0	249.858	234.216	252.036	230.821
CADAFLAG00001173	AFLA_083930	1	3	35	48	977	866	1	0	74	143	112	110		16.6021	63.7684	21.4399	14.3788	20.1137	20.8024	389.124	0	16.7237	13.6705	15.9057	18.573
CADAFLAG00001174	AFLA_083940	1	0	15	20	510	401	0	0	26	66	36	32		13.7826	0	7.62805	4.97369	8.71637	7.99663	0	0	4.878	5.23795	4.2443	4.48545
CADAFLAG00001175	AFLA_083950	1	1	27	19	827	679	0	0	53	92	176	142		17.8317	22.8303	17.7643	6.11312	18.2865	17.5183	0	0	12.8648	9.44639	26.8458	25.7517
CADAFLAG00001176	AFLA_083960	0	0	0	0	11	8	0	0	1	0	1	3		0	0	0	0	3.53843	3.00265	0	0	3.53119	0	2.21899	7.91462
CADAFLAG00001177	AFLA_083970	0	0	2	0	51	51	0	0	2	15	8	8		0	0	12.9156	0	11.0687	12.915	0	0	4.76498	15.1172	11.9772	14.24
CADAFLAG00001178	AFLA_083980	0	2	19	42	538	471	0	0	94	122	113	93		0	67.5104	18.4827	19.9796	17.5888	17.9669	0	0	33.7353	18.5211	25.4842	24.9361
CADAFLAG00001179	AFLA_083990	0	0	2	6	108	105	0	0	11	8	6	4		0	0	1.93501	2.83877	3.51172	3.98366	0	0	3.92637	1.20792	1.34582	1.06671
CADAFLAG00001180	AFLA_084000	0	0	3	8	144	105	0	0	8	21	26	15		0	0	2.34744	3.06118	3.78685	3.22182	0	0	2.30945	2.56441	4.71658	3.23517
CADAFLAG00001181	AFLA_084010	0	0	9	11	167	119	0	0	12	22	29	29		0	0	36.2705	21.6786	22.6189	18.8061	0	0	17.8418	13.8366	27.0951	32.2139
CADAFLAG00001182	AFLA_084020	0	2	25	82	1943	1572	0	0	99	282	208	154		0	43.3041	15.5995	25.0213	40.7461	38.4647	0	0	22.7903	27.4608	30.0894	26.4865
CADAFLAG00001183	AFLA_084030	0	1	23	73	1719	1432	0	0	125	279	165	171		0	51.6642	34.2443	53.1508	86.0161	83.6072	0	0	68.662	64.8276	56.9542	70.1763
CADAFLAG00001184	AFLA_084040	0	0	0	2	41	32	0	0	3	1	4	2		0	0	0	4.00173	5.63792	5.13431	0	0	4.52855	0.638538	3.79431	2.25557
CADAFLAG00001185	AFLA_084050	0	0	19	21	462	409	0	0	27	88	44	43		0	0	28.877	15.6079	23.5985	24.376	0	0	15.1394	20.8726	15.5036	18.0136
CADAFLAG00001186	AFLA_084060	0	0	1	2	51	44	0	0	3	7	2	3		0	0	6.02245	5.89019	10.3225	10.3912	0	0	6.66561	6.57909	2.79244	4.97999
CADAFLAG00001187	AFLA_084070	0	0	1	6	70	66	0	0	3	11	7	5		0	0	2.07751	6.09566	4.88747	5.37684	0	0	2.29938	3.56641	3.37149	2.86317
CADAFLAG00001188	AFLA_084080	0	0	0	0	1	0	0	0	1	0	0	1		0	0	0	0	0.0619032	0	0	0	0.679541	0	0	0.507696
CADAFLAG00001189	AFLA_084090	0	0	1	0	56	44	0	0	5	8	8	4		0	0	0.849442	0	1.59869	1.46564	0	0	1.56693	1.06052	1.57545	0.936543
CADAFLAG00001190	AFLA_084100	0	0	0	1	12	14	0	0	1	0	4	4		0	0	0	1.48928	1.22822	1.67193	0	0	1.12356	0	2.82417	3.35772
CADAFLAG00001191	AFLA_084110	0	0	0	0	10	5	0	0	0	1	0	2		0	0	0	0	1.23382	0.719814	0	0	0	0.572935	0	2.02383
CADAFLAG00001192	AFLA_084120	0	0	0	0	11	10	0	0	2	2	3	5		0	0	0	0	1.31227	1.39196	0	0	2.61916	1.10793	2.46881	4.89204
CADAFLAG00001193	AFLA_084130	0	0	0	1	34	27	0	0	6	0	4	2		0	0	0	0.542678	1.26805	1.17495	0	0	2.45648	0	1.0291	0.611758
CADAFLAG00001194	AFLA_084140	0	1	7	14	351	292	0	0	38	54	76	63		0	41.4234	8.35631	8.1728	14.0821	13.6691	0	0	16.7358	10.0602	21.0335	20.7296
CADAFLAG00001195	AFLA_084150	2	0	36	78	1073	909	0	0	89	295	183	156		81.6116	0	54.202	57.4293	54.2945	53.6682	0	0	49.4366	69.3154	63.8771	64.7398
CADAFLAG00001196	AFLA_084160	3	2	69	149	3784	3006	0	0	210	447	365	307		198.094	169.083	168.108	177.522	309.838	287.19	0	0	188.758	169.958	206.165	206.164
CADAFLAG00001197	AFLA_084170	0	0	1	3	8	10	0	0	8	1	0	0		0	0	0.911561	1.33731	0.245086	0.357459	0	0	2.69043	0.142259	0	0
CADAFLAG00001198	AFLA_084180	0	0	2	3	19	22	0	0	6	4	10	6		0	0	15.9999	11.7364	5.1084	6.90162	0	0	17.7086	4.99394	18.5468	13.2304
CADAFLAG00001199	AFLA_084190	0	0	14	33	449	354	0	0	40	140	87	86		0	0	10.7353	12.3745	11.5711	10.6446	0	0	11.316	16.7536	15.4663	18.1768
CADAFLAG00001200	AFLA_084200	0	1	14	23	571	514	0	0	45	95	39	41		0	38.0609	15.356	12.3369	21.0489	22.1082	0	0	18.2099	16.2618	9.91736	12.3956
CADAFLAG00001201	AFLA_084210	0	0	7	16	266	211	0	0	14	46	16	15		0	0	17.3703	19.4158	22.1837	20.532	0	0	12.8169	17.814	9.20471	10.2597
CADAFLAG00001202	AFLA_084220	1	1	38	63	899	760	0	0	69	248	129	95		54.6123	69.9215	76.5711	62.0795	60.8813	60.053	0	0	51.2951	77.988	60.2632	52.7641
CADAFLAG00001203	AFLA_084230	0	0	14	20	327	296	0	0	23	55	48	44		0	0	20.3912	14.2453	16.0069	16.9062	0	0	12.3592	12.5018	16.2083	17.6645
CADAFLAG00001204	AFLA_084240	0	1	37	87	1234	954	0	0	128	253	151	120		0	30.4904	32.5113	37.3834	36.4411	32.8717	0	0	41.4943	34.6935	30.7603	29.0635
CADAFLAG00001205	AFLA_084250	0	2	31	82	545	495	1	0	58	340	199	164		0	77.1747	34.4729	44.5919	20.3683	21.5855	706.397	0	23.7952	59.0051	51.3039	50.2682
CADAFLAG00001206	AFLA_084260	0	1	11	22	226	210	0	0	16	59	36	29		0	37.7264	11.9594	11.6967	8.25786	8.95314	0	0	6.41774	10.0107	9.07402	8.69056
CADAFLAG00001207	AFLA_084270	4	1	33	56	1420	1200	0	0	92	155	109	100		143.83	46.0374	43.782	36.3326	63.316	62.4314	0	0	45.0314	32.0928	33.5266	36.5692
CADAFLAG00001208	AFLA_084280	0	0	19	19	330	265	0	0	24	91	43	35		0	0	18.5163	9.05483	10.8083	10.1271	0	0	8.62894	13.84	9.71516	9.40161
CADAFLAG00001209	AFLA_084290	1	0	15	16	63	59	0	0	17	64	22	13		99.499	0	55.0683	28.7248	7.77309	8.4938	0	0	23.0253	36.6678	18.7247	13.1549
CADAFLAG00001210	AFLA_084310	0	0	0	4	14	11	0	0	4	12	2	2		0	0	0	19.7821	4.75837	4.36234	0	0	14.9243	18.9393	4.68919	5.57508
CADAFLAG00001211	AFLA_084320	0	0	1	0	14	5	0	0	0	7	2	2		0	0	3.69654	0	1.73927	0.724778	0	0	0	4.0382	1.71398	2.03779
CADAFLAG00001212	AFLA_084330	28	26	478	1006	8167	7363	0	0	824	2847	1453	1246		1299.53	1544.97	818.553	842.448	470.029	494.44	0	0	520.585	760.854	576.853	588.126
CADAFLAG00001213	AFLA_084340	0	0	5	6	125	86	0	0	28	18	27	24		0	0	4.66626	2.73827	3.9206	3.1473	0	0	9.64057	2.6216	5.84176	6.17368
CADAFLAG00001214	AFLA_084350	1	1	14	35	302	300	0	0	46	98	49	43		145.269	185.991	75.0397	91.7397	54.4018	63.0557	0	0	90.9634	81.9755	60.8892	63.528
CADAFLAG00001215	AFLA_084360	1	0	58	102	1144	838	0	0	123	298	206	179		45.1145	0	96.5462	83.0297	63.9995	54.7005	0	0	75.5367	77.4138	79.4978	82.1285
CADAFLAG00001216	AFLA_084370	0	1	40	45	631	556	0	1	104	250	259	208		0	52.2447	60.2245	33.1323	31.929	32.8267	0	525.143	57.7686	58.7419	90.4053	86.3198
CADAFLAG00001217	AFLA_084380	1	2	32	56	1199	911	0	0	68	168	138	86		46.7102	119.608	55.1509	47.1973	69.4488	61.5689	0	0	43.2372	45.1863	55.1395	40.854
CADAFLAG00001218	AFLA_084390	1	0	7	22	220	160	0	0	25	75	36	31		35.089	0	9.06277	13.9287	9.57257	8.12312	0	0	11.9412	15.1537	10.8055	11.0626
CADAFLAG00001219	AFLA_084400	0	2	24	54	604	475	0	0	66	165	93	107		0	244.725	84.6312	93.1192	71.5813	65.683	0	0	85.8636	90.8026	76.0297	104.001
CADAFLAG00001220	AFLA_084410	0	0	19	30	535	391	0	0	38	74	47	33		0	0	13.5066	10.4289	12.7817	10.8995	0	0	9.966	8.20953	7.74588	6.46606
CADAFLAG00001221	AFLA_084420	1	1	24	68	856	742	0	0	97	136	86	102		105.267	134.776	93.217	129.157	111.738	113.013	0	0	138.996	82.4362	77.4397	109.199
CADAFLAG00001222	AFLA_084430	0	0	0	0	0	0	0	0	0	0	0	0		0	0	0	0	0	0	0	0	0	0	0	0
CADAFLAG00001223	AFLA_084440	1	1	43	82	1326	1096	0	0	129	270	243	204		44.4246	56.878	70.4829	65.7288	73.0469	70.4475	0	0	78.0101	69.0675	92.3427	92.1678
CADAFLAG00001224	AFLA_084450	1	4	44	92	2064	1698	0	3	259	526	305	216		38.8419	198.921	63.0586	64.4771	99.4132	95.4265	0	1499.61	136.942	117.645	101.338	85.3255
CADAFLAG00001225	AFLA_084460	1	2	74	115	2923	2308	0	0	296	513	593	429		15.6371	40.0412	42.6952	32.4468	56.6786	52.2184	0	0	63.0064	46.1912	79.3201	68.2242
CADAFLAG00001226	AFLA_084470	0	0	1	3	104	96	0	0	8	16	13	9		0	0	1.3922	2.04244	4.86607	5.24099	0	0	4.10902	3.4763	4.19591	3.45365
CADAFLAG00001227	AFLA_084480	0	0	1	1	45	26	0	0	3	4	0	6		0	0	1.64922	0.806503	2.49422	1.68149	0	0	1.82535	1.02952	0	2.7275
CADAFLAG00001228	AFLA_084490	0	0	1	2	20	28	0	0	4	0	0	0		0	0	1.55813	1.52392	1.04732	1.71081	0	0	2.29938	0	0	0
CADAFLAG00001229	AFLA_084500	2	2	10	20	676	563	0	0	50	56	38	28		55.552	71.1247	10.2485	10.0235	23.2837	22.6261	0	0	18.905	8.95662	9.02871	7.90958
CADAFLAG00001230	AFLA_084510	1	1	0	12	45	45	0	0	9	17	8	6		16.396	20.9922	0	3.55007	0.914924	1.06753	0	0	2.00871	1.60499	1.12202	1.00049
CADAFLAG00001231	AFLA_084520	0	2	41	55	993	686	0	0	99	226	179	140		0	21.7406	12.8439	8.42562	10.4546	8.42708	0	0	11.4418	11.0488	13.0001	12.0886
CADAFLAG00001232	AFLA_084530	0	0	3	6	76	72	0	0	18	17	7	7		0	0	9.18854	8.98675	7.82315	8.64764	0	0	20.3396	8.12585	4.97055	5.90958
CADAFLAG00001233	AFLA_084540	3	2	42	121	1789	1482	0	0	125	368	208	181		76.8617	65.6053	39.7035	55.936	56.8373	54.9374	0	0	43.5949	54.2904	45.5852	47.162
CADAFLAG00001234	AFLA_084550	0	0	0	0	1	0	0	0	0	1	0	1		0	0	0	0	0.246765	0	0	0	0	1.14587	0	2.02383
CADAFLAG00001235	AFLA_084560	0	0	0	6	224	178	0	0	10	19	10	14		0	0	0	4.57175	11.7299	10.8759	0	0	5.74844	4.62012	3.61231	6.01266
CADAFLAG00001236	AFLA_084570	0	0	18	44	380	271	0	0	60	172	97	67		0	0	15.2658	18.2484	10.8311	9.01271	0	0	18.7734	22.7651	19.0721	15.6623
CADAFLAG00001237	AFLA_084580	0	0	17	33	391	292	1	0	33	79	36	34		0	0	18.4453	17.5096	14.2579	12.4239	689.238	0	13.2098	13.377	9.05565	10.1683
CADAFLAG00001238	AFLA_084590	1	1	67	156	1685	1460	0	1	127	470	236	184		14.7331	18.8632	36.4218	41.4703	30.7843	31.1228	0	189.605	25.4704	39.873	29.7426	27.5701
CADAFLAG00001239	AFLA_084600	2	0	6	32	582	434	0	0	46	86	62	58		112.611	0	12.4651	32.5102	40.6359	35.3568	0	0	35.2571	27.8828	29.8618	33.2128
CADAFLAG00001240	AFLA_084610	1	0	19	36	628	532	0	0	36	70	57	42		19.2664	0	13.5066	12.5147	15.0036	14.8301	0	0	9.44148	7.76577	9.39393	8.22953
CADAFLAG00001241	AFLA_084620	75	38	880	2293	19323	16938	1	0	1576	6154	2758	2178		5067.51	3287.29	2193.85	2795.47	1618.98	1655.87	1583.64	0	1449.53	2394.29	1594.04	1496.64
CADAFLAG00001242	AFLA_084630	3	4	72	102	2924	2182	0	0	205	412	345	212		23.3927	39.9337	20.7149	14.3508	28.2729	24.6176	0	0	21.7595	18.4987	23.0118	16.812
CADAFLAG00001243	AFLA_084640	1	0	27	49	569	524	1	0	63	102	87	79		35.174	0	35.041	31.0982	24.8181	26.6676	824.415	0	30.1647	20.6589	26.1766	28.2601
CADAFLAG00001244	AFLA_084650	6	2	470	903	8985	7821	0	1	1091	3268	1876	1727		352.879	150.6	1019.92	958.253	655.281	665.531	0	756.886	873.447	1106.73	943.8	1032.98
CADAFLAG00001245	AFLA_084660	3	4	124	330	2407	1974	0	0	245	1115	542	465		67.5668	115.343	103.045	134.105	67.2237	64.3266	0	0	75.113	144.602	104.42	106.51
CADAFLAG00001246	AFLA_084670	5	3	20	63	473	407	0	0	43	71	61	40		88.4705	67.9627	13.0572	20.1135	10.3783	10.4197	0	0	10.357	7.23391	9.23274	7.19803
CADAFLAG00001247	AFLA_084680	0	0	1	1	7	22	0	0	1	6	3	2		0	0	0.928939	0.454269	0.218539	0.801401	0	0	0.342715	0.869828	0.646085	0.512096
CADAFLAG00001248	AFLA_084690	1	0	1	11	119	125	0	0	17	33	11	16		82.539	0	3.04544	16.3821	12.1798	14.928	0	0	19.1005	15.6841	7.76648	13.4309
CADAFLAG00001249	AFLA_084700	1	3	71	124	3079	2337	0	0	181	454	364	242		7.36781	28.2996	19.3014	16.4846	28.1308	24.9131	0	0	18.1532	19.2611	22.941	18.1334
CADAFLAG00001250	AFLA_084710	1	2	76	150	1965	1707	1	0	202	455	395	374		24.9174	63.8049	69.8728	67.4391	60.7156	61.5415	584.02	0	68.5159	65.2831	84.1923	94.7763
CADAFLAG00001251	AFLA_084720	0	0	46	66	4722	4140	0	0	271	438	745	594		0	0	71.8831	50.4358	247.992	253.693	0	0	156.237	106.816	269.902	255.852
CADAFLAG00001252	AFLA_084730	6	6	88	257	2857	2510	0	0	194	733	321	259		125.052	160.107	67.6726	96.6473	73.8386	75.691	0	0	55.0399	87.9689	57.229	54.8989
CADAFLAG00001253	AFLA_084740	7	0	163	318	1470	1329	0	0	205	1100	375	296		807.048	0	693.394	661.524	210.161	221.696	0	0	321.73	730.264	369.832	347.071
CADAFLAG00001254	AFLA_084750	2	1	90	128	1848	1588	0	0	190	363	250	228		59.0523	37.8031	98.0484	68.1921	67.6617	67.8404	0	0	76.3655	61.7162	63.1421	68.4647
CADAFLAG00001255	AFLA_084760	1	0	75	108	2549	2119	0	0	215	393	314	252		28.54	0	78.9781	55.6154	90.2107	87.5017	0	0	83.5275	64.5852	76.6577	73.1442
CADAFLAG00001256	AFLA_084770	0	1	11	36	482	430	0	0	54	119	88	62		0	32.6682	10.3559	16.5739	15.2506	15.8747	0	0	18.7558	17.4839	19.207	16.0887
CADAFLAG00001257	AFLA_084780	0	1	131	264	3451	2827	0	0	288	898	545	415		0	30.3411	114.544	112.884	101.412	96.9323	0	0	92.9054	122.539	110.479	100.019
CADAFLAG00001258	AFLA_084790	1	1	18	44	764	717	0	0	56	140	86	64		28.9957	37.124	19.2574	23.0199	27.4702	30.0805	0	0	22.1034	23.3748	21.3307	18.8729
CADAFLAG00001259	AFLA_084800	0	0	1	2	78	72	0	0	8	16	15	10		0	0	7.99997	7.82428	20.9713	22.5871	0	0	23.6115	19.9758	27.8202	22.0507
CADAFLAG00001260	AFLA_084810	0	0	6	13	712	695	0	0	45	51	57	39		0	0	14.7522	15.6306	58.8342	67.0087	0	0	40.8192	19.5691	32.4909	26.4305
CADAFLAG00001261	AFLA_084820	5	3	247	465	6153	5038	0	1	548	1603	919	741		165.832	127.391	302.264	278.271	253.057	241.761	0	426.828	247.409	306.138	260.727	249.943
CADAFLAG00001262	AFLA_084830	0	0	0	0	19	21	0	0	3	1	2	1		0	0	0	0	2.71637	3.50309	0	0	4.70825	0.663877	1.97244	1.17254
CADAFLAG00001263	AFLA_084840	5	3	95	86	2872	2423	0	0	291	493	509	431		144.402	110.929	101.232	44.8146	102.854	101.248	0	0	114.402	81.9855	125.746	126.592
CADAFLAG00001264	AFLA_084850	2	6	87	205	2583	2079	0	0	227	547	313	190		26.104	100.265	41.8974	48.2779	41.8057	39.2611	0	0	40.331	41.1102	34.9457	25.2206
CADAFLAG00001265	AFLA_084860	16	8	553	719	32343	26590	0	5	2385	4005	4643	4220		3228.19	2066.57	4116.76	2617.49	8091.96	7762.27	0	12982.7	6550.35	4652.95	8013.28	8659.18
CADAFLAG00001266	AFLA_084870	0	0	0	0	9	4	0	0	0	0	0	0		0	0	0	0	2.5332	1.31366	0	0	0	0	0	0
CADAFLAG00001267	AFLA_084880	1	2	18	57	589	483	0	0	52	119	52	58		33.5493	85.9082	22.2817	34.5045	24.5038	23.4457	0	0	23.7478	22.9888	14.9231	19.7896
CADAFLAG00001268	AFLA_084890	0	0	0	1	22	17	0	0	3	1	1	0		0	0	0	0.560071	0.846804	0.763495	0	0	1.26761	0.178736	0.265521	0
CADAFLAG00001269	AFLA_084900	1	0	17	47	960	763	0	0	66	127	71	57		19.3176	0	12.117	16.3821	22.9964	21.326	0	0	17.3554	14.1268	11.7323	11.1983
CADAFLAG00001270	AFLA_084910	0	0	2	12	149	117	0	0	10	20	15	9		0	0	2.46436	7.23072	6.17026	5.65327	0	0	4.5459	3.84591	4.28495	3.05668
CADAFLAG00001271	AFLA_084920	1	0	5	13	200	205	0	0	20	44	25	19		56.4515	0	10.4145	13.2415	14.0004	16.7441	0	0	15.3689	14.3026	12.0722	10.9082
CADAFLAG00001272	AFLA_084930	1	4	22	51	439	386	0	0	56	96	43	44		15.4377	79.0611	12.5313	14.2059	8.4039	8.62186	0	0	11.7681	8.53374	5.67836	6.90812
CADAFLAG00001273	AFLA_084940	0	0	3	22	229	145	0	0	15	41	15	16		0	0	3.37106	12.0891	8.64815	6.38929	0	0	6.21844	7.18991	3.90766	4.95563
CADAFLAG00001274	AFLA_084950	1	3	51	42	2918	2585	1	0	1335	820	1506	1493		105.267	404.329	198.086	79.7737	380.901	393.717	2467.27	0	1912.98	497.042	1356.09	1598.37
CADAFLAG00001275	AFLA_084960	0	0	8	21	334	358	0	0	51	71	47	48		0	0	72.6777	93.2946	101.977	127.536	0	0	170.933	100.662	98.9897	120.195
CADAFLAG00001276	AFLA_084970	2	1	56	109	2457	1946	0	0	222	378	301	195		43.8216	28.053	45.2728	43.0926	66.7571	61.6925	0	0	66.2138	47.691	56.4153	43.4528
CADAFLAG00001277	AFLA_084980	0	0	5	15	271	171	0	0	16	32	29	28		0	0	38.8404	56.9812	70.75	52.0895	0	0	45.8543	38.7935	52.2267	59.9523
CADAFLAG00001278	AFLA_084990	0	0	0	0	5	4	0	0	1	1	1	0		0	0	0	0	0.698211	0.651738	0	0	1.53292	0.648438	0.963284	0
CADAFLAG00001279	AFLA_085000	0	0	11	32	308	272	0	0	24	74	33	19		0	0	12.8733	18.3136	12.1141	12.4826	0	0	10.3623	13.5153	8.95349	6.12894
CADAFLAG00001280	AFLA_085010	0	0	5	12	50	51	0	0	5	28	5	8		0	0	11.0743	12.9974	3.72187	4.42953	0	0	4.08567	9.67833	2.56743	4.88395
CADAFLAG00001281	AFLA_085020	2	1	63	58	1362	1257	0	1	99	160	139	146		83.4877	53.4457	97.0341	43.6856	70.5024	75.9205	0	537.215	56.2555	38.4591	49.634	61.9827
CADAFLAG00001282	AFLA_085030	2	1	30	50	877	728	0	0	67	189	114	62		139.013	88.991	76.9375	62.7066	75.5892	73.213	0	0	63.3924	75.6438	67.7802	43.8271
CADAFLAG00001283	AFLA_085040	0	2	32	81	488	396	0	0	50	151	96	101		0	320.674	147.861	183.027	75.7823	71.753	0	0	85.2356	108.887	102.839	128.635
CADAFLAG00001284	AFLA_085050	1	1	32	78	1953	1511	0	1	150	269	187	125		16.123	20.6427	19.0366	22.6913	39.0466	35.2487	0	207.493	32.9212	24.9738	25.7906	20.4966
CADAFLAG00001285	AFLA_085060	2	0	5	17	183	143	0	0	17	39	16	13		145.269	0	13.3999	22.2796	16.4827	15.0283	0	0	16.8085	16.3114	9.94109	9.60307
CADAFLAG00001286	AFLA_085070	2	0	23	34	493	464	0	0	24	67	60	54		73.7404	0	31.2892	22.6189	22.5402	24.7528	0	0	12.0455	14.2245	18.9234	20.2486
CADAFLAG00001287	AFLA_085080	1	0	35	89	693	604	1	0	68	200	128	66		51.3317	0	66.2895	82.4314	44.1116	44.8594	1203.12	0	47.5151	59.1155	56.204	34.4552
CADAFLAG00001288	AFLA_085090	6	1	87	190	1801	1589	0	1	191	585	267	223		117.574	25.0887	62.9026	67.1784	43.7629	45.0519	0	252.182	50.9482	66.0086	44.755	44.4415
CADAFLAG00001289	AFLA_085100	0	0	0	2	29	32	0	0	8	3	5	5		0	0	0	2.24029	2.23248	2.87433	0	0	6.76056	1.07242	2.65521	3.15683
CADAFLAG00001290	AFLA_085110	1	4	12	50	586	496	0	0	54	124	73	67		27.2549	139.581	12.0675	24.5885	19.8051	19.5595	0	0	20.0344	19.4604	17.0192	18.5714
CADAFLAG00001291	AFLA_085120	0	0	10	16	261	267	0	0	25	55	17	19		0	0	10.8064	8.45527	9.47905	11.3144	0	0	9.96706	9.27553	4.25904	5.65938
CADAFLAG00001292	AFLA_085130	6	2	101	233	3106	2711	0	0	214	681	337	220		85.536	36.5046	53.1264	59.9337	54.9077	55.9189	0	0	41.5287	55.9025	41.096	31.8967
CADAFLAG00001293	AFLA_085140	1	0	27	77	1524	1241	0	0	316	123	86	58		83.9703	0	83.6528	116.663	158.688	150.775	0	0	361.202	59.4726	61.7727	49.5312
CADAFLAG00001294	AFLA_085150	0	0	3	4	175	143	0	0	14	17	11	7		0	0	7.65711	4.99264	15.0115	14.3126	0	0	13.1831	6.77154	6.50905	4.92465
CADAFLAG00001295	AFLA_085160	0	0	2	20	634	482	0	0	36	37	32	20		0	0	0.976317	4.77438	10.4014	9.22673	0	0	6.48349	2.81875	3.62153	2.69107
CADAFLAG00001296	AFLA_085170	1	1	67	125	3470	2973	0	0	192	480	333	267		22.841	29.2439	56.4652	51.516	98.283	98.2519	0	0	59.6971	63.1309	65.0626	62.0228
CADAFLAG00001297	AFLA_085180	0	0	1	3	10	13	0	0	4	2	0	0		0	0	8.37497	12.2866	2.81466	4.2694	0	0	12.3592	2.61401	0	0
CADAFLAG00001298	AFLA_085190	0	1	15	17	589	498	0	0	67	71	62	57		0	37.4982	16.2096	8.98373	21.3914	21.1033	0	0	26.7117	11.9739	15.533	16.9781
CADAFLAG00001299	AFLA_085200	2	2	30	84	1778	1442	0	0	102	224	162	125		64.7076	82.8468	35.8128	49.0368	71.3332	67.5028	0	0	44.9224	41.7311	44.8345	41.1302
CADAFLAG00001300	AFLA_085210	0	0	1	0	1	2	0	0	0	0	1	1		0	0	7.44442	0	0.250192	0.583849	0	0	0	0	1.72588	2.05194
CADAFLAG00001301	AFLA_085220	1	0	23	54	444	359	0	0	42	114	55	42		26.753	0	22.7034	26.0665	14.7295	13.8963	0	0	15.2953	17.5616	12.5866	11.4274
CADAFLAG00001302	AFLA_085230	0	0	0	1	34	27	0	0	0	3	6	2		0	0	0	2.59518	6.06406	5.61882	0	0	0	2.48461	7.382	2.92554
CADAFLAG00001303	AFLA_085240	0	0	4	2	94	65	0	0	9	11	5	3		0	0	7.94071	1.94158	6.27148	5.06003	0	0	6.59155	3.4079	2.30118	1.64155
CADAFLAG00001304	AFLA_085250	1	1	62	99	3417	2889	0	0	245	520	429	294		13.9413	17.8494	31.8924	24.9033	59.0722	58.2751	0	0	46.4951	41.744	51.1604	41.6847
CADAFLAG00001305	AFLA_085260	0	2	12	36	321	315	0	0	34	68	51	41		0	104.784	18.1182	26.5805	16.2886	18.6503	0	0	18.9391	16.0228	17.852	17.0629
CADAFLAG00001306	AFLA_085270	7	3	134	270	3371	3092	0	0	313	762	446	385		169.198	92.8408	119.507	117.755	101.039	108.135	0	0	102.986	106.057	92.2156	94.6418
CADAFLAG00001307	AFLA_085280	6	7	138	326	3106	2692	0	1	249	581	367	365		166.656	248.937	141.43	163.382	106.981	108.187	0	357.459	94.147	92.925	87.1984	103.107
CADAFLAG00001308	AFLA_085290	0	1	7	30	271	263	0	0	34	51	40	27		0	47.6493	9.61226	20.1454	12.5066	14.162	0	0	17.2247	10.9293	12.7341	10.2194
CADAFLAG00001309	AFLA_085300	1	1	16	38	272	257	0	0	29	64	41	29		72.9993	93.4629	43.0953	50.0518	24.6219	27.1446	0	0	28.8173	26.902	25.6021	21.5299
CADAFLAG00001310	AFLA_085310	2	0	10	23	364	258	0	0	39	56	42	18		13.0169	0	2.40142	2.70099	2.93774	2.42957	0	0	3.45525	2.09871	2.33829	1.19145
CADAFLAG00001311	AFLA_085320	1	0	41	64	2007	1744	0	0	135	308	181	136		34.5878	0	52.3236	39.9411	86.0804	87.2771	0	0	63.5614	61.3422	53.5517	47.8395
CADAFLAG00001312	AFLA_085330	0	0	2	3	142	113	0	0	11	12	12	2		0	0	5.95553	4.36856	14.2109	13.195	0	0	12.0845	5.57656	8.28424	1.64155
CADAFLAG00001313	AFLA_085340	0	0	0	0	4	9	0	0	1	0	1	1		0	0	0	0	0.818811	2.14963	0	0	2.24712	0	1.41209	1.67886
CADAFLAG00001314	AFLA_085350	1	2	69	118	2581	2351	0	0	258	591	488	370		41.7439	106.891	106.275	88.8775	133.603	141.996	0	0	146.605	142.058	174.255	157.079
CADAFLAG00001315	AFLA_085360	0	0	21	32	698	525	0	0	93	117	127	95		0	0	18.3621	13.6829	20.5117	18.0012	0	0	30.0007	15.9655	25.7447	22.896
CADAFLAG00001316	AFLA_085370	0	1	13	20	219	125	0	1	23	45	21	22		0	41.7021	15.6233	11.754	8.84536	5.89085	0	419.172	10.1977	8.43987	5.85098	7.2876
CADAFLAG00001317	AFLA_085380	1	4	37	55	1088	865	0	0	85	201	137	90		33.3951	171.026	45.5906	33.1408	45.0553	41.7955	0	0	38.6401	38.6514	39.1359	30.5668
CADAFLAG00001318	AFLA_085390	0	2	11	38	472	405	0	0	35	95	48	47		0	320.674	50.8274	85.8647	73.2977	73.3838	0	0	59.6649	68.5052	51.4194	59.86
CADAFLAG00001319	AFLA_085400	5	6	409	573	13584	11829	2	1	1304	3353	3074	2640		139.413	214.193	420.774	288.274	469.674	477.214	1307.04	358.831	494.936	538.336	733.179	748.623
CADAFLAG00001320	AFLA_085410	0	0	32	29	526	479	0	0	54	124	91	65		0	0	77.6106	34.395	42.8746	45.5561	0	0	48.3181	46.934	51.1674	43.4528
CADAFLAG00001321	AFLA_085420	12	9	413	833	13209	11353	0	1	825	2703	1496	1182		370.111	355.397	469.994	463.568	505.191	506.632	0	396.923	346.371	480.046	394.689	370.761
CADAFLAG00001322	AFLA_085430	0	0	36	64	1027	867	0	0	101	220	139	123		0	0	35.0835	30.5005	33.6367	33.1329	0	0	36.3134	33.4594	31.4048	33.0399
CADAFLAG00001323	AFLA_085440	2	0	14	23	587	543	0	0	27	62	50	39		67.8825	0	17.5326	14.0855	24.7059	26.6661	0	0	12.4747	12.1173	14.5168	13.4623
CADAFLAG00001324	AFLA_085450	3	2	101	225	2725	2485	0	1	195	662	348	241		172.939	147.612	214.825	234.03	194.792	207.266	0	741.868	153.018	219.743	171.602	141.291
CADAFLAG00001325	AFLA_085460	0	0	13	27	886	767	0	0	66	172	174	131		0	0	8.76475	8.90197	20.0758	20.2783	0	0	16.4167	18.0975	27.1973	24.3445
CADAFLAG00001326	AFLA_085470	0	0	6	4	613	520	0	0	184	59	222	185		0	0	54.5083	17.7704	187.161	185.248	0	0	616.701	83.6485	467.568	463.251
CADAFLAG00001327	AFLA_085480	5	4	71	173	630	527	0	0	144	291	155	144		199.545	204.386	104.549	124.576	31.1778	30.4307	0	0	78.2294	66.8728	52.9145	58.4464
CADAFLAG00001328	AFLA_085490	1	0	4	6	116	103	0	0	8	23	18	8		13.1465	0	1.94026	1.42324	1.89105	1.9592	0	0	1.43165	1.7411	2.0242	1.06961
CADAFLAG00001329	AFLA_085500	31	31	25	23	308	271	3	0	30	136	34	31		1563.66	2001.99	46.5276	20.9327	19.2648	19.7779	3546.7	0	20.5986	39.5007	14.67	15.9025
CADAFLAG00001330	AFLA_085510	1	0	57	140	885	728	1	0	87	238	193	128		22.6275	0	47.5886	57.1587	24.8322	23.8341	530.348	0	26.7974	31.0099	37.3565	29.4559
CADAFLAG00001331	AFLA_085520	0	0	12	28	345	320	0	0	35	55	25	30		0	0	21.2979	24.3019	20.5787	22.2713	0	0	22.9176	15.234	10.2867	14.6761
CADAFLAG00001332	AFLA_085530	0	3	34	109	873	677	0	0	61	169	67	49		0	116.731	38.1254	59.7706	32.8997	29.769	0	0	25.2354	29.5745	17.4177	15.1449
CADAFLAG00001333	AFLA_085540	0	1	1	3	15	13	0	0	2	4	1	2		0	141.978	4.09159	6.0026	2.06265	2.08581	0	0	3.01903	2.55415	0.948577	2.25557
CADAFLAG00001334	AFLA_085550	0	0	0	0	29	34	0	0	5	7	4	5		0	0	0	0	6.07443	8.30967	0	0	11.4969	6.8086	5.7797	8.58951
CADAFLAG00001335	AFLA_085560	0	0	0	0	1	0	0	0	0	0	0	0		0	0	0	0	0.176606	0	0	0	0	0	0	0
CADAFLAG00001336	AFLA_085570	0	0	4	3	46	32	0	0	8	3	7	0		0	0	6.12569	2.24669	2.36753	1.9217	0	0	4.51992	0.716987	2.48527	0
CADAFLAG00001337	AFLA_085580	0	0	32	62	995	889	0	0	75	237	125	127		0	0	59.4865	56.362	62.1633	64.8052	0	0	51.4369	68.7561	53.8715	65.0737
CADAFLAG00001338	AFLA_085590	0	0	13	11	253	227	0	0	17	25	25	25		0	0	20.6153	8.53032	13.4837	14.116	0	0	9.94583	6.18702	9.1911	10.9275
CADAFLAG00001339	AFLA_085600	1	3	85	203	1821	1580	0	0	144	507	231	227		54.4077	208.979	170.636	199.285	122.858	124.38	0	0	106.65	158.838	107.509	125.606
CADAFLAG00001340	AFLA_085610	0	0	11	8	46	49	0	0	4	7	8	8		0	0	17.6526	6.27817	2.48095	3.08356	0	0	2.36822	1.75311	2.97637	3.53867
CADAFLAG00001341	AFLA_085620	0	0	0	0	0	1	0	0	1	0	0	0		0	0	0	0	0	0.105621	0	0	0.993701	0	0	0
CADAFLAG00001342	AFLA_085630	0	0	0	0	1	2	0	0	0	0	0	0		0	0	0	0	0.18571	0.433372	0	0	0	0	0	0
CADAFLAG00001343	AFLA_085640	0	0	2	6	14	11	0	0	1	8	2	2		0	0	4.75738	6.97935	1.1192	1.02605	0	0	0.877573	2.96977	1.10293	1.3113
CADAFLAG00001344	AFLA_085650	0	1	5	8	219	160	0	0	14	29	16	8		0	36.2556	5.22415	4.08754	7.69012	6.5555	0	0	5.39659	4.72867	3.87567	2.30393
CADAFLAG00001345	AFLA_085660	0	0	0	0	2	3	0	0	0	1	1	1		0	0	0	0	0.107867	0.18879	0	0	0	0.250444	0.372047	0.442334
CADAFLAG00001346	AFLA_085670	0	0	0	1	3	3	0	0	1	1	0	0		0	0	0	0.505036	0.104126	0.121495	0	0	0.381014	0.161172	0	0
CADAFLAG00001347	AFLA_085680	0	0	0	0	2	2	0	0	0	0	0	0		0	0	0	0	0.281466	0.328415	0	0	0	0	0	0
CADAFLAG00001348	AFLA_085690	0	0	0	0	2	0	0	0	0	0	0	1		0	0	0	0	0.0700927	0	0	0	0	0	0	0.287431
CADAFLAG00001349	AFLA_085700	1	1	63	82	1242	1103	1	0	171	266	191	210		94.3303	120.773	219.272	139.567	145.28	150.542	2210.93	0	219.576	144.484	154.119	201.463
CADAFLAG00001350	AFLA_085710	0	0	3	1	23	15	0	0	2	2	4	0		0	0	4.15502	0.677296	1.07059	0.814673	0	0	1.02195	0.432292	1.28438	0
CADAFLAG00001351	AFLA_085720	0	0	3	3	29	15	0	0	2	7	3	2		0	0	6.02245	2.94509	1.95656	1.18082	0	0	1.48125	2.19303	1.39622	1.10666
CADAFLAG00001352	AFLA_085730	0	0	0	0	0	0	0	0	0	0	0	0		0	0	0	0	0	0	0	0	0	0	0	0
CADAFLAG00001353	AFLA_085740	1	0	12	34	354	320	0	0	27	85	46	35		29.7073	0	13.1533	18.2247	13.0407	13.7545	0	0	10.9185	14.5401	11.6894	10.5744
CADAFLAG00001354	AFLA_085750	0	0	3	3	131	88	0	0	8	23	13	4		0	0	7.0526	3.44886	10.3501	8.11243	0	0	6.93847	8.43822	7.08521	2.59192
CADAFLAG00001355	AFLA_085760	0	0	17	14	168	139	0	0	23	22	22	15		0	0	67.9997	27.385	22.5845	21.8028	0	0	33.9416	13.7333	20.4015	16.538
CADAFLAG00001356	AFLA_085770	0	0	5	16	165	109	0	0	15	44	31	23		0	0	5.06614	7.92782	5.61868	4.33086	0	0	5.60718	6.95753	7.28199	6.42346
CADAFLAG00001357	AFLA_085780	0	0	6	9	378	336	0	0	28	31	50	48		0	0	8.01992	5.88285	16.9806	17.6116	0	0	13.8077	6.46659	15.4942	17.6845
CADAFLAG00001358	AFLA_085790	1	1	35	62	1116	944	0	0	99	157	102	117		23.6081	30.2261	30.4874	26.4101	32.6708	32.2452	0	0	31.8151	21.3426	20.5984	28.0913
CADAFLAG00001359	AFLA_085800	0	1	3	9	150	139	0	0	17	23	22	19		0	65.0319	5.62236	8.24833	9.44782	10.2153	0	0	11.7542	6.72697	9.55874	9.81487
CADAFLAG00001360	AFLA_085810	2	1	84	266	1611	1416	0	0	129	325	121	96		37.4887	23.9989	58.0953	89.9641	37.4455	38.403	0	0	32.9152	35.0784	19.4012	18.3006
CADAFLAG00001361	AFLA_085820	0	0	2	4	11	18	0	0	0	0	5	6		0	0	3.70933	3.62787	0.685648	1.30911	0	0	0	0	2.14989	3.06726
CADAFLAG00001362	AFLA_085830	0	0	49	74	1569	1319	0	0	105	255	151	120		0	0	26.3694	19.4743	28.3772	27.8348	0	0	20.8468	21.416	18.8392	17.8
CADAFLAG00001363	AFLA_085840	2	4	59	122	3042	2632	0	0	347	513	480	421		71.9151	184.15	78.2769	79.1531	135.639	136.933	0	0	169.847	106.217	147.64	153.956
CADAFLAG00001364	AFLA_085850	0	1	7	12	128	100	0	1	31	17	15	17		0	39.2386	7.91558	6.63578	4.8645	4.4343	0	394.411	12.9328	3.00005	3.93239	5.29868
CADAFLAG00001365	AFLA_085860	0	0	0	1	9	3	0	0	1	3	0	1		0	0	0	1.94158	1.20092	0.467079	0	0	1.46479	1.85885	0	1.09437
CADAFLAG00001366	AFLA_085870	2	0	16	35	59	60	0	0	12	21	21	15		60.5286	0	17.8666	19.1124	2.2142	2.62732	0	0	4.94366	3.65962	5.43653	4.61686
CADAFLAG00001367	AFLA_085880	0	1	9	7	1184	978	0	0	320	165	318	292		0	31.8478	8.26024	3.14177	36.5212	35.1989	0	0	108.354	23.6336	67.6641	73.8698
CADAFLAG00001368	AFLA_085890	0	0	1	1	53	24	0	0	8	8	4	5		0	0	2.54027	1.24224	4.5248	2.39074	0	0	7.4975	3.17151	2.35571	3.50094
CADAFLAG00001369	AFLA_085900	0	0	0	4	40	25	0	0	3	5	3	4		0	0	0	11.3551	7.80383	5.69095	0	0	6.42498	4.5297	4.03745	6.40027
CADAFLAG00001370	AFLA_085910	8	16	154	384	4354	3631	1	0	306	1051	527	420		95.8078	245.33	68.0492	82.9774	64.6597	62.9171	280.695	0	49.8849	72.4769	53.9876	51.1547
CADAFLAG00001371	AFLA_085920	0	1	10	27	216	178	0	0	25	56	30	30		0	86.9118	25.0466	33.0704	18.1822	17.4827	0	0	23.1012	21.8893	17.4201	20.7112
CADAFLAG00001372	AFLA_085930	1	0	18	48	475	441	0	0	43	105	53	45		32.6446	0	21.6808	28.2729	19.2282	20.8296	0	0	19.1081	19.7373	14.7999	14.94
CADAFLAG00001373	AFLA_085940	4	1	85	150	2553	2132	0	1	187	583	309	193		84.2544	26.9683	66.0606	57.0087	66.6834	64.9757	0	271.074	53.6181	70.711	55.6754	41.3442
CADAFLAG00001374	AFLA_085950	0	0	1	3	7	6	0	0	0	3	6	5		0	0	1.48066	2.17221	0.348334	0.348374	0	0	0	0.693219	2.05962	2.0406
CADAFLAG00001375	AFLA_085960	0	0	1	22	782	587	0	0	96	115	99	67		0	0	0.840122	9.03839	22.0797	19.3384	0	0	29.755	15.0777	19.2823	15.515
CADAFLAG00001376	AFLA_085970	1	2	30	54	550	492	0	0	54	116	82	52		27.6702	70.8538	30.6285	26.9602	18.8716	19.6974	0	0	20.3396	18.4823	19.4088	14.6333
CADAFLAG00001377	AFLA_085980	9	1	115	206	1854	1660	0	0	243	512	331	295		420.391	59.8042	198.199	173.619	107.388	112.189	0	0	154.509	137.711	132.255	140.139
CADAFLAG00001378	AFLA_085990	1	0	12	14	170	165	0	0	12	17	13	16		81.1556	0	35.9328	20.5005	17.1081	19.3747	0	0	13.2567	7.94427	9.02473	13.2058
CADAFLAG00001379	AFLA_086000	1	1	17	40	337	268	0	0	26	72	39	25		19.4469	24.8984	12.1981	14.0355	8.12672	7.5408	0	0	6.88274	8.0625	6.48766	4.94443
CADAFLAG00001380	AFLA_086010	2	2	36	76	541	421	1	1	75	238	132	86		108.006	138.283	71.7321	74.0544	36.2286	32.8952	1265.74	694.985	55.1338	74.0087	60.9769	47.2327
CADAFLAG00001381	AFLA_086020	0	0	0	0	27	25	0	0	5	0	4	4		0	0	0	0	0.870078	0.940007	0	0	1.76875	0	0.889185	1.05717
CADAFLAG00001382	AFLA_086030	0	0	1	0	2	0	0	0	0	0	1	0		0	0	2.45871	0	0.165265	0	0	0	0	0	0.570017	0
CADAFLAG00001383	AFLA_086040	0	0	0	0	1	1	0	0	0	0	0	0		0	0	0	0	0.207056	0.241593	0	0	0	0	0	0
CADAFLAG00001384	AFLA_086050	0	0	0	0	2	3	0	0	1	0	0	0		0	0	0	0	0.189619	0.331872	0	0	1.04077	0	0	0
CADAFLAG00001385	AFLA_086060	0	0	0	2	0	1	0	0	0	0	0	0		0	0	0	4.94554	0	0.198288	0	0	0	0	0	0
CADAFLAG00001386	AFLA_086070	0	0	0	1	8	3	0	0	0	1	0	2		0	0	0	0.292537	0.160838	0.0703747	0	0	0	0.0933577	0	0.329776
CADAFLAG00001387	AFLA_086080	0	0	1	2	64	53	0	0	2	26	12	5		0	0	0.815826	0.79791	1.75477	1.69556	0	0	0.601968	3.31029	2.26966	1.12435
CADAFLAG00001388	AFLA_086090	0	0	0	0	0	0	0	0	0	0	0	0		0	0	0	0	0	0	0	0	0	0	0	0
CADAFLAG00001389	AFLA_086100	0	0	0	1	40	30	0	0	1	9	2	0		0	0	0	1.48087	4.07092	3.56247	0	0	1.11721	4.25331	1.40411	0
CADAFLAG00001390	AFLA_086110	0	0	1	1	40	31	0	2	4	7	4	4		0	0	2.65345	1.29759	3.5671	3.22562	0	1851	3.91577	2.89871	2.46067	2.92554
CADAFLAG00001391	AFLA_086120	1	1	87	436	428	349	0	0	93	35	122	113		274.092	350.927	879.846	2156.25	145.47	138.405	0	0	346.989	55.2395	286.041	314.992
CADAFLAG00001392	AFLA_086130	0	0	0	1	1	4	0	0	1	0	0	0		0	0	0	1.47255	0.101201	0.472327	0	0	1.11094	0	0	0
CADAFLAG00001393	AFLA_086140	0	0	0	0	0	0	0	0	0	0	0	0		0	0	0	0	0	0	0	0	0	0	0	0
CADAFLAG00001394	AFLA_086150	0	0	4	2	337	279	0	0	20	19	24	20		0	0	12.9939	3.17713	36.7919	35.5405	0	0	23.9693	9.63225	18.0747	17.9078
CADAFLAG00001395	AFLA_086160	0	0	8	12	463	408	0	0	25	37	60	38		0	0	7.1946	5.27745	13.994	14.3885	0	0	8.29473	5.19294	12.5098	9.41964
CADAFLAG00001396	AFLA_086170	1	4	101	183	2716	2305	0	0	223	562	370	327		51.697	264.756	192.654	170.7	174.112	172.412	0	0	156.93	167.297	163.621	171.925
CADAFLAG00001397	AFLA_086180	1	5	58	115	1480	1392	0	1	150	444	262	217		34.5056	220.892	73.8429	71.5987	63.3265	69.4961	0	444.064	70.456	88.2183	77.3327	76.1508
CADAFLAG00001398	AFLA_086190	0	0	10	16	358	287	0	0	41	58	66	59		0	0	17.7483	13.8868	21.3541	19.9746	0	0	26.8464	16.0649	27.157	28.863
CADAFLAG00001399	AFLA_086200	0	0	8	13	163	125	0	0	16	25	29	27		0	0	35.7332	28.3956	24.4688	21.8943	0	0	26.3662	17.4268	30.0304	33.2414
CADAFLAG00001400	AFLA_086210	1	1	80	81	2506	2290	0	0	226	333	352	326		34.7533	44.4955	102.583	50.7923	107.997	115.15	0	0	106.916	66.6386	104.643	115.223
CADAFLAG00001401	AFLA_086220	0	0	10	24	738	668	0	0	56	102	119	89		0	0	17.3462	20.3583	43.0233	45.4382	0	0	35.8375	27.6121	47.8556	42.5528
CADAFLAG00001402	AFLA_086230	0	0	8	21	274	250	0	0	22	56	37	25		0	0	14.6849	18.8506	16.9034	17.9953	0	0	14.8987	16.0422	15.7457	12.6489
CADAFLAG00001403	AFLA_086240	0	0	1	1	29	25	0	0	1	5	3	3		0	0	2.19671	1.07424	2.14099	2.15354	0	0	0.810436	1.71411	1.52783	1.81647
CADAFLAG00001404	AFLA_086250	0	1	36	73	1306	1100	0	0	117	258	222	152		0	13.052	13.541	13.4276	16.5095	16.2249	0	0	16.236	15.1448	19.359	15.7589
CADAFLAG00001405	AFLA_086260	1	3	49	107	2237	1857	0	1	227	404	345	279		18.9894	72.9377	34.3319	36.6616	52.6757	51.0215	0	244.38	58.6777	44.1751	56.0405	53.8815
CADAFLAG00001406	AFLA_086270	3	2	32	46	952	799	0	0	78	173	106	74		33.7311	28.7912	13.2755	9.33221	13.2734	12.9983	0	0	11.9383	11.2006	10.195	8.46187
CADAFLAG00001407	AFLA_086280	4	8	127	276	1940	1696	0	0	186	631	329	283		484.229	1239.94	567.264	602.861	291.224	297.062	0	0	306.507	439.851	340.689	348.419
CADAFLAG00001408	AFLA_086290	1	0	18	31	453	377	0	0	39	77	47	43		36.4996	0	24.2411	20.4159	20.5032	19.9095	0	0	19.3772	16.1832	14.6743	15.9618
CADAFLAG00001409	AFLA_086300	2	1	46	91	1559	1314	0	0	196	345	312	226		38.6353	24.7329	32.7871	31.7185	37.3452	36.7266	0	0	51.5403	38.376	51.5562	44.4005
CADAFLAG00001410	AFLA_086310	0	0	29	54	1217	1141	0	0	92	206	118	109		0	0	44.5385	40.5562	62.8161	68.7169	0	0	52.128	49.3742	42.0146	46.1422
CADAFLAG00001411	AFLA_086320	2	0	15	29	667	541	0	0	34	103	97	42		62.8868	0	17.4025	16.453	26.007	24.6126	0	0	14.5528	18.6489	26.09	13.4309
CADAFLAG00001412	AFLA_086330	0	0	6	12	207	150	0	0	15	40	28	14		0	0	5.22925	5.11441	6.06319	5.12648	0	0	4.82308	5.44055	5.65753	3.36318
CADAFLAG00001413	AFLA_086340	1	1	5	23	353	304	0	0	32	73	71	61		68.2012	87.3198	12.5821	28.3033	29.8539	29.9983	0	0	29.7084	28.6683	41.4212	42.3104
CADAFLAG00001414	AFLA_086350	4	0	13	32	55	45	0	0	34	222	204	190		206.788	0	24.7971	29.8492	3.52584	3.36596	0	0	23.9266	66.0853	90.2127	99.8951
CADAFLAG00001415	AFLA_086360	0	0	24	87	128	129	0	0	39	83	132	99		0	0	29.3697	52.0636	5.26432	6.1904	0	0	17.6076	15.8512	37.4493	33.3932
CADAFLAG00001416	AFLA_086370	0	0	0	3	6	4	0	0	0	4	4	7		0	0	0	2.27266	0.312379	0.242989	0	0	0	0.967034	1.43657	2.98895
CADAFLAG00001417	AFLA_086380	0	0	2	1	21	24	0	0	1	3	4	4		0	0	10.5098	2.56974	3.70873	4.94554	0	0	1.93869	2.46025	4.87308	5.79371
CADAFLAG00001418	AFLA_086390	0	1	3	2	110	98	0	0	8	10	11	9		0	83.0318	7.17854	2.3403	8.84608	9.19562	0	0	7.06237	3.73431	6.10223	5.93597
CADAFLAG00001419	AFLA_086400	23	21	357	783	5963	4995	0	2	693	2476	1503	1209		592.407	692.52	339.275	363.892	190.455	186.148	0	662.946	242.976	367.223	331.149	316.697
CADAFLAG00001420	AFLA_086410	7	8	166	314	5573	4434	1	0	336	1117	701	549		97.4957	142.659	85.3074	78.9105	96.2522	89.3541	326.446	0	63.7036	89.5832	83.5175	77.7651
CADAFLAG00001421	AFLA_086420	13	5	145	322	3560	3104	0	0	291	915	466	424		562.051	276.773	231.309	251.192	190.861	194.172	0	0	171.263	227.793	172.342	186.433
CADAFLAG00001422	AFLA_086430	5	5	85	147	2725	2446	0	0	229	606	416	299		465.604	596.125	292.05	246.992	314.665	329.56	0	0	290.282	324.942	331.37	283.168
CADAFLAG00001423	AFLA_086440	2	2	49	121	2273	2116	0	0	172	393	225	175		116.215	148.793	105.056	126.863	163.782	177.901	0	0	136.05	131.495	111.837	103.418
CADAFLAG00001424	AFLA_086450	0	0	0	0	0	0	0	0	0	0	0	0		0	0	0	0	0	0	0	0	0	0	0	0
CADAFLAG00001425	AFLA_086460	0	0	0	0	0	0	0	0	0	0	0	0		0	0	0	0	0	0	0	0	0	0	0	0
CADAFLAG00001426	AFLA_086470	0	0	0	0	0	0	0	0	0	0	0	0		0	0	0	0	0	0	0	0	0	0	0	0
CADAFLAG00001427	AFLA_086480	9	8	170	387	5490	4600	0	0	453	1089	690	628		278.371	316.805	194.009	215.978	210.566	205.86	0	0	190.729	193.953	182.559	197.545
CADAFLAG00001428	AFLA_086490	0	3	49	79	922	801	0	0	77	274	156	124		0	453.637	213.528	168.349	135.031	136.877	0	0	123.793	186.339	157.603	148.941
CADAFLAG00001429	AFLA_086500	0	0	0	2	53	24	0	0	7	5	7	4		0	0	0	3.08369	5.61608	2.96733	0	0	8.1425	2.46025	5.11674	3.47623
CADAFLAG00001430	AFLA_086510	0	0	1	1	15	14	0	0	0	0	2	1		0	0	0.541412	0.264761	0.272937	0.297232	0	0	0	0	0.251038	0.149232
CADAFLAG00001431	AFLA_086520	0	0	0	0	7	3	0	0	0	0	1	0		0	0	0	0	0.285934	0.142983	0	0	0	0	0.281777	0
CADAFLAG00001432	AFLA_086530	0	0	7	9	251	206	0	0	25	27	23	20		0	0	4.35265	2.73668	5.24533	5.023	0	0	5.73511	2.62008	3.31562	3.42783
CADAFLAG00001433	AFLA_086540	14	6	649	1206	22055	19281	1	3	1786	3416	2482	2281		831.237	456.109	1421.78	1292	1623.82	1656.37	1391.62	2292.31	1443.5	1167.89	1260.58	1377.36
CADAFLAG00001434	AFLA_086550	0	0	15	22	579	532	0	0	47	77	68	53		0	0	43.2256	31.0027	56.0753	60.1176	0	0	49.9682	34.6287	45.4297	42.0978
CADAFLAG00001435	AFLA_086560	0	0	3	2	116	108	0	0	9	16	18	15		0	0	4.82881	1.57425	6.27509	6.81683	0	0	5.3445	4.01915	6.71695	6.65494
CADAFLAG00001436	AFLA_086570	1	0	36	60	1298	1126	0	0	96	221	169	148		34.6703	0	46.0523	37.5341	55.8042	56.4843	0	0	45.3071	44.1201	50.1207	52.1849
CADAFLAG00001437	AFLA_086580	0	0	13	24	557	451	0	0	51	51	56	54		0	0	8.21695	7.4183	11.8322	11.1785	0	0	11.8928	5.03074	8.20609	9.40795
CADAFLAG00001438	AFLA_086590	3	1	41	75	1472	1269	0	0	117	313	198	135		69.1755	29.5224	34.8824	31.204	42.0895	42.3374	0	0	36.7243	41.5587	39.0543	31.6585
CADAFLAG00001439	AFLA_086600	2	5	43	91	1195	845	0	1	96	227	143	127		28.7376	91.9838	22.7971	23.5928	21.2923	17.5674	0	184.917	18.7771	18.7816	17.5764	18.5588
CADAFLAG00001440	AFLA_086610	0	0	6	13	182	145	0	0	24	44	24	20		0	0	24.5495	26.0113	25.0269	23.2648	0	0	36.2284	28.0957	22.7659	22.5557
CADAFLAG00001441	AFLA_086620	8	7	209	517	7100	5953	0	2	586	1373	1063	949		231.504	259.35	223.154	269.946	254.777	249.25	0	744.824	230.836	228.784	263.132	279.293
CADAFLAG00001442	AFLA_086630	70	39	744	1856	16311	14197	4	0	1331	4682	2534	2365		9244.37	6594.23	3625.29	4422.57	2671.12	2712.73	12381.2	0	2392.73	3560.38	2862.58	3176.4
CADAFLAG00001443	AFLA_086640	1	2	70	82	2394	1929	0	0	225	367	326	255		39.7996	101.913	102.794	58.8858	118.151	111.082	0	0	121.899	84.1068	110.986	103.215
CADAFLAG00001444	AFLA_086650	0	1	91	97	2276	1875	0	3	375	306	370	332		0	140.902	369.514	192.614	310.602	298.559	0	4248.88	561.78	193.912	348.315	371.587
CADAFLAG00001445	AFLA_086660	0	0	20	16	1391	1150	0	0	140	95	206	181		0	0	23.4915	9.19024	54.91	52.9686	0	0	60.6673	17.414	56.0956	58.5994
CADAFLAG00001446	AFLA_086670	0	0	50	80	1640	1504	0	0	138	290	217	225		0	0	149.72	117.146	165.043	176.603	0	0	152.453	135.52	150.644	185.706
CADAFLAG00001447	AFLA_086680	0	0	11	12	175	176	0	0	24	52	35	19		0	0	54.5924	29.1237	29.1891	34.2525	0	0	43.9437	40.2752	40.2706	25.9912
CADAFLAG00001448	AFLA_086690	0	0	14	24	689	455	0	0	52	85	51	41		0	0	6.65836	5.58183	11.0129	8.48576	0	0	9.12406	6.30889	5.62329	5.37473
CADAFLAG00001449	AFLA_086700	0	0	7	14	369	345	0	0	21	64	38	29		0	0	20.6153	20.1626	36.5226	39.8429	0	0	22.8169	29.4148	25.9452	23.5409
CADAFLAG00001450	AFLA_086710	18	25	440	1032	13305	11973	0	1	954	4022	1840	1549		655.347	1165.36	591.075	677.948	600.687	630.715	0	468.548	472.807	843.193	573.045	573.555
CADAFLAG00001451	AFLA_086720	1	1	25	52	247	206	0	0	23	70	28	30		99.499	127.391	91.7805	93.3555	30.4755	29.6563	0	0	31.1518	40.1054	23.8314	30.3575
CADAFLAG00001452	AFLA_086730	0	1	11	22	232	200	0	0	29	75	44	35		0	57.9412	18.3675	17.9642	13.0193	13.0957	0	0	17.8649	19.544	17.033	16.1087
CADAFLAG00001453	AFLA_086740	2	3	29	74	923	754	0	0	101	230	169	130		75.2038	144.428	40.2345	50.2064	43.0374	41.0216	0	0	51.6973	49.7993	54.3586	49.7139
CADAFLAG00001454	AFLA_086750	1	2	19	28	340	305	0	0	35	71	39	33		34.0207	87.1153	23.85	17.1878	14.3436	15.0133	0	0	16.2087	13.9088	11.3496	11.4178
CADAFLAG00001455	AFLA_086760	0	1	34	74	558	407	0	0	51	170	105	87		0	72.3701	70.9102	75.4724	39.1117	33.2862	0	0	39.2415	55.3317	50.7692	50.013
CADAFLAG00001456	AFLA_086770	3	0	36	68	1102	957	2	0	89	213	166	139		131.663	0	58.2958	53.8481	59.9735	60.7697	2057.3	0	53.1705	53.8282	62.3195	62.0417
CADAFLAG00001457	AFLA_086780	4	5	90	215	3126	2482	1	0	289	753	508	406		116.448	186.364	96.673	112.935	112.848	104.545	682.332	0	114.527	126.227	126.505	120.205
CADAFLAG00001458	AFLA_086790	1	1	27	56	735	709	0	0	93	190	102	75		24.1711	30.9469	24.0798	24.4232	22.0302	24.7956	0	0	30.5997	26.4446	21.0897	18.4367
CADAFLAG00001459	AFLA_086800	3	1	118	265	3691	3236	0	0	279	828	502	500		123.109	52.5399	178.666	196.215	187.822	192.136	0	0	155.851	195.652	176.216	208.672
CADAFLAG00001460	AFLA_086810	0	0	22	33	960	786	0	0	65	113	76	95		0	0	35.4113	25.9752	51.9318	49.6114	0	0	38.5992	28.3852	28.3605	42.1479
CADAFLAG00001461	AFLA_086820	5	4	63	173	1370	1131	0	0	129	474	178	151		248.748	254.782	115.643	155.293	84.517	81.411	0	0	87.3606	135.786	75.7497	76.3996
CADAFLAG00001462	AFLA_086830	4	1	20	33	402	337	0	0	41	129	48	47		214.419	68.6314	39.557	31.9179	26.7216	26.1375	0	0	29.9174	39.8179	22.0098	25.6227
CADAFLAG00001463	AFLA_086840	1	0	72	122	1798	1427	0	0	136	358	214	150		11.3491	0	30.1499	24.9827	25.3038	23.4324	0	0	21.0106	23.3954	20.7753	17.3132
CADAFLAG00001464	AFLA_086850	3	0	15	17	835	699	0	0	81	73	46	41		86.2982	0	15.9207	8.82362	29.7853	29.093	0	0	31.7178	12.0918	11.3191	11.9947
CADAFLAG00001465	AFLA_086860	0	0	21	35	1106	892	0	0	92	132	172	164		0	0	41.2306	33.6043	72.9791	68.676	0	0	66.6398	40.4454	78.2906	88.752
CADAFLAG00001466	AFLA_086870	1	4	58	139	1919	1521	0	0	171	310	201	200		26.7038	136.758	57.1468	66.9738	63.5451	58.767	0	0	62.1593	47.6673	45.9136	54.316
CADAFLAG00001467	AFLA_086880	1	2	48	94	1474	1297	0	0	137	213	139	107		24.131	61.7911	42.7374	40.928	44.107	45.2842	0	0	45.0021	29.5965	28.6921	26.2594
CADAFLAG00001468	AFLA_086890	0	0	9	7	146	119	0	0	18	37	28	11		0	0	13.4748	5.12512	7.34642	6.98662	0	0	9.94256	8.64523	9.71894	4.53948
CADAFLAG00001469	AFLA_086900	2	3	93	150	4192	3410	0	0	343	699	578	513		25.404	48.7881	43.586	34.378	66.028	62.6698	0	0	59.3067	51.1253	62.8018	66.2697
CADAFLAG00001470	AFLA_086910	1	0	7	22	300	245	0	0	32	69	35	29		63.7143	0	16.4561	25.2916	23.7024	22.5857	0	0	27.7539	25.3147	19.0756	18.7914
CADAFLAG00001471	AFLA_086920	1	0	73	139	2077	1677	0	0	237	304	268	260		73.7404	0	198.619	184.943	189.923	178.925	0	0	237.898	129.082	169.049	194.986
CADAFLAG00001472	AFLA_086930	1	0	19	44	543	419	0	0	60	92	78	76		29.7073	0	20.8261	23.5848	20.0031	18.0098	0	0	24.2634	15.7375	19.8212	22.9616
CADAFLAG00001473	AFLA_086940	60	36	677	1589	20109	16692	2	2	1407	4007	2265	1787		1317.3	1011.94	548.419	629.468	547.466	530.24	1029.17	565.091	420.498	506.568	425.376	399.009
CADAFLAG00001474	AFLA_086950	0	0	0	1	22	18	0	0	3	0	5	4		0	0	0	0.794283	1.20092	1.14647	0	0	1.7977	0	1.88278	1.79078
CADAFLAG00001475	AFLA_086960	2	4	81	176	1086	907	0	0	161	626	378	337		122.59	313.909	183.189	194.65	82.5444	80.4381	0	0	134.334	220.945	198.193	210.077
CADAFLAG00001476	AFLA_086970	0	0	2	13	127	101	0	0	21	31	27	30		0	0	10.8282	34.4189	23.1087	21.4432	0	0	41.9462	26.193	33.8901	44.7696
CADAFLAG00001477	AFLA_086980	1	1	24	64	745	660	0	0	59	176	79	74		29.6467	37.9574	26.253	34.2352	27.3884	28.3107	0	0	23.8103	30.0452	20.0343	22.3117
CADAFLAG00001478	AFLA_086990	62	35	919	3217	6165	5181	2	5	1154	5441	3012	1963		1103.76	797.756	603.654	1033.36	136.097	133.452	834.518	1145.53	279.656	557.759	458.679	355.408
CADAFLAG00001479	AFLA_087000	2	0	28	72	644	418	0	0	74	196	118	90		34.629	0	17.8879	22.4936	13.8271	10.4717	0	0	17.4413	19.5412	17.4769	15.8481
CADAFLAG00001480	AFLA_087010	0	0	1	0	6	10	0	0	1	0	0	0		0	0	4.50418	0	0.908261	1.76627	0	0	1.66174	0	0	0
CADAFLAG00001481	AFLA_087020	0	0	0	0	5	3	0	0	0	1	0	0		0	0	0	0	0.78321	0.54831	0	0	0	0.727378	0	0
CADAFLAG00001482	AFLA_087030	0	0	0	0	3	0	0	0	0	0	0	0		0	0	0	0	0.380574	0	0	0	0	0	0	0
CADAFLAG00001483	AFLA_087040	4	1	39	92	1379	1176	0	0	103	189	121	120		215.479	68.9708	77.5176	89.4231	92.1177	91.6607	0	0	75.5299	58.6263	55.7574	65.7432
CADAFLAG00001484	AFLA_087050	5	1	39	113	671	562	1	0	67	196	118	86		303.909	77.8206	87.4641	123.928	50.5744	49.4244	1424.62	0	55.4352	68.5987	61.3519	53.1615
CADAFLAG00001485	AFLA_087060	0	0	2	5	35	24	0	0	4	10	4	6		0	0	1.70429	2.08357	1.00236	0.80198	0	0	1.25753	1.32986	0.79023	1.40928
CADAFLAG00001486	AFLA_087070	0	0	36	3	55	44	0	0	9	7	5	3		0	0	42.7848	1.74355	2.19681	2.05059	0	0	3.94616	1.29831	1.37765	0.982747
CADAFLAG00001487	AFLA_087080	0	0	3	7	336	312	0	0	31	29	29	22		0	0	2.74871	3.1364	10.3464	11.2099	0	0	10.4789	4.14668	6.16008	5.55602
CADAFLAG00001488	AFLA_087090	2	2	61	91	2366	1997	0	0	247	241	155	105		40.8058	52.2447	45.9212	33.5005	59.8606	58.9524	0	0	68.6003	28.3136	27.0518	21.7874
CADAFLAG00001489	AFLA_087100	0	0	1	0	13	13	0	0	2	3	1	1		0	0	1.96336	0	0.857802	1.00088	0	0	1.44869	0.919214	0.455178	0.541171
CADAFLAG00001490	AFLA_087110	1	0	20	60	702	605	0	0	57	145	75	67		97.4957	0	71.946	105.549	84.8705	85.3438	0	0	75.648	81.4029	62.5488	66.4332
CADAFLAG00001491	AFLA_087120	2	2	35	55	865	729	0	1	63	129	88	93		61.0372	78.1475	39.4116	30.2862	32.7352	32.1902	0	392.754	26.1723	22.6694	22.9731	28.8651
CADAFLAG00001492	AFLA_087130	0	0	20	32	679	600	0	0	50	151	80	74		0	0	32.5505	25.4685	37.1399	38.2929	0	0	30.0222	38.353	30.1855	33.1965
CADAFLAG00001493	AFLA_087140	3	1	63	80	2195	1805	0	0	288	449	425	364		47.8032	20.4012	37.0397	23.0008	43.3715	41.6145	0	0	62.4691	41.1972	57.9291	58.9878
CADAFLAG00001494	AFLA_087150	0	0	0	1	8	3	0	0	1	0	1	0		0	0	0	1.55097	0.852726	0.373111	0	0	1.1701	0	0.735288	0
CADAFLAG00001495	AFLA_087160	1	0	22	58	1162	1025	0	0	73	203	113	81		15.3453	0	12.4563	16.0591	22.1113	22.7578	0	0	15.2488	17.9373	14.8329	12.6411
CADAFLAG00001496	AFLA_087170	8	7	368	896	3737	3267	0	0	386	1519	1052	849		146.182	163.766	248.11	295.413	84.6763	86.3744	0	0	96.0128	159.826	164.434	157.775
CADAFLAG00001497	AFLA_087180	1	1	90	199	1872	1706	0	0	214	347	261	225		45.255	57.9412	150.28	162.494	105.053	111.706	0	0	131.831	90.4237	101.037	103.556
CADAFLAG00001498	AFLA_087190	0	0	3	3	5	5	0	0	3	3	0	1		0	0	18.4827	9.03839	1.03528	1.20796	0	0	6.81884	2.88443	0	1.69816
CADAFLAG00001499	AFLA_087210	1	0	45	118	507	400	0	0	80	159	89	70		38.8419	0	64.4917	82.6989	24.4198	22.4797	0	0	42.2987	35.5618	29.5708	27.6518
CADAFLAG00001500	AFLA_087220	2	0	82	175	526	421	0	0	71	154	110	90		67.777	0	102.531	107.006	22.1041	20.6427	0	0	32.7527	30.051	31.8872	31.0184
CADAFLAG00001501	AFLA_087230	1	4	28	76	674	564	1	0	57	177	83	78		59.5363	304.904	61.508	81.6419	49.7595	48.5839	1395.42	0	46.1949	60.6794	42.27	47.2282
CADAFLAG00001502	AFLA_087240	1	0	12	24	111	107	0	0	25	53	19	25		51.5137	0	22.8084	22.3075	7.09055	7.97513	0	0	17.5307	15.7212	8.37237	13.0975
CADAFLAG00001503	AFLA_087250	0	1	45	79	1174	1053	0	0	107	259	158	169		0	20.2384	26.2458	22.5321	23.0122	24.0833	0	0	23.0238	23.5745	21.3641	27.1687
CADAFLAG00001504	AFLA_087260	0	0	14	10	786	710	0	0	87	71	164	153		0	0	68.8438	24.0471	129.898	136.91	0	0	157.834	54.4866	186.965	207.378
CADAFLAG00001505	AFLA_087270	4	4	28	86	1199	1017	0	0	85	114	60	43		105.842	135.513	27.3369	41.0597	39.3417	38.936	0	0	30.6165	17.3696	13.5807	11.5716
CADAFLAG00001506	AFLA_087280	19	36	399	1356	18883	16765	1	1	1163	3612	1197	1183		672.103	1630.44	520.771	865.485	828.3	858.059	829.099	455.237	560.014	735.726	362.2	425.591
CADAFLAG00001507	AFLA_087290	0	0	1	4	111	123	0	0	5	9	8	4		0	0	4.87271	9.5314	18.1776	23.5026	0	0	8.98848	6.84396	9.03735	5.37235
CADAFLAG00001508	AFLA_087300	0	0	0	2	67	61	0	0	7	12	14	3		0	0	0	2.02404	4.65995	4.95032	0	0	5.3445	3.8756	6.71695	1.71127
CADAFLAG00001509	AFLA_087310	0	2	7	12	308	276	0	0	53	64	49	44		0	90.7274	9.15118	7.67161	13.5323	14.1491	0	0	25.5623	13.0573	14.851	15.855
CADAFLAG00001510	AFLA_087320	2	3	83	122	552	510	0	0	105	247	155	127		58.576	112.495	89.6932	64.4715	20.0477	21.6118	0	0	41.8617	41.6556	38.8324	37.8285
CADAFLAG00001511	AFLA_087330	2	1	47	120	1228	938	0	0	117	320	205	146		24.7476	15.8425	21.4582	26.7918	18.8424	16.7934	0	0	19.7073	22.8003	21.6985	18.3731
CADAFLAG00001512	AFLA_087340	0	0	0	2	24	29	0	0	3	6	2	3		0	0	0	3.64046	3.00231	4.23291	0	0	4.11972	3.48535	1.72588	3.07791
CADAFLAG00001513	AFLA_087350	2	4	121	157	4379	3429	0	0	292	753	376	307		32.8662	84.1589	73.3662	46.5518	89.2337	81.5302	0	0	65.319	71.2526	52.8542	51.3078
CADAFLAG00001514	AFLA_087360	2	2	28	71	682	590	1	1	65	177	95	112		56.5247	72.3701	29.1983	36.2063	23.9016	24.1264	662.419	363.718	25.0069	28.805	22.967	32.1923
CADAFLAG00001515	AFLA_087370	4	1	61	159	2210	1932	0	1	159	382	207	199		199.682	63.9145	112.357	143.217	136.806	139.546	0	642.443	108.047	109.807	88.3937	101.032
CADAFLAG00001516	AFLA_087380	1	1	25	39	1345	1191	0	0	94	202	169	138		61.8164	79.1452	57.0211	43.4997	103.1	106.524	0	0	79.0986	71.9021	89.3641	86.7577
CADAFLAG00001517	AFLA_087390	0	0	6	10	370	306	0	0	42	31	42	43		0	0	11.4448	9.32788	23.7193	22.8885	0	0	29.5564	9.22812	18.5732	22.6078
CADAFLAG00001518	AFLA_087400	1	4	65	100	3082	2532	0	0	270	441	542	398		35.518	181.898	85.183	64.0864	135.742	130.12	0	0	130.542	90.1931	164.672	143.766
CADAFLAG00001519	AFLA_087410	1	0	16	31	568	431	0	0	44	98	48	45		29.8293	0	17.6098	16.6848	21.01	18.6016	0	0	17.8662	16.8327	12.2477	13.6515
CADAFLAG00001520	AFLA_087420	2	0	10	16	236	193	0	0	29	60	44	35		95.5714	0	17.6315	13.7954	13.9844	13.344	0	0	18.864	16.5096	17.9855	17.0095
CADAFLAG00001521	AFLA_087430	11	9	362	1027	9214	7750	0	5	785	2169	933	690		493.196	516.642	598.862	830.835	512.282	502.759	0	2885.04	479.108	559.98	357.833	314.631
CADAFLAG00001522	AFLA_087440	3	3	31	47	594	543	0	0	79	144	89	65		100.881	129.161	38.4628	28.517	24.769	26.4192	0	0	36.162	27.8828	25.6006	22.2293
CADAFLAG00001523	AFLA_087450	0	1	2	5	182	144	0	0	14	20	21	24		0	73.5143	4.23714	5.18011	12.9586	11.9631	0	0	10.9425	6.61253	10.3144	14.0148
CADAFLAG00001524	AFLA_087460	0	0	0	0	4	5	0	0	0	0	0	3		0	0	0	0	1.38568	2.02102	0	0	0	0	0	8.52344
CADAFLAG00001525	AFLA_087470	2	2	12	19	509	477	0	0	39	91	39	46		81.383	104.197	18.0167	13.95	25.6836	28.0836	0	0	21.6026	21.3222	13.575	19.0365
CADAFLAG00001526	AFLA_087480	3	1	70	183	1351	1094	0	0	124	396	215	182		322.819	137.771	277.925	355.309	180.272	170.328	0	0	181.634	245.369	197.901	199.175
CADAFLAG00001527	AFLA_087490	0	0	7	13	266	209	0	0	23	51	32	29		0	0	10.8126	9.81981	13.8089	12.6596	0	0	13.1071	12.2942	11.4595	12.3471
CADAFLAG00001528	AFLA_087500	1	0	74	77	4327	3579	0	1	251	442	727	560		18.4351	0	50.3348	25.6126	98.9161	95.4638	0	237.247	62.9878	46.9196	114.644	104.993
CADAFLAG00001529	AFLA_087510	0	0	7	8	99	65	0	0	17	29	13	19		0	0	60.5159	33.8211	28.764	22.0356	0	0	54.2208	39.1259	26.0553	45.275
CADAFLAG00001530	AFLA_087520	3	3	49	107	768	634	0	0	98	284	150	77		104.011	133.168	62.6823	66.9359	33.0182	31.8037	0	0	46.251	56.6973	44.4858	27.1502
CADAFLAG00001531	AFLA_087530	0	1	32	64	1006	722	1	0	53	96	87	67		0	19.5164	17.9978	17.6026	19.0157	15.9238	357.275	0	10.9974	8.42629	11.3441	10.3867
CADAFLAG00001532	AFLA_087540	0	0	5	5	135	127	0	0	18	13	17	8		0	0	6.1609	3.0128	5.5905	6.13645	0	0	8.18261	2.49984	4.85628	2.71705
CADAFLAG00001533	AFLA_087550	3	0	31	94	1970	1669	0	0	208	355	281	240		57.5955	0	21.9594	32.5621	46.8995	46.3612	0	0	54.3585	39.2448	46.1472	46.8601
CADAFLAG00001534	AFLA_087560	1	0	11	27	550	427	0	0	41	81	57	60		122.074	0	49.546	59.4711	83.2572	75.4196	0	0	68.1311	56.9372	59.5212	74.4906
CADAFLAG00001535	AFLA_087570	0	0	3	12	235	186	0	0	22	44	24	7		0	0	8.5079	16.6421	22.3982	20.6849	0	0	23.0181	19.4737	15.7795	5.47184
CADAFLAG00001536	AFLA_087580	0	3	71	131	2716	2443	0	0	221	590	397	329		0	160.799	109.671	98.9535	140.996	147.978	0	0	125.942	142.226	142.169	140.076
CADAFLAG00001537	AFLA_087590	0	0	0	1	8	16	0	0	1	2	0	1		0	0	0	0.534925	0.294103	0.686321	0	0	0.403564	0.341422	0	0.301509
CADAFLAG00001538	AFLA_087600	0	0	28	66	1306	1075	0	0	76	180	118	90		0	0	52.6594	60.7	82.5476	79.2806	0	0	52.7324	52.8306	51.4495	46.6546
CADAFLAG00001539	AFLA_087610	3	3	86	154	3419	2725	0	0	309	578	392	301		95.1541	121.828	100.646	88.1342	134.474	125.056	0	0	133.414	105.565	106.357	97.0952
CADAFLAG00001540	AFLA_087620	0	0	24	28	557	464	0	0	77	136	100	96		0	0	42.039	23.9842	32.7899	31.8713	0	0	49.7597	37.1771	40.609	46.3497
CADAFLAG00001541	AFLA_087630	3	1	41	117	1362	1161	0	0	300	238	337	307		90.7929	38.7482	45.7832	63.8902	51.1143	50.8387	0	0	123.592	41.4757	87.2434	94.4918
CADAFLAG00001542	AFLA_087640	0	2	67	159	3103	2572	0	0	388	393	564	424		0	40.4329	39.0346	45.3	60.7575	58.7606	0	0	83.3974	35.7324	76.179	68.0887
CADAFLAG00001543	AFLA_087650	6	1	28	58	1113	875	0	0	76	204	132	96		121.226	25.868	20.8734	21.1441	27.8851	25.5789	0	0	20.9023	23.7334	22.8134	19.726
CADAFLAG00001544	AFLA_087660	1	0	20	51	634	480	0	0	38	105	63	59		45.682	0	33.7106	42.0371	35.9144	31.7261	0	0	23.6301	27.6198	24.6183	27.4108
CADAFLAG00001545	AFLA_087670	0	1	8	28	281	248	0	1	19	46	23	35		0	18.9015	4.35771	7.45851	5.14419	5.29736	0	189.991	3.81828	3.9104	2.90454	5.25497
CADAFLAG00001546	AFLA_087680	0	0	7	6	76	59	0	0	7	7	8	5		0	0	10.1132	4.23903	3.69017	3.34258	0	0	3.73107	1.57827	2.67954	1.9911
CADAFLAG00001547	AFLA_087690	0	0	0	1	22	22	0	0	2	3	6	0		0	0	0	2.93411	4.43624	5.17621	0	0	4.42716	2.80909	8.34606	0
CADAFLAG00001548	AFLA_087700	0	0	0	0	4	8	0	0	1	0	0	1		0	0	0	0	0.727832	1.69847	0	0	1.99744	0	0	1.49232
CADAFLAG00001549	AFLA_087710	4	7	176	590	5397	4317	0	2	419	1065	465	392		200.37	448.944	325.295	533.265	335.244	312.887	0	1289.32	285.71	307.192	199.25	199.703
CADAFLAG00001550	AFLA_087720	0	0	3	13	167	205	0	0	20	30	10	11		0	0	8.55316	18.1249	16.0017	22.9192	0	0	21.0369	13.3482	6.60977	8.64434
CADAFLAG00001551	AFLA_087730	0	0	5	9	184	145	0	0	16	39	10	9		0	0	7.36261	6.48083	9.10589	8.37278	0	0	8.69215	8.96233	3.41384	3.6529
CADAFLAG00001552	AFLA_087740	2	2	52	108	1767	1622	0	1	144	379	206	176		38.2789	49.0095	36.7219	37.2968	41.9373	44.9171	0	246.312	37.5171	41.7691	33.7264	34.2585
CADAFLAG00001553	AFLA_087750	0	0	3	5	98	81	0	0	5	13	9	10		0	0	4.27658	3.48555	4.6951	4.52794	0	0	2.62961	2.8921	2.9744	3.92924
CADAFLAG00001554	AFLA_087760	69	38	843	2045	16148	14320	3	1	1419	5516	2458	2348		3188.82	2248.46	1437.47	1705.27	925.411	957.537	3249.58	594.753	892.69	1467.88	971.707	1103.58
CADAFLAG00001555	AFLA_087770	1	2	21	59	789	633	0	0	60	167	96	84		19.6309	50.2679	15.2108	20.8982	19.2066	17.9794	0	0	16.0335	18.8774	16.1207	16.7704
CADAFLAG00001556	AFLA_087780	0	0	13	6	206	169	0	0	63	15	24	23		0	0	65.1212	14.6979	34.6808	33.1975	0	0	116.43	11.7264	27.8722	31.7571
CADAFLAG00001557	AFLA_087790	0	0	51	92	1547	1335	0	0	128	246	148	108		0	0	32.2357	28.4368	32.8625	33.0894	0	0	29.8485	24.2659	21.6875	18.8159
CADAFLAG00001558	AFLA_087800	0	0	3	8	119	106	0	0	15	15	17	16		0	0	17.8666	23.299	23.8183	24.7552	0	0	32.9577	13.9414	23.472	26.2648
CADAFLAG00001559	AFLA_087810	3	9	146	308	7020	5943	1	1	434	1089	539	401		157.331	604.303	282.512	291.447	456.524	450.951	1229.18	674.913	309.827	328.856	241.798	213.876
CADAFLAG00001560	AFLA_087820	4	3	73	75	1438	1206	2	0	286	438	396	292		166.975	160.337	112.436	56.49	74.4365	72.8402	1956.8	0	162.516	105.282	141.403	123.965
CADAFLAG00001561	AFLA_087830	0	1	7	14	308	249	0	0	34	44	41	32		0	16.3725	3.3028	3.23027	4.88403	4.60706	0	0	5.91847	3.23991	4.48487	4.16168
CADAFLAG00001562	AFLA_087840	1	0	12	18	281	234	0	0	28	55	39	26		18.3652	0	8.13145	5.96465	6.39935	6.21788	0	0	6.99988	5.81626	6.12678	4.85617
CADAFLAG00001563	AFLA_087850	0	0	1	0	19	10	0	0	0	4	1	1		0	0	1.23502	0	0.788624	0.484299	0	0	0	0.770954	0.286322	0.340414
CADAFLAG00001564	AFLA_087860	0	0	1	3	68	56	0	0	1	10	7	3		0	0	1.97058	2.89096	4.50346	4.32735	0	0	0.727009	3.07531	3.19796	1.62948
CADAFLAG00001565	AFLA_087870	0	0	8	11	487	471	0	0	28	69	40	23		0	0	12.8383	8.63248	26.2657	29.64	0	0	16.5775	17.2807	14.8819	10.1737
CADAFLAG00001566	AFLA_087880	2	8	171	182	3107	2585	0	1	471	1130	530	466		89.3961	457.824	282.017	146.784	172.212	167.178	0	575.233	286.58	290.839	202.645	211.836
CADAFLAG00001567	AFLA_087890	0	0	6	6	213	144	0	0	19	28	35	23		0	0	2.62744	1.28487	3.13476	2.47277	0	0	3.06959	1.91353	3.55329	2.77615
CADAFLAG00001568	AFLA_087900	15	8	360	708	12447	10483	0	0	826	2421	1234	1054		413.478	282.34	366.147	352.137	425.461	418.098	0	0	309.94	384.275	290.97	295.479
CADAFLAG00001569	AFLA_087910	6	3	78	155	1694	1411	0	0	171	493	272	259		799.644	511.902	383.558	372.73	279.958	272.084	0	0	310.226	378.337	310.089	351.051
CADAFLAG00001570	AFLA_087920	0	1	22	49	1062	890	0	1	125	196	193	139		0	40.8772	25.9164	28.2276	42.0455	41.1132	0	410.881	54.326	36.0332	52.7096	45.1336
CADAFLAG00001571	AFLA_087930	0	0	6	8	65	61	0	0	13	26	12	14		0	0	4.54878	2.96592	1.65615	1.81348	0	0	3.63607	3.07618	2.10914	2.92554
CADAFLAG00001572	AFLA_087940	0	0	4	5	459	394	0	0	165	49	209	173		0	0	7.17054	4.38317	27.6533	27.6967	0	0	109.124	13.7083	86.8599	85.4814
CADAFLAG00001573	AFLA_087950	4	6	98	236	1126	1050	1	1	137	701	273	196		150.537	289.105	136.082	160.256	52.5481	57.1749	882.082	484.329	70.1846	151.911	87.8859	75.018
CADAFLAG00001574	AFLA_087960	0	1	6	11	105	81	0	0	10	32	12	9		0	187.87	32.4847	29.1237	19.1056	17.197	0	0	19.9744	27.0379	15.0623	13.4309
CADAFLAG00001575	AFLA_087970	0	3	31	102	1081	874	0	0	74	244	138	79		0	92.0748	27.419	44.1181	32.1336	30.3139	0	0	24.1473	33.6802	28.2977	19.2598
CADAFLAG00001576	AFLA_087980	2	0	79	129	2478	2199	0	0	179	483	299	264		58.9325	0	85.8901	68.5855	90.5442	93.7522	0	0	71.7984	81.9517	75.3648	79.1141
CADAFLAG00001577	AFLA_087990	2	3	34	100	689	590	0	0	74	184	108	79		169.905	326.3	106.573	153.283	72.5821	72.5202	0	0	85.5745	90.0077	78.4823	68.254
CADAFLAG00001578	AFLA_088000	0	0	0	2	53	50	0	0	1	8	11	8		0	0	0	1.85239	3.37362	3.71353	0	0	0.698751	2.36462	4.83004	4.17638
CADAFLAG00001579	AFLA_088010	2	2	61	168	1582	1265	0	0	117	321	138	118		56.8566	72.795	63.9841	86.1743	55.7689	52.0323	0	0	45.2766	52.5463	33.5585	34.116
CADAFLAG00001580	AFLA_088020	2	2	37	86	669	563	0	0	48	162	80	75		71.9151	92.0748	49.0889	55.7964	29.8298	29.2907	0	0	23.4946	33.5422	24.6067	27.4269
CADAFLAG00001581	AFLA_088030	1	2	29	52	704	606	0	0	77	154	83	70		28.7661	73.6599	30.7801	26.9899	25.1124	25.2223	0	0	30.1514	25.5086	20.4235	20.4788
CADAFLAG00001582	AFLA_088040	1	1	20	54	919	779	0	0	49	167	102	77		13.2062	16.9083	9.74542	12.8674	15.0497	14.885	0	0	8.80871	12.6994	11.5226	10.3418
CADAFLAG00001583	AFLA_088050	0	1	24	51	984	882	0	0	62	170	122	89		0	31.9024	22.0651	22.9293	30.4041	31.7982	0	0	21.0296	24.3915	26.0037	22.5537
CADAFLAG00001584	AFLA_088060	7	4	84	212	2430	2207	0	1	273	683	396	368		295.605	216.269	130.883	161.535	127.249	134.849	0	543.462	156.933	166.081	143.048	158.047
CADAFLAG00001585	AFLA_088070	0	1	34	82	1129	862	0	0	155	305	187	142		0	18.2523	17.8841	21.0925	19.9584	17.7802	0	0	30.0792	25.0371	22.804	20.5879
CADAFLAG00001586	AFLA_088080	1	0	18	30	569	484	0	0	59	150	113	85		31.4434	0	20.883	17.0204	22.1859	22.0195	0	0	25.2533	27.1586	30.3935	27.1815
CADAFLAG00001587	AFLA_088090	1	2	83	194	2930	2628	0	0	239	639	382	323		22.1784	56.7912	67.9203	77.6336	80.581	84.331	0	0	72.1548	81.6051	72.4713	72.8548
CADAFLAG00001588	AFLA_088100	1	0	1	4	23	17	0	0	2	5	2	4		28.1528	0	1.03876	2.03189	0.802942	0.692472	0	0	0.766459	0.810547	0.481642	1.14527
CADAFLAG00001589	AFLA_088110	0	0	33	67	1636	1411	0	0	114	281	222	214		0	0	48.196	47.8518	80.3015	80.8098	0	0	61.4253	64.0469	75.1676	86.1479
CADAFLAG00001590	AFLA_088120	0	0	26	50	1452	1227	0	0	88	260	188	147		0	0	92.0877	86.6014	172.838	170.417	0	0	114.989	143.713	154.372	143.509
CADAFLAG00001591	AFLA_088130	0	0	25	48	1844	1471	0	0	103	225	207	187		0	0	17.7718	16.6863	44.0551	41.0057	0	0	27.0131	24.9614	34.1148	36.641
CADAFLAG00001592	AFLA_088140	1	0	15	37	261	242	0	0	26	56	48	25		58.1074	0	32.1599	38.7928	18.8064	20.346	0	0	20.5656	18.7373	23.8586	14.774
CADAFLAG00001593	AFLA_088150	5	0	56	149	898	745	0	0	88	270	139	144		242.924	0	100.388	130.618	54.1017	52.3707	0	0	58.1996	75.5354	57.768	71.1522
CADAFLAG00001594	AFLA_088160	0	1	2	5	53	62	0	0	8	17	6	13		0	46.1516	2.66004	3.25203	2.36907	3.23363	0	0	3.92549	3.5286	1.85008	4.76579
CADAFLAG00001595	AFLA_088170	3	1	30	56	738	677	0	0	68	170	118	67		73.8654	31.5239	27.2541	24.8786	22.5326	24.1179	0	0	22.7911	24.1021	24.8527	16.7772
CADAFLAG00001596	AFLA_088180	0	1	12	22	391	311	0	0	29	60	35	26		0	86.107	29.7777	26.6967	32.6084	30.2628	0	0	26.5493	23.2357	20.1353	17.7835
CADAFLAG00001597	AFLA_088190	2	0	30	60	1003	834	0	0	77	180	131	97		57.7609	0	31.9681	31.266	35.9202	34.8499	0	0	30.2713	29.9338	32.3629	28.4905
CADAFLAG00001598	AFLA_088200	5	1	50	131	2316	2133	0	2	173	413	235	197		92.0587	23.573	33.9669	43.5195	52.8771	56.8221	0	473.893	43.3589	43.7856	37.0113	36.8881
CADAFLAG00001599	AFLA_088210	0	0	1	13	159	135	0	0	15	23	17	17		0	0	4.7857	30.4239	25.5732	25.3349	0	0	26.4839	17.1778	18.8614	22.4248
CADAFLAG00001600	AFLA_088220	1	0	20	54	508	413	0	0	34	121	71	44		73.7404	0	54.416	71.8484	46.4519	44.0643	0	0	34.1288	51.378	44.7854	32.9977
CADAFLAG00001601	AFLA_088230	0	1	6	11	137	138	0	0	17	25	26	16		0	49.4657	8.55316	7.66821	6.56355	7.71426	0	0	8.94067	5.56173	8.5927	6.28679
CADAFLAG00001602	AFLA_088240	0	0	17	37	424	359	0	0	43	83	60	50		0	0	19.7656	21.0373	16.568	16.368	0	0	18.4449	15.0604	16.1731	16.0238
CADAFLAG00001603	AFLA_088250	1	1	37	49	1196	1089	0	0	92	175	154	110		52.8249	67.6331	72.1161	46.7038	78.3438	83.2335	0	0	66.1552	53.2308	69.5876	59.0958
CADAFLAG00001604	AFLA_088260	8	2	122	265	2736	2367	0	0	201	725	374	288		335.881	107.509	188.993	200.752	142.445	143.789	0	0	114.876	175.275	134.32	122.974
CADAFLAG00001605	AFLA_088270	0	0	5	13	314	238	0	0	22	35	46	29		0	0	10.8795	13.8328	22.9622	20.3075	0	0	17.6607	11.8851	23.2048	17.3929
CADAFLAG00001606	AFLA_088280	0	0	30	32	529	466	0	0	89	93	127	127		0	0	35.973	18.7643	21.3184	21.912	0	0	39.3723	17.4034	35.3053	41.9752
CADAFLAG00001607	AFLA_088290	0	0	48	42	1269	1081	0	0	308	189	379	305		0	0	68.4253	29.2786	60.7967	60.4284	0	0	161.984	42.0467	125.255	119.842
CADAFLAG00001608	AFLA_088300	6	5	110	190	3236	2419	2	2	213	532	352	277		130.286	139.007	88.1312	74.4418	87.1342	75.9999	1017.89	558.896	62.9596	66.5187	65.3824	61.1717
CADAFLAG00001609	AFLA_088310	2	0	62	82	1446	1174	0	0	117	342	171	147		274.092	0	313.508	202.767	245.736	232.791	0	0	218.267	269.885	200.463	204.884
CADAFLAG00001610	AFLA_088320	5	3	108	157	2816	2247	0	0	218	578	388	315		232.058	178.266	184.945	131.475	162.067	150.89	0	0	137.728	154.469	154.039	148.684
CADAFLAG00001611	AFLA_088330	0	0	3	4	144	128	0	0	14	11	16	6		0	0	3.14061	2.04776	5.06639	5.25464	0	0	5.40713	1.79713	3.88324	1.73132
CADAFLAG00001612	AFLA_088340	1	2	48	82	1493	1118	0	0	120	226	187	128		13.0169	33.3317	23.0537	19.2592	24.0992	21.0562	0	0	21.2631	16.9396	20.822	16.945
CADAFLAG00001613	AFLA_088350	2	0	9	33	389	330	0	0	29	77	36	34		37.5857	0	6.2406	11.1898	9.06518	8.973	0	0	7.41869	8.33238	5.78718	6.49825
CADAFLAG00001614	AFLA_088360	1	1	21	20	531	449	0	0	47	83	64	53		88.5784	113.409	68.6339	31.9651	58.3253	57.5447	0	0	56.6712	42.3343	48.4931	47.7451
CADAFLAG00001615	AFLA_088370	48	30	773	1988	17153	15030	1	1	1410	5265	2538	2216		3612.9	2891.05	2146.77	2699.9	1600.99	1636.83	1764.16	968.657	1444.68	2281.91	1634.1	1696.33
CADAFLAG00001616	AFLA_088380	1	1	76	158	4449	3866	0	0	389	621	534	411		24.131	30.8955	67.6675	68.7939	133.129	134.98	0	0	127.78	86.2885	110.227	100.865
CADAFLAG00001617	AFLA_088390	1	0	32	52	573	471	0	0	64	265	110	89		17.5657	0	20.7399	16.4811	12.4812	11.9707	0	0	15.3032	26.8039	16.5284	15.8994
CADAFLAG00001618	AFLA_088400	0	0	5	9	54	54	0	0	5	20	9	8		0	0	7.79067	6.85762	2.82775	3.29943	0	0	2.87422	4.86328	3.25108	3.4358
CADAFLAG00001619	AFLA_088410	3	1	47	77	762	609	0	0	73	238	89	83		88.3987	37.7264	51.0992	40.9386	27.8429	25.9641	0	0	29.2809	40.382	22.433	24.873
CADAFLAG00001620	AFLA_088420	2	0	4	11	158	106	1	0	18	50	17	21		186.242	0	13.7435	18.4824	18.2448	14.2818	2182.59	0	22.8169	26.8104	13.5415	19.888
CADAFLAG00001621	AFLA_088430	4	5	23	72	758	566	0	0	71	167	69	67		199.682	319.572	42.3641	64.8528	46.9226	40.8815	0	0	48.2474	48.0044	29.4646	34.0156
CADAFLAG00001622	AFLA_088440	1	3	31	79	1072	928	0	0	103	195	128	92		30.9741	118.971	35.4284	44.1513	41.1745	41.589	0	0	43.4283	34.7792	33.9142	28.9809
CADAFLAG00001623	AFLA_088450	1	0	29	49	1160	977	0	0	88	186	134	112		72.6343	0	77.7197	64.2178	104.48	102.676	0	0	87.0085	77.7931	83.2566	82.7342
CADAFLAG00001624	AFLA_088460	4	4	27	86	1357	1083	0	0	103	200	115	113		74.0222	94.7726	18.4356	28.7156	31.1398	28.9976	0	0	25.9464	21.3117	18.2042	21.267
CADAFLAG00001625	AFLA_088470	2	3	28	57	957	824	1	0	87	115	79	71		39.4752	75.8116	20.3912	20.2995	23.4229	23.5317	462.613	0	23.3749	13.0701	13.3381	14.2521
CADAFLAG00001626	AFLA_088480	1	0	29	51	929	763	0	0	111	154	167	138		50.208	0	53.7233	46.202	57.8393	55.428	0	0	75.8636	44.5226	71.7236	70.4657
CADAFLAG00001627	AFLA_088490	0	0	14	35	633	510	0	0	40	105	80	78		0	0	33.4999	40.9552	50.9052	47.8548	0	0	35.3119	39.2102	44.3799	51.445
CADAFLAG00001628	AFLA_088500	1	0	45	47	905	795	0	0	87	157	114	102		20.4029	0	33.8763	17.3024	22.8968	23.4688	0	0	24.1628	18.445	19.8961	21.1649
CADAFLAG00001629	AFLA_088510	0	0	0	1	3	2	0	0	0	0	0	0		0	0	0	3.27642	0.675519	0.525464	0	0	0	0	0	0
CADAFLAG00001630	AFLA_088520	1	4	79	124	1805	1590	0	0	183	424	279	245		36.1365	185.066	105.333	80.8509	80.883	83.1331	0	0	90.0189	88.2262	86.2427	90.0403
CADAFLAG00001631	AFLA_088530	0	0	2	7	140	83	0	0	19	27	21	21		0	0	1.22935	2.10412	2.89213	2.00062	0	0	4.3087	2.59003	2.99259	3.55795
CADAFLAG00001632	AFLA_088540	0	2	52	75	1669	1427	0	0	105	214	167	140		0	69.5294	52.097	36.7449	56.1964	56.0626	0	0	38.8101	33.4594	38.7888	38.6608
CADAFLAG00001633	AFLA_088550	1	3	82	130	2611	2373	0	0	262	645	407	368		41.075	157.768	124.275	96.3471	132.99	141.028	0	0	146.493	152.554	143.003	153.727
CADAFLAG00001634	AFLA_088560	0	2	40	82	1113	827	0	0	97	220	178	117		0	31.3116	18.0471	18.092	16.8766	14.6316	0	0	16.146	15.4905	18.6186	14.5501
CADAFLAG00001635	AFLA_088570	0	3	519	1001	27117	24539	1	0	2332	4729	2695	2670		0	313.468	1562.83	1474.02	2744.28	2897.61	1912.83	0	2590.7	2222.32	1881.41	2216.09
CADAFLAG00001636	AFLA_088580	0	0	0	2	16	7	0	0	2	1	1	0		0	0	0	4.59848	2.52826	1.29061	0	0	3.46924	0.733758	1.09003	0
CADAFLAG00001637	AFLA_088590	2	3	52	102	1052	934	0	0	97	283	158	124		79.8179	153.289	76.5711	73.4494	52.062	53.9323	0	0	52.6962	65.0344	53.9386	50.3289
CADAFLAG00001638	AFLA_088600	0	0	10	9	154	157	0	0	23	50	17	16		0	0	27.6288	12.1599	14.2996	17.0099	0	0	23.4442	21.5589	10.8891	12.1847
CADAFLAG00001639	AFLA_088610	0	0	40	51	645	572	0	0	134	228	322	250		0	0	50.0154	31.1846	27.1048	28.0465	0	0	61.815	44.4911	93.3427	86.1623
CADAFLAG00001640	AFLA_088620	2	3	54	139	1748	1644	0	0	140	486	228	217		77.6837	149.191	77.3901	97.4165	84.193	92.3918	0	0	74.0227	108.698	75.7543	85.7206
CADAFLAG00001641	AFLA_088630	2	1	27	51	1059	859	0	0	80	162	79	84		65.7324	42.0794	32.742	30.2439	43.1598	40.8483	0	0	35.7912	30.6585	22.21	28.0772
CADAFLAG00001642	AFLA_088640	0	0	12	22	354	321	0	0	37	77	35	34		0	0	88.1092	78.9931	87.3548	92.4241	0	0	100.228	88.2319	59.5785	68.8102
CADAFLAG00001643	AFLA_088650	1	3	123	264	4508	3790	0	1	399	943	680	547		86.4694	332.127	392.427	411.893	483.371	474.169	0	1112.8	469.648	469.527	502.972	481.033
CADAFLAG00001644	AFLA_088660	3	0	24	55	793	722	0	0	79	203	121	93		142.887	0	42.1769	47.2664	46.836	49.7554	0	0	51.2196	55.6742	49.298	45.0485
CADAFLAG00001645	AFLA_088670	1	2	75	138	1952	1708	0	0	213	435	239	213		24.2924	62.2044	67.2238	60.4877	58.801	60.033	0	0	70.4348	60.848	49.6639	52.623
CADAFLAG00001646	AFLA_088680	2	1	54	108	1801	1488	0	0	143	308	212	175		66.1816	42.367	65.9314	64.4835	73.9019	71.2429	0	0	64.414	58.6873	60.0089	58.8939
CADAFLAG00001647	AFLA_088690	0	1	41	62	920	772	0	0	101	196	138	116		0	18.825	22.2428	16.4484	16.774	16.4234	0	0	20.215	16.5942	17.3567	17.3459
CADAFLAG00001648	AFLA_088700	2	2	89	172	3148	2679	0	0	312	524	366	311		39.156	50.1324	64.2909	60.7595	76.4253	75.8878	0	0	83.1495	59.0725	61.2945	61.9232
CADAFLAG00001649	AFLA_088710	1	1	18	37	651	467	0	0	54	98	86	61		26.2376	33.5926	17.4256	17.5163	21.1806	17.7285	0	0	19.2865	14.8059	19.3016	16.2772
CADAFLAG00001650	AFLA_088720	2	3	81	149	2216	2057	1	0	200	484	263	293		122.59	235.432	183.189	164.789	168.433	182.427	1436.64	0	166.875	170.826	137.896	182.649
CADAFLAG00001651	AFLA_088730	2	0	22	38	683	589	0	0	51	94	80	62		30.17	0	12.245	10.343	12.7762	12.8556	0	0	10.4726	8.16506	10.323	9.51179
CADAFLAG00001652	AFLA_088740	1	0	20	34	527	438	0	0	42	102	80	56		54.8183	0	40.4527	33.6296	35.8237	34.7401	0	0	31.341	32.1968	37.5135	31.2204
CADAFLAG00001653	AFLA_088750	6	0	78	167	1511	1303	0	1	163	420	224	236		207.034	0	99.306	103.974	64.653	65.0527	0	444.064	76.5622	83.4498	66.1165	82.8184
CADAFLAG00001654	AFLA_088760	12	6	210	457	4791	3857	0	2	398	1215	523	447		511.209	327.257	330.087	351.278	253.092	237.738	0	1096.49	230.801	298.044	190.586	193.665
CADAFLAG00001655	AFLA_088770	6	2	82	205	2185	2062	0	1	230	588	273	266		249.032	106.281	125.577	153.524	112.458	123.829	0	534.145	129.948	140.529	96.9256	112.282
CADAFLAG00001656	AFLA_088780	0	2	34	85	1211	928	0	0	66	209	93	102		0	69.0134	33.8106	41.3351	40.4726	36.1878	0	0	24.2139	32.4351	21.4407	27.9581
CADAFLAG00001657	AFLA_088790	0	1	72	112	2002	1606	0	0	165	310	234	251		0	101.082	209.738	159.547	195.998	183.456	0	0	177.327	140.929	158.031	201.536
CADAFLAG00001658	AFLA_088800	0	0	5	17	145	140	0	0	16	41	19	10		0	0	31.1627	51.8131	30.3722	34.2163	0	0	36.79	39.8789	27.4536	17.179
CADAFLAG00001659	AFLA_088810	9	16	390	749	6558	5612	1	4	1008	2299	1740	1503		183.884	418.545	294.007	276.122	166.153	165.902	478.88	1051.76	280.349	270.475	304.105	312.31
CADAFLAG00001660	AFLA_088820	0	0	10	12	91	80	0	0	10	16	10	16		0	0	13.922	8.16977	4.25782	4.36749	0	0	5.13627	3.4763	3.22763	6.13983
CADAFLAG00001661	AFLA_088830	0	0	13	41	496	460	0	0	42	103	51	49		0	0	21.1792	32.6646	27.1576	29.3877	0	0	25.2442	26.1878	19.2628	22.0038
CADAFLAG00001662	AFLA_088840	2	1	24	69	447	429	0	0	57	120	75	59		166.021	106.281	73.5083	103.348	46.0125	51.5255	0	0	64.4089	57.3589	53.2558	49.8094
CADAFLAG00001663	AFLA_088850	6	8	133	229	4801	4014	0	0	405	733	563	463		78.5236	134.048	64.2232	54.0757	77.9139	76.0077	0	0	72.1507	55.2381	63.0274	61.6247
CADAFLAG00001664	AFLA_088860	1	2	31	56	1077	933	0	0	77	183	131	112		20.6347	52.8384	23.6022	20.8499	27.5581	27.8556	0	0	21.6285	21.7438	23.1229	23.504
CADAFLAG00001665	AFLA_088870	1	2	58	122	2044	1844	0	0	147	302	174	184		48.1022	123.173	102.94	105.887	121.921	128.339	0	0	96.2541	83.6485	71.5956	90.0135
CADAFLAG00001666	AFLA_022800	0	0	0	0	0	0	0	0	0	0	0	0		0	0	0	0	0	0	0	0	0	0	0	0
CADAFLAG00001667	AFLA_022810	0	0	0	1	13	4	0	0	1	2	1	0		0	0	0	0.502133	0.44862	0.161062	0	0	0.378825	0.320492	0.238053	0
CADAFLAG00001668	AFLA_022820	1	1	34	27	194	149	0	0	29	108	78	74		12.5448	16.0614	15.7374	6.11145	3.01786	2.70446	0	0	4.9522	7.80141	8.37009	9.44105
CADAFLAG00001669	AFLA_022830	1	0	35	39	164	131	0	0	31	159	70	61		24.8322	0	32.0682	17.4742	5.05003	4.70672	0	0	10.4789	22.7352	14.8692	15.4053
CADAFLAG00001670	AFLA_022840	0	0	0	0	0	0	0	0	0	0	0	0		0	0	0	0	0	0	0	0	0	0	0	0
CADAFLAG00001671	AFLA_022850	0	0	0	0	1	0	0	0	0	0	0	0		0	0	0	0	0.0632064	0	0	0	0	0	0	0
CADAFLAG00001672	AFLA_022860	0	0	1	2	59	49	0	0	4	2	3	0		0	0	3.77463	3.69174	7.48462	7.25289	0	0	5.57032	1.17815	2.62529	0
CADAFLAG00001673	AFLA_022870	0	1	3	3	146	136	0	0	11	7	14	5		0	43.6599	3.77463	1.84587	6.17376	6.71015	0	0	5.10613	1.37451	4.08378	1.73403
CADAFLAG00001674	AFLA_022880	6	17	340	638	12935	10930	0	0	1006	945	483	358		145.027	526.098	303.227	278.25	387.702	382.251	0	0	331.003	131.527	99.8658	88.0046
CADAFLAG00001675	AFLA_022990	0	1	6	12	370	302	0	0	28	33	12	15		0	74.9964	12.9677	12.6829	26.8755	25.5952	0	0	22.3262	11.1306	6.01276	8.93586
CADAFLAG00001676	AFLA_023000	0	0	3	11	250	215	0	0	4	10	15	10		0	0	4.74334	8.50516	13.2845	13.3304	0	0	2.33329	2.46751	5.49839	4.3581
CADAFLAG00001677	AFLA_023010	0	0	6	8	3652	3193	0	0	29	35	166	157		0	0	12.1206	7.90292	247.939	252.936	0	0	21.613	11.034	77.7428	87.4188
CADAFLAG00001678	AFLA_023020	0	0	0	0	1	0	0	0	0	0	0	0		0	0	0	0	0.0176261	0	0	0	0	0	0	0
CADAFLAG00001679	AFLA_023030	0	0	0	1	1	1	0	0	0	0	0	0		0	0	0	0.509948	0.0350464	0.0408922	0	0	0	0	0	0
CADAFLAG00001680	AFLA_023040	0	0	9	9	204	192	0	0	15	38	28	9		0	0	6.86199	3.35565	5.22734	5.74049	0	0	4.21934	4.52154	4.94933	1.8914
CADAFLAG00001681	AFLA_023050	0	0	1	3	69	50	0	0	7	10	6	6		0	0	1.20993	1.77503	2.80577	2.3723	0	0	3.12466	1.88823	1.68303	2.00099
CADAFLAG00001682	AFLA_023060	0	0	0	1	10	9	0	0	0	3	2	0		0	0	0	2.66556	1.83192	1.92373	0	0	0	2.55199	2.5274	0
CADAFLAG00001683	AFLA_023070	4	0	53	87	1735	1400	0	0	149	368	162	150		94.5349	0	46.2167	37.0996	50.8471	47.8731	0	0	47.9353	50.0802	32.7506	36.0536
CADAFLAG00001684	AFLA_023080	0	1	129	396	2106	1849	0	0	290	1022	201	145		0	39.4049	146.491	219.909	80.3753	82.3376	0	0	121.497	181.12	52.9174	45.3861
CADAFLAG00001685	AFLA_023090	0	0	5	7	62	55	0	0	7	28	4	1		0	0	19.9999	13.6925	8.33476	8.62702	0	0	10.33	17.4788	3.70936	1.10253
CADAFLAG00001686	AFLA_023100	0	0	2	2	22	15	0	0	1	5	1	1		0	0	3.98511	1.9488	1.47325	1.17204	0	0	0.735117	1.5548	0.461947	0.549218
CADAFLAG00001687	AFLA_023110	2	1	16	16	544	459	0	0	48	89	70	62		62.8868	40.2578	18.5627	9.07752	21.2111	20.8821	0	0	20.5451	16.1141	18.8278	19.8265
CADAFLAG00001688	AFLA_023120	0	0	1	0	2	0	0	0	1	0	0	0		0	0	3.08045	0	0.207056	0	0	0	1.13647	0	0	0
CADAFLAG00001689	AFLA_023130	0	0	0	0	1	0	0	0	0	0	0	0		0	0	0	0	0.10984	0	0	0	0	0	0	0
CADAFLAG00001690	AFLA_023140	0	0	0	0	2	3	0	0	0	1	0	0		0	0	0	0	0.139103	0.243458	0	0	0	0.322967	0	0
CADAFLAG00001691	AFLA_023150	0	0	0	0	1	0	0	0	0	0	0	0		0	0	0	0	0.147654	0	0	0	0	0	0	0
CADAFLAG00001692	AFLA_023160	0	0	0	0	8	5	0	0	0	1	0	1		0	0	0	0	0.857802	0.625553	0	0	0	0.497907	0	0.879402
CADAFLAG00001693	AFLA_023170	0	0	0	0	38	43	0	0	0	3	3	7		0	0	0	0	1.25142	1.65228	0	0	0	0.458767	0.681519	1.89063
CADAFLAG00001694	AFLA_023180	0	0	0	0	28	16	0	0	0	1	1	2		0	0	0	0	3.65498	2.43694	0	0	0	0.606148	0.900461	2.14115
CADAFLAG00001695	AFLA_023190	0	0	1	4	72	58	0	0	6	13	4	5		0	0	1.97058	3.85461	4.76837	4.4819	0	0	4.36205	3.9979	1.82741	2.7158
CADAFLAG00001696	AFLA_023200	0	0	1	0	10	7	0	0	0	1	4	0		0	0	0.976317	0	0.328121	0.267996	0	0	0	0.152365	0.905382	0
CADAFLAG00001697	AFLA_023210	0	0	0	0	13	9	0	0	4	1	1	7		0	0	0	0	0.453837	0.366603	0	0	1.53292	0.162109	0.240821	2.00422
CADAFLAG00001698	AFLA_023220	0	0	0	0	9	5	0	0	0	0	1	1		0	0	0	0	0.802597	0.520262	0	0	0	0	0.615166	0.731384
CADAFLAG00001699	AFLA_023230	0	0	5	6	49	46	0	0	7	13	6	5		0	0	4.62067	2.71152	1.52186	1.66699	0	0	2.3866	1.87488	1.28549	1.27362
CADAFLAG00001700	AFLA_023240	0	0	1	1	8	10	0	0	3	5	1	2		0	0	7.44442	3.64046	2.00154	2.91925	0	0	8.23944	5.80892	1.72588	4.10388
CADAFLAG00001701	AFLA_023250	0	0	30	68	226	239	0	0	74	124	87	107		0	0	72.4321	80.287	18.3384	22.6281	0	0	65.9155	46.7226	48.6979	71.2078
CADAFLAG00001702	AFLA_023260	0	1	16	7	1050	861	0	0	219	140	290	248		0	30.8443	14.2222	3.04278	31.3674	30.0116	0	0	71.8184	19.4209	59.7619	60.7619
CADAFLAG00001703	AFLA_023270	1	0	52	40	535	447	0	0	81	149	152	127		24.0113	0	46.0692	17.3298	15.9296	15.5294	0	0	26.4751	20.601	31.22	31.0131
CADAFLAG00001704	AFLA_023280	0	0	0	0	0	0	0	0	0	0	0	0		0	0	0	0	0	0	0	0	0	0	0	0
CADAFLAG00001705	AFLA_023290	1	0	38	115	1293	1079	0	0	102	270	172	136		41.0363	0	57.5365	85.1498	65.7963	64.0651	0	0	56.9778	63.7997	60.3767	56.7587
CADAFLAG00001706	AFLA_023300	1	0	12	30	137	108	0	0	5	48	34	23		127.429	0	56.4208	68.9772	21.6482	19.9123	0	0	8.67309	35.2204	37.0611	29.8071
CADAFLAG00001707	AFLA_023310	5	0	39	73	101	80	0	0	28	118	58	35		327.182	0	94.1618	86.1905	8.19548	7.57426	0	0	24.941	44.4618	32.4653	23.2923
CADAFLAG00001708	AFLA_023320	1	0	10	9	99	102	0	0	17	35	23	24		130.873	0	48.2881	21.2524	16.0664	19.3144	0	0	30.2855	26.3756	25.7483	31.9437
CADAFLAG00001709	AFLA_023330	1	1	8	12	161	171	0	0	74	160	84	89		62.8868	80.5156	18.5627	13.6163	12.5551	15.5592	0	0	63.3474	57.9383	45.1868	56.9213
CADAFLAG00001710	AFLA_023340	9	2	231	1103	1132	1003	0	0	310	4847	723	616		204.284	58.1222	193.462	451.736	31.862	32.94	0	0	95.7835	633.506	140.379	142.199
CADAFLAG00001711	AFLA_023350	0	0	0	0	10	12	0	0	3	0	0	0		0	0	0	0	0.222943	0.312157	0	0	0.734207	0	0	0
CADAFLAG00001712	AFLA_023360	0	0	1	4	15	7	0	0	5	1	1	2		0	0	3.88404	7.59749	1.95803	1.06616	0	0	7.16473	0.606148	0.900461	2.14115
CADAFLAG00001713	AFLA_023370	0	0	0	0	1	0	0	0	0	0	0	0		0	0	0	0	0.132455	0	0	0	0	0	0	0
CADAFLAG00001714	AFLA_023380	0	0	29	16	514	506	0	0	49	80	34	36		0	0	27.8067	7.50235	16.5637	19.0258	0	0	17.3338	11.9712	7.55807	9.51454
CADAFLAG00001715	AFLA_023390	8	4	525	240	3688	3114	0	0	387	1527	637	530		455.745	291.751	1103.53	246.695	260.529	256.674	0	0	300.109	500.907	310.415	307.067
CADAFLAG00001716	AFLA_023400	0	0	80	11	79	71	0	0	8	29	20	14		0	0	83.5864	5.62037	2.77406	2.909	0	0	3.08377	4.72867	4.84459	4.03188
CADAFLAG00001717	AFLA_023410	0	0	76	2	14	6	0	0	2	5	4	2		0	0	112.842	1.45215	0.698597	0.349339	0	0	1.09555	1.15857	1.37688	0.818502
CADAFLAG00001718	AFLA_023420	0	0	12	25	225	184	0	0	14	68	36	20		0	0	10.2583	10.4511	6.46429	6.16813	0	0	4.41539	9.07192	7.13475	4.71259
CADAFLAG00001719	AFLA_023430	0	0	284	460	12739	10782	0	0	1191	1437	1056	1005		0	0	266.28	210.913	401.42	396.424	0	0	411.981	210.267	229.544	259.729
CADAFLAG00001720	AFLA_023440	0	0	84	208	5139	4440	0	0	419	623	473	384		0	0	89.6889	108.605	184.409	185.901	0	0	165.051	103.811	117.085	113.012
CADAFLAG00001721	AFLA_023450	0	1	51	98	5503	4711	0	0	279	410	288	213		0	39.2111	57.6301	54.1541	208.988	208.753	0	0	116.313	72.3033	75.4489	66.3427
CADAFLAG00001722	AFLA_023460	4	3	106	243	647	514	0	0	137	386	208	128		24.7687	23.784	24.2181	27.1499	4.96801	4.60509	0	0	11.5479	13.7631	11.0174	8.06081
CADAFLAG00001723	AFLA_023470	0	0	0	0	0	1	0	0	0	0	1	0		0	0	0	0	0	0.362389	0	0	0	0	2.14248	0
CADAFLAG00001724	AFLA_023480	4	1	201	536	4708	4055	0	0	480	1270	882	709		105.65	33.8166	195.883	255.441	154.198	154.964	0	0	172.579	193.152	199.274	190.45
CADAFLAG00001725	AFLA_023490	1	1	32	85	310	237	0	0	53	118	89	62		26.7202	34.2105	31.5486	40.9803	10.2715	9.1626	0	0	19.2776	18.1555	20.3424	16.8483
CADAFLAG00001726	AFLA_023500	16	6	418	1199	2185	2012	1	0	578	1713	890	722		622.024	298.648	599.591	841.054	105.335	113.174	911.196	0	305.881	383.47	295.971	285.463
CADAFLAG00001727	AFLA_023510	0	0	9	13	796	672	0	0	686	236	458	448		0	0	17.1672	12.1262	51.0285	50.265	0	0	482.755	70.2528	202.536	235.542
CADAFLAG00001728	AFLA_023520	0	2	25	29	2278	1955	0	0	164	217	252	214		0	97.6331	35.1705	19.9509	107.705	107.851	0	0	85.1192	47.6423	82.1901	82.9823
CADAFLAG00001729	AFLA_023530	0	0	5	11	124	103	0	0	9	12	15	16		0	0	7.85921	8.45527	6.55049	6.34872	0	0	5.21912	2.94364	5.46614	6.93206
CADAFLAG00001730	AFLA_023540	0	0	1	0	8	4	0	0	1	0	0	1		0	0	0.414859	0	0.111541	0.065073	0	0	0.153055	0	0	0.11435
CADAFLAG00001731	AFLA_023550	0	0	0	1	3	3	0	0	0	0	0	0		0	0	0	0.543804	0.112119	0.130821	0	0	0	0	0	0
CADAFLAG00001732	AFLA_023560	0	0	0	3	61	38	0	0	33	13	28	22		0	0	0	0.793482	1.10882	0.805959	0	0	6.5849	1.09731	3.51098	3.27979
CADAFLAG00001733	AFLA_023570	0	0	0	1	43	38	0	0	28	6	16	20		0	0	0	0.581183	1.71751	1.77097	0	0	12.2769	1.11284	4.40847	6.55165
CADAFLAG00001734	AFLA_023580	0	0	0	0	18	17	0	0	8	4	8	9		0	0	0	0	2.09193	2.30526	0	0	10.2063	2.15867	6.41361	8.57843
CADAFLAG00001735	AFLA_023590	1	0	69	91	1186	1025	1	0	85	216	117	81		37.9291	0	96.5636	62.2776	55.7817	56.2507	888.991	0	43.8863	47.1751	37.9604	31.2452
CADAFLAG00001736	AFLA_023600	42	20	1705	3956	17989	15935	0	0	5748	11358	8271	7577		3177.75	1937.41	4759.77	5400.63	1687.76	1744.43	0	0	5920.04	4948.33	5353.04	5830.33
CADAFLAG00001737	AFLA_023610	0	0	0	0	95	69	0	0	5	9	13	8		0	0	0	0	13.266	11.2425	0	0	7.66459	5.83594	12.5227	9.16215
CADAFLAG00001738	AFLA_023620	0	0	2	4	49	47	0	0	10	15	6	2		0	0	1.3922	1.36163	1.14633	1.28295	0	0	2.56814	1.62952	0.968288	0.383739
CADAFLAG00001739	AFLA_023630	0	0	0	0	3	1	0	0	0	0	0	0		0	0	0	0	0.607208	0.236164	0	0	0	0	0	0
CADAFLAG00001740	AFLA_023640	0	0	3	1	50	44	0	0	4	15	17	15		0	0	3.06285	0.499264	1.7156	1.76156	0	0	1.50664	2.38996	4.02377	4.22113
CADAFLAG00001741	AFLA_023650	0	0	4	5	24	24	0	0	4	6	10	2		0	0	8.5079	5.20066	1.7156	2.00177	0	0	3.13883	1.99163	4.9311	1.17254
CADAFLAG00001742	AFLA_023660	0	0	0	0	0	0	0	0	0	0	0	0		0	0	0	0	0	0	0	0	0	0	0	0
CADAFLAG00001743	AFLA_023670	0	0	0	1	8	2	0	0	1	2	0	1		0	0	0	0.67555	0.371419	0.108343	0	0	0.509656	0.431178	0	0.380772
CADAFLAG00001744	AFLA_023680	0	0	0	0	3	2	0	0	0	1	0	0		0	0	0	0	0.210006	0.163357	0	0	0	0.325059	0	0
CADAFLAG00001745	AFLA_023690	1	2	19	22	379	322	0	0	26	72	63	48		72.2729	185.066	50.6665	28.689	33.9664	33.6715	0	0	25.5791	29.9636	38.9483	35.2811
CADAFLAG00001746	AFLA_023700	0	0	0	0	11	7	0	0	3	1	3	4		0	0	0	0	0.690426	0.512648	0	0	2.06704	0.291458	1.29892	2.05909
CADAFLAG00001747	AFLA_023710	0	0	0	0	16	13	0	0	4	2	1	1		0	0	0	0	0.500384	0.474377	0	0	1.37324	0.290446	0.215735	0.256492
CADAFLAG00001748	AFLA_023720	0	0	5	9	63	51	0	0	13	23	13	18		0	0	31.1627	27.4305	13.1962	12.4645	0	0	29.8919	22.3711	18.784	30.9222
CADAFLAG00001749	AFLA_023730	0	0	1	1	28	32	0	0	2	6	1	6		0	0	1.61445	0.789498	1.51924	2.02589	0	0	1.19124	1.51172	0.374288	2.66999
CADAFLAG00001750	AFLA_023740	0	1	29	35	1695	1435	0	0	91	162	167	133		0	58.4878	48.8803	28.849	96.0171	94.8479	0	0	56.5878	42.6134	65.2579	61.7905
CADAFLAG00001751	AFLA_023750	0	0	0	0	4	0	0	0	1	0	1	0		0	0	0	0	0.33359	0	0	0	0.915493	0	0.575295	0
CADAFLAG00001752	AFLA_023760	0	0	4	4	71	64	0	0	8	8	12	6		0	0	2.87784	1.40732	1.71675	1.80562	0	0	2.12345	0.898238	2.00156	1.18985
CADAFLAG00001753	AFLA_023770	2	2	101	224	889	747	0	0	106	77	183	135		47.1651	60.3867	87.8828	95.314	25.9972	25.4884	0	0	34.0278	10.4561	36.916	32.378
CADAFLAG00001754	AFLA_023780	3	1	102	266	835	712	0	0	101	142	166	173		122.074	52.0984	153.142	195.3	42.1332	41.9194	0	0	55.9451	33.2719	57.7808	71.5937
CADAFLAG00001755	AFLA_023790	0	0	0	0	0	0	0	0	0	0	0	0		0	0	0	0	0	0	0	0	0	0	0	0
CADAFLAG00001756	AFLA_023800	0	0	0	0	0	0	0	0	0	0	0	0		0	0	0	0	0	0	0	0	0	0	0	0
CADAFLAG00001757	AFLA_023810	0	0	0	2	17	12	0	0	1	5	1	2		0	0	0	1.80147	1.05235	0.866745	0	0	0.679541	1.43726	0.427023	1.01539
CADAFLAG00001758	AFLA_023820	0	0	0	1	37	34	0	0	14	14	11	14		0	0	0	0.842808	2.14312	2.29785	0	0	8.90177	3.76553	4.39518	6.65066
CADAFLAG00001759	AFLA_023830	0	0	0	0	3	2	0	0	0	0	0	0		0	0	0	0	0.232938	0.181195	0	0	0	0	0	0
CADAFLAG00001760	AFLA_023840	0	0	3	2	141	147	0	0	4	39	10	16		0	0	5.32448	1.73585	8.41043	10.2309	0	0	2.61916	10.8023	4.11469	7.82726
CADAFLAG00001761	AFLA_023850	0	0	8	5	26	35	0	0	3	12	5	5		0	0	19.6696	6.01178	2.14844	3.37454	0	0	2.72128	4.6045	2.85008	3.38852
CADAFLAG00001762	AFLA_023860	0	0	0	0	3	2	0	0	0	0	0	1		0	0	0	0	0.146058	0.113614	0	0	0	0	0	0.399296
CADAFLAG00001763	AFLA_023870	0	0	21	20	200	182	0	0	23	31	22	14		0	0	27.9304	13.0081	8.93987	9.49226	0	0	11.2858	6.4345	6.78362	5.13239
CADAFLAG00001764	AFLA_023880	0	0	44	9	53	41	0	0	38	16	17	6		0	0	37.1986	3.72085	1.50589	1.35924	0	0	11.8523	2.111	3.33199	1.39817
CADAFLAG00001765	AFLA_023890	0	0	19	10	33	31	0	0	20	6	8	2		0	0	24.8389	6.39301	1.44989	1.58921	0	0	9.64617	1.22412	2.42466	0.720681
CADAFLAG00001766	AFLA_023900	0	0	31	5	122	93	0	0	39	28	16	18		0	0	113.034	8.91542	14.9503	13.2975	0	0	52.4634	15.933	13.5253	18.0906
CADAFLAG00001767	AFLA_023910	0	0	1	1	7	3	0	0	1	0	1	0		0	0	3.28833	1.60806	0.7736	0.386845	0	0	1.21317	0	0.762354	0
CADAFLAG00001768	AFLA_023920	0	0	0	0	0	0	0	0	0	0	0	0		0	0	0	0	0	0	0	0	0	0	0	0
CADAFLAG00001769	AFLA_023930	0	0	2	5	26	16	0	0	2	7	3	2		0	0	4.76443	5.82474	2.0816	1.49465	0	0	1.75775	2.6024	1.65685	1.31324
CADAFLAG00001770	AFLA_023940	0	0	1	1	9	13	0	0	1	1	1	1		0	0	4.22046	2.06389	1.27657	2.15151	0	0	1.55706	0.658649	0.978454	1.1633
CADAFLAG00001771	AFLA_023950	0	0	16	11	117	103	0	0	11	40	11	15		0	0	31.9999	10.7584	7.86425	8.07803	0	0	8.11646	12.4848	5.10037	8.26901
CADAFLAG00001772	AFLA_023960	0	0	0	0	3	4	0	0	0	0	0	0		0	0	0	0	0.174327	0.271207	0	0	0	0	0	0
CADAFLAG00001773	AFLA_023970	0	0	0	3	93	89	0	0	1	4	8	6		0	0	0	1.00942	2.15056	2.40135	0	0	0.253847	0.429517	1.27613	1.13792
CADAFLAG00001774	AFLA_023980	0	0	0	0	41	46	0	0	3	1	1	2		0	0	0	0	1.63762	2.1438	0	0	1.31539	0.185473	0.275529	0.655165
CADAFLAG00001775	AFLA_023990	0	0	2	3	11	6	1	0	5	9	4	5		0	0	16.7499	12.2866	3.09613	1.97049	5320.05	0	15.4489	11.7631	7.76648	11.5422
CADAFLAG00001776	AFLA_024000	0	1	33	9	303	282	0	0	152	51	54	50		0	38.2698	36.3949	4.85395	11.2308	12.196	0	0	61.8466	8.77792	13.8071	15.1995
CADAFLAG00001777	AFLA_024010	0	0	0	1	5	10	0	0	2	2	2	3		0	0	0	1.64851	0.566473	1.32192	0	0	2.48738	1.05218	1.56306	2.78754
CADAFLAG00001778	AFLA_024020	0	0	2	1	32	31	0	0	6	6	3	0		0	0	2.81364	0.687962	1.51297	1.71017	0	0	3.11412	1.3173	0.978454	0
CADAFLAG00001779	AFLA_024030	2	0	31	28	451	416	0	0	63	100	54	66		120.555	0	68.9458	30.453	33.7105	36.281	0	0	51.6931	34.7089	27.8433	40.4598
CADAFLAG00001780	AFLA_024040	0	0	6	9	304	244	0	0	30	19	12	13		0	0	4.03006	2.95617	6.86241	6.42673	0	0	7.43408	1.99163	1.86863	2.40679
CADAFLAG00001781	AFLA_024050	0	0	62	97	2753	2574	0	0	256	348	446	380		0	0	73.1979	56.0022	109.234	119.167	0	0	111.505	64.1182	122.074	123.659
CADAFLAG00001782	AFLA_024060	0	1	36	76	1111	860	0	0	94	394	219	181		0	40.4329	41.9477	43.3057	43.5073	39.2956	0	0	40.4091	71.6467	59.1603	58.1323
CADAFLAG00001783	AFLA_024070	1	3	104	299	2784	2384	0	2	229	947	251	220		25.9408	99.6381	99.5425	139.95	89.5545	89.479	0	667.682	80.8642	141.456	55.6967	58.0406
CADAFLAG00001784	AFLA_024080	0	5	107	200	2861	2292	0	0	275	816	323	273		0	177.812	109.659	100.235	98.5422	92.112	0	0	103.978	130.511	76.7441	77.1184
CADAFLAG00001785	AFLA_024090	0	0	35	111	1447	1177	0	0	174	343	163	133		0	0	34.4219	53.3846	47.8276	45.3924	0	0	63.1337	52.6448	37.1651	36.0539
CADAFLAG00001786	AFLA_024100	1	0	53	119	2742	2368	0	0	180	553	231	188		47.629	0	93.1406	102.267	161.947	163.187	0	0	116.703	151.664	94.1144	91.0657
CADAFLAG00001787	AFLA_024110	0	0	5	2	20	27	0	0	2	4	4	3		0	0	7.18496	1.40543	0.965889	1.52145	0	0	1.0603	0.897034	1.33259	1.18825
CADAFLAG00001788	AFLA_024120	0	0	0	0	0	0	0	0	0	0	0	0		0	0	0	0	0	0	0	0	0	0	0	0
CADAFLAG00001789	AFLA_024130	0	0	0	0	0	0	0	0	0	0	0	0		0	0	0	0	0	0	0	0	0	0	0	0
CADAFLAG00001790	AFLA_024140	1	1	8	32	298	256	0	0	21	74	30	24		29.7682	38.1129	8.78685	17.1878	11.0003	11.0261	0	0	8.50958	12.6844	7.63916	7.26588
CADAFLAG00001791	AFLA_024150	0	0	1	1	11	10	0	0	1	1	0	0		0	0	0.776809	0.379875	0.287177	0.304617	0	0	0.286589	0.12123	0	0
CADAFLAG00001792	AFLA_024160	0	0	2	2	46	43	0	0	6	13	2	3		0	0	0.843427	0.412452	0.651956	0.711092	0	0	0.9335	0.85557	0.195537	0.348717
CADAFLAG00001793	AFLA_024170	0	0	0	0	0	1	0	0	0	0	0	0		0	0	0	0	0	0.0339557	0	0	0	0	0	0
CADAFLAG00001794	AFLA_024180	0	0	1	8	215	226	0	0	18	36	25	25		0	0	1.53581	6.00833	11.0973	13.6109	0	0	10.199	8.62849	8.90141	10.5831
CADAFLAG00001795	AFLA_024190	0	0	0	0	77	70	0	0	2	1	3	6		0	0	0	0	2.43345	2.58123	0	0	0.693847	0.146752	0.654019	1.55515
CADAFLAG00001796	AFLA_024200	0	0	0	0	0	0	0	0	0	0	0	2		0	0	0	0	0	0	0	0	0	0	0	0.587434
CADAFLAG00001797	AFLA_024210	0	0	0	0	22	16	0	0	4	2	3	1		0	0	0	0	0.792609	0.672594	0	0	1.58197	0.334594	0.745582	0.295479
CADAFLAG00001798	AFLA_024220	0	0	0	0	1	0	0	0	0	0	0	0		0	0	0	0	0.176606	0	0	0	0	0	0	0
CADAFLAG00001799	AFLA_024230	1	2	37	52	1357	1219	0	1	123	307	137	115		34.3425	87.9391	46.884	32.222	57.7891	60.5712	0	441.964	57.5007	60.7094	40.2461	40.1656
CADAFLAG00001800	AFLA_024240	2	1	55	106	2329	2160	0	0	153	400	234	191		61.3379	39.2663	62.2376	58.6573	88.5733	95.8482	0	0	63.8745	70.6391	61.3885	59.5741
CADAFLAG00001801	AFLA_024250	0	0	19	27	1007	848	1	0	51	112	98	51		0	0	18.55	12.8908	33.0418	32.4658	620.189	0	18.3699	17.0649	22.1819	13.7244
CADAFLAG00001802	AFLA_024260	0	0	31	17	150	131	0	0	22	33	22	27		0	0	20.4127	5.47411	3.3195	3.38259	0	0	5.3445	3.39115	3.35848	4.90045
CADAFLAG00001803	AFLA_024270	0	0	3	4	66	69	0	0	1	11	8	6		0	0	2.62315	1.71037	1.9395	2.36587	0	0	0.322588	1.50103	1.62171	1.44606
CADAFLAG00001804	AFLA_024280	0	0	3	7	184	163	0	0	41	28	25	21		0	0	3.14676	3.5906	6.48639	6.70455	0	0	15.8662	4.58348	6.07943	6.07149
CADAFLAG00001805	AFLA_024290	0	1	7	3	308	232	0	0	17	34	27	17		0	50.8173	10.2513	2.14847	15.1592	13.3232	0	0	9.18495	7.77062	9.16699	6.86222
CADAFLAG00001806	AFLA_024300	0	0	4	2	47	36	0	0	8	7	4	5		0	0	3.32918	0.814017	1.31467	1.17495	0	0	2.45648	0.909222	0.771824	1.14705
CADAFLAG00001807	AFLA_024310	0	0	0	1	3	2	0	0	0	0	0	1		0	0	0	4.16053	0.857802	0.667256	0	0	0	0	0	2.34507
CADAFLAG00001808	AFLA_024320	0	0	0	0	0	1	0	0	0	0	0	0		0	0	0	0	0	0.151213	0	0	0	0	0	0
CADAFLAG00001809	AFLA_024330	0	0	0	0	0	0	0	0	0	0	0	0		0	0	0	0	0	0	0	0	0	0	0	0
CADAFLAG00001810	AFLA_024340	0	0	0	0	0	3	0	0	0	0	0	0		0	0	0	0	0	0.275352	0	0	0	0	0	0
CADAFLAG00001811	AFLA_024350	0	0	0	1	26	27	0	0	0	2	4	1		0	0	0	0.932788	1.66676	2.01958	0	0	0	0.595363	1.76888	0.525764
CADAFLAG00001812	AFLA_024360	2	0	19	40	556	507	0	0	46	74	57	44		70.8627	0	24.8389	25.572	24.4285	25.9913	0	0	22.1862	15.0975	17.2757	15.855
CADAFLAG00001813	AFLA_024370	0	0	6	10	111	74	0	0	6	19	7	9		0	0	7.0526	5.7481	4.38495	3.41091	0	0	2.60193	3.48535	1.90756	2.91591
CADAFLAG00001814	AFLA_024380	0	3	28	45	482	447	0	1	38	139	69	60		0	88.708	23.86	18.7522	13.8039	14.9369	0	297.219	11.9465	18.4851	13.6315	14.0928
CADAFLAG00001815	AFLA_024390	0	0	0	1	0	1	0	0	0	0	0	0		0	0	0	0.816553	0	0.0654784	0	0	0	0	0	0
CADAFLAG00001816	AFLA_024400	0	0	0	0	0	0	0	0	0	0	0	0		0	0	0	0	0	0	0	0	0	0	0	0
CADAFLAG00001817	AFLA_024410	0	0	0	0	0	0	0	0	0	0	0	0		0	0	0	0	0	0	0	0	0	0	0	0
CADAFLAG00001818	AFLA_024420	0	0	0	0	0	0	0	0	0	0	0	0		0	0	0	0	0	0	0	0	0	0	0	0
CADAFLAG00001819	AFLA_024430	0	0	0	0	0	0	0	0	0	0	0	0		0	0	0	0	0	0	0	0	0	0	0	0
CADAFLAG00001820	AFLA_024440	0	0	0	0	0	0	0	0	0	0	0	0		0	0	0	0	0	0	0	0	0	0	0	0
CADAFLAG00001821	AFLA_024450	0	0	0	4	91	93	0	1	9	27	9	17		0	0	0	2.6146	4.08793	4.87463	0	466.212	4.4382	5.63219	2.78896	6.26327
CADAFLAG00001822	AFLA_024460	0	0	12	17	312	297	0	0	27	84	46	32		0	0	13.4842	9.34157	11.7826	13.087	0	0	11.1932	14.7305	11.9835	9.91125
CADAFLAG00001823	AFLA_024470	0	0	3	26	354	293	0	0	23	62	47	33		0	0	2.51642	10.665	9.97949	9.63762	0	0	7.11764	8.11613	9.13989	7.62974
CADAFLAG00001824	AFLA_024480	6	5	102	157	4397	3570	0	2	529	1086	1210	870		110.751	118.165	69.4686	52.2895	100.644	95.3447	0	475.097	132.92	115.428	191.053	163.321
CADAFLAG00001825	AFLA_024490	1	1	14	40	736	575	0	1	78	172	131	100		36.4996	46.7314	18.8542	26.3431	33.312	30.366	0	469.726	38.7543	36.1496	40.9008	37.1205
CADAFLAG00001826	AFLA_024500	0	0	0	1	66	51	0	0	6	6	3	0		0	0	0	1.23638	5.60808	5.05635	0	0	5.5966	2.36741	1.75845	0
CADAFLAG00001827	AFLA_024510	0	0	103	330	9311	7937	0	0	445	716	414	366		0	0	99.1163	155.292	301.125	299.505	0	0	157.984	107.527	92.3611	97.0784
CADAFLAG00001828	AFLA_024520	0	0	8	10	273	258	0	0	17	26	23	14		0	0	8.40781	5.13948	9.6427	10.6329	0	0	6.59155	4.26443	5.60405	4.0556
CADAFLAG00001829	AFLA_024530	0	0	0	0	3	2	0	0	1	0	0	0		0	0	0	0	0.039678	0.0308643	0	0	0.145188	0	0	0
CADAFLAG00001830	AFLA_024540	0	0	0	0	13	11	0	0	2	3	1	2		0	0	0	0	0.437719	0.432157	0	0	0.739239	0.469057	0.232268	0.552298
CADAFLAG00001831	AFLA_024550	0	0	0	0	1	0	0	0	0	1	0	1		0	0	0	0	0.0684937	0	0	0	0	0.318055	0	0.561748
CADAFLAG00001832	AFLA_024560	0	0	1	1	5	11	0	0	1	4	3	2		0	0	1.00751	0.492694	0.169303	0.434594	0	0	0.371704	0.628936	0.700735	0.555412
CADAFLAG00001833	AFLA_024570	0	0	0	1	42	47	0	0	1	3	3	1		0	0	0	1.14962	3.31834	4.33277	0	0	0.867309	1.10064	1.63505	0.647981
CADAFLAG00001834	AFLA_024580	0	0	7	6	96	97	0	0	12	22	17	6		0	0	12.2215	5.12274	5.63299	6.64105	0	0	7.7295	5.99435	6.88105	2.88742
CADAFLAG00001835	AFLA_024590	0	1	37	64	583	489	0	0	81	253	123	103		0	39.0738	41.6637	35.2421	22.0632	21.5926	0	0	33.6501	44.4602	32.1101	31.9689
CADAFLAG00001836	AFLA_024600	0	0	3	3	210	235	0	0	28	43	48	37		0	0	6.28123	3.07164	14.777	19.2944	0	0	21.6285	14.0503	23.2994	21.353
CADAFLAG00001837	AFLA_024610	1	0	1	1	335	295	0	0	240	138	316	334		43.6242	0	1.6096	0.787127	18.122	18.6201	0	0	142.52	34.6651	117.92	148.183
CADAFLAG00001838	AFLA_024620	0	0	1	7	75	72	0	0	4	5	6	3		0	0	1.43699	4.91902	3.62208	4.0572	0	0	2.12061	1.12129	1.99888	1.18825
CADAFLAG00001839	AFLA_024630	0	0	43	112	2271	1923	0	0	167	279	134	109		0	0	52.3816	66.7198	92.9759	91.8607	0	0	75.0538	53.0407	37.8439	36.5991
CADAFLAG00001840	AFLA_024640	0	0	3	5	46	38	0	0	6	12	4	5		0	0	4.82881	3.93564	2.4884	2.39852	0	0	3.563	3.01436	1.49266	2.21831
CADAFLAG00001841	AFLA_024650	0	0	1	0	14	12	0	0	1	3	1	0		0	0	1.59999	0	0.752817	0.752904	0	0	0.590288	0.749091	0.370936	0
CADAFLAG00001842	AFLA_024660	0	0	0	0	1	1	0	0	0	0	0	0		0	0	0	0	0.114738	0.133876	0	0	0	0	0	0
CADAFLAG00001843	AFLA_024670	0	0	0	0	0	0	0	0	0	0	0	0		0	0	0	0	0	0	0	0	0	0	0	0
CADAFLAG00001844	AFLA_024680	0	0	0	0	0	0	0	0	0	0	0	0		0	0	0	0	0	0	0	0	0	0	0	0
CADAFLAG00001845	AFLA_024690	0	0	7	10	214	198	0	0	47	59	27	26		0	0	10.72	7.48896	11.0142	11.8905	0	0	26.5545	14.1007	9.58605	10.9749
CADAFLAG00001846	AFLA_024700	0	0	2	2	115	79	0	0	37	29	13	3		0	0	4.32256	2.11382	8.35319	6.69543	0	0	29.5025	9.78147	6.51382	1.78717
CADAFLAG00001847	AFLA_024710	0	0	1	1	135	125	0	0	109	15	79	70		0	0	4.35771	2.131	19.7713	21.3603	0	0	175.239	10.201	79.8116	84.0794
CADAFLAG00001848	AFLA_024720	0	0	6	8	82	71	0	0	12	16	12	14		0	0	5.68866	3.70915	2.61286	2.63971	0	0	4.19745	2.36741	2.63767	3.65865
CADAFLAG00001849	AFLA_024730	0	1	0	2	5	10	0	0	5	6	0	7		0	66.4254	0	1.87224	0.321676	0.750663	0	0	3.53119	1.79247	0	3.69349
CADAFLAG00001850	AFLA_024740	0	1	3	9	269	241	0	0	17	23	27	21		0	27.4323	2.37167	3.47938	7.14708	7.4712	0	0	4.95825	2.83763	4.94855	4.57601
CADAFLAG00001851	AFLA_024750	0	0	8	10	187	138	0	0	26	65	46	25		0	0	8.29397	5.06989	6.51564	5.61037	0	0	9.9447	10.5167	11.0563	7.14408
CADAFLAG00001852	AFLA_024760	2	1	104	379	205	165	0	0	74	579	285	198		88.3092	56.5323	169.434	301.948	11.2244	10.5412	0	0	44.4779	147.211	107.645	88.9132
CADAFLAG00001853	AFLA_024770	0	0	9	30	18	13	0	0	6	46	24	16		0	0	15.2658	24.8842	1.0261	0.864688	0	0	3.75468	12.1767	9.43774	7.48049
CADAFLAG00001854	AFLA_024780	0	1	46	196	110	84	0	0	40	267	126	103		0	55.8532	74.0418	154.277	5.95052	5.30198	0	0	23.7533	67.0695	47.0187	45.6972
CADAFLAG00001855	AFLA_024790	0	0	43	94	552	447	0	0	63	254	127	98		0	0	44.7532	47.8421	19.308	18.2433	0	0	24.1903	41.2557	30.6437	28.1136
CADAFLAG00001856	AFLA_024800	0	0	13	9	105	102	0	0	11	22	20	18		0	0	34.325	11.6208	9.3175	10.5611	0	0	10.7153	9.06535	12.2427	13.1001
CADAFLAG00001857	AFLA_024810	0	1	3	3	222	177	0	0	91	12	113	106		0	33.3317	2.88171	1.40921	7.16679	6.66718	0	0	32.249	1.79889	25.1645	28.0652
CADAFLAG00001858	AFLA_024820	0	0	2	0	15	8	0	0	1	1	1	4		0	0	20.2263	0	5.09825	3.17261	0	0	3.73107	1.57827	2.3446	11.1502
CADAFLAG00001859	AFLA_024830	0	0	8	24	484	362	0	0	34	87	55	32		0	0	6.36199	9.33342	12.9358	11.2889	0	0	9.97534	10.7974	10.1402	7.01434
CADAFLAG00001860	AFLA_024840	1	1	17	18	383	253	0	0	26	54	47	27		10.9142	13.9738	6.84595	3.54473	5.18355	3.99526	0	0	3.86282	3.3937	4.38797	2.99697
CADAFLAG00001861	AFLA_024850	1	1	12	36	666	496	0	0	30	73	78	36		38.7383	49.5976	17.1519	25.1629	31.9926	27.8006	0	0	15.8197	16.2836	25.8468	14.183
CADAFLAG00001862	AFLA_024860	4	2	106	121	4689	3734	0	0	283	409	503	383		45.7179	29.2669	44.7016	24.9534	66.457	61.7493	0	0	44.0301	26.9176	49.1775	44.5195
CADAFLAG00001863	AFLA_024870	3	2	27	87	856	714	0	0	50	122	53	56		57.9529	49.4657	19.2446	30.3243	20.5051	19.9565	0	0	13.148	13.5706	8.75794	11.0019
CADAFLAG00001864	AFLA_024880	1	2	50	86	1422	1187	0	0	126	245	213	212		62.6158	160.337	115.517	97.1627	110.412	107.539	0	0	107.397	88.3357	114.087	135.003
CADAFLAG00001865	AFLA_024890	2	3	53	115	1342	1099	0	0	97	307	140	126		34.7533	66.7432	33.9807	36.0563	28.9169	27.6309	0	0	22.9443	30.7178	20.8097	22.267
CADAFLAG00001866	AFLA_024900	1	0	5	6	307	250	0	0	20	33	31	31		39.2618	0	7.24321	4.25049	14.9466	14.2017	0	0	10.689	7.46054	10.4113	12.3782
CADAFLAG00001867	AFLA_024910	0	0	4	11	175	182	0	0	15	16	20	14		0	0	5.67194	7.62764	8.33974	10.1201	0	0	7.84708	3.54068	6.5748	5.47184
CADAFLAG00001868	AFLA_024920	2	3	28	72	1769	1556	0	0	157	251	106	111		31.1512	59.8256	16.0914	20.2346	34.1671	35.066	0	0	33.2876	22.5115	14.1229	17.583
CADAFLAG00001869	AFLA_024930	1	2	182	303	2198	1953	0	0	185	566	356	271		15.9636	40.8772	107.2	87.2751	43.5103	45.1091	0	0	40.2012	52.0275	48.613	43.9972
CADAFLAG00001870	AFLA_024940	0	1	11	29	302	271	0	0	22	46	25	25		0	32.1228	10.183	13.1283	9.39582	9.83771	0	0	7.51368	6.64565	5.36544	6.37908
CADAFLAG00001871	AFLA_024950	5	2	52	132	1780	1551	0	0	146	448	294	245		384.308	196.816	147.47	183.063	169.654	172.486	0	0	152.757	198.278	193.299	191.514
CADAFLAG00001872	AFLA_024960	1	0	14	22	356	354	0	0	33	68	45	40		63.4361	0	32.7684	25.1812	28.004	32.4916	0	0	28.4962	24.8388	24.4186	25.806
CADAFLAG00001873	AFLA_024970	1	0	110	233	4668	4189	0	0	426	906	455	324		30.5186	0	123.865	128.303	176.657	184.972	0	0	176.975	159.213	118.781	100.562
CADAFLAG00001874	AFLA_024980	0	0	0	0	38	26	0	0	6	0	1	1		0	0	0	0	1.15046	0.918458	0	0	1.99408	0	0.208846	0.248302
CADAFLAG00001875	AFLA_024990	0	0	0	2	26	16	0	0	3	7	6	1		0	0	0	1.87224	1.67271	1.20106	0	0	2.11871	2.09121	2.66279	0.527641
CADAFLAG00001876	AFLA_025000	0	0	14	15	251	204	0	0	33	40	30	32		0	0	32.0682	16.8021	19.3225	18.3239	0	0	27.8873	14.2989	15.9312	20.2037
CADAFLAG00001877	AFLA_025010	0	0	4	2	78	61	0	0	10	7	6	8		0	0	6.5969	1.61301	4.32332	3.94502	0	0	6.08451	1.80166	2.2941	3.63667
CADAFLAG00001878	AFLA_025020	1	2	9	49	551	461	0	0	43	97	67	60		26.606	68.1286	8.83513	23.523	18.1788	17.7464	0	0	15.5734	14.8606	15.2485	16.2351
CADAFLAG00001879	AFLA_025030	3	2	28	61	1090	907	0	0	117	199	161	127		55.2352	47.146	19.0215	20.2648	24.886	24.162	0	0	29.3236	21.0976	25.3567	23.7806
CADAFLAG00001880	AFLA_025040	0	0	10	28	1323	1154	0	0	84	102	125	121		0	0	16.8553	23.0792	74.9443	76.2749	0	0	52.2349	26.8306	48.8458	56.2154
CADAFLAG00001881	AFLA_025050	0	0	0	0	29	22	0	0	2	0	5	2		0	0	0	0	5.02309	4.44624	0	0	3.80282	0	5.97421	2.84115
CADAFLAG00001882	AFLA_025060	0	0	15	21	1124	979	0	0	61	133	145	118		0	0	39.2194	26.8506	98.7685	100.376	0	0	58.8416	54.2695	87.8938	85.0404
CADAFLAG00001883	AFLA_025070	4	1	79	127	1860	1484	0	0	138	308	200	151		95.8869	30.6916	69.8743	54.9314	55.29	51.4712	0	0	45.0314	42.5144	41.0111	36.813
CADAFLAG00001884	AFLA_025080	3	3	74	185	2022	1739	1	1	189	486	279	235		313.529	401.42	285.351	348.856	262.043	262.959	2449.52	1344.97	268.878	292.469	249.421	249.776
CADAFLAG00001885	AFLA_025090	6	5	187	361	4077	3707	0	2	447	802	544	499		294.132	313.821	338.239	319.313	247.837	262.933	0	1261.76	298.288	226.387	228.12	248.781
CADAFLAG00001886	AFLA_025100	51	43	1998	3219	55700	51221	1	6	6683	19847	11805	10074		1722.95	1859.91	2490.52	1962.19	2333.42	2503.7	791.822	2608.62	3073.35	3860.86	3411.47	3461.23
CADAFLAG00001887	AFLA_025110	0	0	13	12	348	311	0	0	25	55	40	21		0	0	32.1105	14.4948	28.8885	30.1234	0	0	22.7819	21.2012	22.9057	14.2974
CADAFLAG00001888	AFLA_025120	1	2	29	45	1213	1090	0	0	105	201	128	98		29.7073	76.07	31.7872	24.1209	44.6846	46.8512	0	0	42.4609	34.3831	32.5271	29.6083
CADAFLAG00001889	AFLA_025130	0	0	218	342	1714	1443	0	0	406	502	132	125		0	0	753.855	578.341	199.198	195.676	0	0	517.968	270.913	105.825	119.145
CADAFLAG00001890	AFLA_025140	1	2	77	121	1421	1165	0	0	183	421	263	186		53.2119	136.257	151.179	116.175	93.7643	89.6946	0	0	132.555	128.996	119.712	100.658
CADAFLAG00001891	AFLA_025150	1	0	16	26	289	229	1	0	21	73	28	28		42.2292	0	24.9301	19.8109	15.1337	13.992	989.778	0	12.0717	17.751	10.1145	12.0253
CADAFLAG00001892	AFLA_025160	0	0	17	32	648	504	0	0	71	210	129	109		0	0	23.01	21.1809	29.4772	26.7509	0	0	35.4545	44.359	40.4798	40.6657
CADAFLAG00001893	AFLA_025170	4	4	32	96	1370	1137	0	0	124	277	202	164		48.912	62.6233	14.4377	21.1809	20.7735	20.1163	0	0	20.6402	19.5039	21.129	20.395
CADAFLAG00001894	AFLA_025180	1	1	41	114	1121	1049	0	0	79	296	127	124		52.6336	67.3881	79.6229	108.264	73.1649	79.8858	0	0	56.6013	89.7099	57.1793	66.3758
CADAFLAG00001895	AFLA_025190	8	0	19	35	40	45	0	0	23	95	75	65		337.181	0	29.5473	26.6169	2.09058	2.7442	0	0	13.1958	23.0559	27.04	27.8619
CADAFLAG00001896	AFLA_025200	0	0	4	9	148	139	0	0	11	23	14	10		0	0	9.61431	10.5786	11.9554	13.1013	0	0	9.75431	8.62742	7.8013	6.62509
CADAFLAG00001897	AFLA_025210	5	1	116	266	2426	2159	0	0	204	700	359	307		336.27	86.107	287.851	322.788	202.322	210.088	0	0	186.761	271.083	206.531	209.982
CADAFLAG00001898	AFLA_025220	0	0	0	0	0	0	0	0	0	0	0	0		0	0	0	0	0	0	0	0	0	0	0	0
CADAFLAG00001899	AFLA_025230	0	0	0	0	0	0	0	0	0	0	0	0		0	0	0	0	0	0	0	0	0	0	0	0
CADAFLAG00001900	AFLA_025240	0	0	0	3	98	69	0	0	9	22	14	14		0	0	0	0.93058	2.08918	1.71631	0	0	2.10618	2.17783	2.05881	2.44776
CADAFLAG00001901	AFLA_025250	0	0	0	1	94	76	0	0	147	29	90	93		0	0	0	1.2912	8.34138	7.86902	0	0	143.196	11.9498	55.0922	67.6837
CADAFLAG00001902	AFLA_025260	0	0	2	6	58	49	0	0	11	11	6	1		0	0	5.89009	8.6411	5.74067	5.65884	0	0	11.9517	5.05568	4.0966	0.811756
CADAFLAG00001903	AFLA_025270	0	0	5	6	527	477	0	0	28	43	53	39		0	0	5.66195	3.32256	20.0562	21.1814	0	0	11.6977	7.59905	13.914	12.1729
CADAFLAG00001904	AFLA_025280	0	0	0	1	24	27	0	0	4	2	5	1		0	0	0	1.74742	2.88221	3.78334	0	0	5.27324	1.11531	4.14212	0.984931
CADAFLAG00001905	AFLA_025290	1	4	62	98	2988	2430	0	1	166	437	289	179		26.5089	135.76	60.6421	46.8743	98.2214	93.2028	0	341.151	59.9013	66.7051	65.5332	48.258
CADAFLAG00001906	AFLA_025300	0	1	2	7	73	62	0	0	7	18	12	14		0	41.9845	2.41986	4.14175	2.96842	2.94165	0	0	3.12466	3.39881	3.36606	4.66897
CADAFLAG00001907	AFLA_025310	0	0	0	1	10	6	0	0	1	0	1	0		0	0	0	1.33731	0.919073	0.643425	0	0	1.00891	0	0.633998	0
CADAFLAG00001908	AFLA_025320	0	0	0	0	0	0	0	0	0	0	0	0		0	0	0	0	0	0	0	0	0	0	0	0
CADAFLAG00001909	AFLA_025330	7	21	295	365	27114	23826	0	3	922	3154	2259	2063		996.941	3829.23	1550.19	937.955	4788.5	4909.69	0	5498.55	1787.47	2586.54	2752.07	2988.11
CADAFLAG00001910	AFLA_025340	0	0	0	0	13	6	0	0	0	0	1	0		0	0	0	0	0.415212	0.223602	0	0	0	0	0.220326	0
CADAFLAG00001911	AFLA_025350	0	0	0	1	21	25	0	0	4	2	1	1		0	0	0	2.40471	3.47056	4.82077	0	0	7.25675	1.53483	1.14003	1.35541
CADAFLAG00001912	AFLA_025360	0	0	1	4	37	37	0	0	2	8	3	4		0	0	1.21818	2.38285	1.5148	1.76747	0	0	0.898848	1.52088	0.847252	1.34309
CADAFLAG00001913	AFLA_025370	0	0	1	10	115	127	0	0	3	18	13	7		0	0	1.51555	7.41131	5.85747	7.54767	0	0	1.6774	4.25732	4.56765	2.92416
CADAFLAG00001914	AFLA_025380	1	0	4	7	155	123	0	0	15	28	23	22		45.3964	0	6.69997	5.73373	8.72545	8.07901	0	0	9.26937	7.31924	8.93145	10.1571
CADAFLAG00001915	AFLA_025390	0	0	3	3	97	87	0	0	6	8	5	8		0	0	4.51684	2.20882	4.90826	5.13656	0	0	3.33281	1.87974	1.74528	3.31999
CADAFLAG00001916	AFLA_025400	0	0	23	40	690	617	0	0	23	199	95	79		0	0	28.7365	24.4395	28.9733	30.2295	0	0	10.6018	38.802	27.5176	27.2061
CADAFLAG00001917	AFLA_025410	0	5	38	56	638	547	0	0	48	190	132	120		0	161.731	35.4225	25.5276	19.9875	19.9951	0	0	16.5075	27.6404	28.5266	30.8326
CADAFLAG00001918	AFLA_025420	0	0	25	58	280	230	0	0	32	137	59	45		0	0	42.675	48.4159	16.0633	15.3958	0	0	20.1525	36.4963	23.3489	21.1729
CADAFLAG00001919	AFLA_025430	0	1	21	54	469	368	0	0	37	108	62	52		0	21.7026	13.1341	16.5159	9.85821	9.02548	0	0	8.53748	10.5415	8.9899	8.96436
CADAFLAG00001920	AFLA_025440	1	0	13	13	306	256	0	0	30	51	51	50		21.8778	0	10.4939	5.13174	8.30156	8.10354	0	0	8.93433	6.42481	9.54435	11.125
CADAFLAG00001921	AFLA_025450	0	0	8	6	46	27	0	0	6	9	12	3		0	0	14.6849	5.38589	2.8378	1.9435	0	0	4.06328	2.57821	5.10672	1.51787
CADAFLAG00001922	AFLA_025460	1	0	2	1	7	12	0	0	4	6	7	3		55.026	0	4.06059	0.992854	0.47764	0.955389	0	0	2.99616	1.9011	3.29487	1.67886
CADAFLAG00001923	AFLA_025470	0	0	1	1	19	19	0	0	1	2	1	3		0	0	0.71946	0.35183	0.459413	0.536044	0	0	0.265432	0.22456	0.166797	0.594925
CADAFLAG00001924	AFLA_025480	0	0	0	0	1	0	0	0	0	0	0	0		0	0	0	0	0.0662273	0	0	0	0	0	0	0
CADAFLAG00001925	AFLA_025490	0	0	0	0	0	2	0	0	0	0	0	0		0	0	0	0	0	0.306096	0	0	0	0	0	0
CADAFLAG00001926	AFLA_025500	2	1	17	40	226	239	0	0	30	96	60	37		176.083	112.722	55.224	63.5427	24.6735	30.4451	0	0	35.9539	48.6682	45.1868	33.1295
CADAFLAG00001927	AFLA_025510	0	0	6	28	1199	1050	0	0	369	321	215	160		0	0	3.45434	7.88311	23.1993	23.7051	0	0	78.3764	28.8412	28.6968	25.3903
CADAFLAG00001928	AFLA_025520	0	2	4	7	2397	2131	0	0	2238	589	1605	1388		0	299.986	17.2903	14.7967	348.219	361.214	0	0	3569.01	397.33	1608.41	1653.73
CADAFLAG00001929	AFLA_025530	0	0	12	20	388	360	0	0	58	75	60	60		0	0	16.1607	13.1715	17.5612	19.0118	0	0	28.8173	15.7629	18.7332	22.2723
CADAFLAG00001930	AFLA_025540	0	1	10	38	71	47	0	0	8	45	39	22		0	27.9686	8.06012	14.9779	1.92328	1.48552	0	0	2.37891	5.66042	7.28764	4.88763
CADAFLAG00001931	AFLA_025550	0	0	0	0	1	0	0	0	0	0	0	0		0	0	0	0	0.174892	0	0	0	0	0	0	0
CADAFLAG00001932	AFLA_025560	1	1	3	9	180	151	0	0	9	20	12	8		61.8164	79.1452	6.84253	10.0384	13.7978	13.5055	0	0	7.57327	7.11902	6.34538	5.02943
CADAFLAG00001933	AFLA_025570	0	0	11	10	240	223	0	0	20	22	18	19		0	0	11.2304	4.99264	8.2349	8.92789	0	0	7.5332	3.50527	4.26047	5.34677
CADAFLAG00001934	AFLA_025580	0	1	3	1	121	103	0	0	8	20	19	13		0	84.5414	7.30906	1.19142	9.90761	9.84051	0	0	7.19078	7.60441	10.7319	8.73007
CADAFLAG00001935	AFLA_025590	1	3	59	83	2262	1810	0	0	129	248	235	167		19.3176	74.1986	42.053	28.9301	54.1852	50.5899	0	0	33.9219	27.5862	38.8324	32.8092
CADAFLAG00001936	AFLA_025600	0	0	0	0	1	0	0	0	0	0	0	0		0	0	0	0	0.15266	0	0	0	0	0	0	0
CADAFLAG00001937	AFLA_025610	0	0	0	0	0	1	0	0	0	0	0	0		0	0	0	0	0	0.389233	0	0	0	0	0	0
CADAFLAG00001938	AFLA_025620	1	2	20	40	570	507	0	1	44	99	67	62		66.9441	171.42	49.4007	48.3158	47.3174	49.1079	0	861.525	40.0961	38.1622	38.3671	42.2113
CADAFLAG00001939	AFLA_025630	4	2	86	152	3240	2496	0	0	252	583	385	310		145.511	93.1508	115.432	99.7694	146.156	131.375	0	0	124.788	122.121	119.803	114.689
CADAFLAG00001940	AFLA_025640	0	0	4	0	47	35	0	0	2	3	10	6		0	0	16.3663	0	6.46298	5.61565	0	0	3.01903	1.91561	9.48577	6.7667
CADAFLAG00001941	AFLA_025650	1	3	16	21	346	370	0	1	33	103	69	73		64.5638	247.988	38.1154	24.4639	27.7013	34.5639	0	830.893	29.0028	38.2924	38.1075	47.9333
CADAFLAG00001942	AFLA_025660	0	0	0	0	89	71	0	0	1	2	5	5		0	0	0	0	6.19008	5.76185	0	0	0.7635	0.645934	2.39891	2.85212
CADAFLAG00001943	AFLA_025670	0	0	0	0	5	5	0	0	0	1	1	0		0	0	0	0	0.63429	0.74009	0	0	0	0.589074	0.875096	0
CADAFLAG00001944	AFLA_025680	0	0	0	0	7	6	0	0	0	1	0	0		0	0	0	0	1.38568	1.38584	0	0	0	0.919214	0	0
CADAFLAG00001945	AFLA_025690	0	0	4	6	255	207	0	0	6	29	19	22		0	0	15.8814	11.6495	34.0261	32.2285	0	0	8.78873	17.9689	17.489	24.0761
CADAFLAG00001946	AFLA_025700	0	1	2	3	147	109	0	0	13	21	12	10		0	158.967	9.16236	6.72086	22.6328	19.5814	0	0	21.9718	15.0138	12.745	12.6273
CADAFLAG00001947	AFLA_025710	0	0	16	15	520	439	0	0	34	68	52	34		0	0	17.646	8.08992	19.2741	18.9859	0	0	13.8341	11.7039	13.2957	10.3357
CADAFLAG00001948	AFLA_025720	3	3	81	96	3085	2591	0	0	156	594	301	221		57.2675	73.3211	57.051	33.0656	73.0259	71.5626	0	0	40.5367	65.292	49.1503	42.9047
CADAFLAG00001949	AFLA_025730	0	0	25	37	687	593	0	0	56	163	103	95		0	0	38.7282	28.0295	35.7674	36.0231	0	0	32.0052	39.4066	36.9918	40.5643
CADAFLAG00001950	AFLA_025750	8	3	109	220	3292	2657	1	0	280	590	366	318		204.244	98.0621	102.678	101.344	104.221	98.1482	598.389	0	97.3093	86.7357	79.9306	82.568
CADAFLAG00001951	AFLA_025760	6	2	55	198	945	853	0	0	91	309	153	143		471.141	201.072	159.351	280.532	92.0166	96.9126	0	0	97.2699	139.716	102.769	114.199
CADAFLAG00001952	AFLA_025770	1	0	3	34	332	272	0	0	36	48	35	27		28.9957	0	3.20957	17.7881	11.9373	11.4113	0	0	14.2093	8.01422	8.68109	7.96201
CADAFLAG00001953	AFLA_025780	0	0	11	13	249	220	0	0	20	37	23	14		0	0	37.0816	21.4307	28.2103	29.0823	0	0	24.8738	19.4654	17.9752	13.0085
CADAFLAG00001954	AFLA_025790	0	0	1	7	149	123	0	0	5	21	9	10		0	0	3.88404	13.2956	19.4497	18.7339	0	0	7.16473	12.7291	8.10415	10.7058
CADAFLAG00001955	AFLA_025800	0	1	7	8	142	116	0	0	12	26	31	13		0	48.945	9.87365	5.51818	6.73149	6.41619	0	0	6.24463	5.72332	10.1373	5.05425
CADAFLAG00001956	AFLA_025810	0	3	19	34	726	688	0	0	68	114	70	86		0	104.489	19.0711	16.6889	24.4907	27.0801	0	0	25.1812	17.8575	16.2892	23.7933
CADAFLAG00001957	AFLA_025820	0	0	15	47	241	193	0	0	35	140	29	47		0	0	27.9166	42.7755	15.0741	14.0854	0	0	24.0317	40.6624	12.5127	24.1103
CADAFLAG00001958	AFLA_025830	2	0	11	29	451	323	0	0	28	101	56	41		115.293	0	23.3967	30.1638	32.239	26.9405	0	0	21.9718	33.5258	27.6141	24.037
CADAFLAG00001959	AFLA_025840	0	0	9	35	102	71	0	0	8	37	15	19		0	0	11.1925	21.2853	4.26313	3.46246	0	0	3.67047	7.18096	4.32472	6.51288
CADAFLAG00001960	AFLA_025850	0	0	30	71	445	348	0	0	53	98	104	89		0	0	27.7559	32.1232	13.8369	12.6257	0	0	18.0907	14.15	22.3074	22.6965
CADAFLAG00001961	AFLA_025860	11	2	242	570	3454	3016	0	0	396	1586	606	442		233.278	54.304	189.36	218.109	90.8318	92.5431	0	0	114.318	193.674	109.932	95.3298
CADAFLAG00001962	AFLA_025870	1	0	11	40	598	460	0	0	59	103	82	59		16.8525	0	6.83988	12.163	12.4968	11.2164	0	0	13.5349	9.99512	11.8209	10.1121
CADAFLAG00001963	AFLA_025880	2	1	25	61	1080	1029	0	0	103	224	101	80		77.4766	49.5976	35.7332	42.6371	51.8798	57.6749	0	0	54.3144	49.966	33.4683	31.5178
CADAFLAG00001964	AFLA_025890	0	2	21	36	687	641	0	0	49	138	83	65		0	89.8508	27.1883	22.7925	29.8925	32.5432	0	0	23.4048	27.8828	24.9128	23.1958
CADAFLAG00001965	AFLA_025900	0	0	1	0	4	8	0	0	2	2	0	3		0	0	1.6226	0	0.218129	0.509027	0	0	1.19725	0.506449	0	1.34173
CADAFLAG00001966	AFLA_025910	5	1	45	169	820	720	1	0	87	347	158	125		145.463	37.2479	48.3042	88.7126	29.5821	30.3071	681.876	0	34.4538	58.1295	39.3197	36.9842
CADAFLAG00001967	AFLA_025920	2	3	76	106	2183	1787	0	1	220	449	377	295		51.2411	98.408	71.8445	49.0018	69.3548	66.2437	0	329.719	76.727	66.2401	82.6233	76.8663
CADAFLAG00001968	AFLA_025930	7	2	10	20	458	345	0	0	60	66	45	47		72.7382	26.6082	3.83403	3.74983	5.90153	5.18699	0	0	8.48697	3.94907	3.9999	4.96692
CADAFLAG00001969	AFLA_025940	1	2	21	36	202	162	0	0	31	76	45	36		22.913	58.6723	17.7539	14.8834	5.73942	5.37067	0	0	9.66899	10.0273	8.81997	8.389
CADAFLAG00001970	AFLA_025950	0	0	0	1	9	19	0	0	0	2	4	1		0	0	0	1.5064	0.93175	2.29513	0	0	0	0.961477	2.85664	0.849078
CADAFLAG00001971	AFLA_025960	0	0	23	28	852	872	0	0	51	108	90	83		0	0	46.5206	27.695	57.9162	69.163	0	0	38.0569	34.0907	42.2027	46.2732
CADAFLAG00001972	AFLA_025970	3	2	84	155	1319	1071	0	0	128	327	239	196		55.1653	47.0864	56.9922	51.4273	30.0763	28.4948	0	0	32.0399	34.6241	37.5937	36.6544
CADAFLAG00001973	AFLA_025980	2	3	80	158	2209	1932	0	0	198	503	325	270		59.2933	113.872	87.5099	84.5182	81.2093	82.8732	0	0	79.9057	85.8677	82.4198	81.4075
CADAFLAG00001974	AFLA_025990	4	6	82	197	2824	2523	0	0	210	603	342	288		237.173	455.489	179.395	210.761	207.637	216.448	0	0	169.497	205.878	173.462	173.669
CADAFLAG00001975	AFLA_026000	1	1	32	77	824	749	0	0	77	140	105	96		35.8393	45.886	42.3156	49.7929	36.6202	38.8394	0	0	37.5653	28.8917	32.19	34.991
CADAFLAG00001976	AFLA_026010	0	0	11	43	611	554	0	0	42	121	44	54		0	0	15.0025	28.6791	28.0062	29.6292	0	0	21.1332	25.7544	13.9125	20.3001
CADAFLAG00001977	AFLA_026020	8	11	298	698	11096	9787	1	1	897	2210	1368	1162		311.847	548.99	428.607	490.935	536.355	551.991	913.641	501.657	475.971	496.055	456.152	460.662
CADAFLAG00001978	AFLA_026030	1	2	5	23	278	216	0	0	27	58	40	31		41.9851	107.509	7.74563	17.4237	14.4735	13.1214	0	0	15.4311	14.022	14.3657	13.2368
CADAFLAG00001979	AFLA_026040	4	1	54	85	1244	1138	0	0	148	353	135	135		90.7929	29.0611	45.2248	34.8119	35.0144	37.3736	0	0	45.7289	46.1374	26.2119	31.1638
CADAFLAG00001980	AFLA_026050	0	0	5	6	78	80	0	0	7	19	22	19		0	0	8.72961	5.12274	4.5768	5.47715	0	0	4.50888	5.17694	8.90489	9.14349
CADAFLAG00001981	AFLA_026060	0	0	2	11	194	129	0	0	14	45	27	26		0	0	2.0303	5.4607	6.61872	5.13522	0	0	5.24328	7.12913	6.35439	7.27506
CADAFLAG00001982	AFLA_026070	0	0	0	0	0	3	0	0	1	0	0	0		0	0	0	0	0	0.778465	0	0	2.44131	0	0	0
CADAFLAG00001983	AFLA_026080	0	0	2	0	35	26	0	0	1	8	4	4		0	0	4.28227	0	2.51858	2.18302	0	0	0.789933	2.67319	1.98557	2.36069
CADAFLAG00001984	AFLA_026090	2	1	15	24	406	266	0	0	47	123	58	39		372.484	238.45	103.077	80.6503	93.7643	71.6787	0	0	119.155	131.907	92.4012	73.8698
CADAFLAG00001985	AFLA_026100	0	0	15	11	367	290	0	0	41	53	56	49		0	0	32.0317	11.487	26.339	24.2844	0	0	32.3012	17.6628	27.7242	28.8416
CADAFLAG00001986	AFLA_026110	0	0	1	0	8	4	0	0	1	4	1	0		0	0	6.30586	0	1.69542	0.989109	0	0	2.32643	3.9364	1.46193	0
CADAFLAG00001987	AFLA_026120	1	0	75	155	3122	2384	0	0	165	447	215	172		47.4217	0	131.229	132.625	183.588	163.574	0	0	106.512	122.059	87.2144	82.9528
CADAFLAG00001988	AFLA_026130	1	0	138	322	5660	4945	0	0	354	939	430	342		40.0189	0	203.768	232.508	280.877	286.327	0	0	192.844	216.38	147.199	139.193
CADAFLAG00001989	AFLA_026140	0	0	36	180	1355	1164	0	0	98	359	125	106		0	0	38.5918	94.3608	48.8175	48.9312	0	0	38.7583	60.0596	31.0659	31.3208
CADAFLAG00001990	AFLA_026150	1	1	27	116	729	623	0	0	78	194	115	107		14.7331	18.8632	14.6774	30.8369	13.3185	13.2805	0	0	15.6432	16.4582	14.4932	16.0326
CADAFLAG00001991	AFLA_026160	0	0	11	34	706	607	0	0	41	86	62	35		0	0	9.94263	15.0284	21.4465	21.5148	0	0	13.6722	12.1311	12.9922	8.71988
CADAFLAG00001992	AFLA_026170	5	1	49	94	1839	1430	0	0	241	430	224	157		149.453	38.2698	54.0409	50.6968	68.1635	61.8448	0	0	98.0595	74.01	57.2738	47.7266
CADAFLAG00001993	AFLA_026180	1	0	6	5	98	78	0	0	12	18	6	11		127.429	0	28.2104	11.4962	15.4856	14.3811	0	0	20.8154	13.2077	6.54019	14.2556
CADAFLAG00001994	AFLA_026190	2	0	62	110	1476	1229	0	0	118	353	190	138		44.7669	0	51.2047	44.426	40.9683	39.8025	0	0	35.9539	45.4975	36.3792	31.4146
CADAFLAG00001995	AFLA_026200	0	0	6	9	367	330	0	0	54	48	76	84		0	0	8.33157	6.11145	17.1271	17.9692	0	0	27.664	10.4019	24.4664	32.1506
CADAFLAG00001996	AFLA_026210	0	0	1	0	25	15	0	0	1	2	3	2		0	0	8.64513	0	7.26364	5.08514	0	0	3.18946	2.69834	6.01276	4.76579
CADAFLAG00001997	AFLA_026220	0	0	7	3	179	134	0	0	24	33	23	16		0	0	55.1763	11.5638	47.4188	41.4189	0	0	69.7929	40.5941	42.0303	34.7623
CADAFLAG00001998	AFLA_026230	4	2	97	147	4443	3660	0	0	397	788	684	531		91.5078	58.5799	81.8768	60.6782	126.04	121.146	0	0	123.63	103.803	133.852	123.543
[truncated: 12,459 more rows]
