# Supplementary material for: Functional Genomic Analysis of Aspergillus flavus Interacting with Resistant and Susceptible Peanut
Source: MDPI journal article supplement (doi:10.3390/toxins8020046), 2016-02-15
Supplement: s1 [file toxins-114703-Table S5.xlsx]

## Sheet: af_R_T2 vs. af_S_T2
Gene ID	Gene Name	Readcount		Log2 [(af_R_T2)/(af_S_T2)]	q value	Blast Swissprot
		af_R_T2	af_S_T2
CADAFLAG00000464	AFLA_076820	814.22	116.765	2.8018	0.0012395	sp|P13006|GOX_ASPNG Glucose oxidase OS=Aspergillus niger GN=gox PE=1 SV=1//1.47834e-100
CADAFLAG00001753	AFLA_023770	254.33	61.2632	2.0536	0.027919	-//-
CADAFLAG00002291	AFLA_029160	153.711	30.4672	2.3349	0.024998	sp|Q2UK93|XGEA_ASPOR Probable xyloglucan-specific endo-beta-1,4-glucanase A OS=Aspergillus oryzae (strain ATCC 42149 / RIB 40) GN=xgeA PE=3 SV=1//2.49439e-62
CADAFLAG00003661	AFLA_017760	733.525	138.132	2.4088	0.021636	sp|P15245|PH2M_TRICU Phenol 2-monooxygenase OS=Trichosporon cutaneum PE=1 SV=3//4.20266e-142
CADAFLAG00003928	AFLA_020430	180.692	12.3928	3.866	3.7405e-05	-//-
CADAFLAG00006358	AFLA_057490	71.4562	441.283	-2.6266	0.0013722	-//-
CADAFLAG00007567	AFLA_136890	86.8628	12.5226	2.7942	0.027919	-//-
CADAFLAG00009556	AFLA_124980	792.985	161.6	2.2949	0.013397	sp|P20370|DC4C_ACIAD 4-carboxymuconolactone decarboxylase OS=Acinetobacter sp. (strain ADP1) GN=pcaC PE=4 SV=2//9.83574e-28
CADAFLAG00009557	AFLA_124990	2097.2	433.916	2.273	0.0032591	-//-
CADAFLAG00010926	AFLA_049340	5.33775	65.3645	-3.6142	0.024493	sp|Q10494|YDG7_SCHPO Uncharacterized oxidoreductase C26F1.07 OS=Schizosaccharomyces pombe (strain 972 / ATCC 24843) GN=SPAC26F1.07 PE=2 SV=1//6.25842e-24
Novel00399	-//-	232.168	30.9317	2.908	0.0013722	-//-

## Sheet: af_R_T3 vs. af_S_T3
Gene ID	Gene Name	Readcount		Log2 [(af_R_T3)/(af_S_T3)]	q value	Blast Swissprot
		af_R_T3	af_S_T3
CADAFLAG00000021	AFLA_072380	139.405	432.799	-1.6344	2.8514e-09	-//-
CADAFLAG00000026	AFLA_072430	45.8145	4.02059	3.5103	0.0035065	sp|P52959|CTF1B_FUSSO Cutinase transcription factor 1 beta OS=Fusarium solani subsp. pisi GN=CTF1-BETA PE=2 SV=1//4.22395e-21
CADAFLAG00000051	AFLA_072680	1868.73	652.578	1.5178	3.7724e-13	-//-
CADAFLAG00000056	AFLA_072730	92.8668	1080.69	-3.5406	1.227e-65	sp|P38680|MTR_NEUCR N amino acid transport system protein OS=Neurospora crassa (strain ATCC 24698 / 74-OR23-1A / CBS 708.71 / DSM 1257 / FGSC 987) GN=mtr PE=3 SV=2//3.77948e-10
CADAFLAG00000057	AFLA_072740	193.751	1372.72	-2.8248	6.637e-51	sp|O74524|PROD_SCHPO Probable proline dehydrogenase, mitochondrial OS=Schizosaccharomyces pombe (strain 972 / ATCC 24843) GN=SPCC70.03c PE=2 SV=1//1.58166e-36
CADAFLAG00000058	AFLA_072750	321.385	936.616	-1.5432	3.5735e-14	sp|Q12740|P5CR_ZALAR Pyrroline-5-carboxylate reductase OS=Zalerion arboricola GN=P5CR PE=2 SV=1//1.40488e-57
CADAFLAG00000059	AFLA_072760	86.1467	329.052	-1.9334	7.8355e-10	sp|Q9Y7X4|YGRG_SCHPO Uncharacterized membrane protein C365.16 OS=Schizosaccharomyces pombe (strain 972 / ATCC 24843) GN=SPBC365.16 PE=2 SV=1//1.94622e-29
CADAFLAG00000060	AFLA_072770	1419.76	5296.59	-1.8994	5.6712e-44	sp|Q9P8I0|PUT2_EMENI Delta-1-pyrroline-5-carboxylate dehydrogenase, mitochondrial OS=Emericella nidulans (strain FGSC A4 / ATCC 38163 / CBS 112.46 / NRRL 194 / M139) GN=prnC PE=3 SV=2//0
CADAFLAG00000061	AFLA_072780	632.474	3255.8	-2.3639	2.4041e-56	sp|Q9UTM9|FAP2_SCHPO L-saccharopine oxidase OS=Schizosaccharomyces pombe (strain 972 / ATCC 24843) GN=fap2 PE=1 SV=1//6.58911e-52
CADAFLAG00000062	AFLA_072790	346.849	659.561	-0.9272	8.6993e-05	-//-
CADAFLAG00000086	AFLA_073030	1560.03	1135.11	0.45875	0.014054	sp|P19807|HNM1_YEAST Choline transport protein OS=Saccharomyces cerevisiae (strain ATCC 204508 / S288c) GN=HNM1 PE=1 SV=1//2.79283e-11
CADAFLAG00000089	AFLA_073060	86.5709	365.237	-2.0769	7.0615e-12	sp|Q54IL5|UGT52_DICDI UDP-sugar-dependent glycosyltransferase 52 OS=Dictyostelium discoideum GN=ugt52 PE=2 SV=1//1.51213e-70
CADAFLAG00000101	AFLA_073180	122.15	911.201	-2.8991	3.3191e-13	sp|Q92253|RCO3_NEUCR Probable glucose transporter rco-3 OS=Neurospora crassa (strain ATCC 24698 / 74-OR23-1A / CBS 708.71 / DSM 1257 / FGSC 987) GN=rco-3 PE=3 SV=2//7.35415e-154
CADAFLAG00000104	AFLA_073210	281.25	1174.55	-2.0622	3.9364e-27	sp|O34767|OXDD_BACSU Oxalate decarboxylase OxdD OS=Bacillus subtilis (strain 168) GN=oxdD PE=1 SV=1//4.41636e-08
CADAFLAG00000115	AFLA_073320	204.691	529.81	-1.372	2.9687e-08	sp|P07871|THIKB_RAT 3-ketoacyl-CoA thiolase B, peroxisomal OS=Rattus norvegicus GN=Acaa1b PE=2 SV=2//2.3459e-135
CADAFLAG00000121	AFLA_073380	76.7129	15.5649	2.3012	0.0021103	sp|Q9SE93|PNAE_RAUSE Polyneuridine-aldehyde esterase OS=Rauvolfia serpentina GN=PNAE PE=1 SV=1//1.53944e-07
CADAFLAG00000128	AFLA_073450	249.123	948.995	-1.9295	2.5665e-21	sp|Q12556|AMO1_ASPNG Copper amine oxidase 1 OS=Aspergillus niger GN=AO-I PE=1 SV=2//1.74804e-154
CADAFLAG00000139	AFLA_073560	6937.86	1526.02	2.1847	2.2637e-77	sp|P19145|GAP1_YEAST General amino-acid permease GAP1 OS=Saccharomyces cerevisiae (strain ATCC 204508 / S288c) GN=GAP1 PE=1 SV=2//0
CADAFLAG00000148	AFLA_073650	688.644	1954.42	-1.5049	1.2819e-15	sp|A9BQY2|RHMD_DELAS L-rhamnonate dehydratase OS=Delftia acidovorans (strain DSM 14801 / SPH-1) GN=rhmD PE=3 SV=2//1.81192e-130
CADAFLAG00000149	AFLA_073660	135.853	268.273	-0.98165	0.006086	sp|P51831|FABG_BACSU 3-oxoacyl-[acyl-carrier-protein] reductase FabG OS=Bacillus subtilis (strain 168) GN=fabG PE=3 SV=3//7.64662e-25
CADAFLAG00000150	AFLA_073670	346.36	908.941	-1.3919	1.8058e-09	sp|A3LZU8|RMGL_PICST L-rhamnono-gamma-lactonase OS=Scheffersomyces stipitis (strain ATCC 58785 / CBS 6054 / NBRC 10063 / NRRL Y-11545) GN=LRA2 PE=1 SV=2//6.04756e-17
CADAFLAG00000151	AFLA_073680	1345.68	4048.71	-1.5891	3.8808e-13	sp|P54202|ADH2_EMENI Alcohol dehydrogenase 2 OS=Emericella nidulans (strain FGSC A4 / ATCC 38163 / CBS 112.46 / NRRL 194 / M139) GN=alcB PE=3 SV=2//0
CADAFLAG00000161	AFLA_073780	1435.17	8135.33	-2.503	4.4223e-79	-//-
CADAFLAG00000162	AFLA_073790	760.763	1206.98	-0.66588	0.00047105	sp|O34812|YFMJ_BACSU Putative NADP-dependent oxidoreductase YfmJ OS=Bacillus subtilis (strain 168) GN=yfmJ PE=2 SV=1//1.41472e-67
CADAFLAG00000163	AFLA_073800	957.236	6270.07	-2.7115	7.2469e-86	sp|Q9RPT1|RHLG_PSEAE Rhamnolipids biosynthesis 3-oxoacyl-[acyl-carrier-protein] reductase OS=Pseudomonas aeruginosa (strain ATCC 15692 / PAO1 / 1C / PRS 101 / LMG 12228) GN=rhlG PE=1 SV=1//1.75302e-37
CADAFLAG00000164	AFLA_073810	367.814	29.8957	3.621	6.824e-24	sp|O14019|HAL4_SCHPO Serine/threonine-protein kinase hal4 OS=Schizosaccharomyces pombe (strain 972 / ATCC 24843) GN=hal4 PE=1 SV=1//6.598e-56
CADAFLAG00000167	AFLA_073840	1230.6	61.0493	4.3332	1.7995e-80	sp|Q64392|AT12A_CAVPO Potassium-transporting ATPase alpha chain 2 OS=Cavia porcellus GN=ATP12A PE=2 SV=1//5.44477e-169
CADAFLAG00000203	AFLA_074200	15.6273	71.3595	-2.191	0.0071302	-//-
CADAFLAG00000211	AFLA_074280	208.728	636.942	-1.6095	9.5243e-12	sp|A1JS71|6PGL_YERE8 6-phosphogluconolactonase OS=Yersinia enterocolitica serotype O:8 / biotype 1B (strain 8081) GN=pgl PE=3 SV=1//1.23431e-07
CADAFLAG00000212	AFLA_074290	82.6809	233.393	-1.4971	4.9173e-05	-//-
CADAFLAG00000229	AFLA_074460	196.307	94.9418	1.048	0.014752	-//-
CADAFLAG00000237	AFLA_074540	1234.78	2400.17	-0.95889	3.0993e-10	sp|P38364|PID6_FUSSO Pisatin demethylase OS=Fusarium solani subsp. pisi GN=PDA6-1 PE=3 SV=1//2.18463e-23
CADAFLAG00000241	AFLA_074590	116.486	41.6868	1.4825	0.0092152	-//-
CADAFLAG00000244	AFLA_074620	309.703	129.352	1.2596	8.2961e-05	sp|P15710|PHO4_NEUCR Phosphate-repressible phosphate permease OS=Neurospora crassa (strain ATCC 24698 / 74-OR23-1A / CBS 708.71 / DSM 1257 / FGSC 987) GN=pho-4 PE=3 SV=1//5.38521e-29
CADAFLAG00000245	AFLA_074630	146.156	55.2533	1.4034	0.0045302	sp|Q10097|YAOI_SCHPO Uncharacterized transporter C11D3.18C OS=Schizosaccharomyces pombe (strain 972 / ATCC 24843) GN=SPAC11D3.18c PE=2 SV=1//1.50488e-79
CADAFLAG00000262	AFLA_074800	79.4854	209.963	-1.4014	0.00058476	-//-
CADAFLAG00000264	AFLA_074820	73.077	245.161	-1.7462	1.4018e-06	-//-
CADAFLAG00000266	AFLA_074840	143.738	28.1441	2.3525	7.4308e-06	sp|P42087|HUTM_BACSU Putative histidine permease OS=Bacillus subtilis (strain 168) GN=hutM PE=3 SV=2//1.33369e-09
CADAFLAG00000267	AFLA_074850	59.6831	16.0823	1.8918	0.047239	-//-
CADAFLAG00000269	AFLA_074870	239.375	80.9291	1.5645	0.00055693	-//-
CADAFLAG00000276	AFLA_074940	2254.11	3914.77	-0.79637	8.2285e-09	sp|P54232|VEF_GVHA Viral-enhancing factor OS=Heliothis armigera granulosis virus GN=VEF PE=3 SV=1//2.2979e-34
CADAFLAG00000282	AFLA_075000	103.32	35.9384	1.5235	0.020685	-//-
CADAFLAG00000297	AFLA_075150	1906.46	2489.99	-0.38524	0.03084	sp|B0BNE5|ESTD_RAT S-formylglutathione hydrolase OS=Rattus norvegicus GN=Esd PE=1 SV=1//1.12388e-105
CADAFLAG00000316	AFLA_075340	241.648	417.704	-0.78957	0.0079934	sp|O74852|YQ92_SCHPO Uncharacterized MFS-type transporter C18.02 OS=Schizosaccharomyces pombe (strain 972 / ATCC 24843) GN=SPCC18.02 PE=2 SV=1//1.92182e-51
CADAFLAG00000344	AFLA_075620	30.0637	0		0.0033059	-//-
CADAFLAG00000349	AFLA_075670	223.735	506.627	-1.1791	4.9332e-06	sp|P86491|6HN3M_PSEFL 6-hydroxynicotinate 3-monooxygenase OS=Pseudomonas fluorescens PE=1 SV=1//2.29519e-18
CADAFLAG00000354	AFLA_075720	38.6985	102.489	-1.4051	0.021185	sp|Q9X248|FABG_THEMA 3-oxoacyl-[acyl-carrier-protein] reductase FabG OS=Thermotoga maritima (strain ATCC 43589 / MSB8 / DSM 3109 / JCM 10099) GN=fabG PE=3 SV=1//5.77617e-46
CADAFLAG00000373	AFLA_075910	220.08	91.168	1.2714	0.0010143	sp|P50276|MUP1_YEAST High-affinity methionine permease OS=Saccharomyces cerevisiae (strain ATCC 204508 / S288c) GN=MUP1 PE=1 SV=1//9.12636e-11
CADAFLAG00000380	AFLA_075980	9.44624	498.832	-5.7227	6.6168e-75	sp|P0ABR7|YEAW_ECOLI Putative dioxygenase subunit alpha YeaW OS=Escherichia coli (strain K12) GN=yeaW PE=3 SV=1//2.34151e-13
CADAFLAG00000386	AFLA_076040	1168.66	2596.37	-1.1516	1.5544e-14	-//-
CADAFLAG00000390	AFLA_076080	939.197	1416.03	-0.59235	0.0010629	sp|Q9Y7Z5|TTS1_SCHPO Tetra-spanning protein 1 OS=Schizosaccharomyces pombe (strain 972 / ATCC 24843) GN=tts1 PE=1 SV=1//1.69942e-29
CADAFLAG00000392	AFLA_076100	501.175	930.198	-0.89222	8.9974e-06	-//-
CADAFLAG00000399	AFLA_076170	115118	48126.6	1.2582	6.6238e-28	-//-
CADAFLAG00000400	AFLA_076180	22042.9	7424.96	1.5699	1.4202e-28	-//-
CADAFLAG00000401	AFLA_076190	3298.14	995.244	1.7285	2.39e-38	-//-
CADAFLAG00000406	AFLA_076240	300.84	168.3	0.83797	0.016939	sp|O94492|YC7B_SCHPO Uncharacterized aminotransferase C417.11c OS=Schizosaccharomyces pombe (strain 972 / ATCC 24843) GN=SPCC417.11c PE=2 SV=2//1.17878e-138
CADAFLAG00000411	AFLA_076290	163.923	75.8737	1.1113	0.025382	sp|Q5K8R6|CXT1_CRYNJ Beta-1,2-xylosyltransferase 1 OS=Cryptococcus neoformans var. neoformans serotype D (strain JEC21 / ATCC MYA-565) GN=CXT1 PE=1 SV=1//9.77959e-48
CADAFLAG00000425	AFLA_076430	2246.76	3082.4	-0.45621	0.0038049	sp|B5VMJ0|UTH1_YEAS6 Protein UTH1 OS=Saccharomyces cerevisiae (strain AWRI1631) GN=UTH1 PE=3 SV=2//9.49447e-23
CADAFLAG00000427	AFLA_076450	1289.12	1801.18	-0.48255	0.0087962	sp|P78790|ETFA_SCHPO Probable electron transfer flavoprotein subunit alpha, mitochondrial OS=Schizosaccharomyces pombe (strain 972 / ATCC 24843) GN=SPAC27D7.06 PE=2 SV=3//5.87034e-119
CADAFLAG00000434	AFLA_076520	396.856	249.157	0.67156	0.029863	sp|Q2USI0|BST1_ASPOR GPI inositol-deacylase OS=Aspergillus oryzae (strain ATCC 42149 / RIB 40) GN=bst1 PE=3 SV=2//8.94493e-25
CADAFLAG00000435	AFLA_076530	1183.84	682.649	0.79426	8.064e-06	sp|P36035|JEN1_YEAST Carboxylic acid transporter protein homolog OS=Saccharomyces cerevisiae (strain ATCC 204508 / S288c) GN=JEN1 PE=1 SV=1//3.95332e-31
CADAFLAG00000442	AFLA_076600	12131.8	7452.56	0.70299	2.0042e-09	sp|O93796|EF3_CANGA Elongation factor 3 OS=Candida glabrata (strain ATCC 2001 / CBS 138 / JCM 3761 / NBRC 0622 / NRRL Y-65) GN=TEF3 PE=3 SV=2//0
CADAFLAG00000446	AFLA_076640	1538.1	2194.48	-0.51273	0.0019191	sp|P36126|SPO14_YEAST Phospholipase D1 OS=Saccharomyces cerevisiae (strain ATCC 204508 / S288c) GN=SPO14 PE=1 SV=3//8.61719e-14
CADAFLAG00000451	AFLA_076690	1038.75	2627.56	-1.3389	9.1361e-19	-//-
CADAFLAG00000459	AFLA_076770	268.839	465.505	-0.79205	0.0033254	sp|P32604|F26_YEAST Fructose-2,6-bisphosphatase OS=Saccharomyces cerevisiae (strain ATCC 204508 / S288c) GN=FBP26 PE=1 SV=2//2.59574e-49
CADAFLAG00000485	AFLA_077030	89.5478	24.864	1.8486	0.0063625	sp|P39980|SIT1_YEAST Siderophore iron transporter 1 OS=Saccharomyces cerevisiae (strain ATCC 204508 / S288c) GN=SIT1 PE=2 SV=1//4.13165e-131
CADAFLAG00000486	AFLA_077040	536.528	760.322	-0.50296	0.04701	sp|Q4WGV9|PLYD_ASPFU Probable pectate lyase D OS=Neosartorya fumigata (strain ATCC MYA-4609 / Af293 / CBS 101355 / FGSC A1100) GN=plyD PE=3 SV=1//2.35603e-101
CADAFLAG00000507	AFLA_077250	765.271	1354.46	-0.82368	3.8554e-06	sp|O65202|ACOX1_ARATH Peroxisomal acyl-coenzyme A oxidase 1 OS=Arabidopsis thaliana GN=ACX1 PE=1 SV=1//1.94495e-146
CADAFLAG00000510	AFLA_077280	164.015	278.09	-0.76172	0.038352	sp|P33224|AIDB_ECOLI Putative acyl-CoA dehydrogenase AidB OS=Escherichia coli (strain K12) GN=aidB PE=1 SV=3//4.35311e-30
CADAFLAG00000511	AFLA_077290	311.206	133.396	1.2222	0.00018732	-//-
CADAFLAG00000530	AFLA_077480	1895.28	1018.76	0.89561	4.7e-09	sp|P30617|LEC_GALNI Mannose-specific lectin OS=Galanthus nivalis PE=1 SV=1//1.56286e-06
CADAFLAG00000538	AFLA_077560	1019.82	332.602	1.6164	2.0104e-17	sp|P19807|HNM1_YEAST Choline transport protein OS=Saccharomyces cerevisiae (strain ATCC 204508 / S288c) GN=HNM1 PE=1 SV=1//5.57858e-40
CADAFLAG00000553	AFLA_077710	7.51728	47.4828	-2.6591	0.0038182	-//-
CADAFLAG00000556	AFLA_077740	5.69928	35.1742	-2.6257	0.022241	sp|O34421|ACDC_BACSU Probable acyl-CoA dehydrogenase YngJ OS=Bacillus subtilis (strain 168) GN=yngJ PE=3 SV=1//5.83384e-39
CADAFLAG00000566	AFLA_077840	5708.52	11391	-0.99671	8.1649e-16	sp|Q2US83|EGLD_ASPOR Probable endo-beta-1,4-glucanase D OS=Aspergillus oryzae (strain ATCC 42149 / RIB 40) GN=eglD PE=3 SV=1//6.60793e-180
CADAFLAG00000569	AFLA_077870	41.9387	333.86	-2.9929	1.4371e-20	sp|O59699|YN42_SCHPO Uncharacterized transporter C36.02c OS=Schizosaccharomyces pombe (strain 972 / ATCC 24843) GN=SPBC36.02c PE=2 SV=1//1.37625e-64
CADAFLAG00000570	AFLA_077880	353.812	151.477	1.2239	5.4485e-05	sp|Q9P7I1|KHA1_SCHPO K(+)/H(+) antiporter 1 OS=Schizosaccharomyces pombe (strain 972 / ATCC 24843) GN=kha1 PE=2 SV=2//1.02271e-26
CADAFLAG00000603	AFLA_078210	576.813	1123.44	-0.96175	6.9099e-07	-//-
CADAFLAG00000610	AFLA_078280	704.538	471.277	0.5801	0.020038	sp|Q9Y7K5|YGI3_SCHPO Uncharacterized WD repeat-containing protein C2A9.03 OS=Schizosaccharomyces pombe (strain 972 / ATCC 24843) GN=SPBC2A9.03 PE=2 SV=2//9.96416e-24
CADAFLAG00000613	AFLA_078310	593.253	874.332	-0.55953	0.014618	-//-
CADAFLAG00000615	AFLA_078330	424.242	140.896	1.5903	6.3378e-09	-//-
CADAFLAG00000620	AFLA_078380	689.685	2258.22	-1.7112	1.7256e-27	sp|P15937|ACH1_NEUCR Acetyl-CoA hydrolase OS=Neurospora crassa (strain ATCC 24698 / 74-OR23-1A / CBS 708.71 / DSM 1257 / FGSC 987) GN=acu-8 PE=3 SV=2//2.93372e-07
CADAFLAG00000624	AFLA_078420	18842.7	23321.7	-0.30766	0.02782	sp|O13755|OSM1_SCHPO Putative fumarate reductase OS=Schizosaccharomyces pombe (strain 972 / ATCC 24843) GN=osm1 PE=2 SV=1//8.21083e-14
CADAFLAG00000664	AFLA_078820	121.686	328.088	-1.4309	3.4937e-06	-//-
CADAFLAG00000671	AFLA_078890	326.536	626.926	-0.94106	8.7522e-05	sp|Q5BD77|HOGA1_EMENI Probable 4-hydroxy-2-oxoglutarate aldolase, mitochondrial OS=Emericella nidulans (strain FGSC A4 / ATCC 38163 / CBS 112.46 / NRRL 194 / M139) GN=AN1503 PE=1 SV=1//2.92764e-158
CADAFLAG00000684	AFLA_079020	129.343	409.169	-1.6615	4.6496e-09	-//-
CADAFLAG00000701	AFLA_079190	89.3259	246.912	-1.4668	4.9333e-05	sp|Q5ZLG0|AACS_CHICK Acetoacetyl-CoA synthetase OS=Gallus gallus GN=AACS PE=2 SV=1//9.95926e-28
CADAFLAG00000722	AFLA_079400	923.741	552.947	0.74035	0.00037342	sp|Q70LM4|LGRD_BREPA Linear gramicidin synthase subunit D OS=Brevibacillus parabrevis GN=lgrD PE=1 SV=1//1.96671e-51
CADAFLAG00000732	AFLA_079500	595.194	1716.08	-1.5277	1.1117e-19	sp|P49943|XYLB_BACOV Xylosidase/arabinosidase OS=Bacteroides ovatus GN=xsa PE=2 SV=1//1.1896e-123
CADAFLAG00000752	AFLA_079700	419.336	273.257	0.61785	0.042565	sp|O13648|ANM3_SCHPO Ribosomal protein arginine N-methytransferase rmt3 OS=Schizosaccharomyces pombe (strain 972 / ATCC 24843) GN=rmt3 PE=1 SV=3//8.43107e-26
CADAFLAG00000765	AFLA_079830	2136.76	3682.23	-0.78516	4.1342e-07	sp|Q4WYA5|PMP3_ASPFU Plasma membrane proteolipid 3 OS=Neosartorya fumigata (strain ATCC MYA-4609 / Af293 / CBS 101355 / FGSC A1100) GN=pmp3 PE=3 SV=1//1.80614e-32
CADAFLAG00000767	AFLA_079850	5058.89	2691.36	0.91048	3.716e-13	sp|O13899|YF38_SCHPO Uncharacterized CDP-alcohol phosphatidyltransferase class-I family protein C22A12.08c OS=Schizosaccharomyces pombe (strain 972 / ATCC 24843) GN=SPAC22A12.08c PE=2 SV=1//5.08617e-73
CADAFLAG00000790	AFLA_080080	261.818	409.193	-0.64422	0.041214	sp|Q9Y6Z8|PALB_ASPOR Calpain-like protease palB/RIM13 OS=Aspergillus oryzae (strain ATCC 42149 / RIB 40) GN=palB PE=3 SV=1//7.92445e-39
CADAFLAG00000791	AFLA_080090	1072.03	1976.31	-0.88247	4.3343e-08	sp|Q06497|ANT1_YEAST Peroxisomal adenine nucleotide transporter 1 OS=Saccharomyces cerevisiae (strain ATCC 204508 / S288c) GN=ANT1 PE=1 SV=1//1.47531e-64
CADAFLAG00000805	AFLA_080230	2942.92	4426.56	-0.58894	0.042826	sp|P05747|RL29_YEAST 60S ribosomal protein L29 OS=Saccharomyces cerevisiae (strain ATCC 204508 / S288c) GN=RPL29 PE=1 SV=3//1.23223e-11
CADAFLAG00000810	AFLA_080280	516.228	946.902	-0.87521	2.071e-05	sp|Q5ZHT1|ACD11_CHICK Acyl-CoA dehydrogenase family member 11 OS=Gallus gallus GN=ACAD11 PE=2 SV=1//8.07258e-21
CADAFLAG00000820	AFLA_080380	96.7839	201.969	-1.0613	0.010655	-//-
CADAFLAG00000821	AFLA_080390	1145.49	2173.93	-0.92434	2.3361e-09	sp|O74455|6PGL_SCHPO Probable 6-phosphogluconolactonase OS=Schizosaccharomyces pombe (strain 972 / ATCC 24843) GN=SPCC16C4.10 PE=2 SV=1//4.8291e-80
CADAFLAG00000826	AFLA_080440	154.685	72.5936	1.0914	0.031207	-//-
CADAFLAG00000835	AFLA_080530	1875.97	2419.27	-0.36693	0.039213	-//-
CADAFLAG00000842	AFLA_080600	265.722	641.281	-1.271	4.0984e-08	sp|Q2URJ0|PPME1_ASPOR Protein phosphatase methylesterase 1 OS=Aspergillus oryzae (strain ATCC 42149 / RIB 40) GN=ppe1 PE=3 SV=2//2.22891e-09
CADAFLAG00000843	AFLA_080610	400.965	1045.31	-1.3824	2.2807e-08	sp|O13912|YDW6_SCHPO Uncharacterized protein C23C11.06c OS=Schizosaccharomyces pombe (strain 972 / ATCC 24843) GN=SPAC23C11.06c PE=2 SV=1//7.10007e-78
CADAFLAG00000849	AFLA_080670	8534.57	6704.15	0.34826	0.014205	-//-
CADAFLAG00000860	AFLA_080790	147.032	324.314	-1.1413	0.00025563	-//-
CADAFLAG00000866	AFLA_080850	320.666	188.872	0.76366	0.023324	sp|Q9P775|YBEG_SCHPO Uncharacterized WD repeat-containing protein C17D11.16 OS=Schizosaccharomyces pombe (strain 972 / ATCC 24843) GN=SPBC1711.16 PE=1 SV=1//2.06476e-145
CADAFLAG00000867	AFLA_080860	881.868	420.267	1.0693	8.7357e-08	-//-
CADAFLAG00000870	AFLA_080890	246.55	467.949	-0.92447	0.00071903	sp|P71667|NLHH_MYCTU Carboxylesterase NlhH OS=Mycobacterium tuberculosis GN=nlhH PE=1 SV=1//4.52409e-17
CADAFLAG00000871	AFLA_080900	1059.87	3381.49	-1.6738	2.9482e-07	sp|O74407|SYDC_SCHPO Aspartate--tRNA ligase, cytoplasmic OS=Schizosaccharomyces pombe (strain 972 / ATCC 24843) GN=dps1 PE=1 SV=1//8.59668e-127
CADAFLAG00000900	AFLA_081190	759.757	1642.28	-1.1121	7.4596e-05	sp|Q7S6U4|CVNH_NEUCR Cyanovirin-N homolog OS=Neurospora crassa (strain ATCC 24698 / 74-OR23-1A / CBS 708.71 / DSM 1257 / FGSC 987) GN=NCU05495 PE=1 SV=2//2.23869e-23
CADAFLAG00000914	AFLA_081330	2410.6	4891.01	-1.0207	4.852e-14	sp|Q7Z8E7|GPD_COLGL Glycerol-3-phosphate dehydrogenase [NAD(+)] OS=Colletotrichum gloeosporioides PE=2 SV=1//0
CADAFLAG00000915	AFLA_081340	1466.3	2540.62	-0.793	1.5187e-07	sp|Q06625|GDE_YEAST Glycogen debranching enzyme OS=Saccharomyces cerevisiae (strain ATCC 204508 / S288c) GN=GDB1 PE=1 SV=1//0
CADAFLAG00000919	AFLA_081380	1568.77	2199.31	-0.48742	0.0030426	sp|P07142|CY1_NEUCR Cytochrome c1, heme protein, mitochondrial OS=Neurospora crassa (strain ATCC 24698 / 74-OR23-1A / CBS 708.71 / DSM 1257 / FGSC 987) GN=cyt-1 PE=2 SV=1//2.13409e-36
CADAFLAG00000927	AFLA_081470	181.005	91.1918	0.98905	0.036844	sp|P25382|NLE1_YEAST Ribosome assembly protein 4 OS=Saccharomyces cerevisiae (strain ATCC 204508 / S288c) GN=RSA4 PE=1 SV=3//6.16085e-19
CADAFLAG00000928	AFLA_081480	922.023	2501.69	-1.44	8.0022e-21	-//-
CADAFLAG00000934	AFLA_081540	332.563	203.697	0.7072	0.038221	sp|Q5R868|TM246_PONAB Transmembrane protein 246 OS=Pongo abelii GN=TMEM246 PE=2 SV=1//5.02492e-07
CADAFLAG00000935	AFLA_081550	142.896	299.674	-1.0684	0.0013425	sp|A4YI89|HPCD_METS5 3-hydroxypropionyl-coenzyme A dehydratase OS=Metallosphaera sedula (strain ATCC 51363 / DSM 5348) GN=Msed_2001 PE=1 SV=1//2.34468e-24
CADAFLAG00000936	AFLA_081560	503.749	716.661	-0.50859	0.04465	sp|C8VTR5|PAM17_EMENI Presequence translocated-associated motor subunit pam17, mitochondrial OS=Emericella nidulans (strain FGSC A4 / ATCC 38163 / CBS 112.46 / NRRL 194 / M139) GN=pam17 PE=3 SV=1//4.36542e-29
CADAFLAG00000966	AFLA_081860	1569.43	1016.09	0.62722	0.00027964	sp|O94537|PPK4_SCHPO Serine/threonine-protein kinase ppk4 OS=Schizosaccharomyces pombe (strain 972 / ATCC 24843) GN=ppk4 PE=2 SV=1//4.57724e-13
CADAFLAG00000973	AFLA_081930	367.529	213.219	0.78552	0.0097606	-//-
CADAFLAG00000974	AFLA_081940	93.9593	356.702	-1.9246	2.1604e-10	sp|P13249|PUAC_STRAD Puromycin N-acetyltransferase OS=Streptomyces alboniger GN=pac PE=4 SV=2//1.45995e-09
CADAFLAG00000991	AFLA_082110	159.315	464.422	-1.5436	7.9517e-09	sp|Q00808|HETE1_PODAS Vegetative incompatibility protein HET-E-1 OS=Podospora anserina GN=HET-E1 PE=4 SV=1//5.90433e-11
CADAFLAG00000996	AFLA_082160	510.064	75.6031	2.7542	4.2579e-23	sp|P49374|HGT1_KLULA High-affinity glucose transporter OS=Kluyveromyces lactis (strain ATCC 8585 / CBS 2359 / DSM 70799 / NBRC 1267 / NRRL Y-1140 / WM37) GN=HGT1 PE=3 SV=1//2.94268e-08
CADAFLAG00001000	AFLA_082200	91.5969	17.0697	2.4239	0.00028617	sp|A8M1E8|LON_SALAI Lon protease OS=Salinispora arenicola (strain CNS-205) GN=lon PE=3 SV=1//2.95376e-06
CADAFLAG00001008	AFLA_082280	438.956	1730.29	-1.9789	1.1216e-30	sp|P40582|GST1_YEAST Glutathione S-transferase 1 OS=Saccharomyces cerevisiae (strain ATCC 204508 / S288c) GN=GTT1 PE=1 SV=1//3.98632e-11
CADAFLAG00001019	AFLA_082390	388.719	2522.19	-2.6979	3.1087e-25	sp|B8MYV0|XYND_ASPFN Probable exo-1,4-beta-xylosidase xlnD OS=Aspergillus flavus (strain ATCC 200026 / FGSC A1120 / NRRL 3357 / JCM 12722 / SRRC 167) GN=xlnD PE=3 SV=1//0
CADAFLAG00001030	AFLA_082500	265.076	135.418	0.96898	0.010193	sp|P38992|SUR2_YEAST Sphingolipid C4-hydroxylase SUR2 OS=Saccharomyces cerevisiae (strain ATCC 204508 / S288c) GN=SUR2 PE=1 SV=1//6.44869e-23
CADAFLAG00001055	AFLA_082750	30.8446	126.342	-2.0342	8.6036e-05	-//-
CADAFLAG00001056	AFLA_082760	222.725	658.645	-1.5642	1.0855e-11	sp|Q9US44|YIZG_SCHPO Uncharacterized transporter C1002.16c OS=Schizosaccharomyces pombe (strain 972 / ATCC 24843) GN=SPAC1002.16c PE=2 SV=1//6.19004e-26
CADAFLAG00001059	AFLA_082790	523.337	192.869	1.4401	3.8258e-09	-//-
CADAFLAG00001088	AFLA_083080	395.047	633.439	-0.68118	0.0074358	sp|Q9USS6|PPA4_SCHPO Probable acid phosphatase SPBC4.06 OS=Schizosaccharomyces pombe (strain 972 / ATCC 24843) GN=SPBC4.06 PE=2 SV=1//7.40921e-65
CADAFLAG00001091	AFLA_083110	285.729	1107.85	-1.955	2.4244e-13	sp|P10713|CON10_NEUCR Conidiation-specific protein 10 OS=Neurospora crassa (strain ATCC 24698 / 74-OR23-1A / CBS 708.71 / DSM 1257 / FGSC 987) GN=con-10 PE=2 SV=1//3.78941e-06
CADAFLAG00001092	AFLA_083120	2774.41	1877.83	0.56312	0.0051512	sp|Q9UW02|THIO_COPCM Thioredoxin OS=Coprinus comatus PE=1 SV=1//1.40843e-32
CADAFLAG00001104	AFLA_083240	1102.59	2101.83	-0.93076	2.5021e-09	sp|Q763T4|LAD_ASPOZ L-arabinitol 4-dehydrogenase OS=Aspergillus oryzae GN=ladA PE=1 SV=1//0
CADAFLAG00001107	AFLA_083270	236.884	81.6459	1.5367	4.6151e-05	sp|Q9ZU50|BAT1_ARATH Amino-acid permease BAT1 OS=Arabidopsis thaliana GN=BAT1 PE=2 SV=2//2.18334e-10
CADAFLAG00001117	AFLA_083370	1348.63	1912.57	-0.50401	0.0039128	sp|Q873E8|GSHR_NEUCR Glutathione reductase OS=Neurospora crassa (strain ATCC 24698 / 74-OR23-1A / CBS 708.71 / DSM 1257 / FGSC 987) GN=glr-1 PE=3 SV=1//2.82509e-53
CADAFLAG00001124	AFLA_083440	374.84	559.388	-0.57757	0.036523	sp|Q9UUB6|UBLH2_SCHPO Ubiquitin carboxyl-terminal hydrolase 2 OS=Schizosaccharomyces pombe (strain 972 / ATCC 24843) GN=uch2 PE=1 SV=1//3.59169e-67
CADAFLAG00001139	AFLA_083590	627.953	376.981	0.73617	0.0016561	sp|Q03529|SCS7_YEAST Ceramide very long chain fatty acid hydroxylase SCS7 OS=Saccharomyces cerevisiae (strain ATCC 204508 / S288c) GN=SCS7 PE=1 SV=1//2.1122e-133
CADAFLAG00001144	AFLA_083640	827.48	1242.6	-0.58657	0.002638	sp|P87256|LEU3A_ASPNG 3-isopropylmalate dehydrogenase A OS=Aspergillus niger GN=leu2A PE=2 SV=1//0
CADAFLAG00001161	AFLA_083810	265.918	102.489	1.3755	9.2145e-05	sp|Q9P7T8|YIW2_SCHPO Uncharacterized helicase C694.02 OS=Schizosaccharomyces pombe (strain 972 / ATCC 24843) GN=SPAC694.02 PE=2 SV=1//0
CADAFLAG00001165	AFLA_083850	114.442	254.165	-1.1511	0.0019986	-//-
CADAFLAG00001168	AFLA_083880	1321.72	2062.5	-0.64198	0.0058476	sp|Q9P7X0|DHSD_SCHPO Succinate dehydrogenase [ubiquinone] cytochrome b small subunit, mitochondrial OS=Schizosaccharomyces pombe (strain 972 / ATCC 24843) GN=sdh4 PE=2 SV=2//1.70078e-14
CADAFLAG00001172	AFLA_083920	2740.24	2083.48	0.39531	0.020685	sp|Q2UQQ2|PURA_ASPOR Adenylosuccinate synthetase OS=Aspergillus oryzae (strain ATCC 42149 / RIB 40) GN=AO090005001150 PE=3 SV=1//3.32285e-06
CADAFLAG00001175	AFLA_083950	268.835	435.068	-0.69452	0.0192	sp|P25351|YCR3_YEAST Uncharacterized membrane protein YCR023C OS=Saccharomyces cerevisiae (strain ATCC 204508 / S288c) GN=YCR023C PE=1 SV=2//2.6658e-12
CADAFLAG00001205	AFLA_084250	186.445	497.105	-1.4148	3.8703e-08	-//-
CADAFLAG00001207	AFLA_084270	468.266	287.588	0.70332	0.011558	sp|P49018|GPI8_YEAST GPI-anchor transamidase OS=Saccharomyces cerevisiae (strain ATCC 204508 / S288c) GN=GPI8 PE=1 SV=1//1.35944e-139
CADAFLAG00001212	AFLA_084330	2783.25	3702.67	-0.4118	0.009749	sp|P23641|MPCP_YEAST Mitochondrial phosphate carrier protein OS=Saccharomyces cerevisiae (strain ATCC 204508 / S288c) GN=MIR1 PE=1 SV=1//5.42333e-35
CADAFLAG00001215	AFLA_084360	352.112	528.481	-0.58582	0.044096	sp|P58137|ACOT8_MOUSE Acyl-coenzyme A thioesterase 8 OS=Mus musculus GN=Acot8 PE=1 SV=1//3.35053e-15
CADAFLAG00001216	AFLA_084370	212.525	638.789	-1.5877	8.5773e-12	-//-
CADAFLAG00001225	AFLA_084460	932.246	1391.48	-0.57784	0.0064109	sp|P31540|HSP98_NEUCR Heat shock protein hsp98 OS=Neurospora crassa (strain ATCC 24698 / 74-OR23-1A / CBS 708.71 / DSM 1257 / FGSC 987) GN=hsp98 PE=1 SV=2//0
CADAFLAG00001229	AFLA_084500	221.307	89.9339	1.2991	0.00099005	sp|P19807|HNM1_YEAST Choline transport protein OS=Saccharomyces cerevisiae (strain ATCC 204508 / S288c) GN=HNM1 PE=1 SV=1//2.6855e-70
CADAFLAG00001236	AFLA_084570	115.524	222.836	-0.94779	0.016578	-//-
CADAFLAG00001244	AFLA_084650	3007.45	4958.56	-0.72138	2.0625e-07	sp|O32184|YUSR_BACSU Short-chain dehydrogenase/reductase homolog YusR OS=Bacillus subtilis (strain 168) GN=yusR PE=5 SV=1//1.30158e-07
CADAFLAG00001245	AFLA_084660	782.013	1381.5	-0.82097	4.9124e-06	sp|P06208|LEU1_YEAST 2-isopropylmalate synthase OS=Saccharomyces cerevisiae (strain ATCC 204508 / S288c) GN=LEU4 PE=1 SV=1//2.61834e-12
CADAFLAG00001250	AFLA_084710	657.053	1059.65	-0.68951	0.00078459	sp|Q7SGY1|ALO_NEUCR Putative D-arabinono-1,4-lactone oxidase OS=Neurospora crassa (strain ATCC 24698 / 74-OR23-1A / CBS 708.71 / DSM 1257 / FGSC 987) GN=alo-1 PE=3 SV=1//0
CADAFLAG00001253	AFLA_084740	501.689	917.125	-0.87032	1.6545e-05	-//-
CADAFLAG00001260	AFLA_084810	253.009	130.387	0.9564	0.013664	-//-
CADAFLAG00001263	AFLA_084840	946.294	1288.83	-0.4457	0.03323	-//-
CADAFLAG00001269	AFLA_084900	307.151	175.083	0.81091	0.020397	sp|P33277|GAP1_SCHPO GTPase-activating protein OS=Schizosaccharomyces pombe (strain 972 / ATCC 24843) GN=gap1 PE=2 SV=1//2.41712e-10
CADAFLAG00001274	AFLA_084950	985.502	4141.02	-2.0711	1.9332e-11	-//-
CADAFLAG00001293	AFLA_085140	493.407	195.456	1.3359	2.3864e-07	-//-
CADAFLAG00001295	AFLA_085160	198.572	70.3484	1.4971	0.00037503	sp|Q08234|YO075_YEAST Uncharacterized ABC transporter ATP-binding protein/permease YOL075C OS=Saccharomyces cerevisiae (strain ATCC 204508 / S288c) GN=YOL075C PE=1 SV=3//0
CADAFLAG00001296	AFLA_085170	1152.21	820.655	0.48956	0.018509	sp|Q9UT46|MOC3_SCHPO Transcriptional regulatory protein moc3 OS=Schizosaccharomyces pombe (strain 972 / ATCC 24843) GN=moc3 PE=1 SV=4//3.5965e-06
CADAFLAG00001299	AFLA_085200	574.503	391.876	0.55192	0.049385	sp|Q10294|PAC2_SCHPO cAMP-independent regulatory protein pac2 OS=Schizosaccharomyces pombe (strain 972 / ATCC 24843) GN=pac2 PE=2 SV=1//7.46851e-57
CADAFLAG00001311	AFLA_085320	671.197	432.329	0.63461	0.01023	sp|Q9P7I2|KCC1_SCHPO Calcium/calmodulin-dependent protein kinase type I OS=Schizosaccharomyces pombe (strain 972 / ATCC 24843) GN=cmk1 PE=1 SV=1//1.629e-126
CADAFLAG00001319	AFLA_085400	4547.77	7839.38	-0.78558	1.1982e-09	sp|B8CYG0|GPMI_HALOH 2,3-bisphosphoglycerate-independent phosphoglycerate mutase OS=Halothermothrix orenii (strain H 168 / OCM 544 / DSM 9562) GN=gpmI PE=3 SV=1//7.09821e-12
CADAFLAG00001326	AFLA_085470	202.531	557.636	-1.4612	2.9185e-09	-//-
CADAFLAG00001327	AFLA_085480	206.698	411.661	-0.99393	0.00065916	sp|Q8J0P4|CRF1_ASPFU Probable glycosidase crf1 OS=Neosartorya fumigata (strain ATCC MYA-4609 / Af293 / CBS 101355 / FGSC A1100) GN=crf1 PE=1 SV=2//1.19353e-78
CADAFLAG00001332	AFLA_085530	276.025	158.013	0.80475	0.03487	sp|Q9HFE4|FMO1_SCHPO Thiol-specific monooxygenase OS=Schizosaccharomyces pombe (strain 972 / ATCC 24843) GN=fmo1 PE=1 SV=1//4.30598e-43
CADAFLAG00001360	AFLA_085810	541.909	296.664	0.86922	0.00059038	sp|Q9FME8|OPT4_ARATH Oligopeptide transporter 4 OS=Arabidopsis thaliana GN=OPT4 PE=2 SV=1//3.15135e-63
CADAFLAG00001367	AFLA_085880	386.036	839.405	-1.1206	1.1744e-07	-//-
CADAFLAG00001391	AFLA_086120	138.662	323.503	-1.2222	0.00014738	-//-
CADAFLAG00001409	AFLA_086300	513.426	732.544	-0.51276	0.033443	sp|Q1MTR3|VID27_SCHPO Vacuolar import and degradation protein 27 OS=Schizosaccharomyces pombe (strain 972 / ATCC 24843) GN=vid27 PE=1 SV=1//0
CADAFLAG00001414	AFLA_086350	17.8483	542.518	-4.9258	4.0534e-66	sp|O74529|YJ48_SCHPO Uncharacterized methyltransferase C70.08c OS=Schizosaccharomyces pombe (strain 972 / ATCC 24843) GN=SPCC70.08c PE=2 SV=1//1.28784e-33
CADAFLAG00001415	AFLA_086360	46.2767	315.015	-2.7671	2.8144e-17	sp|Q2UQ40|PGXC_ASPOR Probable exopolygalacturonase C OS=Aspergillus oryzae (strain ATCC 42149 / RIB 40) GN=pgxC PE=3 SV=1//0
CADAFLAG00001419	AFLA_086400	1957.77	3709.89	-0.92217	4.5032e-11	sp|P79089|IDHP_ASPNG Isocitrate dehydrogenase [NADP], mitochondrial OS=Aspergillus niger GN=icdA PE=2 SV=1//3.14008e-72
CADAFLAG00001423	AFLA_086440	787.655	546.363	0.52771	0.029842	sp|O43125|CSH3_SCHPO Protein csh3 OS=Schizosaccharomyces pombe (strain 972 / ATCC 24843) GN=csh3 PE=2 SV=1//9.41627e-09
CADAFLAG00001464	AFLA_086850	274.058	119.559	1.1968	0.00053289	sp|Q04608|YD124_YEAST Uncharacterized protein YDR124W OS=Saccharomyces cerevisiae (strain ATCC 204508 / S288c) GN=YDR124W PE=1 SV=1//1.42571e-14
CADAFLAG00001475	AFLA_086960	356.026	982.594	-1.4646	2.2666e-13	sp|Q9P7L4|YOS9_SCHPO Uncharacterized hydrolase C21C3.09c OS=Schizosaccharomyces pombe (strain 972 / ATCC 24843) GN=SPBC21C3.09c PE=2 SV=1//3.44942e-12
CADAFLAG00001478	AFLA_086990	2027.36	6742.67	-1.7337	7.0157e-05	-//-
CADAFLAG00001488	AFLA_087090	779.747	352.976	1.1434	6.7274e-08	sp|P21657|DAL81_YEAST Transcriptional activator protein DAL81 OS=Saccharomyces cerevisiae (strain ATCC 204508 / S288c) GN=DAL81 PE=1 SV=3//1.31361e-72
CADAFLAG00001493	AFLA_087140	714.085	1082.34	-0.59999	0.0034426	sp|Q9Y7N9|YCKC_SCHPO PX domain-containing protein C1450.12 OS=Schizosaccharomyces pombe (strain 972 / ATCC 24843) GN=SPCC1450.12 PE=1 SV=1//4.9752e-06
CADAFLAG00001496	AFLA_087170	1253.6	2600.86	-1.0529	1.9323e-12	-//-
CADAFLAG00001504	AFLA_087260	268.132	436.525	-0.70312	0.020685	-//-
CADAFLAG00001505	AFLA_087270	396.122	140.179	1.4987	1.7852e-07	sp|P40445|YIQ6_YEAST Uncharacterized transporter YIL166C OS=Saccharomyces cerevisiae (strain ATCC 204508 / S288c) GN=YIL166C PE=1 SV=1//1.23236e-23
CADAFLAG00001506	AFLA_087280	6384.6	3285.85	0.95833	9.9098e-15	sp|Q12358|JLP1_YEAST Alpha-ketoglutarate-dependent sulfonate dioxygenase OS=Saccharomyces cerevisiae (strain ATCC 204508 / S288c) GN=JLP1 PE=2 SV=1//8.63951e-85
CADAFLAG00001510	AFLA_087320	190.527	386.08	-1.0189	0.00051559	sp|P19807|HNM1_YEAST Choline transport protein OS=Saccharomyces cerevisiae (strain ATCC 204508 / S288c) GN=HNM1 PE=1 SV=1//1.84218e-14
CADAFLAG00001513	AFLA_087350	1391.02	934.935	0.57321	0.0016846	sp|Q9P8W3|ACE1_HYPJE Zinc finger transcription factor ace1 OS=Hypocrea jecorina GN=ace1 PE=4 SV=1//1.69054e-91
CADAFLAG00001521	AFLA_087430	3031.33	2211.91	0.45465	0.0044735	sp|O60024|ALL4_ASPFU Allergen Asp f 4 OS=Neosartorya fumigata (strain ATCC MYA-4609 / Af293 / CBS 101355 / FGSC A1100) GN=AFUA_2G03830 PE=1 SV=2//1.5573e-86
CADAFLAG00001541	AFLA_087630	451.094	885.876	-0.97368	2.9613e-06	sp|Q00217|TPSB_ASPNG Alpha,alpha-trehalose-phosphate synthase [UDP-forming] 2 OS=Aspergillus niger GN=tpsB PE=3 SV=1//6.78331e-37
CADAFLAG00001542	AFLA_087640	1013.45	1347.48	-0.41099	0.042785	sp|Q9UUI7|TPSY_SCHPO Putative alpha,alpha-trehalose-phosphate synthase [UDP-forming] 100 kDa subunit OS=Schizosaccharomyces pombe (strain 972 / ATCC 24843) GN=SPAC22F8.05 PE=1 SV=1//3.24339e-156
CADAFLAG00001549	AFLA_087710	1732.13	1174.79	0.56014	0.00094885	sp|O14201|MUG86_SCHPO Meiotically up-regulated gene 86 protein OS=Schizosaccharomyces pombe (strain 972 / ATCC 24843) GN=mug86 PE=1 SV=1//3.22406e-42
CADAFLAG00001559	AFLA_087810	2317.02	1281.42	0.85452	8.9554e-09	sp|P22697|CYS3_NEUCR Regulatory protein cys-3 OS=Neurospora crassa (strain ATCC 24698 / 74-OR23-1A / CBS 708.71 / DSM 1257 / FGSC 987) GN=cys-3 PE=1 SV=1//7.32366e-14
CADAFLAG00001560	AFLA_087820	472.403	937.522	-0.98884	5.6102e-07	sp|P53252|PIL1_YEAST Sphingolipid long chain base-responsive protein PIL1 OS=Saccharomyces cerevisiae (strain ATCC 204508 / S288c) GN=PIL1 PE=1 SV=1//3.04484e-09
CADAFLAG00001565	AFLA_087870	172.202	84.926	1.0198	0.042761	sp|Q2UPQ4|EGLB_ASPOR Probable endo-beta-1,4-glucanase B OS=Aspergillus oryzae (strain ATCC 42149 / RIB 40) GN=eglB PE=3 SV=1//0
CADAFLAG00001566	AFLA_087880	1016.65	1367.91	-0.42816	0.043033	sp|O13729|PUN1_SCHPO SUR7 family protein pun1 OS=Schizosaccharomyces pombe (strain 972 / ATCC 24843) GN=pun1 PE=2 SV=1//7.51798e-09
CADAFLAG00001568	AFLA_087900	4097.63	3138.28	0.38482	0.011257	sp|Q12669|KPYK_ASPNG Pyruvate kinase OS=Aspergillus niger GN=pkiA PE=3 SV=1//1.70959e-06
CADAFLAG00001572	AFLA_087940	152.555	523.227	-1.7781	2.9793e-12	sp|Q9UUA7|YHAH_SCHPO UPF0590 protein C409.17c OS=Schizosaccharomyces pombe (strain 972 / ATCC 24843) GN=SPBC409.17c PE=2 SV=1//2.5566e-09
CADAFLAG00001573	AFLA_087950	390.536	638.342	-0.70888	0.0026499	sp|O14104|LYS12_SCHPO Probable homoisocitrate dehydrogenase OS=Schizosaccharomyces pombe (strain 972 / ATCC 24843) GN=lys12 PE=1 SV=1//2.35331e-14
CADAFLAG00001606	AFLA_088280	178.147	350.859	-0.97783	0.0022852	sp|Q04835|YM87_YEAST Uncharacterized membrane protein YMR253C OS=Saccharomyces cerevisiae (strain ATCC 204508 / S288c) GN=YMR253C PE=1 SV=1//9.6911e-45
CADAFLAG00001607	AFLA_088290	420.151	935.699	-1.1551	7.3283e-09	-//-
CADAFLAG00001639	AFLA_088610	217.956	781.237	-1.8417	1.8746e-17	sp|Q01578|GNL_ZYMMO Gluconolactonase OS=Zymomonas mobilis subsp. mobilis (strain ATCC 31821 / ZM4 / CP4) GN=gnl PE=1 SV=2//4.64026e-10
CADAFLAG00001659	AFLA_088810	2176.27	4450.42	-1.0321	5.4389e-14	sp|A6QLU1|GPDM_BOVIN Glycerol-3-phosphate dehydrogenase, mitochondrial OS=Bos taurus GN=GPD2 PE=2 SV=1//4.641e-15
CADAFLAG00001668	AFLA_022820	61.0568	209.469	-1.7785	8.4309e-06	-//-
CADAFLAG00001669	AFLA_022830	52.5993	179.844	-1.7736	3.7083e-05	-//-
CADAFLAG00001674	AFLA_022880	4265.31	1146.27	1.8957	3.4988e-50	sp|P46030|PTR2_CANAX Peptide transporter PTR2 OS=Candida albicans GN=PTR2 PE=3 SV=1//9.9125e-13
CADAFLAG00001675	AFLA_022990	119.929	37.6663	1.6708	0.0024503	-//-
CADAFLAG00001677	AFLA_023010	1225.15	445.06	1.4609	5.7852e-17	-//-
CADAFLAG00001684	AFLA_023080	708.01	471.03	0.58795	0.018442	-//-
CADAFLAG00001701	AFLA_023250	83.9007	270.447	-1.6886	0.045802	-//-
CADAFLAG00001702	AFLA_023260	341.113	737.974	-1.1133	4.3002e-07	sp|P28348|NIRA_EMENI Nitrogen assimilation transcription factor nirA OS=Emericella nidulans (strain FGSC A4 / ATCC 38163 / CBS 112.46 / NRRL 194 / M139) GN=nirA PE=4 SV=1//3.30703e-32
CADAFLAG00001703	AFLA_023270	175.426	382.307	-1.1239	0.00012907	sp|Q9Y7S4|YQO5_SCHPO Uncharacterized transporter C569.05c OS=Schizosaccharomyces pombe (strain 972 / ATCC 24843) GN=SPCC569.05c PE=2 SV=1//5.22567e-134
CADAFLAG00001707	AFLA_023310	32.2613	125.625	-1.9613	0.0013469	-//-
CADAFLAG00001709	AFLA_023330	59.9142	239.588	-1.9996	8.3077e-06	-//-
CADAFLAG00001710	AFLA_023340	382.348	1836.4	-2.2639	1.8182e-40	sp|A1DBT4|PMEA_NEOFI Probable pectinesterase A OS=Neosartorya fischeri (strain ATCC 1020 / DSM 3700 / FGSC A1164 / NRRL 181) GN=pmeA PE=3 SV=1//5.35307e-121
CADAFLAG00001714	AFLA_023380	183.484	96.9402	0.92049	0.045049	sp|Q4U3Y2|HXK1_ASPFU Hexokinase-1 OS=Neosartorya fumigata (strain ATCC MYA-4609 / Af293 / CBS 101355 / FGSC A1100) GN=hxkA PE=2 SV=1//2.67281e-20
CADAFLAG00001715	AFLA_023390	1215.66	1598.81	-0.39526	0.049863	sp|Q00298|CUTI_BOTFU Cutinase OS=Botryotinia fuckeliana GN=cutA PE=3 SV=1//6.43472e-16
CADAFLAG00001719	AFLA_023430	4204.12	2840.63	0.56559	2.0798e-05	sp|Q9UTR6|OCH1_SCHPO Initiation-specific alpha-1,6-mannosyltransferase OS=Schizosaccharomyces pombe (strain 972 / ATCC 24843) GN=och1 PE=1 SV=2//2.99832e-30
CADAFLAG00001720	AFLA_023440	1713.63	1172.82	0.54708	0.0015625	-//-
CADAFLAG00001721	AFLA_023450	1826.52	682.792	1.4196	6.3982e-20	-//-
CADAFLAG00001722	AFLA_023460	206.962	454.255	-1.1341	0.034968	sp|Q9USK8|AGS1_SCHPO Cell wall alpha-1,3-glucan synthase ags1 OS=Schizosaccharomyces pombe (strain 972 / ATCC 24843) GN=ags1 PE=1 SV=3//6.85124e-07
CADAFLAG00001724	AFLA_023480	1567.45	2176.35	-0.47349	0.0052104	sp|P0C1B4|AMYA3_ASPOR Alpha-amylase A type-3 OS=Aspergillus oryzae (strain ATCC 42149 / RIB 40) GN=amy3 PE=3 SV=1//1.06654e-158
CADAFLAG00001725	AFLA_023490	97.3517	205.249	-1.0761	0.0079459	sp|P19571|AMT6_BACS7 Glucan 1,4-alpha-maltohexaosidase OS=Bacillus sp. (strain 707) PE=1 SV=1//3.84095e-155
CADAFLAG00001726	AFLA_023500	752.85	2205.98	-1.551	5.8984e-23	-//-
CADAFLAG00001727	AFLA_023510	262.361	1250.25	-2.2526	3.4827e-15	sp|Q57664|GALE_METJA Putative UDP-glucose 4-epimerase OS=Methanocaldococcus jannaschii (strain ATCC 43067 / DSM 2661 / JAL-1 / JCM 10045 / NBRC 100440) GN=MJ0211 PE=3 SV=1//2.95285e-08
CADAFLAG00001732	AFLA_023560	17.4704	68.3262	-1.9675	0.010445	sp|P39458|NARB_SYNE7 Nitrate reductase OS=Synechococcus elongatus (strain PCC 7942) GN=narB PE=1 SV=2//3.90193e-123
CADAFLAG00001736	AFLA_023600	6075.24	21805.7	-1.8437	2.9595e-33	-//-
CADAFLAG00001754	AFLA_023780	276.596	469.136	-0.76222	0.046355	sp|P53912|YNN4_YEAST Uncharacterized protein YNL134C OS=Saccharomyces cerevisiae (strain ATCC 204508 / S288c) GN=YNL134C PE=1 SV=1//1.12644e-20
CADAFLAG00001780	AFLA_024040	97.7296	34.6568	1.4957	0.020275	sp|O94490|YC79_SCHPO Uncharacterized transcriptional regulatory protein C417.09c OS=Schizosaccharomyces pombe (strain 972 / ATCC 24843) GN=SPCC417.09c PE=2 SV=1//6.44684e-26
CADAFLAG00001782	AFLA_024060	350.97	547.844	-0.64242	0.017799	sp|O62742|NLTP_RABIT Non-specific lipid-transfer protein OS=Oryctolagus cuniculus GN=SCP2 PE=1 SV=1//3.47324e-37
CADAFLAG00001783	AFLA_024070	924.18	646.782	0.51489	0.018822	sp|Q54ZM4|C518A_DICDI Probable cytochrome P450 518A1 OS=Dictyostelium discoideum GN=cyp518A1 PE=3 SV=1//2.46352e-09
CADAFLAG00001786	AFLA_024100	914.135	573.472	0.67268	0.0012105	-//-
CADAFLAG00001824	AFLA_024480	1421.51	2831.21	-0.99399	5.2376e-06	sp|Q9HGZ1|K6PF1_ASPOR 6-phosphofructokinase subunit alpha OS=Aspergillus oryzae (strain ATCC 42149 / RIB 40) GN=pfkA PE=2 SV=1//0
CADAFLAG00001827	AFLA_024510	3083.82	1071.52	1.5251	6.3543e-30	sp|Q2U2Y9|QUTD_ASPOR Probable quinate permease OS=Aspergillus oryzae (strain ATCC 42149 / RIB 40) GN=qutD PE=3 SV=1//3.59877e-49
CADAFLAG00001837	AFLA_024610	112.795	900.088	-2.9964	4.6168e-10	sp|C0SPA5|ADHA_BACSU Probable formaldehyde dehydrogenase AdhA OS=Bacillus subtilis (strain 168) GN=adhA PE=2 SV=1//5.28977e-42
CADAFLAG00001839	AFLA_024630	749.646	332.579	1.1725	3.173e-08	-//-
CADAFLAG00001847	AFLA_024710	46.6493	204.708	-2.1336	1.0404e-07	-//-
CADAFLAG00001852	AFLA_024760	65.9931	656.447	-3.3143	2.0278e-19	-//-
CADAFLAG00001853	AFLA_024770	5.50405	54.266	-3.3015	0.00010729	sp|Q13231|CHIT1_HUMAN Chitotriosidase-1 OS=Homo sapiens GN=CHIT1 PE=1 SV=1//2.12816e-34
CADAFLAG00001854	AFLA_024780	34.5253	313.487	-3.1827	2.9911e-21	-//-
CADAFLAG00001855	AFLA_024790	178.227	307.221	-0.78556	0.023243	-//-
CADAFLAG00001857	AFLA_024810	71.1372	301.648	-2.0842	4.0031e-10	sp|Q10487|MFS1_SCHPO Transporter mfs1 OS=Schizosaccharomyces pombe (strain 972 / ATCC 24843) GN=mfs1 PE=2 SV=1//1.50787e-50
CADAFLAG00001863	AFLA_024870	280.447	150.936	0.8938	0.010147	sp|P40991|NOP2_YEAST Putative ribosomal RNA methyltransferase Nop2 OS=Saccharomyces cerevisiae (strain ATCC 204508 / S288c) GN=NOP2 PE=1 SV=1//1.06432e-171
CADAFLAG00001868	AFLA_024920	595.276	300.366	0.98684	1.8843e-05	sp|Q03516|RSN1_YEAST Uncharacterized protein RSN1 OS=Saccharomyces cerevisiae (strain ATCC 204508 / S288c) GN=RSN1 PE=1 SV=1//2.13156e-149
CADAFLAG00001873	AFLA_024970	1587.02	1059.89	0.5824	0.0012037	-//-
CADAFLAG00001886	AFLA_025100	19178.2	30008.6	-0.64591	9.5782e-08	sp|Q9HGY7|G3P_ASPOR Glyceraldehyde-3-phosphate dehydrogenase OS=Aspergillus oryzae (strain ATCC 42149 / RIB 40) GN=gpdA PE=2 SV=1//0
CADAFLAG00001889	AFLA_025130	564.152	354.139	0.67177	0.0080379	-//-
CADAFLAG00001895	AFLA_025190	15.3766	192.153	-3.6434	2.8085e-17	sp|O59952|LIP_THELA Lipase OS=Thermomyces lanuginosus GN=LIP PE=1 SV=1//6.27361e-69
CADAFLAG00001901	AFLA_025250	30.3269	253.154	-3.0613	2.2491e-13	-//-
CADAFLAG00001909	AFLA_025330	9119.43	5945.93	0.61704	2.3328e-07	-//-
CADAFLAG00001917	AFLA_025410	211.921	346.615	-0.70981	0.03994	sp|C7GX75|OAF3_YEAS2 Oleate activated transcription factor 3 OS=Saccharomyces cerevisiae (strain JAY291) GN=OAF3 PE=3 SV=1//8.65485e-08
CADAFLAG00001928	AFLA_025520	811.016	4107.55	-2.3405	4.0644e-59	-//-
CADAFLAG00001930	AFLA_025540	20.8753	82.1633	-1.9767	0.012951	sp|A5YM72|CRNS1_HUMAN Carnosine synthase 1 OS=Homo sapiens GN=CARNS1 PE=1 SV=3//5.08358e-10
CADAFLAG00001948	AFLA_025720	1014.19	711.183	0.51204	0.020441	sp|Q9P326|PRO1_NEUCR Transcriptional regulatory protein pro-1 OS=Neurospora crassa (strain ATCC 24698 / 74-OR23-1A / CBS 708.71 / DSM 1257 / FGSC 987) GN=pro-1 PE=2 SV=1//3.97446e-14
CADAFLAG00001960	AFLA_025850	141.268	264.746	-0.90618	0.015116	sp|Q2UJE8|KYNU2_ASPOR Kynureninase 2 OS=Aspergillus oryzae (strain ATCC 42149 / RIB 40) GN=bna5-2 PE=3 SV=1//0
CADAFLAG00001987	AFLA_026120	979.875	529.269	0.8886	4.2352e-06	sp|A7BJS7|PRTT_ASPOR Transcriptional activator of proteases prtT OS=Aspergillus oryzae (strain ATCC 42149 / RIB 40) GN=prtT PE=3 SV=1//0
CADAFLAG00001988	AFLA_026130	1898.08	1055.53	0.84657	5.4686e-08	sp|A7BJS7|PRTT_ASPOR Transcriptional activator of proteases prtT OS=Aspergillus oryzae (strain ATCC 42149 / RIB 40) GN=prtT PE=3 SV=1//0
CADAFLAG00002003	AFLA_026280	326.152	616.664	-0.91894	0.00012633	sp|O14346|HACD_SCHPO Probable very-long-chain (3R)-3-hydroxyacyl-[acyl-carrier protein] dehydratase OS=Schizosaccharomyces pombe (strain 972 / ATCC 24843) GN=SPBC19C2.15c PE=2 SV=2//2.168e-18
CADAFLAG00002005	AFLA_026300	351.274	1117.49	-1.6696	3.9868e-18	-//-
CADAFLAG00002006	AFLA_026310	179.112	674.561	-1.9131	2.1001e-05	sp|Q08BI9|MCU_DANRE Calcium uniporter protein, mitochondrial OS=Danio rerio GN=mcu PE=2 SV=1//3.35767e-06
CADAFLAG00002007	AFLA_026320	878.274	470.441	0.90066	5.9752e-06	-//-
CADAFLAG00002022	AFLA_026470	1140.34	1701.08	-0.57699	0.00096483	sp|Q4R559|AATM_MACFA Aspartate aminotransferase, mitochondrial OS=Macaca fascicularis GN=GOT2 PE=2 SV=1//3.12194e-47
CADAFLAG00002025	AFLA_026500	1812.02	1291.05	0.48906	0.0044232	-//-
CADAFLAG00002046	AFLA_026710	451.514	760.968	-0.75307	0.044756	sp|Q07821|ISA1_YEAST Iron-sulfur assembly protein 1 OS=Saccharomyces cerevisiae (strain ATCC 204508 / S288c) GN=ISA1 PE=1 SV=1//1.1566e-49
CADAFLAG00002057	AFLA_026820	389.824	222.812	0.80699	0.0082201	sp|O94413|KPR2_SCHPO Ribose-phosphate pyrophosphokinase 2 OS=Schizosaccharomyces pombe (strain 972 / ATCC 24843) GN=SPCC1620.06c PE=1 SV=1//1.72971e-172
CADAFLAG00002070	AFLA_026950	9989.9	13071.4	-0.38788	0.0059195	sp|Q05493|THIK_YARLI 3-ketoacyl-CoA thiolase, peroxisomal OS=Yarrowia lipolytica (strain CLIB 122 / E 150) GN=POT1 PE=3 SV=1//3.75992e-43
CADAFLAG00002078	AFLA_027030	1495.38	2165.7	-0.53432	0.0015115	sp|Q92406|NDUV1_ASPNG NADH-ubiquinone oxidoreductase 51 kDa subunit, mitochondrial OS=Aspergillus niger GN=NUO51 PE=3 SV=1//0
CADAFLAG00002082	AFLA_027070	2195.52	1641.31	0.41972	0.016344	sp|P16928|ACSA_EMENI Acetyl-coenzyme A synthetase OS=Emericella nidulans (strain FGSC A4 / ATCC 38163 / CBS 112.46 / NRRL 194 / M139) GN=facA PE=2 SV=2//1.68887e-18
CADAFLAG00002086	AFLA_027110	354.337	1672.36	-2.2387	1.9824e-15	sp|Q9USG8|MU190_SCHPO Meiotically up-regulated gene 190 protein OS=Schizosaccharomyces pombe (strain 972 / ATCC 24843) GN=mug190 PE=1 SV=1//0
CADAFLAG00002089	AFLA_027140	709.38	443.356	0.67809	0.0035094	sp|Q4WQ08|ADMB_ASPFU Disintegrin and metalloproteinase domain-containing protein B OS=Neosartorya fumigata (strain ATCC MYA-4609 / Af293 / CBS 101355 / FGSC A1100) GN=ADM-B PE=3 SV=2//0
CADAFLAG00002099	AFLA_027240	2131.58	1445.98	0.55987	0.00035412	sp|O94255|CAN_SCHPO Carbonic anhydrase OS=Schizosaccharomyces pombe (strain 972 / ATCC 24843) GN=SPBP8B7.05c PE=1 SV=2//6.46795e-53
CADAFLAG00002100	AFLA_027250	297.296	523.673	-0.81677	0.0024278	sp|Q9P7U2|YI7E_SCHPO Putative aryl-alcohol dehydrogenase C977.14c OS=Schizosaccharomyces pombe (strain 972 / ATCC 24843) GN=SPAC977.14c PE=1 SV=1//8.89e-129
CADAFLAG00002106	AFLA_027310	1328.69	4104.49	-1.6272	8.0293e-31	sp|P09201|F16P_YEAST Fructose-1,6-bisphosphatase OS=Saccharomyces cerevisiae (strain ATCC 204508 / S288c) GN=FBP1 PE=1 SV=2//1.04355e-117
CADAFLAG00002114	AFLA_027390	1428.67	2222.09	-0.63724	0.00010561	sp|O42932|QCR6_SCHPO Cytochrome b-c1 complex subunit 6 OS=Schizosaccharomyces pombe (strain 972 / ATCC 24843) GN=qcr6 PE=2 SV=1//4.51369e-13
CADAFLAG00002115	AFLA_027400	278.907	146.469	0.92919	0.011798	sp|Q91X85|FLVC2_MOUSE Feline leukemia virus subgroup C receptor-related protein 2 OS=Mus musculus GN=Flvcr2 PE=1 SV=2//1.56949e-08
CADAFLAG00002118	AFLA_027430	1052.34	622.801	0.75676	0.00026867	sp|P40995|SCD1_SCHPO Rho guanine nucleotide exchange factor scd1 OS=Schizosaccharomyces pombe (strain 972 / ATCC 24843) GN=scd1 PE=1 SV=2//7.30652e-63
CADAFLAG00002119	AFLA_027440	1510.53	952.371	0.66546	0.00016566	sp|O67781|AAT_AQUAE Aspartate aminotransferase OS=Aquifex aeolicus (strain VF5) GN=aspC PE=3 SV=1//4.39437e-27
CADAFLAG00002121	AFLA_027460	1703.79	942.155	0.85471	6.5352e-05	sp|Q86TJ5|ZN554_HUMAN Zinc finger protein 554 OS=Homo sapiens GN=ZNF554 PE=2 SV=1//1.78552e-06
CADAFLAG00002123	AFLA_027480	119.629	50.7391	1.2374	0.035672	sp|P71667|NLHH_MYCTU Carboxylesterase NlhH OS=Mycobacterium tuberculosis GN=nlhH PE=1 SV=1//9.70069e-32
CADAFLAG00002128	AFLA_027530	1157.39	2007.76	-0.79471	7.7209e-07	sp|Q63060|GLPK_RAT Glycerol kinase OS=Rattus norvegicus GN=Gk PE=2 SV=1//3.23135e-10
CADAFLAG00002133	AFLA_027580	2712.92	4539.86	-0.7428	7.9178e-08	sp|P00447|SODM_YEAST Superoxide dismutase [Mn], mitochondrial OS=Saccharomyces cerevisiae (strain ATCC 204508 / S288c) GN=SOD2 PE=1 SV=1//1.18954e-61
CADAFLAG00002147	AFLA_027720	6372.08	17796.4	-1.4817	1.3839e-13	sp|O13899|YF38_SCHPO Uncharacterized CDP-alcohol phosphatidyltransferase class-I family protein C22A12.08c OS=Schizosaccharomyces pombe (strain 972 / ATCC 24843) GN=SPAC22A12.08c PE=2 SV=1//1.89216e-62
CADAFLAG00002148	AFLA_027730	5589.43	8807.04	-0.65596	3.6599e-07	sp|Q10494|YDG7_SCHPO Uncharacterized oxidoreductase C26F1.07 OS=Schizosaccharomyces pombe (strain 972 / ATCC 24843) GN=SPAC26F1.07 PE=2 SV=1//1.52429e-71
CADAFLAG00002150	AFLA_027750	364.813	555.686	-0.60711	0.021171	-//-
CADAFLAG00002156	AFLA_027810	16672.9	12797.3	0.38167	0.0035371	sp|P12547|ORYZ_ASPOR Alkaline protease 1 OS=Aspergillus oryzae (strain ATCC 42149 / RIB 40) GN=alp1 PE=1 SV=2//5.86444e-09
CADAFLAG00002175	AFLA_028000	254.913	409.957	-0.68547	0.025963	-//-
CADAFLAG00002185	AFLA_028100	172.594	759.677	-2.138	2.1273e-17	sp|Q9HDX2|YKN3_SCHPO Uncharacterized lactate 2-monooxygenase PB1A11.03 OS=Schizosaccharomyces pombe (strain 972 / ATCC 24843) GN=SPAPB1A11.03 PE=2 SV=1//0
CADAFLAG00002186	AFLA_028110	235.403	618.933	-1.3947	3.1286e-09	sp|Q12627|DLD1_KLULA D-lactate dehydrogenase [cytochrome], mitochondrial OS=Kluyveromyces lactis (strain ATCC 8585 / CBS 2359 / DSM 70799 / NBRC 1267 / NRRL Y-1140 / WM37) GN=DLD1 PE=3 SV=2//8.12635e-147
CADAFLAG00002187	AFLA_028120	14.1748	52.9843	-1.9022	0.04797	-//-
CADAFLAG00002188	AFLA_028130	154.155	409.511	-1.4095	0.00036305	sp|Q10242|GNTK_SCHPO Probable gluconokinase OS=Schizosaccharomyces pombe (strain 972 / ATCC 24843) GN=SPAC4G9.12 PE=2 SV=1//1.31162e-23
CADAFLAG00002198	AFLA_028230	495.931	714.639	-0.52707	0.035927	sp|P30284|CG21_EMENI G2/mitotic-specific cyclin-B OS=Emericella nidulans (strain FGSC A4 / ATCC 38163 / CBS 112.46 / NRRL 194 / M139) GN=nimE PE=2 SV=1//1.37232e-09
CADAFLAG00002206	AFLA_028310	535.319	1003.85	-0.90707	2.5773e-06	-//-
CADAFLAG00002209	AFLA_028340	314.45	844.755	-1.4257	7.0317e-12	-//-
CADAFLAG00002211	AFLA_028360	664.165	383.342	0.79291	0.00071344	-//-
CADAFLAG00002217	AFLA_028420	315.581	756.254	-1.2609	1.0092e-08	sp|Q5B601|Y4029_EMENI Uncharacterized protein AN4029 OS=Emericella nidulans (strain FGSC A4 / ATCC 38163 / CBS 112.46 / NRRL 194 / M139) GN=AN4029 PE=1 SV=1//6.56049e-07
CADAFLAG00002230	AFLA_028550	447.917	678.278	-0.59865	0.012633	sp|Q5QMG3|NFYB2_ORYSJ Nuclear transcription factor Y subunit B-2 OS=Oryza sativa subsp. japonica GN=NFYB2 PE=2 SV=1//6.41927e-46
CADAFLAG00002231	AFLA_028560	513.889	292.15	0.81475	0.0020139	sp|Q06157|AMDR_ASPOR Acetamidase regulatory protein OS=Aspergillus oryzae (strain ATCC 42149 / RIB 40) GN=amdR PE=2 SV=2//0
CADAFLAG00002232	AFLA_028570	151.56	304.411	-1.0061	0.0030517	sp|P41890|SCN1_SCHPO Cut9-interacting protein scn1 OS=Schizosaccharomyces pombe (strain 972 / ATCC 24843) GN=scn1 PE=2 SV=2//2.00305e-66
CADAFLAG00002235	AFLA_028600	468.54	243.632	0.94347	0.00034826	sp|P30666|MCM3_SCHPO DNA replication licensing factor mcm3 OS=Schizosaccharomyces pombe (strain 972 / ATCC 24843) GN=mcm3 PE=1 SV=2//3.98817e-24
CADAFLAG00002239	AFLA_028640	11.9538	51.4796	-2.1065	0.027448	sp|O13820|ERG5_SCHPO Cytochrome P450 61 OS=Schizosaccharomyces pombe (strain 972 / ATCC 24843) GN=erg5 PE=1 SV=3//0
CADAFLAG00002240	AFLA_028650	248.202	440.593	-0.82793	0.0032789	sp|Q12305|RDL1_YEAST Thiosulfate sulfurtransferase RDL1, mitochondrial OS=Saccharomyces cerevisiae (strain ATCC 204508 / S288c) GN=RDL1 PE=1 SV=1//2.54468e-13
CADAFLAG00002249	AFLA_028740	198.563	489.78	-1.3025	6.7205e-07	sp|B2GV06|SCOT1_RAT Succinyl-CoA:3-ketoacid coenzyme A transferase 1, mitochondrial OS=Rattus norvegicus GN=Oxct1 PE=1 SV=1//2.46179e-16
CADAFLAG00002251	AFLA_028760	159.062	64.5524	1.301	0.006272	sp|O94166|CREA_ASPAC DNA-binding protein creA OS=Aspergillus aculeatus GN=creA PE=3 SV=1//5.12014e-12
CADAFLAG00002261	AFLA_028860	456.525	243.95	0.90411	0.0012794	sp|P40896|YJV3_YEAST Uncharacterized protein YJL213W OS=Saccharomyces cerevisiae (strain ATCC 204508 / S288c) GN=YJL213W PE=2 SV=1//3.15693e-79
CADAFLAG00002262	AFLA_028870	292.027	878.775	-1.5894	5.7695e-07	sp|P17174|AATC_HUMAN Aspartate aminotransferase, cytoplasmic OS=Homo sapiens GN=GOT1 PE=1 SV=3//1.3986e-09
CADAFLAG00002264	AFLA_028890	610.3	2119.03	-1.7958	5.8486e-29	sp|P70792|TTUC4_AGRVI Probable tartrate dehydrogenase/decarboxylase TtuC&apos; OS=Agrobacterium vitis GN=ttuC&apos; PE=2 SV=1//1.66422e-161
CADAFLAG00002269	AFLA_028940	358.584	151.7	1.2411	2.6499e-05	sp|Q04500|UTP14_YEAST U3 small nucleolar RNA-associated protein 14 OS=Saccharomyces cerevisiae (strain ATCC 204508 / S288c) GN=UTP14 PE=1 SV=1//2.69033e-11
CADAFLAG00002274	AFLA_028990	4754.02	10601.1	-1.157	7.8482e-21	-//-
CADAFLAG00002275	AFLA_029000	2488.89	5250.98	-1.0771	1.3606e-15	-//-
CADAFLAG00002299	AFLA_029240	333.956	567.405	-0.76472	0.0031208	sp|Q9UUB8|YH9J_SCHPO NifU-like protein C1709.19c OS=Schizosaccharomyces pombe (strain 972 / ATCC 24843) GN=SPBC1709.19c PE=2 SV=1//2.15462e-68
CADAFLAG00002307	AFLA_029320	303.9	493.801	-0.70033	0.013224	sp|Q9P7X3|FRG1_SCHPO Protein frg1 OS=Schizosaccharomyces pombe (strain 972 / ATCC 24843) GN=frg1 PE=2 SV=1//3.62827e-10
CADAFLAG00002314	AFLA_029390	449.642	835.455	-0.89379	2.261e-05	-//-
CADAFLAG00002319	AFLA_029440	1206.13	2169.35	-0.84688	1.0874e-07	sp|Q2UKB8|MCR1_ASPOR NADH-cytochrome b5 reductase 2 OS=Aspergillus oryzae (strain ATCC 42149 / RIB 40) GN=mcr1 PE=3 SV=1//0
CADAFLAG00002326	AFLA_029510	351.59	187.638	0.90594	0.0038603	-//-
CADAFLAG00002329	AFLA_029540	2332.96	3048.17	-0.38578	0.021999	sp|P41909|PXA1_YEAST Peroxisomal long-chain fatty acid import protein 2 OS=Saccharomyces cerevisiae (strain ATCC 204508 / S288c) GN=PXA1 PE=1 SV=2//1.45514e-160
CADAFLAG00002330	AFLA_029550	90.6441	178.586	-0.97833	0.036478	sp|Q9SR79|PPA16_ARATH Probable inactive purple acid phosphatase 16 OS=Arabidopsis thaliana GN=PAP16 PE=2 SV=1//1.11304e-10
CADAFLAG00002335	AFLA_029600	1239.61	2556.44	-1.0443	3.2863e-12	sp|Q2UKD0|XYL1_ASPOR Probable NAD(P)H-dependent D-xylose reductase xyl1 OS=Aspergillus oryzae (strain ATCC 42149 / RIB 40) GN=xyl1 PE=3 SV=1//6.08632e-25
CADAFLAG00002341	AFLA_029660	346.231	107.25	1.6908	3.2e-08	sp|O94469|DUR31_SCHPO Probable urea active transporter 1 OS=Schizosaccharomyces pombe (strain 972 / ATCC 24843) GN=dur3-1 PE=2 SV=1//2.57541e-26
CADAFLAG00002353	AFLA_029780	201.243	415.905	-1.0473	0.00037462	sp|Q2UKE6|PLPL_ASPOR Patatin-like phospholipase domain-containing protein AO090003000839 OS=Aspergillus oryzae (strain ATCC 42149 / RIB 40) GN=AO090003000839 PE=3 SV=1//0
CADAFLAG00002360	AFLA_029850	94.2029	2761.85	-4.8737	1.715e-129	-//-
CADAFLAG00002370	AFLA_029950	494.638	286.33	0.78869	0.0027341	sp|Q9USW3|YHZ7_SCHPO Probable glycosidase C21B10.07 OS=Schizosaccharomyces pombe (strain 972 / ATCC 24843) GN=SPBC21B10.07 PE=2 SV=1//8.71664e-11
CADAFLAG00002393	AFLA_030180	1919.64	1359.74	0.49751	0.0038243	sp|O74752|MAS5_SCHPO Mitochondrial protein import protein mas5 OS=Schizosaccharomyces pombe (strain 972 / ATCC 24843) GN=mas5 PE=2 SV=1//7.07276e-142
CADAFLAG00002403	AFLA_030280	187.759	370.069	-0.97891	0.016029	sp|Q00684|CDC14_YEAST Tyrosine-protein phosphatase CDC14 OS=Saccharomyces cerevisiae (strain ATCC 204508 / S288c) GN=CDC14 PE=1 SV=2//9.04534e-145
CADAFLAG00002420	AFLA_030450	1395.94	3024.78	-1.1156	2.1747e-14	sp|A6YRN9|TREPH_PLEPU Trehalose phosphorylase OS=Pleurotus pulmonarius GN=TP PE=2 SV=1//1.40718e-06
CADAFLAG00002422	AFLA_030470	162.965	62.554	1.3814	0.003639	sp|P42318|YXJG_BACSU Uncharacterized protein YxjG OS=Bacillus subtilis (strain 168) GN=yxjG PE=4 SV=3//8.9048e-08
CADAFLAG00002426	AFLA_030510	90.6566	33.9163	1.4184	0.048045	-//-
CADAFLAG00002428	AFLA_030530	504.551	324.514	0.63672	0.020493	sp|P40467|ASG1_YEAST Activator of stress genes 1 OS=Saccharomyces cerevisiae (strain ATCC 204508 / S288c) GN=ASG1 PE=1 SV=1//1.69515e-18
CADAFLAG00002439	AFLA_030640	1353.78	3399.84	-1.3285	1.6814e-20	sp|P77376|YDGJ_ECOLI Uncharacterized oxidoreductase YdgJ OS=Escherichia coli (strain K12) GN=ydgJ PE=1 SV=2//2.76526e-06
CADAFLAG00002440	AFLA_030650	1482.19	3566.94	-1.267	7.0711e-19	sp|Q5BD77|HOGA1_EMENI Probable 4-hydroxy-2-oxoglutarate aldolase, mitochondrial OS=Emericella nidulans (strain FGSC A4 / ATCC 38163 / CBS 112.46 / NRRL 194 / M139) GN=AN1503 PE=1 SV=1//2.70039e-84
CADAFLAG00002441	AFLA_030660	1283.88	2439.13	-0.92586	2.2282e-09	sp|Q04894|ADH6_YEAST NADP-dependent alcohol dehydrogenase 6 OS=Saccharomyces cerevisiae (strain ATCC 204508 / S288c) GN=ADH6 PE=1 SV=1//7.91866e-115
CADAFLAG00002442	AFLA_030670	493.133	311.218	0.66405	0.017282	sp|Q91854|TRCB_XENLA Beta-TrCP OS=Xenopus laevis GN=fbxw1 PE=2 SV=1//1.5511e-44
CADAFLAG00002463	AFLA_030880	860.422	424.487	1.0193	3.3486e-07	-//-
CADAFLAG00002464	AFLA_030890	1014.77	1356.88	-0.41914	0.046894	sp|Q870G1|LYS1_EMENI Saccharopine dehydrogenase [NAD(+), L-lysine-forming] OS=Emericella nidulans (strain FGSC A4 / ATCC 38163 / CBS 112.46 / NRRL 194 / M139) GN=lysA PE=3 SV=2//0
CADAFLAG00002468	AFLA_030930	10167.9	16919	-0.73463	1.0591e-09	sp|Q9HGY9|ALF_ASPOR Fructose-bisphosphate aldolase OS=Aspergillus oryzae (strain ATCC 42149 / RIB 40) GN=fbaA PE=2 SV=2//0
CADAFLAG00002474	AFLA_030990	861.532	548.902	0.65036	0.0030179	-//-
CADAFLAG00002475	AFLA_031000	2898.04	3939.5	-0.44293	0.0043309	sp|Q4WY33|NHP6_ASPFU Non-histone chromosomal protein 6 OS=Neosartorya fumigata (strain ATCC MYA-4609 / Af293 / CBS 101355 / FGSC A1100) GN=nhp6 PE=3 SV=1//3.30578e-14
CADAFLAG00002481	AFLA_031060	101.928	238.178	-1.2245	0.012101	sp|O14158|YE76_SCHPO AB hydrolase superfamily protein C4A8.06c OS=Schizosaccharomyces pombe (strain 972 / ATCC 24843) GN=SPAC4A8.06c PE=2 SV=1//1.99504e-09
CADAFLAG00002484	AFLA_031090	1760.09	11012	-2.6454	5.4417e-11	sp|Q8SVY9|Y3G1_ENCCU Uncharacterized protein ECU03_1610 OS=Encephalitozoon cuniculi (strain GB-M1) GN=ECU03_1610 PE=1 SV=1//2.97737e-06
CADAFLAG00002495	AFLA_031200	667.429	1119.61	-0.74631	8.8364e-05	sp|Q12611|ARGI_EMENI Arginase OS=Emericella nidulans (strain FGSC A4 / ATCC 38163 / CBS 112.46 / NRRL 194 / M139) GN=agaA PE=3 SV=2//0
CADAFLAG00002500	AFLA_031250	6253.32	9110.62	-0.54293	2.9262e-05	sp|O42630|CARP_ASPFU Vacuolar protease A OS=Neosartorya fumigata (strain ATCC MYA-4609 / Af293 / CBS 101355 / FGSC A1100) GN=pep2 PE=2 SV=1//1.03608e-18
CADAFLAG00002508	AFLA_031330	249.033	718.74	-1.5291	0.0034812	-//-
CADAFLAG00002509	AFLA_031340	1228.31	1883.51	-0.61675	0.00020789	sp|P52890|ATF1_SCHPO Transcription factor atf1 OS=Schizosaccharomyces pombe (strain 972 / ATCC 24843) GN=atf1 PE=1 SV=1//7.31924e-30
CADAFLAG00002515	AFLA_031400	330.356	559.483	-0.76007	0.015448	sp|O14258|ACE2_SCHPO Metallothionein expression activator OS=Schizosaccharomyces pombe (strain 972 / ATCC 24843) GN=ace2 PE=2 SV=1//3.52567e-30
CADAFLAG00002520	AFLA_031450	303.459	456.453	-0.58896	0.048275	sp|Q5M7R9|GRHL2_XENTR Grainyhead-like protein 2 homolog OS=Xenopus tropicalis GN=grhl2 PE=2 SV=1//3.99346e-15
CADAFLAG00002532	AFLA_031570	844.066	1660.33	-0.97604	6.2838e-09	sp|Q2UKV4|PDC_ASPOR Pyruvate decarboxylase OS=Aspergillus oryzae (strain ATCC 42149 / RIB 40) GN=pdcA PE=3 SV=1//1.51425e-08
CADAFLAG00002553	AFLA_031780	5355.76	7762.63	-0.53545	5.5263e-05	-//-
CADAFLAG00002562	AFLA_031870	352.353	1141.15	-1.6954	5.1336e-19	-//-
CADAFLAG00002565	AFLA_031900	527.557	1505.15	-1.5125	2.398e-18	sp|O74770|PHK_SCHPO Probable phosphoketolase OS=Schizosaccharomyces pombe (strain 972 / ATCC 24843) GN=SPBC24C6.09c PE=2 SV=1//1.63054e-19
CADAFLAG00002566	AFLA_031910	339.07	1061.11	-1.6459	2.1767e-07	sp|Q7SH17|ACKA_NEUCR Probable acetate kinase OS=Neurospora crassa (strain ATCC 24698 / 74-OR23-1A / CBS 708.71 / DSM 1257 / FGSC 987) GN=B12J7.040 PE=3 SV=3//1.64087e-164
CADAFLAG00002591	AFLA_032160	1311.36	3346.89	-1.3518	1.0642e-20	sp|P66782|Y1385_MYCBO Uncharacterized oxidoreductase Mb1385 OS=Mycobacterium bovis (strain ATCC BAA-935 / AF2122/97) GN=fabG2 PE=3 SV=1//3.56983e-30
CADAFLAG00002592	AFLA_032170	2163.65	1215.71	0.83167	0.0013845	sp|P08092|RAN1_SCHPO Negative regulator of sexual conjugation and meiosis OS=Schizosaccharomyces pombe (strain 972 / ATCC 24843) GN=ran1 PE=1 SV=2//1.75132e-22
CADAFLAG00002596	AFLA_032210	780.322	517.772	0.59175	0.013659	-//-
CADAFLAG00002598	AFLA_032230	1342.88	5740.63	-2.0959	7.0715e-53	sp|O94559|YF65_SCHPO Uncharacterized protein C23C4.05c OS=Schizosaccharomyces pombe (strain 972 / ATCC 24843) GN=SPAC23C4.05c PE=2 SV=1//7.5628e-11
CADAFLAG00002604	AFLA_032290	539.654	1162.91	-1.1076	4.0109e-09	-//-
CADAFLAG00002608	AFLA_032330	258.902	445.108	-0.78175	0.0063586	-//-
CADAFLAG00002620	AFLA_032450	145.885	59.2977	1.2988	0.013427	sp|Q08268|MCH4_YEAST Probable transporter MCH4 OS=Saccharomyces cerevisiae (strain ATCC 204508 / S288c) GN=MCH4 PE=1 SV=1//1.18531e-46
CADAFLAG00002621	AFLA_032460	201.205	99.7504	1.0123	0.024928	sp|A6W572|UPP_KINRD Uracil phosphoribosyltransferase OS=Kineococcus radiotolerans (strain ATCC BAA-149 / DSM 14245 / SRS30216) GN=upp PE=3 SV=1//1.82607e-10
CADAFLAG00002625	AFLA_032500	556.579	818.163	-0.5558	0.014873	sp|P07342|ILVB_YEAST Acetolactate synthase catalytic subunit, mitochondrial OS=Saccharomyces cerevisiae (strain ATCC 204508 / S288c) GN=ILV2 PE=1 SV=1//1.21217e-169
CADAFLAG00002633	AFLA_032580	326.964	632.029	-0.95086	4.5361e-05	sp|Q10199|IMP2_SCHPO Septation protein imp2 OS=Schizosaccharomyces pombe (strain 972 / ATCC 24843) GN=imp2 PE=1 SV=1//4.80368e-07
CADAFLAG00002640	AFLA_032650	637.394	935.851	-0.55409	0.014505	sp|P78723|PEX14_PICAN Peroxisomal membrane protein PER10 OS=Pichia angusta GN=PEX14 PE=3 SV=1//7.09288e-13
CADAFLAG00002642	AFLA_032670	5740.06	2175.59	1.3997	1.5797e-31	-//-
CADAFLAG00002646	AFLA_032710	627.67	389.878	0.68698	0.0058447	-//-
CADAFLAG00002651	AFLA_032760	2387.59	1752.68	0.44599	0.0088016	sp|P78814|SRP2_SCHPO Pre-mRNA-splicing factor srp2 OS=Schizosaccharomyces pombe (strain 972 / ATCC 24843) GN=srp2 PE=1 SV=2//2.12769e-26
CADAFLAG00002652	AFLA_032770	462.833	900.35	-0.95999	1.6133e-06	sp|P29251|FOL1_PNECA Folic acid synthesis protein fol1 OS=Pneumocystis carinii GN=fol1 PE=1 SV=1//4.08547e-16
CADAFLAG00002664	AFLA_032890	2998.5	5790.86	-0.94954	3.8808e-13	sp|A6ZRR2|MDG1_YEAS7 Signal transduction protein MDG1 OS=Saccharomyces cerevisiae (strain YJM789) GN=MDG1 PE=3 SV=1//5.41127e-08
CADAFLAG00002671	AFLA_032960	40.1816	5.52533	2.8624	0.022835	sp|P40445|YIQ6_YEAST Uncharacterized transporter YIL166C OS=Saccharomyces cerevisiae (strain ATCC 204508 / S288c) GN=YIL166C PE=1 SV=1//2.10474e-143
CADAFLAG00002679	AFLA_033040	240.613	387.362	-0.68697	0.027507	-//-
CADAFLAG00002683	AFLA_033080	495.035	790.958	-0.67607	0.0029903	sp|O94611|MUG65_SCHPO Meiotically up-regulated gene 65 protein OS=Schizosaccharomyces pombe (strain 972 / ATCC 24843) GN=mug65 PE=1 SV=2//4.25759e-35
CADAFLAG00002687	AFLA_033120	1090.06	1930.9	-0.82486	3.5866e-07	sp|Q07451|YET3_YEAST Endoplasmic reticulum transmembrane protein 3 OS=Saccharomyces cerevisiae (strain ATCC 204508 / S288c) GN=YET3 PE=1 SV=1//1.76857e-11
CADAFLAG00002693	AFLA_033180	199.926	566.219	-1.5019	6.3297e-10	sp|P78972|SLP1_SCHPO WD repeat-containing protein slp1 OS=Schizosaccharomyces pombe (strain 972 / ATCC 24843) GN=slp1 PE=1 SV=1//6.69845e-158
CADAFLAG00002718	AFLA_033430	536.216	978.525	-0.86779	2.1264e-05	sp|Q9RPT1|RHLG_PSEAE Rhamnolipids biosynthesis 3-oxoacyl-[acyl-carrier-protein] reductase OS=Pseudomonas aeruginosa (strain ATCC 15692 / PAO1 / 1C / PRS 101 / LMG 12228) GN=rhlG PE=1 SV=1//9.61032e-46
CADAFLAG00002720	AFLA_033450	42.433	331.615	-2.9663	2.4257e-17	sp|O07622|YHFW_BACSU Putative Rieske 2Fe-2S iron-sulfur protein YhfW OS=Bacillus subtilis (strain 168) GN=yhfW PE=3 SV=1//2.30551e-44
CADAFLAG00002725	AFLA_033500	2293.97	982.29	1.2236	1.6501e-15	sp|O69787|BETC_RHIME Choline-sulfatase OS=Rhizobium meliloti (strain 1021) GN=betC PE=1 SV=2//2.01721e-40
CADAFLAG00002737	AFLA_033620	1824.79	6248.24	-1.7757	2.3551e-10	-//-
CADAFLAG00002750	AFLA_033750	226.873	80.3642	1.4973	6.9237e-05	sp|Q9UA35|S28A3_EPTST Solute carrier family 28 member 3 OS=Eptatretus stoutii GN=SLC28A3 PE=2 SV=1//2.4976e-87
CADAFLAG00002754	AFLA_033790	260.951	408.899	-0.64796	0.04701	sp|Q8TG90|RIB3_MAGO7 3,4-dihydroxy-2-butanone 4-phosphate synthase OS=Magnaporthe oryzae (strain 70-15 / ATCC MYA-4617 / FGSC 8958) GN=RIB3 PE=1 SV=1//1.65097e-09
CADAFLAG00002770	AFLA_033950	117.072	260.503	-1.1539	0.0010426	sp|Q03034|FDC1_YEAST Ferulic acid decarboxylase 1 OS=Saccharomyces cerevisiae (strain ATCC 204508 / S288c) GN=FDC1 PE=1 SV=1//7.04985e-129
CADAFLAG00002771	AFLA_033960	32.0965	122.051	-1.927	0.00042114	sp|P33751|PAD1_YEAST Phenylacrylic acid decarboxylase OS=Saccharomyces cerevisiae (strain ATCC 204508 / S288c) GN=PAD1 PE=1 SV=2//3.29423e-82
CADAFLAG00002778	AFLA_034030	717.956	1410.66	-0.9744	3.3649e-08	sp|Q00075|TPSA_ASPNG Alpha,alpha-trehalose-phosphate synthase [UDP-forming] 1 OS=Aspergillus niger GN=tpsA PE=3 SV=1//1.8633e-06
CADAFLAG00002780	AFLA_034050	7260.61	10009.1	-0.46315	0.0093165	sp|P19414|ACON_YEAST Aconitate hydratase, mitochondrial OS=Saccharomyces cerevisiae (strain ATCC 204508 / S288c) GN=ACO1 PE=1 SV=2//1.27233e-93
CADAFLAG00002787	AFLA_034120	830.417	1152.83	-0.47328	0.029842	sp|P87145|VAC14_SCHPO Protein VAC14 homolog OS=Schizosaccharomyces pombe (strain 972 / ATCC 24843) GN=SPBC25H2.03 PE=2 SV=1//1.71844e-34
CADAFLAG00002788	AFLA_034130	299.323	491.309	-0.71493	0.011257	sp|B8N219|AIM24_ASPFN Altered inheritance of mitochondria protein 24, mitochondrial OS=Aspergillus flavus (strain ATCC 200026 / FGSC A1120 / NRRL 3357 / JCM 12722 / SRRC 167) GN=aim24 PE=3 SV=1//0
CADAFLAG00002790	AFLA_034150	105.272	219.779	-1.0619	0.008662	sp|Q5REP4|KIF22_PONAB Kinesin-like protein KIF22 OS=Pongo abelii GN=KIF22 PE=2 SV=1//2.04047e-19
CADAFLAG00002793	AFLA_034180	120.831	245.678	-1.0238	0.0058249	sp|P87214|HEM4_SCHPO Uroporphyrinogen-III synthase OS=Schizosaccharomyces pombe (strain 972 / ATCC 24843) GN=ups1 PE=2 SV=1//2.28306e-16
CADAFLAG00002795	AFLA_034200	179.508	419.702	-1.2253	1.4473e-05	sp|O94628|YGE9_SCHPO Uncharacterized methyltransferase C1347.09 OS=Schizosaccharomyces pombe (strain 972 / ATCC 24843) GN=SPBC1347.09 PE=2 SV=1//3.90093e-07
CADAFLAG00002800	AFLA_034250	577.111	1208.46	-1.0663	6.804e-09	sp|O59714|YBH6_SCHPO Uncharacterized membrane protein C3B8.06 OS=Schizosaccharomyces pombe (strain 972 / ATCC 24843) GN=SPBC3B8.06 PE=1 SV=1//1.99063e-45
CADAFLAG00002829	AFLA_034540	731.077	473.745	0.62591	0.0073565	sp|O14283|PRR1_SCHPO Transcription factor prr1 OS=Schizosaccharomyces pombe (strain 972 / ATCC 24843) GN=prr1 PE=1 SV=2//1.43859e-10
CADAFLAG00002845	AFLA_034700	796.327	506.451	0.65294	0.0040492	-//-
CADAFLAG00002856	AFLA_034810	120.873	43.4859	1.4749	0.049321	-//-
CADAFLAG00002864	AFLA_034890	246.76	1346.75	-2.4483	2.6545e-34	sp|P49374|HGT1_KLULA High-affinity glucose transporter OS=Kluyveromyces lactis (strain ATCC 8585 / CBS 2359 / DSM 70799 / NBRC 1267 / NRRL Y-1140 / WM37) GN=HGT1 PE=3 SV=1//5.55115e-11
CADAFLAG00002866	AFLA_034910	563.232	879.164	-0.6424	0.0028984	-//-
CADAFLAG00002870	AFLA_034950	2902.85	3780.42	-0.38108	0.017381	sp|P36914|AMYG_ASPOR Glucoamylase OS=Aspergillus oryzae (strain ATCC 42149 / RIB 40) GN=glaA PE=2 SV=2//0
CADAFLAG00002882	AFLA_035070	76.1953	185.616	-1.2845	0.0030177	sp|O74180|AOX_ASPNG Alternative oxidase, mitochondrial OS=Aspergillus niger GN=aox1 PE=2 SV=2//3.54485e-31
CADAFLAG00002883	AFLA_035080	69.3442	151.453	-1.127	0.02782	sp|Q00922|ALOX_CANBO Alcohol oxidase OS=Candida boidinii GN=AOD1 PE=1 SV=1//2.30911e-106
CADAFLAG00002884	AFLA_035090	180.984	305.151	-0.75367	0.042748	-//-
CADAFLAG00002897	AFLA_035220	125.073	235.32	-0.91186	0.028187	-//-
CADAFLAG00002899	AFLA_035240	713.824	994.902	-0.47899	0.038479	sp|P25043|PSB2_YEAST Proteasome subunit beta type-2 OS=Saccharomyces cerevisiae (strain ATCC 204508 / S288c) GN=PUP1 PE=1 SV=1//9.61032e-123
CADAFLAG00002904	AFLA_035290	466.403	983.709	-1.0767	0.012951	sp|P16387|ODPA_YEAST Pyruvate dehydrogenase E1 component subunit alpha, mitochondrial OS=Saccharomyces cerevisiae (strain ATCC 204508 / S288c) GN=PDA1 PE=1 SV=2//1.19024e-56
CADAFLAG00002918	AFLA_035430	34.5002	208.458	-2.5951	1.3873e-10	sp|P50842|KDUD_BACSU 2-dehydro-3-deoxy-D-gluconate 5-dehydrogenase OS=Bacillus subtilis (strain 168) GN=kduD PE=2 SV=1//1.91145e-48
CADAFLAG00002919	AFLA_035440	126.798	522.932	-2.0441	2.6094e-15	sp|A6TFZ4|DGOD_KLEP7 D-galactonate dehydratase OS=Klebsiella pneumoniae subsp. pneumoniae (strain ATCC 700721 / MGH 78578) GN=dgoD PE=3 SV=1//9.891e-22
CADAFLAG00002936	AFLA_035610	144.836	270.518	-0.90131	0.014294	sp|C1F3M3|Y1015_ACIC5 UPF0303 protein ACP_1015 OS=Acidobacterium capsulatum (strain ATCC 51196 / DSM 11244 / JCM 7670) GN=ACP_1015 PE=3 SV=1//1.83813e-12
CADAFLAG00002938	AFLA_035630	83.0784	18.5982	2.1593	0.0036523	-//-
CADAFLAG00002940	AFLA_035650	1516.98	802.973	0.91778	1.6499e-08	sp|O13820|ERG5_SCHPO Cytochrome P450 61 OS=Schizosaccharomyces pombe (strain 972 / ATCC 24843) GN=erg5 PE=1 SV=3//8.6279e-11
CADAFLAG00002943	AFLA_035680	94.855	375.229	-1.984	3.9218e-11	sp|P53750|YN93_YEAST Uncharacterized hydrolase YNR064C OS=Saccharomyces cerevisiae (strain ATCC 204508 / S288c) GN=YNR064C PE=2 SV=1//6.8377e-88
CADAFLAG00002946	AFLA_035710	281.946	707.338	-1.327	2.6626e-09	sp|Q5ZID0|NMRL1_CHICK NmrA-like family domain-containing protein 1 OS=Gallus gallus GN=NMRAL1 PE=2 SV=1//1.97867e-20
CADAFLAG00002948	AFLA_035730	1917.65	976.622	0.97347	2.0249e-10	-//-
CADAFLAG00002955	AFLA_035800	380.675	216.005	0.81749	0.0068852	sp|P45796|XYND_PAEPO Arabinoxylan arabinofuranohydrolase OS=Paenibacillus polymyxa GN=xynD PE=1 SV=1//6.25503e-11
CADAFLAG00002970	AFLA_035950	641.517	446.589	0.52254	0.045631	-//-
CADAFLAG00002973	AFLA_035980	859.677	1281.42	-0.57588	0.0020037	-//-
CADAFLAG00002983	AFLA_036080	563.697	821.101	-0.54264	0.021871	sp|Q00770|FAAA_EMENI Fumarylacetoacetase OS=Emericella nidulans (strain FGSC A4 / ATCC 38163 / CBS 112.46 / NRRL 194 / M139) GN=fahA PE=1 SV=3//0
CADAFLAG00002987	AFLA_036120	238.84	442.767	-0.89051	0.021445	sp|O60140|YNS9_SCHPO Uncharacterized protein C18H10.09 OS=Schizosaccharomyces pombe (strain 972 / ATCC 24843) GN=SPBC18H10.09 PE=2 SV=2//7.67106e-44
CADAFLAG00003002	AFLA_036270	2494.34	1942.54	0.36072	0.048373	sp|Q9UUE6|SYKC_SCHPO Lysine--tRNA ligase, cytoplasmic OS=Schizosaccharomyces pombe (strain 972 / ATCC 24843) GN=krs1 PE=2 SV=1//0
CADAFLAG00003007	AFLA_036320	162.494	287.389	-0.82262	0.018504	sp|Q10361|ETP1_SCHPO Electron transfer protein 1, mitochondrial OS=Schizosaccharomyces pombe (strain 972 / ATCC 24843) GN=etp1 PE=1 SV=2//2.04098e-107
CADAFLAG00003012	AFLA_036370	16532.4	33803.5	-1.0319	1.1447e-10	sp|Q96UL8|PCKA_EMENI Phosphoenolpyruvate carboxykinase [ATP] OS=Emericella nidulans (strain FGSC A4 / ATCC 38163 / CBS 112.46 / NRRL 194 / M139) GN=acuF PE=3 SV=3//1.21914e-51
CADAFLAG00003017	AFLA_036420	346.05	164.056	1.0768	0.0006456	sp|O94342|YHM9_SCHPO Probable metabolite transport protein C1271.09 OS=Schizosaccharomyces pombe (strain 972 / ATCC 24843) GN=SPBC1271.09 PE=2 SV=1//2.23275e-68
CADAFLAG00003019	AFLA_036440	992.088	1481.89	-0.5789	0.0011403	sp|P52893|ALAM_YEAST Probable alanine aminotransferase, mitochondrial OS=Saccharomyces cerevisiae (strain ATCC 204508 / S288c) GN=ALT1 PE=1 SV=1//3.75102e-177
CADAFLAG00003026	AFLA_036510	471.753	898.821	-0.93	3.7997e-06	sp|Q9M0Z6|MSRB3_ARATH Peptide methionine sulfoxide reductase B3 OS=Arabidopsis thaliana GN=MSRB3 PE=2 SV=2//4.34903e-50
CADAFLAG00003038	AFLA_036630	2754.54	2154.5	0.35446	0.046062	sp|B8N4G0|CRED_ASPFN Probable HECT-type ubiquitin ligase-interacting protein creD OS=Aspergillus flavus (strain ATCC 200026 / FGSC A1120 / NRRL 3357 / JCM 12722 / SRRC 167) GN=creD PE=3 SV=1//0
CADAFLAG00003039	AFLA_036640	1009.51	1725.03	-0.77296	2.9147e-06	sp|O94447|YFED_SCHPO Uncharacterized PH domain-containing protein C637.13c OS=Schizosaccharomyces pombe (strain 972 / ATCC 24843) GN=SPAC637.13c PE=1 SV=1//1.65838e-41
CADAFLAG00003041	AFLA_036660	2297.52	3273.74	-0.51087	0.00083754	sp|Q09751|LGUL_SCHPO Lactoylglutathione lyase OS=Schizosaccharomyces pombe (strain 972 / ATCC 24843) GN=glo1 PE=1 SV=1//1.14072e-44
CADAFLAG00003054	AFLA_036800	297.65	925.589	-1.6368	1.4243e-15	sp|Q8T675|ABCGJ_DICDI ABC transporter G family member 19 OS=Dictyostelium discoideum GN=abcG19 PE=3 SV=1//5.1823e-11
CADAFLAG00003055	AFLA_036810	105.985	24.6172	2.1061	0.00063031	-//-
CADAFLAG00003074	AFLA_037000	253.532	396.661	-0.64574	0.039853	sp|P30303|MPIP_EMENI M-phase inducer phosphatase OS=Emericella nidulans (strain FGSC A4 / ATCC 38163 / CBS 112.46 / NRRL 194 / M139) GN=nimT PE=2 SV=2//0
CADAFLAG00003079	AFLA_037050	271.631	125.108	1.1185	0.0017116	sp|O60055|UTP20_SCHPO U3 small nucleolar RNA-associated protein 20 OS=Schizosaccharomyces pombe (strain 972 / ATCC 24843) GN=utp20 PE=2 SV=1//4.30592e-46
CADAFLAG00003081	AFLA_037070	412.562	255.447	0.69159	0.022205	-//-
CADAFLAG00003099	AFLA_037260	585.386	279.571	1.0662	6.6052e-06	sp|P15325|QUTD_EMENI Quinate permease OS=Emericella nidulans (strain FGSC A4 / ATCC 38163 / CBS 112.46 / NRRL 194 / M139) GN=qutD PE=1 SV=2//6.68023e-89
CADAFLAG00003115	AFLA_037420	218.982	447.353	-1.0306	0.00018372	sp|O13911|PNK1_SCHPO Bifunctional polynucleotide phosphatase/kinase OS=Schizosaccharomyces pombe (strain 972 / ATCC 24843) GN=pnk1 PE=1 SV=2//2.16235e-36
CADAFLAG00003116	AFLA_037430	91.3391	214.994	-1.235	0.0020161	sp|O13911|PNK1_SCHPO Bifunctional polynucleotide phosphatase/kinase OS=Schizosaccharomyces pombe (strain 972 / ATCC 24843) GN=pnk1 PE=1 SV=2//2.87388e-17
CADAFLAG00003118	AFLA_037450	249.431	429.097	-0.78266	0.012124	sp|B8N4P0|P20D2_ASPFN Probable carboxypeptidase AFLA_037450 OS=Aspergillus flavus (strain ATCC 200026 / FGSC A1120 / NRRL 3357 / JCM 12722 / SRRC 167) GN=AFLA_037450 PE=3 SV=1//0
CADAFLAG00003121	AFLA_037480	8300.79	10949.1	-0.39949	0.0039976	sp|Q12560|ENO_ASPOR Enolase OS=Aspergillus oryzae (strain ATCC 42149 / RIB 40) GN=enoA PE=2 SV=1//0
CADAFLAG00003130	AFLA_037570	593.152	1043.98	-0.81563	2.5238e-05	-//-
CADAFLAG00003132	AFLA_037590	117.786	258.528	-1.1341	0.016037	-//-
CADAFLAG00003135	AFLA_037620	245.08	1013.32	-2.0478	1.5145e-24	-//-
CADAFLAG00003151	AFLA_037780	1742.03	2412.05	-0.46949	0.0061194	sp|P78774|ARPC1_SCHPO Actin-related protein 2/3 complex subunit 1 OS=Schizosaccharomyces pombe (strain 972 / ATCC 24843) GN=arc1 PE=1 SV=3//2.86354e-06
CADAFLAG00003176	AFLA_012910	535.364	317.332	0.75453	0.017946	sp|P0CD99|MPH2_YEAST Alpha-glucosides permease MPH2 OS=Saccharomyces cerevisiae (strain ATCC 204508 / S288c) GN=MPH2 PE=2 SV=1//5.89701e-13
CADAFLAG00003200	AFLA_013150	56.468	10.0396	2.4917	0.0072889	-//-
CADAFLAG00003203	AFLA_013180	8982.88	1918.46	2.2272	1.0927e-85	sp|Q8N6F8|WBS27_HUMAN Williams-Beuren syndrome chromosomal region 27 protein OS=Homo sapiens GN=WBSCR27 PE=2 SV=2//4.04562e-14
CADAFLAG00003208	AFLA_013230	1704.57	3943.02	-1.2099	5.4549e-18	sp|Q937L5|CPNB_COMTE Cyclopentanone 1,2-monooxygenase OS=Comamonas testosteroni GN=cpnB PE=3 SV=3//4.30779e-161
CADAFLAG00003211	AFLA_013260	115.223	220.074	-0.93355	0.018442	-//-
CADAFLAG00003212	AFLA_013270	133.161	539.707	-2.019	1.2369e-06	sp|P94502|YRDN_BACSU Probable tautomerase YrdN OS=Bacillus subtilis (strain 168) GN=yrdN PE=3 SV=3//2.84026e-22
CADAFLAG00003215	AFLA_013300	1105.84	710.475	0.63829	0.0033237	sp|Q01284|2NPD_NEUCR Nitronate monooxygenase OS=Neurospora crassa (strain ATCC 24698 / 74-OR23-1A / CBS 708.71 / DSM 1257 / FGSC 987) GN=ncd-2 PE=1 SV=1//3.67047e-28
CADAFLAG00003217	AFLA_013320	184.306	548.043	-1.5722	4.5043e-10	sp|P23548|GUN_PAEPO Endoglucanase OS=Paenibacillus polymyxa PE=3 SV=2//3.56106e-08
CADAFLAG00003221	AFLA_013360	688.397	941.026	-0.45099	0.046357	-//-
CADAFLAG00003229	AFLA_013440	103.68	276.314	-1.4142	3.4537e-05	-//-
CADAFLAG00003237	AFLA_013520	194.707	66.3278	1.5536	0.00026385	sp|O13345|ORDA_ASPPA O-methylsterigmatocystin oxidoreductase OS=Aspergillus parasiticus GN=ordA PE=3 SV=1//5.14329e-07
CADAFLAG00003253	AFLA_013680	64.6803	6.28959	3.3623	0.00045365	sp|Q9RGS8|PHLN_BURPS Non-hemolytic phospholipase C OS=Burkholderia pseudomallei (strain K96243) GN=plcN PE=1 SV=2//7.43526e-14
CADAFLAG00003254	AFLA_013690	1400.4	876.824	0.67548	8.7344e-05	sp|Q92197|CHSC_ASPFU Chitin synthase C OS=Neosartorya fumigata (strain ATCC MYA-4609 / Af293 / CBS 101355 / FGSC A1100) GN=chsC PE=3 SV=2//4.32749e-15
CADAFLAG00003260	AFLA_013750	172.306	1066.41	-2.6297	4.2648e-20	-//-
CADAFLAG00003261	AFLA_013760	692.985	1578.26	-1.1874	2.0485e-12	sp|O14405|GUN4_HYPJE Endoglucanase-4 OS=Hypocrea jecorina GN=cel61a PE=1 SV=1//1.23913e-85
CADAFLAG00003262	AFLA_013770	438.041	3578.54	-3.0302	1.4557e-90	-//-
CADAFLAG00003263	AFLA_013780	292.413	2867.1	-3.2935	9.9788e-81	-//-
CADAFLAG00003273	AFLA_013880	39.1624	147.186	-1.9101	7.1595e-05	sp|Q9P8W1|LIP4_CANAL Lipase 4 OS=Candida albicans (strain SC5314 / ATCC MYA-2876) GN=LIP4 PE=3 SV=1//5.75388e-60
CADAFLAG00003295	AFLA_014100	2226.71	4084.79	-0.87535	4.6168e-10	sp|Q7S6U4|CVNH_NEUCR Cyanovirin-N homolog OS=Neurospora crassa (strain ATCC 24698 / 74-OR23-1A / CBS 708.71 / DSM 1257 / FGSC 987) GN=NCU05495 PE=1 SV=2//2.21169e-11
CADAFLAG00003296	AFLA_014110	285.976	141.119	1.019	0.0021065	-//-
CADAFLAG00003304	AFLA_014190	306.911	5.77217	5.7326	8.8474e-30	sp|B8N5S6|BGLM_ASPFN Probable beta-glucosidase M OS=Aspergillus flavus (strain ATCC 200026 / FGSC A1120 / NRRL 3357 / JCM 12722 / SRRC 167) GN=bglM PE=3 SV=1//2.51769e-17
CADAFLAG00003308	AFLA_014230	932.455	1329.9	-0.51221	0.012294	sp|O14111|PSD3_SCHPO Phosphatidylserine decarboxylase proenzyme 3 OS=Schizosaccharomyces pombe (strain 972 / ATCC 24843) GN=psd3 PE=2 SV=2//7.78145e-40
CADAFLAG00003326	AFLA_014410	67.6142	146.939	-1.1198	0.026977	-//-
CADAFLAG00003335	AFLA_014500	328.818	797.272	-1.2778	1.9991e-09	sp|O13621|YNG5_SCHPO Uncharacterized protein C691.05c OS=Schizosaccharomyces pombe (strain 972 / ATCC 24843) GN=pi030 PE=2 SV=1//1.22828e-06
CADAFLAG00003336	AFLA_014510	259.48	100.467	1.3689	0.00010382	sp|Q50568|FDHC_METTF Probable formate transporter OS=Methanobacterium thermoformicicum GN=fdhC PE=3 SV=1//2.93716e-21
CADAFLAG00003342	AFLA_014570	8726.45	16014.9	-0.87595	2.7434e-07	-//-
CADAFLAG00003347	AFLA_014620	151.219	59.2977	1.3506	0.0078972	-//-
CADAFLAG00003350	AFLA_014650	245.703	404.878	-0.72057	0.022835	sp|P24871|CG24_YEAST G2/mitotic-specific cyclin-4 OS=Saccharomyces cerevisiae (strain ATCC 204508 / S288c) GN=CLB4 PE=1 SV=2//2.13136e-98
CADAFLAG00003358	AFLA_014730	505.103	801.762	-0.6666	0.0032784	sp|P87125|URED_SCHPO Uncharacterized urease accessory protein ureD-like OS=Schizosaccharomyces pombe (strain 972 / ATCC 24843) GN=SPAC3A12.09c PE=2 SV=1//1.87718e-13
CADAFLAG00003370	AFLA_014850	1025.3	639.211	0.68169	0.00040263	sp|Q2UDE5|CHO2_ASPOR Phosphatidylethanolamine N-methyltransferase OS=Aspergillus oryzae (strain ATCC 42149 / RIB 40) GN=cho2 PE=3 SV=1//1.74338e-10
CADAFLAG00003374	AFLA_014890	30.8588	193.681	-2.6499	2.3267e-10	-//-
CADAFLAG00003384	AFLA_014990	451.368	266.569	0.7598	0.010541	sp|Q9NWF9|RN216_HUMAN E3 ubiquitin-protein ligase RNF216 OS=Homo sapiens GN=RNF216 PE=1 SV=3//2.8375e-28
CADAFLAG00003396	AFLA_015110	1491.79	641.233	1.2181	6.5255e-14	-//-
CADAFLAG00003397	AFLA_015120	40.658	108.261	-1.4129	0.017891	sp|Q07589|YD144_YEAST Uncharacterized protein YDL144C OS=Saccharomyces cerevisiae (strain ATCC 204508 / S288c) GN=YDL144C PE=1 SV=2//3.42326e-08
CADAFLAG00003403	AFLA_015180	749.77	4534.21	-2.5963	6.8831e-11	-//-
CADAFLAG00003407	AFLA_015220	586.281	1101.17	-0.90937	2.1982e-06	sp|O94524|GTO2_SCHPO Glutathione S-transferase omega-like 2 OS=Schizosaccharomyces pombe (strain 972 / ATCC 24843) GN=gto2 PE=2 SV=1//6.38978e-21
CADAFLAG00003421	AFLA_015360	1065.83	1849.77	-0.79536	1.1877e-06	sp|O94632|MU158_SCHPO Meiotically up-regulated gene 158 protein OS=Schizosaccharomyces pombe (strain 972 / ATCC 24843) GN=mug158 PE=1 SV=4//7.50009e-24
CADAFLAG00003427	AFLA_015420	770.612	1162.33	-0.59295	0.010369	sp|Q1K9C2|MET5_SCHPO Sulfite reductase [NADPH] subunit beta OS=Schizosaccharomyces pombe (strain 972 / ATCC 24843) GN=sir1 PE=3 SV=1//0
CADAFLAG00003434	AFLA_015490	218.249	657.387	-1.5908	4.3774e-12	sp|P15245|PH2M_TRICU Phenol 2-monooxygenase OS=Trichosporon cutaneum PE=1 SV=3//2.17947e-96
CADAFLAG00003438	AFLA_015530	97.821	286.848	-1.5521	3.8997e-06	-//-
CADAFLAG00003439	AFLA_015540	101.163	25.1108	2.0103	0.0012239	sp|P38680|MTR_NEUCR N amino acid transport system protein OS=Neurospora crassa (strain ATCC 24698 / 74-OR23-1A / CBS 708.71 / DSM 1257 / FGSC 987) GN=mtr PE=3 SV=2//1.25099e-42
CADAFLAG00003442	AFLA_015570	234.199	601.497	-1.3608	6.3478e-05	-//-
CADAFLAG00003443	AFLA_015580	3217.91	12490.7	-1.9567	3.3814e-48	sp|P0C0Y5|MTDH_DAVTA Probable NADP-dependent mannitol dehydrogenase OS=Davidiella tassiana PE=1 SV=1//7.78103e-151
CADAFLAG00003444	AFLA_015590	187.915	463.73	-1.3032	6.8893e-07	sp|Q10084|MFS2_SCHPO Uncharacterized transporter mfs2 OS=Schizosaccharomyces pombe (strain 972 / ATCC 24843) GN=mfs2 PE=2 SV=1//4.16526e-57
CADAFLAG00003445	AFLA_015600	507.741	799.811	-0.65557	0.0033228	sp|Q2UD74|AT222_ASPOR Autophagy-related protein 22-2 OS=Aspergillus oryzae (strain ATCC 42149 / RIB 40) GN=atg22-2 PE=3 SV=2//5.55185e-27
CADAFLAG00003446	AFLA_015610	15.0596	63.5413	-2.077	0.010422	-//-
CADAFLAG00003452	AFLA_015670	423.491	769.716	-0.86199	6.0112e-05	sp|Q8NK90|ABFA_ASPKW Alpha-N-arabinofuranosidase A OS=Aspergillus kawachii (strain NBRC 4308) GN=abfA PE=1 SV=2//7.75607e-146
CADAFLAG00003453	AFLA_015680	1244.51	633.581	0.97397	5.8097e-07	-//-
CADAFLAG00003454	AFLA_015690	1195.6	2450.52	-1.0354	5.5232e-12	sp|P43597|YFI6_YEAST Uncharacterized protein YFR016C OS=Saccharomyces cerevisiae (strain ATCC 204508 / S288c) GN=YFR016C PE=1 SV=1//4.64317e-13
CADAFLAG00003455	AFLA_015700	872.741	1453.55	-0.73596	4.3079e-05	sp|Q9SE42|RPE1_ORYSJ Ribulose-phosphate 3-epimerase, cytoplasmic isoform OS=Oryza sativa subsp. japonica GN=Os09g0505700 PE=1 SV=1//1.96829e-48
CADAFLAG00003456	AFLA_015710	706.095	1112.11	-0.65537	0.00065961	-//-
CADAFLAG00003463	AFLA_015780	252.989	86.3832	1.5503	1.0711e-05	sp|P40900|ISP4_SCHPO Sexual differentiation process protein isp4 OS=Schizosaccharomyces pombe (strain 972 / ATCC 24843) GN=isp4 PE=2 SV=2//8.9496e-69
CADAFLAG00003464	AFLA_015790	55.7426	12.0618	2.2083	0.02466	sp|Q74Z37|SEF1_ASHGO Putative transcription factor SEF1 OS=Ashbya gossypii (strain ATCC 10895 / CBS 109.51 / FGSC 9923 / NRRL Y-1056) GN=SEF1 PE=3 SV=1//1.94906e-07
CADAFLAG00003465	AFLA_015800	3289.29	2461.54	0.41822	0.030133	-//-
CADAFLAG00003473	AFLA_015880	352.638	88.1585	2	9.3482e-11	sp|O74208|PDH1_CANGA ATP-binding cassette transporter CGR1 OS=Candida glabrata (strain ATCC 2001 / CBS 138 / JCM 3761 / NBRC 0622 / NRRL Y-65) GN=PDH1 PE=3 SV=3//0
CADAFLAG00003474	AFLA_015890	257.473	76.861	1.7441	1.1234e-06	-//-
CADAFLAG00003477	AFLA_015920	54.3313	11.8149	2.2012	0.032352	sp|Q04052|ARO80_YEAST Transcriptional activator ARO80 OS=Saccharomyces cerevisiae (strain ATCC 204508 / S288c) GN=ARO80 PE=1 SV=1//5.88238e-17
CADAFLAG00003497	AFLA_016120	196.342	20.5966	3.2529	6.3424e-12	sp|Q12120|OMTA_ASPPA Sterigmatocystin 8-O-methyltransferase OS=Aspergillus parasiticus GN=omtA PE=1 SV=1//4.30982e-15
CADAFLAG00003498	AFLA_016130	111.861	16.8228	2.7332	7.6278e-06	-//-
CADAFLAG00003500	AFLA_016150	21.375	327.276	-3.9365	5.5675e-31	sp|Q9P8W5|LIP2_CANAX Lipase 2 OS=Candida albicans GN=LIP2 PE=3 SV=1//2.45192e-41
CADAFLAG00003506	AFLA_016210	201.078	1171.78	-2.5429	9.3999e-39	-//-
CADAFLAG00003525	AFLA_016400	787.415	353.175	1.1567	2.7045e-08	sp|P42769|GSTF1_ARATH Glutathione S-transferase PM239X14 OS=Arabidopsis thaliana PE=2 SV=1//6.54512e-42
CADAFLAG00003555	AFLA_016700	513.632	312.993	0.71461	0.00841	sp|P22216|RAD53_YEAST Serine/threonine-protein kinase RAD53 OS=Saccharomyces cerevisiae (strain ATCC 204508 / S288c) GN=RAD53 PE=1 SV=1//2.39885e-08
CADAFLAG00003569	AFLA_016840	1905.17	1455.45	0.38845	0.041886	sp|O74839|YC1B_SCHPO Uncharacterized MscS family protein C1183.11 OS=Schizosaccharomyces pombe (strain 972 / ATCC 24843) GN=SPCC1183.11 PE=1 SV=1//1.62173e-145
CADAFLAG00003579	AFLA_016940	866.601	1255.16	-0.53443	0.0073697	sp|P23965|ECI1_RAT Enoyl-CoA delta isomerase 1, mitochondrial OS=Rattus norvegicus GN=Eci1 PE=1 SV=1//1.85477e-07
CADAFLAG00003585	AFLA_017000	214.562	346.639	-0.69204	0.041092	sp|P44094|Y1014_HAEIN Uncharacterized protein HI_1014 OS=Haemophilus influenzae (strain ATCC 51907 / DSM 11121 / KW20 / Rd) GN=HI_1014 PE=4 SV=1//9.6276e-74
CADAFLAG00003590	AFLA_017050	55.2966	6.78325	3.0271	0.0026373	sp|P39932|STL1_YEAST Sugar transporter STL1 OS=Saccharomyces cerevisiae (strain ATCC 204508 / S288c) GN=STL1 PE=1 SV=2//9.95267e-81
CADAFLAG00003595	AFLA_017100	1124.03	3443.35	-1.6151	3.8516e-29	sp|Q2UCU3|BGALA_ASPOR Probable beta-galactosidase A OS=Aspergillus oryzae (strain ATCC 42149 / RIB 40) GN=lacA PE=3 SV=1//0
CADAFLAG00003601	AFLA_017160	299.334	151.724	0.98031	0.0039501	-//-
CADAFLAG00003607	AFLA_017220	2245.28	7438.36	-1.7281	3.6316e-40	sp|Q8TV92|MFNA_METKA L-tyrosine decarboxylase OS=Methanopyrus kandleri (strain AV19 / DSM 6324 / JCM 9639 / NBRC 100938) GN=mfnA PE=3 SV=1//5.76396e-08
CADAFLAG00003615	AFLA_017300	2611.32	3428.98	-0.393	0.020352	sp|B8NHY4|ORDA_ASPFN O-methylsterigmatocystin oxidoreductase OS=Aspergillus flavus (strain ATCC 200026 / FGSC A1120 / NRRL 3357 / JCM 12722 / SRRC 167) GN=ordA PE=2 SV=1//5.9003e-154
CADAFLAG00003621	AFLA_017360	2402.69	1404.48	0.77461	1.806e-07	-//-
CADAFLAG00003626	AFLA_017410	1936.44	7243.26	-1.9032	5.0886e-47	sp|Q01358|BLI3_NEUCR Protein bli-3 OS=Neurospora crassa (strain ATCC 24698 / 74-OR23-1A / CBS 708.71 / DSM 1257 / FGSC 987) GN=bli-3 PE=2 SV=1//1.05045e-10
CADAFLAG00003627	AFLA_017420	77.7642	212.255	-1.4486	0.00023603	-//-
CADAFLAG00003647	AFLA_017620	3893.93	6308.97	-0.69618	2.2161e-07	sp|Q76MU7|H4_ASPOR Histone H4 OS=Aspergillus oryzae (strain ATCC 42149 / RIB 40) GN=hhfA PE=3 SV=3//3.14184e-51
CADAFLAG00003649	AFLA_017640	120.82	494.166	-2.0321	7.9178e-08	-//-
CADAFLAG00003667	AFLA_017820	734.364	1045.96	-0.51026	0.017555	sp|O43059|SYP1_SCHPO Cytoskeletal protein syp1 OS=Schizosaccharomyces pombe (strain 972 / ATCC 24843) GN=syp1 PE=1 SV=1//3.24173e-20
CADAFLAG00003669	AFLA_017840	98.4013	454.653	-2.208	1.0376e-15	sp|Q70LM4|LGRD_BREPA Linear gramicidin synthase subunit D OS=Brevibacillus parabrevis GN=lgrD PE=1 SV=1//1.73797e-21
CADAFLAG00003670	AFLA_017850	1491.77	7217.46	-2.2745	8.6573e-65	-//-
CADAFLAG00003671	AFLA_017860	1053.99	7033.42	-2.7384	5.5602e-22	-//-
CADAFLAG00003673	AFLA_017880	403.544	1018.41	-1.3355	1.8871e-05	-//-
CADAFLAG00003675	AFLA_017900	1047.91	676.479	0.6314	0.0016203	sp|P87000|ACU15_NEUCR Transcriptional activator protein acu-15 OS=Neurospora crassa (strain ATCC 24698 / 74-OR23-1A / CBS 708.71 / DSM 1257 / FGSC 987) GN=acu-15 PE=1 SV=2//0
CADAFLAG00003680	AFLA_017950	1005.78	1574.59	-0.64666	0.00031652	sp|P48503|QCR8_NEUCR Cytochrome b-c1 complex subunit 8 OS=Neurospora crassa (strain ATCC 24698 / 74-OR23-1A / CBS 708.71 / DSM 1257 / FGSC 987) GN=qcr-8 PE=1 SV=1//1.27476e-15
CADAFLAG00003687	AFLA_018020	73.2417	713.898	-3.285	2.0757e-43	-//-
CADAFLAG00003689	AFLA_018040	47.9066	575.988	-3.5877	9.9401e-43	sp|P81156|GOX_PENAG Glucose oxidase OS=Penicillium amagasakiense PE=1 SV=1//0
CADAFLAG00003695	AFLA_018100	237.627	464.764	-0.9678	0.00091615	sp|O34969|YFJR_BACSU Uncharacterized oxidoreductase YfjR OS=Bacillus subtilis (strain 168) GN=yfjR PE=3 SV=2//9.75777e-21
CADAFLAG00003709	AFLA_018240	768.177	426.286	0.84962	8.2637e-05	sp|O14035|YEME_SCHPO Uncharacterized permease C29B12.14c OS=Schizosaccharomyces pombe (strain 972 / ATCC 24843) GN=SPAC29B12.14c PE=2 SV=2//2.38085e-28
CADAFLAG00003711	AFLA_018260	428.616	667.896	-0.63994	0.0090624	sp|Q7RYI0|MOS1_NEUCR Mitochondrial inner membrane organizing system protein NCU06495 OS=Neurospora crassa (strain ATCC 24698 / 74-OR23-1A / CBS 708.71 / DSM 1257 / FGSC 987) GN=NCU06495 PE=3 SV=1//4.43702e-33
CADAFLAG00003721	AFLA_018360	229.469	521.769	-1.1851	1.8047e-06	sp|Q9M0X9|4CLL7_ARATH 4-coumarate--CoA ligase-like 7 OS=Arabidopsis thaliana GN=4CLL7 PE=1 SV=1//9.58299e-23
CADAFLAG00003730	AFLA_018450	324.326	112.035	1.5335	1.2588e-06	-//-
CADAFLAG00003734	AFLA_018490	231.679	514.198	-1.1502	5.546e-06	-//-
CADAFLAG00003740	AFLA_018550	8947.94	6932.55	0.36817	0.008114	sp|P06738|PHSG_YEAST Glycogen phosphorylase OS=Saccharomyces cerevisiae (strain ATCC 204508 / S288c) GN=GPH1 PE=1 SV=4//0
CADAFLAG00003758	AFLA_018730	305.829	494.613	-0.69357	0.011258	sp|Q6JQN1|ACD10_HUMAN Acyl-CoA dehydrogenase family member 10 OS=Homo sapiens GN=ACAD10 PE=2 SV=1//8.46899e-17
CADAFLAG00003763	AFLA_018780	121.429	433.986	-1.8375	4.3987e-08	-//-
CADAFLAG00003764	AFLA_018790	196.378	72.3468	1.4406	0.0006092	sp|P22152|CRNA_EMENI Nitrate transporter OS=Emericella nidulans (strain FGSC A4 / ATCC 38163 / CBS 112.46 / NRRL 194 / M139) GN=crnA PE=2 SV=2//2.2459e-12
CADAFLAG00003803	AFLA_019180	774.164	500.584	0.62903	0.004643	-//-
CADAFLAG00003808	AFLA_019230	451.345	4404.37	-3.2866	3.908e-111	-//-
CADAFLAG00003815	AFLA_019300	171.129	78.342	1.1272	0.011742	-//-
CADAFLAG00003828	AFLA_019430	432.949	239.882	0.85187	0.0025105	sp|Q5EXK1|3HBH_KLEOX 3-hydroxybenzoate 6-hydroxylase OS=Klebsiella oxytoca GN=mhbM PE=1 SV=1//3.41714e-46
CADAFLAG00003829	AFLA_019440	324.766	166.277	0.96581	0.002638	-//-
CADAFLAG00003834	AFLA_019490	697.229	1385.85	-0.99106	0.00073637	sp|O43084|YHS9_SCHPO Uncharacterized protein C947.09 OS=Schizosaccharomyces pombe (strain 972 / ATCC 24843) GN=SPBC947.09 PE=2 SV=1//2.76651e-17
CADAFLAG00003836	AFLA_019510	1969.38	1385.99	0.50682	0.0021612	-//-
CADAFLAG00003843	AFLA_019580	693.352	169.534	2.032	2.7524e-19	sp|P15325|QUTD_EMENI Quinate permease OS=Emericella nidulans (strain FGSC A4 / ATCC 38163 / CBS 112.46 / NRRL 194 / M139) GN=qutD PE=1 SV=2//2.48151e-19
CADAFLAG00003846	AFLA_019610	9223.39	12929.9	-0.48735	0.00022181	sp|P34946|CPS1_PENJA Carboxypeptidase S1 OS=Penicillium janthinellum PE=1 SV=1//8.72661e-73
CADAFLAG00003847	AFLA_019620	2183.85	5720.17	-1.3892	1.9491e-25	-//-
CADAFLAG00003850	AFLA_019650	228.464	694.607	-1.6042	6.6971e-13	sp|Q8DJN6|PHK_THEEB Probable phosphoketolase OS=Thermosynechococcus elongatus (strain BP-1) GN=tll1186 PE=3 SV=1//0
CADAFLAG00003885	AFLA_020000	32.0536	251.944	-2.9745	7.8039e-16	sp|P17872|PME_ASPTU Pectinesterase OS=Aspergillus tubingensis GN=pme1 PE=1 SV=1//0
CADAFLAG00003887	AFLA_020020	225.761	655.739	-1.5383	3.1851e-05	-//-
CADAFLAG00003894	AFLA_020090	213.351	105.992	1.0093	0.01366	-//-
CADAFLAG00003895	AFLA_020100	925.025	561.211	0.72095	0.00051105	-//-
CADAFLAG00003914	AFLA_020290	191.888	325.302	-0.76151	0.024074	sp|O13992|MUG56_SCHPO Meiotically up-regulated gene 56 protein OS=Schizosaccharomyces pombe (strain 972 / ATCC 24843) GN=mug56 PE=1 SV=1//1.21405e-87
CADAFLAG00003944	AFLA_020590	1197.48	773.618	0.63031	0.00072219	sp|Q9GKX6|GALM_PIG Aldose 1-epimerase OS=Sus scrofa GN=GALM PE=2 SV=1//1.02073e-30
CADAFLAG00003952	AFLA_020670	343.367	160.776	1.0947	0.00045811	-//-
CADAFLAG00003956	AFLA_020710	161.052	302.142	-0.9077	0.0092272	-//-
CADAFLAG00003972	AFLA_020870	122.162	230.336	-0.91495	0.023324	sp|Q1MTQ7|KLP9_SCHPO Kinesin-like motor protein 9 OS=Schizosaccharomyces pombe (strain 972 / ATCC 24843) GN=klp9 PE=1 SV=2//6.37954e-08
CADAFLAG00003978	AFLA_020930	150.943	346.814	-1.2002	0.0192	-//-
CADAFLAG00003979	AFLA_020940	95.1845	218.028	-1.1957	0.0024503	-//-
CADAFLAG00003984	AFLA_020990	4639.97	3095.19	0.58409	2.0292e-05	sp|Q9SUV2|PT432_ARATH Probable sugar phosphate/phosphate translocator At4g32390 OS=Arabidopsis thaliana GN=At4g32390 PE=2 SV=1//7.42955e-13
CADAFLAG00003985	AFLA_021000	2827.12	1784.11	0.66413	3.2602e-06	-//-
CADAFLAG00004001	AFLA_021160	690.368	2732.3	-1.9847	4.0435e-11	sp|Q10494|YDG7_SCHPO Uncharacterized oxidoreductase C26F1.07 OS=Schizosaccharomyces pombe (strain 972 / ATCC 24843) GN=SPAC26F1.07 PE=2 SV=1//3.35407e-82
CADAFLAG00004010	AFLA_021250	829.439	1497.87	-0.85271	7.6921e-07	sp|Q9P3T7|ODC_SCHPO Probable mitochondrial 2-oxodicarboxylate carrier OS=Schizosaccharomyces pombe (strain 972 / ATCC 24843) GN=SPAC328.09 PE=2 SV=1//5.07487e-85
CADAFLAG00004014	AFLA_021290	135.751	60.2613	1.1717	0.023564	-//-
CADAFLAG00004021	AFLA_021360	31.0899	110.754	-1.8328	0.0015947	sp|P0C154|Y0679_EMENI Uncharacterized protein AN0679 OS=Emericella nidulans (strain FGSC A4 / ATCC 38163 / CBS 112.46 / NRRL 194 / M139) GN=AN10108 PE=3 SV=1//4.10829e-85
CADAFLAG00004022	AFLA_021370	265.423	488.498	-0.88006	0.0013873	sp|Q09707|YA39_SCHPO Putative acetyltransferase C18B11.09c OS=Schizosaccharomyces pombe (strain 972 / ATCC 24843) GN=SPAC18B11.09c PE=2 SV=2//7.58966e-24
CADAFLAG00004024	AFLA_021390	157.243	279.547	-0.8301	0.027322	sp|Q10318|ILV3_SCHPO Putative dihydroxy-acid dehydratase, mitochondrial OS=Schizosaccharomyces pombe (strain 972 / ATCC 24843) GN=SPAC17G8.06c PE=2 SV=1//0
CADAFLAG00004055	AFLA_021700	2058.84	3063.35	-0.57328	0.0079053	sp|P43567|AGX1_YEAST Alanine--glyoxylate aminotransferase 1 OS=Saccharomyces cerevisiae (strain ATCC 204508 / S288c) GN=AGX1 PE=1 SV=1//5.98188e-97
CADAFLAG00004069	AFLA_021840	206.862	104.735	0.98193	0.019445	sp|Q4WN99|DPH2_ASPFU Diphthamide biosynthesis protein 2 OS=Neosartorya fumigata (strain ATCC MYA-4609 / Af293 / CBS 101355 / FGSC A1100) GN=dph2 PE=3 SV=1//0
CADAFLAG00004088	AFLA_022030	2880.55	4007.34	-0.4763	0.0024096	sp|Q9FUS8|GSTUH_ARATH Glutathione S-transferase U17 OS=Arabidopsis thaliana GN=GSTU17 PE=2 SV=1//5.37661e-17
CADAFLAG00004089	AFLA_022040	225.944	443.579	-0.97323	0.00049249	sp|Q8K274|KT3K_MOUSE Ketosamine-3-kinase OS=Mus musculus GN=Fn3krp PE=2 SV=2//1.01151e-29
CADAFLAG00004101	AFLA_022160	494.487	277.254	0.83472	0.0010588	sp|Q99271|NAH1_YEAST Na(+)/H(+) antiporter OS=Saccharomyces cerevisiae (strain ATCC 204508 / S288c) GN=NHA1 PE=1 SV=1//7.08183e-49
CADAFLAG00004105	AFLA_022200	764.32	1715.16	-1.1661	1.7764e-12	sp|P09437|CYB2_HANAN Cytochrome b2, mitochondrial OS=Hansenula anomala GN=CYB2 PE=1 SV=2//1.1563e-80
CADAFLAG00004107	AFLA_022220	308.986	490.639	-0.66712	0.015605	sp|Q8TFH0|YIKE_SCHPO Probable 6-phosphofructo-2-kinase PB17E12.14c OS=Schizosaccharomyces pombe (strain 972 / ATCC 24843) GN=SPAPB17E12.14c PE=1 SV=2//1.22324e-13
CADAFLAG00004109	AFLA_022240	88.2404	319.729	-1.8573	8.024e-09	-//-
CADAFLAG00004118	AFLA_022330	247.507	422.935	-0.77297	0.015239	sp|Q2UBI2|YME2_ASPOR Mitochondrial escape protein 2 OS=Aspergillus oryzae (strain ATCC 42149 / RIB 40) GN=yme2 PE=3 SV=1//1.60139e-18
CADAFLAG00004131	AFLA_022460	1254.31	1751.36	-0.48158	0.011223	sp|Q7JK39|DHDH_MACFU Trans-1,2-dihydrobenzene-1,2-diol dehydrogenase OS=Macaca fuscata fuscata GN=DHDH PE=1 SV=1//2.38487e-41
CADAFLAG00004132	AFLA_022470	890.249	1344.53	-0.59482	0.0020037	sp|Q2UBH0|KAD1_ASPOR Adenylate kinase 1 OS=Aspergillus oryzae (strain ATCC 42149 / RIB 40) GN=adk1 PE=3 SV=2//1.9462e-48
CADAFLAG00004144	AFLA_022590	1204.02	1868.81	-0.63426	0.00017361	sp|O13890|YE35_SCHPO UPF0061 protein C20G4.05c OS=Schizosaccharomyces pombe (strain 972 / ATCC 24843) GN=SPAC20G4.05c PE=2 SV=1//3.75383e-28
CADAFLAG00004149	AFLA_022640	974.947	673.987	0.5326	0.015446	sp|P47190|PMT3_YEAST Dolichyl-phosphate-mannose--protein mannosyltransferase 3 OS=Saccharomyces cerevisiae (strain ATCC 204508 / S288c) GN=PMT3 PE=1 SV=2//2.79898e-44
CADAFLAG00004164	AFLA_104270	41.6592	128.587	-1.626	0.0024955	sp|P45857|ACDB_BACSU Acyl-CoA dehydrogenase OS=Bacillus subtilis (strain 168) GN=mmgC PE=2 SV=3//1.5591e-37
CADAFLAG00004167	AFLA_104300	118.61	249.675	-1.0738	0.0038803	sp|B8N7I7|ABFB_ASPFN Probable alpha-N-arabinofuranosidase B OS=Aspergillus flavus (strain ATCC 200026 / FGSC A1120 / NRRL 3357 / JCM 12722 / SRRC 167) GN=abfB PE=3 SV=1//0
CADAFLAG00004174	AFLA_104370	426.458	235.121	0.859	0.0027642	-//-
CADAFLAG00004175	AFLA_104380	600.214	375.547	0.67648	0.0079138	-//-
CADAFLAG00004204	AFLA_104670	787.299	422.688	0.89732	1.3331e-05	sp|P34528|YM67_CAEEL Putative serine protease K12H4.7 OS=Caenorhabditis elegans GN=K12H4.7 PE=2 SV=2//1.51485e-30
CADAFLAG00004227	AFLA_104900	2395.2	173.825	3.7844	3.7868e-111	sp|P49374|HGT1_KLULA High-affinity glucose transporter OS=Kluyveromyces lactis (strain ATCC 8585 / CBS 2359 / DSM 70799 / NBRC 1267 / NRRL Y-1140 / WM37) GN=HGT1 PE=3 SV=1//3.8664e-13
CADAFLAG00004229	AFLA_104920	718.812	2787.56	-1.9553	5.3203e-38	sp|A1C9G0|CUTI3_ASPCL Probable cutinase 3 OS=Aspergillus clavatus (strain ATCC 1007 / CBS 513.65 / DSM 816 / NCTC 3887 / NRRL 1) GN=ACLA_055320 PE=3 SV=1//2.79298e-30
CADAFLAG00004256	AFLA_105190	95.9725	211.045	-1.1369	0.024816	sp|Q70LM4|LGRD_BREPA Linear gramicidin synthase subunit D OS=Brevibacillus parabrevis GN=lgrD PE=1 SV=1//6.1713e-19
CADAFLAG00004284	AFLA_105470	582.029	957.132	-0.71763	0.00041097	-//-
CADAFLAG00004285	AFLA_105480	116.09	367.188	-1.6613	3.8027e-08	-//-
CADAFLAG00004293	AFLA_105560	14.0709	51.5034	-1.872	0.041333	sp|P53283|TPO2_YEAST Polyamine transporter 2 OS=Saccharomyces cerevisiae (strain ATCC 204508 / S288c) GN=TPO2 PE=1 SV=1//2.50491e-57
CADAFLAG00004298	AFLA_105610	314.399	619.156	-0.9777	4.3955e-05	sp|Q10318|ILV3_SCHPO Putative dihydroxy-acid dehydratase, mitochondrial OS=Schizosaccharomyces pombe (strain 972 / ATCC 24843) GN=SPAC17G8.06c PE=2 SV=1//1.27214e-29
CADAFLAG00004300	AFLA_105630	7261.56	3190.99	1.1863	1.4876e-24	sp|O13317|TRI11_FUSSP Isotrichodermin C-15 hydroxylase OS=Fusarium sporotrichioides GN=TRI11 PE=3 SV=1//1.77737e-123
CADAFLAG00004302	AFLA_105650	162.27	78.3658	1.0501	0.031954	sp|P96155|HEX1_VIBFU Beta-hexosaminidase OS=Vibrio furnissii GN=exo I PE=1 SV=1//2.3287e-12
CADAFLAG00004310	AFLA_105730	13.1557	67.0445	-2.3494	0.014487	-//-
CADAFLAG00004311	AFLA_105740	725.941	1614.62	-1.1533	8.1884e-12	sp|O94284|HMT2_SCHPO Sulfide:quinone oxidoreductase, mitochondrial OS=Schizosaccharomyces pombe (strain 972 / ATCC 24843) GN=hmt2 PE=2 SV=1//1.03439e-117
CADAFLAG00004312	AFLA_105750	96.6784	207.988	-1.1052	0.0064007	sp|Q54EJ5|GLOB2_DICDI Glyoxylase B2 OS=Dictyostelium discoideum GN=gloB2 PE=3 SV=1//6.28333e-67
CADAFLAG00004313	AFLA_105760	164.529	1229.72	-2.9019	6.9335e-20	sp|Q9UI17|M2GD_HUMAN Dimethylglycine dehydrogenase, mitochondrial OS=Homo sapiens GN=DMGDH PE=1 SV=2//6.58626e-104
CADAFLAG00004326	AFLA_105900	195.337	1189.55	-2.6064	2.3988e-40	sp|B8N7Z6|FAEC_ASPFN Probable feruloyl esterase C OS=Aspergillus flavus (strain ATCC 200026 / FGSC A1120 / NRRL 3357 / JCM 12722 / SRRC 167) GN=faeC PE=3 SV=1//0
CADAFLAG00004327	AFLA_105910	788.42	5185.78	-2.7175	1.6698e-82	sp|Q5BCX8|EGLD_EMENI Endo-beta-1,4-glucanase D OS=Emericella nidulans (strain FGSC A4 / ATCC 38163 / CBS 112.46 / NRRL 194 / M139) GN=eglD PE=1 SV=1//5.6263e-19
CADAFLAG00004328	AFLA_105920	479.528	712.863	-0.57201	0.020165	sp|B8N7Z8|PGLRB_ASPFN Probable endopolygalacturonase B OS=Aspergillus flavus (strain ATCC 200026 / FGSC A1120 / NRRL 3357 / JCM 12722 / SRRC 167) GN=pgaB PE=3 SV=1//8.16202e-14
CADAFLAG00004347	AFLA_106110	86.4045	24.6172	1.8114	0.010121	sp|Q9USN4|YJA1_SCHPO Uncharacterized transporter C1529.01 OS=Schizosaccharomyces pombe (strain 972 / ATCC 24843) GN=SPCC1529.01 PE=2 SV=2//9.17318e-08
CADAFLAG00004352	AFLA_106160	88.6613	177.846	-1.0042	0.028317	sp|Q96VC9|LIP3_YARLI Lipase 3 OS=Yarrowia lipolytica (strain CLIB 122 / E 150) GN=LIP3 PE=3 SV=1//1.82539e-10
CADAFLAG00004365	AFLA_106290	794.434	540.543	0.55552	0.015938	sp|B5BP48|YP54_SCHPO Putative alpha-ketoglutarate-dependent sulfonate dioxygenase OS=Schizosaccharomyces pombe (strain 972 / ATCC 24843) GN=SPBC460.04c PE=3 SV=1//3.30829e-84
CADAFLAG00004371	AFLA_106350	2516.64	1776.43	0.50252	0.0014846	sp|O13907|ACL2_SCHPO Probable ATP-citrate synthase subunit 2 OS=Schizosaccharomyces pombe (strain 972 / ATCC 24843) GN=SPAC22A12.16 PE=1 SV=1//6.83348e-30
CADAFLAG00004375	AFLA_106390	647.265	1091.69	-0.75414	9.3722e-05	sp|Q9UTL3|RPIA_SCHPO Ribose-5-phosphate isomerase OS=Schizosaccharomyces pombe (strain 972 / ATCC 24843) GN=rki1 PE=2 SV=1//4.50733e-10
CADAFLAG00004392	AFLA_106560	510.091	309.466	0.72097	0.0073238	sp|P53303|ZPR1_YEAST Zinc finger protein ZPR1 OS=Saccharomyces cerevisiae (strain ATCC 204508 / S288c) GN=ZPR1 PE=1 SV=1//4.89792e-18
CADAFLAG00004407	AFLA_106710	836.251	1794.4	-1.1015	0.0062295	-//-
CADAFLAG00004411	AFLA_106750	2454.34	3545.79	-0.53077	0.00039165	sp|P49374|HGT1_KLULA High-affinity glucose transporter OS=Kluyveromyces lactis (strain ATCC 8585 / CBS 2359 / DSM 70799 / NBRC 1267 / NRRL Y-1140 / WM37) GN=HGT1 PE=3 SV=1//4.92081e-17
CADAFLAG00004414	AFLA_106780	413.22	751.939	-0.86371	0.0056202	sp|Q10138|YAS2_SCHPO CRAL-TRIO domain-containing protein C3H8.02 OS=Schizosaccharomyces pombe (strain 972 / ATCC 24843) GN=SPAC3H8.02 PE=1 SV=1//5.02085e-27
CADAFLAG00004424	AFLA_106880	4495.42	7018.66	-0.64274	8.8574e-07	sp|P27800|ALDX_SPOSA Aldehyde reductase 1 OS=Sporobolomyces salmonicolor GN=ARI PE=1 SV=3//1.99277e-62
CADAFLAG00004436	AFLA_107000	362.805	209.27	0.79383	0.015045	sp|Q04225|RRB1_YEAST Ribosome assembly protein RRB1 OS=Saccharomyces cerevisiae (strain ATCC 204508 / S288c) GN=RRB1 PE=1 SV=1//4.41864e-123
CADAFLAG00004479	AFLA_107430	27.7818	512.176	-4.2044	1.8452e-50	-//-
CADAFLAG00004481	AFLA_107450	74.6209	147.48	-0.98287	0.049753	sp|O00625|PIR_HUMAN Pirin OS=Homo sapiens GN=PIR PE=1 SV=1//3.24629e-92
CADAFLAG00004483	AFLA_107470	307.441	521.005	-0.76099	0.0033911	-//-
CADAFLAG00004490	AFLA_107540	74.1945	21.0903	1.8147	0.017027	sp|O93884|DAS_CANBO Dihydroxyacetone synthase OS=Candida boidinii GN=DAS1 PE=1 SV=3//2.8703e-95
CADAFLAG00004491	AFLA_107550	185.909	91.168	1.028	0.020186	sp|Q763T4|LAD_ASPOZ L-arabinitol 4-dehydrogenase OS=Aspergillus oryzae GN=ladA PE=1 SV=1//3.75244e-92
CADAFLAG00004495	AFLA_107590	662.541	433.316	0.61259	0.013701	sp|P21839|ODBB_BOVIN 2-oxoisovalerate dehydrogenase subunit beta, mitochondrial OS=Bos taurus GN=BCKDHB PE=1 SV=2//5.07442e-46
CADAFLAG00004516	AFLA_107800	70.4225	201.229	-1.5147	0.00012856	sp|P53626|E13B_TRIHA Glucan endo-1,3-beta-glucosidase BGN13.1 OS=Trichoderma harzianum GN=bgn13.1 PE=1 SV=1//1.37014e-147
CADAFLAG00004517	AFLA_107810	4586.55	5742.23	-0.3242	0.048031	sp|Q9SVM8|GRP2_ARATH Glycine-rich RNA-binding protein 2, mitochondrial OS=Arabidopsis thaliana GN=GRP2 PE=1 SV=1//3.40444e-26
CADAFLAG00004535	AFLA_107990	226.084	54.266	2.0587	1.9183e-07	sp|C5FW30|SPCA_ARTOC Carboxypeptidase S1 homolog A OS=Arthroderma otae (strain ATCC MYA-4605 / CBS 113480) GN=SCPA PE=3 SV=1//0
CADAFLAG00004546	AFLA_108100	2989.93	1931.39	0.63047	1.1066e-05	sp|P22768|ASSY_YEAST Argininosuccinate synthase OS=Saccharomyces cerevisiae (strain ATCC 204508 / S288c) GN=ARG1 PE=1 SV=3//0
CADAFLAG00004550	AFLA_108140	44.2885	8.78166	2.3344	0.033147	sp|P0AE24|ARAE_ECOLI Arabinose-proton symporter OS=Escherichia coli (strain K12) GN=araE PE=1 SV=1//4.8829e-06
CADAFLAG00004552	AFLA_108160	274.841	1071.34	-1.9627	1.6141e-23	sp|Q2UHL4|PGLR1_ASPOR Endopolygalacturonase I OS=Aspergillus oryzae (strain ATCC 42149 / RIB 40) GN=pgaI PE=1 SV=1//0
CADAFLAG00004562	AFLA_108260	1141.27	553.417	1.0442	9.8589e-09	sp|Q9C0V1|AMT1_SCHPO Ammonium transporter 1 OS=Schizosaccharomyces pombe (strain 972 / ATCC 24843) GN=amt1 PE=2 SV=1//1.06607e-67
CADAFLAG00004604	AFLA_108690	138.318	59.0271	1.2285	0.020727	-//-
CADAFLAG00004609	AFLA_108740	5980.62	3328.77	0.84531	2.7847e-12	-//-
CADAFLAG00004612	AFLA_108770	583.532	228.855	1.3504	1.433e-08	sp|O60113|YG64_SCHPO Uncharacterized amino-acid permease C15C4.04c OS=Schizosaccharomyces pombe (strain 972 / ATCC 24843) GN=SPBC15C4.04c PE=2 SV=1//2.95908e-42
CADAFLAG00004621	AFLA_108860	579.908	830.448	-0.51806	0.027283	sp|P0C954|GEL2_ASPFU 1,3-beta-glucanosyltransferase gel2 OS=Neosartorya fumigata (strain ATCC MYA-4609 / Af293 / CBS 101355 / FGSC A1100) GN=gel2 PE=3 SV=1//0
CADAFLAG00004630	AFLA_108960	808.014	489.087	0.72429	0.00084589	sp|O93937|PYR1_EMENI Protein pyrABCN OS=Emericella nidulans (strain FGSC A4 / ATCC 38163 / CBS 112.46 / NRRL 194 / M139) GN=pyrABCN PE=3 SV=2//2.25519e-114
CADAFLAG00004632	AFLA_108980	277.373	139.956	0.98685	0.010092	sp|Q12324|YVC1_YEAST Calcium channel YVC1 OS=Saccharomyces cerevisiae (strain ATCC 204508 / S288c) GN=YVC1 PE=1 SV=2//2.62925e-12
CADAFLAG00004633	AFLA_108990	280.468	166.548	0.7519	0.049533	-//-
CADAFLAG00004642	AFLA_109080	28.3441	99.7029	-1.8146	0.0035455	sp|P49374|HGT1_KLULA High-affinity glucose transporter OS=Kluyveromyces lactis (strain ATCC 8585 / CBS 2359 / DSM 70799 / NBRC 1267 / NRRL Y-1140 / WM37) GN=HGT1 PE=3 SV=1//6.94592e-46
CADAFLAG00004649	AFLA_109150	72.1867	11.5681	2.6416	0.0017771	sp|Q09838|PRZ1_SCHPO Transcriptional regulator prz1 OS=Schizosaccharomyces pombe (strain 972 / ATCC 24843) GN=prz1 PE=1 SV=1//2.06856e-12
CADAFLAG00004650	AFLA_109160	1434.52	948.112	0.59744	0.00054943	sp|Q10132|IDI1_SCHPO Isopentenyl-diphosphate Delta-isomerase OS=Schizosaccharomyces pombe (strain 972 / ATCC 24843) GN=idi1 PE=2 SV=2//7.73571e-97
CADAFLAG00004653	AFLA_109190	343.023	212.972	0.68764	0.037331	sp|Q92373|RFA2_SCHPO Replication factor A protein 2 OS=Schizosaccharomyces pombe (strain 972 / ATCC 24843) GN=ssb2 PE=1 SV=1//5.48885e-38
CADAFLAG00004657	AFLA_109230	118.42	323.75	-1.451	5.3247e-06	sp|O14075|YEAA_SCHPO Putative 2-hydroxyacid dehydrogenase UNK4.10 OS=Schizosaccharomyces pombe (strain 972 / ATCC 24843) GN=SPAC2E11.10 PE=2 SV=1//3.45249e-89
CADAFLAG00004663	AFLA_109290	182.033	354.704	-0.96241	0.0015865	sp|P38364|PID6_FUSSO Pisatin demethylase OS=Fusarium solani subsp. pisi GN=PDA6-1 PE=3 SV=1//1.05015e-26
CADAFLAG00004666	AFLA_109320	889.068	1708.6	-0.94245	1.5249e-08	sp|Q54CX6|3HIDH_DICDI Probable 3-hydroxyisobutyrate dehydrogenase, mitochondrial OS=Dictyostelium discoideum GN=hibA PE=3 SV=1//1.94189e-62
CADAFLAG00004695	AFLA_109610	261.879	116.526	1.1683	0.00080729	-//-
CADAFLAG00004720	AFLA_109860	608.498	1073.74	-0.81932	3.3673e-05	sp|P26642|EF1GA_XENLA Elongation factor 1-gamma-A OS=Xenopus laevis GN=eef1g-a PE=1 SV=1//1.38277e-36
CADAFLAG00004732	AFLA_109980	32.847	105.228	-1.6797	0.0054186	sp|Q9Y7X4|YGRG_SCHPO Uncharacterized membrane protein C365.16 OS=Schizosaccharomyces pombe (strain 972 / ATCC 24843) GN=SPBC365.16 PE=2 SV=1//4.89222e-25
CADAFLAG00004744	AFLA_110100	17.7749	76.6142	-2.1078	0.002638	-//-
CADAFLAG00004746	AFLA_110120	73.6681	302.588	-2.0382	0.017544	-//-
CADAFLAG00004747	AFLA_110130	843.364	3517.19	-2.0602	3.3682e-25	sp|P16000|ATP9_EMENI ATP synthase subunit 9, mitochondrial OS=Emericella nidulans (strain FGSC A4 / ATCC 38163 / CBS 112.46 / NRRL 194 / M139) GN=atp9 PE=3 SV=2//3.10253e-46
CADAFLAG00004757	AFLA_110230	81.6688	325.971	-1.9969	0.00014352	-//-
CADAFLAG00004760	AFLA_110260	2195.91	3174.44	-0.53168	0.00057721	sp|Q9LPL3|YUC11_ARATH Putative flavin-containing monooxygenase YUCCA11 OS=Arabidopsis thaliana GN=YUC11 PE=3 SV=1//2.84627e-24
CADAFLAG00004761	AFLA_110270	23.2969	115.538	-2.3102	2.4751e-05	sp|Q2UP89|FAEB1_ASPOR Probable feruloyl esterase B-1 OS=Aspergillus oryzae (strain ATCC 42149 / RIB 40) GN=faeB-1 PE=3 SV=1//5.0287e-54
CADAFLAG00004768	AFLA_110340	44.2885	116.82	-1.3993	0.011476	sp|Q9NS00|C1GLT_HUMAN Glycoprotein-N-acetylgalactosamine 3-beta-galactosyltransferase 1 OS=Homo sapiens GN=C1GALT1 PE=1 SV=1//1.13393e-06
CADAFLAG00004771	AFLA_110370	797.448	1364.11	-0.7745	2.478e-05	sp|Q96WX4|ERG6_PNECA Sterol 24-C-methyltransferase OS=Pneumocystis carinii GN=erg6 PE=2 SV=1//1.96173e-32
CADAFLAG00004782	AFLA_110480	457.524	1286.34	-1.4913	2.1847e-16	sp|Q2UH11|MOCOS_ASPOR Molybdenum cofactor sulfurase OS=Aspergillus oryzae (strain ATCC 42149 / RIB 40) GN=hxB PE=3 SV=1//0
CADAFLAG00004785	AFLA_110510	1112.04	3870.17	-1.7992	1.3999e-18	sp|O42665|YF8B_SCHPO Uncharacterized but2-like protein C27D7.11c OS=Schizosaccharomyces pombe (strain 972 / ATCC 24843) GN=SPAC27D7.11c PE=2 SV=1//6.26969e-08
CADAFLAG00004795	AFLA_110610	592.131	287.142	1.0442	1.2671e-05	sp|P50276|MUP1_YEAST High-affinity methionine permease OS=Saccharomyces cerevisiae (strain ATCC 204508 / S288c) GN=MUP1 PE=1 SV=1//7.53266e-15
CADAFLAG00004799	AFLA_110650	1592.91	922.005	0.78881	0.0013553	sp|P39959|YEW0_YEAST Zinc finger protein YER130C OS=Saccharomyces cerevisiae (strain ATCC 204508 / S288c) GN=YER130C PE=2 SV=2//2.87751e-21
CADAFLAG00004801	AFLA_110670	1522.99	1992.81	-0.3879	0.046218	sp|Q9USR1|TXL1_SCHPO Thioredoxin-like protein 1 OS=Schizosaccharomyces pombe (strain 972 / ATCC 24843) GN=txl1 PE=2 SV=1//1.01582e-09
CADAFLAG00004834	AFLA_111000	166.286	324.291	-0.96362	0.0030118	-//-
CADAFLAG00004838	AFLA_111040	1541.74	909.283	0.76176	4.6816e-06	sp|Q9C1T1|PHYA_ASPOR 3-phytase A OS=Aspergillus oryzae (strain ATCC 42149 / RIB 40) GN=phyA PE=2 SV=1//0
CADAFLAG00004846	AFLA_111120	277.103	153.428	0.85286	0.013664	-//-
CADAFLAG00004849	AFLA_111150	309.907	186.898	0.72959	0.046242	-//-
CADAFLAG00004853	AFLA_111190	8885.22	11187.8	-0.33245	0.026158	sp|O32176|FADE_BACSU Probable acyl-CoA dehydrogenase OS=Bacillus subtilis (strain 168) GN=fadE PE=2 SV=1//3.63652e-25
CADAFLAG00004860	AFLA_111260	842.13	3042.97	-1.8534	4.354e-35	sp|O43014|MPI_SCHPO Mannose-6-phosphate isomerase OS=Schizosaccharomyces pombe (strain 972 / ATCC 24843) GN=pmi40 PE=2 SV=1//4.8805e-68
CADAFLAG00004895	AFLA_111610	342.224	200.194	0.77354	0.018822	sp|Q2UGQ8|PESC_ASPOR Pescadillo homolog OS=Aspergillus oryzae (strain ATCC 42149 / RIB 40) GN=nop7 PE=3 SV=1//0
CADAFLAG00004896	AFLA_111620	786.362	1712.26	-1.1226	2.1392e-11	sp|Q9US47|SSDH1_SCHPO Putative succinate-semialdehyde dehydrogenase C1002.12c [NADP(+)] OS=Schizosaccharomyces pombe (strain 972 / ATCC 24843) GN=SPAC1002.12c PE=2 SV=2//6.90185e-148
CADAFLAG00004914	AFLA_111800	2772.34	1879.81	0.56052	0.00025067	sp|P27121|DCOR_NEUCR Ornithine decarboxylase OS=Neurospora crassa (strain ATCC 24698 / 74-OR23-1A / CBS 708.71 / DSM 1257 / FGSC 987) GN=spe-1 PE=2 SV=1//0
CADAFLAG00004917	AFLA_111830	31.3281	165.043	-2.3973	9.5009e-08	-//-
CADAFLAG00004926	AFLA_111920	588.316	935.771	-0.66956	0.0010359	sp|Q49W60|2NPD_STAS1 Probable nitronate monooxygenase OS=Staphylococcus saprophyticus subsp. saprophyticus (strain ATCC 15305 / DSM 20229) GN=SSP1854 PE=3 SV=1//2.36722e-34
CADAFLAG00004930	AFLA_111960	379.205	595.303	-0.65065	0.012013	-//-
CADAFLAG00004932	AFLA_111980	1606.87	2217.18	-0.46448	0.0075681	sp|Q9C2B9|RL38_NEUCR 60S ribosomal protein L38 OS=Neurospora crassa (strain ATCC 24698 / 74-OR23-1A / CBS 708.71 / DSM 1257 / FGSC 987) GN=rpl-38 PE=3 SV=1//4.52582e-06
CADAFLAG00004935	AFLA_112010	149.7	684.344	-2.1926	4.6557e-09	sp|B5VKE8|SDHL_YEAS6 L-serine dehydratase OS=Saccharomyces cerevisiae (strain AWRI1631) GN=SDL1 PE=3 SV=1//5.0404e-51
CADAFLAG00004941	AFLA_112070	500.783	828.943	-0.72709	0.00076909	sp|P53157|MPC1_YEAST Mitochondrial pyruvate carrier 1 OS=Saccharomyces cerevisiae (strain ATCC 204508 / S288c) GN=FMP37 PE=1 SV=1//2.01907e-18
CADAFLAG00004943	AFLA_112090	4702.05	6380.1	-0.44029	0.0043844	sp|Q7RVN0|RL11_NEUCR 60S ribosomal protein L11 OS=Neurospora crassa (strain ATCC 24698 / 74-OR23-1A / CBS 708.71 / DSM 1257 / FGSC 987) GN=rpl-11 PE=3 SV=2//1.81151e-107
CADAFLAG00004944	AFLA_112100	1905.43	2504.08	-0.39417	0.04538	sp|P10169|CON8_NEUCR Conidiation-specific protein 8 OS=Neurospora crassa (strain ATCC 24698 / 74-OR23-1A / CBS 708.71 / DSM 1257 / FGSC 987) GN=con-8 PE=2 SV=1//3.27333e-06
CADAFLAG00004946	AFLA_112120	7096.94	12784.5	-0.84913	3.9322e-12	sp|O93918|PYC_ASPTE Pyruvate carboxylase OS=Aspergillus terreus GN=pyc PE=2 SV=1//3.9136e-09
CADAFLAG00004947	AFLA_112130	3193.19	8994.79	-1.4941	2.5819e-31	sp|Q10161|CLH_SCHPO Probable clathrin heavy chain OS=Schizosaccharomyces pombe (strain 972 / ATCC 24843) GN=chc1 PE=1 SV=1//6.94525e-19
CADAFLAG00004977	AFLA_112430	447.066	280.605	0.67195	0.026735	sp|P14376|RCSC_ECOLI Sensor kinase protein RcsC OS=Escherichia coli (strain K12) GN=rcsC PE=1 SV=3//5.13199e-11
CADAFLAG00004981	AFLA_112470	14994.2	10917.4	0.45779	0.00032322	sp|Q9UT19|METE_SCHPO Probable 5-methyltetrahydropteroyltriglutamate--homocysteine methyltransferase OS=Schizosaccharomyces pombe (strain 972 / ATCC 24843) GN=met26 PE=1 SV=1//0
CADAFLAG00004988	AFLA_112540	1466.66	680.229	1.1084	1.9812e-11	-//-
CADAFLAG00004998	AFLA_112640	757.985	1122.23	-0.56613	0.0064648	sp|P25605|ILV6_YEAST Acetolactate synthase small subunit, mitochondrial OS=Saccharomyces cerevisiae (strain ATCC 204508 / S288c) GN=ILV6 PE=1 SV=2//7.77607e-120
CADAFLAG00005013	AFLA_112790	98.3512	359.982	-1.8719	3.6967e-10	sp|Q9Y305|ACOT9_HUMAN Acyl-coenzyme A thioesterase 9, mitochondrial OS=Homo sapiens GN=ACOT9 PE=1 SV=2//1.12442e-25
CADAFLAG00005014	AFLA_112800	155.362	722.903	-2.2182	2.6337e-22	sp|Q9HDX2|YKN3_SCHPO Uncharacterized lactate 2-monooxygenase PB1A11.03 OS=Schizosaccharomyces pombe (strain 972 / ATCC 24843) GN=SPAPB1A11.03 PE=2 SV=1//3.37605e-93
CADAFLAG00005016	AFLA_112820	72.2906	185.592	-1.3603	0.0020155	sp|Q00278|NOR1_ASPPA Aflatoxin biosynthesis ketoreductase nor-1 OS=Aspergillus parasiticus GN=nor-1 PE=3 SV=1//4.31277e-28
CADAFLAG00005026	AFLA_112920	189.379	339.633	-0.8427	0.0079046	sp|P00175|CYB2_YEAST Cytochrome b2, mitochondrial OS=Saccharomyces cerevisiae (strain ATCC 204508 / S288c) GN=CYB2 PE=1 SV=1//1.16957e-27
CADAFLAG00005033	AFLA_112990	874.66	1203.93	-0.46095	0.029201	-//-
CADAFLAG00005035	AFLA_113010	593.843	382.824	0.6334	0.014885	sp|O59715|DEGS_SCHPO Dihydroceramide delta(4)-desaturase OS=Schizosaccharomyces pombe (strain 972 / ATCC 24843) GN=dsd1 PE=2 SV=1//1.51541e-06
CADAFLAG00005038	AFLA_113040	2788.45	3709.1	-0.41161	0.0083931	sp|P07144|VDAC_NEUCR Mitochondrial outer membrane protein porin OS=Neurospora crassa (strain ATCC 24698 / 74-OR23-1A / CBS 708.71 / DSM 1257 / FGSC 987) GN=B7H23.070 PE=2 SV=1//3.95353e-18
CADAFLAG00005046	AFLA_113120	15604.4	19501.3	-0.32161	0.024137	sp|Q4WNS8|ECM33_ASPFU Protein ecm33 OS=Neosartorya fumigata (strain ATCC MYA-4609 / Af293 / CBS 101355 / FGSC A1100) GN=ecm33 PE=1 SV=1//3.97647e-14
CADAFLAG00005048	AFLA_113140	1243.96	1895.83	-0.60788	0.00043377	sp|Q871K1|QCR7_NEUCR Cytochrome b-c1 complex subunit 7 OS=Neurospora crassa (strain ATCC 24698 / 74-OR23-1A / CBS 708.71 / DSM 1257 / FGSC 987) GN=qcr-7 PE=3 SV=1//6.54168e-09
CADAFLAG00005057	AFLA_113230	464.017	796.849	-0.78013	0.00025116	sp|Q9UTC5|YIDE_SCHPO Putative uridine kinase C227.14 OS=Schizosaccharomyces pombe (strain 972 / ATCC 24843) GN=SPAC227.14 PE=2 SV=1//2.21921e-43
CADAFLAG00005068	AFLA_113340	20.4598	93.9545	-2.1992	0.00032245	sp|P76049|YCJY_ECOLI Uncharacterized protein YcjY OS=Escherichia coli (strain K12) GN=ycjY PE=4 SV=2//4.22538e-42
CADAFLAG00005092	AFLA_113580	2910.2	3780.17	-0.37733	0.01913	sp|O62742|NLTP_RABIT Non-specific lipid-transfer protein OS=Oryctolagus cuniculus GN=SCP2 PE=1 SV=1//7.07436e-142
CADAFLAG00005093	AFLA_113590	153.232	293.878	-0.93949	0.0069306	-//-
CADAFLAG00005114	AFLA_113800	320.548	603.121	-0.91191	0.00014093	sp|P47176|BCA2_YEAST Branched-chain-amino-acid aminotransferase, cytosolic OS=Saccharomyces cerevisiae (strain ATCC 204508 / S288c) GN=BAT2 PE=1 SV=1//2.23699e-33
CADAFLAG00005144	AFLA_114100	8205.65	16937.8	-1.0456	1.4213e-07	sp|Q9UTI9|YKZ2_SCHPO UPF0591 membrane protein C15E1.02c OS=Schizosaccharomyces pombe (strain 972 / ATCC 24843) GN=SPAC15E1.02c PE=2 SV=1//9.39285e-12
CADAFLAG00005154	AFLA_038260	1708.12	1003.24	0.76775	1.9745e-06	-//-
CADAFLAG00005156	AFLA_038280	284.652	140.944	1.0141	0.0043873	sp|Q2KTC2|MX_DICLA Interferon-induced GTP-binding protein Mx OS=Dicentrarchus labrax GN=mx PE=2 SV=2//2.54834e-32
CADAFLAG00005158	AFLA_038300	329.737	1529.6	-2.2138	8.0263e-33	sp|Q10487|MFS1_SCHPO Transporter mfs1 OS=Schizosaccharomyces pombe (strain 972 / ATCC 24843) GN=mfs1 PE=2 SV=1//1.47499e-46
CADAFLAG00005160	AFLA_038320	206.082	485.878	-1.2374	0.00035025	sp|P32386|YBT1_YEAST ATP-dependent bile acid permease OS=Saccharomyces cerevisiae (strain ATCC 204508 / S288c) GN=YBT1 PE=1 SV=2//1.54453e-07
CADAFLAG00005162	AFLA_038340	125.366	402.386	-1.6824	4.8163e-09	sp|B0BK72|MSP2_MARSO Peroxidase 2 OS=Marasmius scorodonius GN=msp2 PE=1 SV=1//3.13813e-13
CADAFLAG00005163	AFLA_038350	76.2203	308.925	-2.019	9.3169e-10	sp|I1S2N3|GAOA_GIBZE Galactose oxidase OS=Gibberella zeae (strain PH-1 / ATCC MYA-4620 / FGSC 9075 / NRRL 31084) GN=GAOA PE=3 SV=1//0
CADAFLAG00005168	AFLA_038400	18.0865	74.0746	-2.0341	0.048031	sp|P43549|YFF4_YEAST Uncharacterized membrane protein YFL054C OS=Saccharomyces cerevisiae (strain ATCC 204508 / S288c) GN=YFL054C PE=1 SV=1//1.59445e-46
CADAFLAG00005174	AFLA_038460	478.423	216.993	1.1406	7.9208e-06	sp|B8NQQ7|PLYC_ASPFN Probable pectate lyase C OS=Aspergillus flavus (strain ATCC 200026 / FGSC A1120 / NRRL 3357 / JCM 12722 / SRRC 167) GN=plyC PE=3 SV=1//6.47485e-28
CADAFLAG00005180	AFLA_038520	34.8727	130.657	-1.9056	0.014607	-//-
CADAFLAG00005185	AFLA_038570	138.096	52.0208	1.4085	0.0096996	sp|P34731|FAS1_CANAX Fatty acid synthase subunit beta OS=Candida albicans GN=FAS1 PE=3 SV=1//1.04133e-19
CADAFLAG00005186	AFLA_038580	587.847	358.924	0.71176	0.0039187	sp|P53047|RTA1_YEAST Protein RTA1 OS=Saccharomyces cerevisiae (strain ATCC 204508 / S288c) GN=RTA1 PE=1 SV=1//7.64231e-07
CADAFLAG00005198	AFLA_038700	1079.6	519.23	1.0561	1.0847e-08	sp|Q2U1F3|LAPA_ASPOR Leucine aminopeptidase A OS=Aspergillus oryzae (strain ATCC 42149 / RIB 40) GN=lapA PE=1 SV=1//5.87432e-17
CADAFLAG00005199	AFLA_038710	26.5191	88.1823	-1.7335	0.0068621	-//-
CADAFLAG00005201	AFLA_038730	77.5744	252.461	-1.7024	1.5423e-06	sp|Q5AWB7|MANE_EMENI Probable mannan endo-1,4-beta-mannosidase E OS=Emericella nidulans (strain FGSC A4 / ATCC 38163 / CBS 112.46 / NRRL 194 / M139) GN=manE PE=3 SV=1//3.77218e-83
CADAFLAG00005204	AFLA_038760	10.4099	66.304	-2.6711	0.00052815	sp|O34508|AEEP_BACSU L-Ala-D/L-Glu epimerase OS=Bacillus subtilis (strain 168) GN=ykfB PE=1 SV=1//4.32148e-20
CADAFLAG00005207	AFLA_038790	630.559	1781.56	-1.4984	7.5884e-20	sp|Q2VQV9|CECR1_XENLA Adenosine deaminase CECR1 OS=Xenopus laevis GN=cecr1 PE=1 SV=1//7.48434e-44
CADAFLAG00005208	AFLA_038800	104.269	208.975	-1.003	0.016712	sp|P43467|AGAL1_PEDPE Alpha-galactosidase 1 OS=Pediococcus pentosaceus GN=agaR PE=3 SV=1//4.97713e-21
CADAFLAG00005210	AFLA_038830	45.9238	9.29909	2.3041	0.046807	-//-
CADAFLAG00005219	AFLA_038920	12.4661	52.7375	-2.0808	0.024912	-//-
CADAFLAG00005221	AFLA_038940	261.698	437.831	-0.74247	0.010952	sp|Q21929|DCXR_CAEEL Probable L-xylulose reductase OS=Caenorhabditis elegans GN=dhs-21 PE=2 SV=2//4.71781e-24
CADAFLAG00005226	AFLA_038990	95.7773	23.1124	2.051	0.0018648	sp|Q54NS8|AIFB_DICDI Apoptosis-inducing factor homolog B OS=Dictyostelium discoideum GN=aifB PE=3 SV=1//2.17345e-11
CADAFLAG00005240	AFLA_039130	1504.23	776.604	0.95377	4.4154e-09	sp|Q9P4U6|TCSB_EMENI Two-component system protein B OS=Emericella nidulans (strain FGSC A4 / ATCC 38163 / CBS 112.46 / NRRL 194 / M139) GN=tcsB PE=1 SV=2//0
CADAFLAG00005243	AFLA_039160	534.193	1094.11	-1.0343	6.7066e-08	sp|Q2UK93|XGEA_ASPOR Probable xyloglucan-specific endo-beta-1,4-glucanase A OS=Aspergillus oryzae (strain ATCC 42149 / RIB 40) GN=xgeA PE=3 SV=1//3.58116e-85
CADAFLAG00005245	AFLA_039180	756.164	396.191	0.9325	2.0056e-05	sp|Q00357|TOXA_COCCA Putative HC-toxin efflux carrier TOXA OS=Cochliobolus carbonum GN=TOXA PE=3 SV=1//8.61521e-50
CADAFLAG00005246	AFLA_039190	243.488	100.22	1.2807	0.0005122	-//-
CADAFLAG00005248	AFLA_039210	170.524	561.681	-1.7198	2.2295e-12	sp|O94142|KO1_GIBFU Ent-kaurene oxidase OS=Gibberella fujikuroi GN=CYP503A1 PE=1 SV=1//1.5128e-59
CADAFLAG00005249	AFLA_039220	319.189	782.424	-1.2935	2.0042e-09	sp|Q12612|TRI4_FUSSP Trichodiene oxygenase OS=Fusarium sporotrichioides GN=TRI4 PE=3 SV=1//1.85966e-15
CADAFLAG00005250	AFLA_039230	132.26	338.55	-1.356	1.7241e-05	sp|O80714|SDR3C_ARATH Short-chain dehydrogenase reductase 3c OS=Arabidopsis thaliana GN=SDR3c PE=2 SV=1//3.81357e-12
CADAFLAG00005251	AFLA_039240	43.0617	182.607	-2.0843	9.941e-07	sp|Q9UR08|ARIS_ASPTE Aristolochene synthase OS=Aspergillus terreus GN=Ari1 PE=1 SV=1//3.45451e-82
CADAFLAG00005263	AFLA_039360	362.182	136.382	1.4091	1.7694e-06	sp|P36619|PMD1_SCHPO Leptomycin B resistance protein pmd1 OS=Schizosaccharomyces pombe (strain 972 / ATCC 24843) GN=pmd1 PE=2 SV=2//0
CADAFLAG00005267	AFLA_039400	884.597	1254.42	-0.50393	0.012204	sp|P00651|RNT1_ASPOR Guanyl-specific ribonuclease T1 OS=Aspergillus oryzae (strain ATCC 42149 / RIB 40) GN=rntA PE=1 SV=2//2.53034e-76
CADAFLAG00005283	AFLA_039560	5612.7	3537.49	0.66597	2.4834e-07	-//-
CADAFLAG00005313	AFLA_039860	0.750476	18.0808	-4.5905	0.013031	-//-
CADAFLAG00005314	AFLA_039870	118.884	1832.99	-3.9466	4.5862e-108	sp|P52291|PPA1_PICPA Acid phosphatase PHO1 OS=Komagataella pastoris GN=PHO1 PE=2 SV=1//4.94851e-12
CADAFLAG00005335	AFLA_040080	12.3568	106.287	-3.1046	0.0007665	sp|Q01262|HYUA_PSESN Hydantoin utilization protein A OS=Pseudomonas sp. (strain NS671) GN=hyuA PE=3 SV=1//2.45133e-105
CADAFLAG00005338	AFLA_040110	1542.75	4749.2	-1.6222	1.7097e-13	-//-
CADAFLAG00005346	AFLA_040190	73.5463	25.6045	1.5223	0.047658	sp|Q9ERI6|RDH14_MOUSE Retinol dehydrogenase 14 OS=Mus musculus GN=Rdh14 PE=1 SV=1//7.95744e-18
CADAFLAG00005353	AFLA_040260	853.438	1244.65	-0.54438	0.0055848	-//-
CADAFLAG00005363	AFLA_040360	226.865	79.1538	1.5191	0.00011634	-//-
CADAFLAG00005365	AFLA_040380	600.735	1043	-0.79593	4.1419e-05	sp|Q2U100|M2DH_ASPOR Mannitol 2-dehydrogenase OS=Aspergillus oryzae (strain ATCC 42149 / RIB 40) GN=AO090011000230 PE=3 SV=1//0
CADAFLAG00005366	AFLA_040390	499.336	245.901	1.0219	5.9578e-05	sp|P19807|HNM1_YEAST Choline transport protein OS=Saccharomyces cerevisiae (strain ATCC 204508 / S288c) GN=HNM1 PE=1 SV=1//5.16835e-32
CADAFLAG00005396	AFLA_040690	292.009	471.429	-0.69103	0.0192	-//-
CADAFLAG00005414	AFLA_040870	132.73	55.2533	1.2644	0.018366	-//-
CADAFLAG00005434	AFLA_041070	7.27366	53.0081	-2.8655	0.0009786	sp|P51844|PDC_ASPPA Pyruvate decarboxylase OS=Aspergillus parasiticus GN=pdcA PE=3 SV=1//2.5253e-172
CADAFLAG00005437	AFLA_041100	143.335	60.0144	1.256	0.01183	sp|P46950|SNG1_YEAST Nitrosoguanidine resistance protein SNG1 OS=Saccharomyces cerevisiae (strain ATCC 204508 / S288c) GN=SNG1 PE=1 SV=1//8.37588e-19
CADAFLAG00005455	AFLA_041280	361.699	718.412	-0.99002	7.7233e-06	sp|Q47PU3|PAMO_THEFY Phenylacetone monooxygenase OS=Thermobifida fusca (strain YX) GN=pamO PE=1 SV=1//1.04436e-122
CADAFLAG00005461	AFLA_041340	502.024	1049.07	-1.0633	3.6575e-05	sp|Q9WYG0|Y325_THEMA Uncharacterized oxidoreductase TM_0325 OS=Thermotoga maritima (strain ATCC 43589 / MSB8 / DSM 3109 / JCM 10099) GN=TM_0325 PE=3 SV=1//8.04268e-24
CADAFLAG00005468	AFLA_041410	62.8498	239.659	-1.931	1.0094e-07	sp|P25553|ALDA_ECOLI Lactaldehyde dehydrogenase OS=Escherichia coli (strain K12) GN=aldA PE=1 SV=2//1.47875e-18
CADAFLAG00005469	AFLA_041420	190.12	325.748	-0.77685	0.028368	sp|Q09686|YA14_SCHPO Putative glutamine amidotransferase-like protein C13C5.04 OS=Schizosaccharomyces pombe (strain 972 / ATCC 24843) GN=SPAC13C5.04 PE=2 SV=1//1.76809e-12
CADAFLAG00005470	AFLA_041430	213.888	552.087	-1.368	3.8029e-08	sp|P0C7B6|GLNA2_DICDI Type-1 glutamine synthetase 2 OS=Dictyostelium discoideum GN=glnA2 PE=1 SV=1//2.23935e-93
CADAFLAG00005471	AFLA_041440	1601.17	4651.58	-1.5386	1e-18	-//-
CADAFLAG00005483	AFLA_041560	142.762	301.155	-1.0769	0.001411	sp|Q9Y7X4|YGRG_SCHPO Uncharacterized membrane protein C365.16 OS=Schizosaccharomyces pombe (strain 972 / ATCC 24843) GN=SPBC365.16 PE=2 SV=1//3.28207e-41
CADAFLAG00005486	AFLA_041590	11028.6	15537.5	-0.49451	0.00010584	sp|Q01373|FOX2_NEUCR Peroxisomal hydratase-dehydrogenase-epimerase OS=Neurospora crassa (strain ATCC 24698 / 74-OR23-1A / CBS 708.71 / DSM 1257 / FGSC 987) GN=fox-2 PE=1 SV=1//5.42104e-47
CADAFLAG00005511	AFLA_041840	1034.47	2448.83	-1.2432	1.9504e-08	sp|B2J427|GCSP_NOSP7 Glycine dehydrogenase [decarboxylating] OS=Nostoc punctiforme (strain ATCC 29133 / PCC 73102) GN=gcvP PE=3 SV=1//0
CADAFLAG00005518	AFLA_041910	759.896	2355.55	-1.6322	5.3348e-26	sp|Q55CD9|NDH_DICDI Probable NADH dehydrogenase OS=Dictyostelium discoideum GN=DDB_G0270104 PE=3 SV=2//1.15254e-62
CADAFLAG00005522	AFLA_041950	855.724	478.673	0.83811	0.037295	sp|P49426|EXG1_COCCA Glucan 1,3-beta-glucosidase OS=Cochliobolus carbonum GN=EXG1 PE=1 SV=1//2.72546e-80
CADAFLAG00005524	AFLA_041970	2335.6	5200.41	-1.1548	2.726e-18	-//-
CADAFLAG00005527	AFLA_042000	436.713	1181.33	-1.4357	1.4958e-14	sp|O14075|YEAA_SCHPO Putative 2-hydroxyacid dehydrogenase UNK4.10 OS=Schizosaccharomyces pombe (strain 972 / ATCC 24843) GN=SPAC2E11.10 PE=2 SV=1//1.39168e-10
CADAFLAG00005528	AFLA_042010	435.021	1039.47	-1.2567	5.7395e-11	sp|P27867|DHSO_RAT Sorbitol dehydrogenase OS=Rattus norvegicus GN=Sord PE=1 SV=4//1.41298e-65
CADAFLAG00005529	AFLA_042020	230.141	426.486	-0.88998	0.0020991	sp|P51831|FABG_BACSU 3-oxoacyl-[acyl-carrier-protein] reductase FabG OS=Bacillus subtilis (strain 168) GN=fabG PE=3 SV=3//5.65554e-09
CADAFLAG00005531	AFLA_042040	501.453	1263.87	-1.3337	4.3252e-13	sp|P50842|KDUD_BACSU 2-dehydro-3-deoxy-D-gluconate 5-dehydrogenase OS=Bacillus subtilis (strain 168) GN=kduD PE=2 SV=1//4.35964e-71
CADAFLAG00005533	AFLA_042060	375.322	173.777	1.1109	9.6669e-05	sp|P43071|CDR1_CANAX Multidrug resistance protein CDR1 OS=Candida albicans GN=CDR1 PE=3 SV=1//2.16263e-08
CADAFLAG00005536	AFLA_042090	3661.46	1816.02	1.0116	1.2116e-11	sp|Q62009|POSTN_MOUSE Periostin OS=Mus musculus GN=Postn PE=1 SV=2//2.09156e-06
CADAFLAG00005546	AFLA_042190	609.206	329.275	0.88764	0.00013965	-//-
CADAFLAG00005547	AFLA_042200	341.91	192.2	0.83101	0.026369	-//-
CADAFLAG00005548	AFLA_042210	4700.58	3114.08	0.59403	0.01665	-//-
CADAFLAG00005563	AFLA_042360	198.227	2724.97	-3.781	3.9834e-120	-//-
CADAFLAG00005564	AFLA_042370	300.788	4672.15	-3.9573	3.921e-158	-//-
CADAFLAG00005566	AFLA_042390	4853.54	10312.6	-1.0873	3.2716e-18	sp|P17729|G3P1_TRIKO Glyceraldehyde-3-phosphate dehydrogenase 1 OS=Trichoderma koningii GN=gpd1 PE=1 SV=3//8.55186e-09
CADAFLAG00005581	AFLA_042540	266.374	767.528	-1.5268	2.3165e-08	-//-
CADAFLAG00005588	AFLA_042610	787.898	560.129	0.49225	0.041696	-//-
CADAFLAG00005600	AFLA_042730	795.213	380.802	1.0623	2.7868e-07	-//-
CADAFLAG00005602	AFLA_042750	163.092	38.9479	2.0661	1.6563e-05	-//-
CADAFLAG00005603	AFLA_042760	459.229	669.895	-0.54472	0.037841	sp|O31826|YNGI_BACSU Putative acyl-CoA synthetase YngI OS=Bacillus subtilis (strain 168) GN=yngI PE=3 SV=1//4.19189e-120
CADAFLAG00005617	AFLA_042900	452.615	952.252	-1.0731	7.6919e-08	-//-
CADAFLAG00005623	AFLA_042960	241.935	378.827	-0.64692	0.042318	-//-
CADAFLAG00005636	AFLA_043090	238.575	539.333	-1.1767	1.8848e-06	sp|P39932|STL1_YEAST Sugar transporter STL1 OS=Saccharomyces cerevisiae (strain ATCC 204508 / S288c) GN=STL1 PE=1 SV=2//1.71896e-08
CADAFLAG00005663	AFLA_043360	201.604	385.539	-0.93535	0.0021832	-//-
CADAFLAG00005665	AFLA_043380	255.726	844.65	-1.7238	4.1419e-05	sp|Q07651|FMP45_YEAST SUR7 family protein FMP45 OS=Saccharomyces cerevisiae (strain ATCC 204508 / S288c) GN=FMP45 PE=1 SV=1//3.00759e-27
CADAFLAG00005666	AFLA_043390	791.366	558.401	0.50304	0.039819	sp|P38788|SSZ1_YEAST Ribosome-associated complex subunit SSZ1 OS=Saccharomyces cerevisiae (strain ATCC 204508 / S288c) GN=SSZ1 PE=1 SV=2//8.77283e-11
CADAFLAG00005675	AFLA_043480	51.281	126.095	-1.298	0.017381	-//-
CADAFLAG00005677	AFLA_043500	461.986	279.348	0.72579	0.01212	-//-
CADAFLAG00005678	AFLA_043510	241.322	88.6759	1.4443	0.00010157	sp|P34112|CDK1_DICDI Cyclin-dependent kinase 1 OS=Dictyostelium discoideum GN=cdk1 PE=2 SV=1//9.80828e-10
CADAFLAG00005689	AFLA_043620	221.765	105.499	1.0718	0.0072849	sp|P53048|MAL11_YEAST General alpha-glucoside permease OS=Saccharomyces cerevisiae (strain ATCC 204508 / S288c) GN=MAL11 PE=1 SV=1//6.05271e-13
CADAFLAG00005690	AFLA_043630	117.579	963.312	-3.0344	1.2589e-05	-//-
CADAFLAG00005699	AFLA_043720	194.904	93.1902	1.0645	0.014211	sp|O13983|HRQ1_SCHPO Putative ATP-dependent helicase hrq1 OS=Schizosaccharomyces pombe (strain 972 / ATCC 24843) GN=hrq1 PE=2 SV=4//3.45272e-60
CADAFLAG00005712	AFLA_043850	13.2595	86.9006	-2.7123	3.1851e-05	sp|Q9KX40|ESTB_BURGA Esterase EstB OS=Burkholderia gladioli GN=estB PE=1 SV=1//4.37506e-14
CADAFLAG00005713	AFLA_043860	900.862	1651.15	-0.87409	1.5098e-07	-//-
CADAFLAG00005720	AFLA_043930	1134.73	770.927	0.55769	0.0055023	sp|Q8GSD9|PHT12_ORYSJ Inorganic phosphate transporter 1-2 OS=Oryza sativa subsp. japonica GN=PTH1-2 PE=2 SV=1//4.76077e-22
CADAFLAG00005724	AFLA_043970	470.911	679.441	-0.52889	0.043184	sp|Q1ZXF1|ECHM_DICDI Probable enoyl-CoA hydratase, mitochondrial OS=Dictyostelium discoideum GN=echs1 PE=3 SV=1//8.25835e-46
CADAFLAG00005725	AFLA_043980	5621.8	13638.9	-1.2786	2.3136e-25	sp|Q2U059|MTLD_ASPOR Mannitol-1-phosphate 5-dehydrogenase OS=Aspergillus oryzae (strain ATCC 42149 / RIB 40) GN=mpdA PE=3 SV=1//0
CADAFLAG00005734	AFLA_044070	580.759	858.791	-0.56437	0.013427	-//-
CADAFLAG00005740	AFLA_044130	310.634	589.037	-0.92314	0.00015453	sp|Q09702|NRD1_SCHPO Negative regulator of differentiation 1 OS=Schizosaccharomyces pombe (strain 972 / ATCC 24843) GN=nrd1 PE=1 SV=1//1.60344e-08
CADAFLAG00005744	AFLA_044170	4290.38	5730.87	-0.41765	0.006179	sp|P19115|RS14_NEUCR 40S ribosomal protein S14 OS=Neurospora crassa (strain ATCC 24698 / 74-OR23-1A / CBS 708.71 / DSM 1257 / FGSC 987) GN=rps-14 PE=3 SV=2//4.39513e-69
CADAFLAG00005767	AFLA_044400	1605.7	2358.89	-0.5549	0.00063796	sp|Q8L799|MIOX1_ARATH Inositol oxygenase 1 OS=Arabidopsis thaliana GN=MIOX1 PE=2 SV=1//5.18486e-80
CADAFLAG00005768	AFLA_044410	984.545	1811.02	-0.87927	1.0094e-07	sp|P14065|GCY_YEAST Protein GCY OS=Saccharomyces cerevisiae (strain ATCC 204508 / S288c) GN=GCY1 PE=1 SV=1//3.08187e-94
CADAFLAG00005773	AFLA_044460	191.598	326.512	-0.76906	0.029289	sp|Q54P79|4CL3_DICDI Probable 4-coumarate--CoA ligase 3 OS=Dictyostelium discoideum GN=4cl3 PE=3 SV=2//3.03068e-14
CADAFLAG00005777	AFLA_044500	888.069	2409.91	-1.4402	1.0257e-13	sp|Q4X1F8|NNRD_ASPFU ATP-dependent (S)-NAD(P)H-hydrate dehydratase OS=Neosartorya fumigata (strain ATCC MYA-4609 / Af293 / CBS 101355 / FGSC A1100) GN=AFUA_2G10120 PE=3 SV=1//7.92875e-09
CADAFLAG00005785	AFLA_044580	1550.63	4670.8	-1.5908	1.2116e-11	-//-
CADAFLAG00005789	AFLA_044620	1747.91	2378.17	-0.44422	0.0073497	sp|Q5B0C0|HSP7M_EMENI Heat shock 70 kDa protein OS=Emericella nidulans (strain FGSC A4 / ATCC 38163 / CBS 112.46 / NRRL 194 / M139) GN=AN6010 PE=1 SV=1//0
CADAFLAG00005791	AFLA_044640	1164.02	1563.53	-0.42569	0.024137	sp|O60135|LCF1_SCHPO Long-chain-fatty-acid--CoA ligase 1 OS=Schizosaccharomyces pombe (strain 972 / ATCC 24843) GN=lcf1 PE=2 SV=1//0
CADAFLAG00005799	AFLA_044720	464.098	251.156	0.88585	0.00083793	sp|C8V329|FCY2_EMENI Purine-cytosine permease fcyB OS=Emericella nidulans (strain FGSC A4 / ATCC 38163 / CBS 112.46 / NRRL 194 / M139) GN=fcyB PE=1 SV=1//1.58707e-25
CADAFLAG00005800	AFLA_044730	6645.39	11208.5	-0.75417	2.4e-09	sp|O06179|Y1533_MYCTU Putative monooxygenase Rv1533 OS=Mycobacterium tuberculosis GN=Rv1533 PE=3 SV=1//1.3964e-16
CADAFLAG00005804	AFLA_044770	1027.13	3178.41	-1.6297	2.208e-28	sp|Q2KIA9|ENOF1_BOVIN Mitochondrial enolase superfamily member 1 OS=Bos taurus GN=ENOSF1 PE=2 SV=1//3.25165e-63
CADAFLAG00005806	AFLA_044790	416.496	4090.16	-3.2958	3.0936e-14	sp|P10713|CON10_NEUCR Conidiation-specific protein 10 OS=Neurospora crassa (strain ATCC 24698 / 74-OR23-1A / CBS 708.71 / DSM 1257 / FGSC 987) GN=con-10 PE=2 SV=1//7.86127e-08
CADAFLAG00005807	AFLA_044800	233.083	789.677	-1.7604	7.3394e-16	-//-
CADAFLAG00005824	AFLA_044970	102.677	6.78325	3.92	1.0564e-07	sp|Q2TZY0|PLYB_ASPOR Probable pectate lyase B OS=Aspergillus oryzae (strain ATCC 42149 / RIB 40) GN=plyB PE=3 SV=1//0
CADAFLAG00005825	AFLA_044980	5.52199	85.3959	-3.9509	3.1286e-09	-//-
CADAFLAG00005829	AFLA_045020	2177.79	3348.62	-0.6207	7.9738e-05	sp|O42652|AATC_SCHPO Aspartate aminotransferase, cytoplasmic OS=Schizosaccharomyces pombe (strain 972 / ATCC 24843) GN=aat2 PE=2 SV=1//3.5298e-117
CADAFLAG00005837	AFLA_045100	1209.66	562.023	1.1059	2.233e-09	-//-
CADAFLAG00005851	AFLA_045240	364.613	596.091	-0.70917	0.004643	sp|O14050|YEYH_SCHPO Uncharacterized MscS family protein C2C4.17c OS=Schizosaccharomyces pombe (strain 972 / ATCC 24843) GN=SPAC2C4.17c PE=2 SV=1//4.57641e-102
CADAFLAG00005854	AFLA_045270	4747.18	3612.26	0.39417	0.0092551	sp|Q9Y757|CP52L_DEBHN Cytochrome P450 52A12 OS=Debaryomyces hansenii GN=CYP52A12 PE=2 SV=2//5.0013e-130
CADAFLAG00005856	AFLA_045290	1065.66	575.741	0.88826	2.2202e-06	sp|A1DME8|EGLB_NEOFI Probable endo-beta-1,4-glucanase B OS=Neosartorya fischeri (strain ATCC 1020 / DSM 3700 / FGSC A1164 / NRRL 181) GN=eglB PE=3 SV=1//1.49757e-21
CADAFLAG00005857	AFLA_045300	246.812	625.421	-1.3414	1.3011e-08	sp|Q29RZ5|CV025_BOVIN Uncharacterized protein C22orf25 homolog OS=Bos taurus PE=2 SV=1//3.04226e-15
CADAFLAG00005864	AFLA_045370	134.281	246.888	-0.87861	0.028696	sp|Q02357|ANK1_MOUSE Ankyrin-1 OS=Mus musculus GN=Ank1 PE=1 SV=2//6.64826e-17
CADAFLAG00005872	AFLA_045450	119.642	16.576	2.8516	1.8277e-06	sp|P28584|TRK2_YEAST Low-affinity potassium transport protein OS=Saccharomyces cerevisiae (strain ATCC 204508 / S288c) GN=TRK2 PE=1 SV=1//1.2338e-12
CADAFLAG00005883	AFLA_045560	132.692	53.478	1.3111	0.01107	sp|P36035|JEN1_YEAST Carboxylic acid transporter protein homolog OS=Saccharomyces cerevisiae (strain ATCC 204508 / S288c) GN=JEN1 PE=1 SV=1//1.37504e-59
CADAFLAG00005887	AFLA_045600	1354.9	2796.6	-1.0455	2.6046e-12	sp|P12015|CYMO_ACISP Cyclohexanone 1,2-monooxygenase OS=Acinetobacter sp. PE=1 SV=2//8.6595e-153
CADAFLAG00005889	AFLA_045620	1166.01	835.455	0.48094	0.019672	-//-
CADAFLAG00005909	AFLA_045820	509.486	747.496	-0.55302	0.026158	sp|Q9USN8|YJY1_SCHPO Uncharacterized protein C132.01c OS=Schizosaccharomyces pombe (strain 972 / ATCC 24843) GN=SPCC132.01c PE=1 SV=2//2.12594e-141
CADAFLAG00005923	AFLA_045960	64.7304	172.814	-1.4167	0.0014715	sp|Q03516|RSN1_YEAST Uncharacterized protein RSN1 OS=Saccharomyces cerevisiae (strain ATCC 204508 / S288c) GN=RSN1 PE=1 SV=1//1.39226e-12
CADAFLAG00005925	AFLA_045980	759.56	471.206	0.68881	0.0018306	sp|B8NBM3|DPP5_ASPFN Probable dipeptidyl-peptidase 5 OS=Aspergillus flavus (strain ATCC 200026 / FGSC A1120 / NRRL 3357 / JCM 12722 / SRRC 167) GN=dpp5 PE=3 SV=2//4.38525e-20
CADAFLAG00005930	AFLA_046030	244.12	627.643	-1.3624	1.1641e-08	sp|Q54NZ8|ISC1B_DICDI Isochorismatase family protein 1B OS=Dictyostelium discoideum GN=DDB_G0284901 PE=3 SV=1//5.07789e-23
CADAFLAG00005935	AFLA_046080	14.0709	61.5192	-2.1283	0.041092	-//-
CADAFLAG00005946	AFLA_046190	276.268	156.779	0.81734	0.03644	sp|P23516|HOXN_CUPNH High-affinity nickel transport protein OS=Cupriavidus necator (strain ATCC 17699 / H16 / DSM 428 / Stanier 337) GN=hoxN PE=1 SV=3//5.91386e-13
CADAFLAG00005948	AFLA_046210	520.206	286.871	0.85868	0.000911	-//-
CADAFLAG00005950	AFLA_046230	216.736	84.1617	1.3647	0.00066074	sp|P53388|DIP5_YEAST Dicarboxylic amino acid permease OS=Saccharomyces cerevisiae (strain ATCC 204508 / S288c) GN=DIP5 PE=1 SV=1//5.06961e-164
CADAFLAG00005964	AFLA_046370	423.538	242.374	0.80526	0.0045987	-//-
CADAFLAG00005979	AFLA_046520	471.346	765.155	-0.69897	0.0018839	sp|P53705|BUD4_CANAL Bud site selection protein BUD4 OS=Candida albicans (strain SC5314 / ATCC MYA-2876) GN=BUD4 PE=1 SV=2//2.94353e-47
CADAFLAG00005996	AFLA_046690	383.149	152.488	1.3292	5.1324e-06	-//-
CADAFLAG00006000	AFLA_046730	1940.91	3386.42	-0.80303	2.8734e-08	sp|Q10327|YD72_SCHPO Uncharacterized protein C32A11.02c OS=Schizosaccharomyces pombe (strain 972 / ATCC 24843) GN=SPAC32A11.02c PE=2 SV=1//8.88232e-14
CADAFLAG00006001	AFLA_046740	6920.79	12447.6	-0.84686	5.8243e-12	sp|Q6TU48|MAOX_DICDI NADP-dependent malic enzyme OS=Dictyostelium discoideum GN=malA PE=2 SV=1//1.90759e-149
CADAFLAG00006003	AFLA_046760	392.767	1344.75	-1.7756	3.4184e-22	sp|Q7Z8E7|GPD_COLGL Glycerol-3-phosphate dehydrogenase [NAD(+)] OS=Colletotrichum gloeosporioides PE=2 SV=1//8.02189e-155
CADAFLAG00006015	AFLA_046880	1146.49	1531.89	-0.41808	0.041127	-//-
CADAFLAG00006035	AFLA_047080	989.994	2606.05	-1.3964	2.7889e-20	sp|Q7S5N8|GLYM_NEUCR Putative serine hydroxymethyltransferase, mitochondrial OS=Neurospora crassa (strain ATCC 24698 / 74-OR23-1A / CBS 708.71 / DSM 1257 / FGSC 987) GN=NCU05805 PE=3 SV=1//1.72166e-17
CADAFLAG00006043	AFLA_047160	1186.2	2581.93	-1.1221	2.4384e-08	sp|Q8X0J4|CYB5L_NEUCR Putative cytochrome b5 B11H24.095 OS=Neurospora crassa (strain ATCC 24698 / 74-OR23-1A / CBS 708.71 / DSM 1257 / FGSC 987) GN=B11H24.095 PE=3 SV=1//2.86526e-23
CADAFLAG00006057	AFLA_047300	105.691	247.653	-1.2285	0.00086061	sp|O59790|ARK1_SCHPO Serine/threonine-protein kinase ark1 OS=Schizosaccharomyces pombe (strain 972 / ATCC 24843) GN=ark1 PE=1 SV=2//1.42543e-118
CADAFLAG00006068	AFLA_047410	3264.35	5298.3	-0.69873	2.5015e-07	sp|O59945|FIMB_SCHPO Fimbrin OS=Schizosaccharomyces pombe (strain 972 / ATCC 24843) GN=fim1 PE=1 SV=1//5.96064e-17
CADAFLAG00006075	AFLA_054660	414.085	700.061	-0.75755	0.0010715	sp|Q8NKB6|OPSB_ASPOR Probable aspartic-type endopeptidase opsB OS=Aspergillus oryzae (strain ATCC 42149 / RIB 40) GN=opsB PE=2 SV=1//1.68658e-26
CADAFLAG00006084	AFLA_054750	13269.8	17419.5	-0.39256	0.0036207	sp|O02640|MDHM_CAEEL Probable malate dehydrogenase, mitochondrial OS=Caenorhabditis elegans GN=mdh-1 PE=2 SV=1//5.63173e-06
CADAFLAG00006110	AFLA_055010	623.955	916.854	-0.55525	0.011943	sp|Q2U9G3|LYS4_ASPOR Homoaconitase, mitochondrial OS=Aspergillus oryzae (strain ATCC 42149 / RIB 40) GN=lys4 PE=3 SV=1//0
CADAFLAG00006111	AFLA_055020	643.552	436.796	0.5591	0.027549	sp|P16157|ANK1_HUMAN Ankyrin-1 OS=Homo sapiens GN=ANK1 PE=1 SV=3//6.13424e-10
CADAFLAG00006115	AFLA_055060	3295.18	12846.2	-1.9629	5.6849e-53	sp|Q03134|FDH_EMENI Probable formate dehydrogenase OS=Emericella nidulans (strain FGSC A4 / ATCC 38163 / CBS 112.46 / NRRL 194 / M139) GN=aciA PE=2 SV=3//5.66125e-18
CADAFLAG00006116	AFLA_055070	275.457	473.029	-0.7801	0.0041248	sp|P15181|SYLM_NEUCR Leucine--tRNA ligase, mitochondrial OS=Neurospora crassa (strain ATCC 24698 / 74-OR23-1A / CBS 708.71 / DSM 1257 / FGSC 987) GN=leu-5 PE=3 SV=1//1.64463e-08
CADAFLAG00006124	AFLA_055150	720.988	474.04	0.60497	0.012827	sp|Q9JLC8|SACS_MOUSE Sacsin OS=Mus musculus GN=Sacs PE=1 SV=2//6.23217e-07
CADAFLAG00006133	AFLA_055240	728.751	487.359	0.58044	0.018815	sp|Q99148|PUR2_YARLI Bifunctional purine biosynthetic protein ADE1 OS=Yarrowia lipolytica (strain CLIB 122 / E 150) GN=ADE1 PE=3 SV=1//3.27437e-22
CADAFLAG00006137	AFLA_055280	308.614	184.382	0.74311	0.040429	sp|P56090|HIS7_CANAX Imidazoleglycerol-phosphate dehydratase OS=Candida albicans GN=HIS3 PE=3 SV=1//6.96786e-84
CADAFLAG00006150	AFLA_055410	276.245	136.652	1.0154	0.0043807	sp|Q09177|RPAC2_SCHPO DNA-directed RNA polymerases I and III subunit RPAC2 OS=Schizosaccharomyces pombe (strain 972 / ATCC 24843) GN=rpc19 PE=2 SV=1//3.89388e-08
CADAFLAG00006154	AFLA_055450	5338.35	3993.47	0.41875	0.0045162	sp|P36008|EF1G2_YEAST Elongation factor 1-gamma 2 OS=Saccharomyces cerevisiae (strain ATCC 204508 / S288c) GN=TEF4 PE=1 SV=1//5.96151e-92
CADAFLAG00006169	AFLA_055600	1656.51	1217	0.44482	0.016447	sp|Q4WDE1|MTND_ASPFU 1,2-dihydroxy-3-keto-5-methylthiopentene dioxygenase OS=Neosartorya fumigata (strain ATCC MYA-4609 / Af293 / CBS 101355 / FGSC A1100) GN=adi1 PE=3 SV=2//3.10402e-14
CADAFLAG00006193	AFLA_055840	482.684	834.795	-0.79034	0.048031	sp|Q05871|ECI1_YEAST 3,2-trans-enoyl-CoA isomerase OS=Saccharomyces cerevisiae (strain ATCC 204508 / S288c) GN=ECI1 PE=1 SV=1//8.45885e-51
CADAFLAG00006196	AFLA_055870	156.551	269.061	-0.7813	0.032346	sp|O42997|YBC7_SCHPO Uncharacterized protein C27B12.07 OS=Schizosaccharomyces pombe (strain 972 / ATCC 24843) GN=pi071 PE=2 SV=1//1.00715e-09
CADAFLAG00006206	AFLA_055970	809.539	1294.8	-0.67756	0.00034118	sp|Q10058|YAM3_SCHPO Putative oxidoreductase C1F5.03c OS=Schizosaccharomyces pombe (strain 972 / ATCC 24843) GN=SPAC1F5.03c PE=2 SV=1//3.48627e-56
CADAFLAG00006216	AFLA_056070	590.428	1442.37	-1.2886	1.2565e-13	sp|Q8VZR6|INT1_ARATH Inositol transporter 1 OS=Arabidopsis thaliana GN=INT1 PE=1 SV=1//1.35591e-44
CADAFLAG00006226	AFLA_056170	1888.93	5033.69	-1.414	3.6675e-20	sp|P78574|CATA_ASPFU Catalase A OS=Neosartorya fumigata (strain ATCC MYA-4609 / Af293 / CBS 101355 / FGSC A1100) GN=catA PE=3 SV=2//1.66762e-20
CADAFLAG00006237	AFLA_056280	205.586	2616.4	-3.6698	3.2219e-14	-//-
CADAFLAG00006242	AFLA_056330	1037.88	550.678	0.91436	0.00011115	sp|P41390|PUR1_SCHPO Amidophosphoribosyltransferase OS=Schizosaccharomyces pombe (strain 972 / ATCC 24843) GN=ade4 PE=1 SV=1//2.57561e-13
CADAFLAG00006245	AFLA_056360	142.213	249.651	-0.81186	0.048143	-//-
CADAFLAG00006253	AFLA_056440	2037.11	1071.96	0.92627	2.2761e-08	-//-
CADAFLAG00006255	AFLA_056460	272.701	559.388	-1.0365	2.5984e-05	sp|P48027|GACS_PSESY Sensor protein GacS OS=Pseudomonas syringae pv. syringae GN=gacS PE=3 SV=1//3.62213e-45
CADAFLAG00006272	AFLA_056630	514.605	303.495	0.76179	0.0055552	sp|P72926|Y1024_SYNY3 UPF0187 protein sll1024 OS=Synechocystis sp. (strain PCC 6803 / Kazusa) GN=sll1024 PE=3 SV=2//5.73698e-08
CADAFLAG00006276	AFLA_056670	696.568	1956.05	-1.4896	2.5828e-20	sp|P14010|GABAT_EMENI 4-aminobutyrate aminotransferase OS=Emericella nidulans (strain FGSC A4 / ATCC 38163 / CBS 112.46 / NRRL 194 / M139) GN=gatA PE=3 SV=1//0
CADAFLAG00006289	AFLA_056800	1126.56	1768.79	-0.65084	0.00015919	sp|Q09912|PSI1_SCHPO Protein psi1 OS=Schizosaccharomyces pombe (strain 972 / ATCC 24843) GN=psi1 PE=2 SV=2//3.43532e-08
CADAFLAG00006291	AFLA_056820	326.229	1382.98	-2.0838	5.2114e-30	sp|Q9P885|GGPPS_MUCCL Geranylgeranyl pyrophosphate synthase OS=Mucor circinelloides f. lusitanicus GN=carG PE=1 SV=1//4.53295e-48
CADAFLAG00006294	AFLA_056850	861.994	1560.76	-0.85649	9.2523e-07	sp|Q2TBV3|ETFB_BOVIN Electron transfer flavoprotein subunit beta OS=Bos taurus GN=ETFB PE=2 SV=3//3.107e-68
CADAFLAG00006295	AFLA_056860	303.706	519.652	-0.77487	0.0044123	sp|Q4WU59|TAH18_ASPFU Probable NADPH reductase tah18 OS=Neosartorya fumigata (strain ATCC MYA-4609 / Af293 / CBS 101355 / FGSC A1100) GN=tah18 PE=3 SV=1//2.04502e-07
CADAFLAG00006307	AFLA_056980	5856.19	8898.54	-0.60361	2.739e-06	-//-
CADAFLAG00006334	AFLA_057250	66.3102	143.189	-1.1106	0.029543	-//-
CADAFLAG00006340	AFLA_057310	1466.35	3378.88	-1.2043	3.3273e-07	sp|P33363|BGLX_ECOLI Periplasmic beta-glucosidase OS=Escherichia coli (strain K12) GN=bglX PE=1 SV=2//5.75472e-11
CADAFLAG00006348	AFLA_057390	3286.06	2222.89	0.56392	0.00011125	sp|P40024|ARB1_YEAST ABC transporter ATP-binding protein ARB1 OS=Saccharomyces cerevisiae (strain ATCC 204508 / S288c) GN=ARB1 PE=1 SV=1//4.75915e-56
CADAFLAG00006350	AFLA_057410	742.492	1177.71	-0.66553	0.00080095	sp|O42896|YBQ3_SCHPO Uncharacterized oxidoreductase C115.03 OS=Schizosaccharomyces pombe (strain 972 / ATCC 24843) GN=SPBC115.03 PE=2 SV=1//2.16868e-39
CADAFLAG00006352	AFLA_057430	329.57	574.189	-0.80094	0.0016954	-//-
CADAFLAG00006365	AFLA_057560	32.89	100.738	-1.6149	0.0072414	-//-
CADAFLAG00006366	AFLA_057570	75.9445	248.369	-1.7095	0.0012891	-//-
CADAFLAG00006368	AFLA_057590	315.332	175.529	0.84516	0.0085227	-//-
CADAFLAG00006370	AFLA_057610	186.061	388.62	-1.0626	0.00022665	sp|Q9P7F2|CAO1_SCHPO Copper amine oxidase 1 OS=Schizosaccharomyces pombe (strain 972 / ATCC 24843) GN=cao1 PE=1 SV=1//9.16172e-19
CADAFLAG00006373	AFLA_057640	792.231	475.791	0.73559	0.00083793	sp|O13982|YEC8_SCHPO Uncharacterized WD repeat-containing protein C25H1.08c OS=Schizosaccharomyces pombe (strain 972 / ATCC 24843) GN=SPAC25H1.08c PE=2 SV=1//1.33954e-33
CADAFLAG00006374	AFLA_057650	405.289	804.724	-0.98955	5.3579e-06	sp|C8VTR6|Y0074_EMENI Putative acyl-coenzyme A synthetase OS=Emericella nidulans (strain FGSC A4 / ATCC 38163 / CBS 112.46 / NRRL 194 / M139) GN=AN10074 PE=3 SV=1//1.53364e-06
CADAFLAG00006383	AFLA_057740	778.094	1084.07	-0.47844	0.031207	sp|P42041|ALDH_ALTAL Aldehyde dehydrogenase OS=Alternaria alternata GN=ALTA10 PE=1 SV=2//3.59454e-151
CADAFLAG00006386	AFLA_057770	664.413	1088.09	-0.71165	0.00035412	sp|Q2U8R6|PLYA_ASPOR Probable pectate lyase A OS=Aspergillus oryzae (strain ATCC 42149 / RIB 40) GN=plyA PE=3 SV=1//0
CADAFLAG00006403	AFLA_057940	116.961	221.013	-0.91811	0.02974	sp|Q5ZID0|NMRL1_CHICK NmrA-like family domain-containing protein 1 OS=Gallus gallus GN=NMRAL1 PE=2 SV=1//1.08786e-07
CADAFLAG00006407	AFLA_057980	1207.56	2835.23	-1.2314	1.5513e-16	-//-
CADAFLAG00006425	AFLA_058160	243.081	691.374	-1.508	7.9181e-06	sp|B4EJA6|1A1D_BURCJ 1-aminocyclopropane-1-carboxylate deaminase OS=Burkholderia cepacia (strain J2315 / LMG 16656) GN=acdS PE=3 SV=1//1.31429e-120
CADAFLAG00006427	AFLA_058180	163.587	47.2122	1.7928	9.2184e-05	sp|Q9RA05|LIMC_RHOER (-)-trans-carveol dehydrogenase OS=Rhodococcus erythropolis GN=limC PE=1 SV=1//1.42856e-15
CADAFLAG00006430	AFLA_058210	645.253	139.391	2.2107	1.0192e-20	sp|P51853|BZNB_PSEFL Benzaldehyde lyase OS=Pseudomonas fluorescens GN=bznB PE=1 SV=1//3.53416e-57
CADAFLAG00006440	AFLA_058310	2995.05	4662.47	-0.63851	4.8648e-06	sp|P0CL53|FADH_ASPOR S-(hydroxymethyl)glutathione dehydrogenase OS=Aspergillus oryzae (strain ATCC 42149 / RIB 40) GN=FDH1 PE=3 SV=1//2.44757e-08
CADAFLAG00006445	AFLA_058360	228.971	127.847	0.84075	0.041729	-//-
CADAFLAG00006457	AFLA_058480	13362.1	10803.5	0.30665	0.038914	sp|B0XT72|GEL1_ASPFC 1,3-beta-glucanosyltransferase gel1 OS=Neosartorya fumigata (strain CEA10 / CBS 144.89 / FGSC A1163) GN=gel1 PE=1 SV=1//0
CADAFLAG00006464	AFLA_058550	1018.59	538.003	0.92089	8.7041e-07	sp|Q12753|HAA1_YEAST Transcriptional activator HAA1 OS=Saccharomyces cerevisiae (strain ATCC 204508 / S288c) GN=HAA1 PE=1 SV=1//1.89571e-11
CADAFLAG00006468	AFLA_058590	1265.71	3855.59	-1.607	2.4151e-15	sp|P0CL20|HOGA1_COCIM Putative 4-hydroxy-2-oxoglutarate aldolase, mitochondrial OS=Coccidioides immitis (strain RS) GN=CIMG_00151 PE=3 SV=1//1.86597e-161
CADAFLAG00006469	AFLA_058600	80.3022	579.738	-2.8519	4.7357e-29	sp|P00724|INV2_YEAST Invertase 2 OS=Saccharomyces cerevisiae (strain ATCC 204508 / S288c) GN=SUC2 PE=1 SV=1//9.14737e-81
CADAFLAG00006472	AFLA_058630	395.475	1411.15	-1.8352	1.808e-24	sp|P53839|GOR1_YEAST Glyoxylate reductase 1 OS=Saccharomyces cerevisiae (strain ATCC 204508 / S288c) GN=GOR1 PE=1 SV=1//2.17671e-33
CADAFLAG00006475	AFLA_058660	356.372	211.515	0.75262	0.022006	sp|P22189|ATC3_SCHPO Calcium-transporting ATPase 3 OS=Schizosaccharomyces pombe (strain 972 / ATCC 24843) GN=cta3 PE=1 SV=1//6.15977e-50
CADAFLAG00006493	AFLA_058840	806.159	220.297	1.8716	7.9513e-19	-//-
CADAFLAG00006494	AFLA_058850	367.355	118.325	1.6344	4.6434e-08	sp|P38734|MUP3_YEAST Low-affinity methionine permease OS=Saccharomyces cerevisiae (strain ATCC 204508 / S288c) GN=MUP3 PE=1 SV=1//1.37766e-09
CADAFLAG00006495	AFLA_058860	694.387	352.658	0.97747	8.517e-06	sp|Q9P7F4|YKK1_SCHPO Zinc-type alcohol dehydrogenase-like protein C2E1P3.01 OS=Schizosaccharomyces pombe (strain 972 / ATCC 24843) GN=SPAC2E1P3.01 PE=2 SV=1//3.6121e-07
CADAFLAG00006496	AFLA_058870	835.852	393.604	1.0865	7.8029e-08	sp|E9JFX9|DMOA_HYPSL Dimethyl-sulfide monooxygenase OS=Hyphomicrobium sulfonivorans GN=dmoA PE=1 SV=1//1.0132e-136
CADAFLAG00006497	AFLA_058880	1146.07	569.969	1.0077	2.6237e-08	sp|Q00730|STCW_EMENI Putative sterigmatocystin biosynthesis monooxygenase stcW OS=Emericella nidulans (strain FGSC A4 / ATCC 38163 / CBS 112.46 / NRRL 194 / M139) GN=stcW PE=3 SV=2//7.60284e-09
CADAFLAG00006498	AFLA_058890	307.942	72.3468	2.0897	4.5918e-10	sp|Q06433|GAL80_KLULA Galactose/lactose metabolism regulatory protein GAL80 OS=Kluyveromyces lactis (strain ATCC 8585 / CBS 2359 / DSM 70799 / NBRC 1267 / NRRL Y-1140 / WM37) GN=GAL80 PE=1 SV=1//1.81073e-10
CADAFLAG00006509	AFLA_059000	94.2388	9.79275	3.2665	4.9564e-06	sp|Q9US44|YIZG_SCHPO Uncharacterized transporter C1002.16c OS=Schizosaccharomyces pombe (strain 972 / ATCC 24843) GN=SPAC1002.16c PE=2 SV=1//1.08848e-37
CADAFLAG00006510	AFLA_059010	108.256	27.6267	1.9703	0.00099309	sp|Q10097|YAOI_SCHPO Uncharacterized transporter C11D3.18C OS=Schizosaccharomyces pombe (strain 972 / ATCC 24843) GN=SPAC11D3.18c PE=2 SV=1//3.01045e-34
CADAFLAG00006521	AFLA_059120	138.4	558.448	-2.0126	5.3642e-16	sp|O06724|YISK_BACSU Uncharacterized protein YisK OS=Bacillus subtilis (strain 168) GN=yisK PE=2 SV=1//2.62106e-25
CADAFLAG00006554	AFLA_059450	1558.44	2362.96	-0.6005	0.00025897	sp|O14297|YF1F_SCHPO Uncharacterized protein C9E9.15 OS=Schizosaccharomyces pombe (strain 972 / ATCC 24843) GN=SPAC9E9.15 PE=2 SV=2//4.68025e-37
CADAFLAG00006555	AFLA_059460	55.6621	2114.43	-5.2474	1.4957e-36	-//-
CADAFLAG00006559	AFLA_059500	204.318	464.869	-1.186	0.0010087	sp|Q2U8C6|ABNA_ASPOR Probable arabinan endo-1,5-alpha-L-arabinosidase A OS=Aspergillus oryzae (strain ATCC 42149 / RIB 40) GN=abnA PE=3 SV=1//6.05096e-09
CADAFLAG00006566	AFLA_059570	24.762	147.926	-2.5787	1.1025e-07	sp|Q01578|GNL_ZYMMO Gluconolactonase OS=Zymomonas mobilis subsp. mobilis (strain ATCC 31821 / ZM4 / CP4) GN=gnl PE=1 SV=2//1.25957e-14
CADAFLAG00006584	AFLA_059750	297.178	159.494	0.89782	0.0088257	sp|Q9NS00|C1GLT_HUMAN Glycoprotein-N-acetylgalactosamine 3-beta-galactosyltransferase 1 OS=Homo sapiens GN=C1GALT1 PE=1 SV=1//2.12265e-06
CADAFLAG00006587	AFLA_059780	13.0159	293.161	-4.4933	1.4539e-34	-//-
CADAFLAG00006588	AFLA_059790	102.118	1070.73	-3.3903	1.7008e-59	sp|P0CL53|FADH_ASPOR S-(hydroxymethyl)glutathione dehydrogenase OS=Aspergillus oryzae (strain ATCC 42149 / RIB 40) GN=FDH1 PE=3 SV=1//0
CADAFLAG00006589	AFLA_059800	109.909	1226.6	-3.4803	2.2414e-16	sp|P0CL54|GFA_ASPOR Putative glutathione-dependent formaldehyde-activating enzyme OS=Aspergillus oryzae (strain ATCC 42149 / RIB 40) GN=AO090701000508-B PE=3 SV=1//7.77596e-141
CADAFLAG00006606	AFLA_059970	976.62	613.948	0.66968	0.0011185	sp|P31808|YCIK_ECOLI Uncharacterized oxidoreductase YciK OS=Escherichia coli (strain K12) GN=yciK PE=1 SV=3//3.3082e-16
CADAFLAG00006608	AFLA_059990	100.839	21.0903	2.2574	0.00032245	sp|Q0VZ69|THAL_CHOCO Tryptophan 2-halogenase OS=Chondromyces crocatus GN=cmdE PE=4 SV=1//1.48242e-40
CADAFLAG00006613	AFLA_060040	368.469	171.11	1.1066	0.031253	-//-
CADAFLAG00006614	AFLA_060050	794.18	344.935	1.2031	9.6537e-09	sp|P19807|HNM1_YEAST Choline transport protein OS=Saccharomyces cerevisiae (strain ATCC 204508 / S288c) GN=HNM1 PE=1 SV=1//9.85752e-53
CADAFLAG00006620	AFLA_060110	12.5879	80.6348	-2.6794	5.8328e-05	-//-
CADAFLAG00006628	AFLA_060190	8.11549	55.747	-2.7801	0.0013508	-//-
CADAFLAG00006629	AFLA_060200	32.7002	132.114	-2.0144	7.8156e-05	sp|P38680|MTR_NEUCR N amino acid transport system protein OS=Neurospora crassa (strain ATCC 24698 / 74-OR23-1A / CBS 708.71 / DSM 1257 / FGSC 987) GN=mtr PE=3 SV=2//5.86607e-24
CADAFLAG00006635	AFLA_060260	1483.6	461.095	1.686	1.2391e-24	sp|P40920|HSP30_EMENI 30 kDa heat shock protein OS=Emericella nidulans (strain FGSC A4 / ATCC 38163 / CBS 112.46 / NRRL 194 / M139) GN=hsp30 PE=2 SV=1//1.74491e-64
CADAFLAG00006636	AFLA_060270	770.247	1409.49	-0.87178	5.5718e-07	sp|O35459|ECH1_MOUSE Delta(3,5)-Delta(2,4)-dienoyl-CoA isomerase, mitochondrial OS=Mus musculus GN=Ech1 PE=2 SV=1//6.92909e-70
CADAFLAG00006639	AFLA_060300	1306.62	2423.85	-0.89146	3.7411e-09	sp|P38674|ILV5_NEUCR Ketol-acid reductoisomerase, mitochondrial OS=Neurospora crassa (strain ATCC 24698 / 74-OR23-1A / CBS 708.71 / DSM 1257 / FGSC 987) GN=ilv-2 PE=3 SV=2//0
CADAFLAG00006651	AFLA_060420	167.602	72.8167	1.2027	0.0073865	sp|O43062|YGT9_SCHPO Uncharacterized protein C4C3.09 OS=Schizosaccharomyces pombe (strain 972 / ATCC 24843) GN=SPBC4C3.09 PE=2 SV=1//4.35406e-19
CADAFLAG00006652	AFLA_060430	50.7687	5.2785	3.2657	0.0030517	-//-
CADAFLAG00006658	AFLA_060490	2572.03	1927.24	0.41637	0.01511	sp|O07220|Y1812_MYCTU NADH dehydrogenase-like protein Rv1812c/MT1860 OS=Mycobacterium tuberculosis GN=Rv1812c PE=2 SV=1//1.43802e-50
CADAFLAG00006668	AFLA_060590	903.541	653.342	0.46775	0.04551	sp|P54267|CHSG_ASPFU Chitin synthase G OS=Neosartorya fumigata (strain ATCC MYA-4609 / Af293 / CBS 101355 / FGSC A1100) GN=chsG PE=2 SV=2//6.50611e-20
CADAFLAG00006671	AFLA_060620	4390.1	2634.65	0.73664	2.4327e-08	-//-
CADAFLAG00006677	AFLA_060680	25.1274	145.163	-2.5303	2.0364e-07	sp|Q4WYG3|7DMAW_ASPFU 7-dimethylallyltryptophan synthase OS=Neosartorya fumigata (strain ATCC MYA-4609 / Af293 / CBS 101355 / FGSC A1100) GN=etpPT PE=1 SV=2//2.28796e-44
CADAFLAG00006678	AFLA_060690	48.315	254.953	-2.3997	2.7561e-11	sp|P30607|CP52B_CANTR Cytochrome P450 52A2 OS=Candida tropicalis GN=CYP52A2 PE=1 SV=1//1.66772e-84
CADAFLAG00006686	AFLA_060770	11.0995	81.8927	-2.8832	1.4968e-05	sp|Q24JP1|ALCS_ASPFU Protein alcS OS=Neosartorya fumigata (strain ATCC MYA-4609 / Af293 / CBS 101355 / FGSC A1100) GN=alcS PE=3 SV=1//5.67025e-07
CADAFLAG00006694	AFLA_060850	134.286	42.2043	1.6698	0.0015947	sp|P39109|YCFI_YEAST Metal resistance protein YCF1 OS=Saccharomyces cerevisiae (strain ATCC 204508 / S288c) GN=YCF1 PE=1 SV=2//1.14797e-52
CADAFLAG00006698	AFLA_060890	239.637	419.75	-0.80868	0.0053318	sp|Q10074|AVT3_SCHPO Vacuolar amino acid transporter 3 OS=Schizosaccharomyces pombe (strain 972 / ATCC 24843) GN=avt3 PE=1 SV=1//7.75049e-98
CADAFLAG00006713	AFLA_061040	888.673	1687.51	-0.92517	2.8348e-08	sp|Q01336|YCR2_ESCVU Uncharacterized family 31 glucosidase ORF2 (Fragment) OS=Escherichia vulneris PE=3 SV=1//3.91263e-70
CADAFLAG00006720	AFLA_061110	344.132	1417.06	-2.0419	4.8122e-30	sp|P61869|MDLA_PENCY Mono- and diacylglycerol lipase OS=Penicillium cyclopium GN=mdlA PE=3 SV=1//1.53257e-13
CADAFLAG00006724	AFLA_061150	135.971	285.86	-1.072	0.0017462	sp|P12311|ADH1_GEOSE Alcohol dehydrogenase OS=Geobacillus stearothermophilus GN=adhT PE=1 SV=2//2.47687e-50
CADAFLAG00006732	AFLA_061230	942.118	1557.01	-0.72479	4.3207e-05	sp|P32573|SPS19_YEAST Peroxisomal 2,4-dienoyl-CoA reductase SPS19 OS=Saccharomyces cerevisiae (strain ATCC 204508 / S288c) GN=SPS19 PE=1 SV=4//3.38021e-07
CADAFLAG00006733	AFLA_061240	466.399	746.732	-0.67903	0.0038792	-//-
CADAFLAG00006736	AFLA_061270	44.5626	5.52533	3.0117	0.010063	sp|Q9C0Y6|YKM8_SCHPO Zinc-type alcohol dehydrogenase-like protein PB24D3.08c OS=Schizosaccharomyces pombe (strain 972 / ATCC 24843) GN=SPAPB24D3.08c PE=2 SV=1//1.94307e-75
CADAFLAG00006741	AFLA_061320	148.846	260.009	-0.80474	0.031954	sp|Q9KWU4|PYC_BACSU Pyruvate carboxylase OS=Bacillus subtilis (strain 168) GN=pyc PE=3 SV=1//3.22023e-107
CADAFLAG00006782	AFLA_061730	30.4362	103.477	-1.7654	0.0031496	-//-
CADAFLAG00006783	AFLA_061740	275.642	465.41	-0.75571	0.008442	sp|O74977|VMS1_SCHPO VMS1 homolog C1827.04 OS=Schizosaccharomyces pombe (strain 972 / ATCC 24843) GN=SPCC1827.04 PE=1 SV=1//5.03441e-69
CADAFLAG00006798	AFLA_061890	476.037	817.128	-0.77949	0.00029372	-//-
CADAFLAG00006806	AFLA_061970	419.236	1063.64	-1.3432	1.4791e-10	-//-
CADAFLAG00006808	AFLA_061990	101.939	281.346	-1.4646	1.2058e-05	sp|C8VDI1|Y1006_EMENI Uncharacterized protein AN11006 OS=Emericella nidulans (strain FGSC A4 / ATCC 38163 / CBS 112.46 / NRRL 194 / M139) GN=AN11006 PE=4 SV=1//5.55669e-62
CADAFLAG00006814	AFLA_062050	87.9968	31.6473	1.4754	0.037295	sp|Q9C0U9|YQD3_SCHPO Uncharacterized transporter PB1C11.03 OS=Schizosaccharomyces pombe (strain 972 / ATCC 24843) GN=SPCPB1C11.03 PE=1 SV=1//3.8604e-174
CADAFLAG00006819	AFLA_062100	2746.24	5052.67	-0.87959	5.3935e-11	sp|Q9X0Y1|P1254_THEMA Phosphorylated carbohydrates phosphatase TM_1254 OS=Thermotoga maritima (strain ATCC 43589 / MSB8 / DSM 3109 / JCM 10099) GN=TM_1254 PE=1 SV=1//8.75748e-10
CADAFLAG00006826	AFLA_062170	430.446	1416.12	-1.718	0.002374	sp|Q4WUG4|NNRE_ASPFU NAD(P)H-hydrate epimerase OS=Neosartorya fumigata (strain ATCC MYA-4609 / Af293 / CBS 101355 / FGSC A1100) GN=AFUA_5G08360 PE=3 SV=2//2.10313e-30
CADAFLAG00006831	AFLA_062220	1099.33	717.377	0.61582	0.0015838	sp|Q2U7N9|SHO1_ASPOR High osmolarity signaling protein sho1 OS=Aspergillus oryzae (strain ATCC 42149 / RIB 40) GN=sho1 PE=3 SV=1//2.25876e-22
CADAFLAG00006855	AFLA_062460	278.106	643.056	-1.2093	1.7104e-07	sp|Q12207|NCE2_YEAST Non-classical export protein 2 OS=Saccharomyces cerevisiae (strain ATCC 204508 / S288c) GN=NCE102 PE=1 SV=1//1.8961e-18
CADAFLAG00006876	AFLA_062670	222.937	128.07	0.7997	0.049753	sp|A1CFJ6|NOP16_ASPCL Nucleolar protein 16 OS=Aspergillus clavatus (strain ATCC 1007 / CBS 513.65 / DSM 816 / NCTC 3887 / NRRL 1) GN=nop16 PE=3 SV=1//1.02796e-78
CADAFLAG00006902	AFLA_062930	250.29	894.53	-1.8375	5.417e-19	sp|P82594|ABF2_STRCX Alpha-N-arabinofuranosidase 2 OS=Streptomyces chartreusis PE=1 SV=1//3.29268e-11
CADAFLAG00006913	AFLA_063040	73.9313	236.896	-1.68	3.8723e-06	sp|Q2UDK7|BGLM_ASPOR Probable beta-glucosidase M OS=Aspergillus oryzae (strain ATCC 42149 / RIB 40) GN=bglM PE=3 SV=1//1.59889e-77
CADAFLAG00006925	AFLA_063160	7.84684	79.1538	-3.3345	0.0026373	sp|Q9SUC0|3HIDH_ARATH Probable 3-hydroxyisobutyrate dehydrogenase, mitochondrial OS=Arabidopsis thaliana GN=At4g20930 PE=2 SV=3//1.02066e-06
CADAFLAG00006932	AFLA_063230	82.4139	204.191	-1.309	0.0015838	sp|Q08777|MCH5_YEAST Riboflavin transporter MCH5 OS=Saccharomyces cerevisiae (strain ATCC 204508 / S288c) GN=MCH5 PE=1 SV=2//1.04532e-16
CADAFLAG00006934	AFLA_063250	72.4858	209.74	-1.5328	0.00010729	sp|Q16769|QPCT_HUMAN Glutaminyl-peptide cyclotransferase OS=Homo sapiens GN=QPCT PE=1 SV=1//3.83428e-35
CADAFLAG00006935	AFLA_063260	5175.72	31476.2	-2.6044	4.2266e-35	-//-
CADAFLAG00006936	AFLA_063270	604.332	2599.33	-2.1047	6.1358e-07	-//-
CADAFLAG00006937	AFLA_063280	127.94	551.029	-2.1067	1.3017e-11	-//-
CADAFLAG00006938	AFLA_063290	197.587	915.032	-2.2113	6.4784e-26	-//-
CADAFLAG00006939	AFLA_063300	267.596	1537.71	-2.5227	1.9842e-44	-//-
CADAFLAG00006940	AFLA_063310	442.581	1397.83	-1.6592	1.7819e-20	-//-
CADAFLAG00006941	AFLA_063320	900.811	2909.15	-1.6913	0.00063858	-//-
CADAFLAG00006942	AFLA_063330	20.6245	106.239	-2.3649	4.5631e-05	sp|Q9ULJ7|ANR50_HUMAN Ankyrin repeat domain-containing protein 50 OS=Homo sapiens GN=ANKRD50 PE=1 SV=4//2.47035e-06
CADAFLAG00006951	AFLA_063420	3.89922	29.1314	-2.9013	0.033406	-//-
CADAFLAG00006958	AFLA_063490	178.447	747.297	-2.0662	2.6284e-20	sp|Q2U7D2|AXHA_ASPOR Probable alpha-L-arabinofuranosidase axhA OS=Aspergillus oryzae (strain ATCC 42149 / RIB 40) GN=axhA PE=3 SV=1//7.09269e-10
CADAFLAG00006960	AFLA_063510	17.4328	84.1379	-2.271	0.000625	sp|B8NER4|XYNF1_ASPFN Probable endo-1,4-beta-xylanase F1 OS=Aspergillus flavus (strain ATCC 200026 / FGSC A1120 / NRRL 3357 / JCM 12722 / SRRC 167) GN=xynF1 PE=3 SV=1//0
CADAFLAG00007016	AFLA_131370	1301.6	2544.61	-0.96716	2.8264e-10	sp|O14081|TPSX_SCHPO Putative alpha,alpha-trehalose-phosphate synthase [UDP-forming] 106 kDa subunit OS=Schizosaccharomyces pombe (strain 972 / ATCC 24843) GN=SPAC2E11.16c PE=1 SV=1//0
CADAFLAG00007017	AFLA_131380	129.036	257.939	-0.99925	0.0075681	-//-
CADAFLAG00007018	AFLA_131390	148.375	381.59	-1.3628	2.0383e-06	-//-
CADAFLAG00007019	AFLA_131400	1228.82	1993.03	-0.69769	1.4748e-05	-//-
CADAFLAG00007043	AFLA_131640	949.86	684.814	0.472	0.046879	sp|Q04635|ESC1_SCHPO Protein esc1 OS=Schizosaccharomyces pombe (strain 972 / ATCC 24843) GN=esc1 PE=2 SV=1//6.22984e-11
CADAFLAG00007049	AFLA_131700	810.692	384.998	1.0743	8.5652e-08	sp|P54989|NTAA_CHEHE Nitrilotriacetate monooxygenase component A OS=Chelatobacter heintzii GN=ntaA PE=1 SV=2//1.99902e-140
CADAFLAG00007056	AFLA_131770	687.346	1563.95	-1.1861	0.0040338	sp|B8NG16|PGLRX_ASPFN Probable exopolygalacturonase X OS=Aspergillus flavus (strain ATCC 200026 / FGSC A1120 / NRRL 3357 / JCM 12722 / SRRC 167) GN=pgaX PE=3 SV=1//0
CADAFLAG00007072	AFLA_131930	18.794	375.77	-4.3215	1.9013e-40	-//-
CADAFLAG00007082	AFLA_132030	494.281	301.943	0.71106	0.010557	sp|O59829|YCU9_SCHPO Probable nitrilase C965.09 OS=Schizosaccharomyces pombe (strain 972 / ATCC 24843) GN=SPCC965.09 PE=2 SV=1//6.51502e-15
CADAFLAG00007104	AFLA_132250	733.361	397.425	0.88384	6.5113e-05	sp|Q09752|FNX1_SCHPO Multidrug resistance protein fnx1 OS=Schizosaccharomyces pombe (strain 972 / ATCC 24843) GN=fnx1 PE=2 SV=2//2.43291e-40
CADAFLAG00007113	AFLA_132340	384.583	133.643	1.5249	1.5613e-07	-//-
CADAFLAG00007118	AFLA_132390	1273.8	2170.63	-0.76898	8.5305e-07	sp|Q9P7B4|YI13_SCHPO Uncharacterized oxidoreductase C521.03 OS=Schizosaccharomyces pombe (strain 972 / ATCC 24843) GN=SPAC521.03 PE=1 SV=1//9.02584e-20
CADAFLAG00007128	AFLA_132490	246.414	423.182	-0.78019	0.027354	sp|P24552|OXDA_FUSSO D-amino-acid oxidase OS=Fusarium solani subsp. pisi PE=1 SV=1//2.67626e-13
CADAFLAG00007133	AFLA_132540	1049.21	1477.11	-0.49348	0.012587	sp|P29429|THIO_EMENI Thioredoxin OS=Emericella nidulans (strain FGSC A4 / ATCC 38163 / CBS 112.46 / NRRL 194 / M139) GN=TRX1 PE=1 SV=2//5.67837e-43
CADAFLAG00007145	AFLA_132660	148.296	276.044	-0.89642	0.014054	-//-
CADAFLAG00007154	AFLA_132750	700.939	434.304	0.69058	0.0028857	-//-
CADAFLAG00007156	AFLA_132770	151.122	68.8436	1.1343	0.031453	sp|C5FGX1|SCPB_ARTOC Carboxypeptidase S1 homolog B OS=Arthroderma otae (strain ATCC MYA-4605 / CBS 113480) GN=SCPB PE=3 SV=1//2.15005e-104
CADAFLAG00007166	AFLA_132870	1845.36	957.578	0.94644	1.2803e-09	sp|Q02979|GDE1_YEAST Glycerophosphodiester phosphodiesterase GDE1 OS=Saccharomyces cerevisiae (strain ATCC 204508 / S288c) GN=GDE1 PE=1 SV=1//9.26484e-37
CADAFLAG00007172	AFLA_132930	257.79	430.482	-0.73976	0.015461	sp|O74903|YCS3_SCHPO Uncharacterized calcium-binding protein C613.03 OS=Schizosaccharomyces pombe (strain 972 / ATCC 24843) GN=SPCC613.03 PE=2 SV=1//1.02594e-29
CADAFLAG00007182	AFLA_133030	1080.95	1473.19	-0.44664	0.024456	sp|P06809|COX4_NEUCR Cytochrome c oxidase subunit 4, mitochondrial OS=Neurospora crassa (strain ATCC 24698 / 74-OR23-1A / CBS 708.71 / DSM 1257 / FGSC 987) GN=cox-4 PE=3 SV=2//4.37677e-57
CADAFLAG00007226	AFLA_133470	399.235	634.967	-0.66945	0.0082201	sp|O74509|VAM7_SCHPO Vacuolar morphogenesis protein 7 homolog OS=Schizosaccharomyces pombe (strain 972 / ATCC 24843) GN=SPCC594.06c PE=2 SV=1//1.89031e-23
CADAFLAG00007241	AFLA_133620	13344.5	4708.99	1.5028	1.7409e-44	-//-
CADAFLAG00007260	AFLA_133810	170.094	422.218	-1.3117	3.1447e-06	-//-
CADAFLAG00007273	AFLA_133940	15006.4	7367.72	1.0263	1.0935e-20	sp|P0CL19|RPIB_COCIM Putative ribose 5-phosphate isomerase OS=Coccidioides immitis (strain RS) GN=CIMG_07932 PE=1 SV=1//9.39936e-84
CADAFLAG00007274	AFLA_133950	1273.3	437.807	1.5402	7.5254e-19	sp|P0CL22|TPIS_COCIM Putative triosephosphate isomerase OS=Coccidioides immitis (strain RS) GN=CIMG_07933 PE=1 SV=1//8.20867e-125
CADAFLAG00007288	AFLA_134090	851.711	2341.15	-1.4588	4.2046e-21	sp|P55251|LEUC_RHIPU 3-isopropylmalate dehydratase OS=Rhizomucor pusillus GN=LEUA PE=3 SV=1//0
CADAFLAG00007292	AFLA_134130	898.311	594.904	0.59456	0.0079653	sp|Q10258|MTHR1_SCHPO Methylenetetrahydrofolate reductase 1 OS=Schizosaccharomyces pombe (strain 972 / ATCC 24843) GN=met9 PE=1 SV=1//0
CADAFLAG00007297	AFLA_134180	701.781	1611.37	-1.1992	1.3081e-12	sp|P33291|THIKB_CANTR 3-ketoacyl-CoA thiolase B, peroxisomal OS=Candida tropicalis PE=3 SV=1//2.93219e-80
CADAFLAG00007298	AFLA_134190	194.182	559.388	-1.5264	5.6127e-10	sp|O35488|S27A2_MOUSE Very long-chain acyl-CoA synthetase OS=Mus musculus GN=Slc27a2 PE=1 SV=2//2.03099e-93
CADAFLAG00007311	AFLA_134330	426.721	1053.93	-1.3044	2.1482e-11	-//-
CADAFLAG00007312	AFLA_134340	1439.33	1011.18	0.50936	0.0046478	sp|P40531|GVP36_YEAST Protein GVP36 OS=Saccharomyces cerevisiae (strain ATCC 204508 / S288c) GN=GVP36 PE=1 SV=1//1.91289e-35
CADAFLAG00007319	AFLA_134410	830.514	534.007	0.63715	0.003278	sp|Q74ZK6|NOG1_ASHGO Nucleolar GTP-binding protein 1 OS=Ashbya gossypii (strain ATCC 10895 / CBS 109.51 / FGSC 9923 / NRRL Y-1056) GN=NOG1 PE=3 SV=1//0
CADAFLAG00007320	AFLA_134420	168.627	1032.61	-2.6144	2.9147e-06	sp|Q8TFG1|GHT7_SCHPO Probable high-affinity hexose transporter ght7 OS=Schizosaccharomyces pombe (strain 972 / ATCC 24843) GN=ght7 PE=2 SV=1//2.04732e-118
CADAFLAG00007326	AFLA_134480	416.8	880.987	-1.0798	9.0367e-08	sp|Q9LSV0|GLYR1_ARATH Glyoxylate/succinic semialdehyde reductase 1 OS=Arabidopsis thaliana GN=GLYR1 PE=1 SV=1//4.93335e-18
CADAFLAG00007349	AFLA_134710	554.294	310.007	0.83835	0.0010168	sp|Q12754|RRP12_YEAST Ribosomal RNA-processing protein 12 OS=Saccharomyces cerevisiae (strain ATCC 204508 / S288c) GN=RRP12 PE=1 SV=1//4.0538e-29
CADAFLAG00007351	AFLA_134730	1494.29	1014.21	0.55911	0.0066854	sp|O60184|CYC8_SCHPO General transcriptional corepressor ssn6 OS=Schizosaccharomyces pombe (strain 972 / ATCC 24843) GN=ssn6 PE=1 SV=1//0
CADAFLAG00007353	AFLA_134750	484.758	859.261	-0.82583	0.00010897	-//-
CADAFLAG00007357	AFLA_134790	617.505	982.489	-0.66999	0.00088145	sp|Q9P6P9|PDK_SCHPO [Pyruvate dehydrogenase [lipoamide]] kinase, mitochondrial OS=Schizosaccharomyces pombe (strain 972 / ATCC 24843) GN=SPAC644.11c PE=2 SV=1//4.6469e-96
CADAFLAG00007361	AFLA_134830	643.031	1641.56	-1.3521	8.4924e-16	sp|Q50L41|PA24F_MOUSE Cytosolic phospholipase A2 zeta OS=Mus musculus GN=Pla2g4f PE=2 SV=3//2.58531e-28
CADAFLAG00007362	AFLA_134840	346.576	918.112	-1.4055	3.9472e-12	sp|Q8T9S7|PTEN_DICDI Phosphatidylinositol 3,4,5-trisphosphate 3-phosphatase and dual-specificity protein phosphatase PTEN OS=Dictyostelium discoideum GN=pteN PE=2 SV=1//6.48026e-12
CADAFLAG00007367	AFLA_134890	103.556	253.648	-1.2924	0.0045987	sp|D7UNT2|LCDH_RHISP L-carnitine dehydrogenase OS=Rhizobium sp. GN=lcdH PE=1 SV=1//1.97795e-41
CADAFLAG00007371	AFLA_134930	445.295	1259.75	-1.5003	1.9913e-05	sp|P40035|PIC2_YEAST Mitochondrial phosphate carrier protein 2 OS=Saccharomyces cerevisiae (strain ATCC 204508 / S288c) GN=PIC2 PE=1 SV=1//9.77869e-132
CADAFLAG00007382	AFLA_135040	339.967	529.787	-0.64002	0.018119	sp|P06245|KAPB_YEAST cAMP-dependent protein kinase type 2 OS=Saccharomyces cerevisiae (strain ATCC 204508 / S288c) GN=TPK2 PE=1 SV=2//1.29673e-38
CADAFLAG00007396	AFLA_135180	87.6439	0		6.9136e-10	sp|P77851|HBD_THETC 3-hydroxybutyryl-CoA dehydrogenase OS=Thermoanaerobacterium thermosaccharolyticum (strain ATCC 7956 / DSM 571 / NCIB 9385 / NCA 3814) GN=hbd PE=3 SV=2//5.93739e-17
CADAFLAG00007400	AFLA_135220	52.0261	9.54592	2.4463	0.016622	sp|P51871|CP4F6_RAT Cytochrome P450 4F6 OS=Rattus norvegicus GN=Cyp4f6 PE=2 SV=1//6.68866e-33
CADAFLAG00007402	AFLA_135240	2621.5	4739.21	-0.85425	6.1608e-05	sp|Q00614|CACP_CANTR Carnitine O-acetyltransferase, mitochondrial OS=Candida tropicalis GN=CAT2 PE=3 SV=1//3.62693e-147
CADAFLAG00007406	AFLA_135280	584.592	383.294	0.60898	0.018961	-//-
CADAFLAG00007410	AFLA_135320	105.107	250.98	-1.2557	0.00060949	sp|O59700|YN43_SCHPO Uncharacterized transporter C36.03c OS=Schizosaccharomyces pombe (strain 972 / ATCC 24843) GN=SPBC36.03c PE=2 SV=1//1.57479e-94
CADAFLAG00007431	AFLA_135530	6289.98	4137.26	0.60438	2.5111e-06	sp|Q04336|YM54_YEAST Uncharacterized protein YMR196W OS=Saccharomyces cerevisiae (strain ATCC 204508 / S288c) GN=YMR196W PE=1 SV=1//0
CADAFLAG00007443	AFLA_135650	173.352	83.1269	1.0603	0.020352	-//-
CADAFLAG00007448	AFLA_135700	1824.93	4337.79	-1.2491	1.7372e-19	sp|O60022|AL15_ASPFU Allergen Asp f 15 OS=Neosartorya fumigata (strain ATCC MYA-4609 / Af293 / CBS 101355 / FGSC A1100) GN=AFUA_2G12630 PE=1 SV=1//1.89692e-44
CADAFLAG00007450	AFLA_135720	357.681	683.532	-0.93434	3.4017e-05	-//-
CADAFLAG00007475	AFLA_135970	313.715	613.678	-0.96803	4.2511e-05	-//-
CADAFLAG00007488	AFLA_136100	410.221	223.33	0.87723	0.0029604	sp|Q9HEV5|ASD4_NEUCR GATA type zinc finger protein asd-4 OS=Neurospora crassa (strain ATCC 24698 / 74-OR23-1A / CBS 708.71 / DSM 1257 / FGSC 987) GN=asd-4 PE=1 SV=1//3.45906e-11
CADAFLAG00007503	AFLA_136250	38.3027	5.2785	2.8592	0.033546	-//-
CADAFLAG00007529	AFLA_136510	369.9	634.075	-0.77752	0.00088013	-//-
CADAFLAG00007535	AFLA_136570	1465.61	4043.71	-1.4642	2.0452e-25	sp|P56205|CYC_ASPNG Cytochrome c OS=Aspergillus niger GN=cycA PE=1 SV=1//5.75888e-66
CADAFLAG00007549	AFLA_136710	64.1626	200.664	-1.645	6.7974e-05	sp|Q10082|YAO3_SCHPO Uncharacterized protein C11D3.03c OS=Schizosaccharomyces pombe (strain 972 / ATCC 24843) GN=SPAC11D3.03c PE=2 SV=1//3.98016e-102
CADAFLAG00007550	AFLA_136720	279.961	79.5999	1.8144	7.697e-08	sp|O80739|POT12_ARATH Putative potassium transporter 12 OS=Arabidopsis thaliana GN=POT12 PE=1 SV=2//1.59359e-130
CADAFLAG00007551	AFLA_136730	1960.47	3389.95	-0.79006	4.6577e-08	sp|Q2KJG8|BCKD_BOVIN [3-methyl-2-oxobutanoate dehydrogenase [lipoamide]] kinase, mitochondrial OS=Bos taurus GN=BCKDK PE=2 SV=1//9.33567e-49
CADAFLAG00007555	AFLA_136770	133.614	402.115	-1.5895	3.2e-08	-//-
CADAFLAG00007557	AFLA_136790	314.94	548.655	-0.80082	0.0013292	sp|P20906|MDLC_PSEPU Benzoylformate decarboxylase OS=Pseudomonas putida GN=mdlC PE=1 SV=2//2.56464e-16
CADAFLAG00007600	AFLA_137220	81.4198	13.3197	2.6118	0.0006019	sp|P0ABR7|YEAW_ECOLI Putative dioxygenase subunit alpha YeaW OS=Escherichia coli (strain K12) GN=yeaW PE=3 SV=1//2.87968e-12
CADAFLAG00007621	AFLA_137430	674.387	1337.99	-0.98842	4.7588e-08	sp|Q75A82|ANT1_ASHGO Peroxisomal adenine nucleotide transporter 1 OS=Ashbya gossypii (strain ATCC 10895 / CBS 109.51 / FGSC 9923 / NRRL Y-1056) GN=ANT1 PE=3 SV=1//2.38919e-27
CADAFLAG00007622	AFLA_137440	4299.27	3207.17	0.42279	0.0039976	sp|P23751|H42_EMENI Histone H4.2 OS=Emericella nidulans (strain FGSC A4 / ATCC 38163 / CBS 112.46 / NRRL 194 / M139) GN=hhfB PE=3 SV=2//1.49042e-54
CADAFLAG00007623	AFLA_137450	1508.02	750.235	1.0072	5.1508e-10	sp|Q5U2R5|PPR3C_RAT Protein phosphatase 1 regulatory subunit 3C OS=Rattus norvegicus GN=Ppp1r3c PE=2 SV=1//6.50206e-13
CADAFLAG00007624	AFLA_137460	53.2208	9.29909	2.5168	0.014354	sp|Q9UTR6|OCH1_SCHPO Initiation-specific alpha-1,6-mannosyltransferase OS=Schizosaccharomyces pombe (strain 972 / ATCC 24843) GN=och1 PE=1 SV=2//9.45374e-16
CADAFLAG00007635	AFLA_137570	161.745	375.476	-1.215	5.5103e-05	-//-
CADAFLAG00007648	AFLA_137710	352.449	175.33	1.0073	0.0010645	-//-
CADAFLAG00007653	AFLA_137760	187.251	66.0572	1.5032	0.00041909	sp|P25375|PRTD_YEAST Saccharolysin OS=Saccharomyces cerevisiae (strain ATCC 204508 / S288c) GN=PRD1 PE=1 SV=1//5.03885e-09
CADAFLAG00007654	AFLA_137770	85.1847	16.576	2.3615	0.00089589	-//-
CADAFLAG00007672	AFLA_137950	653.818	304.705	1.1015	1.1048e-06	sp|Q2UFN0|GUAA_ASPOR GMP synthase [glutamine-hydrolyzing] OS=Aspergillus oryzae (strain ATCC 42149 / RIB 40) GN=gua1 PE=3 SV=1//0
CADAFLAG00007674	AFLA_137970	177.018	425.968	-1.2668	6.8166e-06	-//-
CADAFLAG00007680	AFLA_138030	535.058	359.465	0.57384	0.045371	sp|B8NGT5|SCONB_ASPFN Probable E3 ubiquitin ligase complex SCF subunit sconB OS=Aspergillus flavus (strain ATCC 200026 / FGSC A1120 / NRRL 3357 / JCM 12722 / SRRC 167) GN=sconB PE=3 SV=1//0
CADAFLAG00007681	AFLA_138040	78.3053	301.919	-1.947	2.8514e-09	sp|Q2KVG4|DDL_BORA1 D-alanine--D-alanine ligase OS=Bordetella avium (strain 197N) GN=ddl PE=3 SV=1//3.46281e-12
CADAFLAG00007682	AFLA_138050	146.48	432.728	-1.5628	9.7667e-06	sp|O13345|ORDA_ASPPA O-methylsterigmatocystin oxidoreductase OS=Aspergillus parasiticus GN=ordA PE=3 SV=1//2.96688e-23
CADAFLAG00007692	AFLA_138150	21.5648	79.6475	-1.8849	0.0054502	-//-
CADAFLAG00007693	AFLA_138160	34.6775	240.893	-2.7963	9.1266e-14	sp|P15245|PH2M_TRICU Phenol 2-monooxygenase OS=Trichosporon cutaneum PE=1 SV=3//1.49198e-20
CADAFLAG00007705	AFLA_138280	431.623	271.776	0.66735	0.02583	sp|Q9P999|XYLS_SULSO Alpha-xylosidase OS=Sulfolobus solfataricus (strain ATCC 35092 / DSM 1617 / JCM 11322 / P2) GN=xylS PE=1 SV=1//3.88211e-33
CADAFLAG00007728	AFLA_138510	174.297	59.0271	1.5621	0.00045812	sp|Q4UMH6|Y381_RICFE Putative ankyrin repeat protein RF_0381 OS=Rickettsia felis (strain ATCC VR-1525 / URRWXCal2) GN=RF_0381 PE=4 SV=1//7.68454e-07
CADAFLAG00007733	AFLA_138570	8903.21	11118	-0.3205	0.029457	sp|Q8NK92|AORSN_ASPOR Aorsin OS=Aspergillus oryzae (strain ATCC 42149 / RIB 40) GN=aorO PE=1 SV=2//0
CADAFLAG00007735	AFLA_138590	551.731	986.685	-0.83862	2.3069e-05	sp|Q9I4K0|HCHA_PSEAE Molecular chaperone Hsp31 and glyoxalase 3 OS=Pseudomonas aeruginosa (strain ATCC 15692 / PAO1 / 1C / PRS 101 / LMG 12228) GN=hchA PE=3 SV=1//1.21573e-11
CADAFLAG00007740	AFLA_138640	2222.75	932.078	1.2538	3.9647e-18	sp|P19807|HNM1_YEAST Choline transport protein OS=Saccharomyces cerevisiae (strain ATCC 204508 / S288c) GN=HNM1 PE=1 SV=1//6.05984e-08
CADAFLAG00007743	AFLA_138670	32.4691	208.975	-2.6862	3.2219e-11	sp|P43549|YFF4_YEAST Uncharacterized membrane protein YFL054C OS=Saccharomyces cerevisiae (strain ATCC 204508 / S288c) GN=YFL054C PE=1 SV=1//4.08999e-65
CADAFLAG00007751	AFLA_138750	74.0602	194.175	-1.3906	0.00077939	sp|Q01262|HYUA_PSESN Hydantoin utilization protein A OS=Pseudomonas sp. (strain NS671) GN=hyuA PE=3 SV=1//8.56647e-11
CADAFLAG00007755	AFLA_138790	26.8916	79.1063	-1.5566	0.038459	sp|Q00668|STCC_EMENI Putative sterigmatocystin biosynthesis peroxidase stcC OS=Emericella nidulans (strain FGSC A4 / ATCC 38163 / CBS 112.46 / NRRL 194 / M139) GN=stcC PE=3 SV=2//3.40633e-38
CADAFLAG00007761	AFLA_138850	676.705	59.0271	3.5191	7.421e-40	sp|Q8VZ80|PLT5_ARATH Polyol transporter 5 OS=Arabidopsis thaliana GN=PLT5 PE=1 SV=2//1.68143e-53
CADAFLAG00007768	AFLA_138920	225.874	426.956	-0.91857	0.004643	sp|Q47PU3|PAMO_THEFY Phenylacetone monooxygenase OS=Thermobifida fusca (strain YX) GN=pamO PE=1 SV=1//1.26178e-141
CADAFLAG00007776	AFLA_139000	20.5027	71.0889	-1.7938	0.017313	-//-
CADAFLAG00007792	AFLA_139160	1913.03	2618.48	-0.45287	0.0078702	sp|Q00713|STCQ_EMENI Putative sterigmatocystin biosynthesis protein stcQ OS=Emericella nidulans (strain FGSC A4 / ATCC 38163 / CBS 112.46 / NRRL 194 / M139) GN=stcQ PE=4 SV=1//3.12084e-94
CADAFLAG00007803	AFLA_139270	3062.57	4793.63	-0.64637	4.2745e-06	-//-
CADAFLAG00007817	AFLA_139420	2270.72	1602.68	0.50266	0.002274	sp|Q00357|TOXA_COCCA Putative HC-toxin efflux carrier TOXA OS=Cochliobolus carbonum GN=TOXA PE=3 SV=1//5.05389e-15
CADAFLAG00007821	AFLA_139460	263.068	118.325	1.1527	0.0014729	sp|O59700|YN43_SCHPO Uncharacterized transporter C36.03c OS=Schizosaccharomyces pombe (strain 972 / ATCC 24843) GN=SPBC36.03c PE=2 SV=1//4.75002e-22
CADAFLAG00007860	AFLA_064350	54.29	122.568	-1.1748	0.044731	sp|Q9US44|YIZG_SCHPO Uncharacterized transporter C1002.16c OS=Schizosaccharomyces pombe (strain 972 / ATCC 24843) GN=SPAC1002.16c PE=2 SV=1//2.29537e-55
CADAFLAG00007875	AFLA_064500	224.57	401.08	-0.83673	0.015415	-//-
CADAFLAG00007886	AFLA_064610	135.14	35.3973	1.9327	0.00014093	sp|Q9N126|RDH8_BOVIN Retinol dehydrogenase 8 OS=Bos taurus GN=RDH8 PE=1 SV=1//2.58617e-13
CADAFLAG00007897	AFLA_064720	275.047	3.0095	6.514	1.5406e-28	sp|P39932|STL1_YEAST Sugar transporter STL1 OS=Saccharomyces cerevisiae (strain ATCC 204508 / S288c) GN=STL1 PE=1 SV=2//4.05918e-102
CADAFLAG00007899	AFLA_064740	98.5339	15.3181	2.6854	4.7049e-05	sp|O34559|URHG2_BACSU Unsaturated rhamnogalacturonyl hydrolase YteR OS=Bacillus subtilis (strain 168) GN=yteR PE=1 SV=1//1.75558e-12
CADAFLAG00007900	AFLA_064750	2136.57	1134.54	0.91319	6.3775e-10	sp|Q9XFR9|G2OX2_ARATH Gibberellin 2-beta-dioxygenase 2 OS=Arabidopsis thaliana GN=GA2OX2 PE=2 SV=1//4.74341e-08
CADAFLAG00007902	AFLA_064770	54.0823	136.899	-1.3399	0.0092374	sp|Q2UP89|FAEB1_ASPOR Probable feruloyl esterase B-1 OS=Aspergillus oryzae (strain ATCC 42149 / RIB 40) GN=faeB-1 PE=3 SV=1//2.35734e-71
CADAFLAG00007903	AFLA_064780	36.4113	107.744	-1.5652	0.0094112	-//-
CADAFLAG00007905	AFLA_064800	422.972	906.003	-1.099	7.6823e-08	sp|Q92253|RCO3_NEUCR Probable glucose transporter rco-3 OS=Neurospora crassa (strain ATCC 24698 / 74-OR23-1A / CBS 708.71 / DSM 1257 / FGSC 987) GN=rco-3 PE=3 SV=2//1.62018e-59
CADAFLAG00007922	AFLA_064970	559.232	1397.37	-1.3212	0.00030365	sp|O94327|TSPO_SCHPO Translocator protein homolog OS=Schizosaccharomyces pombe (strain 972 / ATCC 24843) GN=SPBC725.10 PE=2 SV=2//5.8427e-26
CADAFLAG00007943	AFLA_065190	111.378	378.016	-1.763	2.271e-09	sp|P87037|XYNB_ASPOR Probable endo-1,4-beta-xylanase B OS=Aspergillus oryzae (strain ATCC 42149 / RIB 40) GN=xlnB PE=1 SV=1//2.11686e-143
CADAFLAG00007978	AFLA_065540	447.057	1079.36	-1.2716	3.0175e-11	sp|O59952|LIP_THELA Lipase OS=Thermomyces lanuginosus GN=LIP PE=1 SV=1//8.32141e-15
CADAFLAG00007979	AFLA_065550	1574.02	732.99	1.1026	1.0039e-11	sp|Q9P3E8|YLZ2_SCHPO Uncharacterized transporter C750.02c/PB2B2.16c OS=Schizosaccharomyces pombe (strain 972 / ATCC 24843) GN=SPAC750.02c PE=2 SV=1//2.13781e-06
CADAFLAG00007980	AFLA_065560	882.338	239.365	1.8821	1.6814e-20	-//-
CADAFLAG00007981	AFLA_065570	1957.28	890.414	1.1363	3.7647e-14	sp|Q12120|OMTA_ASPPA Sterigmatocystin 8-O-methyltransferase OS=Aspergillus parasiticus GN=omtA PE=1 SV=1//3.07042e-29
CADAFLAG00007987	AFLA_065630	1274.53	687.282	0.89099	4.2381e-07	-//-
CADAFLAG00007998	AFLA_065740	140.901	65.5635	1.1037	0.042748	sp|Q7SXF1|DHCR7_DANRE 7-dehydrocholesterol reductase OS=Danio rerio GN=dhcr7 PE=2 SV=1//6.95079e-15
CADAFLAG00008006	AFLA_065820	105.412	229.055	-1.1197	0.004643	-//-
CADAFLAG00008039	AFLA_066150	24.4808	86.1601	-1.8154	0.0057419	sp|Q96VB6|XYNF3_ASPOR Endo-1,4-beta-xylanase F3 OS=Aspergillus oryzae (strain ATCC 42149 / RIB 40) GN=xynF3 PE=1 SV=1//5.14954e-26
CADAFLAG00008044	AFLA_066200	150.456	277.795	-0.88468	0.015896	-//-
CADAFLAG00008049	AFLA_066250	444.619	857.239	-0.94713	7.5034e-06	-//-
CADAFLAG00008052	AFLA_066280	354.43	621.33	-0.80986	0.03794	-//-
CADAFLAG00008054	AFLA_066300	17232	22411.9	-0.37917	0.0036975	sp|O14405|GUN4_HYPJE Endoglucanase-4 OS=Hypocrea jecorina GN=cel61a PE=1 SV=1//2.5415e-78
CADAFLAG00008074	AFLA_066500	465.568	264.499	0.81573	0.0029066	sp|Q7LL04|YQK1_SCHPO UPF0676 protein C1494.01 OS=Schizosaccharomyces pombe (strain 972 / ATCC 24843) GN=SPCC1494.01 PE=3 SV=2//1.55619e-26
CADAFLAG00008122	AFLA_066980	1188.93	715.768	0.7321	0.0015896	sp|Q0C8M3|LNKS_ASPTN Lovastatin nonaketide synthase OS=Aspergillus terreus (strain NIH 2624 / FGSC A1156) GN=lovB PE=3 SV=2//2.2475e-104
CADAFLAG00008125	AFLA_067010	1072.79	1567.53	-0.54713	0.0020317	sp|P80235|CACM_YEAST Putative mitochondrial carnitine O-acetyltransferase OS=Saccharomyces cerevisiae (strain ATCC 204508 / S288c) GN=YAT1 PE=1 SV=2//1.70859e-20
CADAFLAG00008127	AFLA_067030	505.45	339.609	0.5737	0.048673	-//-
CADAFLAG00008130	AFLA_067060	736.088	1032.86	-0.4887	0.026365	sp|P21976|NDUA8_NEUCR NADH-ubiquinone oxidoreductase 20.8 kDa subunit OS=Neurospora crassa (strain ATCC 24698 / 74-OR23-1A / CBS 708.71 / DSM 1257 / FGSC 987) GN=B1O14.280 PE=1 SV=2//1.33299e-11
CADAFLAG00008134	AFLA_067100	741.725	2459.28	-1.7293	1.6509e-28	sp|Q9P3B2|RCF2_SCHPO Respiratory supercomplex factor 2 homolog C1565.01 OS=Schizosaccharomyces pombe (strain 972 / ATCC 24843) GN=rcf2 PE=2 SV=1//2.03587e-17
CADAFLAG00008142	AFLA_067180	101.079	33.152	1.6083	0.010506	sp|Q10723|ARS_VOLCA Arylsulfatase OS=Volvox carteri PE=1 SV=1//2.40703e-09
CADAFLAG00008144	AFLA_067200	369.067	145.211	1.3457	6.534e-06	sp|O35379|MRP1_MOUSE Multidrug resistance-associated protein 1 OS=Mus musculus GN=Abcc1 PE=1 SV=1//4.36653e-07
CADAFLAG00008162	AFLA_067380	1523.91	1137.69	0.42167	0.035655	sp|Q8TGG8|GDA1_ASPFU Probable guanosine-diphosphatase OS=Neosartorya fumigata (strain ATCC MYA-4609 / Af293 / CBS 101355 / FGSC A1100) GN=gda1 PE=3 SV=2//0
CADAFLAG00008168	AFLA_067440	377.224	596.831	-0.6619	0.0096162	sp|P36096|TUL1_YEAST Transmembrane E3 ubiquitin-protein ligase 1 OS=Saccharomyces cerevisiae (strain ATCC 204508 / S288c) GN=TUL1 PE=1 SV=1//3.97625e-52
CADAFLAG00008169	AFLA_067450	525.106	1474.42	-1.4895	2.1273e-17	sp|Q4L4R5|GCSH_STAHJ Glycine cleavage system H protein OS=Staphylococcus haemolyticus (strain JCSC1435) GN=gcvH PE=3 SV=1//7.72924e-32
CADAFLAG00008171	AFLA_067470	114.485	258.998	-1.1778	0.00085043	sp|P58137|ACOT8_MOUSE Acyl-coenzyme A thioesterase 8 OS=Mus musculus GN=Acot8 PE=1 SV=1//1.08347e-09
CADAFLAG00008172	AFLA_067480	230.726	474.391	-1.0399	0.041904	-//-
CADAFLAG00008178	AFLA_067540	741.299	516.961	0.52	0.037009	sp|O59806|YJV8_SCHPO Uncharacterized N-acetyltransferase C550.08 OS=Schizosaccharomyces pombe (strain 972 / ATCC 24843) GN=SPCC550.08 PE=2 SV=1//4.245e-07
CADAFLAG00008181	AFLA_067570	783.157	1168.6	-0.57741	0.0030517	sp|P47029|ALY2_YEAST Arrestin-related trafficking adapter 3 OS=Saccharomyces cerevisiae (strain ATCC 204508 / S288c) GN=ALY2 PE=1 SV=2//7.10864e-45
CADAFLAG00008188	AFLA_067640	281.113	626.528	-1.1562	5.3409e-07	sp|F2Z699|NDH2_YARLI External alternative NADH-ubiquinone oxidoreductase, mitochondrial OS=Yarrowia lipolytica (strain CLIB 122 / E 150) GN=NDH2 PE=1 SV=1//1.85382e-39
CADAFLAG00008203	AFLA_067790	220.067	354.186	-0.68656	0.039672	sp|A3QK15|AACS_DANRE Acetoacetyl-CoA synthetase OS=Danio rerio GN=aacs PE=2 SV=1//0
CADAFLAG00008208	AFLA_067840	1364.41	687.729	0.98836	4.895e-09	sp|P15325|QUTD_EMENI Quinate permease OS=Emericella nidulans (strain FGSC A4 / ATCC 38163 / CBS 112.46 / NRRL 194 / M139) GN=qutD PE=1 SV=2//5.46254e-45
CADAFLAG00008214	AFLA_067900	514.684	331.074	0.63653	0.022572	-//-
CADAFLAG00008230	AFLA_068060	140.227	278.336	-0.98906	0.0040708	-//-
CADAFLAG00008246	AFLA_068220	189.536	356.185	-0.91015	0.0038092	-//-
CADAFLAG00008254	AFLA_068300	1405.15	2132.99	-0.60216	0.00028817	sp|P15703|BGL2_YEAST Glucan 1,3-beta-glucosidase OS=Saccharomyces cerevisiae (strain ATCC 204508 / S288c) GN=BGL2 PE=1 SV=1//2.00347e-69
CADAFLAG00008265	AFLA_068410	290.153	622.706	-1.1017	2.4324e-06	-//-
CADAFLAG00008275	AFLA_068510	125.952	343.136	-1.4459	2.2479e-06	sp|P43071|CDR1_CANAX Multidrug resistance protein CDR1 OS=Candida albicans GN=CDR1 PE=3 SV=1//5.88726e-09
CADAFLAG00008284	AFLA_068600	378.291	93.7314	2.0129	4.5112e-11	sp|Q9C0V1|AMT1_SCHPO Ammonium transporter 1 OS=Schizosaccharomyces pombe (strain 972 / ATCC 24843) GN=amt1 PE=2 SV=1//0
CADAFLAG00008308	AFLA_068840	305.594	769	-1.3314	1.3281e-05	sp|P49364|GCST_PEA Aminomethyltransferase, mitochondrial OS=Pisum sativum GN=GDCST PE=1 SV=2//2.80524e-10
CADAFLAG00008311	AFLA_068870	344.538	195.926	0.81435	0.011941	sp|Q12176|MAK21_YEAST Ribosome biogenesis protein MAK21 OS=Saccharomyces cerevisiae (strain ATCC 204508 / S288c) GN=MAK21 PE=1 SV=1//6.01978e-18
CADAFLAG00008325	AFLA_069010	7703.78	5050.49	0.60914	9.7004e-07	sp|P48466|METK_NEUCR S-adenosylmethionine synthase OS=Neurospora crassa (strain ATCC 24698 / 74-OR23-1A / CBS 708.71 / DSM 1257 / FGSC 987) GN=eth-1 PE=2 SV=1//0
CADAFLAG00008327	AFLA_069030	488.165	280.9	0.79731	0.0082871	-//-
CADAFLAG00008336	AFLA_069120	405.994	233.616	0.79732	0.0078949	sp|O74791|GRN1_SCHPO GTPase grn1 OS=Schizosaccharomyces pombe (strain 972 / ATCC 24843) GN=grn1 PE=1 SV=1//6.11446e-108
CADAFLAG00008361	AFLA_069370	4869.24	8617.77	-0.82362	1.5263e-10	sp|P41756|PGK_ASPOR Phosphoglycerate kinase OS=Aspergillus oryzae (strain ATCC 42149 / RIB 40) GN=pgkA PE=3 SV=1//2.05764e-75
CADAFLAG00008371	AFLA_069470	1275.83	2009.56	-0.65545	6.0924e-05	-//-
CADAFLAG00008381	AFLA_069570	476.374	135.124	1.8178	4.9936e-12	sp|P50276|MUP1_YEAST High-affinity methionine permease OS=Saccharomyces cerevisiae (strain ATCC 204508 / S288c) GN=MUP1 PE=1 SV=1//8.50632e-82
CADAFLAG00008383	AFLA_069590	9237.53	5797.96	0.67196	2.7829e-08	sp|P83783|SAHH_CANAL Adenosylhomocysteinase OS=Candida albicans (strain SC5314 / ATCC MYA-2876) GN=SAH1 PE=1 SV=2//0
CADAFLAG00008392	AFLA_069680	200.22	774.829	-1.9523	3.2843e-16	sp|Q49117|Y182_METEA Uncharacterized oxidoreductase MexAM1_META1p0182 OS=Methylobacterium extorquens (strain ATCC 14718 / DSM 1338 / AM1) GN=MexAM1_META1p0182 PE=3 SV=2//2.93089e-26
CADAFLAG00008393	AFLA_069690	295.292	607.341	-1.0404	1.4739e-05	-//-
CADAFLAG00008397	AFLA_069730	456.133	665.428	-0.54483	0.031207	-//-
CADAFLAG00008409	AFLA_069850	513.761	1201.21	-1.2253	2.6014e-11	sp|P14065|GCY_YEAST Protein GCY OS=Saccharomyces cerevisiae (strain ATCC 204508 / S288c) GN=GCY1 PE=1 SV=1//7.47781e-09
CADAFLAG00008425	AFLA_070010	2823.89	6617.35	-1.2286	1.6328e-05	-//-
CADAFLAG00008426	AFLA_070020	586.129	1400.72	-1.2569	2.8032e-09	sp|B8NIX4|ABFC_ASPFN Probable alpha-N-arabinofuranosidase C OS=Aspergillus flavus (strain ATCC 200026 / FGSC A1120 / NRRL 3357 / JCM 12722 / SRRC 167) GN=abfC PE=3 SV=1//1.18277e-13
CADAFLAG00008427	AFLA_070030	65.9931	152.982	-1.213	0.012084	-//-
CADAFLAG00008430	AFLA_070060	314.095	2127.29	-2.7597	1.7707e-61	-//-
CADAFLAG00008431	AFLA_070070	2511.77	5928.31	-1.2389	1.7076e-07	sp|P10160|IF5A1_RABIT Eukaryotic translation initiation factor 5A-1 OS=Oryctolagus cuniculus GN=EIF5A PE=1 SV=2//8.34405e-09
CADAFLAG00008434	AFLA_070100	1932.09	1096.28	0.81755	1.7413e-07	sp|O60100|IMB4_SCHPO Probable importin subunit beta-4 OS=Schizosaccharomyces pombe (strain 972 / ATCC 24843) GN=kap123 PE=2 SV=1//5.72458e-50
CADAFLAG00008435	AFLA_070110	861.385	1391.86	-0.69228	0.00012508	sp|Q12200|NPC1_YEAST Niemann-Pick type C-related protein 1 OS=Saccharomyces cerevisiae (strain ATCC 204508 / S288c) GN=NCR1 PE=1 SV=1//3.31863e-06
CADAFLAG00008437	AFLA_070130	234.645	676.455	-1.5275	1.9087e-11	sp|P53283|TPO2_YEAST Polyamine transporter 2 OS=Saccharomyces cerevisiae (strain ATCC 204508 / S288c) GN=TPO2 PE=1 SV=1//1.51789e-75
CADAFLAG00008456	AFLA_070320	101.525	21.0903	2.2672	0.00027779	sp|P19807|HNM1_YEAST Choline transport protein OS=Saccharomyces cerevisiae (strain ATCC 204508 / S288c) GN=HNM1 PE=1 SV=1//2.71086e-06
CADAFLAG00008460	AFLA_070360	62.0205	11.8149	2.3921	0.0096162	sp|Q5B288|Y5342_EMENI Uncharacterized protein AN5342 OS=Emericella nidulans (strain FGSC A4 / ATCC 38163 / CBS 112.46 / NRRL 194 / M139) GN=AN5342 PE=1 SV=1//1.97766e-47
CADAFLAG00008466	AFLA_070420	226.078	108.038	1.0653	0.0093371	sp|Q870L2|MIRB_EMENI Siderophore iron transporter mirB OS=Emericella nidulans (strain FGSC A4 / ATCC 38163 / CBS 112.46 / NRRL 194 / M139) GN=mirB PE=3 SV=1//2.25627e-75
CADAFLAG00008471	AFLA_070470	2774.13	7626.79	-1.459	2.7787e-28	-//-
CADAFLAG00008484	AFLA_070600	117.731	351.87	-1.5795	2.6841e-07	-//-
CADAFLAG00008490	AFLA_070660	25.4515	101.725	-1.9988	0.00083793	sp|D7UQ40|SOL5_ALTSO Bifunctional solanapyrone synthase OS=Alternaria solani GN=sol5 PE=1 SV=1//3.84997e-40
CADAFLAG00008500	AFLA_070760	388.092	588.249	-0.60003	0.027354	sp|Q04991|FMP42_YEAST Protein FMP42 OS=Saccharomyces cerevisiae (strain ATCC 204508 / S288c) GN=FMP42 PE=1 SV=1//4.71902e-130
CADAFLAG00008502	AFLA_070780	861.524	1601.49	-0.89446	5.687e-06	sp|Q8TFF9|YP23_SCHPO Putative amidase PB8B6.03 OS=Schizosaccharomyces pombe (strain 972 / ATCC 24843) GN=SPBPB8B6.03 PE=3 SV=1//1.50775e-10
CADAFLAG00008506	AFLA_070820	535.607	880.048	-0.71641	0.018638	sp|Q29448|HMGCL_BOVIN Hydroxymethylglutaryl-CoA lyase, mitochondrial OS=Bos taurus GN=HMGCL PE=2 SV=2//5.44869e-85
CADAFLAG00008509	AFLA_070850	152.097	620.39	-2.0282	4.0625e-17	sp|O14111|PSD3_SCHPO Phosphatidylserine decarboxylase proenzyme 3 OS=Schizosaccharomyces pombe (strain 972 / ATCC 24843) GN=psd3 PE=2 SV=2//1.97111e-24
CADAFLAG00008517	AFLA_070930	1115.57	634.346	0.81444	1.8404e-05	sp|Q9C101|YKT8_SCHPO Uncharacterized MFS-type transporter PB1E7.08c OS=Schizosaccharomyces pombe (strain 972 / ATCC 24843) GN=SPAPB1E7.08c PE=1 SV=1//1.28898e-144
CADAFLAG00008533	AFLA_071090	9169.75	6613.83	0.4714	0.00029635	-//-
CADAFLAG00008542	AFLA_071180	734.169	1602.02	-1.1257	3.5492e-11	-//-
CADAFLAG00008547	AFLA_071230	3173.95	6085.77	-0.93916	5.4607e-13	sp|Q10499|AIF1_SCHPO Apoptosis-inducing factor 1 OS=Schizosaccharomyces pombe (strain 972 / ATCC 24843) GN=aif1 PE=2 SV=3//2.99571e-121
CADAFLAG00008565	AFLA_071410	1544.55	1078.04	0.51877	0.045114	sp|O74522|ADN3_SCHPO Adhesion defective protein 3 OS=Schizosaccharomyces pombe (strain 972 / ATCC 24843) GN=adn3 PE=2 SV=1//2.31409e-08
CADAFLAG00008571	AFLA_071470	1717.71	1276.74	0.42802	0.019445	sp|Q6CA53|APT_YARLI Adenine phosphoribosyltransferase OS=Yarrowia lipolytica (strain CLIB 122 / E 150) GN=APT1 PE=3 SV=1//9.24688e-13
CADAFLAG00008574	AFLA_071500	803.089	1823.48	-1.1831	8.2419e-13	sp|O43003|MMF1_SCHPO Protein mmf1, mitochondrial OS=Schizosaccharomyces pombe (strain 972 / ATCC 24843) GN=mmf1 PE=2 SV=1//1.05708e-35
CADAFLAG00008579	AFLA_071550	31.9497	103.23	-1.692	0.0047532	-//-
CADAFLAG00008580	AFLA_071560	602.125	1310.81	-1.1223	1.0103e-08	sp|A7RK30|QORL2_NEMVE Quinone oxidoreductase-like protein 2 homolog OS=Nematostella vectensis GN=v1g238856 PE=3 SV=1//1.89493e-42
CADAFLAG00008581	AFLA_071570	543.818	1256.62	-1.2083	4.382e-11	sp|P36013|MAOM_YEAST NAD-dependent malic enzyme, mitochondrial OS=Saccharomyces cerevisiae (strain ATCC 204508 / S288c) GN=MAE1 PE=1 SV=1//0
CADAFLAG00008587	AFLA_071630	6863.57	4817.7	0.51061	8.0291e-05	-//-
CADAFLAG00008590	AFLA_071660	1014.3	1549.31	-0.61114	0.00068285	sp|Q86ZV0|XYL2_ASPOR D-xylulose reductase A OS=Aspergillus oryzae (strain ATCC 42149 / RIB 40) GN=xdhA PE=3 SV=2//0
CADAFLAG00008595	AFLA_089090	205.504	447.6	-1.123	4.3207e-05	sp|O74429|VIP1_SCHPO Inositol hexakisphosphate and diphosphoinositol-pentakisphosphate kinase OS=Schizosaccharomyces pombe (strain 972 / ATCC 24843) GN=asp1 PE=1 SV=1//9.83298e-131
CADAFLAG00008609	AFLA_089230	938.727	1407.06	-0.5839	0.0021065	sp|Q6CBE4|ETR1_YARLI Probable trans-2-enoyl-CoA reductase, mitochondrial OS=Yarrowia lipolytica (strain CLIB 122 / E 150) GN=ETR1 PE=3 SV=1//1.69029e-83
CADAFLAG00008612	AFLA_089260	449.484	252.191	0.83375	0.0026706	sp|O60071|YBB9_SCHPO Uncharacterized protein C13G1.09 OS=Schizosaccharomyces pombe (strain 972 / ATCC 24843) GN=SPBC13G1.09 PE=1 SV=1//2.40588e-105
CADAFLAG00008617	AFLA_089310	639.464	1242.53	-0.95835	2.5113e-07	sp|Q54JD9|SCOT_DICDI Probable succinyl-CoA:3-ketoacid coenzyme A transferase, mitochondrial OS=Dictyostelium discoideum GN=oxct1 PE=3 SV=1//5.03438e-161
CADAFLAG00008622	AFLA_089360	165.26	338.152	-1.0329	0.00083793	-//-
CADAFLAG00008627	AFLA_089410	13.4548	92.4259	-2.7802	9.7667e-06	-//-
CADAFLAG00008643	AFLA_089570	354.731	1656.76	-2.2236	4.9427e-37	sp|Q9P6N2|PTF1_SCHPO Pdp3-interacting factor 1 OS=Schizosaccharomyces pombe (strain 972 / ATCC 24843) GN=ptf1 PE=1 SV=1//2.9752e-49
CADAFLAG00008663	AFLA_089770	91.108	1260.91	-3.7907	1.0271e-80	sp|Q2U790|ABFA_ASPOR Probable alpha-N-arabinofuranosidase A OS=Aspergillus oryzae (strain ATCC 42149 / RIB 40) GN=abfA PE=3 SV=2//4.14481e-19
CADAFLAG00008667	AFLA_089810	284.71	102.019	1.4807	2.0598e-05	sp|P33413|DUR3_YEAST Urea active transporter OS=Saccharomyces cerevisiae (strain ATCC 204508 / S288c) GN=DUR3 PE=1 SV=2//6.25995e-08
CADAFLAG00008672	AFLA_089860	364.482	632.452	-0.79511	0.001131	sp|O94091|LIP1_CANAX Lipase 1 OS=Candida albicans GN=LIP1 PE=3 SV=2//5.23168e-37
CADAFLAG00008681	AFLA_089950	118.793	950.771	-3.0006	2.3754e-45	-//-
CADAFLAG00008682	AFLA_089960	109.483	1529.5	-3.8043	5.4909e-91	-//-
CADAFLAG00008686	AFLA_090010	1515.98	668.812	1.1806	1.9608e-13	sp|A5YM72|CRNS1_HUMAN Carnosine synthase 1 OS=Homo sapiens GN=CARNS1 PE=1 SV=3//3.14124e-09
CADAFLAG00008687	AFLA_090020	582.438	103.97	2.4859	1.1857e-22	sp|P32901|PTR2_YEAST Peptide transporter PTR2 OS=Saccharomyces cerevisiae (strain ATCC 204508 / S288c) GN=PTR2 PE=1 SV=2//1.19564e-101
CADAFLAG00008691	AFLA_090060	128.06	508.872	-1.9905	2.185e-14	sp|P24665|PRTA_ASPNG Aspergillopepsin-2 OS=Aspergillus niger PE=1 SV=1//4.16916e-95
CADAFLAG00008693	AFLA_090080	391.642	652.754	-0.737	0.0030621	sp|P11435|CPPM_STRHY Carboxyvinyl-carboxyphosphonate phosphorylmutase OS=Streptomyces hygroscopicus GN=bcpA PE=1 SV=3//2.53805e-52
CADAFLAG00008699	AFLA_090140	173.633	1773.28	-3.3523	8.7341e-79	sp|P40332|YISS_BACSU Uncharacterized oxidoreductase YisS OS=Bacillus subtilis (strain 168) GN=yisS PE=3 SV=2//3.37775e-48
CADAFLAG00008702	AFLA_090170	6.65751	95.1886	-3.8377	1.6751e-09	sp|Q10286|ITR1_SCHPO Myo-inositol transporter 1 OS=Schizosaccharomyces pombe (strain 972 / ATCC 24843) GN=itr1 PE=2 SV=1//4.83974e-114
CADAFLAG00008706	AFLA_090210	467.234	202.933	1.2031	3.2304e-06	sp|O59942|AAP2_NEUCR Amino-acid permease 2 OS=Neurospora crassa (strain ATCC 24698 / 74-OR23-1A / CBS 708.71 / DSM 1257 / FGSC 987) GN=aap-2 PE=2 SV=2//2.02893e-18
CADAFLAG00008709	AFLA_090240	20.2036	172.296	-3.0922	7.328e-12	sp|Q9HFA4|XYNA_ASPOR Endo-1,4-beta-xylanase A OS=Aspergillus oryzae (strain ATCC 42149 / RIB 40) GN=xlnA PE=1 SV=1//2.96984e-55
CADAFLAG00008710	AFLA_090250	134.53	60.285	1.1581	0.035882	-//-
CADAFLAG00008730	AFLA_090450	557.196	1309.55	-1.2328	1.2398e-09	sp|O45228|PROD_CAEEL Proline dehydrogenase 1, mitochondrial OS=Caenorhabditis elegans GN=B0513.5 PE=3 SV=2//2.28656e-29
CADAFLAG00008735	AFLA_090500	689.442	1255.87	-0.86519	2.9588e-06	sp|P23641|MPCP_YEAST Mitochondrial phosphate carrier protein OS=Saccharomyces cerevisiae (strain ATCC 204508 / S288c) GN=MIR1 PE=1 SV=1//3.69891e-106
CADAFLAG00008763	AFLA_090780	102115	84047.4	0.28092	0.04701	sp|Q9Y713|EF1A_ASPOR Elongation factor 1-alpha OS=Aspergillus oryzae (strain ATCC 42149 / RIB 40) GN=tef1 PE=3 SV=1//0
CADAFLAG00008777	AFLA_090920	1119.76	804.596	0.47685	0.025279	-//-
CADAFLAG00008785	AFLA_091000	456.281	245.877	0.89198	0.00082156	sp|O13317|TRI11_FUSSP Isotrichodermin C-15 hydroxylase OS=Fusarium sporotrichioides GN=TRI11 PE=3 SV=1//1.0148e-65
CADAFLAG00008812	AFLA_091270	1628.08	2486.49	-0.61094	0.00011112	sp|P55250|FUMH_RHIOR Fumarate hydratase, mitochondrial OS=Rhizopus oryzae GN=FUMR PE=3 SV=1//3.8017e-07
CADAFLAG00008823	AFLA_091380	694.245	1238.76	-0.83538	8.7712e-06	sp|P36136|SHB17_YEAST Sedoheptulose 1,7-bisphosphatase OS=Saccharomyces cerevisiae (strain ATCC 204508 / S288c) GN=SHB17 PE=1 SV=1//7.97276e-55
CADAFLAG00008834	AFLA_091490	961.248	456.97	1.0728	3.6435e-08	sp|Q9UTA1|YL8J_SCHPO Zinc finger protein C25B8.19c OS=Schizosaccharomyces pombe (strain 972 / ATCC 24843) GN=SPAC25B8.19c PE=2 SV=2//2.62027e-18
CADAFLAG00008835	AFLA_091500	175.845	822.629	-2.2259	1.2412e-24	sp|B8NKI4|BGALB_ASPFN Probable beta-galactosidase B OS=Aspergillus flavus (strain ATCC 200026 / FGSC A1120 / NRRL 3357 / JCM 12722 / SRRC 167) GN=lacB PE=3 SV=2//5.0089e-08
CADAFLAG00008841	AFLA_091560	323.36	647.841	-1.0025	1.2953e-05	sp|Q9HDX2|YKN3_SCHPO Uncharacterized lactate 2-monooxygenase PB1A11.03 OS=Schizosaccharomyces pombe (strain 972 / ATCC 24843) GN=SPAPB1A11.03 PE=2 SV=1//7.79395e-27
CADAFLAG00008851	AFLA_091660	370.283	142.671	1.3759	2.6083e-06	-//-
CADAFLAG00008852	AFLA_091670	161.795	74.8626	1.1119	0.024531	sp|Q08905|FRE3_YEAST Ferric reductase transmembrane component 3 OS=Saccharomyces cerevisiae (strain ATCC 204508 / S288c) GN=FRE3 PE=1 SV=1//2.91375e-31
CADAFLAG00008854	AFLA_091690	1133.93	1690.72	-0.5763	0.0011293	sp|P28299|ACEA_NEUCR Isocitrate lyase OS=Neurospora crassa (strain ATCC 24698 / 74-OR23-1A / CBS 708.71 / DSM 1257 / FGSC 987) GN=acu-3 PE=2 SV=2//8.60969e-09
CADAFLAG00008857	AFLA_091720	1178.41	3394.26	-1.5263	9.2548e-06	-//-
CADAFLAG00008865	AFLA_091800	12.4052	78.6126	-2.6638	0.00011465	-//-
CADAFLAG00008892	AFLA_092070	247.278	474.533	-0.94038	0.00038638	sp|O14188|RNG2_SCHPO Ras GTPase-activating-like protein rng2 OS=Schizosaccharomyces pombe (strain 972 / ATCC 24843) GN=rng2 PE=1 SV=1//8.65158e-07
CADAFLAG00008894	AFLA_092090	53.185	172.273	-1.6956	0.0045495	sp|O07575|YHDF_BACSU Uncharacterized oxidoreductase YhdF OS=Bacillus subtilis (strain 168) GN=yhdF PE=3 SV=1//2.25735e-14
CADAFLAG00008895	AFLA_092100	2120.59	1392.25	0.60705	0.0001844	sp|Q4WHZ9|IMDH_ASPFU Inosine-5&apos;-monophosphate dehydrogenase OS=Neosartorya fumigata (strain ATCC MYA-4609 / Af293 / CBS 101355 / FGSC A1100) GN=AFUA_2G03610 PE=3 SV=1//0
CADAFLAG00008896	AFLA_092110	62.076	164.255	-1.4038	0.0026666	-//-
CADAFLAG00008908	AFLA_092230	192.572	84.1379	1.1946	0.0047436	sp|Q9C101|YKT8_SCHPO Uncharacterized MFS-type transporter PB1E7.08c OS=Schizosaccharomyces pombe (strain 972 / ATCC 24843) GN=SPAPB1E7.08c PE=1 SV=1//1.41109e-128
CADAFLAG00008909	AFLA_092240	1334.64	3474.04	-1.3802	7.6799e-22	sp|O94547|SRK1_SCHPO Serine/threonine-protein kinase srk1 OS=Schizosaccharomyces pombe (strain 972 / ATCC 24843) GN=srk1 PE=1 SV=1//1.79206e-06
CADAFLAG00008943	AFLA_092580	110.649	233.123	-1.0751	0.004752	sp|O14343|KLP5_SCHPO Kinesin-like protein 5 OS=Schizosaccharomyces pombe (strain 972 / ATCC 24843) GN=klp5 PE=1 SV=1//5.75496e-159
CADAFLAG00008944	AFLA_092590	517.424	801.81	-0.63191	0.0050457	sp|Q09859|MSRA_SCHPO Probable peptide methionine sulfoxide reductase OS=Schizosaccharomyces pombe (strain 972 / ATCC 24843) GN=mxr1 PE=2 SV=2//3.77958e-61
CADAFLAG00008955	AFLA_092700	3720.57	2819.28	0.4002	0.011706	sp|P38148|PPS1_YEAST Dual specificity protein phosphatase PPS1 OS=Saccharomyces cerevisiae (strain ATCC 204508 / S288c) GN=PPS1 PE=1 SV=1//6.24416e-44
CADAFLAG00008968	AFLA_092830	1253.68	910.883	0.46083	0.028199	sp|Q09733|GEF2_SCHPO Rho guanine nucleotide exchange factor gef2 OS=Schizosaccharomyces pombe (strain 972 / ATCC 24843) GN=gef2 PE=1 SV=1//3.25779e-11
CADAFLAG00008985	AFLA_093000	139.217	61.5192	1.1782	0.02099	sp|Q08280|BSC6_YEAST Bypass of stop codon protein 6 OS=Saccharomyces cerevisiae (strain ATCC 204508 / S288c) GN=BSC6 PE=1 SV=1//4.64487e-11
CADAFLAG00009020	AFLA_093350	805.014	1081.72	-0.42624	0.048373	sp|Q6LA54|YF48_SCHPO Uncharacterized WD repeat-containing protein C3H5.08c OS=Schizosaccharomyces pombe (strain 972 / ATCC 24843) GN=SPAC3H5.08c PE=1 SV=2//7.30015e-117
CADAFLAG00009031	AFLA_093460	473.325	1028.16	-1.1192	0.010833	-//-
CADAFLAG00009040	AFLA_093550	20.2896	156.039	-2.9431	0.0016297	sp|P53693|RDS1_SCHPO Protein rds1 OS=Schizosaccharomyces pombe (strain 972 / ATCC 24843) GN=rds1 PE=2 SV=2//2.33835e-130
CADAFLAG00009051	AFLA_093660	1630.5	17056.9	-3.387	1.127e-153	-//-
CADAFLAG00009053	AFLA_093680	105.045	202.216	-0.94489	0.02618	sp|D3ZN43|NDUF6_RAT NADH dehydrogenase (ubiquinone) complex I, assembly factor 6 OS=Rattus norvegicus GN=Ndufaf6 PE=3 SV=1//2.35994e-52
CADAFLAG00009064	AFLA_093790	1478.84	886.688	0.73797	1.3903e-05	sp|O13902|DAK1_SCHPO Dihydroxyacetone kinase 1 OS=Schizosaccharomyces pombe (strain 972 / ATCC 24843) GN=dak1 PE=2 SV=1//1.10925e-140
CADAFLAG00009072	AFLA_093870	511.229	909.753	-0.83151	6.5957e-05	sp|O13863|YDU2_SCHPO Uncharacterized kinase C1B1.02c OS=Schizosaccharomyces pombe (strain 972 / ATCC 24843) GN=SPAC1B1.02c PE=1 SV=1//5.8368e-13
CADAFLAG00009081	AFLA_093960	915.95	1504.56	-0.716	5.4433e-05	sp|A2VDC2|HIBCH_XENLA 3-hydroxyisobutyryl-CoA hydrolase, mitochondrial OS=Xenopus laevis GN=hibch PE=2 SV=1//2.19336e-88
CADAFLAG00009103	AFLA_094180	822.322	4645.17	-2.498	4.4083e-20	-//-
CADAFLAG00009104	AFLA_094190	524.598	795.544	-0.60073	0.008114	-//-
CADAFLAG00009126	AFLA_094410	584.125	826.721	-0.50112	0.031362	-//-
CADAFLAG00009130	AFLA_094450	136853	103802	0.39879	0.0013145	sp|Q06902|PEPA_ASPOR Aspartic protease pep1 OS=Aspergillus oryzae (strain ATCC 42149 / RIB 40) GN=pep1 PE=1 SV=2//0
CADAFLAG00009131	AFLA_094460	513.278	276.044	0.89484	0.00045842	sp|Q04052|ARO80_YEAST Transcriptional activator ARO80 OS=Saccharomyces cerevisiae (strain ATCC 204508 / S288c) GN=ARO80 PE=1 SV=1//4.94041e-09
CADAFLAG00009136	AFLA_094510	221.892	122.075	0.86209	0.041026	sp|P39998|EDC3_YEAST Enhancer of mRNA-decapping protein 3 OS=Saccharomyces cerevisiae (strain ATCC 204508 / S288c) GN=EDC3 PE=1 SV=1//4.9511e-22
CADAFLAG00009141	AFLA_094560	1509.99	2224.54	-0.55896	0.0076597	sp|P0C1H8|PPIA2_RHIO9 Peptidyl-prolyl cis-trans isomerase A2 OS=Rhizopus delemar (strain RA 99-880 / ATCC MYA-4621 / FGSC 9543 / NRRL 43880) GN=cyp1 PE=3 SV=1//2.80873e-72
CADAFLAG00009147	AFLA_094620	1494.22	671.2	1.1546	2.1463e-12	-//-
CADAFLAG00009148	AFLA_094630	2131.41	3119.43	-0.54947	0.00034517	sp|Q9HGY8|TPIS_ASPOR Triosephosphate isomerase OS=Aspergillus oryzae (strain ATCC 42149 / RIB 40) GN=tpiA PE=2 SV=1//0
CADAFLAG00009170	AFLA_094850	262.464	514.174	-0.97014	0.00017782	sp|B4SHV9|BETA_STRM5 Choline dehydrogenase OS=Stenotrophomonas maltophilia (strain R551-3) GN=betA PE=3 SV=1//4.04775e-25
CADAFLAG00009180	AFLA_094950	702.991	323.256	1.1208	2.0582e-07	sp|Q9HFE4|FMO1_SCHPO Thiol-specific monooxygenase OS=Schizosaccharomyces pombe (strain 972 / ATCC 24843) GN=fmo1 PE=1 SV=1//1.1473e-30
CADAFLAG00009183	AFLA_094980	9337.77	5947.57	0.65078	5.5488e-08	-//-
CADAFLAG00009184	AFLA_094990	1003.37	490.003	1.034	2.7755e-08	-//-
CADAFLAG00009187	AFLA_095020	643.772	312.969	1.0405	4.2745e-06	-//-
CADAFLAG00009188	AFLA_095030	653.263	450.903	0.53485	0.043977	sp|Q9M0G0|GAGT3_ARATH Gamma-glutamyltranspeptidase 3 OS=Arabidopsis thaliana GN=GGT3 PE=2 SV=1//4.96064e-98
CADAFLAG00009189	AFLA_095040	679.56	331.074	1.0374	3.0431e-06	sp|Q9HMM6|CSD_HALSA Probable cysteine desulfurase OS=Halobacterium salinarum (strain ATCC 700922 / JCM 11081 / NRC-1) GN=csd PE=3 SV=1//7.80691e-28
CADAFLAG00009190	AFLA_095050	987.06	434.574	1.1835	5.1162e-10	sp|Q9HFE4|FMO1_SCHPO Thiol-specific monooxygenase OS=Schizosaccharomyces pombe (strain 972 / ATCC 24843) GN=fmo1 PE=1 SV=1//1.88167e-47
CADAFLAG00009191	AFLA_095060	503.991	322.269	0.64513	0.02057	sp|P55023|TYRO_STRLN Tyrosinase OS=Streptomyces lincolnensis GN=melC2 PE=3 SV=2//4.42916e-21
CADAFLAG00009192	AFLA_095070	959.614	616.075	0.63935	0.0012078	-//-
CADAFLAG00009193	AFLA_095080	280.913	109.026	1.3655	6.6551e-05	-//-
CADAFLAG00009194	AFLA_095090	455.173	260.407	0.80564	0.022495	-//-
CADAFLAG00009195	AFLA_095100	706.034	454.136	0.63661	0.0065558	-//-
CADAFLAG00009244	AFLA_095590	2624.38	3721.89	-0.50406	0.0010045	sp|Q11118|WOS2_SCHPO Protein wos2 OS=Schizosaccharomyces pombe (strain 972 / ATCC 24843) GN=wos2 PE=2 SV=1//3.14873e-24
CADAFLAG00009263	AFLA_095780	319.183	552.581	-0.7918	0.0024064	-//-
CADAFLAG00009264	AFLA_095790	143.335	274.292	-0.93632	0.009315	-//-
CADAFLAG00009297	AFLA_096130	136.52	1124.82	-3.0425	1.4847e-51	-//-
CADAFLAG00009298	AFLA_096140	106.327	240.4	-1.1769	0.0014663	sp|O34559|URHG2_BACSU Unsaturated rhamnogalacturonyl hydrolase YteR OS=Bacillus subtilis (strain 168) GN=yteR PE=1 SV=1//1.33445e-25
CADAFLAG00009305	AFLA_096210	38.3636	124.837	-1.7022	0.0013949	sp|P90682|CATA_ASCSU Catalase OS=Ascaris suum GN=CAT PE=2 SV=2//2.16667e-10
CADAFLAG00009329	AFLA_096450	110.543	303.177	-1.4555	8.2308e-06	-//-
CADAFLAG00009335	AFLA_096510	124.974	279.371	-1.1606	0.0020384	-//-
CADAFLAG00009337	AFLA_096530	23.3774	137.393	-2.5551	4.0103e-07	sp|Q10333|PEX11_SCHPO Peroxisomal biogenesis factor 11 OS=Schizosaccharomyces pombe (strain 972 / ATCC 24843) GN=pex11 PE=2 SV=2//3.01154e-13
CADAFLAG00009351	AFLA_096670	168.525	593.01	-1.8151	1.1478e-13	-//-
CADAFLAG00009353	AFLA_096690	31.7545	312.253	-3.2977	9.9165e-23	sp|A2QBB4|RGXA_ASPNC Putative galacturan 1,4-alpha-galacturonidase A OS=Aspergillus niger (strain CBS 513.88 / FGSC A1513) GN=rgxA PE=2 SV=2//4.96691e-56
CADAFLAG00009371	AFLA_123120	66.457	16.3292	2.025	0.01746	sp|Q9US44|YIZG_SCHPO Uncharacterized transporter C1002.16c OS=Schizosaccharomyces pombe (strain 972 / ATCC 24843) GN=SPAC1002.16c PE=2 SV=1//4.82451e-54
CADAFLAG00009399	AFLA_123400	164.523	350.436	-1.0909	0.00034133	sp|Q87GU5|LUXQ_VIBPA Autoinducer 2 sensor kinase/phosphatase LuxQ OS=Vibrio parahaemolyticus serotype O3:K6 (strain RIMD 2210633) GN=luxQ PE=3 SV=1//1.22117e-19
CADAFLAG00009401	AFLA_123420	86.641	264.77	-1.6116	2.8658e-06	-//-
CADAFLAG00009408	AFLA_123500	190.462	756.843	-1.9905	3.0216e-19	-//-
CADAFLAG00009409	AFLA_123510	18.5988	343.064	-4.2052	9.3659e-21	sp|P0ABR7|YEAW_ECOLI Putative dioxygenase subunit alpha YeaW OS=Escherichia coli (strain K12) GN=yeaW PE=3 SV=1//6.7146e-25
CADAFLAG00009410	AFLA_123520	2.12962	33.4226	-3.9722	0.0039976	sp|P38090|AGP2_YEAST General amino acid permease AGP2 OS=Saccharomyces cerevisiae (strain ATCC 204508 / S288c) GN=AGP2 PE=1 SV=1//2.7089e-130
CADAFLAG00009416	AFLA_123580	175.198	391.9	-1.1615	3.9507e-05	-//-
CADAFLAG00009418	AFLA_123600	1.96484	27.8735	-3.8264	0.0049933	sp|Q54E41|HAOX_DICDI Hydroxyacid oxidase OS=Dictyostelium discoideum GN=haox PE=3 SV=1//3.29304e-77
CADAFLAG00009427	AFLA_123690	680.898	1137.45	-0.7403	0.018591	sp|Q2U1X8|ABNC_ASPOR Probable arabinan endo-1,5-alpha-L-arabinosidase C OS=Aspergillus oryzae (strain ATCC 42149 / RIB 40) GN=abnC PE=3 SV=1//1.47939e-08
CADAFLAG00009431	AFLA_123730	115.327	336.058	-1.543	8.2666e-07	-//-
CADAFLAG00009447	AFLA_123890	46.9429	387.561	-3.0454	2.2474e-23	-//-
CADAFLAG00009455	AFLA_123970	87.8608	9.29909	3.2401	2.0598e-05	sp|O14031|PGT1_SCHPO Glutathione transporter 1 OS=Schizosaccharomyces pombe (strain 972 / ATCC 24843) GN=pgt1 PE=1 SV=1//1.01726e-08
CADAFLAG00009460	AFLA_124020	8.15846	85.8895	-3.3961	3.5053e-07	sp|Q9RC92|UGL_BACGL Unsaturated glucuronyl hydrolase OS=Bacillus sp. (strain GL1) GN=ugl PE=1 SV=1//1.54423e-36
CADAFLAG00009475	AFLA_124170	40.547	2.76267	3.8755	0.0041248	sp|Q09922|YAKB_SCHPO Uncharacterized transcriptional regulatory protein C1F7.11c OS=Schizosaccharomyces pombe (strain 972 / ATCC 24843) GN=SPAC1F7.11c PE=2 SV=1//1.31451e-06
CADAFLAG00009510	AFLA_124520	532.552	344.417	0.62876	0.025603	sp|P41388|TBB_VENIN Tubulin beta chain OS=Venturia inaequalis PE=3 SV=1//4.04645e-20
CADAFLAG00009511	AFLA_124530	49.413	9.54592	2.3719	0.026158	sp|P40445|YIQ6_YEAST Uncharacterized transporter YIL166C OS=Saccharomyces cerevisiae (strain ATCC 204508 / S288c) GN=YIL166C PE=1 SV=1//4.42261e-133
CADAFLAG00009524	AFLA_124660	617.251	2798.69	-2.1808	1.411e-45	sp|Q2UCT7|PELC_ASPOR Probable pectin lyase C OS=Aspergillus oryzae (strain ATCC 42149 / RIB 40) GN=pelC PE=3 SV=1//2.73688e-62
CADAFLAG00009532	AFLA_124740	38.9188	4.02059	3.275	0.014516	sp|P05804|BGLR_ECOLI Beta-glucuronidase OS=Escherichia coli (strain K12) GN=uidA PE=1 SV=2//0
CADAFLAG00009542	AFLA_124840	64.4725	154.757	-1.2632	0.0064597	-//-
CADAFLAG00009548	AFLA_124900	122.155	938.885	-2.9422	4.6401e-43	sp|O34612|YJLB_BACSU Uncharacterized protein YjlB OS=Bacillus subtilis (strain 168) GN=yjlB PE=4 SV=1//3.39475e-08
CADAFLAG00009555	AFLA_124970	43.0062	126.613	-1.5578	0.0026302	sp|Q54F46|WARA_DICDI Homeobox protein Wariai OS=Dictyostelium discoideum GN=warA PE=2 SV=1//4.44915e-08
CADAFLAG00009558	AFLA_125000	475.715	1693.82	-1.8321	3.6609e-27	sp|O59700|YN43_SCHPO Uncharacterized transporter C36.03c OS=Schizosaccharomyces pombe (strain 972 / ATCC 24843) GN=SPBC36.03c PE=2 SV=1//6.96137e-135
CADAFLAG00009567	AFLA_125090	376.167	1315.66	-1.8063	8.1007e-09	sp|P86029|HQD2_CANAL Catechol 1,2-dioxygenase OS=Candida albicans (strain SC5314 / ATCC MYA-2876) GN=HQD2 PE=1 SV=1//1.25975e-16
CADAFLAG00009585	AFLA_125270	7.5907	41.44	-2.4487	0.02094	sp|Q00234|TYRO_ASPOR Tyrosinase OS=Aspergillus oryzae (strain ATCC 42149 / RIB 40) GN=melO PE=1 SV=1//8.59928e-20
CADAFLAG00009598	AFLA_125400	432.576	284.825	0.60288	0.04922	sp|P40896|YJV3_YEAST Uncharacterized protein YJL213W OS=Saccharomyces cerevisiae (strain ATCC 204508 / S288c) GN=YJL213W PE=2 SV=1//1.37215e-07
CADAFLAG00009605	AFLA_125470	20.0872	117.067	-2.543	2.0754e-06	-//-
CADAFLAG00009624	AFLA_125660	943.448	17.8339	5.7252	2.9422e-81	sp|P17326|AT1A_ARTSF Sodium/potassium-transporting ATPase subunit alpha-A OS=Artemia franciscana PE=2 SV=1//1.21237e-148
CADAFLAG00009635	AFLA_125770	283.393	514.15	-0.85938	0.0012037	-//-
CADAFLAG00009644	AFLA_125860	2366.44	3960.76	-0.74306	1.8793e-07	sp|P08843|ADH1_EMENI Alcohol dehydrogenase 1 OS=Emericella nidulans (strain FGSC A4 / ATCC 38163 / CBS 112.46 / NRRL 194 / M139) GN=alcA PE=3 SV=2//3.24165e-72
CADAFLAG00009648	AFLA_125900	585.33	1865.64	-1.6723	1.228e-16	sp|B8NWE1|NPIIB_ASPFN Neutral protease 2 homolog AFLA_119780 OS=Aspergillus flavus (strain ATCC 200026 / FGSC A1120 / NRRL 3357 / JCM 12722 / SRRC 167) GN=AFLA_119780 PE=3 SV=1//1.58721e-19
CADAFLAG00009662	AFLA_126040	11.6547	53.5018	-2.1987	0.013781	sp|P53047|RTA1_YEAST Protein RTA1 OS=Saccharomyces cerevisiae (strain ATCC 204508 / S288c) GN=RTA1 PE=1 SV=1//2.14793e-11
CADAFLAG00009681	AFLA_126230	147.649	776.874	-2.3955	1.5912e-26	sp|P0CL70|RNCL_ASPCV Ribonuclease clavin OS=Aspergillus clavatus GN=cla PE=2 SV=1//2.07628e-07
CADAFLAG00009684	AFLA_126260	2785.61	1675.31	0.73357	1.7852e-07	sp|Q07WU7|FRDA_SHEFN Fumarate reductase flavoprotein subunit OS=Shewanella frigidimarina (strain NCIMB 400) GN=fccA PE=1 SV=2//2.77133e-20
CADAFLAG00009697	AFLA_126390	1816.31	6600.24	-1.8615	1.7657e-38	sp|Q01284|2NPD_NEUCR Nitronate monooxygenase OS=Neurospora crassa (strain ATCC 24698 / 74-OR23-1A / CBS 708.71 / DSM 1257 / FGSC 987) GN=ncd-2 PE=1 SV=1//1.52879e-11
CADAFLAG00009699	AFLA_126410	58.5117	170.521	-1.5432	0.00091153	-//-
CADAFLAG00009712	AFLA_126540	19.7093	80.6348	-2.0325	0.0027873	-//-
CADAFLAG00009714	AFLA_126560	46.2713	122.568	-1.4054	0.011411	-//-
CADAFLAG00009716	AFLA_126580	225.895	70.5952	1.678	1.586e-05	sp|P23342|MSOX_BACSN Monomeric sarcosine oxidase OS=Bacillus sp. (strain NS-129) GN=soxA PE=1 SV=1//2.23016e-51
CADAFLAG00009720	AFLA_126620	1247.65	773.594	0.68957	0.00011426	sp|Q12612|TRI4_FUSSP Trichodiene oxygenase OS=Fusarium sporotrichioides GN=TRI4 PE=3 SV=1//2.52656e-10
CADAFLAG00009736	AFLA_126780	88.0953	8.04117	3.4536	7.5392e-06	sp|Q2U325|BGLG_ASPOR Probable beta-glucosidase G OS=Aspergillus oryzae (strain ATCC 42149 / RIB 40) GN=bglG PE=3 SV=1//5.34747e-25
CADAFLAG00009745	AFLA_126870	4.08194	174.542	-5.4182	1.9145e-22	-//-
CADAFLAG00009747	AFLA_126890	140.309	48.7407	1.5254	0.0033937	sp|P15685|MAL61_YEASX Maltose permease MAL61 OS=Saccharomyces cerevisiae GN=MAL61 PE=2 SV=1//1.08537e-151
CADAFLAG00009748	AFLA_126900	1104.19	382.8	1.5283	5.8858e-17	sp|Q02751|MALT_CANAX Alpha-glucosidase OS=Candida albicans GN=MAL2 PE=1 SV=4//0
CADAFLAG00009755	AFLA_126970	127.286	48.7169	1.3856	0.0099793	sp|P38090|AGP2_YEAST General amino acid permease AGP2 OS=Saccharomyces cerevisiae (strain ATCC 204508 / S288c) GN=AGP2 PE=1 SV=1//2.71059e-115
CADAFLAG00009779	AFLA_127210	23050.5	12426.3	0.8914	2.0236e-16	-//-
CADAFLAG00009789	AFLA_127310	255.977	471.771	-0.88207	0.00093435	sp|Q9HAC7|CG010_HUMAN CaiB/baiF CoA-transferase family protein C7orf10 OS=Homo sapiens GN=C7orf10 PE=1 SV=2//3.39941e-06
CADAFLAG00009790	AFLA_127320	655.513	943.598	-0.52555	0.02639	sp|Q9Y7P0|RISA_SCHPO Riboflavin synthase OS=Schizosaccharomyces pombe (strain 972 / ATCC 24843) GN=rib5 PE=1 SV=1//2.9759e-68
CADAFLAG00009792	AFLA_127340	220.105	109.519	1.007	0.013467	sp|Q2UNB7|RRP3_ASPOR ATP-dependent rRNA helicase rrp3 OS=Aspergillus oryzae (strain ATCC 42149 / RIB 40) GN=rrp3 PE=3 SV=1//0
CADAFLAG00009795	AFLA_127370	827.657	588.543	0.49189	0.041238	sp|Q9URX7|ANM1_SCHPO Probable protein arginine N-methyltransferase OS=Schizosaccharomyces pombe (strain 972 / ATCC 24843) GN=SPAC890.07c PE=1 SV=2//2.89053e-16
CADAFLAG00009810	AFLA_127520	4753.31	8502.9	-0.83902	4.2629e-11	sp|P04841|ALOX_PICAN Alcohol oxidase OS=Pichia angusta GN=MOX PE=3 SV=1//2.07173e-18
CADAFLAG00009817	AFLA_127590	293.297	638.247	-1.1218	1.5547e-06	sp|Q10248|YD1K_SCHPO Uncharacterized mitochondrial carrier C4G9.20c OS=Schizosaccharomyces pombe (strain 972 / ATCC 24843) GN=SPAC4G9.20c PE=2 SV=2//1.03576e-76
CADAFLAG00009819	AFLA_127610	6824.86	8697.64	-0.34983	0.017299	-//-
CADAFLAG00009825	AFLA_127670	685.987	1127.56	-0.71695	0.00022937	sp|Q7T3C7|RT4I1_DANRE Reticulon-4-interacting protein 1 homolog, mitochondrial OS=Danio rerio GN=rtn4ip1 PE=2 SV=2//5.62208e-13
CADAFLAG00009841	AFLA_127830	618.285	1005.24	-0.70119	0.00056579	sp|P10127|ADH4_YEAST Alcohol dehydrogenase 4 OS=Saccharomyces cerevisiae (strain ATCC 204508 / S288c) GN=ADH4 PE=1 SV=3//7.83462e-14
CADAFLAG00009842	AFLA_127840	456.233	877.413	-0.94349	4.6816e-06	sp|Q9P7D4|ACON2_SCHPO Probable aconitate hydratase 2 OS=Schizosaccharomyces pombe (strain 972 / ATCC 24843) GN=SPBP4H10.15 PE=2 SV=3//0
CADAFLAG00009851	AFLA_127930	462.864	1343.07	-1.5369	1.451e-17	sp|B8NNI2|GANA_ASPFN Probable arabinogalactan endo-1,4-beta-galactosidase A OS=Aspergillus flavus (strain ATCC 200026 / FGSC A1120 / NRRL 3357 / JCM 12722 / SRRC 167) GN=galA PE=3 SV=1//2.67088e-56
CADAFLAG00009865	AFLA_128070	1748.22	3596.27	-1.0406	3.3545e-13	-//-
CADAFLAG00009866	AFLA_128080	1525.81	3174.3	-1.0569	4.7375e-13	-//-
CADAFLAG00009867	AFLA_128090	357.774	217.51	0.71797	0.026749	sp|P10615|CP52A_CANTR Cytochrome P450 52A1 OS=Candida tropicalis GN=CYP52A1 PE=1 SV=3//3.20825e-103
CADAFLAG00009868	AFLA_128100	122.382	29.1314	2.0707	0.00018353	sp|Q6AGR0|GLPK_LEIXX Glycerol kinase OS=Leifsonia xyli subsp. xyli (strain CTCB07) GN=glpK PE=3 SV=1//3.10204e-12
CADAFLAG00009870	AFLA_128120	220.458	504.358	-1.1939	3.9773e-06	sp|Q8J0P4|CRF1_ASPFU Probable glycosidase crf1 OS=Neosartorya fumigata (strain ATCC MYA-4609 / Af293 / CBS 101355 / FGSC A1100) GN=crf1 PE=1 SV=2//2.26865e-09
CADAFLAG00009884	AFLA_128260	457.399	703.294	-0.62067	0.01157	sp|Q2UN31|PMIP_ASPOR Mitochondrial intermediate peptidase OS=Aspergillus oryzae (strain ATCC 42149 / RIB 40) GN=oct1 PE=3 SV=1//0
CADAFLAG00009885	AFLA_128270	155.203	362.451	-1.2236	4.6503e-05	-//-
CADAFLAG00009906	AFLA_128480	254.947	903.041	-1.8246	9.7813e-19	sp|B8NP65|BGLF_ASPFN Probable beta-glucosidase F OS=Aspergillus flavus (strain ATCC 200026 / FGSC A1120 / NRRL 3357 / JCM 12722 / SRRC 167) GN=bglF PE=3 SV=1//4.6545e-44
CADAFLAG00009909	AFLA_128510	499.947	1902.48	-1.928	4.3994e-31	sp|C8VP36|6PGD_EMENI 6-phosphogluconate dehydrogenase, decarboxylating OS=Emericella nidulans (strain FGSC A4 / ATCC 38163 / CBS 112.46 / NRRL 194 / M139) GN=AN10233 PE=3 SV=1//0
CADAFLAG00009910	AFLA_128520	277.791	1050.67	-1.9192	3.1344e-22	sp|P07046|3SHD_NEUCR 3-dehydroshikimate dehydratase OS=Neurospora crassa (strain ATCC 24698 / 74-OR23-1A / CBS 708.71 / DSM 1257 / FGSC 987) GN=qa-4 PE=4 SV=1//2.03565e-47
CADAFLAG00009911	AFLA_128530	951.564	1764.35	-0.89076	6.9779e-08	sp|Q9P8I0|PUT2_EMENI Delta-1-pyrroline-5-carboxylate dehydrogenase, mitochondrial OS=Emericella nidulans (strain FGSC A4 / ATCC 38163 / CBS 112.46 / NRRL 194 / M139) GN=prnC PE=3 SV=2//5.81958e-08
CADAFLAG00009912	AFLA_128540	215.185	601.521	-1.483	2.0172e-09	sp|Q86H28|PROD_DICDI Proline dehydrogenase 1, mitochondrial OS=Dictyostelium discoideum GN=prodh PE=3 SV=1//4.02685e-30
CADAFLAG00009919	AFLA_128610	285.681	634.816	-1.1519	4.6526e-07	sp|B8NP78|MANBA_ASPFN Probable beta-mannosidase A OS=Aspergillus flavus (strain ATCC 200026 / FGSC A1120 / NRRL 3357 / JCM 12722 / SRRC 167) GN=mndA PE=3 SV=1//0
CADAFLAG00009927	AFLA_128690	276.815	95.2124	1.5397	8.7712e-06	-//-
CADAFLAG00009935	AFLA_128770	410.508	1077.71	-1.3925	4.4369e-08	-//-
CADAFLAG00009943	AFLA_128850	876.42	3981.86	-2.1837	7.4372e-17	sp|P38875|GPI16_YEAST GPI transamidase component GPI16 OS=Saccharomyces cerevisiae (strain ATCC 204508 / S288c) GN=GPI16 PE=1 SV=2//1.6616e-45
CADAFLAG00009945	AFLA_128870	48.8398	148.714	-1.6064	0.00067646	sp|Q2UMX6|FAEB2_ASPOR Probable feruloyl esterase B-2 OS=Aspergillus oryzae (strain ATCC 42149 / RIB 40) GN=faeB-2 PE=3 SV=1//9.82145e-67
CADAFLAG00009949	AFLA_128910	919.657	1527.65	-0.73215	3.5663e-05	sp|P87308|LSB5_SCHPO Protein lsb5 OS=Schizosaccharomyces pombe (strain 972 / ATCC 24843) GN=lsb5 PE=2 SV=1//1.08167e-44
CADAFLAG00009959	AFLA_129010	92.0483	207.988	-1.176	0.0036207	sp|Q9Y7B6|PANB_EMENI 3-methyl-2-oxobutanoate hydroxymethyltransferase OS=Emericella nidulans (strain FGSC A4 / ATCC 38163 / CBS 112.46 / NRRL 194 / M139) GN=panB PE=3 SV=1//3.52839e-51
CADAFLAG00009967	AFLA_129090	316.894	155.744	1.0248	0.0017592	sp|Q9JJX8|ST32B_MOUSE Serine/threonine-protein kinase 32B OS=Mus musculus GN=Stk32b PE=2 SV=2//2.47597e-71
CADAFLAG00009980	AFLA_129220	997.149	640.047	0.63963	0.0016846	-//-
CADAFLAG00009983	AFLA_129250	1123.24	687.259	0.70874	0.00017724	sp|Q47944|SDH_GLUOY L-sorbose 1-dehydrogenase OS=Gluconobacter oxydans PE=3 SV=1//8.3171e-60
CADAFLAG00009985	AFLA_129270	464.719	305.199	0.60661	0.044756	-//-
CADAFLAG00010019	AFLA_129610	766.23	1527.43	-0.99526	7.9634e-09	sp|Q1JPL4|NDB1_ARATH NAD(P)H dehydrogenase B1, mitochondrial OS=Arabidopsis thaliana GN=NDB1 PE=1 SV=1//7.19099e-17
CADAFLAG00010037	AFLA_129790	2479.92	1790.49	0.46994	0.0036668	-//-
CADAFLAG00010039	AFLA_129810	1201.85	797.566	0.59158	0.0023573	sp|P38707|SYNC_YEAST Asparagine--tRNA ligase, cytoplasmic OS=Saccharomyces cerevisiae (strain ATCC 204508 / S288c) GN=DED81 PE=1 SV=1//2.45895e-14
CADAFLAG00010042	AFLA_129840	846.156	239.365	1.8217	7.4194e-19	-//-
CADAFLAG00010044	AFLA_129860	2107.34	7437.07	-1.8193	6.3899e-14	sp|Q5AW46|Y7484_EMENI Uncharacterized protein AN7484 OS=Emericella nidulans (strain FGSC A4 / ATCC 38163 / CBS 112.46 / NRRL 194 / M139) GN=AN7484 PE=1 SV=1//1.66805e-97
CADAFLAG00010062	AFLA_130040	1141.87	850.009	0.42584	0.049901	sp|P53390|MEP3_YEAST Ammonium transporter MEP3 OS=Saccharomyces cerevisiae (strain ATCC 204508 / S288c) GN=MEP3 PE=1 SV=1//2.98793e-152
CADAFLAG00010065	AFLA_130070	1735.41	3006.57	-0.79284	0.0017624	sp|P80581|HXK_EMENI Hexokinase OS=Emericella nidulans (strain FGSC A4 / ATCC 38163 / CBS 112.46 / NRRL 194 / M139) GN=hxkA PE=1 SV=2//0
CADAFLAG00010071	AFLA_130130	207.651	389.878	-0.90886	0.0019191	sp|Q06466|TDA6_YEAST Putative vacuolar protein sorting-associated protein TDA6 OS=Saccharomyces cerevisiae (strain ATCC 204508 / S288c) GN=TDA6 PE=2 SV=1//1.89713e-12
CADAFLAG00010073	AFLA_130150	2426.19	1766.24	0.45801	0.0064202	sp|P00365|DHE2_NEUCR NAD-specific glutamate dehydrogenase OS=Neurospora crassa (strain ATCC 24698 / 74-OR23-1A / CBS 708.71 / DSM 1257 / FGSC 987) GN=gdh-1 PE=1 SV=4//0
CADAFLAG00010082	AFLA_130240	1005.62	529.834	0.92447	1.9761e-06	sp|P39719|FLC2_YEAST Flavin carrier protein 2 OS=Saccharomyces cerevisiae (strain ATCC 204508 / S288c) GN=FLC2 PE=1 SV=2//7.8595e-32
CADAFLAG00010094	AFLA_130360	584.11	891.967	-0.61075	0.0051512	sp|Q8S5M8|YIPL_ORYSJ Putative yippee-like protein Os10g0369500 OS=Oryza sativa subsp. japonica GN=Os10g0369500 PE=3 SV=1//8.23266e-19
CADAFLAG00010121	AFLA_000540	21.7046	87.3943	-2.0095	0.002541	sp|P08158|AMDS_EMENI Acetamidase OS=Emericella nidulans (strain FGSC A4 / ATCC 38163 / CBS 112.46 / NRRL 194 / M139) GN=amdS PE=2 SV=1//1.13589e-11
CADAFLAG00010141	AFLA_000750	140.576	325.596	-1.2117	0.00092761	sp|P82604|OXD_BACSX Phenylacetaldoxime dehydratase OS=Bacillus sp. (strain OxB-1) GN=oxd PE=1 SV=2//1.80074e-39
CADAFLAG00010147	AFLA_000810	216.865	432.505	-0.99592	0.00048214	sp|B8NPL7|BGLH_ASPFN Probable beta-glucosidase H OS=Aspergillus flavus (strain ATCC 200026 / FGSC A1120 / NRRL 3357 / JCM 12722 / SRRC 167) GN=bglH PE=3 SV=1//0
CADAFLAG00010171	AFLA_001050	159.311	75.6031	1.0753	0.02899	sp|P39709|SEO1_YEAST Probable transporter SEO1 OS=Saccharomyces cerevisiae (strain ATCC 204508 / S288c) GN=SEO1 PE=1 SV=1//1.21211e-79
CADAFLAG00010208	AFLA_001420	974.177	340.572	1.5162	1.6095e-15	sp|B8NPS8|XGHA_ASPFN Probable endo-xylogalacturonan hydrolase A OS=Aspergillus flavus (strain ATCC 200026 / FGSC A1120 / NRRL 3357 / JCM 12722 / SRRC 167) GN=xghA PE=3 SV=1//0
CADAFLAG00010212	AFLA_001460	121.363	288.87	-1.2511	0.00020058	sp|P27526|PHR_NEUCR Deoxyribodipyrimidine photo-lyase OS=Neurospora crassa (strain ATCC 24698 / 74-OR23-1A / CBS 708.71 / DSM 1257 / FGSC 987) GN=phr-1 PE=3 SV=1//1.08513e-12
CADAFLAG00010235	AFLA_001690	676.186	449.693	0.58848	0.022789	-//-
CADAFLAG00010237	AFLA_001710	2028.85	1265.89	0.68051	9.4593e-06	sp|Q09923|YAKC_SCHPO Aldo-keto reductase yakc [NADP(+)] OS=Schizosaccharomyces pombe (strain 972 / ATCC 24843) GN=yakc PE=1 SV=1//3.67594e-104
CADAFLAG00010239	AFLA_001730	425.562	837.701	-0.97706	3.2738e-06	sp|P76536|YFEX_ECOLI Probable deferrochelatase/peroxidase YfeX OS=Escherichia coli (strain K12) GN=yfeX PE=1 SV=2//7.56668e-45
CADAFLAG00010240	AFLA_001740	376.425	231.841	0.69923	0.029123	sp|P53388|DIP5_YEAST Dicarboxylic amino acid permease OS=Saccharomyces cerevisiae (strain ATCC 204508 / S288c) GN=DIP5 PE=1 SV=1//9.66919e-105
CADAFLAG00010241	AFLA_001750	3.30101	69.3373	-4.3927	5.8672e-09	-//-
CADAFLAG00010245	AFLA_001790	98.5715	195.433	-0.98743	0.022321	sp|O59814|YCT4_SCHPO Uncharacterized transporter C794.04c OS=Schizosaccharomyces pombe (strain 972 / ATCC 24843) GN=SPCC794.04c PE=2 SV=1//1.07809e-84
CADAFLAG00010246	AFLA_001800	688.808	420.267	0.71279	0.0024955	-//-
CADAFLAG00010248	AFLA_001820	95.1541	418.126	-2.1356	0.00053124	-//-
CADAFLAG00010249	AFLA_001830	41.3584	159.542	-1.9477	0.00072461	-//-
CADAFLAG00010255	AFLA_001890	382.595	1319.04	-1.7856	1.0697e-22	sp|Q01738|CDH_PHACH Cellobiose dehydrogenase OS=Phanerochaete chrysosporium GN=CDH-1 PE=1 SV=1//7.746e-13
CADAFLAG00010260	AFLA_001940	31.5897	98.2219	-1.6366	0.0072187	sp|P38680|MTR_NEUCR N amino acid transport system protein OS=Neurospora crassa (strain ATCC 24698 / 74-OR23-1A / CBS 708.71 / DSM 1257 / FGSC 987) GN=mtr PE=3 SV=2//5.34276e-20
CADAFLAG00010261	AFLA_001950	337.207	676.654	-1.0048	1.359e-05	sp|P50198|LINX_PSEPA 2,5-dichloro-2,5-cyclohexadiene-1,4-diol dehydrogenase OS=Pseudomonas paucimobilis GN=linX PE=3 SV=1//8.55522e-46
CADAFLAG00010272	AFLA_002060	1212.32	1921.23	-0.66426	7.8528e-05	sp|P14940|ADH_CUPNE Alcohol dehydrogenase OS=Cupriavidus necator GN=adh PE=3 SV=1//2.33159e-53
CADAFLAG00010275	AFLA_002090	1222.68	1612.85	-0.39956	0.04701	sp|P34528|YM67_CAEEL Putative serine protease K12H4.7 OS=Caenorhabditis elegans GN=K12H4.7 PE=2 SV=2//1.38904e-27
CADAFLAG00010287	AFLA_002210	176.475	68.3262	1.369	0.0022637	-//-
CADAFLAG00010316	AFLA_002500	965.511	2981.77	-1.6268	9.7779e-28	sp|P33303|SFC1_YEAST Succinate/fumarate mitochondrial transporter OS=Saccharomyces cerevisiae (strain ATCC 204508 / S288c) GN=SFC1 PE=1 SV=2//1.31613e-126
CADAFLAG00010332	AFLA_002660	7.6516	41.1932	-2.4286	0.020685	-//-
CADAFLAG00010348	AFLA_002820	54.3509	444.001	-3.0302	2.7024e-07	sp|P39966|PP2C2_YEAST Protein phosphatase 2C homolog 2 OS=Saccharomyces cerevisiae (strain ATCC 204508 / S288c) GN=PTC2 PE=1 SV=1//1.3224e-21
CADAFLAG00010349	AFLA_002830	110.64	483.491	-2.1276	2.3244e-15	sp|P40387|TPS1_SCHPO Alpha,alpha-trehalose-phosphate synthase [UDP-forming] OS=Schizosaccharomyces pombe (strain 972 / ATCC 24843) GN=tps1 PE=1 SV=2//6.20602e-12
CADAFLAG00010350	AFLA_002840	37.9427	266.498	-2.8122	5.9713e-15	sp|Q9URY9|YI06_SCHPO Uncharacterized hemerythrin-like protein C869.06c OS=Schizosaccharomyces pombe (strain 972 / ATCC 24843) GN=SPAC869.06c PE=2 SV=1//1.15199e-60
CADAFLAG00010351	AFLA_002850	153.841	1158.96	-2.9133	8.1172e-49	sp|Q7FAX1|PXG_ORYSJ Peroxygenase OS=Oryza sativa subsp. japonica GN=PXG PE=2 SV=1//2.59798e-06
CADAFLAG00010352	AFLA_002860	319.214	760.028	-1.2515	1.2412e-08	sp|Q6DF30|DHDH_XENTR Trans-1,2-dihydrobenzene-1,2-diol dehydrogenase OS=Xenopus tropicalis GN=dhdh PE=2 SV=1//1.62593e-21
CADAFLAG00010364	AFLA_002980	130.138	400.611	-1.6222	1.9948e-08	sp|Q64380|SARDH_RAT Sarcosine dehydrogenase, mitochondrial OS=Rattus norvegicus GN=Sardh PE=1 SV=2//2.47924e-21
CADAFLAG00010377	AFLA_003110	532.537	1279.31	-1.2644	0.0014978	sp|B8NQ08|CYNS_ASPFN Cyanate hydratase OS=Aspergillus flavus (strain ATCC 200026 / FGSC A1120 / NRRL 3357 / JCM 12722 / SRRC 167) GN=cyn1 PE=3 SV=1//1.18317e-88
CADAFLAG00010406	AFLA_003400	98.9511	392.617	-1.9883	8.922e-12	-//-
CADAFLAG00010432	AFLA_003660	186.6	67.8088	1.4604	0.0005548	-//-
CADAFLAG00010436	AFLA_003700	394.22	699.249	-0.82681	0.00041909	sp|P09437|CYB2_HANAN Cytochrome b2, mitochondrial OS=Hansenula anomala GN=CYB2 PE=1 SV=2//4.23227e-25
CADAFLAG00010438	AFLA_003720	305.583	826.745	-1.4359	4.2163e-11	sp|P39932|STL1_YEAST Sugar transporter STL1 OS=Saccharomyces cerevisiae (strain ATCC 204508 / S288c) GN=STL1 PE=1 SV=2//2.66348e-109
CADAFLAG00010440	AFLA_003740	1163.82	680.475	0.77425	2.5531e-05	-//-
CADAFLAG00010447	AFLA_003810	440.907	986.662	-1.1621	3.3478e-09	sp|P64744|Y912_MYCBO Uncharacterized protein Mb0912 OS=Mycobacterium bovis (strain ATCC BAA-935 / AF2122/97) GN=Mb0912 PE=4 SV=1//1.0203e-08
CADAFLAG00010448	AFLA_003820	536.838	829.142	-0.62713	0.0055414	-//-
CADAFLAG00010452	AFLA_003860	87.447	9.54592	3.1955	2.1033e-05	-//-
CADAFLAG00010458	AFLA_003920	390.44	690.468	-0.82247	0.00045333	sp|P50867|CYSK_EMENI Cysteine synthase OS=Emericella nidulans (strain FGSC A4 / ATCC 38163 / CBS 112.46 / NRRL 194 / M139) GN=cysB PE=3 SV=2//0
CADAFLAG00010459	AFLA_003930	250.833	420.244	-0.7445	0.012044	sp|P27968|NIA7_HORVU Nitrate reductase [NAD(P)H] OS=Hordeum vulgare GN=NAR-7 PE=2 SV=1//2.3141e-16
CADAFLAG00010476	AFLA_004100	441.691	159.271	1.4716	6.2903e-08	sp|Q9KX40|ESTB_BURGA Esterase EstB OS=Burkholderia gladioli GN=estB PE=1 SV=1//5.71301e-21
CADAFLAG00010484	AFLA_004180	423.569	276.784	0.61383	0.046075	-//-
CADAFLAG00010487	AFLA_004210	207.956	961.114	-2.2084	1.2346e-06	-//-
CADAFLAG00010515	AFLA_004490	124.816	2199.05	-4.139	0.00061714	-//-
CADAFLAG00010524	AFLA_004580	75.8907	234.086	-1.625	1.5686e-05	-//-
CADAFLAG00010532	AFLA_004660	1342.8	2487.19	-0.88928	4.0455e-09	sp|O93869|GYS_NEUCR Glycogen [starch] synthase OS=Neurospora crassa (strain ATCC 24698 / 74-OR23-1A / CBS 708.71 / DSM 1257 / FGSC 987) GN=7F4.080 PE=2 SV=2//5.34285e-21
CADAFLAG00010535	AFLA_004690	479.188	4136.03	-3.1096	9.2167e-23	-//-
CADAFLAG00010547	AFLA_004810	108.163	637.602	-2.5595	1.1134e-14	-//-
CADAFLAG00010561	AFLA_004950	1233.13	1664.96	-0.43316	0.020015	sp|Q01359|COX6_NEUCR Cytochrome c oxidase subunit 6, mitochondrial OS=Neurospora crassa (strain ATCC 24698 / 74-OR23-1A / CBS 708.71 / DSM 1257 / FGSC 987) GN=cox-6 PE=3 SV=2//1.50188e-07
CADAFLAG00010577	AFLA_005120	73.1253	401.94	-2.4585	2.1273e-17	sp|O43029|FAP1_SCHPO L-pipecolate oxidase OS=Schizosaccharomyces pombe (strain 972 / ATCC 24843) GN=fap1 PE=1 SV=1//1.95067e-38
CADAFLAG00010601	AFLA_005360	4535.53	3406.26	0.41308	0.0044175	sp|A6P6V9|CBDAS_CANSA Cannabidiolic acid synthase OS=Cannabis sativa GN=CBDAS PE=1 SV=1//3.22039e-19
CADAFLAG00010613	AFLA_005480	906.962	551.689	0.71719	0.00069427	sp|Q13423|NNTM_HUMAN NAD(P) transhydrogenase, mitochondrial OS=Homo sapiens GN=NNT PE=1 SV=3//5.92639e-08
CADAFLAG00010614	AFLA_005490	219.992	100.515	1.13	0.044813	sp|P07001|PNTA_ECOLI NAD(P) transhydrogenase subunit alpha OS=Escherichia coli (strain K12) GN=pntA PE=1 SV=2//3.95522e-35
CADAFLAG00010618	AFLA_005530	68.3109	149.208	-1.1271	0.023785	-//-
CADAFLAG00010619	AFLA_005540	500.626	271.577	0.88237	0.00099897	sp|Q921A2|MYCT_RAT Proton myo-inositol cotransporter OS=Rattus norvegicus GN=Slc2a13 PE=2 SV=2//1.86191e-17
CADAFLAG00010620	AFLA_005550	353.855	181.89	0.96009	0.0024103	-//-
CADAFLAG00010622	AFLA_005570	848.522	2149.87	-1.3412	1.0958e-06	sp|P94681|TSAC_COMTE 4-formylbenzenesulfonate dehydrogenase TsaC1/TsaC2 OS=Comamonas testosteroni GN=tsaC1 PE=1 SV=1//6.70142e-74
CADAFLAG00010634	AFLA_005690	774.229	527.94	0.55239	0.015448	sp|P40514|YIG7_YEAST Uncharacterized protein YIL067C OS=Saccharomyces cerevisiae (strain ATCC 204508 / S288c) GN=YIL067C PE=1 SV=1//1.04944e-53
CADAFLAG00010635	AFLA_005700	515.081	190.401	1.4358	9.8589e-09	sp|O14192|AATR1_SCHPO Aromatic amino acid aminotransferase C56E4.03 OS=Schizosaccharomyces pombe (strain 972 / ATCC 24843) GN=SPAC56E4.03 PE=2 SV=1//9.10737e-69
CADAFLAG00010637	AFLA_005720	5150.37	1982.96	1.377	1.6502e-29	-//-
CADAFLAG00010640	AFLA_005750	612.625	907.038	-0.56616	0.010475	sp|Q9Y7T0|YCJ3_SCHPO Uncharacterized J domain-containing protein C63.03 OS=Schizosaccharomyces pombe (strain 972 / ATCC 24843) GN=SPCC63.03 PE=2 SV=2//3.12828e-07
CADAFLAG00010652	AFLA_005870	552.41	342.348	0.69028	0.0073244	sp|P51599|GCH1_NEUCR GTP cyclohydrolase 1 OS=Neurospora crassa (strain ATCC 24698 / 74-OR23-1A / CBS 708.71 / DSM 1257 / FGSC 987) GN=104H10.80 PE=2 SV=2//2.20426e-109
CADAFLAG00010660	AFLA_005950	169.628	389.042	-1.1976	4.9384e-05	-//-
CADAFLAG00010665	AFLA_006000	268.044	462.941	-0.78836	0.0044527	-//-
CADAFLAG00010671	AFLA_006060	296.963	473.745	-0.67383	0.018189	-//-
CADAFLAG00010673	AFLA_006080	63.4301	478.706	-2.9159	6.5224e-25	-//-
CADAFLAG00010675	AFLA_006100	1180.46	1602.88	-0.44131	0.019862	-//-
CADAFLAG00010676	AFLA_006110	1392.58	929.904	0.58261	0.0013648	-//-
CADAFLAG00010687	AFLA_006220	244.58	388.573	-0.66788	0.041696	sp|P38698|PPX1_YEAST Exopolyphosphatase OS=Saccharomyces cerevisiae (strain ATCC 204508 / S288c) GN=PPX1 PE=1 SV=1//5.08667e-24
CADAFLAG00010700	AFLA_006350	842.62	1412.85	-0.74566	3.9375e-05	sp|P52214|TRXB_MYCTU Thioredoxin reductase OS=Mycobacterium tuberculosis GN=trxB PE=1 SV=2//1.20949e-12
CADAFLAG00010707	AFLA_006420	690.635	1088.88	-0.65685	0.00098707	sp|P0C8Q0|UBX1_EMENI UBX domain-containing protein 1 OS=Emericella nidulans (strain FGSC A4 / ATCC 38163 / CBS 112.46 / NRRL 194 / M139) GN=ubx1 PE=3 SV=1//2.39179e-15
CADAFLAG00010715	AFLA_006520	1037.78	698.086	0.57203	0.0056896	sp|Q2UA18|SFH5_ASPOR Phosphatidylinositol transfer protein sfh5 OS=Aspergillus oryzae (strain ATCC 42149 / RIB 40) GN=sfh5 PE=3 SV=1//3.00356e-101
CADAFLAG00010720	AFLA_006570	421.457	780.155	-0.88837	5.0711e-05	sp|Q8J0F0|CEFD2_ACRCH Isopenicillin N epimerase component 2 OS=Acremonium chrysogenum GN=cefD2 PE=3 SV=1//4.52709e-155
CADAFLAG00010721	AFLA_006580	1104.86	1509.86	-0.45056	0.021475	-//-
CADAFLAG00010724	AFLA_006610	852.566	1383.67	-0.69862	0.00017006	sp|Q9US38|YFZ3_SCHPO AB hydrolase superfamily protein C1039.03 OS=Schizosaccharomyces pombe (strain 972 / ATCC 24843) GN=SPAC1039.03 PE=2 SV=1//1.05616e-37
CADAFLAG00010729	AFLA_006660	470.868	686.765	-0.54449	0.029842	sp|P42251|PPBD_BACSU Alkaline phosphatase D OS=Bacillus subtilis (strain 168) GN=phoD PE=1 SV=3//1.32706e-08
CADAFLAG00010731	AFLA_006680	209.176	115.268	0.85973	0.041523	sp|Q9UTD7|RRP15_SCHPO Ribosomal RNA-processing protein 15 OS=Schizosaccharomyces pombe (strain 972 / ATCC 24843) GN=rrp15 PE=2 SV=1//3.30452e-07
CADAFLAG00010736	AFLA_006730	304.127	762.686	-1.3264	4.875e-10	sp|O06012|ADHB_BACSU Uncharacterized zinc-type alcohol dehydrogenase-like protein AdhB OS=Bacillus subtilis (strain 168) GN=adhB PE=3 SV=2//1.03412e-14
CADAFLAG00010738	AFLA_006750	394.665	607.141	-0.6214	0.01565	sp|P14904|AMPL_YEAST Vacuolar aminopeptidase 1 OS=Saccharomyces cerevisiae (strain ATCC 204508 / S288c) GN=LAP4 PE=1 SV=2//1.16386e-129
CADAFLAG00010761	AFLA_006980	573.855	371.997	0.6254	0.01643	sp|P20824|NUC1_NEUCR Phosphorus acquisition-controlling protein OS=Neurospora crassa (strain ATCC 24698 / 74-OR23-1A / CBS 708.71 / DSM 1257 / FGSC 987) GN=nuc-1 PE=4 SV=1//9.70873e-09
CADAFLAG00010763	AFLA_007000	1109.36	1532.31	-0.46598	0.013194	sp|O60044|QCR2_NEUCR Cytochrome b-c1 complex subunit 2, mitochondrial OS=Neurospora crassa (strain ATCC 24698 / 74-OR23-1A / CBS 708.71 / DSM 1257 / FGSC 987) GN=qcr-2 PE=2 SV=2//3.32797e-12
CADAFLAG00010764	AFLA_007010	6753.16	10833.4	-0.68185	0.00012907	sp|Q04013|YHM2_YEAST Mitochondrial DNA replication protein YHM2 OS=Saccharomyces cerevisiae (strain ATCC 204508 / S288c) GN=YHM2 PE=1 SV=1//4.69843e-103
CADAFLAG00010765	AFLA_007020	2202.71	3546.57	-0.68714	2.4324e-06	sp|P51044|CISY_ASPNG Citrate synthase, mitochondrial OS=Aspergillus niger GN=cit-1 PE=2 SV=1//5.91458e-07
CADAFLAG00010768	AFLA_007050	4274.43	5543	-0.37493	0.015468	-//-
CADAFLAG00010770	AFLA_007070	3438.09	4402.8	-0.35681	0.021961	sp|Q8LKS5|LACS7_ARATH Long chain acyl-CoA synthetase 7, peroxisomal OS=Arabidopsis thaliana GN=LACS7 PE=1 SV=2//6.58186e-121
CADAFLAG00010774	AFLA_007110	2223.39	3779.11	-0.76528	6.3045e-08	sp|P21245|PM47A_CANBO Peroxisomal membrane protein PMP47A OS=Candida boidinii GN=PMP47A PE=1 SV=1//7.84145e-54
CADAFLAG00010808	AFLA_048160	559.807	375.547	0.57594	0.039992	sp|P47082|AVT1_YEAST Vacuolar amino acid transporter 1 OS=Saccharomyces cerevisiae (strain ATCC 204508 / S288c) GN=AVT1 PE=1 SV=1//1.37071e-06
CADAFLAG00010822	AFLA_048300	946.644	677.219	0.4832	0.033545	sp|O13657|YBCC_SCHPO Putative metal ion transporter C27B12.12c OS=Schizosaccharomyces pombe (strain 972 / ATCC 24843) GN=pi066 PE=1 SV=1//5.12633e-121
CADAFLAG00010826	AFLA_048340	454.893	669.847	-0.5583	0.035566	sp|Q06892|POS5_YEAST NADH kinase POS5, mitochondrial OS=Saccharomyces cerevisiae (strain ATCC 204508 / S288c) GN=POS5 PE=1 SV=2//8.08267e-78
CADAFLAG00010836	AFLA_048440	428.474	1149.25	-1.4234	4.6449e-05	-//-
CADAFLAG00010853	AFLA_048610	1354.98	1924.31	-0.50608	0.0039528	sp|Q9P727|SUCA_NEUCR Probable succinyl-CoA ligase [ADP-forming] subunit alpha, mitochondrial OS=Neurospora crassa (strain ATCC 24698 / 74-OR23-1A / CBS 708.71 / DSM 1257 / FGSC 987) GN=8D4.130 PE=3 SV=1//6.05728e-09
CADAFLAG00010861	AFLA_048690	2167.56	5225.94	-1.2696	1.3922e-21	sp|P41747|ADH1_ASPFN Alcohol dehydrogenase 1 OS=Aspergillus flavus (strain ATCC 200026 / FGSC A1120 / NRRL 3357 / JCM 12722 / SRRC 167) GN=adh1 PE=2 SV=2//3.04994e-74
CADAFLAG00010866	AFLA_048740	534.839	836.713	-0.64563	0.0037713	sp|Q01497|PEX3_PICAN Peroxisomal biogenesis factor 3 OS=Pichia angusta GN=PEX3 PE=3 SV=1//1.08109e-12
CADAFLAG00010868	AFLA_048760	2838.65	3651.29	-0.3632	0.027661	sp|Q4WTW3|YOP1_ASPFU Protein yop1 OS=Neosartorya fumigata (strain ATCC MYA-4609 / Af293 / CBS 101355 / FGSC A1100) GN=yop1 PE=3 SV=1//3.55551e-54
CADAFLAG00010894	AFLA_049020	1828.34	4777.18	-1.3856	2.0003e-22	sp|Q5ZHT1|ACD11_CHICK Acyl-CoA dehydrogenase family member 11 OS=Gallus gallus GN=ACAD11 PE=2 SV=1//5.79286e-134
CADAFLAG00010895	AFLA_049030	778.191	451.174	0.78644	0.00033355	sp|P53145|LSG1_YEAST Large subunit GTPase 1 OS=Saccharomyces cerevisiae (strain ATCC 204508 / S288c) GN=LSG1 PE=1 SV=1//4.68074e-180
CADAFLAG00010897	AFLA_049050	40.4252	102.242	-1.3387	0.02855	sp|A3KG59|P20D2_MOUSE Peptidase M20 domain-containing protein 2 OS=Mus musculus GN=Pm20d2 PE=2 SV=1//2.15099e-85
CADAFLAG00010899	AFLA_049070	169.318	74.8626	1.1774	0.013002	sp|Q12691|ATN5_YEAST Sodium transport ATPase 5 OS=Saccharomyces cerevisiae (strain ATCC 204508 / S288c) GN=ENA5 PE=1 SV=1//0
CADAFLAG00010900	AFLA_049080	1422.46	2138.64	-0.5883	0.00031669	sp|P32451|BIOB_YEAST Biotin synthase, mitochondrial OS=Saccharomyces cerevisiae (strain ATCC 204508 / S288c) GN=BIO2 PE=1 SV=2//4.03565e-146
CADAFLAG00010902	AFLA_049100	83.1894	213.983	-1.363	0.00073637	sp|B3QLR6|BIOF_CHLP8 8-amino-7-oxononanoate synthase OS=Chlorobaculum parvum (strain NCIB 8327) GN=Cpar_2015 PE=3 SV=2//2.87511e-53
CADAFLAG00010915	AFLA_049230	361.123	211.985	0.76853	0.014516	sp|B6HI95|LAD_PENCW L-arabinitol 4-dehydrogenase OS=Penicillium chrysogenum (strain ATCC 28089 / DSM 1075 / Wisconsin 54-1255) GN=lad1 PE=1 SV=1//9.58084e-129
CADAFLAG00010922	AFLA_049300	983.848	521.817	0.91489	0.00015161	sp|Q08972|NEW1_YEAST [NU+] prion formation protein 1 OS=Saccharomyces cerevisiae (strain ATCC 204508 / S288c) GN=NEW1 PE=1 SV=1//0
CADAFLAG00010929	AFLA_049370	1088.04	1560.71	-0.52048	0.01107	sp|Q9SCU0|SDR2A_ARATH Short-chain dehydrogenase reductase 2a OS=Arabidopsis thaliana GN=SDR2a PE=3 SV=1//3.6019e-23
CADAFLAG00010931	AFLA_049390	11676.2	22317	-0.93457	4.0205e-15	sp|P28344|MASY_EMENI Malate synthase, glyoxysomal OS=Emericella nidulans (strain FGSC A4 / ATCC 38163 / CBS 112.46 / NRRL 194 / M139) GN=acuE PE=3 SV=3//0
CADAFLAG00010946	AFLA_049540	3640.66	1652.22	1.1398	1.1865e-18	-//-
CADAFLAG00010949	AFLA_049570	128.447	9.29909	3.7879	3.5142e-09	sp|O74923|YJ7D_SCHPO Uncharacterized transporter C757.13 OS=Schizosaccharomyces pombe (strain 972 / ATCC 24843) GN=SPCC757.13 PE=2 SV=1//9.47711e-15
CADAFLAG00010966	AFLA_049740	98.0413	29.6251	1.7266	0.0054928	sp|P07921|LACP_KLULA Lactose permease OS=Kluyveromyces lactis (strain ATCC 8585 / CBS 2359 / DSM 70799 / NBRC 1267 / NRRL Y-1140 / WM37) GN=LAC12 PE=3 SV=1//5.54311e-97
CADAFLAG00010968	AFLA_049760	261.107	97.2345	1.4251	7.8156e-05	sp|P08045|XFIN_XENLA Zinc finger protein Xfin OS=Xenopus laevis PE=1 SV=1//6.80543e-06
CADAFLAG00010970	AFLA_049780	810.593	405.69	0.9986	1.4768e-06	sp|E9JFX9|DMOA_HYPSL Dimethyl-sulfide monooxygenase OS=Hyphomicrobium sulfonivorans GN=dmoA PE=1 SV=1//6.0288e-08
CADAFLAG00010984	AFLA_049920	2768.54	3691.21	-0.41497	0.010853	sp|O14359|YB4E_SCHPO Uncharacterized AIM2 family protein C30D10.14 OS=Schizosaccharomyces pombe (strain 972 / ATCC 24843) GN=SPBC30D10.14 PE=2 SV=1//1.80621e-31
CADAFLAG00010989	AFLA_049970	801.686	1242.16	-0.63174	0.0008979	sp|B8NSP6|M28P1_ASPFN Probable zinc metalloprotease AFLA_049970 OS=Aspergillus flavus (strain ATCC 200026 / FGSC A1120 / NRRL 3357 / JCM 12722 / SRRC 167) GN=AFLA_049970 PE=3 SV=1//3.81045e-27
CADAFLAG00010991	AFLA_049990	560.149	801.563	-0.51701	0.029786	sp|Q8VZF1|AEE7_ARATH Acetate/butyrate--CoA ligase AAE7, peroxisomal OS=Arabidopsis thaliana GN=AAE7 PE=1 SV=1//1.42149e-13
CADAFLAG00011006	AFLA_050140	488.983	803.315	-0.71618	0.0011399	-//-
CADAFLAG00011009	AFLA_050170	312.218	124.591	1.3254	3.8719e-05	sp|Q9HFE4|FMO1_SCHPO Thiol-specific monooxygenase OS=Schizosaccharomyces pombe (strain 972 / ATCC 24843) GN=fmo1 PE=1 SV=1//6.66442e-54
CADAFLAG00011013	AFLA_050210	446.314	805.783	-0.85233	8.1591e-05	-//-
CADAFLAG00011022	AFLA_050300	135.465	26.8862	2.333	1.6366e-05	sp|Q870J1|STE11_PNECA HMG-box protein STE11 OS=Pneumocystis carinii PE=1 SV=1//3.95844e-08
CADAFLAG00011027	AFLA_050350	185.689	330.357	-0.83114	0.0094622	-//-
CADAFLAG00011033	AFLA_050410	2662.11	3790.98	-0.51	0.00079743	-//-
CADAFLAG00011037	AFLA_050450	153.342	361.686	-1.238	4.2044e-05	-//-
CADAFLAG00011041	AFLA_050490	127.505	58.016	1.136	0.045377	sp|Q2UU72|TRMB_ASPOR tRNA (guanine-N(7)-)-methyltransferase OS=Aspergillus oryzae (strain ATCC 42149 / RIB 40) GN=trm8 PE=3 SV=1//0
CADAFLAG00011051	AFLA_050590	227.73	1239.11	-2.4439	1.6604e-06	-//-
CADAFLAG00011055	AFLA_050630	465.558	944.187	-1.0201	3.6599e-07	sp|P39522|ILV3_YEAST Dihydroxy-acid dehydratase, mitochondrial OS=Saccharomyces cerevisiae (strain ATCC 204508 / S288c) GN=ILV3 PE=1 SV=2//0
CADAFLAG00011061	AFLA_050690	14785.3	18481.8	-0.32194	0.021692	sp|Q09188|ADT_SCHPO ADP,ATP carrier protein OS=Schizosaccharomyces pombe (strain 972 / ATCC 24843) GN=anc1 PE=2 SV=1//7.52162e-50
CADAFLAG00011074	AFLA_050820	85.6523	169.287	-0.98291	0.043416	sp|A8G7R4|DGOD_SERP5 D-galactonate dehydratase OS=Serratia proteamaculans (strain 568) GN=dgoD PE=3 SV=1//4.86567e-118
CADAFLAG00011090	AFLA_050990	64.6624	144.423	-1.1593	0.024816	sp|O74799|EXG3_SCHPO Glucan 1,3-beta-glucosidase 3 OS=Schizosaccharomyces pombe (strain 972 / ATCC 24843) GN=exg3 PE=2 SV=1//6.90017e-32
CADAFLAG00011095	AFLA_051040	935.945	549.69	0.7678	0.00029806	-//-
CADAFLAG00011096	AFLA_051050	298.745	636.567	-1.0914	1.8701e-06	-//-
CADAFLAG00011104	AFLA_051130	403.677	193.928	1.0577	0.00022181	sp|Q8VCC1|PGDH_MOUSE 15-hydroxyprostaglandin dehydrogenase [NAD(+)] OS=Mus musculus GN=Hpgd PE=2 SV=1//9.44557e-19
CADAFLAG00011105	AFLA_051140	687.22	1041.47	-0.59978	0.0033026	sp|B8NRX2|BGLA_ASPFN Probable beta-glucosidase A OS=Aspergillus flavus (strain ATCC 200026 / FGSC A1120 / NRRL 3357 / JCM 12722 / SRRC 167) GN=bglA PE=3 SV=1//0
CADAFLAG00011106	AFLA_051150	310.117	806.547	-1.3789	1.0222e-10	sp|Q9HGM4|SCS3_SCHPO FIT family protein scs3 OS=Schizosaccharomyces pombe (strain 972 / ATCC 24843) GN=scs3 PE=2 SV=1//5.84178e-31
CADAFLAG00011109	AFLA_051180	31.3765	143.213	-2.1904	0.0003799	sp|O53475|Y2030_MYCTU Uncharacterized protein Rv2030c/MT2089 OS=Mycobacterium tuberculosis GN=Rv2030c PE=2 SV=1//4.86928e-74
CADAFLAG00011116	AFLA_051250	2202.88	3848.06	-0.80474	2.6444e-06	-//-
CADAFLAG00011124	AFLA_051330	138.583	28.1441	2.2998	1.6626e-05	sp|B5BP48|YP54_SCHPO Putative alpha-ketoglutarate-dependent sulfonate dioxygenase OS=Schizosaccharomyces pombe (strain 972 / ATCC 24843) GN=SPBC460.04c PE=3 SV=1//6.68567e-30
CADAFLAG00011127	AFLA_051360	4375.94	13859.5	-1.6632	3.2e-41	sp|Q10327|YD72_SCHPO Uncharacterized protein C32A11.02c OS=Schizosaccharomyces pombe (strain 972 / ATCC 24843) GN=SPAC32A11.02c PE=2 SV=1//1.06249e-08
CADAFLAG00011128	AFLA_051370	712.275	452.456	0.65466	0.0068292	sp|O74197|PUR6_CANGA Phosphoribosylaminoimidazole carboxylase OS=Candida glabrata (strain ATCC 2001 / CBS 138 / JCM 3761 / NBRC 0622 / NRRL Y-65) GN=ADE2 PE=3 SV=2//7.52242e-109
CADAFLAG00011138	AFLA_051470	125.071	317.507	-1.344	2.1722e-05	sp|O00058|MTDH_UROFA Probable NADP-dependent mannitol dehydrogenase OS=Uromyces fabae GN=PIG8 PE=2 SV=1//7.02938e-40
CADAFLAG00011143	AFLA_051520	9440.71	12640.4	-0.42108	0.0024217	-//-
CADAFLAG00011144	AFLA_051530	2348.06	4094.77	-0.80231	9.7959e-09	sp|Q02253|MMSA_RAT Methylmalonate-semialdehyde dehydrogenase [acylating], mitochondrial OS=Rattus norvegicus GN=Aldh6a1 PE=1 SV=1//6.7394e-44
CADAFLAG00011153	AFLA_051620	231.264	384.106	-0.73197	0.016263	-//-
CADAFLAG00011168	AFLA_051770	3081.84	1814.37	0.76432	4.021e-08	sp|P43496|TRXB_PENCH Thioredoxin reductase OS=Penicillium chrysogenum GN=TRR1 PE=1 SV=3//0
CADAFLAG00011174	AFLA_051830	1076.06	354.879	1.6004	3.097e-18	-//-
CADAFLAG00011180	AFLA_051890	5129.22	3133.36	0.71103	2.6456e-08	sp|P39932|STL1_YEAST Sugar transporter STL1 OS=Saccharomyces cerevisiae (strain ATCC 204508 / S288c) GN=STL1 PE=1 SV=2//4.18615e-06
CADAFLAG00011184	AFLA_051930	11631.2	7720.98	0.59115	6.275e-07	sp|Q96V52|GLNA_EMENI Glutamine synthetase OS=Emericella nidulans (strain FGSC A4 / ATCC 38163 / CBS 112.46 / NRRL 194 / M139) GN=glnA PE=3 SV=3//6.86458e-07
CADAFLAG00011187	AFLA_051960	158.151	295.924	-0.90392	0.0078231	sp|Q04471|YM04_YEAST Uncharacterized protein YMR114C OS=Saccharomyces cerevisiae (strain ATCC 204508 / S288c) GN=YMR114C PE=1 SV=1//4.52313e-08
CADAFLAG00011190	AFLA_051990	247.503	893.623	-1.8522	2.1495e-14	sp|B8NT06|SDHF2_ASPFN Succinate dehydrogenase assembly factor 2, mitochondrial OS=Aspergillus flavus (strain ATCC 200026 / FGSC A1120 / NRRL 3357 / JCM 12722 / SRRC 167) GN=emi5 PE=3 SV=1//3.33927e-97
CADAFLAG00011195	AFLA_052040	133.48	295.9	-1.1485	0.00057799	-//-
CADAFLAG00011210	AFLA_052190	2591.74	1935.04	0.42156	0.012697	-//-
CADAFLAG00011216	AFLA_052250	374.192	208.999	0.84028	0.0067289	-//-
CADAFLAG00011231	AFLA_052400	19971.1	36725.6	-0.87887	1.2336e-13	sp|Q6T267|ACEA_ASPFU Isocitrate lyase OS=Neosartorya fumigata (strain ATCC MYA-4609 / Af293 / CBS 101355 / FGSC A1100) GN=icl1 PE=3 SV=2//2.24497e-13
CADAFLAG00011233	AFLA_052420	281.54	143.436	0.97293	0.0060236	sp|P28584|TRK2_YEAST Low-affinity potassium transport protein OS=Saccharomyces cerevisiae (strain ATCC 204508 / S288c) GN=TRK2 PE=1 SV=1//1.62184e-105
CADAFLAG00011234	AFLA_052430	683.622	1048.32	-0.61681	0.0065558	sp|O42777|TREB_EMENI Neutral trehalase OS=Emericella nidulans (strain FGSC A4 / ATCC 38163 / CBS 112.46 / NRRL 194 / M139) GN=treB PE=3 SV=2//0
CADAFLAG00011242	AFLA_052510	4108.03	3115.65	0.39891	0.0098733	sp|Q12215|WSC3_YEAST Cell wall integrity and stress response component 3 OS=Saccharomyces cerevisiae (strain ATCC 204508 / S288c) GN=WSC3 PE=1 SV=1//6.89697e-09
CADAFLAG00011244	AFLA_052530	529.976	934.37	-0.81807	7.7431e-05	sp|P08456|PSS_YEAST CDP-diacylglycerol--serine O-phosphatidyltransferase OS=Saccharomyces cerevisiae (strain ATCC 204508 / S288c) GN=CHO1 PE=1 SV=3//4.74745e-12
CADAFLAG00011252	AFLA_052610	564.87	999.934	-0.82391	4.4712e-05	sp|P55809|SCOT1_HUMAN Succinyl-CoA:3-ketoacid coenzyme A transferase 1, mitochondrial OS=Homo sapiens GN=OXCT1 PE=1 SV=1//3.15772e-25
CADAFLAG00011267	AFLA_052760	793.168	550.336	0.52731	0.024778	sp|Q12205|MNL2_YEAST Putative endoplasmic reticulum mannosidase MNL2 OS=Saccharomyces cerevisiae (strain ATCC 204508 / S288c) GN=MNL2 PE=1 SV=1//2.64639e-35
CADAFLAG00011272	AFLA_052810	2325.99	645.596	1.8491	1.9521e-36	sp|P0C956|GEL4_ASPFU 1,3-beta-glucanosyltransferase gel4 OS=Neosartorya fumigata (strain ATCC MYA-4609 / Af293 / CBS 101355 / FGSC A1100) GN=gel4 PE=3 SV=1//1.37232e-180
CADAFLAG00011274	AFLA_052830	121.729	328.017	-1.4301	6.9199e-06	sp|O42953|YGM4_SCHPO HMG box-containing protein C19G7.04 OS=Schizosaccharomyces pombe (strain 972 / ATCC 24843) GN=SPBC19G7.04 PE=2 SV=2//7.48137e-38
CADAFLAG00011277	AFLA_052860	28175.3	53908.7	-0.93609	1.0669e-05	sp|P50519|HSP9_SCHPO Heat shock protein hsp9 OS=Schizosaccharomyces pombe (strain 972 / ATCC 24843) GN=hsp9 PE=2 SV=1//5.65606e-13
CADAFLAG00011284	AFLA_052930	371.15	162.551	1.1911	7.6678e-05	sp|A0R4H4|Y5835_MYCS2 KsdD-like steroid dehydrogenase MSMEG_5835 OS=Mycobacterium smegmatis (strain ATCC 700084 / mc(2)155) GN=MSMEG_5835 PE=1 SV=1//4.77922e-33
CADAFLAG00011287	AFLA_052960	640.627	441.827	0.536	0.040072	sp|Q5UNW1|YR707_MIMIV Uncharacterized protein R707 OS=Acanthamoeba polyphaga mimivirus GN=MIMI_R707 PE=4 SV=1//3.36177e-17
CADAFLAG00011293	AFLA_053030	36.7587	5.2785	2.7999	0.044719	sp|Q0VCN1|NMRL1_BOVIN NmrA-like family domain-containing protein 1 OS=Bos taurus GN=NMRAL1 PE=2 SV=1//1.23449e-34
CADAFLAG00011296	AFLA_053060	584.537	945.15	-0.69325	0.0010837	sp|Q9GLW7|PRDX5_CHLAE Peroxiredoxin-5, mitochondrial OS=Chlorocebus aethiops GN=PRDX5 PE=2 SV=1//3.09872e-13
CADAFLAG00011299	AFLA_053090	285.269	136.652	1.0618	0.0021263	-//-
CADAFLAG00011306	AFLA_053160	7813.5	19241.4	-1.3002	3.8284e-27	sp|O67890|FMT_AQUAE Methionyl-tRNA formyltransferase OS=Aquifex aeolicus (strain VF5) GN=fmt PE=3 SV=1//8.19507e-09
CADAFLAG00011307	AFLA_053170	2340.9	4104.02	-0.80998	7.2029e-09	sp|Q9P786|MTD1_SCHPO Methylenetetrahydrofolate dehydrogenase [NAD(+)] OS=Schizosaccharomyces pombe (strain 972 / ATCC 24843) GN=mtd1 PE=2 SV=1//7.63844e-62
CADAFLAG00011309	AFLA_053190	95.5875	221.578	-1.2129	0.0014426	-//-
CADAFLAG00011321	AFLA_053310	470.168	292.174	0.68635	0.020219	sp|Q10097|YAOI_SCHPO Uncharacterized transporter C11D3.18C OS=Schizosaccharomyces pombe (strain 972 / ATCC 24843) GN=SPAC11D3.18c PE=2 SV=1//1.50099e-65
CADAFLAG00011323	AFLA_053330	1100.33	1539.09	-0.48414	0.0092952	-//-
CADAFLAG00011324	AFLA_053340	255.612	102.983	1.3115	0.00024831	sp|Q57725|ILVB_METJA Probable acetolactate synthase large subunit OS=Methanocaldococcus jannaschii (strain ATCC 43067 / DSM 2661 / JAL-1 / JCM 10045 / NBRC 100440) GN=ilvB PE=3 SV=1//5.61007e-15
CADAFLAG00011342	AFLA_053520	227.225	495.353	-1.1243	1.333e-05	sp|Q12120|OMTA_ASPPA Sterigmatocystin 8-O-methyltransferase OS=Aspergillus parasiticus GN=omtA PE=1 SV=1//8.15015e-28
CADAFLAG00011353	AFLA_053630	108.462	205.743	-0.92365	0.027354	sp|P87219|SOU1_CANAL Sorbose reductase SOU1 OS=Candida albicans (strain SC5314 / ATCC MYA-2876) GN=SOU1 PE=1 SV=1//1.76728e-65
CADAFLAG00011354	AFLA_053640	2006.1	1274.86	0.65405	4.5361e-05	sp|P08159|HDNO_ARTOX 6-hydroxy-D-nicotine oxidase OS=Arthrobacter oxidans PE=1 SV=2//1.42639e-18
CADAFLAG00011358	AFLA_053680	47.5341	459.884	-3.2742	2.2085e-30	-//-
CADAFLAG00011366	AFLA_053760	372.685	226.61	0.71775	0.031954	-//-
CADAFLAG00011371	AFLA_053810	2863.07	1261.15	1.1828	3.6706e-18	sp|B5BP48|YP54_SCHPO Putative alpha-ketoglutarate-dependent sulfonate dioxygenase OS=Schizosaccharomyces pombe (strain 972 / ATCC 24843) GN=SPBC460.04c PE=3 SV=1//1.18762e-14
CADAFLAG00011372	AFLA_053820	2297.26	925.095	1.3122	8.1724e-20	sp|Q9HFE4|FMO1_SCHPO Thiol-specific monooxygenase OS=Schizosaccharomyces pombe (strain 972 / ATCC 24843) GN=fmo1 PE=1 SV=1//3.16139e-35
CADAFLAG00011373	AFLA_053830	387.872	93.7076	2.0493	7.3525e-12	sp|O43000|LIZ1_SCHPO Pantothenate transporter liz1 OS=Schizosaccharomyces pombe (strain 972 / ATCC 24843) GN=liz1 PE=2 SV=2//4.90305e-94
CADAFLAG00011388	AFLA_053980	401.497	197.925	1.0204	0.00033355	-//-
CADAFLAG00011391	AFLA_054010	694.469	1227.33	-0.82154	8.7712e-06	sp|Q92341|STR3_SCHPO Siderophore iron transporter 3 OS=Schizosaccharomyces pombe (strain 972 / ATCC 24843) GN=str3 PE=1 SV=1//1.96921e-60
CADAFLAG00011395	AFLA_054050	1497.6	995.268	0.5895	0.00099586	sp|P43071|CDR1_CANAX Multidrug resistance protein CDR1 OS=Candida albicans GN=CDR1 PE=3 SV=1//4.42603e-11
CADAFLAG00011414	AFLA_054240	56.9069	13.5665	2.0686	0.03174	-//-
CADAFLAG00011423	AFLA_054330	13.3204	74.8626	-2.4906	0.00036358	sp|B3Q9N8|Y1987_RHOPT UPF0311 protein Rpal_1987 OS=Rhodopseudomonas palustris (strain TIE-1) GN=Rpal_1987 PE=3 SV=1//4.88181e-08
CADAFLAG00011427	AFLA_054370	9.95852	80.3642	-3.0125	1.2555e-05	sp|P50167|ARDH_PICST D-arabinitol 2-dehydrogenase [ribulose-forming] OS=Scheffersomyces stipitis (strain ATCC 58785 / CBS 6054 / NBRC 10063 / NRRL Y-11545) GN=ARDH PE=2 SV=1//2.39211e-37
CADAFLAG00011439	AFLA_054490	49.481	188.403	-1.9289	3.2125e-06	sp|P38680|MTR_NEUCR N amino acid transport system protein OS=Neurospora crassa (strain ATCC 24698 / 74-OR23-1A / CBS 708.71 / DSM 1257 / FGSC 987) GN=mtr PE=3 SV=2//3.23201e-59
CADAFLAG00011445	AFLA_054550	85.1651	247.382	-1.5384	2.9316e-05	sp|Q8ZK57|IOLG_SALTY Inositol 2-dehydrogenase OS=Salmonella typhimurium (strain LT2 / SGSC1412 / ATCC 700720) GN=iolG PE=1 SV=1//4.78569e-13
CADAFLAG00011462	AFLA_097240	324.535	191.388	0.76187	0.023342	sp|Q8AV19|AAED1_TAKRU Thioredoxin-like protein AAED1 OS=Takifugu rubripes GN=aaed1 PE=3 SV=1//4.7115e-14
CADAFLAG00011464	AFLA_097260	703.921	978.891	-0.47574	0.035927	sp|Q5U752|MX_SOLSE Interferon-induced GTP-binding protein Mx OS=Solea senegalensis GN=mx PE=2 SV=1//2.19252e-16
CADAFLAG00011474	AFLA_097360	315.305	132.409	1.2518	0.00020636	sp|P46030|PTR2_CANAX Peptide transporter PTR2 OS=Candida albicans GN=PTR2 PE=3 SV=1//1.51708e-128
CADAFLAG00011475	AFLA_097370	230.923	1175.71	-2.348	2.3109e-33	-//-
CADAFLAG00011476	AFLA_097380	537.176	1133.53	-1.0774	1.5471e-08	sp|Q5M7R9|GRHL2_XENTR Grainyhead-like protein 2 homolog OS=Xenopus tropicalis GN=grhl2 PE=2 SV=1//1.02739e-14
CADAFLAG00011481	AFLA_097430	131.236	22.1013	2.57	3.1726e-06	-//-
CADAFLAG00011482	AFLA_097440	64.9615	17.0934	1.9261	0.034161	-//-
CADAFLAG00011485	AFLA_097470	3074.62	1861.43	0.724	3.1682e-07	sp|Q12645|PID9_FUSSO Pisatin demethylase OS=Fusarium solani subsp. pisi GN=PDAT9 PE=3 SV=1//2.88899e-65
CADAFLAG00011488	AFLA_097500	4.6497	46.9653	-3.3364	0.00046512	sp|Q96UY2|DGT2A_UMBRA Diacylglycerol O-acyltransferase 2A OS=Umbelopsis ramanniana GN=DGAT2A PE=1 SV=1//2.16715e-52
CADAFLAG00011501	AFLA_097630	95.0986	12.3086	2.9498	2.28e-05	-//-
CADAFLAG00011503	AFLA_097650	167.187	32.1647	2.3779	8.0753e-07	sp|P16273|PRPX_HORVU Pathogen-related protein OS=Hordeum vulgare PE=2 SV=2//2.44207e-17
CADAFLAG00011507	AFLA_097690	143.999	27.133	2.4079	3.99e-06	sp|Q5RLY7|CDO_AJECG Cysteine dioxygenase OS=Ajellomyces capsulata (strain G186AR / H82 / ATCC MYA-2454 / RMSCC 2432) GN=CDO1 PE=2 SV=2//3.91896e-53
CADAFLAG00011508	AFLA_097700	318.481	474.557	-0.57537	0.04686	sp|O29003|Y1265_ARCFU UPF0173 metal-dependent hydrolase AF_1265 OS=Archaeoglobus fulgidus (strain ATCC 49558 / VC-16 / DSM 4304 / JCM 9628 / NBRC 100126) GN=AF_1265 PE=3 SV=1//1.91387e-16
CADAFLAG00011513	AFLA_097750	44370.5	30814.9	0.52598	3.7624e-06	-//-
CADAFLAG00011527	AFLA_097890	610.198	2093.33	-1.7784	4.4221e-28	sp|O33833|BFRA_THEMA Beta-fructosidase OS=Thermotoga maritima (strain ATCC 43589 / MSB8 / DSM 3109 / JCM 10099) GN=bfrA PE=1 SV=1//2.78802e-11
CADAFLAG00011547	AFLA_098090	466.362	746.286	-0.67828	0.0031496	sp|O74352|HOB1_SCHPO Protein hob1 OS=Schizosaccharomyces pombe (strain 972 / ATCC 24843) GN=hob1 PE=1 SV=1//7.85454e-16
CADAFLAG00011552	AFLA_098140	122.162	420.467	-1.7832	2.6849e-10	sp|Q08777|MCH5_YEAST Riboflavin transporter MCH5 OS=Saccharomyces cerevisiae (strain ATCC 204508 / S288c) GN=MCH5 PE=1 SV=2//2.1301e-19
CADAFLAG00011562	AFLA_098240	296.216	1050.08	-1.8258	1.1473e-11	sp|B8NTI4|XKS1_ASPFN Probable D-xylulose kinase A OS=Aspergillus flavus (strain ATCC 200026 / FGSC A1120 / NRRL 3357 / JCM 12722 / SRRC 167) GN=xkiA PE=2 SV=1//9.15594e-107
CADAFLAG00011567	AFLA_098290	1754.32	2439.04	-0.4754	0.028222	sp|O74882|SDH3_SCHPO Succinate dehydrogenase cytochrome B subunit, mitochondrial OS=Schizosaccharomyces pombe (strain 972 / ATCC 24843) GN=sdh3 PE=2 SV=1//9.22855e-25
CADAFLAG00011568	AFLA_098300	204.354	441.111	-1.1101	4.1419e-05	sp|Q21ZD6|TAL_RHOFD Transaldolase OS=Rhodoferax ferrireducens (strain DSM 15236 / ATCC BAA-621 / T118) GN=tal PE=3 SV=1//7.26804e-26
CADAFLAG00011570	AFLA_098320	1037.72	505.416	1.0379	3.173e-08	sp|A5H0J3|URC4_LACKL Uracil catabolism protein 4 OS=Lachancea kluyveri GN=URC4 PE=3 SV=1//5.5023e-39
CADAFLAG00011573	AFLA_098350	987.266	711.9	0.47176	0.03794	sp|Q09860|SYC_SCHPO Probable cysteine--tRNA ligase OS=Schizosaccharomyces pombe (strain 972 / ATCC 24843) GN=SPAC29E6.06c PE=2 SV=1//1.11305e-175
CADAFLAG00011574	AFLA_098360	3670.64	4895.12	-0.41531	0.0056366	sp|Q9I4V0|2NPD_PSEAE Nitronate monooxygenase OS=Pseudomonas aeruginosa (strain ATCC 15692 / PAO1 / 1C / PRS 101 / LMG 12228) GN=PA1024 PE=1 SV=1//5.67591e-104
CADAFLAG00011576	AFLA_098380	1705.46	2547.3	-0.57881	0.00076788	sp|P28346|RODL_EMENI Rodlet protein OS=Emericella nidulans (strain FGSC A4 / ATCC 38163 / CBS 112.46 / NRRL 194 / M139) GN=rodA PE=2 SV=1//7.33865e-13
CADAFLAG00011591	AFLA_098530	104.742	25.6283	2.031	0.0011741	sp|B5BP49|YP55_SCHPO Uncharacterized transporter C460.05 OS=Schizosaccharomyces pombe (strain 972 / ATCC 24843) GN=SPBC460.05 PE=3 SV=1//1.5338e-85
CADAFLAG00011601	AFLA_098630	106.15	271.529	-1.355	8.8359e-05	sp|P53388|DIP5_YEAST Dicarboxylic amino acid permease OS=Saccharomyces cerevisiae (strain ATCC 204508 / S288c) GN=DIP5 PE=1 SV=1//1.70234e-30
CADAFLAG00011602	AFLA_098640	1873.6	5664.95	-1.5962	2.6347e-32	sp|E1U332|ALL12_OLEEU Isoflavone reductase-like protein OS=Olea europaea PE=1 SV=1//1.14525e-23
CADAFLAG00011605	AFLA_098670	2458.94	1261.57	0.96282	2.7615e-11	sp|Q01306|CCG8_NEUCR Clock-controlled protein 8 OS=Neurospora crassa (strain ATCC 24698 / 74-OR23-1A / CBS 708.71 / DSM 1257 / FGSC 987) GN=ccg-8 PE=2 SV=3//2.34583e-35
CADAFLAG00011608	AFLA_098700	9839.24	6463.52	0.60623	5.2132e-07	sp|P0C0Y5|MTDH_DAVTA Probable NADP-dependent mannitol dehydrogenase OS=Davidiella tassiana PE=1 SV=1//1.45914e-23
CADAFLAG00011617	AFLA_098790	185.993	375.993	-1.0155	0.00083793	sp|Q9XFK7|MFT_ARATH Protein MOTHER of FT and TF 1 OS=Arabidopsis thaliana GN=MFT PE=1 SV=1//6.51141e-13
CADAFLAG00011621	AFLA_098830	83.5657	28.3909	1.5575	0.038507	sp|O74829|YN2F_SCHPO Uncharacterized MFS-type transporter C530.15c OS=Schizosaccharomyces pombe (strain 972 / ATCC 24843) GN=SPBC530.15c PE=1 SV=2//2.16997e-63
CADAFLAG00011628	AFLA_098900	80.9722	200.934	-1.3112	0.0014442	sp|Q6NUE2|CBR4_XENLA Carbonyl reductase family member 4 OS=Xenopus laevis GN=cbr4 PE=2 SV=1//7.97775e-12
CADAFLAG00011646	AFLA_099080	4804.11	3325.24	0.53081	0.0018136	-//-
CADAFLAG00011660	AFLA_099220	11330.9	18108.6	-0.67642	3.8133e-08	-//-
CADAFLAG00011679	AFLA_099410	25.5429	1.50475	4.0853	0.039127	sp|Q5ZID0|NMRL1_CHICK NmrA-like family domain-containing protein 1 OS=Gallus gallus GN=NMRAL1 PE=2 SV=1//1.28816e-26
CADAFLAG00011697	AFLA_099590	47.8332	114.798	-1.263	0.028891	-//-
CADAFLAG00011702	AFLA_099650	14056.7	17739.4	-0.33571	0.015448	sp|Q9P8K9|HEX1_EMENI Woronin body major protein OS=Emericella nidulans (strain FGSC A4 / ATCC 38163 / CBS 112.46 / NRRL 194 / M139) GN=hex1 PE=2 SV=1//1.31186e-92
CADAFLAG00011712	AFLA_099750	795.469	1267.24	-0.67182	0.00034826	sp|Q6Q2C2|HYES_PIG Bifunctional epoxide hydrolase 2 OS=Sus scrofa GN=EPHX2 PE=2 SV=1//3.11353e-09
CADAFLAG00011715	AFLA_099780	1180.57	834.715	0.50013	0.013676	sp|Q2U492|BTGC_ASPOR Probable glucan endo-1,3-beta-glucosidase btgC OS=Aspergillus oryzae (strain ATCC 42149 / RIB 40) GN=btgC PE=3 SV=1//2.7231e-23
CADAFLAG00011724	AFLA_099870	210.952	564.197	-1.4193	5.4992e-09	sp|Q6Q2C2|HYES_PIG Bifunctional epoxide hydrolase 2 OS=Sus scrofa GN=EPHX2 PE=2 SV=1//5.34647e-44
CADAFLAG00011727	AFLA_099900	176.44	558.624	-1.6627	2.1961e-11	-//-
CADAFLAG00011736	AFLA_099990	2415.06	3707.37	-0.61834	8.5007e-05	sp|Q9UTJ7|DHSA_SCHPO Probable succinate dehydrogenase [ubiquinone] flavoprotein subunit, mitochondrial OS=Schizosaccharomyces pombe (strain 972 / ATCC 24843) GN=sdh1 PE=2 SV=1//1.37569e-08
CADAFLAG00011746	AFLA_100090	109.091	231.324	-1.0844	0.0056607	-//-
CADAFLAG00011754	AFLA_100170	323.439	546.514	-0.75677	0.0047359	sp|O42636|CIA30_NEUCR Complex I intermediate-associated protein 30, mitochondrial OS=Neurospora crassa (strain ATCC 24698 / 74-OR23-1A / CBS 708.71 / DSM 1257 / FGSC 987) GN=cia30 PE=1 SV=1//3.22246e-15
CADAFLAG00011757	AFLA_100200	337.042	157.273	1.0997	0.00057799	sp|Q9USH7|PSY1_SCHPO Syntaxin-like protein psy1 OS=Schizosaccharomyces pombe (strain 972 / ATCC 24843) GN=psy1 PE=2 SV=1//1.24876e-09
CADAFLAG00011762	AFLA_100250	21.3571	120.841	-2.5003	2.2202e-06	sp|Q5RF10|CATA_PONAB Catalase OS=Pongo abelii GN=CAT PE=2 SV=3//2.10066e-145
CADAFLAG00011763	AFLA_100260	326.328	511.459	-0.6483	0.017313	-//-
CADAFLAG00011796	AFLA_100590	186.185	55.4764	1.7468	0.00010584	sp|Q12664|CP51_PENIT Eburicol 14-alpha-demethylase OS=Penicillium italicum GN=CYP51 PE=3 SV=1//0
CADAFLAG00011797	AFLA_100600	565.754	316.449	0.8382	0.00051559	sp|Q53552|NHG2_PSEPU Salicylate hydroxylase OS=Pseudomonas putida GN=nahG PE=4 SV=1//1.36331e-12
CADAFLAG00011799	AFLA_100620	548.127	260.479	1.0733	1.0582e-05	sp|O94343|YHMA_SCHPO Uncharacterized MFS-type transporter C1271.10c OS=Schizosaccharomyces pombe (strain 972 / ATCC 24843) GN=SPBC1271.10c PE=1 SV=1//4.59693e-21
CADAFLAG00011802	AFLA_100650	1947.81	2960.13	-0.60381	5.3814e-05	sp|P52719|PEPS_ASPSA Carboxypeptidase cpdS OS=Aspergillus saitoi GN=cpdS PE=2 SV=1//3.28531e-18
CADAFLAG00011806	AFLA_100690	468.921	704.575	-0.58741	0.017398	sp|P56859|MET16_EMENI Phosphoadenosine phosphosulfate reductase OS=Emericella nidulans (strain FGSC A4 / ATCC 38163 / CBS 112.46 / NRRL 194 / M139) GN=sA PE=3 SV=3//5.95913e-13
CADAFLAG00011820	AFLA_100830	1339.38	2086.52	-0.63953	0.00010729	sp|O75323|NIPS2_HUMAN Protein NipSnap homolog 2 OS=Homo sapiens GN=GBAS PE=1 SV=1//2.71326e-32
CADAFLAG00011821	AFLA_100840	487.694	763.403	-0.64647	0.0042726	sp|Q9UUK0|PDXH_SCHPO Pyridoxamine 5&apos;-phosphate oxidase C1952.08c homolog OS=Schizosaccharomyces pombe (strain 972 / ATCC 24843) GN=SPAC1952.08c PE=2 SV=1//8.96955e-18
CADAFLAG00011837	AFLA_101000	250.059	427.274	-0.77289	0.0082758	sp|Q12627|DLD1_KLULA D-lactate dehydrogenase [cytochrome], mitochondrial OS=Kluyveromyces lactis (strain ATCC 8585 / CBS 2359 / DSM 70799 / NBRC 1267 / NRRL Y-1140 / WM37) GN=DLD1 PE=3 SV=2//1.31514e-148
CADAFLAG00011849	AFLA_101120	921.353	671.623	0.4561	0.044754	sp|Q40153|LE14B_LITER LEC14B protein OS=Lithospermum erythrorhizon PE=2 SV=1//2.75888e-07
CADAFLAG00011862	AFLA_101250	296.583	1263.45	-2.0909	1.1844e-28	sp|Q92247|BLI4_NEUCR Putative oxidoreductase bli-4, mitochondrial OS=Neurospora crassa (strain ATCC 24698 / 74-OR23-1A / CBS 708.71 / DSM 1257 / FGSC 987) GN=bli-4 PE=1 SV=1//1.91947e-11
CADAFLAG00011864	AFLA_101270	51.7019	141.66	-1.4541	0.0037604	sp|Q7KVA1|XYLT_DROME Xylosyltransferase oxt OS=Drosophila melanogaster GN=oxt PE=2 SV=1//1.45898e-06
CADAFLAG00011882	AFLA_101450	114.29	24.864	2.2006	0.00016468	sp|Q9P6J0|YHDC_SCHPO Uncharacterized transporter C1683.12 OS=Schizosaccharomyces pombe (strain 972 / ATCC 24843) GN=SPBC1683.12 PE=2 SV=1//1.73838e-34
CADAFLAG00011891	AFLA_101540	259.613	31.1536	3.0589	2.8345e-14	-//-
CADAFLAG00011893	AFLA_101560	264.605	149.972	0.81915	0.035814	sp|Q9UT60|YKJ6_SCHPO Uncharacterized oxidoreductase C513.06c OS=Schizosaccharomyces pombe (strain 972 / ATCC 24843) GN=SPAC513.06c PE=2 SV=1//1.53071e-08
CADAFLAG00011895	AFLA_101580	20.3254	167.806	-3.0454	1.3325e-11	-//-
CADAFLAG00011900	AFLA_101630	713.369	198.442	1.8459	8.4327e-17	-//-
CADAFLAG00011921	AFLA_101840	232.974	60.7787	1.9385	3.3142e-07	-//-
CADAFLAG00011930	AFLA_101930	2729.2	3933.06	-0.52717	0.00036709	sp|P38067|UGA2_YEAST Succinate-semialdehyde dehydrogenase [NADP(+)] OS=Saccharomyces cerevisiae (strain ATCC 204508 / S288c) GN=UGA2 PE=1 SV=2//3.40179e-138
CADAFLAG00011935	AFLA_101980	562.443	2600.38	-2.2089	6.9259e-45	sp|Q44471|TTUC1_AGRVI Probable tartrate dehydrogenase/decarboxylase TtuC OS=Agrobacterium vitis GN=ttuC PE=2 SV=1//6.43515e-167
CADAFLAG00011938	AFLA_102010	239.18	709.83	-1.5694	3.2532e-12	-//-
CADAFLAG00011970	AFLA_102340	2785.2	1921.53	0.53553	0.00034953	sp|Q9P6J3|MALT_SCHPO Alpha-glucosidase OS=Schizosaccharomyces pombe (strain 972 / ATCC 24843) GN=mal1 PE=2 SV=1//0
CADAFLAG00011978	AFLA_102420	50.6344	307.667	-2.6032	8.8579e-15	-//-
CADAFLAG00012003	AFLA_102670	284.792	141.931	1.0047	0.0041248	sp|P07921|LACP_KLULA Lactose permease OS=Kluyveromyces lactis (strain ATCC 8585 / CBS 2359 / DSM 70799 / NBRC 1267 / NRRL Y-1140 / WM37) GN=LAC12 PE=3 SV=1//6.68637e-11
CADAFLAG00012061	AFLA_103250	2486.96	3226.76	-0.37571	0.032346	sp|O42897|RPN3_SCHPO Probable 26S proteasome regulatory subunit rpn3 OS=Schizosaccharomyces pombe (strain 972 / ATCC 24843) GN=rpn3 PE=2 SV=2//3.85952e-132
CADAFLAG00012070	AFLA_103340	1954.93	2818.75	-0.52794	0.00084863	-//-
CADAFLAG00012076	AFLA_103400	364.339	553.44	-0.60315	0.022321	-//-
CADAFLAG00012101	AFLA_103660	997.006	1446.57	-0.53696	0.0044521	sp|P43619|NADC_YEAST Nicotinate-nucleotide pyrophosphorylase [carboxylating] OS=Saccharomyces cerevisiae (strain ATCC 204508 / S288c) GN=BNA6 PE=1 SV=1//1.18433e-99
CADAFLAG00012108	AFLA_103730	2301.92	4033.61	-0.80924	3.9781e-09	sp|P31688|TPS2_YEAST Trehalose-phosphatase OS=Saccharomyces cerevisiae (strain ATCC 204508 / S288c) GN=TPS2 PE=1 SV=3//0
CADAFLAG00012109	AFLA_103740	450.784	709.137	-0.65363	0.0052913	sp|Q9UTN3|CID14_SCHPO Poly(A) RNA polymerase cid14 OS=Schizosaccharomyces pombe (strain 972 / ATCC 24843) GN=cid14 PE=1 SV=2//1.15256e-10
CADAFLAG00012114	AFLA_103790	1942.26	1353.77	0.52075	0.0024503	sp|O94614|CHR4_SCHPO Chitin synthase regulatory factor 4 OS=Schizosaccharomyces pombe (strain 972 / ATCC 24843) GN=chr4 PE=1 SV=4//2.66462e-43
CADAFLAG00012134	AFLA_103990	590.963	866.514	-0.55215	0.019212	sp|P23506|PIMT_MOUSE Protein-L-isoaspartate(D-aspartate) O-methyltransferase OS=Mus musculus GN=Pcmt1 PE=1 SV=3//5.38644e-49
CADAFLAG00012136	AFLA_104010	1580.19	2321.94	-0.55523	0.00069427	sp|P19262|ODO2_YEAST Dihydrolipoyllysine-residue succinyltransferase component of 2-oxoglutarate dehydrogenase complex, mitochondrial OS=Saccharomyces cerevisiae (strain ATCC 204508 / S288c) GN=KGD2 PE=1 SV=2//3.4341e-07
CADAFLAG00012138	AFLA_104030	3985.04	6364.16	-0.67538	6.1303e-07	sp|Q6BRG3|H2A2_DEBHA Histone H2A.2 OS=Debaryomyces hansenii (strain ATCC 36239 / CBS 767 / JCM 1990 / NBRC 0083 / IGC 2968) GN=HTA2 PE=3 SV=3//3.61099e-09
CADAFLAG00012139	AFLA_104040	3609.45	5498.66	-0.6073	0.0013738	sp|Q2U5A9|H2B_ASPOR Histone H2B OS=Aspergillus oryzae (strain ATCC 42149 / RIB 40) GN=htb1 PE=3 SV=3//6.46604e-65
CADAFLAG00012158	AFLA_115860	141.139	322.269	-1.1911	0.00019333	sp|P51831|FABG_BACSU 3-oxoacyl-[acyl-carrier-protein] reductase FabG OS=Bacillus subtilis (strain 168) GN=fabG PE=3 SV=3//2.61863e-45
CADAFLAG00012159	AFLA_115870	276.596	1336.68	-2.2728	3.1265e-24	sp|Q8YFD6|Y1586_BRUME Uncharacterized protein BMEI1586 OS=Brucella melitensis biotype 1 (strain 16M / ATCC 23456 / NCTC 10094) GN=BMEI1586 PE=1 SV=1//1.70164e-111
CADAFLAG00012165	AFLA_115930	2910.23	4965.2	-0.77072	1.3689e-08	sp|Q0CRX8|TERL_ASPTN Terrelysin OS=Aspergillus terreus (strain NIH 2624 / FGSC A1156) GN=ATEG_03556 PE=2 SV=2//2.33803e-44
CADAFLAG00012172	AFLA_116000	403.863	655.564	-0.69887	0.0044269	sp|P67773|Y3657_MYCBO Uncharacterized protein Mb3657 OS=Mycobacterium bovis (strain ATCC BAA-935 / AF2122/97) GN=Mb3657 PE=3 SV=1//1.24664e-17
CADAFLAG00012174	AFLA_116020	483.612	1186.43	-1.2947	1.9149e-12	-//-
CADAFLAG00012175	AFLA_116030	75.8227	153.969	-1.0219	0.04614	sp|P49943|XYLB_BACOV Xylosidase/arabinosidase OS=Bacteroides ovatus GN=xsa PE=2 SV=1//1.70389e-19
CADAFLAG00012176	AFLA_116040	338.988	911.87	-1.4276	1.339e-12	sp|Q2TXS4|PELD_ASPOR Pectin lyase 2 OS=Aspergillus oryzae (strain ATCC 42149 / RIB 40) GN=pel2 PE=1 SV=1//0
CADAFLAG00012180	AFLA_116080	147.766	914.927	-2.6303	7.3215e-23	sp|A2R989|BGLI_ASPNC Probable beta-glucosidase I OS=Aspergillus niger (strain CBS 513.88 / FGSC A1513) GN=bglI PE=3 SV=1//3.6391e-42
CADAFLAG00012181	AFLA_116090	44.7095	148.937	-1.7361	0.00033536	sp|P07921|LACP_KLULA Lactose permease OS=Kluyveromyces lactis (strain ATCC 8585 / CBS 2359 / DSM 70799 / NBRC 1267 / NRRL Y-1140 / WM37) GN=LAC12 PE=3 SV=1//2.22141e-44
CADAFLAG00012199	AFLA_116270	323.192	171.827	0.91144	0.0061553	sp|Q15166|PON3_HUMAN Serum paraoxonase/lactonase 3 OS=Homo sapiens GN=PON3 PE=1 SV=3//6.92716e-07
CADAFLAG00012208	AFLA_116360	956.93	2095.07	-1.1305	4.5455e-13	sp|P27643|SP5K_BACSU Stage V sporulation protein K OS=Bacillus subtilis (strain 168) GN=spoVK PE=2 SV=3//1.59531e-17
CADAFLAG00012212	AFLA_116400	1226.13	3261.69	-1.4115	4.8733e-22	sp|P49374|HGT1_KLULA High-affinity glucose transporter OS=Kluyveromyces lactis (strain ATCC 8585 / CBS 2359 / DSM 70799 / NBRC 1267 / NRRL Y-1140 / WM37) GN=HGT1 PE=3 SV=1//1.01529e-122
CADAFLAG00012215	AFLA_116430	311.05	813.625	-1.3872	4.8469e-11	sp|O70199|UGDH_RAT UDP-glucose 6-dehydrogenase OS=Rattus norvegicus GN=Ugdh PE=1 SV=1//1.09532e-12
CADAFLAG00012216	AFLA_116440	16.3169	66.7977	-2.0334	0.011485	sp|Q9I489|Y1255_PSEAE Uncharacterized protein PA1255 OS=Pseudomonas aeruginosa (strain ATCC 15692 / PAO1 / 1C / PRS 101 / LMG 12228) GN=PA1255 PE=1 SV=1//4.22562e-102
CADAFLAG00012223	AFLA_116510	23.1697	82.1395	-1.8258	0.0079459	-//-
CADAFLAG00012239	AFLA_116670	507.267	820.161	-0.69316	0.0014206	sp|B2U092|GARL_SHIB3 5-keto-4-deoxy-D-glucarate aldolase OS=Shigella boydii serotype 18 (strain CDC 3083-94 / BS512) GN=garL PE=3 SV=1//9.34325e-25
CADAFLAG00012271	AFLA_116990	922.32	2176.41	-1.2386	4.9275e-15	sp|P53387|KHT2_KLULC Hexose transporter 2 OS=Kluyveromyces lactis GN=KHT2 PE=3 SV=1//1.70774e-138
CADAFLAG00012276	AFLA_117040	63.1255	161.54	-1.3556	0.0027582	sp|Q2TXI3|FM522_ASPOR Protein fmp52-2, mitochondrial OS=Aspergillus oryzae (strain ATCC 42149 / RIB 40) GN=fmp522 PE=3 SV=1//1.03418e-07
CADAFLAG00012326	AFLA_117540	38114.8	25960.7	0.55402	6.9844e-07	-//-
CADAFLAG00012327	AFLA_117550	47366.7	30581.1	0.63123	3.0386e-05	sp|P32586|PYP2_SCHPO Tyrosine-protein phosphatase 2 OS=Schizosaccharomyces pombe (strain 972 / ATCC 24843) GN=pyp2 PE=1 SV=1//8.14293e-07
CADAFLAG00012334	AFLA_117620	815.689	516.738	0.65859	0.0032082	-//-
CADAFLAG00012336	AFLA_117640	3320.41	1828.64	0.86059	1.4302e-10	-//-
CADAFLAG00012348	AFLA_117760	355.213	922.826	-1.3774	1.1892e-11	sp|Q9C1T1|PHYA_ASPOR 3-phytase A OS=Aspergillus oryzae (strain ATCC 42149 / RIB 40) GN=phyA PE=2 SV=1//1.09839e-29
CADAFLAG00012354	AFLA_117820	788.674	524.779	0.58772	0.012318	sp|P08657|LAC9_KLULA Lactose regulatory protein LAC9 OS=Kluyveromyces lactis (strain ATCC 8585 / CBS 2359 / DSM 70799 / NBRC 1267 / NRRL Y-1140 / WM37) GN=LAC9 PE=1 SV=1//1.78902e-11
CADAFLAG00012355	AFLA_117830	431.492	721.868	-0.7424	0.0015691	sp|B8NW36|MANBB_ASPFN Probable beta-mannosidase B OS=Aspergillus flavus (strain ATCC 200026 / FGSC A1120 / NRRL 3357 / JCM 12722 / SRRC 167) GN=mndB PE=3 SV=1//0
CADAFLAG00012369	AFLA_117970	6198.17	10526.9	-0.76417	7.9697e-10	sp|Q9UW81|NOP1_NEUCR Opsin-1 OS=Neurospora crassa (strain ATCC 24698 / 74-OR23-1A / CBS 708.71 / DSM 1257 / FGSC 987) GN=nop-1 PE=1 SV=1//3.25041e-24
CADAFLAG00012377	AFLA_118050	4551.14	2845.63	0.67748	1.8935e-07	sp|P32901|PTR2_YEAST Peptide transporter PTR2 OS=Saccharomyces cerevisiae (strain ATCC 204508 / S288c) GN=PTR2 PE=1 SV=2//2.22773e-180
CADAFLAG00012379	AFLA_118070	218.516	88.9465	1.2967	0.001411	sp|Q7M9S1|TRPB1_WOLSU Tryptophan synthase beta chain 1 OS=Wolinella succinogenes (strain ATCC 29543 / DSM 1740 / LMG 7466 / NCTC 11488 / FDC 602W) GN=trpB1 PE=3 SV=1//2.94159e-159
CADAFLAG00012396	AFLA_118240	301.794	138.38	1.1249	0.00054337	sp|Q7TNE1|CG010_MOUSE CaiB/baiF CoA-transferase family protein C7orf10 homolog OS=Mus musculus PE=2 SV=2//4.21429e-11
CADAFLAG00012398	AFLA_118260	189.341	607.611	-1.6822	1.7029e-12	-//-
CADAFLAG00012404	AFLA_118320	167.803	83.6443	1.0044	0.040459	-//-
CADAFLAG00012406	AFLA_118340	177.872	458.18	-1.3651	2.9748e-07	sp|O64411|PAO_MAIZE Polyamine oxidase OS=Zea mays GN=PAO PE=1 SV=1//9.18269e-94
CADAFLAG00012414	AFLA_118420	99.5172	23.1124	2.1063	0.0010757	-//-
CADAFLAG00012417	AFLA_118450	149.15	371.726	-1.3175	1.0374e-05	-//-
CADAFLAG00012418	AFLA_118460	378.322	223.33	0.76044	0.017666	sp|O59700|YN43_SCHPO Uncharacterized transporter C36.03c OS=Schizosaccharomyces pombe (strain 972 / ATCC 24843) GN=SPBC36.03c PE=2 SV=1//5.39556e-91
CADAFLAG00012421	AFLA_118490	4767.88	1860.09	1.358	6.95e-22	-//-
CADAFLAG00012422	AFLA_118500	4965.44	16122.2	-1.6991	1.5816e-25	-//-
CADAFLAG00012423	AFLA_118510	4950.73	2165.52	1.1929	3.059e-22	-//-
CADAFLAG00012428	AFLA_118560	21.1977	71.3357	-1.7507	0.019975	-//-
CADAFLAG00012429	AFLA_118570	632.035	947.196	-0.58366	0.0074217	-//-
CADAFLAG00012430	AFLA_118580	289.227	834.15	-1.5281	5.3997e-13	-//-
CADAFLAG00012431	AFLA_118590	13.6984	69.8309	-2.3499	0.0013368	sp|Q6P093|ADCL2_HUMAN Arylacetamide deacetylase-like 2 OS=Homo sapiens GN=AADACL2 PE=2 SV=3//2.4597e-10
CADAFLAG00012457	AFLA_118850	48.5586	152.735	-1.6532	0.00034937	sp|A6TEE9|GARL_KLEP7 5-keto-4-deoxy-D-glucarate aldolase OS=Klebsiella pneumoniae subsp. pneumoniae (strain ATCC 700721 / MGH 78578) GN=garL PE=3 SV=1//9.86553e-24
CADAFLAG00012459	AFLA_118870	98.43	271.211	-1.4622	0.029543	sp|Q9UR06|MMF2_SCHPO Protein mmf2, mitochondrial OS=Schizosaccharomyces pombe (strain 972 / ATCC 24843) GN=mmf2 PE=2 SV=1//1.71284e-18
CADAFLAG00012460	AFLA_118880	31.7311	183.888	-2.5349	2.7566e-09	sp|Q7LL04|YQK1_SCHPO UPF0676 protein C1494.01 OS=Schizosaccharomyces pombe (strain 972 / ATCC 24843) GN=SPCC1494.01 PE=3 SV=2//8.78807e-14
CADAFLAG00012471	AFLA_118990	131.846	13.5665	3.2807	3.3104e-08	sp|Q00357|TOXA_COCCA Putative HC-toxin efflux carrier TOXA OS=Cochliobolus carbonum GN=TOXA PE=3 SV=1//8.29479e-79
CADAFLAG00012476	AFLA_119040	238.154	501.078	-1.0731	4.4344e-05	-//-
CADAFLAG00012497	AFLA_119250	355.87	197.702	0.84803	0.0079459	sp|P53091|MCM6_YEAST DNA replication licensing factor MCM6 OS=Saccharomyces cerevisiae (strain ATCC 204508 / S288c) GN=MCM6 PE=1 SV=2//4.56286e-12
CADAFLAG00012501	AFLA_119290	767.457	1336.9	-0.80073	7.0455e-06	sp|Q9HGZ0|K6PF2_ASPOR 6-phosphofructokinase subunit beta OS=Aspergillus oryzae (strain ATCC 42149 / RIB 40) GN=pfkB PE=2 SV=1//7.26058e-06
CADAFLAG00012525	AFLA_119530	77.3612	443.532	-2.5194	5.3908e-13	sp|P39932|STL1_YEAST Sugar transporter STL1 OS=Saccharomyces cerevisiae (strain ATCC 204508 / S288c) GN=STL1 PE=1 SV=2//4.14033e-141
CADAFLAG00012533	AFLA_119610	762.494	1130.05	-0.56759	0.0055915	sp|Q9C1W4|PMP3_SCHPO Plasma membrane proteolipid 3 OS=Schizosaccharomyces pombe (strain 972 / ATCC 24843) GN=pmp3 PE=2 SV=2//8.72383e-08
CADAFLAG00012539	AFLA_119670	1783.85	2600.08	-0.54356	0.00089474	sp|Q96VA4|GLGB_ASPOR 1,4-alpha-glucan-branching enzyme OS=Aspergillus oryzae (strain ATCC 42149 / RIB 40) GN=gbeA PE=2 SV=1//5.66087e-15
CADAFLAG00012544	AFLA_119720	521.246	1193.59	-1.1953	1.2629e-10	sp|P15325|QUTD_EMENI Quinate permease OS=Emericella nidulans (strain FGSC A4 / ATCC 38163 / CBS 112.46 / NRRL 194 / M139) GN=qutD PE=1 SV=2//1.57897e-100
CADAFLAG00012549	AFLA_119770	791.207	355.421	1.1545	2.2971e-08	-//-
CADAFLAG00012550	AFLA_119780	11303.4	4033.76	1.4866	2.1531e-41	sp|B8NWE1|NPIIB_ASPFN Neutral protease 2 homolog AFLA_119780 OS=Aspergillus flavus (strain ATCC 200026 / FGSC A1120 / NRRL 3357 / JCM 12722 / SRRC 167) GN=AFLA_119780 PE=3 SV=1//0
CADAFLAG00012556	AFLA_119840	6.1811	120.323	-4.2829	2.0557e-14	-//-
CADAFLAG00012558	AFLA_119860	45.7161	219.509	-2.2635	7.9223e-09	sp|Q2TWM1|PELB_ASPOR Pectin lyase 1 OS=Aspergillus oryzae (strain ATCC 42149 / RIB 40) GN=pel1 PE=2 SV=1//2.48098e-80
CADAFLAG00012559	AFLA_119870	1790.55	2565.79	-0.519	0.0014662	sp|O42772|DHSB_MYCGR Succinate dehydrogenase [ubiquinone] iron-sulfur subunit, mitochondrial OS=Mycosphaerella graminicola GN=SDH2 PE=3 SV=1//2.69318e-158
CADAFLAG00012567	AFLA_119950	57.8401	337.833	-2.5462	1.1247e-15	sp|P0CJ44|ALF_COCIM Putative fructose-bisphosphate aldolase OS=Coccidioides immitis (strain RS) GN=CIMG_05755 PE=1 SV=1//2.559e-152
CADAFLAG00012568	AFLA_119960	152.947	507.391	-1.7301	2.4156e-11	sp|Q46888|YGBJ_ECOLI Uncharacterized oxidoreductase YgbJ OS=Escherichia coli (strain K12) GN=ygbJ PE=3 SV=1//1.43863e-17
CADAFLAG00012571	AFLA_119990	121.338	251.697	-1.0527	0.0042206	sp|O94562|YGD3_SCHPO Uncharacterized aminotransferase C1771.03c OS=Schizosaccharomyces pombe (strain 972 / ATCC 24843) GN=SPBC1773.03c PE=2 SV=1//5.67942e-144
CADAFLAG00012577	AFLA_120050	37.4466	101.996	-1.4456	0.014895	-//-
CADAFLAG00012592	AFLA_120200	83.2432	30.6362	1.4421	0.047383	-//-
CADAFLAG00012594	AFLA_120220	485.202	1030.9	-1.0872	0.035655	-//-
CADAFLAG00012611	AFLA_120390	38.034	335.318	-3.1402	8.1097e-22	-//-
CADAFLAG00012612	AFLA_120400	269.511	97.9275	1.4606	1.538e-05	-//-
CADAFLAG00012613	AFLA_120410	74.5475	164.526	-1.1421	0.015282	-//-
CADAFLAG00012615	AFLA_120430	13.8632	92.6728	-2.7409	1.1611e-05	sp|Q9P768|YI26_SCHPO Uncharacterized amino-acid permease P7G5.06 OS=Schizosaccharomyces pombe (strain 972 / ATCC 24843) GN=SPAP7G5.06 PE=2 SV=1//7.85303e-134
CADAFLAG00012635	AFLA_120630	323.177	2165.25	-2.7441	1.0615e-61	sp|Q03134|FDH_EMENI Probable formate dehydrogenase OS=Emericella nidulans (strain FGSC A4 / ATCC 38163 / CBS 112.46 / NRRL 194 / M139) GN=aciA PE=2 SV=3//1.7059e-23
CADAFLAG00012647	AFLA_120750	111.441	18.5982	2.583	3.4533e-05	-//-
CADAFLAG00012651	AFLA_120790	151.092	66.0572	1.1936	0.016546	sp|P40445|YIQ6_YEAST Uncharacterized transporter YIL166C OS=Saccharomyces cerevisiae (strain ATCC 204508 / S288c) GN=YIL166C PE=1 SV=1//5.60092e-10
CADAFLAG00012677	AFLA_121050	434.713	155.72	1.4811	4.1024e-08	sp|Q8LG53|UN932_ARATH UNC93-like protein 2 OS=Arabidopsis thaliana GN=At1g18010 PE=2 SV=2//1.79723e-33
CADAFLAG00012678	AFLA_121060	1433.88	674.21	1.0887	6.8831e-11	sp|Q9LIG0|Y3136_ARATH Clavaminate synthase-like protein At3g21360 OS=Arabidopsis thaliana GN=At3g21360 PE=1 SV=1//6.08816e-32
CADAFLAG00012681	AFLA_121090	208.929	940.812	-2.1709	2.2097e-10	-//-
CADAFLAG00012682	AFLA_121100	17.5188	156.508	-3.1593	1.495e-11	-//-
CADAFLAG00012685	AFLA_121130	78.7028	20.3498	1.9514	0.010065	-//-
CADAFLAG00012697	AFLA_121250	221.271	73.3579	1.5928	4.9212e-05	sp|Q5UQ35|YR811_MIMIV Putative ariadne-like RING finger protein R811 OS=Acanthamoeba polyphaga mimivirus GN=MIMI_R811 PE=4 SV=1//6.19524e-81
CADAFLAG00012698	AFLA_121260	168.041	36.6552	2.1967	1.565e-06	sp|Q4WFS2|Y1220_ASPFU Probable aspartic-type endopeptidase AFUA_3G01220 OS=Neosartorya fumigata (strain ATCC MYA-4609 / Af293 / CBS 101355 / FGSC A1100) GN=AFUA_3G01220 PE=3 SV=2//2.27306e-66
CADAFLAG00012702	AFLA_121300	301.935	69.8309	2.1123	4.5043e-10	sp|P40113|RTM1_YEASX Protein RTM1 OS=Saccharomyces cerevisiae GN=RTM1 PE=3 SV=1//4.25569e-49
CADAFLAG00012705	AFLA_121330	1437.79	797.837	0.84969	6.4482e-07	-//-
CADAFLAG00012709	AFLA_121370	71.3378	148.444	-1.0572	0.041904	sp|P0C956|GEL4_ASPFU 1,3-beta-glucanosyltransferase gel4 OS=Neosartorya fumigata (strain ATCC MYA-4609 / Af293 / CBS 101355 / FGSC A1100) GN=gel4 PE=3 SV=1//2.7019e-176
CADAFLAG00012717	AFLA_121450	197.612	80.1174	1.3025	0.0015791	sp|P17296|MPC2_CUPNE Metapyrocatechase 2 OS=Cupriavidus necator GN=mcpII PE=3 SV=1//1.29398e-14
CADAFLAG00012728	AFLA_121560	285.604	136.676	1.0633	0.002641	sp|A4JPY1|MHPA1_BURVG 3-(3-hydroxy-phenyl)propionate/3-hydroxycinnamic acid hydroxylase 1 OS=Burkholderia vietnamiensis (strain G4 / LMG 22486) GN=mhpA1 PE=3 SV=1//2.66807e-11
CADAFLAG00012730	AFLA_121580	160.096	57.0049	1.4898	0.001278	sp|Q9UUH4|MSMO_SCHPO Methylsterol monooxygenase OS=Schizosaccharomyces pombe (strain 972 / ATCC 24843) GN=erg25 PE=2 SV=1//7.47486e-100
CADAFLAG00012739	AFLA_121670	20.7105	64.0588	-1.629	0.049125	-//-
CADAFLAG00012744	AFLA_121720	351.828	192.718	0.86838	0.010898	-//-
CADAFLAG00012745	AFLA_121730	380.835	1292.65	-1.7631	5.2769e-22	sp|Q2TW69|AGALC_ASPOR Probable alpha-galactosidase C OS=Aspergillus oryzae (strain ATCC 42149 / RIB 40) GN=aglC PE=3 SV=1//2.32735e-99
CADAFLAG00012768	AFLA_121960	994.79	667.379	0.57589	0.0049948	sp|Q9X1E3|GLPF_THEMA Probable glycerol uptake facilitator protein OS=Thermotoga maritima (strain ATCC 43589 / MSB8 / DSM 3109 / JCM 10099) GN=glpF PE=3 SV=1//1.56578e-24
CADAFLAG00012769	AFLA_121970	325.252	2390.22	-2.8775	7.4985e-70	sp|Q2TW49|PLYE_ASPOR Probable pectate lyase E OS=Aspergillus oryzae (strain ATCC 42149 / RIB 40) GN=plyE PE=3 SV=1//1.08438e-176
CADAFLAG00012774	AFLA_122020	2371.46	1701.96	0.47858	0.0043318	sp|Q7LL04|YQK1_SCHPO UPF0676 protein C1494.01 OS=Schizosaccharomyces pombe (strain 972 / ATCC 24843) GN=SPCC1494.01 PE=3 SV=2//4.61175e-20
CADAFLAG00012796	AFLA_122240	99.9381	305.621	-1.6126	0.0066967	-//-
CADAFLAG00012797	AFLA_122250	108.731	249.181	-1.1964	0.0010091	sp|Q12645|PID9_FUSSO Pisatin demethylase OS=Fusarium solani subsp. pisi GN=PDAT9 PE=3 SV=1//7.44747e-09
CADAFLAG00012807	AFLA_122360	85.1472	20.3498	2.0649	0.003912	-//-
CADAFLAG00012808	AFLA_122370	2608.82	215.536	3.5974	8.2844e-110	sp|Q9P380|PTR2_SCHPO Probable peptide transporter ptr2 OS=Schizosaccharomyces pombe (strain 972 / ATCC 24843) GN=ptr2 PE=1 SV=1//5.40255e-118
CADAFLAG00012810	AFLA_122390	97.6741	13.5665	2.8479	2.9386e-05	sp|P32948|LIP4_CANRU Lipase 4 OS=Candida rugosa GN=LIP4 PE=3 SV=1//1.60262e-146
CADAFLAG00012811	AFLA_122400	527.777	240.376	1.1346	4.1529e-06	sp|P36914|AMYG_ASPOR Glucoamylase OS=Aspergillus oryzae (strain ATCC 42149 / RIB 40) GN=glaA PE=2 SV=2//0
CADAFLAG00012814	AFLA_122430	42.3237	130.363	-1.623	0.0018306	sp|A0R665|ETHA_MYCS2 FAD-containing monooxygenase EthA OS=Mycobacterium smegmatis (strain ATCC 700084 / mc(2)155) GN=ethA PE=3 SV=1//9.46019e-56
CADAFLAG00012816	AFLA_122450	24.5058	172.79	-2.8178	4.0031e-10	sp|Q4JK73|DHB11_MACFA Estradiol 17-beta-dehydrogenase 11 OS=Macaca fascicularis GN=HSD17B11 PE=2 SV=1//8.48029e-25
CADAFLAG00012829	AFLA_122580	915.405	371.574	1.3008	5.4763e-11	sp|Q9UTC4|YIDF_SCHPO Uncharacterized protein C227.15 OS=Schizosaccharomyces pombe (strain 972 / ATCC 24843) GN=SPAC227.15 PE=2 SV=1//1.56757e-18
CADAFLAG00012857	AFLA_007460	1026.68	648.605	0.66257	0.00097775	sp|Q9VLZ7|C4D21_DROME Probable cytochrome P450 4d21 OS=Drosophila melanogaster GN=Cyp4d21 PE=3 SV=1//8.82146e-13
CADAFLAG00012859	AFLA_007480	72.2835	166.524	-1.204	0.010071	-//-
CADAFLAG00012860	AFLA_007490	26.6229	121.358	-2.1885	0.0026332	sp|P07046|3SHD_NEUCR 3-dehydroshikimate dehydratase OS=Neurospora crassa (strain ATCC 24698 / 74-OR23-1A / CBS 708.71 / DSM 1257 / FGSC 987) GN=qa-4 PE=4 SV=1//3.83041e-72
CADAFLAG00012865	AFLA_007540	878.073	516.396	0.76586	0.00014792	-//-
CADAFLAG00012869	AFLA_007580	780.569	158.531	2.2998	5.955e-25	sp|Q8GXR2|PLT6_ARATH Probable polyol transporter 6 OS=Arabidopsis thaliana GN=PLT6 PE=2 SV=2//7.62782e-51
CADAFLAG00012871	AFLA_007600	1752.2	672.187	1.3822	8.8081e-19	sp|Q9SUA4|OPT5_ARATH Oligopeptide transporter 5 OS=Arabidopsis thaliana GN=OPT5 PE=2 SV=1//1.31953e-89
CADAFLAG00012874	AFLA_007630	31.2547	190.377	-2.6067	9.0079e-10	sp|Q4WDZ0|SYM1_ASPFU Protein sym1 OS=Neosartorya fumigata (strain ATCC MYA-4609 / Af293 / CBS 101355 / FGSC A1100) GN=sym1 PE=3 SV=1//7.25111e-87
CADAFLAG00012875	AFLA_007640	4102.05	7993.85	-0.96255	2.6998e-14	-//-
CADAFLAG00012881	AFLA_007700	1721.75	604.777	1.5094	3.7351e-22	-//-
CADAFLAG00012883	AFLA_007720	64.7107	514.293	-2.9905	1.6725e-07	sp|A1DEH0|PELF_NEOFI Probable pectin lyase F OS=Neosartorya fischeri (strain ATCC 1020 / DSM 3700 / FGSC A1164 / NRRL 181) GN=pelF PE=3 SV=1//2.20121e-06
CADAFLAG00012887	AFLA_007760	11818.2	24221.4	-1.0353	2.3057e-18	sp|P36366|FMO2_CAVPO Dimethylaniline monooxygenase [N-oxide-forming] 2 OS=Cavia porcellus GN=FMO2 PE=2 SV=2//5.61517e-14
CADAFLAG00012888	AFLA_007770	317.634	482.328	-0.60265	0.035655	sp|Q4WJX0|CSN12_ASPFU Protein CSN12 homolog OS=Neosartorya fumigata (strain ATCC MYA-4609 / Af293 / CBS 101355 / FGSC A1100) GN=csn12 PE=3 SV=1//4.73981e-25
CADAFLAG00012892	AFLA_007810	75.4681	208.952	-1.4692	0.00027773	sp|Q39111|GAOX2_ARATH Gibberellin 20 oxidase 2 OS=Arabidopsis thaliana GN=20ox2 PE=2 SV=1//3.82805e-15
CADAFLAG00012908	AFLA_007970	1749.32	250.368	2.8047	1.2571e-61	sp|Q9PKF7|FABG_CHLMU 3-oxoacyl-[acyl-carrier-protein] reductase FabG OS=Chlamydia muridarum (strain MoPn / Nigg) GN=fabG PE=3 SV=1//4.71871e-16
CADAFLAG00012922	AFLA_008110	124.566	672.012	-2.4316	2.6668e-16	sp|B8NXJ2|XYNF3_ASPFN Probable endo-1,4-beta-xylanase F3 OS=Aspergillus flavus (strain ATCC 200026 / FGSC A1120 / NRRL 3357 / JCM 12722 / SRRC 167) GN=xynF3 PE=2 SV=1//3.91085e-10
CADAFLAG00012929	AFLA_008180	223.974	431.788	-0.94699	0.00080026	sp|O75003|TREPH_GRIFR Trehalose phosphorylase OS=Grifola frondosa PE=1 SV=1//2.05489e-06
CADAFLAG00012930	AFLA_008190	1316.95	3809.17	-1.5323	5.5744e-18	-//-
CADAFLAG00012948	AFLA_008370	189.893	95.7298	0.98814	0.037077	sp|O13780|YEO2_SCHPO Uncharacterized protein C17G6.02c OS=Schizosaccharomyces pombe (strain 972 / ATCC 24843) GN=SPAC17G6.02c PE=2 SV=1//6.31929e-26
CADAFLAG00012950	AFLA_008390	1191.45	787.797	0.59682	0.0023289	-//-
CADAFLAG00012959	AFLA_008480	695.001	3770	-2.4395	1.2579e-62	sp|Q4WLB9|YA090_ASPFU Uncharacterized protein AFUA_6G14090 OS=Neosartorya fumigata (strain ATCC MYA-4609 / Af293 / CBS 101355 / FGSC A1100) GN=AFUA_6G14090 PE=1 SV=1//7.07528e-19
CADAFLAG00012960	AFLA_008490	1044.16	1977.26	-0.92116	5.5597e-09	sp|Q12289|CRC1_YEAST Mitochondrial carnitine carrier OS=Saccharomyces cerevisiae (strain ATCC 204508 / S288c) GN=CRC1 PE=1 SV=1//5.0997e-40
CADAFLAG00012963	AFLA_008520	136.331	280.582	-1.0413	0.0027873	sp|Q9K8U9|O16G_BACHD Oligo-1,6-glucosidase OS=Bacillus halodurans (strain ATCC BAA-125 / DSM 18197 / FERM 7344 / JCM 9153 / C-125) GN=malL PE=3 SV=1//7.63962e-06
CADAFLAG00012973	AFLA_008630	300.753	1005.81	-1.7417	0.0001148	-//-
CADAFLAG00012979	AFLA_008690	33.2859	262.923	-2.9817	4.7555e-05	-//-
CADAFLAG00012992	AFLA_008820	158.536	360.476	-1.1851	7.0877e-05	-//-
CADAFLAG00013009	AFLA_008990	3219.46	4450.71	-0.46722	0.0017056	sp|B8NXS9|CBPYA_ASPFN Carboxypeptidase Y homolog A OS=Aspergillus flavus (strain ATCC 200026 / FGSC A1120 / NRRL 3357 / JCM 12722 / SRRC 167) GN=cpyA PE=3 SV=1//0
CADAFLAG00013014	AFLA_009040	141.823	408.134	-1.525	1.0726e-07	sp|P87257|LEU3B_ASPNG 3-isopropylmalate dehydrogenase B OS=Aspergillus niger GN=leu2B PE=2 SV=1//2.60389e-26
CADAFLAG00013016	AFLA_009060	184.693	369.751	-1.0014	0.00086061	sp|O60206|XLNA_AGABI Endo-1,4-beta-xylanase OS=Agaricus bisporus GN=xlnA PE=2 SV=1//5.3126e-88
CADAFLAG00013021	AFLA_009110	1849.29	2863.2	-0.63065	3.9225e-05	sp|P53694|RTN1_SCHPO Reticulon-like protein 1 OS=Schizosaccharomyces pombe (strain 972 / ATCC 24843) GN=rtn1 PE=1 SV=1//1.96541e-09
CADAFLAG00013027	AFLA_009170	975.633	476.19	1.0348	3.6519e-08	sp|Q0C8L9|HMDH_ASPTN 3-hydroxy-3-methylglutaryl-coenzyme A reductase OS=Aspergillus terreus (strain NIH 2624 / FGSC A1156) GN=ATEG_09965 PE=3 SV=1//3.36173e-19
CADAFLAG00013056	AFLA_009460	162.679	1556.12	-3.2579	3.9096e-17	-//-
CADAFLAG00013084	AFLA_009740	180.916	302.635	-0.74226	0.048373	-//-
CADAFLAG00013088	AFLA_009780	51.908	4.02059	3.6905	0.00099289	-//-
CADAFLAG00013092	AFLA_009820	92.5355	7.27692	3.6686	9.3153e-07	sp|Q8P8Y5|Y2094_XANCP Uncharacterized protein XCC2094 OS=Xanthomonas campestris pv. campestris (strain ATCC 33913 / NCPPB 528 / LMG 568) GN=XCC2094 PE=3 SV=1//1.06811e-43
CADAFLAG00013096	AFLA_009860	88.955	10.5332	3.0781	1.2904e-05	sp|Q9US44|YIZG_SCHPO Uncharacterized transporter C1002.16c OS=Schizosaccharomyces pombe (strain 972 / ATCC 24843) GN=SPAC1002.16c PE=2 SV=1//2.65661e-41
CADAFLAG00013157	AFLA_010470	278.871	1173.37	-2.073	3.1518e-09	sp|A0QCH0|Y1364_MYCA1 Putative O-methyltransferase MAV_1364 OS=Mycobacterium avium (strain 104) GN=MAV_1364 PE=3 SV=1//5.38001e-19
CADAFLAG00013178	AFLA_010680	25.1166	221.037	-3.1376	4.1545e-15	sp|P40896|YJV3_YEAST Uncharacterized protein YJL213W OS=Saccharomyces cerevisiae (strain ATCC 204508 / S288c) GN=YJL213W PE=2 SV=1//2.60429e-41
CADAFLAG00013179	AFLA_010690	92.1451	507.415	-2.4612	1.0286e-20	sp|O74923|YJ7D_SCHPO Uncharacterized transporter C757.13 OS=Schizosaccharomyces pombe (strain 972 / ATCC 24843) GN=SPCC757.13 PE=2 SV=1//6.97723e-97
CADAFLAG00013180	AFLA_010700	61.3255	151.206	-1.302	0.008114	-//-
CADAFLAG00013182	AFLA_010720	12.527	97.2108	-2.9561	9.3153e-07	-//-
CADAFLAG00013197	AFLA_010870	20.0388	96.4465	-2.2669	0.00022611	sp|Q9HFA4|XYNA_ASPOR Endo-1,4-beta-xylanase A OS=Aspergillus oryzae (strain ATCC 42149 / RIB 40) GN=xlnA PE=1 SV=1//1.51148e-29
CADAFLAG00013205	AFLA_010950	1168.27	420.737	1.4734	1.7469e-16	sp|Q12645|PID9_FUSSO Pisatin demethylase OS=Fusarium solani subsp. pisi GN=PDAT9 PE=3 SV=1//6.17258e-07
CADAFLAG00013206	AFLA_010960	197.331	66.5508	1.5681	0.00012401	-//-
CADAFLAG00013214	AFLA_011040	53.5325	5.52533	3.2763	0.0016807	-//-
CADAFLAG00013215	AFLA_011050	28.5143	1.25792	4.5026	0.02094	-//-
CADAFLAG00013227	AFLA_011170	64.2343	14.5776	2.1396	0.01721	-//-
CADAFLAG00013230	AFLA_011200	150.15	13.8133	3.4423	7.3606e-10	sp|P37610|TAUD_ECOLI Alpha-ketoglutarate-dependent taurine dioxygenase OS=Escherichia coli (strain K12) GN=tauD PE=1 SV=3//3.68174e-37
CADAFLAG00013234	AFLA_011240	120.849	492.201	-2.026	0.0023456	-//-
CADAFLAG00013235	AFLA_011250	178.209	345.628	-0.95565	0.0025862	sp|Q7X3T2|AHLL_ARTSP N-acyl homoserine lactonase OS=Arthrobacter sp. GN=ahlD PE=1 SV=1//4.34098e-10
CADAFLAG00013237	AFLA_011270	672.267	1433.5	-1.0924	4.6579e-10	sp|P47734|FADH_METMR S-(hydroxymethyl)glutathione dehydrogenase OS=Methylobacter marinus GN=fdh PE=3 SV=2//1.1961e-32
CADAFLAG00013238	AFLA_011280	527.501	1036.05	-0.97385	9.2523e-07	sp|P51174|ACADL_MOUSE Long-chain specific acyl-CoA dehydrogenase, mitochondrial OS=Mus musculus GN=Acadl PE=2 SV=2//1.36111e-42
CADAFLAG00013240	AFLA_011300	1777.27	788.689	1.1721	3.3371e-14	-//-
CADAFLAG00013243	AFLA_011330	42.5064	139.638	-1.7159	0.00068099	sp|B5BP49|YP55_SCHPO Uncharacterized transporter C460.05 OS=Schizosaccharomyces pombe (strain 972 / ATCC 24843) GN=SPBC460.05 PE=3 SV=1//3.59729e-66
CADAFLAG00013256	AFLA_011460	906.58	379.791	1.2552	1.4112e-10	sp|Q66D54|BETA_YERPS Choline dehydrogenase OS=Yersinia pseudotuberculosis serotype I (strain IP32953) GN=betA PE=3 SV=1//2.4165e-20
CADAFLAG00013257	AFLA_011470	218.341	48.7169	2.1641	5.3282e-08	-//-
CADAFLAG00013263	AFLA_011530	281.581	35.1742	3.001	5.053e-15	-//-
CADAFLAG00013266	AFLA_011560	1145.54	772.479	0.56846	0.0050239	sp|Q9RGS8|PHLN_BURPS Non-hemolytic phospholipase C OS=Burkholderia pseudomallei (strain K96243) GN=plcN PE=1 SV=2//5.65868e-23
CADAFLAG00013275	AFLA_011650	480.393	914.562	-0.92886	5.0899e-06	-//-
CADAFLAG00013280	AFLA_011700	1120.3	1523.01	-0.44304	0.020984	-//-
CADAFLAG00013316	AFLA_012060	176.456	666.145	-1.9165	1.5047e-16	sp|Q7X2H8|CHOX_ARTGO Choline oxidase OS=Arthrobacter globiformis GN=codA PE=1 SV=1//1.23509e-102
CADAFLAG00013321	AFLA_012110	401.56	791.993	-0.97987	4.9943e-06	sp|Q2TZ19|CFT1_ASPOR Protein cft1 OS=Aspergillus oryzae (strain ATCC 42149 / RIB 40) GN=cft1 PE=3 SV=1//6.25129e-22
CADAFLAG00013330	AFLA_012200	4706.79	3668.6	0.35951	0.019224	sp|P87222|HSP75_CANAW Heat shock protein SSB1 OS=Candida albicans (strain WO-1) GN=SSB1 PE=1 SV=2//1.62593e-15
CADAFLAG00013362	AFLA_114440	444.406	660.667	-0.57204	0.021389	sp|O43003|MMF1_SCHPO Protein mmf1, mitochondrial OS=Schizosaccharomyces pombe (strain 972 / ATCC 24843) GN=mmf1 PE=2 SV=1//1.78544e-34
CADAFLAG00013364	AFLA_114460	649.344	1104.47	-0.7663	7.3054e-05	-//-
CADAFLAG00013390	AFLA_114720	764.345	501.937	0.60672	0.010585	sp|P40996|SCD2_SCHPO Protein scd2/ral3 OS=Schizosaccharomyces pombe (strain 972 / ATCC 24843) GN=scd2 PE=1 SV=1//2.48477e-22
CADAFLAG00013393	AFLA_114750	94.4949	187.391	-0.98775	0.026357	sp|O59805|YJV7_SCHPO Putative amidase C550.07 OS=Schizosaccharomyces pombe (strain 972 / ATCC 24843) GN=SPCC550.07 PE=2 SV=1//7.84957e-128
CADAFLAG00013394	AFLA_114760	284.536	564.372	-0.98804	8.437e-05	sp|P30584|CHSA_EMENI Chitin synthase A OS=Emericella nidulans (strain FGSC A4 / ATCC 38163 / CBS 112.46 / NRRL 194 / M139) GN=chsA PE=3 SV=2//2.9207e-25
CADAFLAG00013396	AFLA_114780	1369.25	2400.8	-0.81013	1.6803e-07	-//-
CADAFLAG00013400	AFLA_114820	152.491	62.5778	1.285	0.048368	sp|P22367|MSAS_PENPA 6-methylsalicylic acid synthase OS=Penicillium patulum PE=1 SV=1//3.32254e-87
CADAFLAG00013401	AFLA_114830	1311.31	2224.88	-0.76272	1.8353e-06	sp|Q2PIT3|LAP1_ASPOR Leucine aminopeptidase 1 OS=Aspergillus oryzae (strain ATCC 42149 / RIB 40) GN=lap1 PE=3 SV=1//1.66748e-26
CADAFLAG00013414	AFLA_114960	848.722	441.358	0.94334	3.8004e-06	-//-
CADAFLAG00013418	AFLA_115000	136.953	240.4	-0.81175	0.042565	-//-
CADAFLAG00013422	AFLA_115040	749.044	1220.7	-0.70459	0.00023912	sp|P45856|HBD_BACSU Probable 3-hydroxybutyryl-CoA dehydrogenase OS=Bacillus subtilis (strain 168) GN=mmgB PE=2 SV=1//7.45658e-79
CADAFLAG00013444	AFLA_115260	803.506	1157.9	-0.52713	0.012	sp|Q02981|YP109_YEAST ABC1 family protein YPL109C, mitochondrial OS=Saccharomyces cerevisiae (strain ATCC 204508 / S288c) GN=YPL109C PE=1 SV=2//3.34642e-160
CADAFLAG00013456	AFLA_115380	509.088	802.996	-0.65748	0.0041248	sp|Q99952|PTN18_HUMAN Tyrosine-protein phosphatase non-receptor type 18 OS=Homo sapiens GN=PTPN18 PE=1 SV=2//1.46596e-06
CADAFLAG00013472	AFLA_012370	228.593	423.006	-0.8879	0.0019297	sp|P53970|YNC4_YEAST Uncharacterized protein YNL024C OS=Saccharomyces cerevisiae (strain ATCC 204508 / S288c) GN=YNL024C PE=1 SV=1//5.0483e-25
CADAFLAG00013475	AFLA_012400	629.484	1415.52	-1.1691	6.8022e-07	sp|Q10216|YAY8_SCHPO Uncharacterized oxidoreductase C4H3.08 OS=Schizosaccharomyces pombe (strain 972 / ATCC 24843) GN=SPAC4H3.08 PE=2 SV=1//4.54279e-79
CADAFLAG00000464	AFLA_076820	178.19	1811.34	-3.3456	2.9147e-80	sp|P13006|GOX_ASPNG Glucose oxidase OS=Aspergillus niger GN=gox PE=1 SV=1//1.47834e-100
CADAFLAG00006358	AFLA_057490	623.078	276.808	1.1705	3.2343e-07	-//-
CADAFLAG00009556	AFLA_124980	461.751	2464.98	-2.4164	2.5414e-51	sp|P20370|DC4C_ACIAD 4-carboxymuconolactone decarboxylase OS=Acinetobacter sp. (strain ADP1) GN=pcaC PE=4 SV=2//9.83574e-28
CADAFLAG00009557	AFLA_124990	549.107	5261.88	-3.2604	1.5615e-115	-//-
CADAFLAG00010926	AFLA_049340	22.0825	373.231	-4.0791	9.3613e-37	sp|Q10494|YDG7_SCHPO Uncharacterized oxidoreductase C26F1.07 OS=Schizosaccharomyces pombe (strain 972 / ATCC 24843) GN=SPAC26F1.07 PE=2 SV=1//6.25842e-24
Novel00053	-//-	23.9076	119.288	-2.3189	2.3942e-05	-//-
Novel00061	-//-	181.014	91.1918	0.98913	0.037938	-//-
Novel00081	-//-	457.711	768.881	-0.74832	0.00078325	sp|Q07878|VPS13_YEAST Vacuolar protein sorting-associated protein 13 OS=Saccharomyces cerevisiae (strain ATCC 204508 / S288c) GN=VPS13 PE=1 SV=1//3.0362e-37
Novel00111	-//-	1444.49	1040.27	0.47361	0.0087194	-//-
Novel00151	-//-	52.2447	201.229	-1.9455	8.9109e-07	-//-
Novel00170	-//-	1226.09	2384.27	-0.95948	3.6738e-10	sp|A2QRF6|HOG1_ASPNC Mitogen-activated protein kinase hog1 OS=Aspergillus niger (strain CBS 513.88 / FGSC A1513) GN=hog1 PE=3 SV=2//1.69623e-07
Novel00171	-//-	453.831	849.739	-0.90486	1.7364e-05	sp|A2QRF6|HOG1_ASPNC Mitogen-activated protein kinase hog1 OS=Aspergillus niger (strain CBS 513.88 / FGSC A1513) GN=hog1 PE=3 SV=2//2.7231e-40
Novel00205	-//-	598.419	397.107	0.59163	0.021367	-//-
Novel00226	-//-	4.35059	43.4622	-3.3205	0.00066562	-//-
Novel00230	-//-	1752.42	931.266	0.91209	3.4585e-09	-//-
Novel00273	-//-	157.425	68.573	1.199	0.014035	-//-
Novel00276	-//-	193.548	37.1726	2.3804	4.784e-08	sp|Q10723|ARS_VOLCA Arylsulfatase OS=Volvox carteri PE=1 SV=1//1.23773e-82
Novel00278	-//-	238.297	54.5129	2.1281	3.0829e-08	-//-
Novel00287	-//-	87.9718	188.355	-1.0983	0.01512	-//-
Novel00313	-//-	790.685	421.008	0.90926	1.6626e-05	-//-
Novel00344	-//-	471.626	1088.2	-1.2062	0.0023456	-//-
Novel00363	-//-	14.9682	152.464	-3.3485	4.1059e-12	-//-
Novel00384	-//-	81.187	0		3.9874e-09	sp|Q12753|HAA1_YEAST Transcriptional activator HAA1 OS=Saccharomyces cerevisiae (strain ATCC 204508 / S288c) GN=HAA1 PE=1 SV=1//2.32183e-09
Novel00388	-//-	920.147	2112.69	-1.1991	3.0936e-14	sp|Q8VYI3|ECH2_ARATH Enoyl-CoA hydratase 2, peroxisomal OS=Arabidopsis thaliana GN=ECH2 PE=1 SV=1//7.1831e-27
Novel00395	-//-	1054	1843.84	-0.80684	6.4307e-07	sp|P31434|XYLS_ECOLI Alpha-xylosidase OS=Escherichia coli (strain K12) GN=yicI PE=1 SV=2//0
Novel00399	-//-	135.755	676.972	-2.3181	3.0525e-23	-//-
Novel00407	-//-	421.944	177.575	1.2486	4.837e-06	-//-
Novel00409	-//-	222.982	422.441	-0.92183	0.0016857	-//-
Novel00430	-//-	465.989	278.854	0.74079	0.0097898	sp|P38861|NMD3_YEAST 60S ribosomal export protein NMD3 OS=Saccharomyces cerevisiae (strain ATCC 204508 / S288c) GN=NMD3 PE=1 SV=3//6.27735e-33
Novel00445	-//-	28.1543	121.064	-2.1043	8.6288e-05	-//-
Novel00447	-//-	1222.48	4236.79	-1.7932	2.5329e-13	-//-
Novel00463	-//-	442.499	266.227	0.73302	0.0095337	-//-
Novel00513	-//-	37.9176	126.366	-1.7367	0.00074458	sp|Q2TWN8|RHGB_ASPOR Probable rhamnogalacturonase B OS=Aspergillus oryzae (strain ATCC 42149 / RIB 40) GN=rhgB PE=3 SV=1//2.75457e-131
Novel00518	-//-	6.96203	42.9448	-2.6249	0.010129	-//-
Novel00520	-//-	702.66	402.609	0.80345	0.00027604	-//-
Novel00522	-//-	1356.31	341.137	1.9913	6.5381e-30	-//-
Novel00545	-//-	643.387	1040.27	-0.6932	0.01721	sp|A2R5N0|EGLD_ASPNC Probable endo-beta-1,4-glucanase D OS=Aspergillus niger (strain CBS 513.88 / FGSC A1513) GN=eglD PE=3 SV=1//8.3619e-22
Novel00555	-//-	437.007	277.031	0.65761	0.024555	sp|O13878|UTP17_SCHPO U3 small nucleolar RNA-associated protein 17 OS=Schizosaccharomyces pombe (strain 972 / ATCC 24843) GN=utp17 PE=2 SV=3//8.41382e-08
Novel00580	-//-	93.2072	183.395	-0.97644	0.026247	-//-

## Sheet: af_R_T3 vs. af_R_T2
Gene ID	Gene Name	Readcount		Log2 [(af_R_T3)/(af_R_T2)]	q value	Blast Swissprot
		af_R_T3	af_R_T2
CADAFLAG00000021	AFLA_072380	86.5859	7.72557	3.4864	0.023965	-//-
CADAFLAG00000056	AFLA_072730	57.683	309.14	-2.422	0.011969	sp|P38680|MTR_NEUCR N amino acid transport system protein OS=Neurospora crassa (strain ATCC 24698 / 74-OR23-1A / CBS 708.71 / DSM 1257 / FGSC 987) GN=mtr PE=3 SV=2//3.77948e-10
CADAFLAG00000101	AFLA_073180	75.8698	571.141	-2.9122	2.3373e-05	sp|Q92253|RCO3_NEUCR Probable glucose transporter rco-3 OS=Neurospora crassa (strain ATCC 24698 / 74-OR23-1A / CBS 708.71 / DSM 1257 / FGSC 987) GN=rco-3 PE=3 SV=2//7.35415e-154
CADAFLAG00000104	AFLA_073210	174.684	756.719	-2.115	0.0039292	sp|O34767|OXDD_BACSU Oxalate decarboxylase OxdD OS=Bacillus subtilis (strain 168) GN=oxdD PE=1 SV=1//4.41636e-08
CADAFLAG00000115	AFLA_073320	127.137	490.168	-1.9469	0.0457	sp|P07871|THIKB_RAT 3-ketoacyl-CoA thiolase B, peroxisomal OS=Rattus norvegicus GN=Acaa1b PE=2 SV=2//2.3459e-135
CADAFLAG00000139	AFLA_073560	4309.22	1653.95	1.3815	0.00017208	sp|P19145|GAP1_YEAST General amino-acid permease GAP1 OS=Saccharomyces cerevisiae (strain ATCC 204508 / S288c) GN=GAP1 PE=1 SV=2//0
CADAFLAG00000161	AFLA_073780	891.406	133.936	2.7345	7.494e-10	-//-
CADAFLAG00000163	AFLA_073800	594.56	39.1229	3.9257	1.3102e-12	sp|Q9RPT1|RHLG_PSEAE Rhamnolipids biosynthesis 3-oxoacyl-[acyl-carrier-protein] reductase OS=Pseudomonas aeruginosa (strain ATCC 15692 / PAO1 / 1C / PRS 101 / LMG 12228) GN=rhlG PE=1 SV=1//1.75302e-37
CADAFLAG00000164	AFLA_073810	228.453	0		1.7261e-10	sp|O14019|HAL4_SCHPO Serine/threonine-protein kinase hal4 OS=Schizosaccharomyces pombe (strain 972 / ATCC 24843) GN=hal4 PE=1 SV=1//6.598e-56
CADAFLAG00000167	AFLA_073840	764.349	22.0607	5.1147	1.6355e-19	sp|Q64392|AT12A_CAVPO Potassium-transporting ATPase alpha chain 2 OS=Cavia porcellus GN=ATP12A PE=2 SV=1//5.44477e-169
CADAFLAG00000168	AFLA_073850	1072.33	468.485	1.1947	0.019927	sp|Q8CGA2|TBC14_MOUSE TBC1 domain family member 14 OS=Mus musculus GN=Tbc1d14 PE=2 SV=2//2.28095e-24
CADAFLAG00000211	AFLA_074280	129.64	537.637	-2.0521	0.005331	sp|A1JS71|6PGL_YERE8 6-phosphogluconolactonase OS=Yersinia enterocolitica serotype O:8 / biotype 1B (strain 8081) GN=pgl PE=3 SV=1//1.23431e-07
CADAFLAG00000212	AFLA_074290	51.3529	255.517	-2.3149	0.039568	-//-
CADAFLAG00000237	AFLA_074540	766.951	4799.65	-2.6457	6.4707e-08	sp|P38364|PID6_FUSSO Pisatin demethylase OS=Fusarium solani subsp. pisi GN=PDA6-1 PE=3 SV=1//2.18463e-23
CADAFLAG00000269	AFLA_074870	148.682	29.6212	2.3275	0.034486	-//-
CADAFLAG00000276	AFLA_074940	1400.07	485.469	1.528	0.001627	sp|P54232|VEF_GVHA Viral-enhancing factor OS=Heliothis armigera granulosis virus GN=VEF PE=3 SV=1//2.2979e-34
CADAFLAG00000294	AFLA_075120	338.147	890.734	-1.3973	0.048326	sp|Q9UJS0|CMC2_HUMAN Calcium-binding mitochondrial carrier protein Aralar2 OS=Homo sapiens GN=SLC25A13 PE=1 SV=2//9.5081e-155
CADAFLAG00000349	AFLA_075670	138.967	1900.23	-3.7734	0.04612	sp|P86491|6HN3M_PSEFL 6-hydroxynicotinate 3-monooxygenase OS=Pseudomonas fluorescens PE=1 SV=1//2.29519e-18
CADAFLAG00000398	AFLA_076160	803.144	68.9091	3.5429	5.1409e-13	-//-
CADAFLAG00000399	AFLA_076170	71500.4	4110.36	4.1206	3.7456e-35	-//-
CADAFLAG00000400	AFLA_076180	13691	728.944	4.2313	4.8636e-34	-//-
CADAFLAG00000401	AFLA_076190	2048.53	64.4058	4.9913	7.8466e-32	-//-
CADAFLAG00000435	AFLA_076530	735.308	241.842	1.6043	0.0056558	sp|P36035|JEN1_YEAST Carboxylic acid transporter protein homolog OS=Saccharomyces cerevisiae (strain ATCC 204508 / S288c) GN=JEN1 PE=1 SV=1//3.95332e-31
CADAFLAG00000464	AFLA_076820	110.676	2142.91	-4.2752	1.6219e-15	sp|P13006|GOX_ASPNG Glucose oxidase OS=Aspergillus niger GN=gox PE=1 SV=1//1.47834e-100
CADAFLAG00000486	AFLA_077040	333.247	998.687	-1.5834	0.042414	sp|Q4WGV9|PLYD_ASPFU Probable pectate lyase D OS=Neosartorya fumigata (strain ATCC MYA-4609 / Af293 / CBS 101355 / FGSC A1100) GN=plyD PE=3 SV=1//2.35603e-101
CADAFLAG00000530	AFLA_077480	1177.18	110.633	3.4115	9.3627e-14	sp|P30617|LEC_GALNI Mannose-specific lectin OS=Galanthus nivalis PE=1 SV=1//1.56286e-06
CADAFLAG00000541	AFLA_077590	103.189	467.282	-2.179	0.0039095	sp|P46950|SNG1_YEAST Nitrosoguanidine resistance protein SNG1 OS=Saccharomyces cerevisiae (strain ATCC 204508 / S288c) GN=SNG1 PE=1 SV=1//3.50799e-10
CADAFLAG00000568	AFLA_077860	1609.22	750.605	1.1002	0.046829	sp|A5H0J3|URC4_LACKL Uracil catabolism protein 4 OS=Lachancea kluyveri GN=URC4 PE=3 SV=1//4.33019e-112
CADAFLAG00000569	AFLA_077870	26.0485	277.743	-3.4145	0.00030617	sp|O59699|YN42_SCHPO Uncharacterized transporter C36.02c OS=Schizosaccharomyces pombe (strain 972 / ATCC 24843) GN=SPBC36.02c PE=2 SV=1//1.37625e-64
CADAFLAG00000603	AFLA_078210	358.27	21.8956	4.0323	3.9309e-09	-//-
CADAFLAG00000684	AFLA_079020	80.3354	854.668	-3.4113	5.3657e-08	-//-
CADAFLAG00000748	AFLA_079660	490.223	120.426	2.0253	0.00050622	-//-
CADAFLAG00000767	AFLA_079850	3142.16	979.315	1.6819	7.3955e-06	sp|O13899|YF38_SCHPO Uncharacterized CDP-alcohol phosphatidyltransferase class-I family protein C22A12.08c OS=Schizosaccharomyces pombe (strain 972 / ATCC 24843) GN=SPAC22A12.08c PE=2 SV=1//5.08617e-73
CADAFLAG00000919	AFLA_081380	974.38	2146.74	-1.1396	0.046829	sp|P07142|CY1_NEUCR Cytochrome c1, heme protein, mitochondrial OS=Neurospora crassa (strain ATCC 24698 / 74-OR23-1A / CBS 708.71 / DSM 1257 / FGSC 987) GN=cyt-1 PE=2 SV=1//2.13409e-36
CADAFLAG00000959	AFLA_081790	28.5081	230.234	-3.0137	0.0071146	sp|P15245|PH2M_TRICU Phenol 2-monooxygenase OS=Trichosporon cutaneum PE=1 SV=3//6.36477e-11
CADAFLAG00000996	AFLA_082160	316.812	55.2341	2.52	0.00088264	sp|P49374|HGT1_KLULA High-affinity glucose transporter OS=Kluyveromyces lactis (strain ATCC 8585 / CBS 2359 / DSM 70799 / NBRC 1267 / NRRL Y-1140 / WM37) GN=HGT1 PE=3 SV=1//2.94268e-08
CADAFLAG00001019	AFLA_082390	241.439	832.277	-1.7854	0.0087611	sp|B8MYV0|XYND_ASPFN Probable exo-1,4-beta-xylosidase xlnD OS=Aspergillus flavus (strain ATCC 200026 / FGSC A1120 / NRRL 3357 / JCM 12722 / SRRC 167) GN=xlnD PE=3 SV=1//0
CADAFLAG00001059	AFLA_082790	325.056	56.6802	2.5198	0.00056189	-//-
CADAFLAG00001091	AFLA_083110	177.468	9.33669	4.2485	1.9971e-05	sp|P10713|CON10_NEUCR Conidiation-specific protein 10 OS=Neurospora crassa (strain ATCC 24698 / 74-OR23-1A / CBS 708.71 / DSM 1257 / FGSC 987) GN=con-10 PE=2 SV=1//3.78941e-06
CADAFLAG00001092	AFLA_083120	1723.21	645.261	1.4171	0.0010852	sp|Q9UW02|THIO_COPCM Thioredoxin OS=Coprinus comatus PE=1 SV=1//1.40843e-32
CADAFLAG00001251	AFLA_084720	985.304	246.966	1.9963	1.1067e-05	sp|O93870|FCR1_CANAX Fluconazole resistance protein 1 OS=Candida albicans GN=FCR1 PE=4 SV=1//2.5982e-17
CADAFLAG00001253	AFLA_084740	311.604	1010.66	-1.6975	0.01129	-//-
CADAFLAG00001265	AFLA_084860	6534.65	2849.04	1.1976	0.0021022	-//-
CADAFLAG00001274	AFLA_084950	612.107	223.586	1.453	0.0035201	-//-
CADAFLAG00001326	AFLA_085470	125.796	24.7878	2.3434	0.041932	-//-
CADAFLAG00001327	AFLA_085480	128.385	495.787	-1.9492	0.0081978	sp|Q8J0P4|CRF1_ASPFU Probable glycosidase crf1 OS=Neosartorya fumigata (strain ATCC MYA-4609 / Af293 / CBS 101355 / FGSC A1100) GN=crf1 PE=1 SV=2//1.19353e-78
CADAFLAG00001367	AFLA_085880	239.776	38.7929	2.6278	0.00042961	-//-
CADAFLAG00001445	AFLA_086660	281.819	86.9224	1.697	0.015908	sp|P40035|PIC2_YEAST Mitochondrial phosphate carrier protein 2 OS=Saccharomyces cerevisiae (strain ATCC 204508 / S288c) GN=PIC2 PE=1 SV=1//8.46428e-08
CADAFLAG00001496	AFLA_087170	778.632	2568.62	-1.722	0.0022907	-//-
CADAFLAG00001500	AFLA_087220	104.888	532.639	-2.3443	0.0016011	sp|Q553X7|GALE_DICDI UDP-glucose 4-epimerase OS=Dictyostelium discoideum GN=galE PE=1 SV=1//1.39768e-68
CADAFLAG00001528	AFLA_087500	876.862	350.291	1.3238	0.0056341	sp|Q10213|SRS2_SCHPO ATP-dependent DNA helicase srs2 OS=Schizosaccharomyces pombe (strain 972 / ATCC 24843) GN=srs2 PE=2 SV=1//5.54218e-77
CADAFLAG00001573	AFLA_087950	242.563	679.833	-1.4868	0.033997	sp|O14104|LYS12_SCHPO Probable homoisocitrate dehydrogenase OS=Schizosaccharomyces pombe (strain 972 / ATCC 24843) GN=lys12 PE=1 SV=1//2.35331e-14
CADAFLAG00001677	AFLA_023010	760.959	31.2323	4.6067	4.9512e-18	-//-
CADAFLAG00001702	AFLA_023260	211.874	60.1934	1.8155	0.015546	sp|P28348|NIRA_EMENI Nitrogen assimilation transcription factor nirA OS=Emericella nidulans (strain FGSC A4 / ATCC 38163 / CBS 112.46 / NRRL 194 / M139) GN=nirA PE=4 SV=1//3.30703e-32
CADAFLAG00001707	AFLA_023310	20.0385	236.844	-3.5631	0.00049123	-//-
CADAFLAG00001721	AFLA_023450	1134.48	313.808	1.8541	8.5517e-05	-//-
CADAFLAG00001722	AFLA_023460	128.55	715.569	-2.4768	0.00015584	sp|Q9USK8|AGS1_SCHPO Cell wall alpha-1,3-glucan synthase ags1 OS=Schizosaccharomyces pombe (strain 972 / ATCC 24843) GN=ags1 PE=1 SV=3//6.85124e-07
CADAFLAG00001726	AFLA_023500	467.6	3209.66	-2.7791	0.030391	-//-
CADAFLAG00001728	AFLA_023520	470.215	123.153	1.9329	0.00068723	sp|Q9P6J8|YHD2_SCHPO Uncharacterized deaminase C1683.02 OS=Schizosaccharomyces pombe (strain 972 / ATCC 24843) GN=SPBC1683.02 PE=2 SV=1//1.4794e-85
CADAFLAG00001736	AFLA_023600	3773.41	11586.2	-1.6185	0.00067534	-//-
CADAFLAG00001753	AFLA_023770	181.571	669.671	-1.8829	0.0065971	-//-
CADAFLAG00001754	AFLA_023780	171.799	740.395	-2.1076	0.010989	sp|P53912|YNN4_YEAST Uncharacterized protein YNL134C OS=Saccharomyces cerevisiae (strain ATCC 204508 / S288c) GN=YNL134C PE=1 SV=1//1.12644e-20
CADAFLAG00001837	AFLA_024610	70.0582	4.66835	3.9076	0.04981	sp|C0SPA5|ADHA_BACSU Probable formaldehyde dehydrogenase AdhA OS=Bacillus subtilis (strain 168) GN=adhA PE=2 SV=1//5.28977e-42
CADAFLAG00001853	AFLA_024770	3.41881	75.8487	-4.4716	0.019477	sp|Q13231|CHIT1_HUMAN Chitotriosidase-1 OS=Homo sapiens GN=CHIT1 PE=1 SV=1//2.12816e-34
CADAFLAG00001880	AFLA_025040	275.341	75.6837	1.8632	0.048326	-//-
CADAFLAG00001889	AFLA_025130	350.406	1217.48	-1.7968	0.011429	-//-
CADAFLAG00001895	AFLA_025190	9.55002	114.477	-3.5834	0.022103	sp|O59952|LIP_THELA Lipase OS=Thermomyces lanuginosus GN=LIP PE=1 SV=1//6.27361e-69
CADAFLAG00001909	AFLA_025330	5664.2	1489.94	1.9266	1.6792e-08	-//-
CADAFLAG00001928	AFLA_025520	503.731	23.5068	4.4215	6.8571e-13	-//-
CADAFLAG00001961	AFLA_025860	719.231	1658.19	-1.2051	0.04471	-//-
CADAFLAG00002004	AFLA_026290	1120.21	450.181	1.3152	0.017444	sp|O94321|MPR1_SCHPO Multistep phosphorelay regulator 1 OS=Schizosaccharomyces pombe (strain 972 / ATCC 24843) GN=mpr1 PE=1 SV=1//1.31685e-20
CADAFLAG00002007	AFLA_026320	545.51	135.712	2.0071	0.00018935	-//-
CADAFLAG00002114	AFLA_027390	887.373	2123.73	-1.259	0.034936	sp|O42932|QCR6_SCHPO Cytochrome b-c1 complex subunit 6 OS=Schizosaccharomyces pombe (strain 972 / ATCC 24843) GN=qcr6 PE=2 SV=1//4.51369e-13
CADAFLAG00002156	AFLA_027810	10355.8	22748.1	-1.1353	0.03869	sp|P12547|ORYZ_ASPOR Alkaline protease 1 OS=Aspergillus oryzae (strain ATCC 42149 / RIB 40) GN=alp1 PE=1 SV=2//5.86444e-09
CADAFLAG00002206	AFLA_028310	332.495	1810.68	-2.4451	2.8203e-05	-//-
CADAFLAG00002217	AFLA_028420	196.013	7.72557	4.6652	9.7351e-07	sp|Q5B601|Y4029_EMENI Uncharacterized protein AN4029 OS=Emericella nidulans (strain FGSC A4 / ATCC 38163 / CBS 112.46 / NRRL 194 / M139) GN=AN4029 PE=1 SV=1//6.56049e-07
CADAFLAG00002249	AFLA_028740	123.33	541.024	-2.1332	0.0031398	sp|B2GV06|SCOT1_RAT Succinyl-CoA:3-ketoacid coenzyme A transferase 1, mitochondrial OS=Rattus norvegicus GN=Oxct1 PE=1 SV=1//2.46179e-16
CADAFLAG00002264	AFLA_028890	379.067	1261.88	-1.7351	0.0039239	sp|P70792|TTUC4_AGRVI Probable tartrate dehydrogenase/decarboxylase TtuC&apos; OS=Agrobacterium vitis GN=ttuC&apos; PE=2 SV=1//1.66422e-161
CADAFLAG00002270	AFLA_028950	353.4	105.635	1.7422	0.041035	sp|Q09850|ENG2_SCHPO Putative endo-1,3(4)-beta-glucanase 2 OS=Schizosaccharomyces pombe (strain 972 / ATCC 24843) GN=eng2 PE=2 SV=1//2.67485e-165
CADAFLAG00002274	AFLA_028990	2952.81	525.621	2.49	2.1907e-12	-//-
CADAFLAG00002275	AFLA_029000	1545.88	293.359	2.3977	7.5646e-09	-//-
CADAFLAG00002291	AFLA_029160	91.7935	404.283	-2.1389	0.020204	sp|Q2UK93|XGEA_ASPOR Probable xyloglucan-specific endo-beta-1,4-glucanase A OS=Aspergillus oryzae (strain ATCC 42149 / RIB 40) GN=xgeA PE=3 SV=1//2.49439e-62
CADAFLAG00002314	AFLA_029390	279.28	749.858	-1.4249	0.047665	-//-
CADAFLAG00002360	AFLA_029850	58.5126	627.947	-3.4238	7.3851e-07	-//-
CADAFLAG00002363	AFLA_029880	60.1466	630.509	-3.39	1.3573e-06	sp|P21375|OSM1_YEAST Osmotic growth protein 1 OS=Saccharomyces cerevisiae (strain ATCC 204508 / S288c) GN=OSM1 PE=1 SV=3//7.81857e-86
CADAFLAG00002370	AFLA_029950	307.228	23.1767	3.7286	4.7186e-08	sp|Q9USW3|YHZ7_SCHPO Probable glycosidase C21B10.07 OS=Schizosaccharomyces pombe (strain 972 / ATCC 24843) GN=SPBC21B10.07 PE=2 SV=1//8.71664e-11
CADAFLAG00002474	AFLA_030990	535.116	206.562	1.3733	0.038454	-//-
CADAFLAG00002484	AFLA_031090	1093.21	222.139	2.299	1.5194e-08	sp|Q8SVY9|Y3G1_ENCCU Uncharacterized protein ECU03_1610 OS=Encephalitozoon cuniculi (strain GB-M1) GN=ECU03_1610 PE=1 SV=1//2.97737e-06
CADAFLAG00002532	AFLA_031570	524.261	1385.62	-1.4022	0.048023	sp|Q2UKV4|PDC_ASPOR Pyruvate decarboxylase OS=Aspergillus oryzae (strain ATCC 42149 / RIB 40) GN=pdcA PE=3 SV=1//1.51425e-08
CADAFLAG00002565	AFLA_031900	327.672	30.5722	3.422	1.78e-08	sp|O74770|PHK_SCHPO Probable phosphoketolase OS=Schizosaccharomyces pombe (strain 972 / ATCC 24843) GN=SPBC24C6.09c PE=2 SV=1//1.63054e-19
CADAFLAG00002566	AFLA_031910	210.606	21.8956	3.2658	0.00016694	sp|Q7SH17|ACKA_NEUCR Probable acetate kinase OS=Neurospora crassa (strain ATCC 24698 / 74-OR23-1A / CBS 708.71 / DSM 1257 / FGSC 987) GN=B12J7.040 PE=3 SV=3//1.64087e-164
CADAFLAG00002584	AFLA_032090	911.865	365.946	1.3172	0.01423	-//-
CADAFLAG00002592	AFLA_032170	1343.93	426.179	1.6569	0.00030617	sp|P08092|RAN1_SCHPO Negative regulator of sexual conjugation and meiosis OS=Schizosaccharomyces pombe (strain 972 / ATCC 24843) GN=ran1 PE=1 SV=2//1.75132e-22
CADAFLAG00002598	AFLA_032230	834.089	172.564	2.2731	2.4603e-07	sp|O94559|YF65_SCHPO Uncharacterized protein C23C4.05c OS=Schizosaccharomyces pombe (strain 972 / ATCC 24843) GN=SPAC23C4.05c PE=2 SV=1//7.5628e-11
CADAFLAG00002604	AFLA_032290	335.18	43.1312	2.9581	8.0476e-07	-//-
CADAFLAG00002642	AFLA_032670	3565.21	701.854	2.3447	2.9384e-10	-//-
CADAFLAG00002651	AFLA_032760	1482.99	692.77	1.0981	0.035465	sp|P78814|SRP2_SCHPO Pre-mRNA-splicing factor srp2 OS=Schizosaccharomyces pombe (strain 972 / ATCC 24843) GN=srp2 PE=1 SV=2//2.12769e-26
CADAFLAG00002664	AFLA_032890	1862.41	719.208	1.3727	0.0032169	sp|A6ZRR2|MDG1_YEAS7 Signal transduction protein MDG1 OS=Saccharomyces cerevisiae (strain YJM789) GN=MDG1 PE=3 SV=1//5.41127e-08
CADAFLAG00002795	AFLA_034200	111.496	414.445	-1.8942	0.032353	sp|O94628|YGE9_SCHPO Uncharacterized methyltransferase C1347.09 OS=Schizosaccharomyces pombe (strain 972 / ATCC 24843) GN=SPBC1347.09 PE=2 SV=1//3.90093e-07
CADAFLAG00002813	AFLA_034380	433.448	108.362	2	0.0023532	sp|P55306|CATA_SCHPO Catalase OS=Schizosaccharomyces pombe (strain 972 / ATCC 24843) GN=cta1 PE=1 SV=1//2.68389e-145
CADAFLAG00002904	AFLA_035290	289.689	12.5589	4.5277	1.3515e-08	sp|P16387|ODPA_YEAST Pyruvate dehydrogenase E1 component subunit alpha, mitochondrial OS=Saccharomyces cerevisiae (strain ATCC 204508 / S288c) GN=PDA1 PE=1 SV=2//1.19024e-56
CADAFLAG00002955	AFLA_035800	236.44	31.0673	2.928	0.00013306	sp|P45796|XYND_PAEPO Arabinoxylan arabinofuranohydrolase OS=Paenibacillus polymyxa GN=xynD PE=1 SV=1//6.25503e-11
CADAFLAG00002970	AFLA_035950	398.455	112.079	1.8299	0.019927	-//-
CADAFLAG00002976	AFLA_036010	458.211	125.094	1.873	0.0022024	sp|O94467|OYEC_SCHPO Putative NADPH dehydrogenase C23G7.10c OS=Schizosaccharomyces pombe (strain 972 / ATCC 24843) GN=SPBC23G7.10c PE=2 SV=1//1.0376e-06
CADAFLAG00002988	AFLA_036130	103.099	466.952	-2.1792	0.0046509	sp|Q12664|CP51_PENIT Eburicol 14-alpha-demethylase OS=Penicillium italicum GN=CYP51 PE=3 SV=1//0
CADAFLAG00003007	AFLA_036320	100.925	396.927	-1.9756	0.011879	sp|Q10361|ETP1_SCHPO Electron transfer protein 1, mitochondrial OS=Schizosaccharomyces pombe (strain 972 / ATCC 24843) GN=etp1 PE=1 SV=2//2.04098e-107
CADAFLAG00003011	AFLA_036360	489.401	51.5168	3.2479	9.1472e-09	sp|P0C582|M2OM_NEUCR Putative mitochondrial 2-oxoglutarate/malate carrier protein OS=Neurospora crassa (strain ATCC 24698 / 74-OR23-1A / CBS 708.71 / DSM 1257 / FGSC 987) GN=NCU04792 PE=3 SV=1//3.56832e-126
CADAFLAG00003015	AFLA_036400	184.348	0		1.5028e-08	-//-
CADAFLAG00003038	AFLA_036630	1710.88	644.931	1.4075	0.001063	sp|B8N4G0|CRED_ASPFN Probable HECT-type ubiquitin ligase-interacting protein creD OS=Aspergillus flavus (strain ATCC 200026 / FGSC A1120 / NRRL 3357 / JCM 12722 / SRRC 167) GN=creD PE=3 SV=1//0
CADAFLAG00003054	AFLA_036800	184.881	31.0673	2.5731	0.0036106	sp|Q8T675|ABCGJ_DICDI ABC transporter G family member 19 OS=Dictyostelium discoideum GN=abcG19 PE=3 SV=1//5.1823e-11
CADAFLAG00003203	AFLA_013180	5579.37	186.278	4.9046	6.1043e-42	sp|Q8N6F8|WBS27_HUMAN Williams-Beuren syndrome chromosomal region 27 protein OS=Homo sapiens GN=WBSCR27 PE=2 SV=2//4.04562e-14
CADAFLAG00003215	AFLA_013300	686.852	59.0774	3.5393	1.1907e-12	sp|Q01284|2NPD_NEUCR Nitronate monooxygenase OS=Neurospora crassa (strain ATCC 24698 / 74-OR23-1A / CBS 708.71 / DSM 1257 / FGSC 987) GN=ncd-2 PE=1 SV=1//3.67047e-28
CADAFLAG00003260	AFLA_013750	107.019	1453.25	-3.7633	1.3204e-10	-//-
CADAFLAG00003261	AFLA_013760	430.417	1555.9	-1.8539	0.0011323	sp|O14405|GUN4_HYPJE Endoglucanase-4 OS=Hypocrea jecorina GN=cel61a PE=1 SV=1//1.23913e-85
CADAFLAG00003262	AFLA_013770	272.072	4770.81	-4.1322	1.6393e-07	-//-
CADAFLAG00003263	AFLA_013780	181.625	3952.7	-4.4438	2.1437e-06	-//-
CADAFLAG00003271	AFLA_013860	560.696	227.633	1.3005	0.029346	-//-
CADAFLAG00003273	AFLA_013880	24.3245	201.108	-3.0475	0.005982	sp|Q9P8W1|LIP4_CANAL Lipase 4 OS=Candida albicans (strain SC5314 / ATCC MYA-2876) GN=LIP4 PE=3 SV=1//5.75388e-60
CADAFLAG00003295	AFLA_014100	1383.03	3288.42	-1.2496	0.049934	sp|Q7S6U4|CVNH_NEUCR Cyanovirin-N homolog OS=Neurospora crassa (strain ATCC 24698 / 74-OR23-1A / CBS 708.71 / DSM 1257 / FGSC 987) GN=NCU05495 PE=1 SV=2//2.21169e-11
CADAFLAG00003304	AFLA_014190	190.627	3.05722	5.9624	7.0594e-08	sp|B8N5S6|BGLM_ASPFN Probable beta-glucosidase M OS=Aspergillus flavus (strain ATCC 200026 / FGSC A1120 / NRRL 3357 / JCM 12722 / SRRC 167) GN=bglM PE=3 SV=1//2.51769e-17
CADAFLAG00003308	AFLA_014230	579.165	14.005	5.37	1.0955e-17	sp|O14111|PSD3_SCHPO Phosphatidylserine decarboxylase proenzyme 3 OS=Schizosaccharomyces pombe (strain 972 / ATCC 24843) GN=psd3 PE=2 SV=2//7.78145e-40
CADAFLAG00003309	AFLA_014240	131.768	3.22225	5.3538	0.00017068	-//-
CADAFLAG00003330	AFLA_014450	21.3885	190.325	-3.1536	0.0044455	sp|Q9UTN0|YII3_SCHPO Uncharacterized transcriptional regulatory protein C139.03 OS=Schizosaccharomyces pombe (strain 972 / ATCC 24843) GN=SPAC139.03 PE=2 SV=1//4.97705e-14
CADAFLAG00003374	AFLA_014890	19.1693	180.328	-3.2338	0.008752	-//-
CADAFLAG00003403	AFLA_015180	465.688	169.177	1.4608	0.0082431	-//-
CADAFLAG00003434	AFLA_015490	135.559	662.276	-2.2885	0.00059437	sp|P15245|PH2M_TRICU Phenol 2-monooxygenase OS=Trichosporon cutaneum PE=1 SV=3//2.17947e-96
CADAFLAG00003439	AFLA_015540	62.8318	0		0.01129	sp|P38680|MTR_NEUCR N amino acid transport system protein OS=Neurospora crassa (strain ATCC 24698 / 74-OR23-1A / CBS 708.71 / DSM 1257 / FGSC 987) GN=mtr PE=3 SV=2//1.25099e-42
CADAFLAG00003442	AFLA_015570	145.464	784.313	-2.4308	0.00017208	-//-
CADAFLAG00003465	AFLA_015800	2043.01	982.246	1.0565	0.036007	-//-
CADAFLAG00003473	AFLA_015880	219.027	43.4612	2.3333	0.0031315	sp|O74208|PDH1_CANGA ATP-binding cassette transporter CGR1 OS=Candida glabrata (strain ATCC 2001 / CBS 138 / JCM 3761 / NBRC 0622 / NRRL Y-65) GN=PDH1 PE=3 SV=3//0
CADAFLAG00003506	AFLA_016210	124.893	626.792	-2.3273	0.0022618	-//-
CADAFLAG00003595	AFLA_017100	698.15	2612.54	-1.9038	0.00021759	sp|Q2UCU3|BGALA_ASPOR Probable beta-galactosidase A OS=Aspergillus oryzae (strain ATCC 42149 / RIB 40) GN=lacA PE=3 SV=1//0
CADAFLAG00003621	AFLA_017360	1492.35	463.321	1.6875	4.1865e-05	-//-
CADAFLAG00003626	AFLA_017410	1202.74	50.0707	4.5862	6.1114e-23	sp|Q01358|BLI3_NEUCR Protein bli-3 OS=Neurospora crassa (strain ATCC 24698 / 74-OR23-1A / CBS 708.71 / DSM 1257 / FGSC 987) GN=bli-3 PE=2 SV=1//1.05045e-10
CADAFLAG00003647	AFLA_017620	2418.57	6878.15	-1.5079	0.0020533	sp|Q76MU7|H4_ASPOR Histone H4 OS=Aspergillus oryzae (strain ATCC 42149 / RIB 40) GN=hhfA PE=3 SV=3//3.14184e-51
CADAFLAG00003661	AFLA_017760	336.062	1933.65	-2.5245	0.044987	sp|P15245|PH2M_TRICU Phenol 2-monooxygenase OS=Trichosporon cutaneum PE=1 SV=3//4.20266e-142
CADAFLAG00003670	AFLA_017850	926.564	66.3079	3.8046	1.4894e-17	-//-
CADAFLAG00003671	AFLA_017860	654.654	175.456	1.8996	5.823e-05	-//-
CADAFLAG00003673	AFLA_017880	250.653	60.1934	2.058	0.0023532	-//-
CADAFLAG00003687	AFLA_018020	45.4913	588.746	-3.694	0.0033766	-//-
CADAFLAG00003689	AFLA_018040	29.7557	524.127	-4.1387	1.7173e-09	sp|P81156|GOX_PENAG Glucose oxidase OS=Penicillium amagasakiense PE=1 SV=1//0
CADAFLAG00003709	AFLA_018240	477.127	144.884	1.7195	0.0027114	sp|O14035|YEME_SCHPO Uncharacterized permease C29B12.14c OS=Schizosaccharomyces pombe (strain 972 / ATCC 24843) GN=SPAC29B12.14c PE=2 SV=2//2.38085e-28
CADAFLAG00003716	AFLA_018310	614.447	188.549	1.7043	0.0051515	sp|P24322|GGPPS_NEUCR Geranylgeranyl pyrophosphate synthase OS=Neurospora crassa (strain ATCC 24698 / 74-OR23-1A / CBS 708.71 / DSM 1257 / FGSC 987) GN=al-3 PE=2 SV=2//3.80532e-148
CADAFLAG00003740	AFLA_018550	5557.75	2144.43	1.3739	0.0046392	sp|P06738|PHSG_YEAST Glycogen phosphorylase OS=Saccharomyces cerevisiae (strain ATCC 204508 / S288c) GN=GPH1 PE=1 SV=4//0
CADAFLAG00003786	AFLA_019010	924.637	310.586	1.5739	0.0029688	-//-
CADAFLAG00003803	AFLA_019180	480.85	106.091	2.1803	0.00010287	-//-
CADAFLAG00003844	AFLA_019590	113.537	20.1195	2.4965	0.042227	-//-
CADAFLAG00003885	AFLA_020000	19.9089	346.07	-4.1196	0.042739	sp|P17872|PME_ASPTU Pectinesterase OS=Aspergillus tubingensis GN=pme1 PE=1 SV=1//0
CADAFLAG00003957	AFLA_020720	7003.16	3169.33	1.1438	0.0050313	-//-
CADAFLAG00003979	AFLA_020940	59.1206	0		0.01726	-//-
CADAFLAG00004001	AFLA_021160	428.794	39.2879	3.4481	3.1257e-08	sp|Q10494|YDG7_SCHPO Uncharacterized oxidoreductase C26F1.07 OS=Schizosaccharomyces pombe (strain 972 / ATCC 24843) GN=SPAC26F1.07 PE=2 SV=1//3.35407e-82
CADAFLAG00004009	AFLA_021240	954.003	271.133	1.815	0.00020047	-//-
CADAFLAG00004015	AFLA_021300	83.7127	3.05722	4.7752	0.0048201	sp|Q7XSA2|AGO1B_ORYSJ Protein argonaute 1B OS=Oryza sativa subsp. japonica GN=AGO1B PE=2 SV=3//2.89074e-56
CADAFLAG00004018	AFLA_021330	67.0846	283.236	-2.078	0.030217	sp|C4Y3M4|AIM9_CLAL4 Altered inheritance of mitochondria protein 9, mitochondrial OS=Clavispora lusitaniae (strain ATCC 42720) GN=AIM9 PE=3 SV=1//1.44442e-29
CADAFLAG00004173	AFLA_104360	448.702	161.946	1.4702	0.015816	sp|Q9P2E3|ZNFX1_HUMAN NFX1-type zinc finger-containing protein 1 OS=Homo sapiens GN=ZNFX1 PE=1 SV=2//3.55773e-06
CADAFLAG00004174	AFLA_104370	264.875	64.0758	2.0475	0.0092159	-//-
CADAFLAG00004175	AFLA_104380	372.804	86.4665	2.1082	0.0027881	-//-
CADAFLAG00004227	AFLA_104900	1487.7	21.7306	6.0972	4.8938e-35	sp|P49374|HGT1_KLULA High-affinity glucose transporter OS=Kluyveromyces lactis (strain ATCC 8585 / CBS 2359 / DSM 70799 / NBRC 1267 / NRRL Y-1140 / WM37) GN=HGT1 PE=3 SV=1//3.8664e-13
CADAFLAG00004229	AFLA_104920	446.467	3834.43	-3.1024	6.669e-06	sp|A1C9G0|CUTI3_ASPCL Probable cutinase 3 OS=Aspergillus clavatus (strain ATCC 1007 / CBS 513.65 / DSM 816 / NCTC 3887 / NRRL 1) GN=ACLA_055320 PE=3 SV=1//2.79298e-30
CADAFLAG00004285	AFLA_105480	72.1062	4.66835	3.9491	0.042295	-//-
CADAFLAG00004300	AFLA_105630	4510.25	773.065	2.5445	1.3667e-10	sp|O13317|TRI11_FUSSP Isotrichodermin C-15 hydroxylase OS=Fusarium sporotrichioides GN=TRI11 PE=3 SV=1//1.77737e-123
CADAFLAG00004328	AFLA_105920	297.841	919.695	-1.6266	0.019477	sp|B8N7Z8|PGLRB_ASPFN Probable endopolygalacturonase B OS=Aspergillus flavus (strain ATCC 200026 / FGSC A1120 / NRRL 3357 / JCM 12722 / SRRC 167) GN=pgaB PE=3 SV=1//8.16202e-14
CADAFLAG00004479	AFLA_107430	17.2548	501.116	-4.8601	8.627e-07	-//-
CADAFLAG00004516	AFLA_107800	43.7401	248.743	-2.5076	0.035695	sp|P53626|E13B_TRIHA Glucan endo-1,3-beta-glucosidase BGN13.1 OS=Trichoderma harzianum GN=bgn13.1 PE=1 SV=1//1.37014e-147
CADAFLAG00004609	AFLA_108740	3714.67	1067.74	1.7987	0.00057895	-//-
CADAFLAG00004673	AFLA_109390	682.807	208.96	1.7083	0.0007299	-//-
CADAFLAG00004746	AFLA_110120	45.7545	470.135	-3.3611	1.9499e-05	-//-
CADAFLAG00004747	AFLA_110130	523.824	5167.37	-3.3023	2.6254e-11	sp|P16000|ATP9_EMENI ATP synthase subunit 9, mitochondrial OS=Emericella nidulans (strain FGSC A4 / ATCC 38163 / CBS 112.46 / NRRL 194 / M139) GN=atp9 PE=3 SV=2//3.10253e-46
CADAFLAG00004785	AFLA_110510	690.709	63.7457	3.4377	3.2926e-12	sp|O42665|YF8B_SCHPO Uncharacterized but2-like protein C27D7.11c OS=Schizosaccharomyces pombe (strain 972 / ATCC 24843) GN=SPAC27D7.11c PE=2 SV=1//6.26969e-08
CADAFLAG00004860	AFLA_111260	523.055	25.1179	4.3802	5.7097e-13	sp|O43014|MPI_SCHPO Mannose-6-phosphate isomerase OS=Schizosaccharomyces pombe (strain 972 / ATCC 24843) GN=pmi40 PE=2 SV=1//4.8805e-68
CADAFLAG00004887	AFLA_111530	570.608	132.82	2.103	8.9586e-05	sp|O94564|YGD6_SCHPO Zinc-type alcohol dehydrogenase-like protein C1773.06c OS=Schizosaccharomyces pombe (strain 972 / ATCC 24843) GN=SPBC1773.06c PE=2 SV=1//1.81447e-22
CADAFLAG00004902	AFLA_111680	125.969	393.87	-1.6446	0.048782	sp|Q2UGQ2|EFGM_ASPOR Elongation factor G, mitochondrial OS=Aspergillus oryzae (strain ATCC 42149 / RIB 40) GN=mef1 PE=3 SV=1//0
CADAFLAG00004935	AFLA_112010	92.9827	746.675	-3.0054	0.00067562	sp|B5VKE8|SDHL_YEAS6 L-serine dehydratase OS=Saccharomyces cerevisiae (strain AWRI1631) GN=SDL1 PE=3 SV=1//5.0404e-51
CADAFLAG00005014	AFLA_112800	96.4975	13.84	2.8016	0.033744	sp|Q9HDX2|YKN3_SCHPO Uncharacterized lactate 2-monooxygenase PB1A11.03 OS=Schizosaccharomyces pombe (strain 972 / ATCC 24843) GN=SPAPB1A11.03 PE=2 SV=1//3.37605e-93
CADAFLAG00005025	AFLA_112910	2853.82	961.176	1.57	0.00010287	-//-
CADAFLAG00005114	AFLA_113800	199.097	592.211	-1.5726	0.044992	sp|P47176|BCA2_YEAST Branched-chain-amino-acid aminotransferase, cytosolic OS=Saccharomyces cerevisiae (strain ATCC 204508 / S288c) GN=BAT2 PE=1 SV=1//2.23699e-33
CADAFLAG00005144	AFLA_114100	5096.64	1375.59	1.8895	2.2205e-08	sp|Q9UTI9|YKZ2_SCHPO UPF0591 membrane protein C15E1.02c OS=Schizosaccharomyces pombe (strain 972 / ATCC 24843) GN=SPAC15E1.02c PE=2 SV=1//9.39285e-12
CADAFLAG00005154	AFLA_038260	1060.93	153.104	2.7927	1.3204e-10	-//-
CADAFLAG00005158	AFLA_038300	204.802	63.5807	1.6876	0.047952	sp|Q10487|MFS1_SCHPO Transporter mfs1 OS=Schizosaccharomyces pombe (strain 972 / ATCC 24843) GN=mfs1 PE=2 SV=1//1.47499e-46
CADAFLAG00005171	AFLA_038430	949.543	228.254	2.0566	8.657e-07	sp|Q5JJ82|MFNA_PYRKO L-tyrosine decarboxylase OS=Pyrococcus kodakaraensis (strain ATCC BAA-918 / JCM 12380 / KOD1) GN=mfnA PE=3 SV=1//3.47979e-13
CADAFLAG00005174	AFLA_038460	297.153	68.7441	2.1119	0.003699	sp|B8NQQ7|PLYC_ASPFN Probable pectate lyase C OS=Aspergillus flavus (strain ATCC 200026 / FGSC A1120 / NRRL 3357 / JCM 12722 / SRRC 167) GN=plyC PE=3 SV=1//6.47485e-28
CADAFLAG00005180	AFLA_038520	21.6601	252.79	-3.5448	0.0002514	-//-
CADAFLAG00005181	AFLA_038530	248.993	1965.85	-2.981	2.5061e-07	sp|Q2U1G7|NPI_ASPOR Extracellular metalloproteinase NpI OS=Aspergillus oryzae (strain ATCC 42149 / RIB 40) GN=NpI PE=2 SV=1//6.24859e-34
CADAFLAG00005199	AFLA_038710	16.4712	141.371	-3.1015	0.024901	-//-
CADAFLAG00005201	AFLA_038730	48.183	270.182	-2.4873	0.012221	sp|Q5AWB7|MANE_EMENI Probable mannan endo-1,4-beta-mannosidase E OS=Emericella nidulans (strain FGSC A4 / ATCC 38163 / CBS 112.46 / NRRL 194 / M139) GN=manE PE=3 SV=1//3.77218e-83
CADAFLAG00005207	AFLA_038790	391.651	2167.89	-2.4687	0.0057373	sp|Q2VQV9|CECR1_XENLA Adenosine deaminase CECR1 OS=Xenopus laevis GN=cecr1 PE=1 SV=1//7.48434e-44
CADAFLAG00005219	AFLA_038920	7.74242	131.374	-4.0847	0.0042282	-//-
CADAFLAG00005353	AFLA_040260	530.083	1848.07	-1.8017	0.0024053	-//-
CADAFLAG00005412	AFLA_040850	704.429	275.432	1.3548	0.0073873	-//-
CADAFLAG00005413	AFLA_040860	106.624	7.89059	3.7563	0.010627	-//-
CADAFLAG00005471	AFLA_041440	994.507	232.592	2.0962	2.4603e-07	-//-
CADAFLAG00005522	AFLA_041950	531.509	171.322	1.6334	0.014621	sp|P49426|EXG1_COCCA Glucan 1,3-beta-glucosidase OS=Cochliobolus carbonum GN=EXG1 PE=1 SV=1//2.72546e-80
CADAFLAG00005532	AFLA_042050	369.677	1161.61	-1.6518	0.0044455	sp|P32791|FRE1_YEAST Ferric/cupric reductase transmembrane component 1 OS=Saccharomyces cerevisiae (strain ATCC 204508 / S288c) GN=FRE1 PE=1 SV=1//3.55573e-14
CADAFLAG00005536	AFLA_042090	2274.15	483.354	2.2342	1.3851e-08	sp|Q62009|POSTN_MOUSE Periostin OS=Mus musculus GN=Postn PE=1 SV=2//2.09156e-06
CADAFLAG00005545	AFLA_042180	235.012	66.8029	1.8147	0.021935	-//-
CADAFLAG00005546	AFLA_042190	378.383	38.6278	3.2921	3.1996e-08	-//-
CADAFLAG00005547	AFLA_042200	212.376	17.2273	3.6239	3.8423e-05	-//-
CADAFLAG00005548	AFLA_042210	2919.58	193.013	3.919	4.8852e-27	-//-
CADAFLAG00005549	AFLA_042220	234.079	59.2424	1.9823	0.016556	sp|A2QX45|DCL22_ASPNC Dicer-like protein 2-2 OS=Aspergillus niger (strain CBS 513.88 / FGSC A1513) GN=dcl2-2 PE=3 SV=2//0
CADAFLAG00005564	AFLA_042370	186.833	4531.53	-4.6002	1.1922e-07	-//-
CADAFLAG00005581	AFLA_042540	165.448	17.0623	3.2775	0.0006087	-//-
CADAFLAG00005588	AFLA_042610	489.378	145.049	1.7544	0.0023532	-//-
CADAFLAG00005596	AFLA_042690	487.47	194.789	1.3234	0.033763	-//-
CADAFLAG00005600	AFLA_042730	493.93	106.091	2.219	6.3091e-05	-//-
CADAFLAG00005655	AFLA_043280	629.715	211.561	1.5736	0.0079985	sp|P77989|BGAL_THEP3 Beta-galactosidase OS=Thermoanaerobacter pseudethanolicus (strain ATCC 33223 / 39E) GN=lacZ PE=3 SV=2//3.71415e-20
CADAFLAG00005665	AFLA_043380	158.834	31.0673	2.3541	0.017444	sp|Q07651|FMP45_YEAST SUR7 family protein FMP45 OS=Saccharomyces cerevisiae (strain ATCC 204508 / S288c) GN=FMP45 PE=1 SV=1//3.00759e-27
CADAFLAG00005678	AFLA_043510	149.893	7.72557	4.2781	7.943e-05	sp|P34112|CDK1_DICDI Cyclin-dependent kinase 1 OS=Dictyostelium discoideum GN=cdk1 PE=2 SV=1//9.80828e-10
CADAFLAG00005785	AFLA_044580	963.117	134.101	2.8444	1.0812e-10	-//-
CADAFLAG00005806	AFLA_044790	258.692	20.2845	3.6728	2.1331e-06	sp|P10713|CON10_NEUCR Conidiation-specific protein 10 OS=Neurospora crassa (strain ATCC 24698 / 74-OR23-1A / CBS 708.71 / DSM 1257 / FGSC 987) GN=con-10 PE=2 SV=1//7.86127e-08
CADAFLAG00005807	AFLA_044800	144.772	1.61112	6.4896	9.6658e-06	-//-
CADAFLAG00005824	AFLA_044970	63.7722	3.05722	4.3826	0.035978	sp|Q2TZY0|PLYB_ASPOR Probable pectate lyase B OS=Aspergillus oryzae (strain ATCC 42149 / RIB 40) GN=plyB PE=3 SV=1//0
CADAFLAG00005854	AFLA_045270	2948.55	1357.94	1.1186	0.026795	sp|Q9Y757|CP52L_DEBHN Cytochrome P450 52A12 OS=Debaryomyces hansenii GN=CYP52A12 PE=2 SV=2//5.0013e-130
CADAFLAG00005872	AFLA_045450	74.3131	0		0.0031444	sp|P28584|TRK2_YEAST Low-affinity potassium transport protein OS=Saccharomyces cerevisiae (strain ATCC 204508 / S288c) GN=TRK2 PE=1 SV=1//1.2338e-12
CADAFLAG00006003	AFLA_046760	243.958	23.5068	3.3755	2.9599e-05	sp|Q7Z8E7|GPD_COLGL Glycerol-3-phosphate dehydrogenase [NAD(+)] OS=Colletotrichum gloeosporioides PE=2 SV=1//8.02189e-155
CADAFLAG00006035	AFLA_047080	614.899	1794.27	-1.545	0.0050972	sp|Q7S5N8|GLYM_NEUCR Putative serine hydroxymethyltransferase, mitochondrial OS=Neurospora crassa (strain ATCC 24698 / 74-OR23-1A / CBS 708.71 / DSM 1257 / FGSC 987) GN=NCU05805 PE=3 SV=1//1.72166e-17
CADAFLAG00006115	AFLA_055060	2046.68	5339.15	-1.3833	0.046829	sp|Q03134|FDH_EMENI Probable formate dehydrogenase OS=Emericella nidulans (strain FGSC A4 / ATCC 38163 / CBS 112.46 / NRRL 194 / M139) GN=aciA PE=2 SV=3//5.66125e-18
CADAFLAG00006226	AFLA_056170	1173.24	69.8602	4.0699	1.9271e-20	sp|P78574|CATA_ASPFU Catalase A OS=Neosartorya fumigata (strain ATCC MYA-4609 / Af293 / CBS 101355 / FGSC A1100) GN=catA PE=3 SV=2//1.66762e-20
CADAFLAG00006240	AFLA_056310	109.54	388.871	-1.8278	0.026161	sp|Q9P7K9|YOSF_SCHPO Putative aldehyde dehydrogenase-like protein C21C3 OS=Schizosaccharomyces pombe (strain 972 / ATCC 24843) GN=SPBC21C3.15c PE=2 SV=1//6.37695e-171
CADAFLAG00006253	AFLA_056440	1265.25	242.958	2.3806	2.9598e-08	-//-
CADAFLAG00006276	AFLA_056670	432.647	1208.02	-1.4814	0.042295	sp|P14010|GABAT_EMENI 4-aminobutyrate aminotransferase OS=Emericella nidulans (strain FGSC A4 / ATCC 38163 / CBS 112.46 / NRRL 194 / M139) GN=gatA PE=3 SV=1//0
CADAFLAG00006291	AFLA_056820	202.627	790.058	-1.9631	0.0065923	sp|Q9P885|GGPPS_MUCCL Geranylgeranyl pyrophosphate synthase OS=Mucor circinelloides f. lusitanicus GN=carG PE=1 SV=1//4.53295e-48
CADAFLAG00006324	AFLA_057150	262.759	20.2845	3.6953	1.5715e-06	sp|Q5MK11|CVNH_TUBBO Cyanovirin-N homolog OS=Tuber borchii PE=1 SV=1//5.00624e-10
CADAFLAG00006370	AFLA_057610	115.566	522.147	-2.1757	0.006786	sp|Q9P7F2|CAO1_SCHPO Copper amine oxidase 1 OS=Schizosaccharomyces pombe (strain 972 / ATCC 24843) GN=cao1 PE=1 SV=1//9.16172e-19
CADAFLAG00006407	AFLA_057980	750.033	203.301	1.8833	2.5868e-05	-//-
CADAFLAG00006427	AFLA_058180	101.605	7.72557	3.7172	0.0064197	sp|Q9RA05|LIMC_RHOER (-)-trans-carveol dehydrogenase OS=Rhodococcus erythropolis GN=limC PE=1 SV=1//1.42856e-15
CADAFLAG00006430	AFLA_058210	400.779	17.0623	4.5539	7.9973e-12	sp|P51853|BZNB_PSEFL Benzaldehyde lyase OS=Pseudomonas fluorescens GN=bznB PE=1 SV=1//3.53416e-57
CADAFLAG00006464	AFLA_058550	632.664	207.678	1.6071	0.0031095	sp|Q12753|HAA1_YEAST Transcriptional activator HAA1 OS=Saccharomyces cerevisiae (strain ATCC 204508 / S288c) GN=HAA1 PE=1 SV=1//1.89571e-11
CADAFLAG00006485	AFLA_058760	2542.94	543.469	2.2262	4.2678e-10	sp|B8NHY4|ORDA_ASPFN O-methylsterigmatocystin oxidoreductase OS=Aspergillus flavus (strain ATCC 200026 / FGSC A1120 / NRRL 3357 / JCM 12722 / SRRC 167) GN=ordA PE=2 SV=1//1.78431e-06
CADAFLAG00006566	AFLA_059570	15.3805	189.995	-3.6268	0.0011323	sp|Q01578|GNL_ZYMMO Gluconolactonase OS=Zymomonas mobilis subsp. mobilis (strain ATCC 31821 / ZM4 / CP4) GN=gnl PE=1 SV=2//1.25957e-14
CADAFLAG00006629	AFLA_060200	20.3101	147.65	-2.8619	0.03869	sp|P38680|MTR_NEUCR N amino acid transport system protein OS=Neurospora crassa (strain ATCC 24698 / 74-OR23-1A / CBS 708.71 / DSM 1257 / FGSC 987) GN=mtr PE=3 SV=2//5.86607e-24
CADAFLAG00006635	AFLA_060260	921.483	51.8469	4.1516	3.2267e-17	sp|P40920|HSP30_EMENI 30 kDa heat shock protein OS=Emericella nidulans (strain FGSC A4 / ATCC 38163 / CBS 112.46 / NRRL 194 / M139) GN=hsp30 PE=2 SV=1//1.74491e-64
CADAFLAG00006677	AFLA_060680	15.606	283.818	-4.1848	0.030286	sp|Q4WYG3|7DMAW_ASPFU 7-dimethylallyltryptophan synthase OS=Neosartorya fumigata (strain ATCC MYA-4609 / Af293 / CBS 101355 / FGSC A1100) GN=etpPT PE=1 SV=2//2.28796e-44
CADAFLAG00006790	AFLA_061810	345.242	1181.73	-1.7752	0.0022618	sp|O34918|YOAJ_BACSU Expansin-YoaJ OS=Bacillus subtilis (strain 168) GN=yoaJ PE=1 SV=1//8.814e-12
CADAFLAG00006845	AFLA_062360	1165.55	563.424	1.0487	0.036625	-//-
CADAFLAG00006855	AFLA_062460	172.742	43.6262	1.9853	0.04981	sp|Q12207|NCE2_YEAST Non-classical export protein 2 OS=Saccharomyces cerevisiae (strain ATCC 204508 / S288c) GN=NCE102 PE=1 SV=1//1.8961e-18
CADAFLAG00006864	AFLA_062550	71.5462	0		0.0042811	sp|O14111|PSD3_SCHPO Phosphatidylserine decarboxylase proenzyme 3 OS=Schizosaccharomyces pombe (strain 972 / ATCC 24843) GN=psd3 PE=2 SV=2//1.07708e-20
CADAFLAG00007016	AFLA_131370	808.453	356.28	1.1822	0.041932	sp|O14081|TPSX_SCHPO Putative alpha,alpha-trehalose-phosphate synthase [UDP-forming] 106 kDa subunit OS=Schizosaccharomyces pombe (strain 972 / ATCC 24843) GN=SPAC2E11.16c PE=1 SV=1//0
CADAFLAG00007019	AFLA_131400	763.243	1897.8	-1.3141	0.019477	-//-
CADAFLAG00007154	AFLA_132750	435.364	121.746	1.8383	0.017363	-//-
CADAFLAG00007166	AFLA_132870	1146.19	385.28	1.5729	0.0011097	sp|Q02979|GDE1_YEAST Glycerophosphodiester phosphodiesterase GDE1 OS=Saccharomyces cerevisiae (strain ATCC 204508 / S288c) GN=GDE1 PE=1 SV=1//9.26484e-37
CADAFLAG00007182	AFLA_133030	671.384	1574.94	-1.2301	0.040549	sp|P06809|COX4_NEUCR Cytochrome c oxidase subunit 4, mitochondrial OS=Neurospora crassa (strain ATCC 24698 / 74-OR23-1A / CBS 708.71 / DSM 1257 / FGSC 987) GN=cox-4 PE=3 SV=2//4.37677e-57
CADAFLAG00007241	AFLA_133620	8288.39	236.883	5.1288	1.0749e-45	-//-
CADAFLAG00007251	AFLA_133720	97.8139	4.66835	4.3891	0.0039384	-//-
CADAFLAG00007273	AFLA_133940	9320.72	1939.39	2.2648	1.8141e-09	sp|P0CL19|RPIB_COCIM Putative ribose 5-phosphate isomerase OS=Coccidioides immitis (strain RS) GN=CIMG_07932 PE=1 SV=1//9.39936e-84
CADAFLAG00007274	AFLA_133950	790.86	270.182	1.5495	0.0075487	sp|P0CL22|TPIS_COCIM Putative triosephosphate isomerase OS=Coccidioides immitis (strain RS) GN=CIMG_07933 PE=1 SV=1//8.20867e-125
CADAFLAG00007288	AFLA_134090	529.023	1306.66	-1.3045	0.039184	sp|P55251|LEUC_RHIPU 3-isopropylmalate dehydratase OS=Rhizomucor pusillus GN=LEUA PE=3 SV=1//0
CADAFLAG00007396	AFLA_135180	54.4398	0		0.029028	sp|P77851|HBD_THETC 3-hydroxybutyryl-CoA dehydrogenase OS=Thermoanaerobacterium thermosaccharolyticum (strain ATCC 7956 / DSM 571 / NCIB 9385 / NCA 3814) GN=hbd PE=3 SV=2//5.93739e-17
CADAFLAG00007411	AFLA_135330	975.053	380.116	1.359	0.0091007	sp|Q4X0S3|BTN1_ASPFU Protein btn1 OS=Neosartorya fumigata (strain ATCC MYA-4609 / Af293 / CBS 101355 / FGSC A1100) GN=btn1 PE=3 SV=1//2.44604e-12
CADAFLAG00007431	AFLA_135530	3906.87	1042.44	1.906	1.231e-07	sp|Q04336|YM54_YEAST Uncharacterized protein YMR196W OS=Saccharomyces cerevisiae (strain ATCC 204508 / S288c) GN=YMR196W PE=1 SV=1//0
CADAFLAG00007448	AFLA_135700	1133.48	4918.09	-2.1173	0.00024627	sp|O60022|AL15_ASPFU Allergen Asp f 15 OS=Neosartorya fumigata (strain ATCC MYA-4609 / Af293 / CBS 101355 / FGSC A1100) GN=AFUA_2G12630 PE=1 SV=1//1.89692e-44
CADAFLAG00007535	AFLA_136570	910.31	2873.18	-1.6582	0.0018094	sp|P56205|CYC_ASPNG Cytochrome c OS=Aspergillus niger GN=cycA PE=1 SV=1//5.75888e-66
CADAFLAG00007550	AFLA_136720	173.895	30.7373	2.5002	0.0023532	sp|O80739|POT12_ARATH Putative potassium transporter 12 OS=Arabidopsis thaliana GN=POT12 PE=1 SV=2//1.59359e-130
CADAFLAG00007622	AFLA_137440	2670.36	1086.64	1.2972	0.0050313	sp|P23751|H42_EMENI Histone H4.2 OS=Emericella nidulans (strain FGSC A4 / ATCC 38163 / CBS 112.46 / NRRL 194 / M139) GN=hhfB PE=3 SV=2//1.49042e-54
CADAFLAG00007623	AFLA_137450	936.684	162.15	2.5302	1.2522e-07	sp|Q5U2R5|PPR3C_RAT Protein phosphatase 1 regulatory subunit 3C OS=Rattus norvegicus GN=Ppp1r3c PE=2 SV=1//6.50206e-13
CADAFLAG00007634	AFLA_137560	2174.47	780.218	1.4787	0.0055202	sp|Q7S6U4|CVNH_NEUCR Cyanovirin-N homolog OS=Neurospora crassa (strain ATCC 24698 / 74-OR23-1A / CBS 708.71 / DSM 1257 / FGSC 987) GN=NCU05495 PE=1 SV=2//9.27453e-29
CADAFLAG00007648	AFLA_137710	218.912	31.2323	2.8092	0.00074836	-//-
CADAFLAG00007728	AFLA_138510	108.261	19.9545	2.4397	0.034782	sp|Q4UMH6|Y381_RICFE Putative ankyrin repeat protein RF_0381 OS=Rickettsia felis (strain ATCC VR-1525 / URRWXCal2) GN=RF_0381 PE=4 SV=1//7.68454e-07
CADAFLAG00007735	AFLA_138590	342.684	14.3351	4.5793	2.3247e-09	sp|Q9I4K0|HCHA_PSEAE Molecular chaperone Hsp31 and glyoxalase 3 OS=Pseudomonas aeruginosa (strain ATCC 15692 / PAO1 / 1C / PRS 101 / LMG 12228) GN=hchA PE=3 SV=1//1.21573e-11
CADAFLAG00007751	AFLA_138750	46.0014	319.923	-2.798	0.0028481	sp|Q01262|HYUA_PSESN Hydantoin utilization protein A OS=Pseudomonas sp. (strain NS671) GN=hyuA PE=3 SV=1//8.56647e-11
CADAFLAG00007753	AFLA_138770	188.151	588.203	-1.6444	0.025985	sp|Q08579|THI72_YEAST Thiamine transporter THI72 OS=Saccharomyces cerevisiae (strain ATCC 204508 / S288c) GN=THI72 PE=1 SV=1//1.8193e-08
CADAFLAG00007761	AFLA_138850	420.319	109.934	1.9348	0.00034718	sp|Q8VZ80|PLT5_ARATH Polyol transporter 5 OS=Arabidopsis thaliana GN=PLT5 PE=1 SV=2//1.68143e-53
CADAFLAG00007797	AFLA_139210	4260.68	1844.72	1.2077	0.011429	sp|P55790|OMTA_ASPFL Sterigmatocystin 8-O-methyltransferase OS=Aspergillus flavus GN=omtA PE=4 SV=1//0
CADAFLAG00007802	AFLA_139260	2788.53	1216.85	1.1964	0.032643	sp|Q12732|AVNA_ASPPA Averantin oxidoreductase OS=Aspergillus parasiticus GN=avnA PE=1 SV=2//0
CADAFLAG00007804	AFLA_139280	1486.37	652.444	1.1879	0.048269	sp|Q00714|STCS_EMENI Probable sterigmatocystin biosynthesis P450 monooxygenase stcS OS=Emericella nidulans (strain FGSC A4 / ATCC 38163 / CBS 112.46 / NRRL 194 / M139) GN=stcS PE=1 SV=2//1.38049e-79
CADAFLAG00007813	AFLA_139380	2865.34	1248.66	1.1983	0.019042	sp|Q00681|STCJ_EMENI Sterigmatocystin biosynthesis fatty acid synthase subunit alpha OS=Emericella nidulans (strain FGSC A4 / ATCC 38163 / CBS 112.46 / NRRL 194 / M139) GN=stcJ PE=3 SV=2//0
CADAFLAG00007815	AFLA_139400	2083.85	978.937	1.09	0.048782	-//-
CADAFLAG00007816	AFLA_139410	8671.94	3822.42	1.1819	0.010141	sp|Q12053|PKSL1_ASPPA Aflatoxin biosynthesis polyketide synthase OS=Aspergillus parasiticus GN=pksL1 PE=1 SV=1//0
CADAFLAG00007817	AFLA_139420	1410.41	546.479	1.3679	0.0091007	sp|Q00357|TOXA_COCCA Putative HC-toxin efflux carrier TOXA OS=Cochliobolus carbonum GN=TOXA PE=3 SV=1//5.05389e-15
CADAFLAG00007875	AFLA_064500	139.483	482.859	-1.7915	0.044095	-//-
CADAFLAG00007897	AFLA_064720	170.838	7.89059	4.4363	4.016e-05	sp|P39932|STL1_YEAST Sugar transporter STL1 OS=Saccharomyces cerevisiae (strain ATCC 204508 / S288c) GN=STL1 PE=1 SV=2//4.05918e-102
CADAFLAG00007943	AFLA_065190	69.1762	302.24	-2.1273	0.018674	sp|P87037|XYNB_ASPOR Probable endo-1,4-beta-xylanase B OS=Aspergillus oryzae (strain ATCC 42149 / RIB 40) GN=xlnB PE=1 SV=1//2.11686e-143
CADAFLAG00007946	AFLA_065220	135.314	30.9023	2.1305	0.042853	-//-
CADAFLAG00007952	AFLA_065280	1426.21	128.442	3.473	1.3196e-18	sp|Q8J130|TYRO_ASPFU Tyrosinase OS=Neosartorya fumigata (strain ATCC MYA-4609 / Af293 / CBS 101355 / FGSC A1100) GN=tyr1 PE=3 SV=2//1.49875e-130
CADAFLAG00007978	AFLA_065540	277.68	1218.05	-2.1331	0.00050015	sp|O59952|LIP_THELA Lipase OS=Thermomyces lanuginosus GN=LIP PE=1 SV=1//8.32141e-15
CADAFLAG00008005	AFLA_065810	265.622	55.7292	2.2529	0.023437	sp|B5BP49|YP55_SCHPO Uncharacterized transporter C460.05 OS=Schizosaccharomyces pombe (strain 972 / ATCC 24843) GN=SPBC460.05 PE=3 SV=1//6.2784e-90
CADAFLAG00008049	AFLA_066250	276.16	78.2458	1.8194	0.027014	-//-
CADAFLAG00008122	AFLA_066980	738.479	277.248	1.4134	0.015349	sp|Q0C8M3|LNKS_ASPTN Lovastatin nonaketide synthase OS=Aspergillus terreus (strain NIH 2624 / FGSC A1156) GN=lovB PE=3 SV=2//2.2475e-104
CADAFLAG00008169	AFLA_067450	326.155	1366.53	-2.0669	0.00044061	sp|Q4L4R5|GCSH_STAHJ Glycine cleavage system H protein OS=Staphylococcus haemolyticus (strain JCSC1435) GN=gcvH PE=3 SV=1//7.72924e-32
CADAFLAG00008178	AFLA_067540	460.437	172.273	1.4183	0.046829	sp|O59806|YJV8_SCHPO Uncharacterized N-acetyltransferase C550.08 OS=Schizosaccharomyces pombe (strain 972 / ATCC 24843) GN=SPCC550.08 PE=2 SV=1//4.245e-07
CADAFLAG00008200	AFLA_067760	364.485	61.0185	2.5785	6.6857e-05	-//-
CADAFLAG00008214	AFLA_067900	319.681	75.6837	2.0786	0.0097291	-//-
CADAFLAG00008308	AFLA_068840	189.813	829.133	-2.127	0.03939	sp|P49364|GCST_PEA Aminomethyltransferase, mitochondrial OS=Pisum sativum GN=GDCST PE=1 SV=2//2.80524e-10
CADAFLAG00008390	AFLA_069660	1160.33	502.523	1.2073	0.046829	sp|P55607|Y4OV_RHISN Uncharacterized protein y4oV OS=Rhizobium sp. (strain NGR234) GN=NGR_a02140 PE=4 SV=1//3.04095e-109
CADAFLAG00008425	AFLA_070010	1753.95	708.724	1.3073	0.035465	-//-
CADAFLAG00008509	AFLA_070850	94.4683	12.3939	2.9302	0.042436	sp|O14111|PSD3_SCHPO Phosphatidylserine decarboxylase proenzyme 3 OS=Schizosaccharomyces pombe (strain 972 / ATCC 24843) GN=psd3 PE=2 SV=2//1.97111e-24
CADAFLAG00008521	AFLA_070970	108.539	9.33669	3.5392	0.0080375	-//-
CADAFLAG00008533	AFLA_071090	5695.6	2397.74	1.2482	0.0022295	-//-
CADAFLAG00008581	AFLA_071570	337.771	99.1513	1.7683	0.0037118	sp|P36013|MAOM_YEAST NAD-dependent malic enzyme, mitochondrial OS=Saccharomyces cerevisiae (strain ATCC 204508 / S288c) GN=MAE1 PE=1 SV=1//0
CADAFLAG00008627	AFLA_089410	8.35682	121.251	-3.8589	0.004042	-//-
CADAFLAG00008663	AFLA_089770	56.5878	513.305	-3.1813	1.9064e-05	sp|Q2U790|ABFA_ASPOR Probable alpha-N-arabinofuranosidase A OS=Aspergillus oryzae (strain ATCC 42149 / RIB 40) GN=abfA PE=3 SV=2//4.14481e-19
CADAFLAG00008691	AFLA_090060	79.537	370.819	-2.221	0.0097725	sp|P24665|PRTA_ASPNG Aspergillopepsin-2 OS=Aspergillus niger PE=1 SV=1//4.16916e-95
CADAFLAG00008744	AFLA_090590	161.087	557.796	-1.7919	0.042183	sp|O86365|Y584_MYCTU Uncharacterized glycosidase Rv0584 OS=Mycobacterium tuberculosis GN=Rv0584 PE=3 SV=1//2.04389e-51
CADAFLAG00008785	AFLA_091000	283.405	77.9158	1.8629	0.011691	sp|O13317|TRI11_FUSSP Isotrichodermin C-15 hydroxylase OS=Fusarium sporotrichioides GN=TRI11 PE=3 SV=1//1.0148e-65
CADAFLAG00008818	AFLA_091330	361.767	76.3047	2.2452	0.00031778	-//-
CADAFLAG00008955	AFLA_092700	2310.95	923.373	1.3235	0.0043525	sp|P38148|PPS1_YEAST Dual specificity protein phosphatase PPS1 OS=Saccharomyces cerevisiae (strain ATCC 204508 / S288c) GN=PPS1 PE=1 SV=1//6.24416e-44
CADAFLAG00009051	AFLA_093660	1012.73	262.213	1.9494	1.6687e-06	-//-
CADAFLAG00009077	AFLA_093920	204.432	0		1.9414e-09	-//-
CADAFLAG00009084	AFLA_093990	1023.34	344.381	1.5712	0.0014277	sp|P51691|ARS_PSEAE Arylsulfatase OS=Pseudomonas aeruginosa (strain ATCC 15692 / PAO1 / 1C / PRS 101 / LMG 12228) GN=atsA PE=1 SV=3//1.28313e-16
CADAFLAG00009086	AFLA_094010	377.939	120.921	1.6441	0.034922	sp|P16951|ATF2_MOUSE Cyclic AMP-dependent transcription factor ATF-2 OS=Mus musculus GN=Atf2 PE=1 SV=2//2.30167e-10
CADAFLAG00009094	AFLA_094090	185.947	15.6162	3.5738	0.00013993	-//-
CADAFLAG00009103	AFLA_094180	510.751	52.9629	3.2696	2.7664e-09	-//-
CADAFLAG00009112	AFLA_094270	0.6896	47.0135	-6.0912	0.0099221	-//-
CADAFLAG00009147	AFLA_094620	928.11	338.926	1.4533	0.0088025	-//-
CADAFLAG00009170	AFLA_094850	163.022	637.614	-1.9676	0.0065454	sp|B4SHV9|BETA_STRM5 Choline dehydrogenase OS=Stenotrophomonas maltophilia (strain R551-3) GN=betA PE=3 SV=1//4.04775e-25
CADAFLAG00009179	AFLA_094940	250.91	24.7878	3.3395	7.1923e-06	-//-
CADAFLAG00009180	AFLA_094950	436.643	15.9462	4.7752	8.4476e-12	sp|Q9HFE4|FMO1_SCHPO Thiol-specific monooxygenase OS=Schizosaccharomyces pombe (strain 972 / ATCC 24843) GN=fmo1 PE=1 SV=1//1.1473e-30
CADAFLAG00009181	AFLA_094960	175.613	11.1128	3.9821	0.00017572	sp|Q12645|PID9_FUSSO Pisatin demethylase OS=Fusarium solani subsp. pisi GN=PDAT9 PE=3 SV=1//5.63741e-23
CADAFLAG00009183	AFLA_094980	5799.86	215.482	4.7504	8.7032e-38	-//-
CADAFLAG00009184	AFLA_094990	623.205	29.9512	4.379	2.6036e-14	-//-
CADAFLAG00009186	AFLA_095010	240.473	21.7306	3.4681	7.9442e-06	-//-
CADAFLAG00009187	AFLA_095020	399.851	29.7862	3.7467	6.4197e-09	-//-
CADAFLAG00009189	AFLA_095040	422.091	18.6734	4.4985	5.8943e-12	sp|Q9HMM6|CSD_HALSA Probable cysteine desulfurase OS=Halobacterium salinarum (strain ATCC 700922 / JCM 11081 / NRC-1) GN=csd PE=3 SV=1//7.80691e-28
CADAFLAG00009190	AFLA_095050	613.079	28.1751	4.4436	5.8904e-15	sp|Q9HFE4|FMO1_SCHPO Thiol-specific monooxygenase OS=Schizosaccharomyces pombe (strain 972 / ATCC 24843) GN=fmo1 PE=1 SV=1//1.88167e-47
CADAFLAG00009191	AFLA_095060	313.035	18.8384	4.0546	4.2058e-08	sp|P55023|TYRO_STRLN Tyrosinase OS=Streptomyces lincolnensis GN=melC2 PE=3 SV=2//4.42916e-21
CADAFLAG00009192	AFLA_095070	596.047	85.3504	2.804	7.2512e-07	-//-
CADAFLAG00009193	AFLA_095080	174.485	19.0034	3.1988	0.002532	-//-
CADAFLAG00009194	AFLA_095090	282.709	36.3957	2.9575	0.00020513	-//-
CADAFLAG00009195	AFLA_095100	438.53	37.5118	3.5473	4.502e-09	-//-
CADAFLAG00009196	AFLA_095110	182.553	7.89059	4.532	1.4236e-05	-//-
CADAFLAG00009329	AFLA_096450	68.6602	1146.7	-4.0619	0.0020372	-//-
CADAFLAG00009351	AFLA_096670	104.675	3.05722	5.0975	0.00056189	-//-
CADAFLAG00009416	AFLA_123580	108.816	453.568	-2.0594	0.01351	-//-
CADAFLAG00009524	AFLA_124660	383.386	3479.89	-3.1822	4.2678e-10	sp|Q2UCT7|PELC_ASPOR Probable pectin lyase C OS=Aspergillus oryzae (strain ATCC 42149 / RIB 40) GN=pelC PE=3 SV=1//2.73688e-62
CADAFLAG00009547	AFLA_124890	67.7638	3.05722	4.4702	0.024049	-//-
CADAFLAG00009556	AFLA_124980	286.808	2086.52	-2.8629	2.7092e-07	sp|P20370|DC4C_ACIAD 4-carboxymuconolactone decarboxylase OS=Acinetobacter sp. (strain ADP1) GN=pcaC PE=4 SV=2//9.83574e-28
CADAFLAG00009557	AFLA_124990	341.054	5521.92	-4.0171	3.0892e-16	-//-
CADAFLAG00009558	AFLA_125000	295.473	1228.29	-2.0556	0.0044223	sp|O59700|YN43_SCHPO Uncharacterized transporter C36.03c OS=Schizosaccharomyces pombe (strain 972 / ATCC 24843) GN=SPBC36.03c PE=2 SV=1//6.96137e-135
CADAFLAG00009567	AFLA_125090	233.642	1253.78	-2.4239	0.047161	sp|P86029|HQD2_CANAL Catechol 1,2-dioxygenase OS=Candida albicans (strain SC5314 / ATCC MYA-2876) GN=HQD2 PE=1 SV=1//1.25975e-16
CADAFLAG00009624	AFLA_125660	586.001	20.1195	4.8642	8.6308e-17	sp|P17326|AT1A_ARTSF Sodium/potassium-transporting ATPase subunit alpha-A OS=Artemia franciscana PE=2 SV=1//1.21237e-148
CADAFLAG00009648	AFLA_125900	363.557	3486.1	-3.2614	3.1758e-10	sp|B8NWE1|NPIIB_ASPFN Neutral protease 2 homolog AFLA_119780 OS=Aspergillus flavus (strain ATCC 200026 / FGSC A1120 / NRRL 3357 / JCM 12722 / SRRC 167) GN=AFLA_119780 PE=3 SV=1//1.58721e-19
CADAFLAG00009671	AFLA_126130	357.538	17.0623	4.3892	1.9002e-10	sp|A2Y5L9|PDC1_ORYSI Pyruvate decarboxylase isozyme 1 OS=Oryza sativa subsp. indica GN=PDC1 PE=2 SV=1//3.41924e-100
CADAFLAG00009684	AFLA_126260	1730.2	367.062	2.2368	1.046e-08	sp|Q07WU7|FRDA_SHEFN Fumarate reductase flavoprotein subunit OS=Shewanella frigidimarina (strain NCIMB 400) GN=fccA PE=1 SV=2//2.77133e-20
CADAFLAG00009697	AFLA_126390	1128.14	3318.25	-1.5565	0.0062051	sp|Q01284|2NPD_NEUCR Nitronate monooxygenase OS=Neurospora crassa (strain ATCC 24698 / 74-OR23-1A / CBS 708.71 / DSM 1257 / FGSC 987) GN=ncd-2 PE=1 SV=1//1.52879e-11
CADAFLAG00009712	AFLA_126540	12.2416	149.921	-3.6143	0.014074	-//-
CADAFLAG00009716	AFLA_126580	140.309	21.8956	2.6799	0.019983	sp|P23342|MSOX_BACSN Monomeric sarcosine oxidase OS=Bacillus sp. (strain NS-129) GN=soxA PE=1 SV=1//2.23016e-51
CADAFLAG00009720	AFLA_126620	774.946	246.345	1.6534	0.0027442	sp|Q12612|TRI4_FUSSP Trichodiene oxygenase OS=Fusarium sporotrichioides GN=TRI4 PE=3 SV=1//2.52656e-10
CADAFLAG00009748	AFLA_126900	685.833	60.5235	3.5023	1.1907e-12	sp|Q02751|MALT_CANAX Alpha-glucosidase OS=Candida albicans GN=MAL2 PE=1 SV=4//0
CADAFLAG00009779	AFLA_127210	14317	6541.3	1.1301	0.016656	-//-
CADAFLAG00009820	AFLA_127620	284.659	40.239	2.8226	2.4574e-05	-//-
CADAFLAG00009825	AFLA_127670	426.073	45.4024	3.2303	1.0291e-07	sp|Q7T3C7|RT4I1_DANRE Reticulon-4-interacting protein 1 homolog, mitochondrial OS=Danio rerio GN=rtn4ip1 PE=2 SV=2//5.62208e-13
CADAFLAG00009851	AFLA_127930	287.49	1258.42	-2.13	0.00086195	sp|B8NNI2|GANA_ASPFN Probable arabinogalactan endo-1,4-beta-galactosidase A OS=Aspergillus flavus (strain ATCC 200026 / FGSC A1120 / NRRL 3357 / JCM 12722 / SRRC 167) GN=galA PE=3 SV=1//2.67088e-56
CADAFLAG00009909	AFLA_128510	310.526	11.1128	4.8044	2.9259e-09	sp|C8VP36|6PGD_EMENI 6-phosphogluconate dehydrogenase, decarboxylating OS=Emericella nidulans (strain FGSC A4 / ATCC 38163 / CBS 112.46 / NRRL 194 / M139) GN=AN10233 PE=3 SV=1//0
CADAFLAG00009910	AFLA_128520	172.538	9.50172	4.1826	9.4128e-05	sp|P07046|3SHD_NEUCR 3-dehydroshikimate dehydratase OS=Neurospora crassa (strain ATCC 24698 / 74-OR23-1A / CBS 708.71 / DSM 1257 / FGSC 987) GN=qa-4 PE=4 SV=1//2.03565e-47
CADAFLAG00009912	AFLA_128540	133.653	498.805	-1.9	0.023492	sp|Q86H28|PROD_DICDI Proline dehydrogenase 1, mitochondrial OS=Dictyostelium discoideum GN=prodh PE=3 SV=1//4.02685e-30
CADAFLAG00009935	AFLA_128770	254.97	53.293	2.2583	0.0056558	-//-
CADAFLAG00010037	AFLA_129790	1540.32	651.25	1.2419	0.012311	-//-
CADAFLAG00010152	AFLA_000860	1421.7	3667.21	-1.3671	0.017067	sp|Q4WQU0|SED4_ASPFU Tripeptidyl-peptidase sed4 OS=Neosartorya fumigata (strain ATCC MYA-4609 / Af293 / CBS 101355 / FGSC A1100) GN=sed4 PE=1 SV=1//0
CADAFLAG00010153	AFLA_000870	85.7939	0		0.00085999	-//-
CADAFLAG00010167	AFLA_001010	48.9309	391.142	-2.9989	0.018848	sp|P23295|NOR_FUSOX NADP nitrous oxide-forming nitric oxide reductase OS=Fusarium oxysporum GN=CYP55A1 PE=1 SV=2//2.13906e-06
CADAFLAG00010169	AFLA_001030	76.271	1.61112	5.565	0.011718	sp|Q96WJ0|ERG7_PNECA Lanosterol synthase OS=Pneumocystis carinii GN=ERG7 PE=2 SV=1//0
CADAFLAG00010202	AFLA_001360	239.205	12.5589	4.2515	7.8012e-07	sp|Q9N4X8|GSTPA_CAEEL Glutathione S-transferase P 10 OS=Caenorhabditis elegans GN=gst-10 PE=1 SV=3//2.46528e-13
CADAFLAG00010212	AFLA_001460	75.3831	353.882	-2.231	0.025731	sp|P27526|PHR_NEUCR Deoxyribodipyrimidine photo-lyase OS=Neurospora crassa (strain ATCC 24698 / 74-OR23-1A / CBS 708.71 / DSM 1257 / FGSC 987) GN=phr-1 PE=3 SV=1//1.08513e-12
CADAFLAG00010255	AFLA_001890	237.64	1811.95	-2.9307	4.7607e-08	sp|Q01738|CDH_PHACH Cellobiose dehydrogenase OS=Phanerochaete chrysosporium GN=CDH-1 PE=1 SV=1//7.746e-13
CADAFLAG00010351	AFLA_002850	95.5507	3.22225	4.8901	0.0055607	sp|Q7FAX1|PXG_ORYSJ Peroxygenase OS=Oryza sativa subsp. japonica GN=PXG PE=2 SV=1//2.59798e-06
CADAFLAG00010352	AFLA_002860	198.272	14.005	3.8235	2.1958e-05	sp|Q6DF30|DHDH_XENTR Trans-1,2-dihydrobenzene-1,2-diol dehydrogenase OS=Xenopus tropicalis GN=dhdh PE=2 SV=1//1.62593e-21
CADAFLAG00010364	AFLA_002980	80.8331	434.69	-2.427	0.0089302	sp|Q64380|SARDH_RAT Sarcosine dehydrogenase, mitochondrial OS=Rattus norvegicus GN=Sardh PE=1 SV=2//2.47924e-21
CADAFLAG00010382	AFLA_003160	117.873	20.1195	2.5506	0.03235	-//-
CADAFLAG00010447	AFLA_003810	273.848	955.265	-1.8025	0.0082113	sp|P64744|Y912_MYCBO Uncharacterized protein Mb0912 OS=Mycobacterium bovis (strain ATCC BAA-935 / AF2122/97) GN=Mb0912 PE=4 SV=1//1.0203e-08
CADAFLAG00010459	AFLA_003930	155.796	22.2257	2.8094	0.021171	sp|P27968|NIA7_HORVU Nitrate reductase [NAD(P)H] OS=Hordeum vulgare GN=NAR-7 PE=2 SV=1//2.3141e-16
CADAFLAG00010475	AFLA_004090	1931.27	866.198	1.1568	0.022264	-//-
CADAFLAG00010486	AFLA_004200	41.9513	283.236	-2.7552	0.0024693	-//-
CADAFLAG00010501	AFLA_004350	20557.7	3113.51	2.7231	7.9861e-17	sp|A9VHW5|PSD_BACWK Phosphatidylserine decarboxylase proenzyme OS=Bacillus weihenstephanensis (strain KBAB4) GN=psd PE=3 SV=1//2.39524e-13
CADAFLAG00010531	AFLA_004650	4666.24	2264	1.0434	0.028319	sp|P42882|NMT1_ASPPA Protein NMT1 homolog OS=Aspergillus parasiticus GN=nmt1 PE=2 SV=1//4.60898e-25
CADAFLAG00010535	AFLA_004690	297.632	77.4207	1.9427	0.002532	-//-
CADAFLAG00010561	AFLA_004950	765.92	1875.74	-1.2922	0.022463	sp|Q01359|COX6_NEUCR Cytochrome c oxidase subunit 6, mitochondrial OS=Neurospora crassa (strain ATCC 24698 / 74-OR23-1A / CBS 708.71 / DSM 1257 / FGSC 987) GN=cox-6 PE=3 SV=2//1.50188e-07
CADAFLAG00010571	AFLA_005050	131.361	21.8956	2.5848	0.035502	-//-
CADAFLAG00010613	AFLA_005480	563.333	191.897	1.5537	0.005818	sp|Q13423|NNTM_HUMAN NAD(P) transhydrogenase, mitochondrial OS=Homo sapiens GN=NNT PE=1 SV=3//5.92639e-08
CADAFLAG00010637	AFLA_005720	3198.99	1199.25	1.4155	0.0021022	-//-
CADAFLAG00010664	AFLA_005990	199.17	44.1213	2.1745	0.040622	-//-
CADAFLAG00010676	AFLA_006110	864.952	356.319	1.2795	0.041932	-//-
CADAFLAG00010682	AFLA_006170	234.533	50.2358	2.223	0.011724	sp|Q03149|WA_EMENI Conidial yellow pigment biosynthesis polyketide synthase OS=Emericella nidulans (strain FGSC A4 / ATCC 38163 / CBS 112.46 / NRRL 194 / M139) GN=wA PE=1 SV=2//6.35129e-16
CADAFLAG00010736	AFLA_006730	188.897	21.7306	3.1198	0.00037183	sp|O06012|ADHB_BACSU Uncharacterized zinc-type alcohol dehydrogenase-like protein AdhB OS=Bacillus subtilis (strain 168) GN=adhB PE=3 SV=2//1.03412e-14
CADAFLAG00010737	AFLA_006740	193.528	30.2813	2.676	0.015855	sp|O13716|AGN1_SCHPO Glucan endo-1,3-alpha-glucosidase agn1 OS=Schizosaccharomyces pombe (strain 972 / ATCC 24843) GN=agn1 PE=1 SV=2//5.18131e-34
CADAFLAG00010765	AFLA_007020	1368.14	3172.48	-1.2134	0.047789	sp|P51044|CISY_ASPNG Citrate synthase, mitochondrial OS=Aspergillus niger GN=cit-1 PE=2 SV=1//5.91458e-07
CADAFLAG00010768	AFLA_007050	2654.9	755.816	1.8126	6.1758e-07	-//-
CADAFLAG00010836	AFLA_048440	266.134	3.05722	6.4438	5.4632e-11	-//-
CADAFLAG00010899	AFLA_049070	105.168	15.4511	2.7669	0.031139	sp|Q12691|ATN5_YEAST Sodium transport ATPase 5 OS=Saccharomyces cerevisiae (strain ATCC 204508 / S288c) GN=ENA5 PE=1 SV=1//0
CADAFLAG00010915	AFLA_049230	224.306	29.6212	2.9208	0.00031778	sp|B6HI95|LAD_PENCW L-arabinitol 4-dehydrogenase OS=Penicillium chrysogenum (strain ATCC 28089 / DSM 1075 / Wisconsin 54-1255) GN=lad1 PE=1 SV=1//9.58084e-129
CADAFLAG00010949	AFLA_049570	79.7819	0		0.0017534	sp|O74923|YJ7D_SCHPO Uncharacterized transporter C757.13 OS=Schizosaccharomyces pombe (strain 972 / ATCC 24843) GN=SPCC757.13 PE=2 SV=1//9.47711e-15
CADAFLAG00010950	AFLA_049580	169.024	20.2845	3.0588	0.0017826	sp|O34371|YTET_BACSU Putative oxidoreductase YteT OS=Bacillus subtilis (strain 168) GN=yteT PE=2 SV=1//7.83372e-75
CADAFLAG00010984	AFLA_049920	1719.58	716.645	1.2627	0.012715	sp|O14359|YB4E_SCHPO Uncharacterized AIM2 family protein C30D10.14 OS=Schizosaccharomyces pombe (strain 972 / ATCC 24843) GN=SPBC30D10.14 PE=2 SV=1//1.80621e-31
CADAFLAG00011013	AFLA_050210	277.209	85.9714	1.689	0.041977	-//-
CADAFLAG00011051	AFLA_050590	141.443	17.2273	3.0375	0.0075487	-//-
CADAFLAG00011061	AFLA_050690	9183.51	19426.3	-1.0809	0.041035	sp|Q09188|ADT_SCHPO ADP,ATP carrier protein OS=Schizosaccharomyces pombe (strain 972 / ATCC 24843) GN=anc1 PE=2 SV=1//7.52162e-50
CADAFLAG00011107	AFLA_051160	249.069	46.8485	2.4105	0.0021022	-//-
CADAFLAG00011127	AFLA_051360	2718.01	238.581	3.51	6.515e-22	sp|Q10327|YD72_SCHPO Uncharacterized protein C32A11.02c OS=Schizosaccharomyces pombe (strain 972 / ATCC 24843) GN=SPAC32A11.02c PE=2 SV=1//1.06249e-08
CADAFLAG00011180	AFLA_051890	3185.88	1160.67	1.4567	0.00046374	sp|P39932|STL1_YEAST Sugar transporter STL1 OS=Saccharomyces cerevisiae (strain ATCC 204508 / S288c) GN=STL1 PE=1 SV=2//4.18615e-06
CADAFLAG00011184	AFLA_051930	7224.36	3571.3	1.0164	0.027144	sp|Q96V52|GLNA_EMENI Glutamine synthetase OS=Emericella nidulans (strain FGSC A4 / ATCC 38163 / CBS 112.46 / NRRL 194 / M139) GN=glnA PE=3 SV=3//6.86458e-07
CADAFLAG00011223	AFLA_052320	818.086	377.515	1.1157	0.046358	sp|Q4WZS3|Y5950_ASPFU Putative aspergillopepsin A-like aspartic endopeptidase AFUA_2G15950 OS=Neosartorya fumigata (strain ATCC MYA-4609 / Af293 / CBS 101355 / FGSC A1100) GN=AFUA_2G15950 PE=3 SV=2//1.03807e-22
CADAFLAG00011233	AFLA_052420	174.871	31.2323	2.4852	0.010957	sp|P28584|TRK2_YEAST Low-affinity potassium transport protein OS=Saccharomyces cerevisiae (strain ATCC 204508 / S288c) GN=TRK2 PE=1 SV=1//1.62184e-105
CADAFLAG00011272	AFLA_052810	1444.72	63.0856	4.5173	4.5984e-27	sp|P0C956|GEL4_ASPFU 1,3-beta-glucanosyltransferase gel4 OS=Neosartorya fumigata (strain ATCC MYA-4609 / Af293 / CBS 101355 / FGSC A1100) GN=gel4 PE=3 SV=1//1.37232e-180
CADAFLAG00011277	AFLA_052860	17500.1	2636.68	2.7306	9.3997e-20	sp|P50519|HSP9_SCHPO Heat shock protein hsp9 OS=Schizosaccharomyces pombe (strain 972 / ATCC 24843) GN=hsp9 PE=2 SV=1//5.65606e-13
CADAFLAG00011306	AFLA_053160	4853.09	15264.4	-1.6532	0.0013052	sp|O67890|FMT_AQUAE Methionyl-tRNA formyltransferase OS=Aquifex aeolicus (strain VF5) GN=fmt PE=3 SV=1//8.19507e-09
CADAFLAG00011316	AFLA_053260	541.132	127.735	2.0828	0.019477	-//-
CADAFLAG00011323	AFLA_053330	683.434	2049.96	-1.5847	0.009127	-//-
CADAFLAG00011354	AFLA_053640	1246	107.372	3.5366	3.559e-17	sp|P08159|HDNO_ARTOX 6-hydroxy-D-nicotine oxidase OS=Arthrobacter oxidans PE=1 SV=2//1.42639e-18
CADAFLAG00011356	AFLA_053660	1174.62	448.279	1.3897	0.014911	-//-
CADAFLAG00011360	AFLA_053700	2822.8	875.235	1.6894	0.00031935	-//-
CADAFLAG00011439	AFLA_054490	30.7337	320.127	-3.3808	0.0060663	sp|P38680|MTR_NEUCR N amino acid transport system protein OS=Neurospora crassa (strain ATCC 24698 / 74-OR23-1A / CBS 708.71 / DSM 1257 / FGSC 987) GN=mtr PE=3 SV=2//3.23201e-59
CADAFLAG00011490	AFLA_097520	1.75121	53.293	-4.9275	0.041978	sp|P36619|PMD1_SCHPO Leptomycin B resistance protein pmd1 OS=Schizosaccharomyces pombe (strain 972 / ATCC 24843) GN=pmd1 PE=2 SV=2//1.68755e-74
CADAFLAG00011508	AFLA_097700	197.816	6.11445	5.0158	1.8516e-07	sp|O29003|Y1265_ARCFU UPF0173 metal-dependent hydrolase AF_1265 OS=Archaeoglobus fulgidus (strain ATCC 49558 / VC-16 / DSM 4304 / JCM 9628 / NBRC 100126) GN=AF_1265 PE=3 SV=1//1.91387e-16
CADAFLAG00011513	AFLA_097750	27558.9	5108.26	2.4316	9.4229e-12	-//-
CADAFLAG00011527	AFLA_097890	379.006	2343.8	-2.6286	0.040549	sp|O33833|BFRA_THEMA Beta-fructosidase OS=Thermotoga maritima (strain ATCC 43589 / MSB8 / DSM 3109 / JCM 10099) GN=bfrA PE=1 SV=1//2.78802e-11
CADAFLAG00011576	AFLA_098380	1059.28	331.774	1.6748	0.023224	sp|P28346|RODL_EMENI Rodlet protein OS=Emericella nidulans (strain FGSC A4 / ATCC 38163 / CBS 112.46 / NRRL 194 / M139) GN=rodA PE=2 SV=1//7.33865e-13
CADAFLAG00011605	AFLA_098670	1527.3	484.344	1.6569	0.00055101	sp|Q01306|CCG8_NEUCR Clock-controlled protein 8 OS=Neurospora crassa (strain ATCC 24698 / 74-OR23-1A / CBS 708.71 / DSM 1257 / FGSC 987) GN=ccg-8 PE=2 SV=3//2.34583e-35
CADAFLAG00011608	AFLA_098700	6111.27	2520.92	1.2775	0.0034434	sp|P0C0Y5|MTDH_DAVTA Probable NADP-dependent mannitol dehydrogenase OS=Davidiella tassiana PE=1 SV=1//1.45914e-23
CADAFLAG00011643	AFLA_099050	163.821	37.5118	2.1267	0.049934	-//-
CADAFLAG00011762	AFLA_100250	13.2656	208.504	-3.9743	0.00019867	sp|Q5RF10|CATA_PONAB Catalase OS=Pongo abelii GN=CAT PE=2 SV=3//2.10066e-145
CADAFLAG00011763	AFLA_100260	202.689	970.795	-2.2599	0.00016101	-//-
CADAFLAG00011818	AFLA_100810	284.77	84.1953	1.758	0.020441	-//-
CADAFLAG00011862	AFLA_101250	184.219	11.1128	4.0511	8.7567e-05	sp|Q92247|BLI4_NEUCR Putative oxidoreductase bli-4, mitochondrial OS=Neurospora crassa (strain ATCC 24698 / 74-OR23-1A / CBS 708.71 / DSM 1257 / FGSC 987) GN=bli-4 PE=1 SV=1//1.91947e-11
CADAFLAG00011868	AFLA_101310	120.998	457.12	-1.9176	0.019477	sp|Q07904|THI73_YEAST Thiamine pathway transporter THI73 OS=Saccharomyces cerevisiae (strain ATCC 204508 / S288c) GN=THI73 PE=1 SV=1//1.03884e-72
CADAFLAG00011874	AFLA_101370	307.575	76.1396	2.0142	0.002461	sp|O64518|MCA5_ARATH Metacaspase-5 OS=Arabidopsis thaliana GN=AMC5 PE=1 SV=1//3.31041e-10
CADAFLAG00011891	AFLA_101540	161.248	29.7862	2.4366	0.026081	-//-
CADAFLAG00011900	AFLA_101630	443.086	57.3012	2.9509	7.7321e-08	-//-
CADAFLAG00011915	AFLA_101780	1428.38	322.65	2.1463	3.1794e-07	sp|P51687|SUOX_HUMAN Sulfite oxidase, mitochondrial OS=Homo sapiens GN=SUOX PE=1 SV=2//8.44973e-50
CADAFLAG00011917	AFLA_101800	116.026	0		2.7982e-05	sp|P29026|CHI1_RHIOL Chitinase 1 OS=Rhizopus oligosporus GN=CHI1 PE=1 SV=1//4.30161e-07
CADAFLAG00011921	AFLA_101840	144.706	0		1.0385e-06	-//-
CADAFLAG00011938	AFLA_102010	148.561	694.255	-2.2244	0.0026782	-//-
CADAFLAG00011970	AFLA_102340	1729.91	716.48	1.2717	0.011174	sp|Q9P6J3|MALT_SCHPO Alpha-glucosidase OS=Schizosaccharomyces pombe (strain 972 / ATCC 24843) GN=mal1 PE=2 SV=1//0
CADAFLAG00011977	AFLA_102410	158.245	8.05562	4.296	0.00035459	-//-
CADAFLAG00012087	AFLA_103510	615.361	164.712	1.9015	0.0007622	sp|O42973|YGZ3_SCHPO Uncharacterized protein C20F10.03 OS=Schizosaccharomyces pombe (strain 972 / ATCC 24843) GN=SPBC20F10.03 PE=1 SV=1//1.64533e-08
CADAFLAG00012180	AFLA_116080	91.7811	573.907	-2.6445	0.020905	sp|A2R989|BGLI_ASPNC Probable beta-glucosidase I OS=Aspergillus niger (strain CBS 513.88 / FGSC A1513) GN=bglI PE=3 SV=1//3.6391e-42
CADAFLAG00012191	AFLA_116190	128.059	3.05722	5.3884	4.8701e-05	-//-
CADAFLAG00012274	AFLA_117020	531.208	1457.08	-1.4557	0.01129	sp|B2VC88|SSUD_ERWT9 Alkanesulfonate monooxygenase OS=Erwinia tasmaniensis (strain DSM 17950 / Et1/99) GN=ssuD PE=3 SV=1//2.14387e-48
CADAFLAG00012326	AFLA_117540	23673.6	2810	3.0746	1.1103e-19	-//-
CADAFLAG00012327	AFLA_117550	29419.7	5139.49	2.5171	8.4828e-14	sp|P32586|PYP2_SCHPO Tyrosine-protein phosphatase 2 OS=Schizosaccharomyces pombe (strain 972 / ATCC 24843) GN=pyp2 PE=1 SV=1//8.14293e-07
CADAFLAG00012334	AFLA_117620	506.632	92.0858	2.4599	6.9487e-06	-//-
CADAFLAG00012348	AFLA_117760	220.627	1062.47	-2.2677	0.00056721	sp|Q9C1T1|PHYA_ASPOR 3-phytase A OS=Aspergillus oryzae (strain ATCC 42149 / RIB 40) GN=phyA PE=2 SV=1//1.09839e-29
CADAFLAG00012367	AFLA_117950	153.721	895.237	-2.542	6.641e-05	sp|O74676|CDR4_CANAX ABC transporter CDR4 OS=Candida albicans GN=CDR4 PE=3 SV=1//0
CADAFLAG00012369	AFLA_117970	3849.76	1473.99	1.385	0.00089293	sp|Q9UW81|NOP1_NEUCR Opsin-1 OS=Neurospora crassa (strain ATCC 24698 / 74-OR23-1A / CBS 708.71 / DSM 1257 / FGSC 987) GN=nop-1 PE=1 SV=1//3.25041e-24
CADAFLAG00012422	AFLA_118500	3084.08	350.039	3.1393	1.6774e-17	-//-
CADAFLAG00012423	AFLA_118510	3075.02	1210.69	1.3448	0.017299	-//-
CADAFLAG00012537	AFLA_119650	751.097	1793.41	-1.2556	0.040561	sp|O93980|COX5_ASPNG Cytochrome c oxidase polypeptide 5, mitochondrial OS=Aspergillus niger GN=cox5 PE=3 SV=1//6.70346e-119
CADAFLAG00012577	AFLA_120050	23.2564	154.26	-2.7297	0.032208	-//-
CADAFLAG00012607	AFLA_120350	362.673	24.9529	3.8614	6.4197e-09	sp|Q5UQ60|YL662_MIMIV Uncharacterized protein L662 OS=Acanthamoeba polyphaga mimivirus GN=MIMI_L662 PE=4 SV=1//6.62414e-22
CADAFLAG00012612	AFLA_120400	167.396	36.0657	2.2146	0.045677	-//-
CADAFLAG00012635	AFLA_120630	200.729	1118.2	-2.4779	8.2639e-05	sp|Q03134|FDH_EMENI Probable formate dehydrogenase OS=Emericella nidulans (strain FGSC A4 / ATCC 38163 / CBS 112.46 / NRRL 194 / M139) GN=aciA PE=2 SV=3//1.7059e-23
CADAFLAG00012647	AFLA_120750	69.2182	0		0.0055454	-//-
CADAFLAG00012682	AFLA_121100	10.8812	212.512	-4.2876	8.8898e-05	-//-
CADAFLAG00012697	AFLA_121250	137.438	29.4562	2.2221	0.041805	sp|Q5UQ35|YR811_MIMIV Putative ariadne-like RING finger protein R811 OS=Acanthamoeba polyphaga mimivirus GN=MIMI_R811 PE=4 SV=1//6.19524e-81
CADAFLAG00012730	AFLA_121580	99.4355	788.903	-2.988	2.1291e-05	sp|Q9UUH4|MSMO_SCHPO Methylsterol monooxygenase OS=Schizosaccharomyces pombe (strain 972 / ATCC 24843) GN=erg25 PE=2 SV=1//7.47486e-100
CADAFLAG00012768	AFLA_121960	617.879	218.665	1.4986	0.027345	sp|Q9X1E3|GLPF_THEMA Probable glycerol uptake facilitator protein OS=Thermotoga maritima (strain ATCC 43589 / MSB8 / DSM 3109 / JCM 10099) GN=glpF PE=3 SV=1//1.56578e-24
CADAFLAG00012774	AFLA_122020	1472.95	382.843	1.9439	2.3147e-06	sp|Q7LL04|YQK1_SCHPO UPF0676 protein C1494.01 OS=Schizosaccharomyces pombe (strain 972 / ATCC 24843) GN=SPCC1494.01 PE=3 SV=2//4.61175e-20
CADAFLAG00012817	AFLA_122460	279.458	56.1852	2.3144	0.0015768	sp|Q93VK5|LUT5_ARATH Protein LUTEIN DEFICIENT 5, chloroplastic OS=Arabidopsis thaliana GN=CYP97A3 PE=1 SV=1//5.14764e-46
CADAFLAG00012869	AFLA_007580	484.824	37.8418	3.6794	1.4733e-09	sp|Q8GXR2|PLT6_ARATH Probable polyol transporter 6 OS=Arabidopsis thaliana GN=PLT6 PE=2 SV=2//7.62782e-51
CADAFLAG00012875	AFLA_007640	2547.84	7383.08	-1.5349	0.0033089	-//-
CADAFLAG00012881	AFLA_007700	1069.4	515.789	1.052	0.038454	-//-
CADAFLAG00012887	AFLA_007760	7340.56	1548.98	2.2446	7.1389e-12	sp|P36366|FMO2_CAVPO Dimethylaniline monooxygenase [N-oxide-forming] 2 OS=Cavia porcellus GN=FMO2 PE=2 SV=2//5.61517e-14
CADAFLAG00012908	AFLA_007970	1086.54	179.212	2.6	1.0203e-08	sp|Q9PKF7|FABG_CHLMU 3-oxoacyl-[acyl-carrier-protein] reductase FabG OS=Chlamydia muridarum (strain MoPn / Nigg) GN=fabG PE=3 SV=1//4.71871e-16
CADAFLAG00012930	AFLA_008190	817.975	308.072	1.4088	0.041035	-//-
CADAFLAG00012973	AFLA_008630	186.801	20.1195	3.2148	0.00021785	-//-
CADAFLAG00013084	AFLA_009740	112.367	6.27947	4.1614	0.0028298	-//-
CADAFLAG00013096	AFLA_009860	55.2526	0		0.026419	sp|Q9US44|YIZG_SCHPO Uncharacterized transporter C1002.16c OS=Schizosaccharomyces pombe (strain 972 / ATCC 24843) GN=SPAC1002.16c PE=2 SV=1//2.65661e-41
CADAFLAG00013178	AFLA_010680	15.6021	215.608	-3.7886	0.00014217	sp|P40896|YJV3_YEAST Uncharacterized protein YJL213W OS=Saccharomyces cerevisiae (strain ATCC 204508 / S288c) GN=YJL213W PE=2 SV=1//2.60429e-41
CADAFLAG00013181	AFLA_010710	1.20161	57.7963	-5.5879	0.011879	-//-
CADAFLAG00013182	AFLA_010720	7.78001	153.104	-4.2986	0.00091431	-//-
CADAFLAG00013197	AFLA_010870	12.4464	214.948	-4.1102	6.1467e-05	sp|Q9HFA4|XYNA_ASPOR Endo-1,4-beta-xylanase A OS=Aspergillus oryzae (strain ATCC 42149 / RIB 40) GN=xlnA PE=1 SV=1//1.51148e-29
CADAFLAG00013203	AFLA_010930	1694.13	603.411	1.4893	0.00057895	sp|Q8MU52|GST_PLAFA Glutathione S-transferase OS=Plasmodium falciparum GN=GST PE=1 SV=1//1.60741e-09
CADAFLAG00013205	AFLA_010950	725.634	270.143	1.4255	0.0080375	sp|Q12645|PID9_FUSSO Pisatin demethylase OS=Fusarium solani subsp. pisi GN=PDAT9 PE=3 SV=1//6.17258e-07
CADAFLAG00013234	AFLA_011240	75.061	417.541	-2.4758	0.0067413	-//-
CADAFLAG00013240	AFLA_011300	1103.87	166.488	2.7291	1.1186e-09	-//-
CADAFLAG00013263	AFLA_011530	174.894	4.66835	5.2274	1.9811e-06	-//-
CADAFLAG00013475	AFLA_012400	390.982	79.857	2.2916	0.00033705	sp|Q10216|YAY8_SCHPO Uncharacterized oxidoreductase C4H3.08 OS=Schizosaccharomyces pombe (strain 972 / ATCC 24843) GN=SPAC4H3.08 PE=2 SV=1//4.54279e-79
CADAFLAG00013481	AFLA_012460	1172.67	388.007	1.5956	0.00062184	-//-
Novel00098	-//-	502.15	192.062	1.3865	0.029638	-//-
Novel00150	-//-	69.8722	1.61112	5.4386	0.022448	-//-
Novel00205	-//-	371.699	43.6262	3.0909	7.019e-07	-//-
Novel00230	-//-	1088.45	161.946	2.7487	6.6022e-11	-//-
Novel00384	-//-	50.4274	0		0.044184	sp|Q12753|HAA1_YEAST Transcriptional activator HAA1 OS=Saccharomyces cerevisiae (strain ATCC 204508 / S288c) GN=HAA1 PE=1 SV=1//2.32183e-09
Novel00399	-//-	84.3162	611.215	-2.8578	3.7635e-05	-//-
Novel00437	-//-	1099.56	313.07	1.8124	2.4391e-05	-//-
Novel00447	-//-	759.304	42.3452	4.1644	1.1853e-15	-//-
Novel00545	-//-	399.622	1161.7	-1.5395	0.019477	sp|A2R5N0|EGLD_ASPNC Probable endo-beta-1,4-glucanase D OS=Aspergillus niger (strain CBS 513.88 / FGSC A1513) GN=eglD PE=3 SV=1//8.3619e-22

## Sheet: af_S_T3 vs. af_S_T2
Gene ID	Gene Name	Readcount		Log2 [(af_S_T3)/(af_S_T2)]	q value	Blast Swissprot
		af_S_T3	af_S_T2
CADAFLAG00000276	AFLA_074940	1478.47	452.501	1.7081	0.005963	sp|P54232|VEF_GVHA Viral-enhancing factor OS=Heliothis armigera granulosis virus GN=VEF PE=3 SV=1//2.2979e-34
CADAFLAG00000380	AFLA_075980	188.423	36.5093	2.3676	0.0014939	sp|P0ABR7|YEAW_ECOLI Putative dioxygenase subunit alpha YeaW OS=Escherichia coli (strain K12) GN=yeaW PE=3 SV=1//2.34151e-13
CADAFLAG00000464	AFLA_076820	684.129	190.389	1.8453	0.0078678	sp|P13006|GOX_ASPNG Glucose oxidase OS=Aspergillus niger GN=gox PE=1 SV=1//1.47834e-100
CADAFLAG00001677	AFLA_023010	168.122	31.4674	2.4176	0.00026057	-//-
CADAFLAG00002370	AFLA_029950	108.159	27.6137	1.9697	0.005963	sp|Q9USW3|YHZ7_SCHPO Probable glycosidase C21B10.07 OS=Schizosaccharomyces pombe (strain 972 / ATCC 24843) GN=SPBC21B10.07 PE=2 SV=1//8.71664e-11
CADAFLAG00002919	AFLA_035440	197.533	47.9437	2.0427	0.00802	sp|A6TFZ4|DGOD_KLEP7 D-galactonate dehydratase OS=Klebsiella pneumoniae subsp. pneumoniae (strain ATCC 700721 / MGH 78578) GN=dgoD PE=3 SV=1//9.891e-22
CADAFLAG00003015	AFLA_036400	150.193	28.1999	2.4131	6.91e-05	-//-
CADAFLAG00003098	AFLA_037250	440.413	149.048	1.5631	0.0072386	sp|P32964|CYHY_GLOSO Cyanide hydratase OS=Gloeocercospora sorghi GN=CHT PE=3 SV=1//2.08216e-09
CADAFLAG00003330	AFLA_014450	32.2582	156.632	-2.2796	0.00078771	sp|Q9UTN0|YII3_SCHPO Uncharacterized transcriptional regulatory protein C139.03 OS=Schizosaccharomyces pombe (strain 972 / ATCC 24843) GN=SPAC139.03 PE=2 SV=1//4.97705e-14
CADAFLAG00003497	AFLA_016120	7.77974	63.3863	-3.0264	0.0011142	sp|Q12120|OMTA_ASPPA Sterigmatocystin 8-O-methyltransferase OS=Aspergillus parasiticus GN=omtA PE=1 SV=1//4.30982e-15
CADAFLAG00003927	AFLA_020420	1052.54	423.383	1.3138	0.031656	-//-
CADAFLAG00003928	AFLA_020430	129.687	19.9894	2.6977	9.31e-05	-//-
CADAFLAG00004313	AFLA_105760	464.382	82.1123	2.4996	0.00012999	sp|Q9UI17|M2GD_HUMAN Dimethylglycine dehydrogenase, mitochondrial OS=Homo sapiens GN=DMGDH PE=1 SV=2//6.58626e-104
CADAFLAG00004347	AFLA_106110	9.29748	60.6772	-2.7062	0.003125	sp|Q9USN4|YJA1_SCHPO Uncharacterized transporter C1529.01 OS=Schizosaccharomyces pombe (strain 972 / ATCC 24843) GN=SPCC1529.01 PE=2 SV=2//9.17318e-08
CADAFLAG00004947	AFLA_112130	3397.59	1147.34	1.5662	0.022042	sp|Q10161|CLH_SCHPO Probable clathrin heavy chain OS=Schizosaccharomyces pombe (strain 972 / ATCC 24843) GN=chc1 PE=1 SV=1//6.94525e-19
CADAFLAG00005602	AFLA_042750	14.7033	70.5314	-2.2621	0.016165	-//-
CADAFLAG00006324	AFLA_057150	109.585	16.8051	2.7051	0.00037948	sp|Q5MK11|CVNH_TUBBO Cyanovirin-N homolog OS=Tuber borchii PE=1 SV=1//5.00624e-10
CADAFLAG00006358	AFLA_057490	104.551	715.362	-2.7745	3.42e-07	-//-
CADAFLAG00006376	AFLA_057670	7.58867	57.1483	-2.9128	0.0027187	sp|Q2UP30|NPIIA_ASPOR Neutral protease 2 homolog AO090001000135 OS=Aspergillus oryzae (strain ATCC 42149 / RIB 40) GN=AO090001000135 PE=3 SV=1//8.02913e-41
CADAFLAG00006559	AFLA_059500	175.623	35.5152	2.306	0.0011309	sp|Q2U8C6|ABNA_ASPOR Probable arabinan endo-1,5-alpha-L-arabinosidase A OS=Aspergillus oryzae (strain ATCC 42149 / RIB 40) GN=abnA PE=3 SV=1//6.05096e-09
CADAFLAG00006864	AFLA_062550	51.6138	9.24814	2.4805	0.0063513	sp|O14111|PSD3_SCHPO Phosphatidylserine decarboxylase proenzyme 3 OS=Schizosaccharomyces pombe (strain 972 / ATCC 24843) GN=psd3 PE=2 SV=2//1.07708e-20
CADAFLAG00006902	AFLA_062930	337.837	109.663	1.6233	0.043779	sp|P82594|ABF2_STRCX Alpha-N-arabinofuranosidase 2 OS=Streptomyces chartreusis PE=1 SV=1//3.29268e-11
CADAFLAG00007669	AFLA_137920	1.51773	33.8676	-4.4799	0.022901	sp|Q870L2|MIRB_EMENI Siderophore iron transporter mirB OS=Emericella nidulans (strain FGSC A4 / ATCC 38163 / CBS 112.46 / NRRL 194 / M139) GN=mirB PE=3 SV=1//1.33479e-12
CADAFLAG00007952	AFLA_065280	783.292	249.331	1.6515	0.0072386	sp|Q8J130|TYRO_ASPFU Tyrosinase OS=Neosartorya fumigata (strain ATCC MYA-4609 / Af293 / CBS 101355 / FGSC A1100) GN=tyr1 PE=3 SV=2//1.49875e-130
CADAFLAG00007980	AFLA_065560	90.417	286.146	-1.6621	0.039574	-//-
CADAFLAG00008682	AFLA_089960	577.682	141.676	2.0277	0.0078678	-//-
CADAFLAG00008709	AFLA_090240	65.0859	15.9179	2.0317	0.037432	sp|Q9HFA4|XYNA_ASPOR Endo-1,4-beta-xylanase A OS=Aspergillus oryzae (strain ATCC 42149 / RIB 40) GN=xlnA PE=1 SV=1//2.96984e-55
CADAFLAG00009364	AFLA_122950	25.9962	3.09724	3.0692	0.028269	-//-
CADAFLAG00009408	AFLA_123500	285.851	73.3672	1.9621	0.0068186	-//-
CADAFLAG00009409	AFLA_123510	129.606	24.4253	2.4077	0.005963	sp|P0ABR7|YEAW_ECOLI Putative dioxygenase subunit alpha YeaW OS=Escherichia coli (strain K12) GN=yeaW PE=3 SV=1//6.7146e-25
CADAFLAG00009542	AFLA_124840	58.4382	15.3119	1.9323	0.048846	-//-
CADAFLAG00009556	AFLA_124980	931.114	261.887	1.83	0.0027187	sp|P20370|DC4C_ACIAD 4-carboxymuconolactone decarboxylase OS=Acinetobacter sp. (strain ADP1) GN=pcaC PE=4 SV=2//9.83574e-28
CADAFLAG00009557	AFLA_124990	1987.54	701.199	1.5031	0.014449	-//-
CADAFLAG00009558	AFLA_125000	639.722	184.654	1.7926	0.00802	sp|O59700|YN43_SCHPO Uncharacterized transporter C36.03c OS=Schizosaccharomyces pombe (strain 972 / ATCC 24843) GN=SPBC36.03c PE=2 SV=1//6.96137e-135
CADAFLAG00009697	AFLA_126390	2493.15	779.584	1.6772	0.027106	sp|Q01284|2NPD_NEUCR Nitronate monooxygenase OS=Neurospora crassa (strain ATCC 24698 / 74-OR23-1A / CBS 708.71 / DSM 1257 / FGSC 987) GN=ncd-2 PE=1 SV=1//1.52879e-11
CADAFLAG00009820	AFLA_127620	146.962	49.2706	1.5766	0.036712	-//-
CADAFLAG00011503	AFLA_097650	12.1419	59.6633	-2.2969	0.049901	sp|P16273|PRPX_HORVU Pathogen-related protein OS=Hordeum vulgare PE=2 SV=2//2.44207e-17
CADAFLAG00011552	AFLA_098140	158.821	28.4335	2.4817	0.00054739	sp|Q08777|MCH5_YEAST Riboflavin transporter MCH5 OS=Saccharomyces cerevisiae (strain ATCC 204508 / S288c) GN=MCH5 PE=1 SV=2//2.1301e-19
CADAFLAG00011874	AFLA_101370	234.528	77.2487	1.6022	0.031656	sp|O64518|MCA5_ARATH Metacaspase-5 OS=Arabidopsis thaliana GN=AMC5 PE=1 SV=1//3.31041e-10
CADAFLAG00012607	AFLA_120350	171.14	39.9789	2.0979	0.0011309	sp|Q5UQ60|YL662_MIMIV Uncharacterized protein L662 OS=Acanthamoeba polyphaga mimivirus GN=MIMI_L662 PE=4 SV=1//6.62414e-22
CADAFLAG00012698	AFLA_121260	13.8543	69.4937	-2.3265	0.012157	sp|Q4WFS2|Y1220_ASPFU Probable aspartic-type endopeptidase AFUA_3G01220 OS=Neosartorya fumigata (strain ATCC MYA-4609 / Af293 / CBS 101355 / FGSC A1100) GN=AFUA_3G01220 PE=3 SV=2//2.27306e-66
CADAFLAG00012922	AFLA_008110	253.773	63.7071	1.994	0.0086095	sp|B8NXJ2|XYNF3_ASPFN Probable endo-1,4-beta-xylanase F3 OS=Aspergillus flavus (strain ATCC 200026 / FGSC A1120 / NRRL 3357 / JCM 12722 / SRRC 167) GN=xynF3 PE=2 SV=1//3.91085e-10
CADAFLAG00013230	AFLA_011200	5.21834	47.6427	-3.1906	0.0027465	sp|P37610|TAUD_ECOLI Alpha-ketoglutarate-dependent taurine dioxygenase OS=Escherichia coli (strain K12) GN=tauD PE=1 SV=3//3.68174e-37
Novel00150	-//-	76.4671	13.4504	2.5072	0.00037948	-//-
Novel00399	-//-	255.681	50.2409	2.3474	0.00037948	-//-
