# Supplementary material for: Functional Genomic Analysis of Aspergillus flavus Interacting with Resistant and Susceptible Peanut
Source: MDPI journal article supplement (doi:10.3390/toxins8020046), 2016-02-15
Supplement: s1 [file toxins-114703-Table S6.xlsx]

## Sheet: af_R_T3 vs af_S_T3
GO ID	Term	Categories	q value	DEGs amount	Up-regulated DEGs	Down-regulated DEGs	Up-regulated DEGs list	Down-regulated DEGs list
GO:0005975	carbohydrate metabolic process	biological process	3.7679e-20	137	23(16.79%)	114(83.21%)	CADAFLAG00004149,CADAFLAG00004302,CADAFLAG00006457,CADAFLAG00005856,CADAFLAG00007166,CADAFLAG00009748,CADAFLAG00009868,CADAFLAG00007273,CADAFLAG00003304,CADAFLAG00009064,CADAFLAG00002955,CADAFLAG00003740,CADAFLAG00001565,CADAFLAG00001568,CADAFLAG00001714,CADAFLAG00007705,CADAFLAG00010208,CADAFLAG00009532,CADAFLAG00011970,CADAFLAG00003944,CADAFLAG00009736,CADAFLAG00011715,CADAFLAG00012811	CADAFLAG00009264,CADAFLAG00006902,CADAFLAG00005566,CADAFLAG00013197,CADAFLAG00006003,CADAFLAG00005208,CADAFLAG00006958,CADAFLAG00006084,CADAFLAG00011562,CADAFLAG00002565,CADAFLAG00010147,CADAFLAG00003595,CADAFLAG00010065,CADAFLAG00001722,CADAFLAG00008254,CADAFLAG00004326,CADAFLAG00011105,CADAFLAG00009906,CADAFLAG00003850,CADAFLAG00006913,CADAFLAG00003455,CADAFLAG00009427,CADAFLAG00002468,CADAFLAG…
GO:0003824	catalytic activity	molecular function	5.0409e-13	835	251(30.06%)	584(69.94%)	CADAFLAG00011388,CADAFLAG00001207,CADAFLAG00001873,CADAFLAG00007166,CADAFLAG00006495,CADAFLAG00007900,CADAFLAG00005533,CADAFLAG00011679,CADAFLAG00007273,CADAFLAG00011395,CADAFLAG00007653,CADAFLAG00002235,CADAFLAG00008587,CADAFLAG00001783,CADAFLAG00011507,CADAFLAG00005263,CADAFLAG00004977,CADAFLAG00012612,CADAFLAG00006651,CADAFLAG00004302,CADAFLAG00001030,CADAFLAG00006457,CADAFLAG00002156,CADAFLAG…	CADAFLAG00003850,CADAFLAG00009081,CADAFLAG00003151,CADAFLAG00009427,CADAFLAG00010826,CADAFLAG00002481,CADAFLAG00010765,Novel00226,CADAFLAG00003846,CADAFLAG00001639,CADAFLAG00002070,CADAFLAG00010700,CADAFLAG00008943,CADAFLAG00006724,CADAFLAG00002403,CADAFLAG00006720,CADAFLAG00006902,CADAFLAG00003074,CADAFLAG00002883,CADAFLAG00002239,CADAFLAG00012577,CADAFLAG00010720,CADAFLAG00006374,CADAFLAG000025…
GO:0055114	oxidation-reduction process	biological process	7.3988e-13	175	34(19.43%)	141(80.57%)	CADAFLAG00007400,CADAFLAG00012857,CADAFLAG00010237,CADAFLAG00007886,CADAFLAG00012730,CADAFLAG00013205,CADAFLAG00001139,CADAFLAG00011485,CADAFLAG00010073,CADAFLAG00003740,CADAFLAG00009867,CADAFLAG00002082,CADAFLAG00007600,CADAFLAG00006495,CADAFLAG00011104,CADAFLAG00004300,CADAFLAG00008785,CADAFLAG00006736,CADAFLAG00003215,CADAFLAG00001783,CADAFLAG00011507,CADAFLAG00001030,CADAFLAG00010613,CADAFLAG…	CADAFLAG00002882,CADAFLAG00001117,CADAFLAG00012816,CADAFLAG00002780,CADAFLAG00007535,CADAFLAG00006588,CADAFLAG00009697,CADAFLAG00010929,CADAFLAG00006370,CADAFLAG00001168,CADAFLAG00005531,CADAFLAG00001144,CADAFLAG00005365,CADAFLAG00009567,CADAFLAG00011574,CADAFLAG00000380,CADAFLAG00006226,CADAFLAG00001837,CADAFLAG00006925,CADAFLAG00008812,CADAFLAG00011353,CADAFLAG00004424,CADAFLAG00011567,CADAFLAG…
GO:0044710	single-organism metabolic process	biological process	8.9781e-13	305	74(24.26%)	231(75.74%)	CADAFLAG00007886,CADAFLAG00012730,CADAFLAG00010237,CADAFLAG00012857,CADAFLAG00003740,CADAFLAG00010073,CADAFLAG00005185,CADAFLAG00009064,CADAFLAG00006137,CADAFLAG00010899,CADAFLAG00001139,CADAFLAG00004300,CADAFLAG00008571,CADAFLAG00011104,CADAFLAG00007600,CADAFLAG00009867,CADAFLAG00011184,CADAFLAG00002082,CADAFLAG00009983,CADAFLAG00002422,CADAFLAG00008325,CADAFLAG00003215,CADAFLAG00004981,CADAFLAG…	CADAFLAG00000162,CADAFLAG00001573,CADAFLAG00012559,CADAFLAG00004164,CADAFLAG00006291,CADAFLAG00004424,CADAFLAG00011567,CADAFLAG00001837,CADAFLAG00011353,CADAFLAG00008812,CADAFLAG00000057,CADAFLAG00009567,CADAFLAG00000871,CADAFLAG00005365,CADAFLAG00000701,CADAFLAG00001168,CADAFLAG00005531,CADAFLAG00001117,CADAFLAG00012816,CADAFLAG00003397,CADAFLAG00005529,CADAFLAG00007118,CADAFLAG00008944,CADAFLAG…
GO:0016052	carbohydrate catabolic process	biological process	8.9781e-13	44	4(9.09%)	40(90.91%)	CADAFLAG00003740,CADAFLAG00002955,CADAFLAG00001568,CADAFLAG00012811	CADAFLAG00012568,CADAFLAG00010065,CADAFLAG00005767,CADAFLAG00002904,CADAFLAG00011568,CADAFLAG00010255,CADAFLAG00008361,CADAFLAG00007326,CADAFLAG00000821,CADAFLAG00000915,CADAFLAG00002335,CADAFLAG00012501,CADAFLAG00012175,CADAFLAG00007943,CADAFLAG00008188,CADAFLAG00006084,CADAFLAG00003695,CADAFLAG00001824,CADAFLAG00003121,CADAFLAG00013197,CADAFLAG00005566,CADAFLAG00008039,CADAFLAG00011234,CADAFLAG…
GO:0005996	monosaccharide metabolic process	biological process	3.2785e-12	39	2(5.13%)	37(94.87%)	CADAFLAG00001568,CADAFLAG00003944	CADAFLAG00001886,CADAFLAG00005768,CADAFLAG00004107,CADAFLAG00004326,CADAFLAG00009909,CADAFLAG00001319,CADAFLAG00006925,CADAFLAG00002468,CADAFLAG00012567,CADAFLAG00004946,CADAFLAG00010861,CADAFLAG00004666,CADAFLAG00004167,CADAFLAG00004375,CADAFLAG00002106,CADAFLAG00000459,CADAFLAG00005566,CADAFLAG00003452,CADAFLAG00003121,CADAFLAG00003695,CADAFLAG00003763,CADAFLAG00003012,CADAFLAG00001824,CADAFLAG…
GO:0044723	single-organism carbohydrate metabolic process	biological process	9.5707e-11	52	4(7.69%)	48(92.31%)	CADAFLAG00003944,CADAFLAG00001568,CADAFLAG00004149,CADAFLAG00003740	CADAFLAG00001319,CADAFLAG00005768,CADAFLAG00001886,CADAFLAG00009909,CADAFLAG00004107,CADAFLAG00004326,CADAFLAG00004666,CADAFLAG00004946,CADAFLAG00010861,CADAFLAG00004375,CADAFLAG00004167,CADAFLAG00011234,CADAFLAG00006925,CADAFLAG00012108,CADAFLAG00012567,CADAFLAG00002468,CADAFLAG00008663,CADAFLAG00006084,CADAFLAG00008188,CADAFLAG00006958,CADAFLAG00000915,CADAFLAG00008426,CADAFLAG00010349,CADAFLAG…
GO:0044724	single-organism carbohydrate catabolic process	biological process	1.7417e-10	30	2(6.67%)	28(93.33%)	CADAFLAG00003740,CADAFLAG00001568	CADAFLAG00010065,CADAFLAG00011234,CADAFLAG00012568,CADAFLAG00004375,CADAFLAG00010861,CADAFLAG00004666,CADAFLAG00005767,CADAFLAG00011568,CADAFLAG00002468,CADAFLAG00002904,CADAFLAG00012567,CADAFLAG00000821,CADAFLAG00007326,CADAFLAG00008361,CADAFLAG00006925,CADAFLAG00002335,CADAFLAG00012501,CADAFLAG00000915,CADAFLAG00001319,CADAFLAG00006084,CADAFLAG00008188,CADAFLAG00001824,CADAFLAG00009909,CADAFLAG…
GO:0006006	glucose metabolic process	biological process	2.2176e-10	28	1(3.57%)	27(96.43%)	CADAFLAG00001568	CADAFLAG00000821,CADAFLAG00007326,CADAFLAG00008361,CADAFLAG00006925,CADAFLAG00011568,CADAFLAG00002468,CADAFLAG00002904,CADAFLAG00012567,CADAFLAG00004375,CADAFLAG00010861,CADAFLAG00004946,CADAFLAG00004666,CADAFLAG00010065,CADAFLAG00012568,CADAFLAG00005566,CADAFLAG00003121,CADAFLAG00002106,CADAFLAG00000459,CADAFLAG00001824,CADAFLAG00009909,CADAFLAG00001886,CADAFLAG00003695,CADAFLAG00003012,CADAFLAG…
GO:0019318	hexose metabolic process	biological process	2.6979e-10	32	2(6.25%)	30(93.75%)	CADAFLAG00001568,CADAFLAG00003944	CADAFLAG00003695,CADAFLAG00003763,CADAFLAG00003012,CADAFLAG00001824,CADAFLAG00002106,CADAFLAG00000459,CADAFLAG00005566,CADAFLAG00003121,CADAFLAG00002335,CADAFLAG00012501,CADAFLAG00008188,CADAFLAG00006084,CADAFLAG00011568,CADAFLAG00002904,CADAFLAG00008361,CADAFLAG00000821,CADAFLAG00007326,CADAFLAG00012568,CADAFLAG00010065,CADAFLAG00001886,CADAFLAG00004107,CADAFLAG00009909,CADAFLAG00001319,CADAFLAG…
GO:0046365	monosaccharide catabolic process	biological process	1.0644e-09	26	1(3.85%)	25(96.15%)	CADAFLAG00001568	CADAFLAG00012568,CADAFLAG00010065,CADAFLAG00004666,CADAFLAG00010861,CADAFLAG00004375,CADAFLAG00002904,CADAFLAG00012567,CADAFLAG00011568,CADAFLAG00002468,CADAFLAG00006925,CADAFLAG00008361,CADAFLAG00007326,CADAFLAG00000821,CADAFLAG00012501,CADAFLAG00002335,CADAFLAG00008188,CADAFLAG00006084,CADAFLAG00001319,CADAFLAG00005768,CADAFLAG00003695,CADAFLAG00001886,CADAFLAG00009909,CADAFLAG00001824,CADAFLAG…
GO:0019320	hexose catabolic process	biological process	1.8207e-09	25	1(4.00%)	24(96.00%)	CADAFLAG00001568	CADAFLAG00005566,CADAFLAG00003121,CADAFLAG00001886,CADAFLAG00003695,CADAFLAG00001824,CADAFLAG00009909,CADAFLAG00001319,CADAFLAG00008188,CADAFLAG00006084,CADAFLAG00012501,CADAFLAG00002335,CADAFLAG00008361,CADAFLAG00006925,CADAFLAG00000821,CADAFLAG00007326,CADAFLAG00002468,CADAFLAG00011568,CADAFLAG00012567,CADAFLAG00002904,CADAFLAG00010861,CADAFLAG00004666,CADAFLAG00004375,CADAFLAG00012568,CADAFLAG…
GO:0006007	glucose catabolic process	biological process	2.7084e-09	24	1(4.17%)	23(95.83%)	CADAFLAG00001568	CADAFLAG00002468,CADAFLAG00011568,CADAFLAG00002904,CADAFLAG00012567,CADAFLAG00008361,CADAFLAG00006925,CADAFLAG00000821,CADAFLAG00007326,CADAFLAG00012568,CADAFLAG00010065,CADAFLAG00010861,CADAFLAG00004666,CADAFLAG00004375,CADAFLAG00001886,CADAFLAG00003695,CADAFLAG00001824,CADAFLAG00009909,CADAFLAG00005566,CADAFLAG00003121,CADAFLAG00012501,CADAFLAG00001319,CADAFLAG00006084,CADAFLAG00008188
GO:0006091	generation of precursor metabolites and energy	biological process	2.7084e-09	34	3(8.82%)	31(91.18%)	CADAFLAG00003740,CADAFLAG00001568,CADAFLAG00002082	CADAFLAG00008361,CADAFLAG00002904,CADAFLAG00002114,CADAFLAG00010931,CADAFLAG00010853,CADAFLAG00010065,CADAFLAG00010532,CADAFLAG00005048,CADAFLAG00005566,CADAFLAG00003121,CADAFLAG00001824,CADAFLAG00010561,CADAFLAG00006084,CADAFLAG00008188,CADAFLAG00000915,CADAFLAG00012501,CADAFLAG00009842,CADAFLAG00008812,CADAFLAG00012136,CADAFLAG00010765,CADAFLAG00002468,CADAFLAG00012567,CADAFLAG00012559,CADAFLAG…
GO:0016491	oxidoreductase activity	molecular function	2.7084e-09	306	82(26.80%)	224(73.20%)	CADAFLAG00009720,CADAFLAG00008895,CADAFLAG00006497,CADAFLAG00006608,CADAFLAG00011796,CADAFLAG00007292,CADAFLAG00011354,CADAFLAG00010970,CADAFLAG00006427,CADAFLAG00009716,CADAFLAG00006498,CADAFLAG00007049,CADAFLAG00010915,CADAFLAG00004491,CADAFLAG00005854,CADAFLAG00006496,CADAFLAG00006606,CADAFLAG00009190,CADAFLAG00008852,CADAFLAG00011485,CADAFLAG00001506,CADAFLAG00006169,CADAFLAG00001092,CADAFLAG…	CADAFLAG00007326,CADAFLAG00007768,CADAFLAG00002114,CADAFLAG00005221,CADAFLAG00000264,CADAFLAG00000354,CADAFLAG00012887,CADAFLAG00002319,CADAFLAG00006472,CADAFLAG00008547,CADAFLAG00000507,CADAFLAG00008542,CADAFLAG00002186,CADAFLAG00005249,CADAFLAG00011628,CADAFLAG00002100,CADAFLAG00004311,CADAFLAG00005887,CADAFLAG00013475,CADAFLAG00003454,CADAFLAG00001886,CADAFLAG00005768,CADAFLAG00009912,CADAFLAG…
GO:0004553	hydrolase activity, hydrolyzing O-glycosyl compounds	molecular function	5.827e-09	70	12(17.14%)	58(82.86%)	CADAFLAG00012811,CADAFLAG00001565,CADAFLAG00011715,CADAFLAG00007705,CADAFLAG00011267,CADAFLAG00003304,CADAFLAG00009736,CADAFLAG00002955,CADAFLAG00009532,CADAFLAG00005856,CADAFLAG00010208,CADAFLAG00004302	CADAFLAG00007056,CADAFLAG00011938,CADAFLAG00009870,CADAFLAG00005201,CADAFLAG00001853,CADAFLAG00011234,CADAFLAG00001415,CADAFLAG00008039,CADAFLAG00004167,CADAFLAG00012922,CADAFLAG00005243,CADAFLAG00001327,CADAFLAG00013016,CADAFLAG00006960,CADAFLAG00009353,CADAFLAG00009851,CADAFLAG00006713,CADAFLAG00004328,CADAFLAG00007943,CADAFLAG00008663,CADAFLAG00012745,CADAFLAG00001725,CADAFLAG00004552,Novel003…
GO:0016798	hydrolase activity, acting on glycosyl bonds	molecular function	1.195e-08	70	12(17.14%)	58(82.86%)	CADAFLAG00011715,CADAFLAG00001565,CADAFLAG00012811,CADAFLAG00011267,CADAFLAG00007705,CADAFLAG00003304,CADAFLAG00009736,CADAFLAG00002955,CADAFLAG00005856,CADAFLAG00010208,CADAFLAG00009532,CADAFLAG00004302	CADAFLAG00001853,CADAFLAG00005201,CADAFLAG00009870,CADAFLAG00011938,CADAFLAG00007056,CADAFLAG00013016,CADAFLAG00001327,CADAFLAG00009851,CADAFLAG00009353,CADAFLAG00006960,CADAFLAG00008039,CADAFLAG00001415,CADAFLAG00011234,CADAFLAG00012922,CADAFLAG00005243,CADAFLAG00004167,CADAFLAG00001725,CADAFLAG00012745,Novel00395,CADAFLAG00003452,CADAFLAG00004552,CADAFLAG00006713,CADAFLAG00008663,CADAFLAG000079…
GO:0008150	biological process	biological process	1.0889e-07	857	284(33.14%)	573(66.86%)	CADAFLAG00001827,CADAFLAG00006427,CADAFLAG00006498,CADAFLAG00008908,CADAFLAG00000767,CADAFLAG00004562,CADAFLAG00003555,CADAFLAG00007292,CADAFLAG00008381,CADAFLAG00010208,CADAFLAG00008144,Novel00407,CADAFLAG00002592,CADAFLAG00000435,CADAFLAG00010915,CADAFLAG00010039,CADAFLAG00000167,CADAFLAG00009736,Novel00276,CADAFLAG00001107,CADAFLAG00007156,CADAFLAG00001549,CADAFLAG00009455,CADAFLAG00009131,CAD…	CADAFLAG00000791,CADAFLAG00001225,CADAFLAG00005461,CADAFLAG00012175,CADAFLAG00001560,CADAFLAG00007905,CADAFLAG00010900,CADAFLAG00012212,CADAFLAG00009662,CADAFLAG00002919,CADAFLAG00004943,CADAFLAG00002899,CADAFLAG00007226,CADAFLAG00010255,CADAFLAG00001250,CADAFLAG00011601,CADAFLAG00001659,CADAFLAG00008409,CADAFLAG00010622,CADAFLAG00002718,CADAFLAG00012165,CADAFLAG00006110,Novel00409,CADAFLAG000034…
GO:0044281	small molecule metabolic process	biological process	4.8682e-07	151	45(29.80%)	106(70.20%)	CADAFLAG00008383,CADAFLAG00003002,CADAFLAG00002057,CADAFLAG00011796,CADAFLAG00009624,CADAFLAG00007672,CADAFLAG00005035,CADAFLAG00004546,CADAFLAG00013256,CADAFLAG00002940,CADAFLAG00011128,CADAFLAG00000167,CADAFLAG00010039,CADAFLAG00001172,CADAFLAG00006475,CADAFLAG00012379,CADAFLAG00006133,CADAFLAG00007292,CADAFLAG00013027,CADAFLAG00010652,CADAFLAG00006242,CADAFLAG00012730,CADAFLAG00001568,CADAFLAG…	CADAFLAG00005207,CADAFLAG00006001,CADAFLAG00001960,CADAFLAG00004666,CADAFLAG00004055,CADAFLAG00009909,CADAFLAG00011144,CADAFLAG00005114,CADAFLAG00004747,CADAFLAG00005092,CADAFLAG00011307,CADAFLAG00008265,CADAFLAG00009911,CADAFLAG00009912,CADAFLAG00006826,CADAFLAG00007326,CADAFLAG00000821,CADAFLAG00008169,CADAFLAG00002249,CADAFLAG00011231,CADAFLAG00006116,CADAFLAG00010436,CADAFLAG00000507,CADAFLAG…
GO:0009056	catabolic process	biological process	1.1223e-06	86	5(5.81%)	81(94.19%)	CADAFLAG00002341,CADAFLAG00001568,CADAFLAG00012811,CADAFLAG00003740,CADAFLAG00002955	CADAFLAG00010861,CADAFLAG00004375,CADAFLAG00008709,CADAFLAG00008730,CADAFLAG00008672,CADAFLAG00009699,CADAFLAG00001852,CADAFLAG00010765,CADAFLAG00003273,CADAFLAG00002468,CADAFLAG00012476,CADAFLAG00001724,CADAFLAG00001895,CADAFLAG00005511,CADAFLAG00001124,CADAFLAG00010065,CADAFLAG00003041,CADAFLAG00006589,CADAFLAG00008361,CADAFLAG00002919,CADAFLAG00010255,CADAFLAG00002899,CADAFLAG00011568,CADAFLAG…
GO:0006082	organic acid metabolic process	biological process	2.7429e-06	95	24(25.26%)	71(74.74%)	CADAFLAG00003002,CADAFLAG00004630,CADAFLAG00012730,CADAFLAG00001568,CADAFLAG00007396,CADAFLAG00010073,CADAFLAG00005185,CADAFLAG00011573,CADAFLAG00007672,CADAFLAG00006169,CADAFLAG00006137,CADAFLAG00001139,CADAFLAG00010039,CADAFLAG00004546,CADAFLAG00005035,CADAFLAG00012379,CADAFLAG00002082,CADAFLAG00011184,CADAFLAG00007292,CADAFLAG00001030,CADAFLAG00002422,CADAFLAG00011507,CADAFLAG00004981,CADAFLAG…	CADAFLAG00004666,CADAFLAG00004055,CADAFLAG00001960,CADAFLAG00006276,CADAFLAG00006001,CADAFLAG00008812,CADAFLAG00004298,CADAFLAG00000871,CADAFLAG00000057,CADAFLAG00005804,CADAFLAG00011307,CADAFLAG00008265,CADAFLAG00009911,CADAFLAG00009912,CADAFLAG00005092,CADAFLAG00001144,CADAFLAG00002780,CADAFLAG00011144,CADAFLAG00001117,CADAFLAG00005114,CADAFLAG00011231,CADAFLAG00010436,CADAFLAG00006116,CADAFLAG…
GO:0019752	carboxylic acid metabolic process	biological process	3.8826e-06	93	24(25.81%)	69(74.19%)	CADAFLAG00002422,CADAFLAG00007292,CADAFLAG00001030,CADAFLAG00004981,CADAFLAG00010652,CADAFLAG00011507,CADAFLAG00005035,CADAFLAG00004546,CADAFLAG00010039,CADAFLAG00002082,CADAFLAG00011184,CADAFLAG00012379,CADAFLAG00005185,CADAFLAG00011573,CADAFLAG00010073,CADAFLAG00001139,CADAFLAG00006137,CADAFLAG00006169,CADAFLAG00007672,CADAFLAG00001568,CADAFLAG00012730,CADAFLAG00003002,CADAFLAG00004630,CADAFLAG…	CADAFLAG00000058,CADAFLAG00002652,CADAFLAG00007792,CADAFLAG00010458,CADAFLAG00005829,CADAFLAG00002919,CADAFLAG00005511,CADAFLAG00008854,CADAFLAG00003041,CADAFLAG00006110,CADAFLAG00010931,CADAFLAG00009959,CADAFLAG00007367,CADAFLAG00000060,CADAFLAG00012577,CADAFLAG00002495,CADAFLAG00010900,CADAFLAG00011055,CADAFLAG00006084,CADAFLAG00008308,CADAFLAG00001419,CADAFLAG00008581,CADAFLAG00001245,CADAFLAG…
GO:1901575	organic substance catabolic process	biological process	3.8826e-06	80	5(6.25%)	75(93.75%)	CADAFLAG00002341,CADAFLAG00003740,CADAFLAG00002955,CADAFLAG00012811,CADAFLAG00001568	CADAFLAG00006084,CADAFLAG00008308,CADAFLAG00012175,CADAFLAG00000915,CADAFLAG00002495,CADAFLAG00013197,CADAFLAG00003121,CADAFLAG00005566,Novel00171,CADAFLAG00006003,CADAFLAG00006720,CADAFLAG00003041,CADAFLAG00006589,CADAFLAG00001124,CADAFLAG00010065,CADAFLAG00005511,CADAFLAG00002919,CADAFLAG00008361,CADAFLAG00002899,CADAFLAG00011568,CADAFLAG00010255,CADAFLAG00001724,CADAFLAG00001895,CADAFLAG000043…
GO:0043436	oxoacid metabolic process	biological process	7.6663e-06	93	24(25.81%)	69(74.19%)	CADAFLAG00007396,CADAFLAG00003002,CADAFLAG00004630,CADAFLAG00001568,CADAFLAG00012730,CADAFLAG00006169,CADAFLAG00007672,CADAFLAG00001139,CADAFLAG00006137,CADAFLAG00010073,CADAFLAG00011573,CADAFLAG00005185,CADAFLAG00012379,CADAFLAG00002082,CADAFLAG00011184,CADAFLAG00010039,CADAFLAG00005035,CADAFLAG00004546,CADAFLAG00004981,CADAFLAG00010652,CADAFLAG00011507,CADAFLAG00001030,CADAFLAG00007292,CADAFLAG…	CADAFLAG00001144,CADAFLAG00005092,CADAFLAG00008265,CADAFLAG00011307,CADAFLAG00009912,CADAFLAG00009911,CADAFLAG00002780,CADAFLAG00001117,CADAFLAG00011144,CADAFLAG00005114,CADAFLAG00006001,CADAFLAG00001960,CADAFLAG00006276,CADAFLAG00004666,CADAFLAG00004055,CADAFLAG00000871,CADAFLAG00005804,CADAFLAG00000057,CADAFLAG00008812,CADAFLAG00004298,CADAFLAG00004024,CADAFLAG00004998,CADAFLAG00000507,CADAFLAG…
GO:0000272	polysaccharide catabolic process	biological process	8.5698e-06	14	3(21.43%)	11(78.57%)	CADAFLAG00003740,CADAFLAG00012811,CADAFLAG00002955	CADAFLAG00012175,CADAFLAG00012922,CADAFLAG00005243,CADAFLAG00007943,CADAFLAG00008039,CADAFLAG00000915,CADAFLAG00008709,CADAFLAG00013197,CADAFLAG00009699,CADAFLAG00006960,CADAFLAG00013016
GO:0046496	nicotinamide nucleotide metabolic process	biological process	2.6014e-05	16	0	16(100.00%)		CADAFLAG00007326,CADAFLAG00000821,CADAFLAG00006925,CADAFLAG00011568,CADAFLAG00006826,CADAFLAG00004375,CADAFLAG00004666,CADAFLAG00010861,CADAFLAG00001960,CADAFLAG00012568,CADAFLAG00006003,CADAFLAG00009909,CADAFLAG00000914,CADAFLAG00003695,CADAFLAG00012101,CADAFLAG00008188
GO:0044282	small molecule catabolic process	biological process	2.6833e-05	23	1(4.35%)	22(95.65%)	CADAFLAG00002341	CADAFLAG00000057,CADAFLAG00005804,CADAFLAG00002919,CADAFLAG00008169,CADAFLAG00005511,CADAFLAG00006589,CADAFLAG00008730,CADAFLAG00006276,CADAFLAG00001960,CADAFLAG00002249,CADAFLAG00005767,CADAFLAG00010861,CADAFLAG00000507,CADAFLAG00000297,CADAFLAG00005114,CADAFLAG00004313,CADAFLAG00003019,CADAFLAG00011074,CADAFLAG00002495,CADAFLAG00008617,CADAFLAG00008308,CADAFLAG00009912
GO:0044712	single-organism catabolic process	biological process	2.6833e-05	23	1(4.35%)	22(95.65%)	CADAFLAG00002341	CADAFLAG00002919,CADAFLAG00005804,CADAFLAG00000057,CADAFLAG00010861,CADAFLAG00005767,CADAFLAG00002249,CADAFLAG00001960,CADAFLAG00006276,CADAFLAG00008730,CADAFLAG00006589,CADAFLAG00005511,CADAFLAG00008169,CADAFLAG00011074,CADAFLAG00003019,CADAFLAG00004313,CADAFLAG00005114,CADAFLAG00000297,CADAFLAG00000507,CADAFLAG00009912,CADAFLAG00008308,CADAFLAG00008617,CADAFLAG00002495
GO:0015980	energy derivation by oxidation of organic compounds	biological process	2.9102e-05	21	2(9.52%)	19(90.48%)	CADAFLAG00003740,CADAFLAG00002082	CADAFLAG00010931,CADAFLAG00012559,CADAFLAG00010861,CADAFLAG00010532,CADAFLAG00010853,CADAFLAG00011567,CADAFLAG00012136,CADAFLAG00008812,CADAFLAG00002114,CADAFLAG00010765,CADAFLAG00008188,CADAFLAG00010561,CADAFLAG00009842,CADAFLAG00001168,CADAFLAG00000915,CADAFLAG00011736,CADAFLAG00005048,CADAFLAG00007535,CADAFLAG00002780
GO:0016614	oxidoreductase activity, acting on CH-OH group of donors	molecular function	4.2057e-05	46	4(8.70%)	42(91.30%)	CADAFLAG00013027,CADAFLAG00008895,CADAFLAG00013256,CADAFLAG00009983	CADAFLAG00012568,CADAFLAG00007118,CADAFLAG00010436,CADAFLAG00013316,CADAFLAG00001659,CADAFLAG00006115,CADAFLAG00010255,CADAFLAG00001250,CADAFLAG00002264,CADAFLAG00007326,CADAFLAG00004657,CADAFLAG00006440,CADAFLAG00002335,CADAFLAG00001419,CADAFLAG00006084,CADAFLAG00003695,CADAFLAG00012635,CADAFLAG00000914,CADAFLAG00012215,CADAFLAG00006003,CADAFLAG00002883,CADAFLAG00006472,CADAFLAG00006001,CADAFLAG…
GO:0008152	metabolic process	biological process	4.2839e-05	691	192(27.79%)	499(72.21%)	CADAFLAG00006169,CADAFLAG00011485,CADAFLAG00004535,CADAFLAG00002231,CADAFLAG00006606,CADAFLAG00000966,CADAFLAG00007400,CADAFLAG00007396,CADAFLAG00007998,CADAFLAG00012908,CADAFLAG00004630,CADAFLAG00000442,CADAFLAG00001092,CADAFLAG00003254,CADAFLAG00005678,CADAFLAG00002341,CADAFLAG00012497,CADAFLAG00011168,CADAFLAG00010613,CADAFLAG00005240,CADAFLAG00000434,CADAFLAG00009748,CADAFLAG00001948,CADAFLAG…	CADAFLAG00012239,CADAFLAG00005468,CADAFLAG00010349,CADAFLAG00009842,CADAFLAG00006289,CADAFLAG00000089,CADAFLAG00000446,CADAFLAG00011074,CADAFLAG00001824,CADAFLAG00012745,CADAFLAG00000914,CADAFLAG00007362,CADAFLAG00005767,CADAFLAG00012568,CADAFLAG00005725,CADAFLAG00011806,CADAFLAG00004860,CADAFLAG00002264,CADAFLAG00001215,CADAFLAG00005014,CADAFLAG00001144,CADAFLAG00008172,CADAFLAG00006588,CADAFLAG…
GO:0050662	coenzyme binding	molecular function	4.3149e-05	90	18(20.00%)	72(80.00%)	CADAFLAG00009190,CADAFLAG00003055,CADAFLAG00008852,CADAFLAG00011324,CADAFLAG00007396,CADAFLAG00010601,CADAFLAG00005226,CADAFLAG00011372,CADAFLAG00011168,CADAFLAG00013027,CADAFLAG00011354,CADAFLAG00006430,CADAFLAG00001332,CADAFLAG00013256,CADAFLAG00009180,CADAFLAG00006658,CADAFLAG00009983,CADAFLAG00011009	CADAFLAG00005014,CADAFLAG00006115,CADAFLAG00002264,CADAFLAG00002532,CADAFLAG00011837,CADAFLAG00007326,CADAFLAG00008841,CADAFLAG00005725,CADAFLAG00012568,CADAFLAG00011821,CADAFLAG00008169,CADAFLAG00005434,CADAFLAG00003397,CADAFLAG00000264,CADAFLAG00004853,CADAFLAG00013316,CADAFLAG00000914,CADAFLAG00008547,CADAFLAG00003695,CADAFLAG00000507,CADAFLAG00009418,CADAFLAG00012887,CADAFLAG00006472,CADAFLAG…
GO:0019362	pyridine nucleotide metabolic process	biological process	4.4308e-05	16	0	16(100.00%)		CADAFLAG00009909,CADAFLAG00000914,CADAFLAG00012101,CADAFLAG00003695,CADAFLAG00006003,CADAFLAG00008188,CADAFLAG00006826,CADAFLAG00011568,CADAFLAG00000821,CADAFLAG00007326,CADAFLAG00006925,CADAFLAG00001960,CADAFLAG00012568,CADAFLAG00004375,CADAFLAG00010861,CADAFLAG00004666
GO:0016616	oxidoreductase activity, acting on the CH-OH group of donors, NAD or NADP as acceptor	molecular function	0.00010505	34	2(5.88%)	32(94.12%)	CADAFLAG00013027,CADAFLAG00008895	CADAFLAG00012568,CADAFLAG00007118,CADAFLAG00006115,CADAFLAG00002264,CADAFLAG00004657,CADAFLAG00007326,CADAFLAG00006440,CADAFLAG00002335,CADAFLAG00001419,CADAFLAG00006084,CADAFLAG00003695,CADAFLAG00012635,CADAFLAG00000914,CADAFLAG00012215,CADAFLAG00006003,CADAFLAG00006472,CADAFLAG00006001,CADAFLAG00006639,CADAFLAG00010861,CADAFLAG00004666,CADAFLAG00013014,CADAFLAG00001573,CADAFLAG00008581,CADAFLAG…
GO:0005976	polysaccharide metabolic process	biological process	0.00011105	18	3(16.67%)	15(83.33%)	CADAFLAG00003740,CADAFLAG00002955,CADAFLAG00012811	CADAFLAG00008709,CADAFLAG00010532,CADAFLAG00008039,CADAFLAG00004167,CADAFLAG00012922,CADAFLAG00005243,CADAFLAG00013016,CADAFLAG00009699,CADAFLAG00006960,CADAFLAG00002870,CADAFLAG00000915,CADAFLAG00012175,CADAFLAG00007943,CADAFLAG00005201,CADAFLAG00013197
GO:0072524	pyridine-containing compound metabolic process	biological process	0.0001427	16	0	16(100.00%)		CADAFLAG00007326,CADAFLAG00000821,CADAFLAG00006925,CADAFLAG00006826,CADAFLAG00011568,CADAFLAG00004375,CADAFLAG00004666,CADAFLAG00010861,CADAFLAG00001960,CADAFLAG00012568,CADAFLAG00006003,CADAFLAG00000914,CADAFLAG00009909,CADAFLAG00003695,CADAFLAG00012101,CADAFLAG00008188
GO:0016829	lyase activity	molecular function	0.0001453	54	10(18.52%)	44(81.48%)	CADAFLAG00011128,CADAFLAG00002099,CADAFLAG00012379,CADAFLAG00003465,CADAFLAG00004371,CADAFLAG00005824,CADAFLAG00011388,CADAFLAG00002621,CADAFLAG00006430,CADAFLAG00006137	CADAFLAG00002793,CADAFLAG00010212,CADAFLAG00003308,CADAFLAG00012769,CADAFLAG00004298,CADAFLAG00004285,CADAFLAG00000486,CADAFLAG00012176,CADAFLAG00008812,CADAFLAG00012567,CADAFLAG00002468,CADAFLAG00008509,CADAFLAG00000671,CADAFLAG00003850,CADAFLAG00008506,CADAFLAG00002780,CADAFLAG00012457,CADAFLAG00002440,CADAFLAG00005434,CADAFLAG00011231,CADAFLAG00006589,CADAFLAG00003041,CADAFLAG00006110,CADAFLAG…
GO:0010410	hemicellulose metabolic process	biological process	0.00017271	9	1(11.11%)	8(88.89%)	CADAFLAG00002955	CADAFLAG00008039,CADAFLAG00008709,CADAFLAG00007943,CADAFLAG00012175,CADAFLAG00012922,CADAFLAG00013016,CADAFLAG00006960,CADAFLAG00013197
GO:0045491	xylan metabolic process	biological process	0.00017271	9	1(11.11%)	8(88.89%)	CADAFLAG00002955	CADAFLAG00008039,CADAFLAG00008709,CADAFLAG00007943,CADAFLAG00012175,CADAFLAG00012922,CADAFLAG00013016,CADAFLAG00006960,CADAFLAG00013197
GO:0045493	xylan catabolic process	biological process	0.00017271	9	1(11.11%)	8(88.89%)	CADAFLAG00002955	CADAFLAG00013016,CADAFLAG00006960,CADAFLAG00013197,CADAFLAG00008039,CADAFLAG00008709,CADAFLAG00007943,CADAFLAG00012175,CADAFLAG00012922
GO:0009063	cellular amino acid catabolic process	biological process	0.00031808	16	0	16(100.00%)		CADAFLAG00010861,CADAFLAG00008730,CADAFLAG00006276,CADAFLAG00001960,CADAFLAG00005511,CADAFLAG00008169,CADAFLAG00002919,CADAFLAG00000057,CADAFLAG00005804,CADAFLAG00008308,CADAFLAG00009912,CADAFLAG00002495,CADAFLAG00011074,CADAFLAG00003019,CADAFLAG00005114,CADAFLAG00004313
GO:0006096	glycolysis	biological process	0.0003709	12	1(8.33%)	11(91.67%)	CADAFLAG00001568	CADAFLAG00006084,CADAFLAG00010065,CADAFLAG00012501,CADAFLAG00008361,CADAFLAG00003121,CADAFLAG00005566,CADAFLAG00001886,CADAFLAG00012567,CADAFLAG00002904,CADAFLAG00001824,CADAFLAG00002468
GO:0006520	cellular amino acid metabolic process	biological process	0.00056098	67	16(23.88%)	51(76.12%)	CADAFLAG00003002,CADAFLAG00004630,CADAFLAG00011573,CADAFLAG00010073,CADAFLAG00006137,CADAFLAG00006169,CADAFLAG00007672,CADAFLAG00004546,CADAFLAG00010039,CADAFLAG00011184,CADAFLAG00012379,CADAFLAG00002422,CADAFLAG00007292,CADAFLAG00004981,CADAFLAG00010652,CADAFLAG00011507	CADAFLAG00000871,CADAFLAG00000057,CADAFLAG00005804,CADAFLAG00004298,CADAFLAG00001960,CADAFLAG00006276,CADAFLAG00004666,CADAFLAG00004055,CADAFLAG00011144,CADAFLAG00005114,CADAFLAG00001117,CADAFLAG00001144,CADAFLAG00011307,CADAFLAG00009911,CADAFLAG00009912,CADAFLAG00006035,CADAFLAG00011806,CADAFLAG00012568,CADAFLAG00008169,CADAFLAG00006116,CADAFLAG00003397,CADAFLAG00007288,CADAFLAG00004313,CADAFLAG…
GO:0009081	branched-chain amino acid metabolic process	biological process	0.00067991	13	0	13(100.00%)		CADAFLAG00004666,CADAFLAG00013014,CADAFLAG00001144,CADAFLAG00004024,CADAFLAG00004998,CADAFLAG00012568,CADAFLAG00011055,CADAFLAG00006639,CADAFLAG00001245,CADAFLAG00004298,CADAFLAG00011144,CADAFLAG00005114,CADAFLAG00007288
GO:0006099	tricarboxylic acid cycle	biological process	0.00079832	11	0	11(100.00%)		CADAFLAG00011567,CADAFLAG00010853,CADAFLAG00001168,CADAFLAG00009842,CADAFLAG00012559,CADAFLAG00010931,CADAFLAG00010765,CADAFLAG00002780,CADAFLAG00008812,CADAFLAG00012136,CADAFLAG00011736
GO:0006732	coenzyme metabolic process	biological process	0.00095569	29	4(13.79%)	25(86.21%)	CADAFLAG00002082,CADAFLAG00013027,CADAFLAG00010652,CADAFLAG00002621	CADAFLAG00006003,CADAFLAG00008171,CADAFLAG00003695,CADAFLAG00012101,CADAFLAG00009909,CADAFLAG00000914,CADAFLAG00011307,CADAFLAG00008188,CADAFLAG00006925,CADAFLAG00007326,CADAFLAG00001215,CADAFLAG00000821,CADAFLAG00010765,CADAFLAG00002652,CADAFLAG00011568,CADAFLAG00006826,CADAFLAG00004666,CADAFLAG00010861,CADAFLAG00004375,CADAFLAG00009959,CADAFLAG00003397,CADAFLAG00012568,CADAFLAG00000620,CADAFLAG…
GO:1901605	alpha-amino acid metabolic process	biological process	0.0012547	40	12(30.00%)	28(70.00%)	CADAFLAG00004630,CADAFLAG00004546,CADAFLAG00012379,CADAFLAG00011184,CADAFLAG00007292,CADAFLAG00002422,CADAFLAG00007672,CADAFLAG00011507,CADAFLAG00004981,CADAFLAG00006169,CADAFLAG00010652,CADAFLAG00006137	CADAFLAG00004666,CADAFLAG00013014,CADAFLAG00004055,CADAFLAG00001960,CADAFLAG00008730,CADAFLAG00001245,CADAFLAG00000057,CADAFLAG00011307,CADAFLAG00009912,CADAFLAG00009911,CADAFLAG00001144,CADAFLAG00002464,CADAFLAG00011144,CADAFLAG00008169,CADAFLAG00012568,CADAFLAG00005511,CADAFLAG00006110,CADAFLAG00011806,CADAFLAG00002652,CADAFLAG00000058,CADAFLAG00006035,CADAFLAG00010458,CADAFLAG00008308,CADAFLAG…
GO:0045333	cellular respiration	biological process	0.0020429	15	0	15(100.00%)		CADAFLAG00010853,CADAFLAG00001168,CADAFLAG00009842,CADAFLAG00011567,CADAFLAG00010561,CADAFLAG00012559,CADAFLAG00010931,CADAFLAG00002114,CADAFLAG00002780,CADAFLAG00010765,CADAFLAG00007535,CADAFLAG00012136,CADAFLAG00011736,CADAFLAG00005048,CADAFLAG00008812
GO:0005991	trehalose metabolic process	biological process	0.0021223	7	0	7(100.00%)		CADAFLAG00001542,CADAFLAG00010349,CADAFLAG00012108,CADAFLAG00007016,CADAFLAG00002778,CADAFLAG00011234,CADAFLAG00001541
GO:0016051	carbohydrate biosynthetic process	biological process	0.0021327	13	0	13(100.00%)		CADAFLAG00002106,CADAFLAG00003121,CADAFLAG00001541,CADAFLAG00012108,CADAFLAG00003012,CADAFLAG00001542,CADAFLAG00007016,CADAFLAG00002468,CADAFLAG00004946,CADAFLAG00000915,CADAFLAG00010349,CADAFLAG00010532,CADAFLAG00002778
GO:1901615	organic hydroxy compound metabolic process	biological process	0.0021437	27	8(29.63%)	19(70.37%)	CADAFLAG00012730,CADAFLAG00013256,CADAFLAG00002940,CADAFLAG00008142,CADAFLAG00009983,CADAFLAG00009064,CADAFLAG00007166,CADAFLAG00011796	CADAFLAG00009810,CADAFLAG00000464,CADAFLAG00009567,CADAFLAG00010436,CADAFLAG00013316,CADAFLAG00010861,CADAFLAG00005767,CADAFLAG00003041,CADAFLAG00002883,CADAFLAG00002239,CADAFLAG00009170,CADAFLAG00006003,CADAFLAG00002319,CADAFLAG00002441,CADAFLAG00006588,CADAFLAG00008188,CADAFLAG00006440,CADAFLAG00008595,CADAFLAG00003689
GO:0006733	oxidoreduction coenzyme metabolic process	biological process	0.0024113	16	0	16(100.00%)		CADAFLAG00006003,CADAFLAG00003695,CADAFLAG00012101,CADAFLAG00009909,CADAFLAG00000914,CADAFLAG00008188,CADAFLAG00006925,CADAFLAG00000821,CADAFLAG00007326,CADAFLAG00011568,CADAFLAG00006826,CADAFLAG00010861,CADAFLAG00004666,CADAFLAG00004375,CADAFLAG00012568,CADAFLAG00001960
GO:0009082	branched-chain amino acid biosynthetic process	biological process	0.0034352	10	0	10(100.00%)		CADAFLAG00004298,CADAFLAG00001245,CADAFLAG00005114,CADAFLAG00007288,CADAFLAG00013014,CADAFLAG00011055,CADAFLAG00006639,CADAFLAG00001144,CADAFLAG00004024,CADAFLAG00004998
GO:0051186	cofactor metabolic process	biological process	0.0034352	31	4(12.90%)	27(87.10%)	CADAFLAG00010652,CADAFLAG00002082,CADAFLAG00013027,CADAFLAG00002621	CADAFLAG00011307,CADAFLAG00008188,CADAFLAG00010900,CADAFLAG00006003,CADAFLAG00008171,CADAFLAG00003695,CADAFLAG00012101,CADAFLAG00000914,CADAFLAG00003007,CADAFLAG00009909,CADAFLAG00004666,CADAFLAG00010861,CADAFLAG00009959,CADAFLAG00004375,CADAFLAG00003397,CADAFLAG00000620,CADAFLAG00012568,CADAFLAG00001960,CADAFLAG00010853,CADAFLAG00006925,CADAFLAG00007326,CADAFLAG00001215,CADAFLAG00000821,CADAFLAG…
GO:0016054	organic acid catabolic process	biological process	0.0038771	17	0(.00%)	17(100.00%)		CADAFLAG00009912,CADAFLAG00008308,CADAFLAG00002495,CADAFLAG00003019,CADAFLAG00011074,CADAFLAG00000507,CADAFLAG00005114,CADAFLAG00004313,CADAFLAG00010861,CADAFLAG00005511,CADAFLAG00008169,CADAFLAG00001960,CADAFLAG00006276,CADAFLAG00008730,CADAFLAG00002919,CADAFLAG00005804,CADAFLAG00000057
GO:0046395	carboxylic acid catabolic process	biological process	0.0038771	17	0(.00%)	17(100.00%)		CADAFLAG00000057,CADAFLAG00005804,CADAFLAG00002919,CADAFLAG00008169,CADAFLAG00005511,CADAFLAG00008730,CADAFLAG00006276,CADAFLAG00001960,CADAFLAG00010861,CADAFLAG00000507,CADAFLAG00004313,CADAFLAG00005114,CADAFLAG00003019,CADAFLAG00011074,CADAFLAG00002495,CADAFLAG00008308,CADAFLAG00009912
GO:0022891	substrate-specific transmembrane transporter activity	molecular function	0.0039632	95	64(67.37%)	31(32.63%)	CADAFLAG00010619,CADAFLAG00002341,CADAFLAG00001827,CADAFLAG00010966,CADAFLAG00003590,CADAFLAG00006614,CADAFLAG00008908,CADAFLAG00004795,CADAFLAG00003709,CADAFLAG00004562,CADAFLAG00000086,CADAFLAG00003176,CADAFLAG00005872,CADAFLAG00000373,CADAFLAG00003099,CADAFLAG00007817,CADAFLAG00011180,CADAFLAG00008517,CADAFLAG00008381,CADAFLAG00009747,CADAFLAG00004612,CADAFLAG00009755,CADAFLAG00007550,CADAFLAG…	CADAFLAG00005636,CADAFLAG00002864,CADAFLAG00007182,CADAFLAG00005048,CADAFLAG00001510,CADAFLAG00012212,CADAFLAG00007905,CADAFLAG00010561,CADAFLAG00011601,CADAFLAG00012544,CADAFLAG00000101,CADAFLAG00005038,CADAFLAG00012615,CADAFLAG00012525,CADAFLAG00009410,CADAFLAG00012369,CADAFLAG00008427,Novel00226,CADAFLAG00012181,CADAFLAG00007320,CADAFLAG00012271,CADAFLAG00003680,CADAFLAG00002114,CADAFLAG000044…
GO:0006098	pentose-phosphate shunt	biological process	0.0041448	9	0	9(100.00%)		CADAFLAG00009909,CADAFLAG00011568,CADAFLAG00003695,CADAFLAG00007326,CADAFLAG00000821,CADAFLAG00006925,CADAFLAG00012568,CADAFLAG00004375,CADAFLAG00004666
GO:0016835	carbon-oxygen lyase activity	molecular function	0.0045757	19	4(21.05%)	15(78.95%)	CADAFLAG00006137,CADAFLAG00012379,CADAFLAG00002621,CADAFLAG00002099	CADAFLAG00003121,CADAFLAG00010377,CADAFLAG00007288,CADAFLAG00002780,CADAFLAG00013364,CADAFLAG00009842,CADAFLAG00011055,CADAFLAG00004024,CADAFLAG00000486,CADAFLAG00004298,CADAFLAG00008812,CADAFLAG00010458,CADAFLAG00002793,CADAFLAG00006110,CADAFLAG00012769
GO:0051287	NAD binding	molecular function	0.0046552	20	0	20(100.00%)		CADAFLAG00001144,CADAFLAG00001419,CADAFLAG00000914,CADAFLAG00012215,CADAFLAG00005527,CADAFLAG00001886,CADAFLAG00012635,CADAFLAG00011935,CADAFLAG00002078,CADAFLAG00005566,CADAFLAG00006003,CADAFLAG00006472,CADAFLAG00006001,CADAFLAG00001573,CADAFLAG00013014,CADAFLAG00006115,CADAFLAG00007792,CADAFLAG00004657,CADAFLAG00002264,CADAFLAG00008581
GO:0006066	alcohol metabolic process	biological process	0.006229	23	7(30.43%)	16(69.57%)	CADAFLAG00009064,CADAFLAG00007166,CADAFLAG00011796,CADAFLAG00009983,CADAFLAG00013256,CADAFLAG00012730,CADAFLAG00002940	CADAFLAG00008188,CADAFLAG00006440,CADAFLAG00008595,CADAFLAG00003689,CADAFLAG00009170,CADAFLAG00002883,CADAFLAG00002239,CADAFLAG00002319,CADAFLAG00006003,CADAFLAG00002441,CADAFLAG00006588,CADAFLAG00010861,CADAFLAG00013316,CADAFLAG00005767,CADAFLAG00009810,CADAFLAG00000464
GO:0010383	cell wall polysaccharide metabolic process	biological process	0.006229	9	1(11.11%)	8(88.89%)	CADAFLAG00002955	CADAFLAG00008039,CADAFLAG00008709,CADAFLAG00007943,CADAFLAG00012922,CADAFLAG00012175,CADAFLAG00013016,CADAFLAG00006960,CADAFLAG00013197
GO:0044262	cellular carbohydrate metabolic process	biological process	0.006229	17	3(17.65%)	14(82.35%)	CADAFLAG00009064,CADAFLAG00007166,CADAFLAG00003740	CADAFLAG00000915,CADAFLAG00010349,CADAFLAG00002778,CADAFLAG00006084,CADAFLAG00007016,CADAFLAG00006003,CADAFLAG00011234,CADAFLAG00010532,CADAFLAG00005767,CADAFLAG00010931,CADAFLAG00012108,CADAFLAG00010765,CADAFLAG00001542,CADAFLAG00001541
GO:0005984	disaccharide metabolic process	biological process	0.0062749	7	0	7(100.00%)		CADAFLAG00012108,CADAFLAG00010349,CADAFLAG00001542,CADAFLAG00011234,CADAFLAG00007016,CADAFLAG00002778,CADAFLAG00001541
GO:0006637	acyl-CoA metabolic process	biological process	0.0071941	6	1(16.67%)	5(83.33%)	CADAFLAG00002082	CADAFLAG00001215,CADAFLAG00010853,CADAFLAG00010765,CADAFLAG00008171,CADAFLAG00000620
GO:0035383	thioester metabolic process	biological process	0.0071941	6	1(16.67%)	5(83.33%)	CADAFLAG00002082	CADAFLAG00001215,CADAFLAG00010765,CADAFLAG00000620,CADAFLAG00008171,CADAFLAG00010853
GO:0006739	NADP metabolic process	biological process	0.0071941	9	0	9(100.00%)		CADAFLAG00012568,CADAFLAG00004666,CADAFLAG00004375,CADAFLAG00003695,CADAFLAG00011568,CADAFLAG00009909,CADAFLAG00006925,CADAFLAG00000821,CADAFLAG00007326
GO:0006740	NADPH regeneration	biological process	0.0071941	9	0	9(100.00%)		CADAFLAG00012568,CADAFLAG00004375,CADAFLAG00004666,CADAFLAG00011568,CADAFLAG00009909,CADAFLAG00003695,CADAFLAG00000821,CADAFLAG00007326,CADAFLAG00006925
GO:0006072	glycerol-3-phosphate metabolic process	biological process	0.0071941	5	1(20.00%)	4(80.00%)	CADAFLAG00009868	CADAFLAG00001659,CADAFLAG00006003,CADAFLAG00002128,CADAFLAG00000914
GO:0052646	alditol phosphate metabolic process	biological process	0.0071941	5	1(20.00%)	4(80.00%)	CADAFLAG00009868	CADAFLAG00001659,CADAFLAG00006003,CADAFLAG00000914,CADAFLAG00002128
GO:0004499	N,N-dimethylaniline monooxygenase activity	molecular function	0.0071941	6	5(83.33%)	1(16.67%)	CADAFLAG00001332,CADAFLAG00011009,CADAFLAG00011372,CADAFLAG00009190,CADAFLAG00009180	CADAFLAG00012887
GO:0009060	aerobic respiration	biological process	0.0071941	12	0	12(100.00%)		CADAFLAG00010931,CADAFLAG00012559,CADAFLAG00011567,CADAFLAG00009842,CADAFLAG00010853,CADAFLAG00001168,CADAFLAG00008812,CADAFLAG00005048,CADAFLAG00011736,CADAFLAG00012136,CADAFLAG00002780,CADAFLAG00010765
GO:0005992	trehalose biosynthetic process	biological process	0.0071941	6	0	6(100.00%)		CADAFLAG00007016,CADAFLAG00002778,CADAFLAG00012108,CADAFLAG00010349,CADAFLAG00001542,CADAFLAG00001541
GO:0009312	oligosaccharide biosynthetic process	biological process	0.0071941	6	0	6(100.00%)		CADAFLAG00001541,CADAFLAG00012108,CADAFLAG00010349,CADAFLAG00001542,CADAFLAG00007016,CADAFLAG00002778
GO:0046351	disaccharide biosynthetic process	biological process	0.0071941	6	0	6(100.00%)		CADAFLAG00002778,CADAFLAG00007016,CADAFLAG00010349,CADAFLAG00001542,CADAFLAG00012108,CADAFLAG00001541
GO:0019566	arabinose metabolic process	biological process	0.0071941	8	0	8(100.00%)		CADAFLAG00004326,CADAFLAG00005768,CADAFLAG00003452,CADAFLAG00002335,CADAFLAG00008426,CADAFLAG00006958,CADAFLAG00004167,CADAFLAG00008663
GO:0016836	hydro-lyase activity	molecular function	0.008316	16	4(25.00%)	12(75.00%)	CADAFLAG00006137,CADAFLAG00012379,CADAFLAG00002621,CADAFLAG00002099	CADAFLAG00003121,CADAFLAG00010377,CADAFLAG00007288,CADAFLAG00002780,CADAFLAG00013364,CADAFLAG00011055,CADAFLAG00009842,CADAFLAG00004024,CADAFLAG00004298,CADAFLAG00008812,CADAFLAG00002793,CADAFLAG00006110
GO:0048037	cofactor binding	molecular function	0.0092997	121	28(23.14%)	93(76.86%)	CADAFLAG00007396,CADAFLAG00010635,CADAFLAG00002119,CADAFLAG00010601,CADAFLAG00003055,CADAFLAG00009190,CADAFLAG00008852,CADAFLAG00000722,CADAFLAG00003740,CADAFLAG00011324,CADAFLAG00009189,CADAFLAG00013240,CADAFLAG00013256,CADAFLAG00009180,CADAFLAG00008122,CADAFLAG00013400,CADAFLAG00009983,CADAFLAG00006658,CADAFLAG00011009,CADAFLAG00012379,CADAFLAG00005226,CADAFLAG00011372,CADAFLAG00011168,CADAFLAG…	CADAFLAG00006295,CADAFLAG00003585,CADAFLAG00006925,CADAFLAG00001837,CADAFLAG00006425,CADAFLAG00002186,CADAFLAG00001960,CADAFLAG00006276,CADAFLAG00006001,CADAFLAG00004666,CADAFLAG00001573,CADAFLAG00004055,CADAFLAG00005527,CADAFLAG00001886,CADAFLAG00005518,CADAFLAG00009909,CADAFLAG00001117,CADAFLAG00010019,CADAFLAG00001727,CADAFLAG00002185,CADAFLAG00001144,CADAFLAG00006370,CADAFLAG00005365,CADAFLAG…
GO:0019321	pentose metabolic process	biological process	0.014694	9	0	9(100.00%)		CADAFLAG00008426,CADAFLAG00002335,CADAFLAG00008663,CADAFLAG00004167,CADAFLAG00006958,CADAFLAG00004375,CADAFLAG00005768,CADAFLAG00004326,CADAFLAG00003452
GO:0022857	transmembrane transporter activity	molecular function	0.016035	106	70(66.04%)	36(33.96%)	CADAFLAG00007740,CADAFLAG00001229,CADAFLAG00005689,CADAFLAG00010899,CADAFLAG00005950,CADAFLAG00001107,CADAFLAG00008706,CADAFLAG00004227,CADAFLAG00001549,CADAFLAG00009455,CADAFLAG00009624,CADAFLAG00012869,CADAFLAG00004101,CADAFLAG00007897,CADAFLAG00011233,CADAFLAG00010240,CADAFLAG00008851,CADAFLAG00007761,CADAFLAG00000139,CADAFLAG00008208,CADAFLAG00004550,CADAFLAG00010822,CADAFLAG00000570,CADAFLAG…	CADAFLAG00004411,CADAFLAG00002114,CADAFLAG00010438,CADAFLAG00003680,CADAFLAG00012271,CADAFLAG00003054,CADAFLAG00005160,CADAFLAG00005158,CADAFLAG00010764,CADAFLAG00004642,CADAFLAG00006216,CADAFLAG00004747,CADAFLAG00008702,CADAFLAG00011601,CADAFLAG00001212,CADAFLAG00012544,CADAFLAG00000101,CADAFLAG00008735,CADAFLAG00005048,CADAFLAG00005636,CADAFLAG00002864,CADAFLAG00007182,CADAFLAG00007905,CADAFLAG…
GO:1901564	organonitrogen compound metabolic process	biological process	0.016035	113	33(29.20%)	80(70.80%)	CADAFLAG00006668,CADAFLAG00003254,CADAFLAG00003002,CADAFLAG00004630,CADAFLAG00002057,CADAFLAG00004914,CADAFLAG00011573,CADAFLAG00002621,CADAFLAG00010073,CADAFLAG00006137,CADAFLAG00010899,CADAFLAG00001139,CADAFLAG00009624,CADAFLAG00007672,CADAFLAG00006169,CADAFLAG00004546,CADAFLAG00008571,CADAFLAG00010039,CADAFLAG00011128,CADAFLAG00000167,CADAFLAG00001172,CADAFLAG00011184,CADAFLAG00012379,CADAFLAG…	CADAFLAG00006925,CADAFLAG00006425,CADAFLAG00004298,CADAFLAG00000871,CADAFLAG00013394,CADAFLAG00005804,CADAFLAG00000057,CADAFLAG00004666,CADAFLAG00002793,CADAFLAG00004055,CADAFLAG00001960,CADAFLAG00006677,CADAFLAG00006276,CADAFLAG00004747,CADAFLAG00007681,CADAFLAG00001853,CADAFLAG00001117,CADAFLAG00011144,CADAFLAG00005114,CADAFLAG00009909,CADAFLAG00011307,CADAFLAG00009912,CADAFLAG00009911,CADAFLAG…
GO:0003674	molecular function	molecular function	0.016636	1069	386(36.11%)	683(63.89%)	CADAFLAG00003465,CADAFLAG00011104,CADAFLAG00006154,CADAFLAG00011184,CADAFLAG00002082,CADAFLAG00009983,CADAFLAG00001161,CADAFLAG00000266,CADAFLAG00008284,CADAFLAG00004300,CADAFLAG00008122,CADAFLAG00005366,CADAFLAG00002269,CADAFLAG00009868,CADAFLAG00001863,CADAFLAG00003590,CADAFLAG00011372,CADAFLAG00009684,CADAFLAG00003985,CADAFLAG00004392,CADAFLAG00008955,CADAFLAG00002251,CADAFLAG00002099,CADAFLAG…	Novel00388,CADAFLAG00002230,CADAFLAG00012158,CADAFLAG00013235,CADAFLAG00008506,CADAFLAG00010261,CADAFLAG00005038,CADAFLAG00004089,CADAFLAG00006057,CADAFLAG00002314,CADAFLAG00005471,CADAFLAG00007320,CADAFLAG00011055,CADAFLAG00011712,CADAFLAG00001419,CADAFLAG00008617,CADAFLAG00002864,CADAFLAG00011862,CADAFLAG00004926,CADAFLAG00006589,CADAFLAG00007371,CADAFLAG00012138,CADAFLAG00010352,CADAFLAG000012…
GO:0034599	cellular response to oxidative stress	biological process	0.018109	8	1(12.50%)	7(87.50%)	CADAFLAG00011168	CADAFLAG00011762,CADAFLAG00002335,CADAFLAG00008944,CADAFLAG00006226,CADAFLAG00005768,CADAFLAG00001117,CADAFLAG00002319
GO:1901606	alpha-amino acid catabolic process	biological process	0.021268	10	0	10(100.00%)		CADAFLAG00004313,CADAFLAG00000057,CADAFLAG00003019,CADAFLAG00005511,CADAFLAG00002495,CADAFLAG00008169,CADAFLAG00001960,CADAFLAG00008730,CADAFLAG00009912,CADAFLAG00008308
GO:0022892	substrate-specific transporter activity	molecular function	0.025898	96	65(67.71%)	31(32.29%)	CADAFLAG00010062,CADAFLAG00000435,CADAFLAG00000996,CADAFLAG00006494,CADAFLAG00012003,CADAFLAG00005799,CADAFLAG00006814,CADAFLAG00000167,CADAFLAG00002750,CADAFLAG00005366,CADAFLAG00004632,CADAFLAG00007550,CADAFLAG00003843,CADAFLAG00008284,CADAFLAG00000266,CADAFLAG00006475,CADAFLAG00000538,CADAFLAG00000373,CADAFLAG00003176,CADAFLAG00005872,CADAFLAG00000086,CADAFLAG00004562,CADAFLAG00011180,CADAFLAG…	CADAFLAG00008427,Novel00226,CADAFLAG00012369,CADAFLAG00007320,CADAFLAG00012181,CADAFLAG00012615,CADAFLAG00005038,CADAFLAG00012525,CADAFLAG00009410,CADAFLAG00011601,CADAFLAG00012544,CADAFLAG00000101,CADAFLAG00007182,CADAFLAG00005636,CADAFLAG00002864,CADAFLAG00005048,CADAFLAG00001510,CADAFLAG00012212,CADAFLAG00010561,CADAFLAG00007905,CADAFLAG00010764,CADAFLAG00005158,CADAFLAG00004642,CADAFLAG000062…
GO:0042775	mitochondrial ATP synthesis coupled electron transport	biological process	0.026977	4	0(.00%)	4(100.00%)		CADAFLAG00005048,CADAFLAG00010561,CADAFLAG00007535,CADAFLAG00002114
GO:0015849	organic acid transport	biological process	0.026977	26	21(80.77%)	5(19.23%)	CADAFLAG00000373,CADAFLAG00000139,CADAFLAG00000086,CADAFLAG00006494,CADAFLAG00010240,CADAFLAG00008381,CADAFLAG00001229,CADAFLAG00006814,CADAFLAG00009755,CADAFLAG00005366,CADAFLAG00007740,CADAFLAG00004612,CADAFLAG00008706,CADAFLAG00008456,CADAFLAG00001107,CADAFLAG00001549,CADAFLAG00000266,CADAFLAG00005950,CADAFLAG00006614,CADAFLAG00000538,CADAFLAG00004795	CADAFLAG00011601,CADAFLAG00010764,CADAFLAG00012615,CADAFLAG00001510,CADAFLAG00009410
GO:0046942	carboxylic acid transport	biological process	0.026977	26	21(80.77%)	5(19.23%)	CADAFLAG00005950,CADAFLAG00000266,CADAFLAG00008706,CADAFLAG00008456,CADAFLAG00001107,CADAFLAG00001549,CADAFLAG00004795,CADAFLAG00006614,CADAFLAG00000538,CADAFLAG00010240,CADAFLAG00000373,CADAFLAG00000139,CADAFLAG00000086,CADAFLAG00006494,CADAFLAG00009755,CADAFLAG00007740,CADAFLAG00005366,CADAFLAG00004612,CADAFLAG00008381,CADAFLAG00001229,CADAFLAG00006814	CADAFLAG00012615,CADAFLAG00009410,CADAFLAG00001510,CADAFLAG00011601,CADAFLAG00010764
GO:0006094	gluconeogenesis	biological process	0.029712	5	0	5(100.00%)		CADAFLAG00003121,CADAFLAG00002106,CADAFLAG00004946,CADAFLAG00002468,CADAFLAG00003012
GO:0009065	glutamine family amino acid catabolic process	biological process	0.032798	4	0	4(100.00%)		CADAFLAG00008730,CADAFLAG00000057,CADAFLAG00002495,CADAFLAG00009912
GO:0009098	leucine biosynthetic process	biological process	0.032798	4	0	4(100.00%)		CADAFLAG00013014,CADAFLAG00001245,CADAFLAG00007288,CADAFLAG00001144
GO:0006116	NADH oxidation	biological process	0.032798	4	0	4(100.00%)		CADAFLAG00000914,CADAFLAG00008188,CADAFLAG00010861,CADAFLAG00006003
GO:0006734	NADH metabolic process	biological process	0.032798	4	0	4(100.00%)		CADAFLAG00000914,CADAFLAG00008188,CADAFLAG00006003,CADAFLAG00010861
GO:0005215	transporter activity	molecular function	0.03349	121	80(66.12%)	41(33.88%)	CADAFLAG00003764,CADAFLAG00008434,CADAFLAG00008456,CADAFLAG00008851,CADAFLAG00011233,CADAFLAG00010240,CADAFLAG00007761,CADAFLAG00000139,CADAFLAG00008208,CADAFLAG00012808,CADAFLAG00010822,CADAFLAG00004550,CADAFLAG00000570,CADAFLAG00010899,CADAFLAG00005689,CADAFLAG00005950,CADAFLAG00008706,CADAFLAG00001107,CADAFLAG00012768,CADAFLAG00009455,CADAFLAG00001549,CADAFLAG00004227,CADAFLAG00004101,CADAFLAG…	CADAFLAG00004747,CADAFLAG00008702,CADAFLAG00004010,CADAFLAG00003054,CADAFLAG00007743,CADAFLAG00005160,CADAFLAG00010764,CADAFLAG00005158,CADAFLAG00004642,CADAFLAG00006216,CADAFLAG00003680,CADAFLAG00012271,CADAFLAG00004411,CADAFLAG00002114,CADAFLAG00011061,CADAFLAG00010438,CADAFLAG00012615,CADAFLAG00005038,CADAFLAG00009410,CADAFLAG00012525,CADAFLAG00007320,CADAFLAG00012181,CADAFLAG00008427,Novel002…
GO:0016877	ligase activity, forming carbon-sulfur bonds	molecular function	0.03349	4	1(25.00%)	3(75.00%)	CADAFLAG00002082	CADAFLAG00000701,CADAFLAG00010853,CADAFLAG00008203
GO:0016878	acid-thiol ligase activity	molecular function	0.03349	4	1(25.00%)	3(75.00%)	CADAFLAG00002082	CADAFLAG00000701,CADAFLAG00008203,CADAFLAG00010853
GO:0008410	CoA-transferase activity	molecular function	0.03349	4	0	4(100.00%)		CADAFLAG00000620,CADAFLAG00002249,CADAFLAG00008617,CADAFLAG00011252
GO:0005342	organic acid transmembrane transporter activity	molecular function	0.035855	26	21(80.77%)	5(19.23%)	CADAFLAG00006814,CADAFLAG00001229,CADAFLAG00008381,CADAFLAG00004612,CADAFLAG00005366,CADAFLAG00007740,CADAFLAG00009755,CADAFLAG00006494,CADAFLAG00000086,CADAFLAG00000139,CADAFLAG00000373,CADAFLAG00010240,CADAFLAG00000538,CADAFLAG00006614,CADAFLAG00004795,CADAFLAG00001549,CADAFLAG00008456,CADAFLAG00001107,CADAFLAG00008706,CADAFLAG00005950,CADAFLAG00000266	CADAFLAG00010764,CADAFLAG00011601,CADAFLAG00001510,CADAFLAG00009410,CADAFLAG00012615
GO:0046943	carboxylic acid transmembrane transporter activity	molecular function	0.035855	26	21(80.77%)	5(19.23%)	CADAFLAG00006494,CADAFLAG00000086,CADAFLAG00000139,CADAFLAG00000373,CADAFLAG00010240,CADAFLAG00006814,CADAFLAG00001229,CADAFLAG00008381,CADAFLAG00004612,CADAFLAG00007740,CADAFLAG00005366,CADAFLAG00009755,CADAFLAG00001549,CADAFLAG00008456,CADAFLAG00001107,CADAFLAG00008706,CADAFLAG00005950,CADAFLAG00000266,CADAFLAG00000538,CADAFLAG00006614,CADAFLAG00004795	CADAFLAG00011601,CADAFLAG00010764,CADAFLAG00012615,CADAFLAG00001510,CADAFLAG00009410
GO:0009055	electron carrier activity	molecular function	0.039314	77	30(38.96%)	47(61.04%)	CADAFLAG00001332,CADAFLAG00001783,CADAFLAG00008785,CADAFLAG00010613,CADAFLAG00011168,CADAFLAG00007600,CADAFLAG00007987,CADAFLAG00009867,CADAFLAG00012678,CADAFLAG00004300,CADAFLAG00005854,CADAFLAG00002940,CADAFLAG00001506,CADAFLAG00011124,CADAFLAG00011485,CADAFLAG00004365,CADAFLAG00009720,CADAFLAG00008852,CADAFLAG00009190,CADAFLAG00011796,CADAFLAG00003985,CADAFLAG00012857,CADAFLAG00003237,CADAFLAG…	CADAFLAG00007133,CADAFLAG00007682,CADAFLAG00006350,CADAFLAG00002239,CADAFLAG00006294,CADAFLAG00010459,CADAFLAG00000349,CADAFLAG00010352,CADAFLAG00000919,CADAFLAG00013238,CADAFLAG00006110,CADAFLAG00012797,CADAFLAG00003427,CADAFLAG00001250,CADAFLAG00010894,CADAFLAG00000510,CADAFLAG00002464,CADAFLAG00002720,CADAFLAG00011736,CADAFLAG00009409,CADAFLAG00003615,CADAFLAG00004663,CADAFLAG00000237,CADAFLAG…
GO:0051536	iron-sulfur cluster binding	molecular function	0.039314	15	1(6.67%)	14(93.33%)	CADAFLAG00007600	CADAFLAG00006110,CADAFLAG00010900,CADAFLAG00009842,CADAFLAG00002299,CADAFLAG00012559,CADAFLAG00008547,CADAFLAG00007288,CADAFLAG00002780,CADAFLAG00003427,CADAFLAG00000380,CADAFLAG00002046,CADAFLAG00002078,CADAFLAG00009409,CADAFLAG00002720
GO:0051540	metal cluster binding	molecular function	0.039314	15	1(6.67%)	14(93.33%)	CADAFLAG00007600	CADAFLAG00006110,CADAFLAG00010900,CADAFLAG00009842,CADAFLAG00012559,CADAFLAG00002299,CADAFLAG00003427,CADAFLAG00002780,CADAFLAG00000380,CADAFLAG00007288,CADAFLAG00008547,CADAFLAG00002720,CADAFLAG00002046,CADAFLAG00002078,CADAFLAG00009409
GO:0055085	transmembrane transport	biological process	0.04005	39	20(51.28%)	19(48.72%)	CADAFLAG00003843,CADAFLAG00008208,CADAFLAG00005799,CADAFLAG00004550,CADAFLAG00007761,CADAFLAG00012003,CADAFLAG00000996,CADAFLAG00012869,CADAFLAG00007897,CADAFLAG00005689,CADAFLAG00010966,CADAFLAG00003590,CADAFLAG00004227,CADAFLAG00001549,CADAFLAG00001827,CADAFLAG00010619,CADAFLAG00009747,CADAFLAG00003099,CADAFLAG00011180,CADAFLAG00003176	CADAFLAG00012525,CADAFLAG00004747,CADAFLAG00008702,CADAFLAG00006216,CADAFLAG00004642,CADAFLAG00012181,CADAFLAG00007320,Novel00226,CADAFLAG00007905,CADAFLAG00012212,CADAFLAG00012271,CADAFLAG00002864,CADAFLAG00005636,CADAFLAG00000101,CADAFLAG00008735,CADAFLAG00010438,CADAFLAG00012544,CADAFLAG00001212,CADAFLAG00004411
GO:0008652	cellular amino acid biosynthetic process	biological process	0.042764	32	7(21.88%)	25(78.13%)	CADAFLAG00004981,CADAFLAG00006169,CADAFLAG00010652,CADAFLAG00006137,CADAFLAG00002422,CADAFLAG00011184,CADAFLAG00004546	CADAFLAG00004024,CADAFLAG00004998,CADAFLAG00011055,CADAFLAG00003019,CADAFLAG00000060,CADAFLAG00007288,CADAFLAG00003397,CADAFLAG00009959,CADAFLAG00006110,CADAFLAG00011806,CADAFLAG00000058,CADAFLAG00010458,CADAFLAG00011307,CADAFLAG00009912,CADAFLAG00009911,CADAFLAG00001144,CADAFLAG00002464,CADAFLAG00005114,CADAFLAG00013014,CADAFLAG00004055,CADAFLAG00008730,CADAFLAG00006639,CADAFLAG00001245,CADAFLAG…
GO:0015075	ion transmembrane transporter activity	molecular function	0.042764	77	53(68.83%)	24(31.17%)	CADAFLAG00007897,CADAFLAG00004101,CADAFLAG00012869,CADAFLAG00009624,CADAFLAG00001549,CADAFLAG00004227,CADAFLAG00008706,CADAFLAG00001107,CADAFLAG00005950,CADAFLAG00010899,CADAFLAG00001229,CADAFLAG00007740,CADAFLAG00008456,CADAFLAG00003764,CADAFLAG00000570,CADAFLAG00010822,CADAFLAG00008208,CADAFLAG00000139,CADAFLAG00007761,CADAFLAG00008851,CADAFLAG00011233,CADAFLAG00010240,CADAFLAG00008908,CADAFLAG…	CADAFLAG00003680,CADAFLAG00010438,CADAFLAG00002114,CADAFLAG00004411,CADAFLAG00008702,CADAFLAG00004747,CADAFLAG00006216,CADAFLAG00004642,CADAFLAG00010764,CADAFLAG00005158,CADAFLAG00001510,CADAFLAG00012212,CADAFLAG00010561,CADAFLAG00007182,CADAFLAG00005048,CADAFLAG00011601,CADAFLAG00012544,CADAFLAG00009410,CADAFLAG00005038,CADAFLAG00012615,CADAFLAG00012369,CADAFLAG00008427,Novel00226,CADAFLAG000121…
GO:0046373	L-arabinose metabolic process	biological process	0.042764	6	0	6(100.00%)		CADAFLAG00004326,CADAFLAG00008426,CADAFLAG00006958,CADAFLAG00004167,CADAFLAG00003452,CADAFLAG00008663
GO:0046556	alpha-N-arabinofuranosidase activity	molecular function	0.042764	6	0	6(100.00%)		CADAFLAG00008663,CADAFLAG00003452,CADAFLAG00006958,CADAFLAG00004167,CADAFLAG00008426,CADAFLAG00004326
GO:0009069	serine family amino acid metabolic process	biological process	0.046924	9	1(11.11%)	8(88.89%)	CADAFLAG00011507	CADAFLAG00008308,CADAFLAG00004055,CADAFLAG00008169,CADAFLAG00005511,CADAFLAG00011806,CADAFLAG00010458,CADAFLAG00006035,CADAFLAG00004313
Total DEGs with GO annotation				1113

## Sheet: af_R_T3 vs af_R_T2
GO ID	Term	Categories	q value	DEGs amount	Up-regulated DEGs	Down-regulated DEGs	Up-regulated DEGs list	Down-regulated DEGs list
GO:0044710	single-organism metabolic process	biological process	0.0004233	82	45(54.88%)	37(45.12%)	CADAFLAG00003716,CADAFLAG00010915,CADAFLAG00003308,CADAFLAG00009909,CADAFLAG00009624,CADAFLAG00003740,CADAFLAG00007396,CADAFLAG00009181,CADAFLAG00007804,CADAFLAG00006226,CADAFLAG00008581,CADAFLAG00003215,CADAFLAG00000167,CADAFLAG00006003,CADAFLAG00013205,CADAFLAG00004300,CADAFLAG00002566,CADAFLAG00012817,CADAFLAG00004001,CADAFLAG00009720,CADAFLAG00007813,CADAFLAG00006864,CADAFLAG00010501,CADAFLAG…	CADAFLAG00009170,CADAFLAG00007535,CADAFLAG00009567,CADAFLAG00011762,CADAFLAG00001573,CADAFLAG00002264,CADAFLAG00012730,CADAFLAG00010561,CADAFLAG00009697,CADAFLAG00004747,CADAFLAG00006370,CADAFLAG00007978,CADAFLAG00000237,CADAFLAG00008169,CADAFLAG00006035,CADAFLAG00006276,CADAFLAG00006115,CADAFLAG00003007,CADAFLAG00002114,CADAFLAG00002249,CADAFLAG00008308,CADAFLAG00012577,CADAFLAG00005114,CADAFLAG…
GO:0016491	oxidoreductase activity	molecular function	0.0030122	83	49(59.04%)	34(40.96%)	CADAFLAG00002813,CADAFLAG00008581,CADAFLAG00006226,CADAFLAG00003215,CADAFLAG00007396,CADAFLAG00009181,CADAFLAG00007804,CADAFLAG00010352,CADAFLAG00010950,CADAFLAG00009684,CADAFLAG00009825,CADAFLAG00012817,CADAFLAG00006003,CADAFLAG00013205,CADAFLAG00004300,CADAFLAG00007952,CADAFLAG00011862,CADAFLAG00009909,CADAFLAG00006427,CADAFLAG00002976,CADAFLAG00012908,CADAFLAG00010736,CADAFLAG00010915,CADAFLAG…	CADAFLAG00000237,CADAFLAG00002363,CADAFLAG00009697,CADAFLAG00006370,CADAFLAG00003434,CADAFLAG00007182,CADAFLAG00002114,CADAFLAG00007875,CADAFLAG00003007,CADAFLAG00006115,CADAFLAG00009567,CADAFLAG00011762,CADAFLAG00009170,CADAFLAG00005532,CADAFLAG00000349,CADAFLAG00010561,CADAFLAG00002264,CADAFLAG00012730,CADAFLAG00001573,CADAFLAG00000959,CADAFLAG00002988,CADAFLAG00003661,CADAFLAG00001754,CADAFLAG…
GO:0055114	oxidation-reduction process	biological process	0.0037764	46	28(60.87%)	18(39.13%)	CADAFLAG00005854,CADAFLAG00003740,CADAFLAG00000163,CADAFLAG00007804,CADAFLAG00009181,CADAFLAG00010459,CADAFLAG00008581,CADAFLAG00003215,CADAFLAG00006226,CADAFLAG00007802,CADAFLAG00013205,CADAFLAG00006003,CADAFLAG00004300,CADAFLAG00010613,CADAFLAG00012817,CADAFLAG00004001,CADAFLAG00010915,CADAFLAG00009720,CADAFLAG00009909,CADAFLAG00002904,CADAFLAG00011608,CADAFLAG00001880,CADAFLAG00001837,CADAFLAG…	CADAFLAG00009697,CADAFLAG00006370,CADAFLAG00001754,CADAFLAG00000237,CADAFLAG00006115,CADAFLAG00010765,CADAFLAG00002114,CADAFLAG00012577,CADAFLAG00010167,CADAFLAG00007535,CADAFLAG00009567,CADAFLAG00011762,CADAFLAG00006240,CADAFLAG00012635,CADAFLAG00001573,CADAFLAG00002264,CADAFLAG00012730,CADAFLAG00010561
GO:0005975	carbohydrate metabolic process	biological process	0.0087353	32	15(46.88%)	17(53.13%)	CADAFLAG00005655,CADAFLAG00002565,CADAFLAG00007016,CADAFLAG00003740,CADAFLAG00007166,CADAFLAG00004860,CADAFLAG00002955,CADAFLAG00006003,CADAFLAG00009909,CADAFLAG00011970,CADAFLAG00011917,CADAFLAG00002904,CADAFLAG00007273,CADAFLAG00009748,CADAFLAG00003304	CADAFLAG00005201,CADAFLAG00009851,CADAFLAG00008663,CADAFLAG00011527,CADAFLAG00003595,CADAFLAG00001722,CADAFLAG00010765,CADAFLAG00010255,CADAFLAG00001019,CADAFLAG00011938,CADAFLAG00001327,CADAFLAG00013197,CADAFLAG00001853,CADAFLAG00002291,CADAFLAG00012180,CADAFLAG00007943,CADAFLAG00004328
GO:0003824	catalytic activity	molecular function	0.022912	199	113(56.78%)	86(43.22%)	CADAFLAG00012327,CADAFLAG00013205,CADAFLAG00006430,CADAFLAG00006003,CADAFLAG00013203,CADAFLAG00012817,CADAFLAG00009684,CADAFLAG00012612,CADAFLAG00003465,CADAFLAG00010950,CADAFLAG00010352,CADAFLAG00003740,CADAFLAG00009181,CADAFLAG00007804,CADAFLAG00000167,CADAFLAG00003215,CADAFLAG00007816,CADAFLAG00005549,CADAFLAG00009084,CADAFLAG00007273,CADAFLAG00003716,CADAFLAG00011970,CADAFLAG00010915,CADAFLAG…	CADAFLAG00001753,CADAFLAG00003007,CADAFLAG00002114,CADAFLAG00003595,CADAFLAG00008308,CADAFLAG00003434,CADAFLAG00007182,CADAFLAG00001722,CADAFLAG00009697,CADAFLAG00007978,CADAFLAG00005201,CADAFLAG00002363,CADAFLAG00010152,CADAFLAG00008663,CADAFLAG00001573,CADAFLAG00012730,CADAFLAG00010561,CADAFLAG00007751,CADAFLAG00005532,CADAFLAG00001019,CADAFLAG00001853,CADAFLAG00002156,CADAFLAG00011762,CADAFLAG…
Total DEGs with GO annotation				263
