# Supplementary material for: Functional Genomic Analysis of Aspergillus flavus Interacting with Resistant and Susceptible Peanut
Source: MDPI journal article supplement (doi:10.3390/toxins8020046), 2016-02-15
Supplement: s1 [file toxins-114703-Table S7.xlsx]

## Sheet: Secondary metabolite clusters
Cluster	Gene ID	Gene Name	Readcount (C1)		Readcount (C2)		Readcount (C3)		Readcount (C4)		Log2 (foldchange)				q value				Annotated gene function
			af_R_T2	af_S_T2	af_R_T3	af_S_T3	af_R_T3	af_R_T2	af_S_T3	af_S_T2	C1	C2	C3	C4	C1	C2	C3	C4
1	CADAFLAG00010356	AFLA_002900	44.6448	75.5135	350.898	272.764	217.958	117.369	103.037	121.992	-0.75824	0.3634	0.893	-0.24363	1	0.43246	0.74228	1	polyketide synthase, putative
1	CADAFLAG00010357	AFLA_002910	7.15789	9.23477	43.7996	45.7312	27.2041	18.8384	17.2647	14.9	-0.36754	-0.06226	0.53015	0.21251	1	1	1	1	conserved hypothetical protein
1	CADAFLAG00010358	AFLA_002920	0	0.435492	0.195232	0	0.121199	0	0	0.693116					1	1	1	1	flavonoid 3-hydroxylase, putative
2	CADAFLAG00010502	AFLA_004360	4.8128	7.27653	25.5733	47.459	15.884	12.724	17.9334	11.9097	-0.59637	-0.89204	0.32003	0.59052	1	0.59615	1	1	alcohol dehydrogenase, putative
2	CADAFLAG00010503	AFLA_004370	33.9284	38.0784	132.748	167.758	82.4502	89.1936	63.3807	62.0199	-0.16648	-0.3377	-0.11342	0.031313	1	0.81864	1	1	cytochrome P450 oxidoreductase, putative
2	CADAFLAG00010504	AFLA_004380	1.21342	2.98503	25.2079	23.3593	15.6585	3.22225	8.82341	4.91517	-1.2987	0.10988	2.2808	0.8441	1	1	1	1	xylosidase : arabinofuranosidase, putative
2	CADAFLAG00010505	AFLA_004390	0	0	0.689571	0	0.428403	0	0	0						1	1		conserved hypothetical protein
2	CADAFLAG00010506	AFLA_004400	7.23965	6.03347	10.6356	13.0728	6.60562	19.1685	4.93173	9.76698	0.26293	-0.29768	-1.537	-0.98582	1	1	1	1	trypsin Inhibitor like cysteine rich domain containing protein
2	CADAFLAG00010507	AFLA_004410	0	1.30648	51.8847	49.4812	32.2257	0	18.6905	2.07935		0.068428		3.1681	1	1	0.2825	0.094007	conserved hypothetical protein
2	CADAFLAG00010508	AFLA_004420	19.7353	13.7887	39.7606	26.1219	24.6965	52.0119	9.86708	22.4134	0.51729	0.60608	-1.0745	-1.1837	1	0.89835	1	1	phospholipase D precursor, putative
2	CADAFLAG00010509	AFLA_004430	0	0	3.34398	3.0095	2.07721	0	1.1392	0		0.15204				1	1	1	conserved hypothetical protein
2	CADAFLAG00010510	AFLA_004440	0	0.435492	1.04958	0	0.652003	0	0	0.693116		0			1	1	1	1	ABC multidrug transporter, putative
2	CADAFLAG00010511	AFLA_004450	7.72371	3.65989	7.23069	4.26742	4.49081	20.2845	1.61327	5.97663	1.0775	0.76077	-2.1753	-1.8893	1	1	1	1	nonribosomal peptide synthase (NRPS), putative
3	CADAFLAG00010594	AFLA_005290	6.59206	4.61739	16.6035	14.5776	10.3128	17.3923	5.50134	7.45	0.51365	0.18774	-0.75401	-0.43746	1	1	1	1	conserved hypothetical protein
3	CADAFLAG00010595	AFLA_005300	0	0	0.16478	0	0.102401	0	0	0						1	1		ankyrin repeat-containing protein, putative
3	CADAFLAG00010596	AFLA_005310	0	0	2.88009	0	1.7888	0	0	0						1	1		vacuolar ATP synthase proteolipid subunit, putative
3	CADAFLAG00010597	AFLA_005320	0	0	0	0	0	0	0	0									polyketide synthase, putative
3	CADAFLAG00010598	AFLA_005330	0	0	0	0	0	0	0	0									conserved hypothetical protein
3	CADAFLAG00010599	AFLA_005340	0	0	0	0	0	0	0	0									conserved hypothetical protein
3	CADAFLAG00010600	AFLA_005350	0	0	0	0	0	0	0	0									hypothetical protein
3	CADAFLAG00010601	AFLA_005360	613.078	925.545	4535.53	3406.26	2817.06	1609.17	1286.59	1506.33	-0.59423	0.41308	0.80787	-0.22748	1	0.0044175	0.18924	1	conserved hypothetical protein
4	CADAFLAG00010601	AFLA_005360	330.45	302.467	1377.88	1788.6	855.831	866.332	675.61	490.42	0.12766	-0.37638	-0.017594	0.46217	1	0.067127	1	1	conserved hypothetical protein
4	CADAFLAG00010602	AFLA_005370	0	0	0	0	0	0	0	0									conserved hypothetical protein
4	CADAFLAG00010603	AFLA_005380	0	1.50259	2.88009	0	1.7888	0	0	2.40412					1	1	1	1	hypothetical protein
4	CADAFLAG00010604	AFLA_005390	11.8889	10.2154	47.9729	38.4305	29.7953	31.2323	14.5158	16.5239	0.21888	0.31997	-0.067957	-0.18693	1	1	1	1	conserved hypothetical protein
4	CADAFLAG00010605	AFLA_005400	30.854	32.042	208.275	161.54	129.367	80.973	60.9996	51.9955	-0.054509	0.36659	0.67596	0.23041	1	0.69833	1	1	ankyrin repeat-containing protein, putative
4	CADAFLAG00010606	AFLA_005410	0	0	1.57437	0	0.978005	0	0	0						1	1		5-AMP-activated protein kinase, putative
4	CADAFLAG00010607	AFLA_005420	269.614	242.983	786.596	658.104	488.564	709.58	248.57	396.153	0.15004	0.25731	-0.53842	-0.67241	1	0.49512	0.9802	1	hypothetical protein
4	CADAFLAG00010608	AFLA_005430	0	4.90002	6.07181	4.02059	3.77202	0	1.51773	7.86191		0.59472		-2.373	1	1	1	1	hypothetical protein
4	CADAFLAG00010609	AFLA_005440	1.17254	6.01037	5.59541	8.53483	3.47521	3.05722	3.22654	9.61649	-2.3578	-0.60912	0.18488	-1.5755	1	1	1	1	nonribosomal peptide synthase, putative
4	CADAFLAG00010610	AFLA_005450	1.17254	6.01037	5.59541	8.53483	3.47521	3.05722	3.22654	9.61649	-2.3578	-0.60912	0.18488	-1.5755	1	1	1	1	conserved hypothetical protein
4	CADAFLAG00010611	AFLA_005460	1.21342	3.35417	5.20494	8.53483	3.23281	3.22225	3.22654	5.41422	-1.4669	-0.71348	0.0047215	-0.74677	1	1	1	1	cytochrome P450, putative
4	CADAFLAG00010612	AFLA_005470	1.21342	1.26322	4.74106	3.0095	2.9444	3.22225	1.1392	2.03578	-0.058025	0.65569	-0.13009	-0.83756	1	1	1	1	hypothetical protein
4	CADAFLAG00010613	AFLA_005480	73.0719	96.1202	906.962	551.689	563.333	191.897	208.33	155.472	-0.39552	0.71719	1.5537	0.42222	1	0.00069427	0.005818	1	nADP transhydrogenase, putative
4	CADAFLAG00010614	AFLA_005490	17.1858	21.8901	219.992	100.515	136.648	45.0723	37.9434	35.4083	-0.34906	1.13	1.6002	0.099761	1	0.044813	0.22924	1	nADP transhydrogenase, putative
4	CADAFLAG00010615	AFLA_005500	0.606711	2.48318	14.773	5.77217	9.17603	1.61112	2.18287	4.02799	-2.0331	1.3558	2.5098	-0.88383	1	0.81864	1	1	hypothetical protein
4	CADAFLAG00010616	AFLA_005510	30.2881	32.5901	188.974	134.383	117.378	79.5269	50.7576	53.1837	-0.10568	0.49183	0.56165	-0.06736	1	0.44952	1	1	amino acid permease, putative
4	CADAFLAG00010617	AFLA_005520	15.5292	20.3644	190.967	128.564	118.613	40.8991	48.5819	32.8537	-0.39107	0.57084	1.5361	0.56437	1	0.32072	0.55637	1	C6 transcription factor, putative
5	CADAFLAG00010682	AFLA_006170	19.0877	76.2749	377.587	495.424	234.533	50.2358	187.078	123.141	-1.9986	-0.39185	2.223	0.60333	1	0.37495	0.011724	1	polyketide synthetase PksP
5	CADAFLAG00010683	AFLA_006180	2.38596	22.1929	30.6869	46.4479	19.0605	6.27947	17.5549	35.7133	-3.2175	-0.59799	1.6019	-1.0246	1	0.92921	1	1	conidial pigment biosynthesis oxidase Arb2/brown2
5	CADAFLAG00010684	AFLA_006190	1.17254	3.2013	1.96484	4.51425	1.2204	3.05722	1.7088	5.13302	-1.449	-1.2001	-1.3249	-1.5868	1	1	1	1	multicopper oxidase, putative
5	CADAFLAG00010685	AFLA_006200	0	0.435492	1.08004	2.76267	0.670802	0	1.04367	0.693116		-1.355		0.59049	1	1	1	1	hypothetical protein
5	CADAFLAG00010686	AFLA_006210	46.0626	52.6718	204.228	221.578	126.853	121.416	83.6737	85.6254	-0.19343	-0.11763	0.063201	-0.033265	1	1	1	1	SH3 domain protein (Cyk3), putative
5	CADAFLAG00010687	AFLA_006220	61.4283	59.6397	244.58	388.573	151.915	161.655	146.771	96.7153	0.042631	-0.66788	-0.089652	0.60176	1	0.041696	1	1	exopolyphosphatase, putative
5	CADAFLAG00010688	AFLA_006230	9.0189	29.1868	132.382	156.978	82.2247	23.8368	59.298	47.211	-1.6943	-0.24586	1.7864	0.32886	1	0.95271	0.78452	1	1-aminocyclopropane-1-carboxylate deaminase, putative
6	CADAFLAG00012975	AFLA_008650	0	0.63161	1.83051	1.50475	1.1368	0	0.569601	1.01789		0.28272		-0.83756	1	1	1	1	short-chain dehydrogenases/reductase, putative
6	CADAFLAG00012976	AFLA_008660	0	0.827728	5.57747	2.51584	3.46482	0	0.948133	1.34266		1.1486		-0.50194	1	1	1	1	hypothetical protein
6	CADAFLAG00012977	AFLA_008670	0	0.435492	3.04487	3.0095	1.89121	0	1.1392	0.693116		0.016859		0.71686	1	1	1	1	conserved hypothetical protein
6	CADAFLAG00012978	AFLA_008680	0	0	0	0	0	0	0	0									conserved hypothetical protein
6	CADAFLAG00012979	AFLA_008690	2.34508	41.4612	33.2859	262.923	20.6737	6.11445	99.3431	66.1906	-4.1441	-2.9817	1.7575	0.58579	1	4.7555e-05	1	1	conserved hypothetical protein
6	CADAFLAG00012980	AFLA_008700	0	0	0	0	0	0	0	0									monooxygenase, putative
6	CADAFLAG00012981	AFLA_008710	0	0	0	0	0	0	0	0									monooxygenase, putative
6	CADAFLAG00012982	AFLA_008720	16.6609	20.3442	98.1005	127.576	60.9302	43.7913	48.1998	32.9606	-0.28816	-0.37903	0.47651	0.54828	1	0.82195	1	1	conserved hypothetical protein
6	CADAFLAG00012983	AFLA_008730	0.606711	0.827728	0.884803	0	0.549602	1.61112	0	1.34266	-0.44815		-1.5516		1	1	1	1	hypothetical protein
6	CADAFLAG00012984	AFLA_008740	60.6989	60.404	299.32	287.859	185.913	159.549	108.725	98.1213	0.0070275	0.056328	0.22063	0.14805	1	1	1	1	oxidoreductase, short chain dehydrogenase/reductase family
6	CADAFLAG00012985	AFLA_008750	2.34508	0.827728	1.83051	1.50475	1.1368	6.11445	0.569601	1.34266	1.5024	0.28272	-2.4272	-1.2371	1	1	1	1	hypothetical protein
6	CADAFLAG00012986	AFLA_008760	1.17254	0.392236	1.11049	1.25792	0.6896	3.05722	0.474066	0.649546	1.5798	-0.17984	-2.1484	-0.45434	1	1	1	1	multidrug resistance protein, putative
6	CADAFLAG00012987	AFLA_008770	0.606711	0.827728	1.86096	5.2785	1.1556	1.61112	1.9918	1.34266	-0.44815	-1.5041	-0.47943	0.56898	1	0.96604	1	1	nonribosomal peptide synthase, putative
7	CADAFLAG00013108	AFLA_009980	0	4.33476	5.21746	5.03167	3.24122	0	1.89627	7.03809		0.05231		-1.892	1	1	1	1	ABC multidrug transporter, putative
7	CADAFLAG00013109	AFLA_009990	2.34508	5.00962	15.2548	14.3308	9.47483	6.11445	5.4058	8.09955	-1.0951	0.09015	0.63188	-0.58333	1	1	1	1	1-aminocyclopropane-1-carboxylate oxidase, putative
7	CADAFLAG00013110	AFLA_010000	6.51029	9.62701	34.6721	38.4305	21.5369	17.0623	14.5158	15.5495	-0.56437	-0.14848	0.336	-0.099247	1	1	1	1	polyketide synthase, putative
7	CADAFLAG00013111	AFLA_010010	12.5365	18.8185	64.6999	56.5588	40.1877	33.0085	21.3402	30.406	-0.58602	0.19401	0.28392	-0.51078	1	1	1	1	nonribosomal peptide synthase, putative
7	CADAFLAG00013112	AFLA_010020	7.72371	13.6993	42.2861	49.7518	26.2637	20.2845	18.7824	22.0688	-0.82674	-0.23456	0.37269	-0.23263	1	1	1	1	nonribosomal peptide synthase, putative
7	CADAFLAG00013113	AFLA_010030	1.17254	7.14383	22.6682	21.6077	14.0784	3.05722	8.15827	11.5216	-2.6071	0.069127	2.2032	-0.498	1	1	1	1	oxidoreductase, 2OG-Fe(II) oxygenase family, putative
7	CADAFLAG00013114	AFLA_010040	4.73104	5.59798	32.1395	25.8751	19.9633	12.3939	9.77154	9.07387	-0.24275	0.31278	0.68772	0.10687	1	1	1	1	conserved hypothetical protein
7	CADAFLAG00013115	AFLA_010050	2.99267	2.52644	33.4452	11.0507	20.7741	7.89059	4.17467	4.07156	0.24433	1.5977	1.3966	0.036082	1	0.32418	1	1	alcohol dehydrogenase, putative
8	CADAFLAG00013165	AFLA_010550	5.41951	3.59354	12.167	16.8228	7.55641	14.3351	6.35754	5.78256	0.59276	-0.46745	-0.92378	0.13676	1	1	1	1	O-methyltransferase family protein
8	CADAFLAG00013166	AFLA_010560	3.5585	0.196118	3.56966	0	2.21721	9.33669	0	0.324773	4.1815		-2.0742		1	1	1	1	hypothetical protein
8	CADAFLAG00013167	AFLA_010570	8.85537	8.55991	26.5925	47.5065	16.5173	23.1767	17.9262	13.8385	0.048958	-0.83711	-0.4887	0.37338	1	0.84993	1	1	hypothetical protein
8	CADAFLAG00013168	AFLA_010580	106.673	102.33	473.927	523.369	294.386	279.771	197.599	165.67	0.059975	-0.14317	0.073466	0.25426	1	1	1	1	nonribosomal peptide synthase, putative
8	CADAFLAG00013169	AFLA_010590	6.55117	17.6679	10.4529	8.288	6.49283	17.2273	3.131	28.8652	-1.4313	0.3348	-1.4078	-3.2046	1	1	1	0.23851	siderophore biosynthesis lipase/esterase, putative
8	CADAFLAG00013170	AFLA_010600	6.59206	18.412	3.96013	1.50475	2.45961	17.3923	0.569601	30.3782	-1.4818	1.396	-2.822	-5.7369	1	1	0.98304	1	siderophore biosynthesis acetylase AceI, putative
8	CADAFLAG00013171	AFLA_010610	5.37863	15.9259	2.5935	6.53642	1.61121	14.1701	2.46587	26.0928	-1.5661	-1.3336	-3.1366	-3.4035	1	0.95551	1	1	enoyl-CoA hydratase/isomerase family protein
8	CADAFLAG00013172	AFLA_010620	23.8187	72.7741	39.3881	56.2644	24.4645	62.6297	21.2519	119.869	-1.6113	-0.51446	-1.3562	-2.4958	1	0.84688	1	1	nonribosomal siderophore peptide synthase Sid2
8	CADAFLAG00013173	AFLA_010630	21.4737	72.5663	145.917	180.067	90.6339	56.5152	68.0295	118.515	-1.7567	-0.30338	0.68141	-0.80083	1	0.86417	1	1	ABC multidrug transporter SidT
8	CADAFLAG00013174	AFLA_010640	23.3755	78.2596	40.8407	58.5572	25.3673	61.6786	22.1009	128.448	-1.7433	-0.51984	-1.2818	-2.539	1	0.90466	0.85286	1	MFS siderophore transporter, putative
9	CADAFLAG00003661	AFLA_017760	733.525	138.132	541.061	675.937	336.062	1933.65	255.306	223.108	2.4088	-0.3211	-2.5245	0.19448	0.021636	0.34726	0.044987	1	phenol 2-monooxygenase, putative
9	CADAFLAG00003662	AFLA_017770	16.0541	23.7878	58.1016	67.5619	36.0853	42.1801	25.5221	38.7194	-0.56728	-0.21763	-0.22515	-0.60131	1	1	1	1	D-isomer specific 2-hydroxyacid dehydrogenase family protein
9	CADAFLAG00003663	AFLA_017780	126.538	146.591	659.234	644.314	409.467	333.142	243.348	237.481	-0.21223	0.033028	0.29761	0.035207	1	1	1	1	oligopeptide transporter, OPT family, putative
9	CADAFLAG00003664	AFLA_017790	13.6273	12.5024	27.9896	39.171	17.3844	35.7356	14.8024	20.2271	0.12429	-0.4849	-1.0396	-0.45045	1	0.98428	1	1	hypothetical protein
9	CADAFLAG00003665	AFLA_017800	68.9132	66.204	146.009	191.436	90.6903	181.814	72.2889	108.035	0.057863	-0.39081	-1.0034	-0.57965	1	0.5756	0.84039	1	SH3 domain protein
9	CADAFLAG00003666	AFLA_017810	36.3961	29.4291	92.3349	103.23	57.3506	95.8032	38.9942	47.8368	0.30654	-0.16091	-0.74027	-0.29486	1	1	1	1	cell division protein kinase (Ctk1), putative
9	CADAFLAG00003667	AFLA_017820	173.814	227.807	734.364	1045.96	456.135	457.78	395.051	370.179	-0.39027	-0.51026	-0.0051952	0.093816	1	0.017555	1	1	conserved hypothetical protein
9	CADAFLAG00003668	AFLA_017830	241.718	163.348	714.049	611.338	443.515	637.197	230.93	265.174	0.56538	0.22405	-0.52276	-0.19948	1	0.59849	0.91973	1	small nuclear ribonucleoprotein complex protein Nhp2, putative
9	CADAFLAG00003669	AFLA_017840	53.6228	47.3565	98.4013	454.653	61.1206	141.041	171.72	76.9635	0.17929	-2.208	-1.2064	1.1578	1	1.0376e-15	0.81122	0.73971	NRPS-like enzyme, putative
9	CADAFLAG00003670	AFLA_017850	25.3527	866.111	1491.77	7217.46	926.564	66.3079	2726.12	1386.41	-5.0943	-2.2745	3.8046	0.97549	1	8.6573e-65	1.4894e-17	1	conserved hypothetical protein
9	CADAFLAG00003671	AFLA_017860	66.9231	1199.8	1053.99	7033.42	654.654	175.456	2656.96	1922.53	-4.1641	-2.7384	1.8996	0.46677	1	5.5602e-22	5.823e-05	1	hypothetical protein
9	CADAFLAG00003672	AFLA_017870	54.9998	57.7247	241.955	203.45	150.281	144.923	76.8493	93.7685	-0.069763	0.25006	0.052376	-0.28707	1	0.84582	1	1	GTP-binding protein
9	CADAFLAG00003673	AFLA_017880	23.0076	171.697	403.544	1018.41	250.653	60.1934	384.735	275.492	-2.8997	-1.3355	2.058	0.48186	1	1.8871e-05	0.0023532	1	conserved hypothetical protein
9	CADAFLAG00003674	AFLA_017890	30.9357	52.9053	164.876	218.569	102.41	81.3031	82.5345	85.4789	-0.77414	-0.4067	0.33297	-0.050572	1	0.49297	1	1	SET domain protein
9	CADAFLAG00003675	AFLA_017900	162.041	167.948	1047.91	676.479	650.883	426.179	255.49	272.988	-0.051657	0.6314	0.61094	-0.095575	1	0.0016203	0.82682	1	C6 transcription factor FacB/Cat8
9	CADAFLAG00003676	AFLA_017910	1526.3	2024.54	11322.1	10511.2	7032.5	4018.48	3969.67	3291.96	-0.40756	0.10721	0.80739	0.27007	1	0.85805	0.29432	1	transketolase TktA
9	CADAFLAG00003677	AFLA_017920	479.626	462.225	1982.62	1828.63	1231.43	1263.2	690.681	753.887	0.053314	0.11665	-0.036754	-0.12633	1	0.87429	1	1	spermidine synthase
9	CADAFLAG00003678	AFLA_017930	0	1.0671	1.80006	1.25792	1.118	0	0.474066	1.71101		0.51701		-1.8517	1	1	1	1	conserved hypothetical protein
9	CADAFLAG00003679	AFLA_017940	8.85537	0.784473	7.01752	4.02059	4.35922	23.1767	1.51773	1.29909	3.4968	0.80356	-2.4105	0.22441	1	1	1	1	hypothetical protein
10	CADAFLAG00001667	AFLA_022810	0.606711	0.827728	2.92306	1.25792	1.81601	1.61112	0.474066	1.34266	-0.44815	1.2164	0.17271	-1.5019	1	1	1	1	sugar transporter, putative
10	CADAFLAG00001668	AFLA_022820	56.2476	33.81	61.0568	209.469	37.9245	147.446	79.1277	55.1759	0.73434	-1.7785	-1.959	0.52014	1	8.4309e-06	1	1	conserved hypothetical protein
10	CADAFLAG00001669	AFLA_022830	64.7006	44.683	52.5993	179.844	32.6709	169.837	67.9303	73.1255	0.53405	-1.7736	-2.3781	-0.10632	1	3.7083e-05	0.56039	1	conserved hypothetical protein
10	CADAFLAG00001670	AFLA_022840	0	0	0	0	0	0	0	0									allantoate permease, putative
10	CADAFLAG00001671	AFLA_022850	0	0	0.16478	0	0.102401	0	0	0						1	1		conserved hypothetical protein
10	CADAFLAG00001672	AFLA_022860	2.38596	2.1342	19.2884	3.77375	11.9804	6.27947	1.4222	3.42201	0.16087	2.3537	0.93197	-1.2667	1	0.42342	1	1	hypothetical protein
10	CADAFLAG00001673	AFLA_022870	5.33775	6.16324	50.6094	25.1346	31.4337	14.005	9.48494	9.89769	-0.20746	1.0097	1.1664	-0.061454	1	0.53771	1	1	conserved hypothetical protein
10	CADAFLAG00001674	AFLA_022880	785.745	623.436	4265.31	1146.27	2649.27	2067.35	432.891	1004.19	0.33382	1.8957	0.35781	-1.2139	1	3.4988e-50	1	1	oligopeptide transporter, putative
10	CADAFLAG00001675	AFLA_022990	14.3158	18.6657	119.929	37.6663	74.4906	37.6768	14.2328	30.1248	-0.38278	1.6708	0.98338	-1.0817	1	0.0024503	1	1	conserved hypothetical protein
10	CADAFLAG00001676	AFLA_023000	10.1914	3.70315	83.1698	33.9163	51.6582	26.894	12.807	6.0202	1.4605	1.2941	0.94171	1.0891	1	0.10012	1	1	Ankyrin domain protein
10	CADAFLAG00001677	AFLA_023010	11.8889	19.4934	1225.15	445.06	760.959	31.2323	168.122	31.4674	-0.71337	1.4609	4.6067	2.4176	1	5.7852e-17	4.9512e-18	0.00026057	GA4 desaturase family protein
10	CADAFLAG00001678	AFLA_023020	0	0	0.16478	0	0.102401	0	0	0						1	1		NRPS-like enzyme, putative
10	CADAFLAG00001679	AFLA_023030	0.606711	0	0.360012	0	0.223601	1.61112	0	0			-2.8491		1	1	1		cytochrome P450 oxidoreductase GliC-like, putative
10	CADAFLAG00001680	AFLA_023040	16.0133	13.9849	71.0996	48.7644	44.1601	42.0151	18.4003	22.7381	0.1954	0.54401	0.071836	-0.30539	1	1	1	1	C6 transcription factor, putative
10	CADAFLAG00001681	AFLA_023050	2.99267	5.00962	21.1314	16.576	13.1256	7.89059	6.26201	8.09955	-0.74327	0.35029	0.73418	-0.37122	1	1	1	1	MFS transporter, putative
11	CADAFLAG00002239	AFLA_028640	18.6854	8.43014	11.9538	51.4796	7.42482	49.4497	19.4512	13.7078	1.1483	-2.1065	-2.7355	0.50486	1	0.027448	0.99878	1	cytochrome P450 sterol C-22 desaturase, putative
11	CADAFLAG00002240	AFLA_028650	54.9589	86.3432	248.202	440.593	154.159	144.758	166.406	139.898	-0.65173	-0.82793	0.09078	0.25033	1	0.0032789	1	1	Rhodanese domain protein
11	CADAFLAG00002241	AFLA_028660	275.115	207.197	1063.2	940.086	660.395	724.245	354.995	336.442	0.40903	0.17754	-0.13315	0.077441	1	0.94627	1	1	mitochondrial translation initiation factor IF-2, putative
11	CADAFLAG00002242	AFLA_028670	66.1185	54.5234	263.514	254.707	163.674	173.884	96.2013	88.6355	0.27818	0.049043	-0.087299	0.11817	1	1	1	1	conserved hypothetical protein
11	CADAFLAG00002243	AFLA_028680	22.6871	23.1361	99.3219	114.257	61.691	59.7375	43.1725	37.8084	-0.028273	-0.20209	0.046424	0.19141	1	1	1	1	TBC domain protein, putative
11	CADAFLAG00002244	AFLA_028690	132.36	135.99	628.786	567.652	390.554	348.263	214.419	220.822	-0.039035	0.14756	0.16535	-0.042456	1	0.89466	1	1	Yip1 domain family
11	CADAFLAG00002245	AFLA_028700	2259.95	2049.85	7081.79	7523.16	4398.57	5957.65	2841.71	3348.25	0.14077	-0.087226	-0.43771	-0.23665	1	0.9397	1	1	ubiquitin UbiA, putative
11	CADAFLAG00002246	AFLA_028710	29.8041	18.4494	60.0181	86.1364	37.2765	78.4109	32.5448	29.9069	0.69194	-0.52123	-1.0728	0.12195	1	0.74087	1	1	short chain type dehydrogenase, putative
11	CADAFLAG00002247	AFLA_028720	0	0.870983	15.7796	25.3814	9.80083	0	9.58047	1.38623		-0.68571		2.7889	1	0.87003	1	0.89115	NRPS-like enzyme, putative
12	CADAFLAG00005188	AFLA_038600	3.5585	2.28707	15.0058	8.288	9.32246	9.33669	3.131	3.70321	0.63777	0.85642	-0.0022006	-0.24215	1	1	1	1	nonribosomal peptide synthase, putative
12	CADAFLAG00005189	AFLA_038610	40.3978	44.4983	133.256	208.975	82.7703	106.091	78.9366	71.9216	-0.13947	-0.64913	-0.35812	0.13427	1	0.19741	1	1	Ankyrin repeat protein
12	CADAFLAG00005190	AFLA_038620	67.0457	51.8008	190.896	243.879	118.572	175.951	92.1258	84.2392	0.37217	-0.35338	-0.56942	0.12911	1	0.64696	1	1	branched-chain amino acid aminotransferase, putative
12	CADAFLAG00005191	AFLA_038630	12.3321	7.84179	40.4198	23.8767	25.1061	32.1834	9.01087	12.7335	0.65317	0.75946	-0.35828	-0.49889	1	0.83977	1	1	cytochrome P450, putative
12	CADAFLAG00005192	AFLA_038640	37.6031	5.40186	25.1095	34.4099	15.5956	98.1612	12.9981	8.74909	2.7993	-0.45459	-2.654	0.57109	1	0.9943	1	1	fatty acid synthase alpha subunit, putative
12	CADAFLAG00005193	AFLA_038650	86.6649	68.9727	150.682	86.6538	93.5907	228.332	32.7322	112.732	0.32942	0.79817	-1.2867	-1.7841	1	0.16184	0.34024	1	aspartic-type endopeptidase, putative
12	CADAFLAG00005194	AFLA_038660	0	0.435492	1.11049	0	0.6896	0	0	0.693116					1	1	1	1	hypothetical protein
12	CADAFLAG00005195	AFLA_038670	7.80548	8.9954	52.6727	38.1837	32.7169	20.6146	14.4203	14.5317	-0.2047	0.4641	0.66637	-0.0111	1	0.94853	1	1	MFS transporter, putative
13	CADAFLAG00005481	AFLA_041540	353.968	441.814	1505.3	1715.43	934.98	931.098	647.88	716.915	-0.31982	-0.18852	0.0060022	-0.14607	1	0.54368	1	1	C6 transcription factor Ctf1A, putative
13	CADAFLAG00005482	AFLA_041550	215.432	227.671	769.916	941.225	478.208	567.958	355.487	369.533	-0.079724	-0.28984	-0.24815	-0.055907	1	0.32611	1	1	cystathionine beta-lyase MetG
13	CADAFLAG00005483	AFLA_041560	77.2028	63.764	142.762	301.155	88.6715	203.544	113.756	104.05	0.27591	-1.0769	-1.1988	0.12866	1	0.001411	0.44191	1	conserved hypothetical protein
13	CADAFLAG00005484	AFLA_041570	113.681	105.286	353.753	527.916	219.718	299.677	199.436	171.829	0.11067	-0.57757	-0.44776	0.21495	1	0.095696	1	1	conserved hypothetical protein
13	CADAFLAG00005485	AFLA_041580	807.798	944.436	3158.45	4559.51	1961.84	2127.04	1721.75	1537.45	-0.22546	-0.52966	-0.11664	0.16334	1	0.14041	1	1	estradiol 17 beta-dehydrogenase, putative
13	CADAFLAG00005486	AFLA_041590	2607.13	3367.36	11028.6	15537.5	6850.08	6862.22	5868.35	5487.31	-0.36915	-0.49451	-0.0025531	0.096856	1	0.00010584	1	1	peroxisomal multifunctional beta-oxidation protein (MFP), putative
13	CADAFLAG00005487	AFLA_041600	56.0905	65.5866	310.353	331.074	192.767	147.65	125.042	106.395	-0.22564	-0.093243	0.38468	0.23298	1	1	1	1	RING finger protein (Zin), putative
13	CADAFLAG00005488	AFLA_041610	0	1.02385	2.12962	3.77375	1.32281	0	1.4222	1.66744		-0.82541		-0.22951	1	1	1	1	NRPS-like enzyme, putative
14	CADAFLAG00005876	AFLA_045490	0	0.435492	0.750476	1.25792	0.465999	0	0.474066	0.693116		-0.74516		-0.54801	1	1	1	1	dimethylallyl tryptophan synthase, putative
14	CADAFLAG00005877	AFLA_045500	0	0	0	0	0	0	0	0									cytochrome P450, putative
14	CADAFLAG00005878	AFLA_045510	0	0	0	0	0	0	0	0									integral membrane protein
14	CADAFLAG00005879	AFLA_045520	0	0	0	0	0	0	0	0									integral membrane protein
14	CADAFLAG00005880	AFLA_045530	0	0	0	0	0	0	0	0									conserved hypothetical protein
14	CADAFLAG00005881	AFLA_045540	0	0	0	0	0	0	0	0									cytochrome P450, putative
14	CADAFLAG00005882	AFLA_045550	4.73104	3.39742	12.1061	5.52533	7.51882	12.3939	2.08734	5.45779	0.47772	1.1316	-0.72105	-1.3867	1	0.98459	1	1	hypothetical protein
14	CADAFLAG00005883	AFLA_045560	9.46209	23.2831	132.692	53.478	82.4146	24.7878	20.2118	37.5748	-1.2991	1.3111	1.7333	-0.89456	1	0.01107	0.40056	1	carboxylic acid transport protein
15	CADAFLAG00011366	AFLA_053760	40.7658	67.395	372.685	226.61	231.484	107.576	85.5699	109.362	-0.72528	0.71775	1.1056	-0.35393	1	0.031954	0.80538	1	hypothetical protein
15	CADAFLAG00011367	AFLA_053770	0.606711	0.827728	7.69457	5.2785	4.77921	1.61112	1.9918	1.34266	-0.44815	0.54371	1.5687	0.56898	1	1	1	1	PKS-like enzyme, putative
15	CADAFLAG00011368	AFLA_053780	0.606711	0.63161	3.8258	4.02059	2.376	1.61112	1.51773	1.01789	-0.058025	-0.071644	0.56047	0.57634	1	1	1	1	PKS-like enzyme, putative
15	CADAFLAG00011369	AFLA_053790	0.606711	0.392236	3.56966	4.26742	2.21721	1.61112	1.61327	0.649546	0.62929	-0.25757	0.46068	1.3125	1	1	1	1	hypothetical protein
15	CADAFLAG00011370	AFLA_053800	2.38596	1.17671	20.6854	8.53483	12.8476	6.27947	3.22654	1.94864	1.0198	1.2772	1.0328	0.72752	1	0.70523	1	1	hypothetical protein
15	CADAFLAG00011371	AFLA_053810	554.552	394.209	2863.07	1261.15	1778.29	1459.23	476.369	638.81	0.49236	1.1828	0.28528	-0.42331	1	3.6706e-18	1	1	alpha-ketoglutarate-dependent taurine dioxygenase
15	CADAFLAG00011372	AFLA_053820	640.35	362.355	2297.26	925.095	1426.85	1688.26	349.423	588.276	0.82146	1.3122	-0.2427	-0.75152	1	8.1724e-20	1	1	FAD dependent oxidoreductase, putative
15	CADAFLAG00011373	AFLA_053830	71.2583	47.8957	387.872	93.7076	240.915	187.928	35.3856	77.3794	0.57316	2.0493	0.35834	-1.1288	1	7.3525e-12	1	1	MFS transporter Liz1/Seo1, putative
15	CADAFLAG00011374	AFLA_053840	19.6944	25.3077	149.426	91.9323	92.8135	51.8469	34.724	40.7591	-0.36179	0.70079	0.84008	-0.23119	1	0.25898	1	1	conserved hypothetical protein
15	CADAFLAG00011375	AFLA_053850	0	0.196118	1.24481	0	0.773203	0	0	0.324773					1	1	1	1	hypothetical protein
15	CADAFLAG00011376	AFLA_053860	0	0.392236	3.56966	2.76267	2.21721	0	1.04367	0.649546		0.36973		0.68416	1	1	1	1	hypothetical protein
15	CADAFLAG00011377	AFLA_053870	14.3567	13.2869	47.937	58.5097	29.7745	37.8418	22.1081	21.5262	0.11171	-0.28753	-0.34591	0.038483	1	1	1	1	polyketide synthase, putative
15	CADAFLAG00011378	AFLA_053880	1.21342	1.85157	2.19052	6.019	1.3604	3.22225	2.27841	3.0101	-0.60967	-1.4582	-1.244	-0.40179	1	1	1	1	hypothetical protein
15	CADAFLAG00011379	AFLA_053890	29.2383	19.5597	57.1021	123.333	35.4669	76.9648	46.5829	31.6615	0.57997	-1.1109	-1.1177	0.55707	1	0.053774	1	1	acetylcholinesterase, putative
15	CADAFLAG00011380	AFLA_053900	1.21342	1.85157	16.9331	20.8434	10.5176	3.22225	7.87528	3.0101	-0.60967	-0.29975	1.7067	1.3875	1	1	1	1	conserved hypothetical protein
15	CADAFLAG00011381	AFLA_053910	31.5833	31.3642	135.946	162.01	84.4399	83.0792	61.1943	50.6766	0.010044	-0.25305	0.023437	0.27208	1	0.92425	1	1	pantothenate transporter, putative
16	CADAFLAG00011394	AFLA_054040	41.5704	37.2507	109.678	131.844	68.1254	109.148	49.8131	60.6772	0.15829	-0.26556	-0.68002	-0.28463	1	0.98162	1	1	conserved hypothetical protein
16	CADAFLAG00011395	AFLA_054050	741.365	269.729	1497.6	995.268	930.204	1953.57	375.879	433.653	1.4587	0.5895	-1.0705	-0.20627	0.8299	0.00099586	0.2009	1	ABC multidrug transporter, putative
16	CADAFLAG00011396	AFLA_054060	4.73104	0.63161	10.1537	3.0095	6.30682	12.3939	1.1392	1.01789	2.9051	1.7544	-0.97465	0.16244	1	0.84827	1	1	ATP/GTP-binding protein, putative
16	CADAFLAG00011397	AFLA_054070	1.17254	1.89483	4.38105	7.27692	2.7208	3.05722	2.75247	3.05367	-0.69243	-0.73205	-0.16819	-0.14982	1	1	1	1	conserved hypothetical protein
16	CADAFLAG00011398	AFLA_054080	0.606711	0.435492	5.50405	5.03167	3.41881	1.61112	1.89627	0.693116	0.47836	0.12946	1.0854	1.452	1	1	1	1	Na(+)/H(+) antiporter, putative
16	CADAFLAG00011399	AFLA_054090	0	0	1.18391	0	0.735606	0	0	0						1	1		polyketide synthase, putative
17	CADAFLAG00011405	AFLA_054150	0.606711	1.85157	0.689571	10.2864	0.428403	1.61112	3.89168	3.0101	-1.6097	-3.8989	-1.911	0.37058	1	0.79434	1	1	cycloheximide resistance protein, putative
17	CADAFLAG00011406	AFLA_054160	0	0	0.329559	0	0.204802	0	0	0						1	1		hypothetical protein
17	CADAFLAG00011407	AFLA_054170	1.17254	0.196118	0	0	0	3.05722	0	0.324773	2.5798				1		1	1	MYB3r3, putative
17	CADAFLAG00011408	AFLA_054180	1.17254	0.435492	0	0	0	3.05722	0	0.693116	1.4289				1		1	1	conserved hypothetical protein
17	CADAFLAG00011409	AFLA_054190	2.95179	0.435492	3.89922	4.51425	2.42201	7.72557	1.7088	0.693116	2.7609	-0.2113	-1.6734	1.3018	1	1	1	1	conserved hypothetical protein
17	CADAFLAG00011410	AFLA_054200	0	0	0.195232	0	0.121199	0	0	0						1	1		hypothetical protein
17	CADAFLAG00011411	AFLA_054210	17.7516	23.2831	111.994	72.5936	69.5586	46.5184	27.4184	37.5748	-0.39133	0.62551	0.58043	-0.45462	1	0.49113	1	1	ankyrin repeat-containing protein, putative
17	CADAFLAG00011412	AFLA_054220	0	0	0.16478	0	0.102401	0	0	0						1	1		conserved hypothetical protein
17	CADAFLAG00011413	AFLA_054230	0	0	0	0	0	0	0	0									conserved hypothetical protein
17	CADAFLAG00011414	AFLA_054240	4.77192	12.6322	56.9069	13.5665	35.3457	12.5589	5.1228	20.3578	-1.4045	2.0686	1.4928	-1.9906	1	0.03174	1	1	conserved hypothetical protein
17	CADAFLAG00011415	AFLA_054250	0.606711	0	1.63528	0	1.0156	1.61112	0	0			-0.66573		1	1	1		conserved hypothetical protein
17	CADAFLAG00011416	AFLA_054260	0.606711	1.65546	3.46579	5.52533	2.1524	1.61112	2.08734	2.68533	-1.4481	-0.67288	0.41788	-0.36343	1	1	1	1	MFS transporter, putative
17	CADAFLAG00011417	AFLA_054270	2.38596	3.07154	7.15185	5.52533	4.44282	6.27947	2.08734	5.00231	-0.36439	0.37225	-0.49917	-1.2609	1	1	1	1	NRPS-like enzyme, putative
17	CADAFLAG00011418	AFLA_054280	0	0	0.360012	0	0.223601	0	0	0						1	1		conserved hypothetical protein
17	CADAFLAG00011419	AFLA_054290	0	0.392236	3.28307	1.50475	2.03961	0	0.569601	0.649546		1.1255		-0.18948	1	1	1	1	aldehyde reductase I (ARI), putative
17	CADAFLAG00011420	AFLA_054300	0	0.588354	3.24011	2.51584	2.0124	0	0.948133	0.97432		0.365		-0.039306	1	1	1	1	pantothenate transporter, putative
17	CADAFLAG00011421	AFLA_054310	2.42684	4.05213	21.6257	18.0808	13.4329	6.44449	6.83161	6.62617	-0.7396	0.25829	1.0596	0.044049	1	1	1	1	conserved hypothetical protein
17	CADAFLAG00011422	AFLA_054320	99.849	70.3712	298.942	426.732	185.679	263.117	161.195	113.505	0.50476	-0.51347	-0.50289	0.50606	1	0.1452	1	1	NPP1 domain protein, putative
17	CADAFLAG00011423	AFLA_054330	17.956	11.2191	13.3204	74.8626	8.27322	47.3436	28.271	18.2982	0.67852	-2.4906	-2.5166	0.62762	1	0.00036358	0.5096	1	conserved hypothetical protein
17	CADAFLAG00011424	AFLA_054340	295.777	275.783	1366.62	1129.38	848.819	778.324	426.545	447.13	0.10098	0.27508	0.12509	-0.067999	1	0.31051	1	1	isoflavone reductase family protein
17	CADAFLAG00011425	AFLA_054350	115.331	181.592	719.865	819.326	447.128	302.987	309.484	293.984	-0.65493	-0.18671	0.56143	0.074131	1	0.76495	0.85607	1	actin-binding protein Fragmin, putative
17	CADAFLAG00011426	AFLA_054360	0.606711	2.56969	10.1412	9.05226	6.29841	1.61112	3.414	4.11513	-2.0825	0.16388	1.9669	-0.26947	1	1	1	1	conserved hypothetical protein
17	CADAFLAG00011427	AFLA_054370	0.606711	13.7195	9.95852	80.3642	6.18562	1.61112	30.3619	21.9619	-4.4991	-3.0125	1.9409	0.46726	1	1.2555e-05	1	1	short-chain dehydrogenase, putative
17	CADAFLAG00011428	AFLA_054380	0	2.91868	15.9569	33.9163	9.91164	0	12.807	4.7211		-1.0878		1.4397	1	0.52569	1	1	hypothetical protein
17	CADAFLAG00011429	AFLA_054390	17.1449	28.3389	139.387	165.314	86.5755	44.9073	62.4218	45.9753	-0.725	-0.24611	0.94701	0.44119	1	0.87904	0.86822	1	conserved hypothetical protein
18	CADAFLAG00006604	AFLA_059950	11.848	2.48318	19.8436	7.03008	12.3252	31.0673	2.65694	4.02799	2.2544	1.4971	-1.3338	-0.6003	1	0.63736	1	1	oxidoreductase, FAD-binding, putative
18	CADAFLAG00006605	AFLA_059960	2.95179	1.69871	10.1537	5.52533	6.30682	7.72557	2.08734	2.7289	0.79715	0.87788	-0.29273	-0.38665	1	1	1	1	conserved hypothetical protein
18	CADAFLAG00006606	AFLA_059970	200.053	221.035	976.62	613.948	606.583	525.99	231.864	359.414	-0.1439	0.66968	0.20567	-0.63237	1	0.0011185	1	1	short-chain dehydrogenase, putative
18	CADAFLAG00006607	AFLA_059980	0.606711	1.02385	5.10107	1.25792	3.168	1.61112	0.474066	1.66744	-0.75492	2.0198	0.97551	-1.8145	1	1	1	1	choline dehydrogenase, putative
18	CADAFLAG00006608	AFLA_059990	31.7404	9.36454	100.839	21.0903	62.6289	82.8751	7.97081	15.0307	1.761	2.2574	-0.40411	-0.91511	1	0.00032245	1	1	O-methyltransferase, putative
18	CADAFLAG00006609	AFLA_060000	1.17254	0.827728	6.01632	3.0095	3.7364	3.05722	1.1392	1.34266	0.50241	0.99936	0.28943	-0.23707	1	1	1	1	metallo-beta-lactamase domain protein
18	CADAFLAG00006610	AFLA_060010	1.17254	0.435492	0.854351	0	0.530804	3.05722	0	0.693116	1.4289		-2.526		1	1	1	1	PKS-like enzyme, putative
18	CADAFLAG00006611	AFLA_060020	3.5585	3.26766	13.7843	4.02059	8.56163	9.33669	1.51773	5.32708	0.12301	1.7776	-0.12503	-1.8114	1	0.76474	1	1	PKS-like enzyme, putative
18	CADAFLAG00006612	AFLA_060030	704.119	584.294	758.488	721.915	471.114	1850.14	272.666	957.634	0.26912	0.071297	-1.9735	-1.8123	1	1	0.057678	1	hypothetical protein
18	CADAFLAG00006613	AFLA_060040	100.94	64.8542	368.469	171.11	228.877	265.844	64.601	105.912	0.63822	1.1066	-0.21601	-0.71323	1	0.031253	1	1	integral membrane protein
18	CADAFLAG00006614	AFLA_060050	164.27	157.335	794.18	344.935	493.284	432.662	130.253	257.209	0.062228	1.2031	0.18918	-0.98162	1	9.6537e-09	1	1	GABA permease, putative
18	CADAFLAG00006615	AFLA_060060	4.16521	3.15805	19.4836	12.3086	12.1016	10.9478	4.64874	5.08945	0.39936	0.6626	0.14456	-0.13067	1	1	1	1	conserved hypothetical protein
18	CADAFLAG00006616	AFLA_060070	5.90358	10.7836	44.5196	45.2375	27.6513	15.4511	17.0736	17.6051	-0.86917	-0.023078	0.83963	-0.044226	1	1	1	1	conserved hypothetical protein
18	CADAFLAG00006617	AFLA_060080	218.882	93.0688	300.377	212.303	186.571	573.507	80.1605	150.362	1.2338	0.50065	-1.6201	-0.90748	1	0.3064	1	1	ABC transporter, putative
18	CADAFLAG00006618	AFLA_060090	21.3101	6.38245	16.1092	11.5681	10.0056	55.8551	4.36213	10.373	1.7394	0.47773	-2.4809	-1.2497	1	1	1	1	conserved hypothetical protein
19	CADAFLAG00006677	AFLA_060680	108.091	49.4793	25.1274	145.163	15.606	283.818	54.8403	81.2647	1.1274	-2.5303	-4.1848	-0.56739	1	2.0364e-07	0.030286	1	dimethylallyl tryptophan synthase, putative
19	CADAFLAG00006678	AFLA_060690	159.73	105.364	48.315	254.953	30.0085	419.365	96.2968	173.053	0.60025	-2.3997	-3.8048	-0.84565	1	2.7561e-11	0.09302	1	cytochrome P450, putative
19	CADAFLAG00006679	AFLA_060700	62.3964	48.4265	58.7624	116.796	36.4993	163.887	44.117	78.9319	0.36567	-0.99103	-2.1668	-0.83927	1	0.11764	0.28202	1	phenylalanine ammonia-lyase, putative
19	CADAFLAG00006680	AFLA_060710	397.556	313.008	1321.8	1301.56	820.986	1045.04	491.649	509.309	0.34496	0.022263	-0.34813	-0.050912	1	1	1	1	toxin biosynthesis protein, putative
19	CADAFLAG00006681	AFLA_060720	5.33775	5.11923	12.9246	2.76267	8.02884	14.005	1.04367	8.33718	0.060306	2.226	-0.80268	-2.9979	1	0.64473	1	1	D-lactate dehydrogenase, putative
19	CADAFLAG00006682	AFLA_060730	43.8402	66.7491	286.22	256.259	177.778	115.797	96.7637	108.966	-0.60649	0.15952	0.61848	-0.17133	1	1	1	1	endosomal sorting complex protein TSG101, putative
19	CADAFLAG00006683	AFLA_060740	6.02623	8.4503	51.1162	29.8957	31.7493	15.9462	11.2893	13.6009	-0.48775	0.77384	0.99351	-0.26875	1	0.68823	1	1	mating-type alpha-pheromone receptor PreB
19	CADAFLAG00006684	AFLA_060750	97.136	100.184	459.824	427.639	285.601	255.517	161.457	163.128	-0.044576	0.10469	0.16058	-0.014853	1	1	1	1	Golgi transport protein Sly1, putative
19	CADAFLAG00006685	AFLA_060760	91.028	106.687	415.297	422.337	257.955	239.241	159.468	172.859	-0.22901	-0.024251	0.10866	-0.11632	1	1	1	1	conserved hypothetical protein
20	CADAFLAG00006891	AFLA_062820	2.38596	2.76581	12.7598	6.53642	7.92644	6.27947	2.46587	4.4399	-0.21313	0.96503	0.33603	-0.84843	1	1	1	1	polyketide synthase, putative
20	CADAFLAG00006892	AFLA_062830	16.4564	9.82313	42.4634	21.3608	26.3745	42.9661	8.06274	15.8743	0.7444	0.99125	-0.70406	-0.97735	1	0.62092	1	1	monoxygenase, putative
20	CADAFLAG00006893	AFLA_062840	9.54385	5.94696	20.4418	18.5982	12.6972	25.1179	7.01907	9.67984	0.68242	0.13636	-0.9842	-0.4637	1	1	1	1	conserved hypothetical protein
20	CADAFLAG00006894	AFLA_062850	136.041	117.041	547.542	472.687	340.087	358.095	178.559	190.286	0.21702	0.21208	-0.074437	-0.091766	1	0.70674	1	1	fatty acid desaturase, putative
20	CADAFLAG00006895	AFLA_062860	23.6961	7.57932	86.0499	37.69	53.447	62.1346	14.2292	12.2147	1.6445	1.191	-0.21729	0.22024	1	0.13916	1	1	polyketide synthase, putative
20	CADAFLAG00006896	AFLA_062870	0.606711	0	0.915256	0	0.568401	1.61112	0	0			-1.5031		1	1	1		conserved hypothetical protein
20	CADAFLAG00006897	AFLA_062880	0	0.196118	1.04958	2.76267	0.652003	0	1.04367	0.324773		-1.3962		1.6842	1	1	1	1	short chain dehydrogenase/oxidoreductase, putative
20	CADAFLAG00006898	AFLA_062890	1.82013	1.26322	0.555244	0	0.3448	4.83337	0	2.03578	0.52694		-3.8092		1	1	1	1	hypothetical protein
20	CADAFLAG00006899	AFLA_062900	107.9	105.384	397.499	469.972	246.891	284.721	177.508	171.037	0.034036	-0.24162	-0.20568	0.053578	1	0.68249	1	1	glycerol-3-phosphate O-acyltransferase, putative
20	CADAFLAG00006900	AFLA_062910	13.0206	31.5171	228.605	296.417	141.993	34.1245	111.948	50.9578	-1.2753	-0.37477	2.0569	1.1355	1	0.47787	0.057389	0.64248	proline-specific permease, putative
20	CADAFLAG00006901	AFLA_062920	65.3482	36.3104	176.603	168.3	109.69	171.613	63.5646	58.8395	0.84776	0.069475	-0.64573	0.11144	1	1	1	1	conserved hypothetical protein
20	CADAFLAG00006902	AFLA_062930	206.624	67.4411	250.29	894.53	155.459	545.81	337.837	109.663	1.6153	-1.8375	-1.8119	1.6233	1	5.417e-19	0.83742	0.043779	glycosyl hydrolase, family 43, putative
20	CADAFLAG00006903	AFLA_062940	0	0	0	0	0	0	0	0									choline transport protein, putative
20	CADAFLAG00006904	AFLA_062950	0	0	0	0	0	0	0	0									hypothetical protein
20	CADAFLAG00006905	AFLA_062960	0	0	0	0	0	0	0	0									conserved hypothetical protein
20	CADAFLAG00006906	AFLA_062970	0	0	0	0	0	0	0	0									copper/topaquinone oxidase, putative
20	CADAFLAG00006907	AFLA_062980	0	0	0	0	0	0	0	0									conserved hypothetical protein
20	CADAFLAG00006908	AFLA_062990	0	0	0	0	0	0	0	0									1-aminocyclopropane-1-carboxylate oxidase, putative
21	CADAFLAG00007849	AFLA_064240	26.6479	15.7701	71.6315	69.8785	44.4926	69.8602	26.3675	25.5542	0.75683	0.035746	-0.65091	0.045201	1	1	1	1	nonribosomal peptide synthase, putative
21	CADAFLAG00007850	AFLA_064250	14.234	2.43993	13.1986	6.78325	8.19803	37.3468	2.5614	3.98442	2.5444	0.96034	-2.1876	-0.63744	1	1	1	1	phenol 2-monooxygenase, putative
21	CADAFLAG00007851	AFLA_064260	77.4694	5.05288	6.41931	4.02059	3.98721	202.107	1.51773	8.14312	3.9384	0.67501	-5.6636	-2.4237	1	1	1	1	oligopeptide transporter, putative
21	CADAFLAG00007852	AFLA_064270	56.3228	0.435492	0.750476	1.50475	0.465999	146.912	0.569601	0.693116	7.0149	-1.0036	-8.3004	-0.28314	1	1	1	1	gibberellin 2-oxidase, putative
21	CADAFLAG00007853	AFLA_064280	7.64195	0.435492	0	0	0	19.9545	0	0.693116	4.1332				1		0.94687	1	N-methyltransferase, putative
21	CADAFLAG00007854	AFLA_064290	19.3674	1.69871	0.329559	0	0.204802	50.5267	0	2.7289	3.5111		-7.9467		1	1	1	1	O-methyltransferase, putative
21	CADAFLAG00007855	AFLA_064300	16.4564	5.92386	14.1139	14.5776	8.76643	42.9661	5.50134	9.52935	1.474	-0.046638	-2.2931	-0.7926	1	1	1	1	fructosyl amino acid oxidase, putative
21	CADAFLAG00007856	AFLA_064310	9.38032	0.827728	4.48492	6.53642	2.78561	24.4578	2.46587	1.34266	3.5024	-0.54342	-3.1342	0.877	1	1	1	1	hypothetical protein
21	CADAFLAG00007857	AFLA_064320	39.9481	3.55029	19.2884	18.845	11.9804	104.276	7.11461	5.73899	3.4921	0.033549	-3.1216	0.30999	1	1	1	1	oligopeptide transporter, putative
21	CADAFLAG00007858	AFLA_064330	2.95179	0	0.750476	0	0.465999	7.72557	0	0			-4.0512		1	1	1		conserved hypothetical protein
21	CADAFLAG00007859	AFLA_064340	1.17254	0	2.52008	4.26742	1.5652	3.05722	1.61327	0		-0.75989	-0.96587		1	1	1	1	conserved hypothetical protein
21	CADAFLAG00007860	AFLA_064350	13.1841	9.99909	54.29	122.568	33.7221	34.7846	46.2999	16.306	0.39893	-1.1748	-0.044754	1.5056	1	0.044731	1	0.97265	MFS transporter, putative
21	CADAFLAG00007861	AFLA_064360	0	1.45934	12.1974	8.04117	7.57521	0	3.03547	2.36055		0.6011		0.36279	1	1	1	1	ABC multidrug transporter, putative
21	CADAFLAG00007862	AFLA_064370	12.4139	11.8708	50.0667	44.2027	31.0973	32.5134	16.6987	19.2092	0.064534	0.17972	-0.064245	-0.20206	1	1	1	1	C6 transcription factor, putative
21	CADAFLAG00007863	AFLA_064380	7.80548	2.76581	5.44315	12.3086	3.38122	20.6146	4.64874	4.4399	1.4968	-1.1772	-2.608	0.066312	1	0.88366	0.90358	1	conserved hypothetical protein
21	CADAFLAG00007864	AFLA_064390	1.82013	0.870983	0	0	0	4.83337	0	1.38623	1.0633				1		1	1	cytochrome P450 oxidoreductase GliF
21	CADAFLAG00007865	AFLA_064400	1.82013	0.435492	0.884803	1.25792	0.549602	4.83337	0.474066	0.693116	2.0633	-0.50761	-3.1366	-0.54801	1	1	1	1	benzoate 4-monooxygenase cytochrome P450, putative
21	CADAFLAG00007866	AFLA_064410	6.59206	7.77544	28.6737	36.6552	17.8109	17.3923	13.8543	12.5394	-0.2382	-0.35429	0.034309	0.14386	1	1	1	1	conserved hypothetical protein
21	CADAFLAG00007867	AFLA_064420	2.99267	0.827728	3.88671	1.25792	2.4136	7.89059	0.474066	1.34266	1.8542	1.6275	-1.7089	-1.5019	1	1	1	1	gliotoxin biosynthesis protein GliK
21	CADAFLAG00007868	AFLA_064430	27.9431	7.08041	23.1142	65.5398	14.3564	73.4125	24.765	11.5849	1.9806	-1.5036	-2.3543	1.0961	1	0.087449	0.57284	1	macrolide phosphotransferase k, putative
21	CADAFLAG00007869	AFLA_064440	2.99267	1.69871	2.68486	1.50475	1.66761	7.89059	0.569601	2.7289	0.81699	0.83532	-2.2424	-2.2603	1	1	1	1	transport protein, putative
22	CADAFLAG00007861	AFLA_064360	0	1.45934	12.1974	8.04117	7.57521	0	3.03547	2.36055		0.6011		0.36279	1	1	1	1	ABC multidrug transporter, putative
22	CADAFLAG00007862	AFLA_064370	12.4139	11.8708	50.0667	44.2027	31.0973	32.5134	16.6987	19.2092	0.064534	0.17972	-0.064245	-0.20206	1	1	1	1	C6 transcription factor, putative
22	CADAFLAG00007863	AFLA_064380	7.80548	2.76581	5.44315	12.3086	3.38122	20.6146	4.64874	4.4399	1.4968	-1.1772	-2.608	0.066312	1	0.88366	0.90358	1	conserved hypothetical protein
22	CADAFLAG00007864	AFLA_064390	1.82013	0.870983	0	0	0	4.83337	0	1.38623	1.0633				1		1	1	cytochrome P450 oxidoreductase GliF
22	CADAFLAG00007865	AFLA_064400	1.82013	0.435492	0.884803	1.25792	0.549602	4.83337	0.474066	0.693116	2.0633	-0.50761	-3.1366	-0.54801	1	1	1	1	benzoate 4-monooxygenase cytochrome P450, putative
22	CADAFLAG00007866	AFLA_064410	6.59206	7.77544	28.6737	36.6552	17.8109	17.3923	13.8543	12.5394	-0.2382	-0.35429	0.034309	0.14386	1	1	1	1	conserved hypothetical protein
22	CADAFLAG00007867	AFLA_064420	2.99267	0.827728	3.88671	1.25792	2.4136	7.89059	0.474066	1.34266	1.8542	1.6275	-1.7089	-1.5019	1	1	1	1	gliotoxin biosynthesis protein GliK
22	CADAFLAG00007868	AFLA_064430	27.9431	7.08041	23.1142	65.5398	14.3564	73.4125	24.765	11.5849	1.9806	-1.5036	-2.3543	1.0961	1	0.087449	0.57284	1	macrolide phosphotransferase k, putative
22	CADAFLAG00007869	AFLA_064440	2.99267	1.69871	2.68486	1.50475	1.66761	7.89059	0.569601	2.7289	0.81699	0.83532	-2.2424	-2.2603	1	1	1	1	transport protein, putative
22	CADAFLAG00007870	AFLA_064450	0.606711	0.435492	0.494339	0	0.307203	1.61112	0	0.693116	0.47836		-2.3908		1	1	1	1	aminotransferase GliI-like, putative
22	CADAFLAG00007871	AFLA_064460	0	0.588354	0.689571	1.50475	0.428403	0	0.569601	0.97432		-1.1258		-0.77444	1	1	1	1	conserved hypothetical protein
22	CADAFLAG00007872	AFLA_064470	3.5585	0.784473	2.52008	3.0095	1.5652	9.33669	1.1392	1.29909	2.1815	-0.25605	-2.5766	-0.18948	1	1	1	1	cytochrome P450, putative
22	CADAFLAG00007873	AFLA_064480	5.98534	1.85157	8.15846	14.5776	5.06762	15.7812	5.50134	3.0101	1.6927	-0.83738	-1.6388	0.86997	1	0.92096	1	1	conserved hypothetical protein
22	CADAFLAG00007874	AFLA_064490	5.37863	0.784473	4.93629	2.76267	3.0656	14.1701	1.04367	1.29909	2.7774	0.83737	-2.2086	-0.31584	1	1	1	1	conserved hypothetical protein
22	CADAFLAG00007875	AFLA_064500	183.556	89.7927	224.57	401.08	139.483	482.859	151.523	146.172	1.0315	-0.83673	-1.7915	0.051869	1	0.015415	0.044095	1	conserved hypothetical protein
22	CADAFLAG00007876	AFLA_064510	13.1432	8.27728	36.5456	28.8846	22.7009	34.6196	10.9107	13.4266	0.66709	0.3394	-0.60884	-0.29935	1	1	1	1	thioredoxin reductase GliT-like, putative
22	CADAFLAG00007877	AFLA_064520	22.1212	19.7991	63.2778	46.6948	39.3037	58.2914	17.6504	32.0298	0.16	0.43844	-0.56862	-0.85971	1	0.9059	1	1	O-methyltransferase GliM-like, putative
22	CADAFLAG00007878	AFLA_064530	4.77192	2.04769	12.3263	21.0903	7.65683	12.5589	7.97081	3.33487	1.2206	-0.77483	-0.71389	1.2571	1	0.95296	1	1	glutathione S-transferase GliG-like, putative
22	CADAFLAG00007879	AFLA_064540	1.21342	0.63161	3.02694	4.02059	1.88082	3.22225	1.51773	1.01789	0.94197	-0.40955	-0.77671	0.57634	1	1	1	1	cytochrome P450 oxidoreductase GliC
22	CADAFLAG00007880	AFLA_064550	6.02623	0.392236	4.75357	9.05226	2.95281	15.9462	3.414	0.649546	3.9415	-0.92926	-2.4331	2.394	1	1	1	1	membrane dipeptidase GliJ-like, putative
22	CADAFLAG00007881	AFLA_064560	2.38596	0.63161	1.76961	0	1.0992	6.27947	0	1.01789	1.9175		-2.5142		1	1	1	1	nonribosomal peptide synthase GliP-like, putative
22	CADAFLAG00007882	AFLA_064570	1.21342	0.196118	1.40959	0	0.875604	3.22225	0	0.324773	2.6293		-1.8797		1	1	1	1	uracil permease, putative
22	CADAFLAG00007883	AFLA_064580	3.51762	0.196118	1.83051	0	1.1368	9.17167	0	0.324773	4.1648		-3.0122		1	1	1	1	oxidoreductase, putative
22	CADAFLAG00007884	AFLA_064590	1.82013	0	0	1.25792	0	4.83337	0.474066	0					1	1	1	1	O-methyltransferase, putative
22	CADAFLAG00007885	AFLA_064600	0	0	0.360012	0	0.223601	0	0	0						1	1		conserved hypothetical protein
22	CADAFLAG00007886	AFLA_064610	2.99267	4.53088	135.14	35.3973	83.9383	7.89059	13.3802	7.36286	-0.59836	1.9327	3.4111	0.86176	1	0.00014093	0.064028	1	short-chain oxidoreductase, putative
23	CADAFLAG00008090	AFLA_066660	0	0	0	0	0	0	0	0									sugar transporter, putative
23	CADAFLAG00008091	AFLA_066670	0	0.435492	2.12962	1.50475	1.32281	0	0.569601	0.693116		0.50107		-0.28314	1	1	1	1	conserved hypothetical protein
23	CADAFLAG00008092	AFLA_066680	0	0	0.689571	3.0095	0.428403	0	1.1392	0		-2.1258				1	1	1	beta-galactosidase, putative
23	CADAFLAG00008093	AFLA_066690	0	1.02385	0.854351	1.25792	0.530804	0	0.474066	1.66744		-0.55814		-1.8145	1	1	1	1	pyrroline-5-carboxylate reductase, putative
23	CADAFLAG00008094	AFLA_066700	5.94446	3.85601	2.25143	29.1552	1.398	15.6162	11.0027	6.3014	0.62444	-3.6948	-3.4816	0.80411	1	0.090157	1	1	P450 family sporulation-specific N-formyltyrosine oxidase Dit2
23	CADAFLAG00008095	AFLA_066710	3.03355	3.7464	4.28969	9.79275	2.66441	8.05562	3.70061	6.06377	-0.3045	-1.1908	-1.5962	-0.71245	1	0.95312	1	1	conserved hypothetical protein
23	CADAFLAG00008096	AFLA_066720	2.38596	4.81351	5.14404	9.54592	3.19521	6.27947	3.60507	7.77477	-1.0125	-0.89198	-0.97473	-1.1088	1	1	1	1	nonribosomal peptide synthase, putative
23	CADAFLAG00008097	AFLA_066730	97.1016	71.3375	307.088	291.609	190.738	256.216	110.151	115.75	0.44483	0.074619	-0.42577	-0.07153	1	1	1	1	alcohol dehydrogenase, putative
23	CADAFLAG00008098	AFLA_066740	7.80548	8.84254	24.0599	16.8466	14.9436	20.6146	6.35393	14.2505	-0.17997	0.51417	-0.46413	-1.1653	1	1	1	1	MSF multidrug transporter, putative
23	CADAFLAG00008099	AFLA_066750	34.0446	12.9409	9.98897	32.1647	6.20442	88.8245	12.1419	21.1776	1.3955	-1.6871	-3.8396	-0.80255	1	0.20995	1	1	periplasmic beta-glucosidase precursor, putative
23	CADAFLAG00008100	AFLA_066760	6.55117	0.784473	44.4533	12.0618	27.6117	17.2273	4.5532	1.29909	3.062	1.8819	0.68058	1.8094	1	0.1227	1	1	conserved hypothetical protein
23	CADAFLAG00008101	AFLA_066770	10.6755	8.36379	48.5173	45.978	30.1361	28.0101	17.3602	13.5138	0.35208	0.077556	0.10555	0.36135	1	1	1	1	oxidoreductase, FAD-binding, putative
23	CADAFLAG00008102	AFLA_066780	0	0	6.23659	2.51584	3.87442	0	0.948133	0		1.3097				1	1	1	geranylgeranyl pyrophosphate synthase, putative
23	CADAFLAG00008103	AFLA_066790	0	0	0.689571	0	0.428403	0	0	0						1	1		conserved hypothetical protein
23	CADAFLAG00008104	AFLA_066800	0	0	1.08004	1.25792	0.670802	0	0.474066	0		-0.21996				1	1	1	cytochrome B2, putative
23	CADAFLAG00008105	AFLA_066810	18.9651	13.0043	53.5199	40.4527	33.2413	49.7407	15.2729	21.1143	0.54436	0.40384	-0.58145	-0.46725	1	1	1	1	conserved hypothetical protein
23	CADAFLAG00008106	AFLA_066820	37.3643	36.5296	171.562	167.758	106.56	98.0353	63.3807	59.3148	0.032592	0.032349	0.12029	0.095653	1	1	1	1	quinone oxidoreductase, putative
23	CADAFLAG00008107	AFLA_066830	11.7663	4.48762	15.4196	19.5855	9.57723	30.7373	7.40121	7.31929	1.3906	-0.34502	-1.6823	0.016058	1	1	1	1	conserved hypothetical protein
23	CADAFLAG00008108	AFLA_066840	20.1376	20.0587	76.1844	69.5841	47.3222	52.7979	26.2792	32.2913	0.0056664	0.13074	-0.15796	-0.29722	1	1	1	1	hybrid PKS/NRPS enzyme, putative
23	CADAFLAG00008109	AFLA_066850	1.77925	4.13864	9.54302	9.54592	5.9264	4.66835	3.60507	6.71331	-1.2179	-0.0004385	0.34425	-0.897	1	1	1	1	conserved hypothetical protein
23	CADAFLAG00008110	AFLA_066860	41.0863	29.6252	141.334	103.254	87.7855	108.032	38.9906	48.1616	0.47183	0.45292	-0.29941	-0.30475	1	0.6763	1	1	conserved hypothetical protein
23	CADAFLAG00008111	AFLA_066870	5.33775	5.29225	19.3009	6.78325	11.9888	14.005	2.5614	8.51146	0.012351	1.5086	-0.22425	-1.7325	1	0.67933	1	1	conserved hypothetical protein
23	CADAFLAG00008112	AFLA_066880	7.03524	10.9536	29.3812	28.1441	18.2497	18.3433	10.6241	17.522	-0.63874	0.062062	-0.0073863	-0.72182	1	1	1	1	monocarboxylate transporter, putative
23	CADAFLAG00008113	AFLA_066890	9.50297	6.75159	29.3382	18.0808	18.2225	24.9529	6.83161	10.872	0.49315	0.69833	-0.45349	-0.67032	1	0.90694	1	1	cytochrome P450, putative
23	CADAFLAG00008114	AFLA_066900	0	2.52644	9.56805	10.557	5.94322	0	3.9836	4.07156		-0.1419		-0.031508	1	1	1	1	conserved hypothetical protein
23	CADAFLAG00008115	AFLA_066910	0	0.435492	1.83051	2.76267	1.1368	0	1.04367	0.693116		-0.59382		0.59049	1	1	1	1	conserved hypothetical protein
23	CADAFLAG00008116	AFLA_066920	2.95179	6.07673	11.1604	18.3276	6.93162	7.72557	6.92714	9.81055	-1.0417	-0.71563	-0.15645	-0.50207	1	0.99728	1	1	alcohol dehydrogenase, putative
23	CADAFLAG00008117	AFLA_066930	29.7632	40.5326	120.941	198.195	75.1174	78.2458	74.8539	65.3826	-0.44555	-0.71262	-0.058866	0.19517	1	0.13451	1	1	cytochrome P450, putative
23	CADAFLAG00008118	AFLA_066940	26.6888	55.4519	120.684	168.546	74.9586	70.0252	63.6601	89.4436	-1.055	-0.48191	0.09822	-0.49059	1	0.49965	1	1	O-methyltransferase, putative
23	CADAFLAG00008119	AFLA_066950	173.411	221.393	1177.13	1111.75	731.137	456.994	419.911	360.792	-0.35241	0.082442	0.67797	0.21892	1	1	0.97045	1	conserved hypothetical protein
23	CADAFLAG00008120	AFLA_066960	323.428	455.64	2263.45	2399.69	1405.85	849.717	906.444	738.857	-0.49445	-0.084325	0.72639	0.29492	1	1	0.30453	1	hypothetical protein
23	CADAFLAG00008121	AFLA_066970	1177.2	1646.74	7134.21	6644.42	4431.14	3102	2509.86	2683.8	-0.48425	0.10261	0.51448	-0.096669	1	0.79434	1	1	conserved hypothetical protein
23	CADAFLAG00008122	AFLA_066980	105.426	180.404	1188.93	715.768	738.479	277.248	270.274	292.914	-0.77501	0.7321	1.4134	-0.11606	1	0.0015896	0.015349	1	polyketide synthase, putative
24	CADAFLAG00008357	AFLA_069330	255.373	163.435	346.658	530.375	215.327	671.369	200.26	265.261	0.64389	-0.6135	-1.6406	-0.40554	1	0.31327	0.064266	1	nonribosomal peptide synthase Pes1
24	CADAFLAG00008358	AFLA_069340	29.9267	44.9568	148.047	239.612	91.9567	78.9059	90.5125	72.7652	-0.58711	-0.69464	0.22082	0.31487	1	0.11941	1	1	MSF drug transporter, putative
24	CADAFLAG00008359	AFLA_069350	89.3305	98.912	487.511	400.81	302.802	234.903	151.431	160.319	-0.14699	0.28252	0.36631	-0.082289	1	0.57951	1	1	conserved hypothetical protein
24	CADAFLAG00008360	AFLA_069360	178.702	191.347	824.399	859.484	512.047	469.97	324.669	311.315	-0.098634	-0.060127	0.12371	0.060593	1	1	1	1	26 proteasome complex subunit Sem1, putative
24	CADAFLAG00008361	AFLA_069370	1396.23	1830.35	4869.24	8617.77	3024.36	3669.42	3255.18	2982.1	-0.39058	-0.82362	-0.27892	0.12641	1	1.5263e-10	1	1	phosphoglycerate kinase PgkA, putative
24	CADAFLAG00008362	AFLA_069380	121.234	245.921	900.136	1146.38	559.098	318.438	433.009	396.949	-1.0204	-0.34887	0.81209	0.12544	1	0.16451	0.37112	1	integral membrane protein, Mpv17/PMP22 family, putative
24	CADAFLAG00008363	AFLA_069390	41.0863	42.6727	212.763	200.958	132.15	108.032	75.8975	69.3194	-0.054657	0.082355	0.29072	0.13079	1	1	1	1	conserved hypothetical protein
24	CADAFLAG00008364	AFLA_069400	120.471	97.9516	411.135	355.962	255.368	317.031	134.431	158.589	0.29854	0.20789	-0.31205	-0.23842	1	0.85888	1	1	formin binding protein (FNB3), putative
24	CADAFLAG00008365	AFLA_069410	461.261	388.834	1852.08	1694.47	1150.37	1214.21	640.023	632.378	0.24643	0.12831	-0.07792	0.017335	1	0.81816	1	1	RNase L inhibitor of the ABC superfamily, putative
24	CADAFLAG00008366	AFLA_069420	92.1252	81.4432	385.739	354.504	239.594	242.832	133.854	132.036	0.1778	0.12182	-0.019365	0.019729	1	1	1	1	chromodomain helicase (Chd1), putative
25	CADAFLAG00008497	AFLA_070730	84.6403	97.6547	473.607	441.827	294.17	222.674	166.884	158.799	-0.20634	0.10021	0.40172	0.071649	1	1	1	1	C6 transcription factor (War1), putative
25	CADAFLAG00008498	AFLA_070740	1.21342	1.65546	19.8006	9.29909	12.298	3.22225	3.50954	2.68533	-0.44815	1.0904	1.9323	0.38618	1	0.88522	1	1	hypothetical protein
25	CADAFLAG00008499	AFLA_070750	0	0.784473	5.59541	4.02059	3.47521	0	1.51773	1.29909		0.47684		0.22441	1	1	1	1	hypothetical protein
25	CADAFLAG00008500	AFLA_070760	86.0173	114.503	388.092	588.249	241.053	226.556	222.199	185.185	-0.41269	-0.60003	0.089482	0.26289	1	0.027354	1	1	MFS transporter Fmp42, putative
25	CADAFLAG00008501	AFLA_070770	32.6332	43.6302	205.599	171.85	127.699	85.6414	64.8877	70.7928	-0.41899	0.25868	0.57637	-0.12566	1	0.92991	1	1	conserved hypothetical protein
25	CADAFLAG00008502	AFLA_070780	289.069	324.987	861.524	1601.49	535.105	761.301	604.792	532.316	-0.16897	-0.89446	-0.50865	0.18416	1	5.687e-06	0.89626	1	acetamidase, putative
25	CADAFLAG00008503	AFLA_070790	19.0468	16.5344	78.5255	46.2011	48.7721	50.0707	17.4594	26.9602	0.20408	0.76523	-0.037911	-0.62683	1	0.43329	1	1	hypothetical protein
25	CADAFLAG00008504	AFLA_070800	138.14	179.761	1031.57	1174.51	640.733	363.219	443.501	290.867	-0.37994	-0.18723	0.81888	0.60858	1	0.83504	0.43123	1	conserved hypothetical protein
25	CADAFLAG00008505	AFLA_070810	140.002	170.619	670.846	847.047	416.678	368.217	319.907	276.569	-0.28533	-0.33646	0.17838	0.21001	1	0.22891	1	1	cholinesterase, putative
25	CADAFLAG00008506	AFLA_070820	82.8954	139.695	535.607	880.048	332.677	217.306	332.321	225.191	-0.75292	-0.71641	0.61439	0.56143	1	0.018638	0.94934	1	3-hydroxymethyl-3-methylglutaryl-Coenzyme A lyase, putative
25	CADAFLAG00008507	AFLA_070830	9.98703	15.2019	101.647	66.8214	63.135	26.0689	25.2355	24.4729	-0.60612	0.60518	1.2761	0.044268	1	0.5715	0.75917	1	ankyrin repeat protein
25	CADAFLAG00008508	AFLA_070840	0.606711	8.68968	56.5164	21.0903	35.1033	1.61112	7.97081	13.9692	-3.8402	1.4221	4.4455	-0.80946	1	0.14805	0.46397	1	MFS transporter, putative
25	CADAFLAG00008509	AFLA_070850	4.73104	133.428	152.097	620.39	94.4683	12.3939	234.344	213.662	-4.8178	-2.0282	2.9302	0.1333	1	4.0625e-17	0.042436	1	phosphatidylserine decarboxylase family protein
25	CADAFLAG00008510	AFLA_070860	3.59938	7.81869	38.9672	24.1235	24.2033	9.50172	9.10641	12.583	-1.1192	0.69182	1.3489	-0.46652	1	0.88522	1	1	ACV synthetase PcbAB
25	CADAFLAG00008511	AFLA_070870	1.21342	3.26766	32.8345	13.8133	20.3937	3.22225	5.21834	5.32708	-1.4292	1.2492	2.662	-0.029754	1	0.51721	1	1	isopenicillin N synthetase PcbC
25	CADAFLAG00008512	AFLA_070880	2.38596	1.6122	11.4899	4.26742	7.13642	6.27947	1.61327	2.64176	0.56554	1.4289	0.18456	-0.71151	1	0.90555	1	1	acyl-coenzyme A:Isopenicillin N acyltransferase PenDE
25	CADAFLAG00008513	AFLA_070890	0	0	0	0	0	0	0	0									hypothetical protein
25	CADAFLAG00008514	AFLA_070900	0	0	0.360012	0	0.223601	0	0	0						1	1		conserved hypothetical protein
25	CADAFLAG00008515	AFLA_070910	0	0	20.1302	38.1599	12.5028	0	14.4239	0		-0.9227				0.82471	1	0.069661	aminotransferase, putative
25	CADAFLAG00008516	AFLA_070920	0	0	5.69928	2.51584	3.54001	0	0.948133	0		1.1797				1	1	1	NRPS-like enzyme, putative
25	CADAFLAG00008517	AFLA_070930	157.078	180.525	1115.57	634.346	692.901	414.523	239.541	292.273	-0.20072	0.81444	0.7412	-0.28704	1	1.8404e-05	1	1	sugar transporter, putative
25	CADAFLAG00008518	AFLA_070940	30.2881	17.3189	76.1343	81.3515	47.2885	79.5269	30.744	28.2593	0.80641	-0.095622	-0.74995	0.12158	1	1	1	1	extracellular rhamnogalacturonase, putative
25	CADAFLAG00008519	AFLA_070950	7.68283	13.5695	63.2903	42.9448	39.3121	20.1195	16.2246	21.9381	-0.82066	0.5595	0.96638	-0.43525	1	0.77407	1	1	C4-dicarboxylate transporter/malic acid transport protein, putative
25	CADAFLAG00008520	AFLA_070960	37.5687	36.9882	126.756	101.972	78.7306	98.8604	38.5202	60.1584	0.022464	0.31389	-0.32847	-0.64315	1	0.8846	1	1	involucrin, putative
25	CADAFLAG00008521	AFLA_070970	3.5585	28.2927	174.743	175.035	108.539	9.33669	66.1332	45.6743	-2.9911	-0.0024088	3.5392	0.53399	1	1	0.0080375	1	C6 transcription factor, putative
25	CADAFLAG00008522	AFLA_070980	8.28954	19.1877	144.587	135.371	89.8063	21.7306	51.1397	30.905	-1.2108	0.095019	2.0471	0.7266	1	1	0.24413	1	C6 transcription factor, putative
26	CADAFLAG00000714	AFLA_079320	6.55117	6.35935	37.8317	27.133	23.4969	17.2273	10.2456	10.2225	0.042873	0.47955	0.44777	0.0032627	1	1	1	1	conserved hypothetical protein
26	CADAFLAG00000715	AFLA_079330	0	0	2.52008	0	1.5652	0	0	0						1	1		amino acid transporter, putative
26	CADAFLAG00000716	AFLA_079340	0	0	0	0	0	0	0	0									dienelactone hydrolase, putative
26	CADAFLAG00000717	AFLA_079350	1.21342	3.02828	16.659	18.845	10.3485	3.22225	7.11461	4.95874	-1.3194	-0.17788	1.6833	0.52081	1	1	1	1	conserved hypothetical protein
26	CADAFLAG00000718	AFLA_079360	0	0	1.73915	0	1.08041	0	0	0						1	1		PKS-like enzyme, putative
26	CADAFLAG00000719	AFLA_079370	3.59938	3.2013	10.9167	17.8339	6.78123	9.50172	6.73607	5.13302	0.16909	-0.70808	-0.48664	0.3921	1	0.97972	1	1	hypothetical protein
26	CADAFLAG00000720	AFLA_079380	102.433	74.2792	361.581	383.565	224.577	269.357	144.872	120.622	0.46365	-0.085152	-0.26231	0.26428	1	1	1	1	NRPS-like enzyme, putative
26	CADAFLAG00000721	AFLA_079390	0	0	0.854351	1.25792	0.530804	0	0.474066	0		-0.55814				1	1	1	hypothetical protein
26	CADAFLAG00000722	AFLA_079400	198.525	160.207	923.741	552.947	573.764	523.176	208.804	259.72	0.30938	0.74035	0.13316	-0.31481	1	0.00037342	1	1	NRPS-like enzyme, putative
26	CADAFLAG00000723	AFLA_079410	8.89626	6.79485	41.7559	19.5855	25.9357	23.3417	7.40121	10.9156	0.38876	1.0922	0.15203	-0.56056	1	0.47421	1	1	MFS transporter, putative
26	CADAFLAG00000724	AFLA_079420	16.0133	4.46452	7.76799	29.1314	4.82522	42.0151	11.0063	7.1688	1.8427	-1.907	-3.1222	0.61852	1	0.22141	0.71775	1	conserved hypothetical protein
26	CADAFLAG00000725	AFLA_079430	4.8128	4.35785	21.8514	41.1932	13.5729	12.724	15.5595	7.18858	0.14326	-0.91468	0.093176	1.114	1	0.5989	1	1	amidase, putative
26	CADAFLAG00000726	AFLA_079440	3.5585	7.42646	42.9273	23.6299	26.6629	9.33669	8.91534	11.9335	-1.0614	0.86129	1.5138	-0.42065	1	0.76981	1	1	allantoate permease, putative
26	CADAFLAG00000727	AFLA_079450	57.1813	46.918	115.92	182.312	72.0019	150.377	68.8857	76.0129	0.2854	-0.65328	-1.0625	-0.14204	1	0.48875	0.92419	1	ureidoglycolate hydrolase, putative
26	CADAFLAG00000728	AFLA_079460	13.1432	17.688	75.3659	55.7708	46.8122	34.6196	21.0608	28.7583	-0.42845	0.4344	0.43529	-0.44942	1	0.89897	1	1	DNA mismatch repair protein Msh1, putative
26	CADAFLAG00000729	AFLA_079470	186.875	148.818	590.417	531.315	366.723	492.07	200.649	241.505	0.32853	0.15217	-0.42417	-0.26738	1	0.94736	1	1	pre-mRNA splicing helicase, putative
26	CADAFLAG00000730	AFLA_079480	165.804	144.91	714.911	557.095	444.041	436.341	210.435	236.297	0.19432	0.35984	0.025237	-0.16722	1	0.21977	1	1	oligopeptidase family protein
26	CADAFLAG00000731	AFLA_079490	2.95179	0.980591	9.82419	5.03167	6.10202	7.72557	1.89627	1.62387	1.5899	0.9653	-0.34035	0.22373	1	1	1	1	conserved hypothetical protein
26	CADAFLAG00000732	AFLA_079500	492.182	170.677	595.194	1716.08	369.688	1298.8	648.181	277.899	1.5279	-1.5277	-1.8128	1.2218	1	1.1117e-19	0.5492	0.43362	xylosidase, putative
26	CADAFLAG00000733	AFLA_079510	11.364	16.4219	72.991	83.9149	45.3345	29.9512	31.685	26.4651	-0.53115	-0.20121	0.59799	0.25971	1	1	1	1	MFS transporter, putative
27	CADAFLAG00000995	AFLA_082150	4.85368	4.1819	6.74886	12.0618	4.19202	12.889	4.5532	6.75688	0.21492	-0.83772	-1.6204	-0.56948	1	0.97562	1	1	polyketide synthase, putative
27	CADAFLAG00000996	AFLA_082160	20.9487	33.9973	510.064	75.6031	316.812	55.2341	28.5576	54.7284	-0.69856	2.7542	2.52	-0.93842	1	4.2579e-23	0.00088264	1	MFS glucose transporter, putative
27	CADAFLAG00000997	AFLA_082170	0	0.196118	1.50095	0	0.931999	0	0	0.324773					1	1	1	1	efflux pump antibiotic resistance protein, putative
27	CADAFLAG00000998	AFLA_082180	56.8199	73.0765	220.986	196.197	137.265	149.756	74.0932	118.265	-0.36301	0.17165	-0.12566	-0.67461	1	1	1	1	hypothetical protein
27	CADAFLAG00000999	AFLA_082190	0	0	2.06871	1.50475	1.28521	0	0.569601	0		0.45921				1	1	1	conserved hypothetical protein
27	CADAFLAG00001000	AFLA_082200	8.89626	7.49281	91.5969	17.0697	56.893	23.3417	6.45308	12.1275	0.24769	2.4239	1.2853	-0.91023	1	0.00028617	0.98827	1	AAA family ATPase, putative
27	CADAFLAG00001001	AFLA_082210	6.55117	3.15805	7.78051	22.1013	4.83363	17.2273	8.34934	5.08945	1.0527	-1.5062	-1.8335	0.71415	1	0.52936	1	1	conserved hypothetical protein
27	CADAFLAG00001002	AFLA_082220	10.1506	8.32054	25.7561	21.114	15.9968	26.729	7.9672	13.4702	0.28681	0.28671	-0.74062	-0.75763	1	1	1	1	short-chain dehydrogenase, putative
27	CADAFLAG00001003	AFLA_082230	119.911	83.8428	346.023	289.786	214.918	316.449	109.497	136.235	0.51621	0.25588	-0.55818	-0.31521	1	0.86013	1	1	pantothenate transporter, putative
27	CADAFLAG00001004	AFLA_082240	145.905	121.065	622.229	415.364	386.475	383.669	156.936	196.247	0.26925	0.58307	0.010513	-0.32249	1	0.062436	1	1	conserved hypothetical protein
27	CADAFLAG00001005	AFLA_082250	1.82013	2.83216	3.1792	11.5443	1.97481	4.83337	4.36574	4.63396	-0.63786	-1.8604	-1.2913	-0.08602	1	0.86579	1	1	GMC oxidoreductase, putative
27	CADAFLAG00001006	AFLA_082260	1.17254	0.435492	0.720023	4.02059	0.447201	3.05722	1.51773	0.693116	1.4289	-2.4813	-2.7732	1.1308	1	0.90986	1	1	glycosyl transferase, putative
27	CADAFLAG00001007	AFLA_082270	0	1.69871	3.63057	5.52533	2.2548	0	2.08734	2.7289		-0.60587		-0.38665	1	1	1	1	UDP-glucose dehydrogenase
27	CADAFLAG00001008	AFLA_082280	271.311	291.39	438.956	1730.29	272.641	713.918	653.605	475.191	-0.103	-1.9789	-1.3888	0.45991	1	1.1216e-30	0.090351	1	glutathione S-transferase, putative
28	CADAFLAG00001020	AFLA_082400	48.2442	34.2657	95.6968	140.744	59.4382	126.87	53.1171	55.7621	0.49359	-0.55653	-1.0939	-0.070108	1	0.88824	0.96567	1	ABC multidrug transporter, putative
28	CADAFLAG00001021	AFLA_082410	51.6392	48.0716	225.699	303.67	140.183	135.547	114.704	77.8111	0.10328	-0.42811	0.04852	0.55987	1	0.38164	1	1	conserved hypothetical protein
28	CADAFLAG00001022	AFLA_082420	0	0.827728	2.06871	2.76267	1.28521	0	1.04367	1.34266		-0.41733		-0.36343	1	1	1	1	hypothetical protein
28	CADAFLAG00001023	AFLA_082430	4.24697	7.62257	24.4808	11.0507	15.2048	11.2779	4.17467	12.2582	-0.84384	1.1475	0.43104	-1.554	1	0.72393	1	1	conserved hypothetical protein
28	CADAFLAG00001024	AFLA_082440	0	0	0.720023	0	0.447201	0	0	0						1	1		conserved hypothetical protein
28	CADAFLAG00001025	AFLA_082450	0	0.196118	0	0	0	0	0	0.324773					1			1	bicyclomycin resistance protein, putative
28	CADAFLAG00001026	AFLA_082460	1.77925	5.55472	16.1092	38.9242	10.0056	4.66835	14.7069	9.0303	-1.6424	-1.2728	1.0998	0.70365	1	0.38844	1	1	conserved hypothetical protein
28	CADAFLAG00001027	AFLA_082470	1.17254	0	0.555244	1.50475	0.3448	3.05722	0.569601	0		-1.4383	-3.1484		1	1	1	1	AMP dependent CoA ligase, putative
28	CADAFLAG00001028	AFLA_082480	0	0	0	0	0	0	0	0									NRPS-like enzyme, putative
29	CADAFLAG00001104	AFLA_083240	598.207	306.355	1102.59	2101.83	684.841	1576.8	793.784	499.553	0.96544	-0.93076	-1.2032	0.66811	1	2.5021e-09	0.29354	1	xylitol dehydrogenase LadA/XdhB
29	CADAFLAG00001105	AFLA_083250	1.17254	0	1.11049	0	0.6896	3.05722	0	0			-2.1484		1	1	1		dimethylallyl tryptophan synthase, putative
29	CADAFLAG00001106	AFLA_083260	21.9986	20.9326	67.2021	81.6459	41.7426	57.7963	30.8324	33.9349	0.071662	-0.28087	-0.46946	-0.13832	1	0.98079	1	1	hypothetical protein
29	CADAFLAG00001107	AFLA_083270	57.9924	53.3698	236.884	81.6459	147.132	152.813	30.8324	86.8374	0.11984	1.5367	-0.054664	-1.4939	1	4.6151e-05	1	0.30475	GABA permease, putative
29	CADAFLAG00001108	AFLA_083280	2.99267	2.72256	10.2272	4.26742	6.35283	7.89059	1.61327	4.39633	0.13647	1.261	-0.31273	-1.4463	1	0.97975	1	1	hypothetical protein
29	CADAFLAG00001109	AFLA_083290	4.20609	8.51665	37.4842	39.9353	23.2817	11.1128	15.0854	13.795	-1.0178	-0.091381	1.067	0.12901	1	1	1	1	translation initiation factor eif-2B, putative
29	CADAFLAG00001110	AFLA_083300	25.7615	50.1857	330.517	246.618	205.287	67.9581	93.173	81.34	-0.96206	0.42245	1.5949	0.19595	1	0.3152	0.29894	1	alpha-glucosidase, putative
29	CADAFLAG00001111	AFLA_083310	12.5774	13.7022	70.6482	79.3769	43.8801	33.1735	29.9798	22.3262	-0.12358	-0.16807	0.40354	0.42525	1	1	1	1	TIM barrel metal-dependent hydrolase, putative
29	CADAFLAG00001112	AFLA_083320	16.6609	13.832	96.2358	60.062	59.777	43.7913	22.6705	22.4569	0.26845	0.68012	0.44895	0.013655	1	0.66249	1	1	MFS quinate transporter, putative
29	CADAFLAG00001113	AFLA_083330	112.502	126.562	693.733	544.659	430.902	295.756	205.673	205.855	-0.1699	0.34903	0.54295	-0.0012777	1	0.3618	0.98805	1	C6 transcription factor, putative
30	CADAFLAG00001188	AFLA_084080	0	0.435492	0.16478	1.50475	0.102401	0	0.569601	0.693116		-3.1909		-0.28314	1	1	1	1	dimethylallyl tryptophan synthase, putative
30	CADAFLAG00001189	AFLA_084090	1.17254	3.7464	17.8179	16.0823	11.0672	3.05722	6.07094	6.06377	-1.6759	0.14785	1.856	0.001705	1	1	1	1	C6 transcription factor, putative
30	CADAFLAG00001190	AFLA_084100	0.606711	0.435492	4.7106	11.0507	2.92561	1.61112	4.17467	0.693116	0.47836	-1.2301	0.86067	2.5905	1	0.89538	1	1	2-oxoglutarate dehydrogenase, putative
30	CADAFLAG00001191	AFLA_084110	0	0.196118	2.62396	3.0095	1.63001	0	1.1392	0.324773		-0.19778		1.8105	1	1	1	1	2-oxoglutarate dehydrogenase, putative
30	CADAFLAG00001192	AFLA_084120	0	1.26322	3.7649	11.2975	2.33841	0	4.27021	2.03578		-1.5853		1.0687	1	0.80121	1	1	2-oxoglutarate dehydrogenase, putative
30	CADAFLAG00001193	AFLA_084130	0.606711	2.61295	10.8738	8.04117	6.75402	1.61112	3.03547	4.1587	-2.1066	0.43538	2.0677	-0.45421	1	1	1	1	alpha-ketoglutarate dehydrogenase complex subunit Kgd1, putative
30	CADAFLAG00001194	AFLA_084140	16.7017	27.1391	114.845	190.401	71.333	43.9563	71.9139	43.8762	-0.70037	-0.72935	0.6985	0.71283	1	0.13941	1	1	dihydrolipoamide acetyltransferase component of pyruvate dehydrogenase, putative
30	CADAFLAG00001195	AFLA_084150	89.5349	96.6136	354.274	464.94	220.047	235.728	175.612	157.495	-0.10978	-0.39218	-0.099311	0.15708	1	0.30273	1	1	peroxisome biosynthesis protein (Peroxine-7), putative
30	CADAFLAG00001196	AFLA_084160	171.305	179.118	1210.39	921.098	751.811	451.006	347.902	290.728	-0.064342	0.39405	0.73722	0.25901	1	0.072531	0.70418	1	DUF1014 domain protein
30	CADAFLAG00001197	AFLA_084170	2.99267	3.68005	3.27056	0	2.0312	7.89059	0	5.8697	-0.29829		-1.9578		1	1	1	1	L-ascorbate oxidase, putative
30	CADAFLAG00001198	AFLA_084180	4.16521	3.39742	7.42592	21.6077	4.61201	10.9478	8.15827	5.45779	0.29395	-1.5409	-1.2472	0.57995	1	0.45839	1	1	hypothetical protein
30	CADAFLAG00001199	AFLA_084190	36.437	44.8762	143.098	238.847	88.8827	95.9682	90.2295	73.1929	-0.30055	-0.73908	-0.11065	0.3019	1	0.093678	1	1	conserved hypothetical protein
30	CADAFLAG00001200	AFLA_084200	30.3699	38.2284	194.438	110.754	120.768	79.857	41.8423	62.0437	-0.332	0.81196	0.59674	-0.56832	1	0.075379	1	1	C6 transcription factor, putative
30	CADAFLAG00001201	AFLA_084210	17.9152	15.1183	85.0253	42.6979	52.8118	47.1785	16.1291	24.6432	0.24488	0.99373	0.16273	-0.61152	1	0.22891	1	1	hypothetical protein
31	CADAFLAG00008702	AFLA_090170	9.66649	10.2847	6.65751	95.1886	4.13562	25.6129	35.9588	16.9753	-0.08943	-3.8377	-2.6307	1.0829	1	1.6751e-09	1	1	MFS sugar transporter, putative
31	CADAFLAG00008703	AFLA_090180	2.99267	0.196118	1.86096	4.26742	1.1556	7.89059	1.61327	0.324773	3.9316	-1.1973	-2.7715	2.3125	1	1	1	1	alpha/beta hydrolase, putative
31	CADAFLAG00008704	AFLA_090190	0	0	0	0	0	0	0	0									dimethylallyl tryptophan synthase, putative
31	CADAFLAG00008705	AFLA_090200	0	0	0	0	0	0	0	0									nonribosomal peptide synthase, putative
31	CADAFLAG00008706	AFLA_090210	82.0156	96.6481	467.234	202.933	290.207	216.268	76.6618	156.767	-0.23684	1.2031	0.42426	-1.032	1	3.2304e-06	1	0.97265	amino acid permease, putative
32	CADAFLAG00009358	AFLA_096740	0	0	1.08004	1.25792	0.670802	0	0.474066	0		-0.21996				1	1	1	monoxygenase, putative
32	CADAFLAG00009359	AFLA_096750	0	0.435492	2.02574	0	1.258	0	0	0.693116					1	1	1	1	cytochrome P450, putative
32	CADAFLAG00009360	AFLA_096760	0.606711	0	1.37914	1.25792	0.856806	1.61112	0.474066	0		0.13273	-0.91103		1	1	1	1	monocarboxylate transporter, putative
32	CADAFLAG00009361	AFLA_096770	0	0	0	0	0	0	0	0									polyketide synthase, putative
33	CADAFLAG00011906	AFLA_101690	115.699	113.883	532.366	512.2	330.66	304.472	193.443	185.196	0.022816	0.055711	0.11904	0.062851	1	1	1	1	alcohol dehydrogenase, putative
33	CADAFLAG00011907	AFLA_101700	13.1432	11.9372	59.8245	45.2138	37.1597	34.6196	17.0772	19.4033	0.13886	0.40398	0.10215	-0.18423	1	0.96197	1	1	NRPS-like enzyme, putative
33	CADAFLAG00011908	AFLA_101710	4.73104	10.6076	42.5548	51.7264	26.4309	12.3939	19.5467	17.1734	-1.1649	-0.28158	1.0926	0.18675	1	1	1	1	NmrA-like family protein
33	CADAFLAG00011909	AFLA_101720	0	0	0.329559	0	0.204802	0	0	0						1	1		cytochrome P450, putative
33	CADAFLAG00011910	AFLA_101730	0	0	0	0	0	0	0	0									ferulate-5-hydroxylase, putative
33	CADAFLAG00011911	AFLA_101740	16.4973	9.82313	51.1037	28.6378	31.7409	43.1312	10.8152	15.8743	0.74798	0.83551	-0.44239	-0.55363	1	0.62708	1	1	glycerophosphoinositol/ glycerophosphocholine transporter, putative
34	CADAFLAG00004158	AFLA_104210	1.21342	1.37283	8.23188	6.78325	5.11363	3.22225	2.5614	2.27341	-0.17807	0.27924	0.66628	0.17207	1	1	1	1	PKS-like enzyme, putative
34	CADAFLAG00004159	AFLA_104220	132.966	152.374	844.803	613.455	524.742	349.874	231.673	247.759	-0.19656	0.46166	0.58477	-0.096849	1	0.065141	0.99304	1	conserved hypothetical protein
34	CADAFLAG00004160	AFLA_104230	38.0527	36.1172	127.958	124.861	79.4766	99.9764	47.1489	58.7722	0.075313	0.035346	-0.33106	-0.31791	1	1	1	1	MFS transporter, putative
34	CADAFLAG00004161	AFLA_104240	7.117	8.95215	31.2117	35.9384	19.3865	18.6734	13.5641	14.4881	-0.33096	-0.20344	0.054066	-0.095076	1	1	1	1	PKS-like enzyme, putative
34	CADAFLAG00004162	AFLA_104250	24.9913	38.71	146.38	217.534	90.9179	65.6869	82.1596	63.0378	-0.63128	-0.57153	0.46896	0.38221	1	0.25519	1	1	PKS-like enzyme, putative
35	CADAFLAG00004246	AFLA_105090	10.6755	5.66433	49.9574	38.4305	31.0305	28.0101	14.5158	9.26793	0.91433	0.37845	0.14774	0.64731	1	1	1	1	MFS sugar transporter, putative
35	CADAFLAG00004247	AFLA_105100	2.38596	3.2244	29.3508	58.5097	18.2309	6.27947	22.1081	5.28351	-0.43446	-0.99528	1.5377	2.065	1	0.41144	1	1	beta-galactosidase, putative
35	CADAFLAG00004248	AFLA_105110	1.77925	5.83735	24.9877	29.8957	15.5205	4.66835	11.2893	9.44221	-1.714	-0.25872	1.7332	0.25776	1	1	1	1	hypothetical protein
35	CADAFLAG00004249	AFLA_105120	4.77192	4.22515	19.4961	27.3798	12.11	12.5589	10.3411	6.80045	0.17557	-0.48993	-0.05251	0.60469	1	1	1	1	GNAT family acetyltransferase, putative
35	CADAFLAG00004250	AFLA_105130	132.366	184.491	686.248	791.428	426.234	349.127	298.956	300.721	-0.47902	-0.20573	0.28789	-0.0084914	1	0.70325	1	1	conserved hypothetical protein
35	CADAFLAG00004251	AFLA_105140	4.77192	3.89927	12.2583	25.6283	7.61281	12.5589	9.67601	6.34497	0.29137	-1.064	-0.72221	0.6088	1	0.63431	1	1	conserved hypothetical protein
35	CADAFLAG00004252	AFLA_105150	0	1.0671	2.77622	2.51584	1.724	0	0.948133	1.71101		0.14208		-0.85168	1	1	1	1	extracellular carboxylesterase, putative
35	CADAFLAG00004253	AFLA_105160	0	0	1.86096	0	1.1556	0	0	0						1	1		hypothetical protein
35	CADAFLAG00004254	AFLA_105170	2.38596	5.68449	33.1766	51.2328	20.6069	6.27947	19.3556	9.16101	-1.2525	-0.6269	1.7144	1.0792	1	0.79369	1	1	O-methyltransferase, putative
35	CADAFLAG00004255	AFLA_105180	0.606711	0.63161	5.89451	1.50475	3.66121	1.61112	0.569601	1.01789	-0.058025	1.9698	1.1843	-0.83756	1	1	1	1	hypothetical protein
35	CADAFLAG00004256	AFLA_105190	17.3902	32.0219	95.9725	211.045	59.6118	45.8975	79.6865	52.1024	-0.88078	-1.1369	0.37718	0.61298	1	0.024816	1	1	NRPS-like enzyme, putative
35	CADAFLAG00004257	AFLA_105200	83.1472	80.3648	313.987	232.358	195.02	219.16	87.7564	131.205	0.049105	0.43435	-0.16837	-0.58024	1	0.37053	1	1	GPI anchored endo-1,3(4)-beta-glucanase, putative
35	CADAFLAG00004258	AFLA_105210	0.606711	3.46377	7.92026	9.79275	4.91921	1.61112	3.70061	5.65185	-2.5133	-0.30617	1.6104	-0.61096	1	1	1	1	conserved hypothetical protein
35	CADAFLAG00004259	AFLA_105220	23.7779	24.1771	96.6371	113.516	60.0234	62.4646	42.8859	39.1115	-0.024025	-0.23225	-0.057515	0.13291	1	1	1	1	short-chain type dehydrogenase, putative
35	CADAFLAG00004260	AFLA_105230	0	0	0	0	0	0	0	0									conserved hypothetical protein
35	CADAFLAG00004261	AFLA_105240	19.49	10.1923	43.0187	42.9448	26.7193	51.0218	16.2246	16.3734	0.93526	0.0024815	-0.93323	-0.013167	1	1	1	1	hypothetical protein
35	CADAFLAG00004262	AFLA_105250	0.606711	7.9283	30.8517	25.1108	19.1629	1.61112	9.48855	12.8207	-3.7079	0.29704	3.5722	-0.43421	1	1	1	1	hypothetical protein
35	CADAFLAG00004263	AFLA_105260	5.37863	5.16249	26.9775	29.1552	16.7577	14.1701	11.0027	8.38075	0.059174	-0.11199	0.24198	0.3927	1	1	1	1	hypothetical protein
35	CADAFLAG00004264	AFLA_105270	63.8551	21.9736	84.4505	135.864	52.4521	168.1	51.3308	35.238	1.539	-0.68599	-1.6802	0.54269	1	0.33493	0.30674	1	conserved hypothetical protein
35	CADAFLAG00004265	AFLA_105280	79.0573	76.8489	350.35	418.444	217.608	207.678	158.064	124.737	0.040873	-0.25624	0.067379	0.34162	1	0.70757	1	1	conserved hypothetical protein
35	CADAFLAG00004266	AFLA_105290	11.8889	5.64123	41.6646	10.557	25.8793	31.2323	3.9836	9.11744	1.0755	1.9806	-0.27124	-1.1946	1	0.12787	1	1	3-beta hydroxysteroid dehydrogenase/isomerase, putative
35	CADAFLAG00004267	AFLA_105300	39.1844	41.7152	120.618	172.814	74.919	102.869	65.2734	67.846	-0.090294	-0.51877	-0.4574	-0.055769	1	0.43567	1	1	metallo-beta-lactamase domain protein, putative
36	CADAFLAG00004278	AFLA_105410	0	0.392236	1.11049	0	0.6896	0	0	0.649546					1	1	1	1	thioester reductase family protein, putative
36	CADAFLAG00004279	AFLA_105420	0	0	0	0	0	0	0	0									hypothetical protein
36	CADAFLAG00004280	AFLA_105430	0	0	0	0	0	0	0	0									fatty acid desaturase protein, putative
36	CADAFLAG00004281	AFLA_105440	0	0	0	0	0	0	0	0									cytochrome P450, putative
36	CADAFLAG00004282	AFLA_105450	0	0.392236	3.01442	2.76267	1.87241	0	1.04367	0.649546		0.12582		0.68416	1	1	1	1	polyketide synthase, putative
37	CADAFLAG00004579	AFLA_108440	30.0085	13.9185	41.4443	44.7201	25.7413	79.236	16.8861	22.5441	1.1084	-0.10975	-1.6221	-0.41691	1	1	0.82088	1	phenol 2-monooxygenase, putative
37	CADAFLAG00004580	AFLA_108450	84.238	86.476	367.776	369.281	228.44	221.888	139.459	140.286	-0.037828	-0.0058949	0.041984	-0.0085396	1	1	1	1	TOR signaling pathway phosphatase SitA
37	CADAFLAG00004581	AFLA_108460	83.5495	78.3314	448.306	404.878	278.45	219.946	152.942	127.248	0.093042	0.147	0.34027	0.26534	1	0.93777	1	1	nonsense-mediated mRNA decay protein Upf3, putative
37	CADAFLAG00004582	AFLA_108470	0	0	0.360012	0	0.223601	0	0	0						1	1		serine/threonine-protein kinase ripk4, putative
37	CADAFLAG00004583	AFLA_108480	0	0	0	0	0	0	0	0									conserved hypothetical protein
37	CADAFLAG00004584	AFLA_108490	0	0	0	0	0	0	0	0									conserved hypothetical protein
37	CADAFLAG00004585	AFLA_108500	0	0	0	0	0	0	0	0									conserved hypothetical protein
37	CADAFLAG00004586	AFLA_108510	0	0	0.524791	0	0.326002	0	0	0						1	1		conserved hypothetical protein
37	CADAFLAG00004587	AFLA_108520	0.606711	0.870983	1.87348	1.25792	1.16401	1.61112	0.474066	1.38623	-0.52164	0.57468	-0.46896	-1.548	1	1	1	1	hypothetical protein
37	CADAFLAG00004588	AFLA_108530	0	0	0	0	0	0	0	0									conserved hypothetical protein
37	CADAFLAG00004589	AFLA_108540	104.492	66.1951	236.562	238.425	146.933	274.316	90.0276	107.263	0.65859	-0.01132	-0.90068	-0.25271	1	1	1	1	NADH oxidase, putative
37	CADAFLAG00004590	AFLA_108550	0	0	1.99529	2.76267	1.2392	0	1.04367	0		-0.46946				1	1	1	polyketide synthase, putative
37	CADAFLAG00004591	AFLA_108560	0	0	0	0	0	0	0	0									O-methyltransferase, putative
37	CADAFLAG00004592	AFLA_108570	0	0	0	0	0	0	0	0									conserved hypothetical protein
37	CADAFLAG00004593	AFLA_108580	0	0	0	0	0	0	0	0									cytochrome P450, putative
37	CADAFLAG00004594	AFLA_108590	0	0	0.360012	0	0.223601	0	0	0						1	1		acid phosphatase, putative
37	CADAFLAG00004595	AFLA_108600	0	0.196118	2.52008	0	1.5652	0	0	0.324773					1	1	1	1	conserved hypothetical protein
37	CADAFLAG00004596	AFLA_108610	5.29687	1.17671	4.51537	6.53642	2.80441	13.84	2.46587	1.94864	2.1704	-0.53366	-2.3031	0.33963	1	1	1	1	cytochrome P450, putative
38	CADAFLAG00004672	AFLA_109380	1.21342	59.2731	72.0703	180.537	44.7641	3.22225	68.2242	94.5648	-5.6102	-1.3248	3.7962	-0.47102	1	0.26458	0.40056	1	alcohol dehydrogenase, putative
38	CADAFLAG00004673	AFLA_109390	79.5822	234.178	1099.32	1182.93	682.807	208.96	446.746	379.522	-1.5571	-0.10575	1.7083	0.23527	0.63621	0.91702	0.0007299	1	conserved hypothetical protein
38	CADAFLAG00004674	AFLA_109400	6.02623	52.6832	124.145	221.531	77.109	15.9462	83.6809	84.7462	-3.128	-0.83548	2.2737	-0.018251	1	0.053572	0.52806	1	extracellular protein, putative
38	CADAFLAG00004675	AFLA_109410	50.5893	82.1152	246.577	375.006	153.159	132.985	141.649	132.84	-0.69882	-0.60487	0.20377	0.092622	1	0.084321	1	1	UV-endonuclease UVE-1
38	CADAFLAG00004676	AFLA_109420	43.5949	78.1613	252.911	314.745	157.092	114.807	118.875	127.331	-0.84229	-0.31556	0.4524	-0.099135	1	0.61071	1	1	actin cytoskeleton organization protein App1, putative
38	CADAFLAG00004677	AFLA_109430	79.7049	110.596	614.972	535.877	381.99	209.455	202.351	179.976	-0.47255	0.19862	0.8669	0.16905	1	0.98428	0.4824	1	nonribosomal siderophore peptide synthase SidC
39	CADAFLAG00005015	AFLA_112810	7.19877	14.8529	86.8433	41.7106	53.9402	19.0034	15.7469	23.8669	-1.0449	1.058	1.5051	-0.59994	1	0.21211	1	1	trytophan synthase alpha subunit, putative
39	CADAFLAG00005016	AFLA_112820	53.0161	33.9599	72.2906	185.592	44.9022	139.429	70.1168	55.1997	0.6426	-1.3603	-1.6347	0.3451	1	0.0020155	0.511	1	toxin biosynthesis ketoreductase nor1, putative
39	CADAFLAG00005017	AFLA_112830	8.33043	7.42646	53.9479	49.7043	33.5089	21.8956	18.7896	11.9335	0.16572	0.1182	0.6139	0.65492	1	1	1	1	conserved hypothetical protein
39	CADAFLAG00005018	AFLA_112840	0	1.45934	14.6082	12.5554	9.07363	0	4.74427	2.36055		0.21847		1.0071	1	1	1	1	polyketide synthase, putative
39	CADAFLAG00005019	AFLA_112850	0	0.827728	5.38766	0	3.3456	0	0	1.34266					1	0.86579	1	1	O-methyltransferase, putative
39	CADAFLAG00005020	AFLA_112860	1.21342	0.63161	2.65441	1.25792	1.64881	3.22225	0.474066	1.01789	0.94197	1.0774	-0.96664	-1.1024	1	1	1	1	conserved hypothetical protein
39	CADAFLAG00005021	AFLA_112870	2.34508	2.1342	18.1224	10.0396	11.2552	6.11445	3.79614	3.42201	0.13594	0.85207	0.8803	0.14969	1	0.93788	1	1	monooxygenase, putative
39	CADAFLAG00005022	AFLA_112880	0	0.63161	1.18391	1.25792	0.735606	0	0.474066	1.01789		-0.087479		-1.1024	1	1	1	1	2,4-dichlorophenol 6-monooxygenase, putative
39	CADAFLAG00005023	AFLA_112890	38.5777	48.5244	238.853	183.865	148.35	101.258	69.4481	78.1399	-0.33094	0.37748	0.55097	-0.17012	1	0.58559	1	1	MFS transporter, putative
40	CADAFLAG00013394	AFLA_114760	100.981	132.304	284.536	564.372	176.733	266.009	213.188	214.438	-0.38978	-0.98804	-0.5899	-0.0084361	1	8.437e-05	0.99582	1	chitin synthase B
40	CADAFLAG00013395	AFLA_114770	6.02623	5.64123	14.7246	20.1029	9.14685	15.9462	7.58867	9.11744	0.095244	-0.44918	-0.80187	-0.26478	1	1	1	1	hypothetical protein
40	CADAFLAG00013396	AFLA_114780	142.994	402.377	1369.25	2400.8	850.464	376.108	906.809	651.999	-1.4926	-0.81013	1.1771	0.47593	0.80329	1.6803e-07	0.063852	1	conserved hypothetical protein
40	CADAFLAG00013397	AFLA_114790	49.4985	70.8067	237.704	333.566	147.646	130.258	125.994	114.198	-0.5165	-0.48881	0.18077	0.14182	1	0.24545	1	1	myo-inositol-1(or 4)-monophosphatase
40	CADAFLAG00013398	AFLA_114800	7.19877	14.9625	41.353	67.8088	25.6849	19.0034	25.6176	24.1046	-1.0555	-0.71348	0.43466	0.08783	1	0.59565	1	1	hypothetical protein
40	CADAFLAG00013399	AFLA_114810	42.7838	54.607	211.348	166.031	131.273	112.37	62.712	88.4652	-0.35202	0.34817	0.22431	-0.49637	1	0.68279	1	1	cytochrome P450, putative
40	CADAFLAG00013400	AFLA_114820	11.848	19.6232	152.491	62.5778	94.7196	31.0673	23.6186	31.5981	-0.72791	1.285	1.6083	-0.41992	1	0.048368	0.41593	1	polyketide synthase, putative
41	CADAFLAG00012180	AFLA_116080	217.736	182.686	147.766	914.927	91.7811	573.907	345.514	298.012	0.25321	-2.6303	-2.6445	0.21337	1	7.3215e-23	0.020905	1	beta-glucosidase precursor, putative
41	CADAFLAG00012181	AFLA_116090	43.6767	35.5721	44.7095	148.937	27.7705	115.137	56.2625	57.8414	0.29611	-1.7361	-2.0517	-0.039928	1	0.00033536	0.22458	1	sugar transporter, putative
41	CADAFLAG00012182	AFLA_116100	2.95179	2.28707	6.26704	13.3197	3.89322	7.72557	5.02727	3.70321	0.36809	-1.0877	-0.98868	0.441	1	0.86335	1	1	MFS multidrug transporter, putative
41	CADAFLAG00012183	AFLA_116110	5.37863	4.53088	17.0244	28.6378	10.574	14.1701	10.8152	7.36286	0.24745	-0.75031	-0.42232	0.55472	1	0.83473	1	1	C6 transcription factor, putative
41	CADAFLAG00012184	AFLA_116120	11.3231	9.5636	62.1369	88.4291	38.5953	29.7862	33.3938	15.6129	0.24364	-0.50907	0.37378	1.0968	1	0.68223	1	1	conserved hypothetical protein
41	CADAFLAG00012185	AFLA_116130	1.21342	12.7187	106.028	53.0081	65.8558	3.22225	20.0172	20.4449	-3.3898	1.0002	4.3532	-0.030506	1	0.16031	0.081615	1	conserved hypothetical protein
41	CADAFLAG00012186	AFLA_116140	0	1.93809	9.13462	12.5554	5.67362	0	4.74427	3.09724		-0.45889		0.6152	1	1	1	1	putative secreted protein
41	CADAFLAG00012187	AFLA_116150	0	0.196118	0.720023	0	0.447201	0	0	0.324773					1	1	1	1	integral membrane protein
41	CADAFLAG00012188	AFLA_116160	0	0.196118	0.360012	0	0.223601	0	0	0.324773					1	1	1	1	zinc-binding dehydrogenase family oxidoreductase
41	CADAFLAG00012189	AFLA_116170	0	4.7039	45.9956	67.8325	28.5665	0	25.614	7.53714		-0.56048		1.7648	1	0.69183	0.3863	0.48615	hypothetical protein
41	CADAFLAG00012190	AFLA_116180	0	1.02385	5.95542	13.0728	3.69881	0	4.93173	1.66744		-1.1343		1.5645	1	0.88977	1	1	hypothetical protein
41	CADAFLAG00012191	AFLA_116190	1.17254	21.7112	206.174	227.621	128.059	3.05722	85.9485	34.7192	-4.2107	-0.14277	5.3884	1.3077	1	0.99119	4.8701e-05	1	conserved hypothetical protein
41	CADAFLAG00012192	AFLA_116200	0	0.392236	2.22098	0	1.3792	0	0	0.649546					1	1	1	1	conserved hypothetical protein
41	CADAFLAG00012193	AFLA_116210	1.21342	2.72256	10.8433	16.3292	6.73522	3.22225	6.16647	4.39633	-1.1659	-0.59065	1.0637	0.48815	1	1	1	1	O-methyltransferase, putative
41	CADAFLAG00012194	AFLA_116220	0	1.30648	2.09917	0	1.30401	0	0	2.07935					1	1	1	1	polyketide synthase, putative
41	CADAFLAG00012195	AFLA_116230	0	0	0	0	0	0	0	0									conserved hypothetical protein
41	CADAFLAG00012196	AFLA_116240	9.4212	7.75528	40.7852	19.5855	25.3317	24.6228	7.40121	12.6464	0.28073	1.0583	0.040947	-0.77289	1	0.5117	1	1	hypothetical protein
41	CADAFLAG00012197	AFLA_116250	12.4956	13.2033	17.5797	37.4432	10.9188	32.8434	14.1337	21.6965	-0.079477	-1.0908	-1.5888	-0.61832	1	0.44629	1	1	conserved hypothetical protein
41	CADAFLAG00012198	AFLA_116260	1.21342	1.0671	1.63528	2.76267	1.0156	3.22225	1.04367	1.71101	0.18538	-0.75653	-1.6657	-0.71318	1	1	1	1	N-hydroxyarylamine O-acetyltransferase, putative
41	CADAFLAG00012199	AFLA_116270	50.5893	49.4041	323.192	171.827	200.742	132.985	64.8913	80.2983	0.034199	0.91144	0.59408	-0.30735	1	0.0061553	1	1	paraoxonase, putative
41	CADAFLAG00012200	AFLA_116280	19.6535	16.9699	65.5651	87.6411	40.7225	51.6819	33.1144	27.6533	0.21181	-0.41868	-0.34383	0.26001	1	0.87451	1	1	dihydroxy-acid dehydratase, putative
41	CADAFLAG00012201	AFLA_116290	1.21342	0	3.37443	8.288	2.09601	3.22225	3.131	0		-1.2964	-0.62042		1	0.95283	1	1	conserved hypothetical protein
41	CADAFLAG00012202	AFLA_116300	0	0	0.750476	0	0.465999	0	0	0						1	1		short-chain dehydrogenase, putative
41	CADAFLAG00012203	AFLA_116310	0	0	0	0	0	0	0	0									short-chain dehydrogenase, putative
41	CADAFLAG00012204	AFLA_116320	0	0.392236	8.53099	5.2785	5.29963	0	1.9918	0.649546		0.69258		1.6166	1	1	1	1	hypothetical protein
41	CADAFLAG00012205	AFLA_116330	0.606711	1.0671	9.03075	6.78325	5.60881	1.61112	2.5614	1.71101	-0.81462	0.41287	1.7996	0.58209	1	1	1	1	O-methyltransferase, putative
42	CADAFLAG00012217	AFLA_116450	0	0.63161	0.720023	4.02059	0.447201	0	1.51773	1.01789		-2.4813		0.57634	1	0.90986	1	1	conserved hypothetical protein
42	CADAFLAG00012218	AFLA_116460	29.2383	28.2263	171.355	158.037	106.43	76.9648	59.6693	45.4803	0.050816	0.11672	0.46763	0.39175	1	1	1	1	conserved hypothetical protein
42	CADAFLAG00012219	AFLA_116470	0	0.63161	1.44005	0	0.894402	0	0	1.01789					1	1	1	1	conserved hypothetical protein
42	CADAFLAG00012220	AFLA_116480	1.17254	0	0.720023	0	0.447201	3.05722	0	0			-2.7732		1	1	1		dihydroflavonal-4-reductase, putative
42	CADAFLAG00012221	AFLA_116490	0	0	1.24481	0	0.773203	0	0	0						1	1		conserved hypothetical protein
42	CADAFLAG00012222	AFLA_116500	0	0	0.689571	0	0.428403	0	0	0						1	1		PKS-like enzyme, putative
42	CADAFLAG00012223	AFLA_116510	23.1711	11.5651	23.1697	82.1395	14.3921	60.8535	31.0234	18.6468	1.0026	-1.8258	-2.0801	0.73443	1	0.0079459	0.85043	1	conserved hypothetical protein
42	CADAFLAG00012224	AFLA_116520	10.1097	4.53088	6.62705	15.5649	4.11682	26.564	5.88348	7.36286	1.1579	-1.2319	-2.6899	-0.3236	1	0.84092	1	1	gibberellin 2-beta-dioxygenase, putative
42	CADAFLAG00012225	AFLA_116530	1.77925	0.392236	1.01913	2.76267	0.633205	4.66835	1.04367	0.649546	2.1815	-1.4387	-2.8822	0.68416	1	1	1	1	cytochrome P450 alkane hydroxylase, putative
42	CADAFLAG00012226	AFLA_116540	0.606711	0	0.195232	0	0.121199	1.61112	0	0			-3.7326		1	1	1		conserved hypothetical protein
42	CADAFLAG00012227	AFLA_116550	45.2924	12.5054	21.2102	41.6868	13.1736	119.145	15.7506	20.4845	1.8567	-0.97483	-3.177	-0.37913	1	0.56875	0.050387	1	conserved hypothetical protein
42	CADAFLAG00012228	AFLA_116560	20.7443	7.71202	27.5991	25.3577	17.142	54.409	9.58408	12.6028	1.4275	0.1222	-1.6663	-0.39503	1	1	1	1	NmrA-like family protein
42	CADAFLAG00012229	AFLA_116570	4.73104	0.827728	2.84964	1.50475	1.77001	12.3939	0.569601	1.34266	2.5149	0.92126	-2.8078	-1.2371	1	1	1	1	DUF636 domain protein
42	CADAFLAG00012230	AFLA_116580	0	0	0	0	0	0	0	0									male sterility domain containing protein, putative
42	CADAFLAG00012231	AFLA_116590	35.7077	20.1712	57.6824	86.6538	35.8285	93.862	32.7322	32.7863	0.82394	-0.58713	-1.3894	-0.0023814	1	0.63064	0.92783	1	CRAL/TRIO domain protein
42	CADAFLAG00012232	AFLA_116600	14.9634	6.38245	39.6693	44.4733	24.6401	39.453	16.7906	10.373	1.2293	-0.16492	-0.67913	0.69483	1	1	1	1	dimethylallyl tryptophan synthase, putative
43	CADAFLAG00012254	AFLA_116820	0.606711	0.196118	3.46579	1.25792	2.1524	1.61112	0.474066	0.324773	1.6293	1.4621	0.41788	0.54566	1	1	1	1	hypothetical protein
43	CADAFLAG00012255	AFLA_116830	2.34508	1.02385	6.64499	5.52533	4.12721	6.11445	2.08734	1.66744	1.1956	0.26621	-0.56705	0.32403	1	1	1	1	hypothetical protein
43	CADAFLAG00012256	AFLA_116840	1.21342	0.63161	2.97145	4.26742	1.8452	3.22225	1.61327	1.01789	0.94197	-0.5222	-0.80429	0.66441	1	1	1	1	salicylate 1-monooxygenase SalA
43	CADAFLAG00012257	AFLA_116850	1.17254	0.870983	2.65441	5.77217	1.64881	3.05722	2.18287	1.38623	0.42892	-1.1207	-0.8908	0.65506	1	1	1	1	Ankyrin domain protein
43	CADAFLAG00012258	AFLA_116860	0.606711	0.196118	6.41931	9.29909	3.98721	1.61112	3.50954	0.324773	1.6293	-0.53467	1.3073	3.4338	1	1	1	1	alpha-N-acetylglucosaminidase, putative
43	CADAFLAG00012259	AFLA_116870	0	2.72256	8.31072	10.0396	5.16161	0	3.79614	4.39633		-0.27265		-0.21177	1	1	1	1	transferase family protein
43	CADAFLAG00012260	AFLA_116880	1.17254	0.196118	1.86096	1.50475	1.1556	3.05722	0.569601	0.324773	2.5798	0.30653	-1.4036	0.81052	1	1	1	1	C6 transcription factor, putative
43	CADAFLAG00012261	AFLA_116890	7.23965	5.31535	15.7492	20.1029	9.78203	19.1685	7.58867	8.66195	0.44575	-0.35213	-0.97053	-0.19084	1	1	1	1	polyketide synthase, putative
43	CADAFLAG00012262	AFLA_116900	0	0	0	0	0	0	0	0									conserved hypothetical protein
43	CADAFLAG00012263	AFLA_116910	0	0	0	0	0	0	0	0									hypothetical protein
43	CADAFLAG00012264	AFLA_116920	20.9896	21.4143	88.4427	88.6522	54.935	55.3992	33.4929	34.929	-0.028898	-0.0034124	-0.012139	-0.06057	1	1	1	1	short-chain dehydrogenase, putative
44	CADAFLAG00012408	AFLA_118360	11.9298	4.92311	16.0053	32.3878	9.94083	31.3973	12.241	8.01241	1.2769	-1.0169	-1.6592	0.61142	1	0.68314	1	1	conserved hypothetical protein
44	CADAFLAG00012409	AFLA_118370	105.793	74.0227	293.621	219.286	182.373	278.733	82.8247	120.618	0.51521	0.42114	-0.61199	-0.54231	1	0.40936	0.93675	1	conserved hypothetical protein
44	CADAFLAG00012410	AFLA_118380	44.563	25.6394	54.8328	66.304	34.0585	117.039	25.048	41.7295	0.79748	-0.27406	-1.7809	-0.73637	1	1	0.65975	1	conserved hypothetical protein
44	CADAFLAG00012411	AFLA_118390	130.989	80.8465	275.001	225.998	170.802	345.245	85.3969	132.199	0.69619	0.28313	-1.0153	-0.63045	1	0.88574	0.39807	1	NCS family nucleoside transporter, putative
44	CADAFLAG00012412	AFLA_118400	10.1914	9.21462	31.6935	24.6172	19.6853	26.894	9.29748	15.0069	0.14536	0.36452	-0.45017	-0.69072	1	1	1	1	hypothetical protein
44	CADAFLAG00012413	AFLA_118410	123.102	76.7049	169.231	164.032	105.109	324.3	61.9513	125.228	0.68246	0.045011	-1.6254	-1.0153	1	1	0.081699	1	conserved hypothetical protein
44	CADAFLAG00012414	AFLA_118420	14.2749	8.55991	99.5172	23.1124	61.8122	37.5118	8.72787	13.8385	0.73781	2.1063	0.72055	-0.66499	1	0.0010757	1	1	hypothetical protein
44	CADAFLAG00012415	AFLA_118430	0	0	0.16478	0	0.102401	0	0	0						1	1		conserved hypothetical protein
44	CADAFLAG00012416	AFLA_118440	0	0.392236	0.884803	1.25792	0.549602	0	0.474066	0.649546		-0.50761		-0.45434	1	1	1	1	NRPS-like enzyme, putative
44	CADAFLAG00012417	AFLA_118450	116.551	50.0013	149.15	371.726	92.6399	307.073	140.417	82.0449	1.2209	-1.3175	-1.7289	0.77524	1	1.0374e-05	0.06368	1	conserved hypothetical protein
44	CADAFLAG00012418	AFLA_118460	185.765	77.8266	378.322	223.33	234.982	486.75	84.3388	126.103	1.2551	0.76044	-1.0506	-0.58034	1	0.017666	1	1	amino acid transporter, putative
45	CADAFLAG00012454	AFLA_118820	2.95179	5.55472	23.236	30.883	14.4316	7.72557	11.6714	9.0303	-0.91212	-0.41045	0.90152	0.37013	1	1	1	1	short-chain dehydrogenase, putative
45	CADAFLAG00012455	AFLA_118830	14.3158	19.7991	73.7361	57.0049	45.7985	37.6768	21.5385	32.0298	-0.46783	0.37128	0.28162	-0.5725	1	0.91693	1	1	conserved hypothetical protein
45	CADAFLAG00012456	AFLA_118840	4.12433	33.3859	10.9651	30.1425	6.81042	10.7828	11.3848	53.6036	-3.017	-1.4589	-0.66292	-2.2352	1	0.37041	1	1	pantothenate transporter, putative
45	CADAFLAG00012457	AFLA_118850	47.5083	145.867	48.5586	152.735	30.1589	123.9	57.6811	233.952	-1.6184	-1.6532	-2.0385	-2.02	1	0.00034937	1	1	2,4-dihydroxyhept-2-ene-1,7-dioic acid aldolase, putative
45	CADAFLAG00012458	AFLA_118860	0	0	0	0	0	0	0	0									hypothetical protein
45	CADAFLAG00012459	AFLA_118870	54.3457	196.177	98.43	271.211	61.135	142.282	102.474	314.908	-1.8519	-1.4622	-1.2187	-1.6197	1	0.029543	1	1	translation initiation inhibitor, putative
45	CADAFLAG00012460	AFLA_118880	35.3397	173.098	31.7311	183.888	19.7105	92.3768	69.4445	278.43	-2.2922	-2.5349	-2.2286	-2.0034	1	2.7566e-09	1	1	gibberellin 3-beta hydroxylase, putative
45	CADAFLAG00012461	AFLA_118890	59.0423	86.2882	593.77	429.789	368.8	155.376	162.327	138.825	-0.54741	0.46627	1.2471	0.22564	1	0.11385	0.21353	1	eukaryotic translation initiation factor eIF-5A-2
45	CADAFLAG00012462	AFLA_118900	70.8086	52.9977	350.406	237.366	217.643	186.113	89.6563	86.0809	0.418	0.56191	0.22579	0.058712	1	0.12557	1	1	conserved hypothetical protein
45	CADAFLAG00012463	AFLA_118910	6.46941	1.69871	22.9798	4.26742	14.2728	16.8972	1.61327	2.7289	1.9292	2.4289	-0.24352	-0.75833	1	0.24176	1	1	conserved hypothetical protein
45	CADAFLAG00012464	AFLA_118920	0	0	0	0	0	0	0	0									hypothetical protein
45	CADAFLAG00012465	AFLA_118930	0	0	0	0	0	0	0	0									hypothetical protein
45	CADAFLAG00012466	AFLA_118940	2.34508	0.435492	1.57437	2.76267	0.978005	6.11445	1.04367	0.693116	2.4289	-0.81128	-2.6443	0.59049	1	1	1	1	polyketide synthase, putative
45	CADAFLAG00012467	AFLA_118950	0	0	0.360012	0	0.223601	0	0	0						1	1		conserved hypothetical protein
45	CADAFLAG00012468	AFLA_118960	10.0279	2.28707	16.1467	11.2975	10.0309	26.2339	4.27021	3.70321	2.1325	0.51524	-1.387	0.20553	1	1	1	1	polyketide synthase, putative
45	CADAFLAG00012469	AFLA_118970	2.34508	2.33032	16.3474	4.51425	10.154	6.11445	1.7088	3.74678	0.0091088	1.8565	0.73176	-1.1327	1	0.5622	1	1	MAK1-like monooxygenase, putative
45	CADAFLAG00012470	AFLA_118980	4.73104	5.68449	52.1408	27.1092	32.3845	12.3939	10.2492	9.16101	-0.26487	0.94363	1.3857	0.16194	1	0.44824	1	1	mitochondrial carrier protein Leu5
45	CADAFLAG00012471	AFLA_118990	8.81449	4.50778	131.846	13.5665	81.8947	23.0117	5.1228	7.21237	0.96746	3.2807	1.8314	-0.49354	1	3.3104e-08	0.23628	1	efflux pump antibiotic resistance protein, putative
45	CADAFLAG00012472	AFLA_119000	12.8979	2.17746	0.360012	0	0.223601	33.6295	0	3.46558	2.5664		-7.2327		1	1	1	1	O-methyltransferase, putative
46	CADAFLAG00012481	AFLA_119090	0	0	0.390464	0	0.242399	0	0	0						1	1		oxidoreductase, short chain dehydrogenase/reductase family, putative
46	CADAFLAG00012482	AFLA_119100	0	0	0	0	0	0	0	0									hypothetical protein
46	CADAFLAG00012483	AFLA_119110	0.606711	0.63161	1.27527	2.76267	0.792001	1.61112	1.04367	1.01789	-0.058025	-1.1153	-1.0245	0.036082	1	1	1	1	NRPS-like enzyme, putative
46	CADAFLAG00012484	AFLA_119120	95.9634	120.56	525.592	579.538	326.451	252.46	218.866	197.011	-0.3292	-0.14096	0.37081	0.15177	1	0.89972	1	1	beta-lactamase family protein
46	CADAFLAG00012485	AFLA_119130	4.16521	7.68893	33.6943	35.6441	20.9264	10.9478	13.4758	12.4523	-0.88439	-0.08116	0.93468	0.11395	1	1	1	1	conserved hypothetical protein
46	CADAFLAG00012486	AFLA_119140	5.29687	31.1219	10.2881	29.6488	6.39042	13.84	11.1937	50.0509	-2.5547	-1.527	-1.1149	-2.1607	1	0.32373	1	1	short-chain dehydrogenases/reductase, putative
47	CADAFLAG00012719	AFLA_121470	19.2103	33.5648	116.95	111.518	72.639	50.7308	42.1252	54.2927	-0.80507	0.068618	0.51788	-0.36607	1	1	1	1	hscarg dehydrogenase, putative
47	CADAFLAG00012720	AFLA_121480	0.606711	13.5464	6.38885	17.3403	3.96842	1.61112	6.545	21.7876	-4.4808	-1.4405	1.3005	-1.735	1	0.60084	1	1	phytanoyl-CoA dioxygenase family protein
47	CADAFLAG00012721	AFLA_121490	25.073	34.6491	45.5638	104.758	28.3013	66.0169	39.5602	55.6394	-0.46668	-1.2011	-1.222	-0.49205	1	0.052686	1	1	NmrA-like family protein
47	CADAFLAG00012722	AFLA_121500	6.55117	13.5897	26.6659	43.9796	16.5633	17.2273	16.5995	21.8312	-1.0527	-0.72184	-0.056709	-0.39525	1	0.77686	1	1	cytochrome P450, putative
47	CADAFLAG00012723	AFLA_121510	17.8743	20.8431	39.467	51.2328	24.5125	47.0135	19.3556	33.5904	-0.22169	-0.37642	-0.93956	-0.79529	1	0.99665	1	1	conserved hypothetical protein
47	CADAFLAG00012724	AFLA_121520	1.82013	10.4749	13.3509	22.3482	8.29202	4.83337	8.44488	16.7853	-2.5248	-0.74322	0.77869	-0.99105	1	0.93659	1	1	NRPS-like enzyme, putative
47	CADAFLAG00012725	AFLA_121530	5.98534	20.6672	24.4199	31.4004	15.1672	15.7812	11.8589	33.1587	-1.7878	-0.36273	-0.057247	-1.4834	1	1	1	1	NADH-dependent flavin oxidoreductase, putative
47	CADAFLAG00012726	AFLA_121540	1.21342	5.249	4.45447	4.26742	2.76681	3.22225	1.61327	8.46789	-2.113	0.06189	-0.21984	-2.392	1	1	1	1	MFS multidrug transporter, putative
48	CADAFLAG00009755	AFLA_126970	35.2645	33.7407	127.286	48.7169	79.0586	92.911	18.4075	54.7244	0.063724	1.3856	-0.23293	-1.5719	1	0.0099793	1	0.48615	arginine permease, putative
48	CADAFLAG00009756	AFLA_126980	13.6682	10.8037	76.5248	31.6473	47.5309	35.9007	11.9544	17.4982	0.33929	1.2738	0.40486	-0.54966	1	0.12109	1	1	conserved hypothetical protein
48	CADAFLAG00009757	AFLA_126990	0	0	0	0	0	0	0	0									conserved hypothetical protein
48	CADAFLAG00009758	AFLA_127000	0	0.196118	0	0	0	0	0	0.324773					1			1	hypothetical protein
48	CADAFLAG00009759	AFLA_127010	87.3747	0.196118	0.329559	0	0.204802	227.846	0	0.324773	8.7993		-10.12		1	1	0.90821	1	conserved hypothetical protein
48	CADAFLAG00009760	AFLA_127020	11.7254	0	0	1.25792	0	30.5722	0.474066	0					1	1	1	1	monooxygenase, putative
48	CADAFLAG00009761	AFLA_127030	1.77925	0.63161	3.43534	4.26742	2.1336	4.66835	1.61327	1.01789	1.4942	-0.31291	-1.1296	0.66441	1	1	1	1	conserved hypothetical protein
48	CADAFLAG00009762	AFLA_127040	50.4192	0	1.40959	2.76267	0.875604	131.461	1.04367	0		-0.97078	-7.2301		1	1	1	1	MFS monocarboxylate transporter, putative
48	CADAFLAG00009763	AFLA_127050	4.69016	0	0	0	0	12.2289	0	0					1		1		conserved hypothetical protein
48	CADAFLAG00009764	AFLA_127060	2.34508	0	0	0	0	6.11445	0	0					1		1		conserved hypothetical protein
48	CADAFLAG00009765	AFLA_127070	5.8627	0.435492	0	0	0	15.2861	0	0.693116	3.7508				1		1	1	short-chain dehydrogenase, putative
48	CADAFLAG00009766	AFLA_127080	10.5529	1.30648	0	0	0	27.515	0	2.07935	3.0139				1		1	1	conserved hypothetical protein
48	CADAFLAG00009767	AFLA_127090	18.2357	1.65546	2.06871	10.557	1.28521	47.6345	3.9836	2.68533	3.4615	-2.3514	-5.2119	0.56898	1	0.50365	1	1	polyketide synthase, putative
48	CADAFLAG00009768	AFLA_127100	14.0705	4.26841	5.72973	9.79275	3.55881	36.6867	3.70061	6.84402	1.7209	-0.77325	-3.3658	-0.88708	1	1	1	1	conserved hypothetical protein
48	CADAFLAG00009769	AFLA_127110	115.699	151.494	724.06	575.423	449.727	304.472	217.362	245.6	-0.38889	0.33149	0.56274	-0.17621	1	0.27511	1	1	MFS transporter, putative
49	CADAFLAG00009855	AFLA_127970	157.923	186.308	1159.53	902.524	720.219	416.26	340.879	302.551	-0.23847	0.3615	0.79095	0.17208	1	0.12483	0.77899	1	ubiquitin-protein ligase E3 component (UBR1), putative
49	CADAFLAG00009856	AFLA_127980	375.291	272.392	812.277	984.711	504.511	988.682	371.895	444.096	0.46232	-0.27773	-0.97062	-0.25598	1	0.33151	0.18862	1	conserved hypothetical protein
49	CADAFLAG00009857	AFLA_127990	25.598	21.0653	107.316	116.303	66.6562	67.298	43.926	34.323	0.28116	-0.11602	-0.013825	0.3559	1	1	1	1	RNA binding protein Pym, putative
49	CADAFLAG00009858	AFLA_128000	108.057	82.6489	254.831	304.753	158.28	284.517	115.072	134.65	0.38672	-0.2581	-0.84603	-0.22668	1	0.75636	0.72874	1	protoporphyrinogen oxidase, putative
49	CADAFLAG00009859	AFLA_128010	130.458	133.261	522.898	607.683	324.784	343.1	229.49	215.911	-0.030676	-0.21679	-0.079146	0.087991	1	0.64967	1	1	nuclear polyadenylated RNA-binding protein Nab2, putative
49	CADAFLAG00009860	AFLA_128020	10.2323	8.36379	40.3159	27.6267	25.0413	27.059	10.4367	13.5138	0.2909	0.54529	-0.1118	-0.37277	1	0.92631	1	1	conserved hypothetical protein
49	CADAFLAG00009861	AFLA_128030	0	1.89483	1.14094	11.0507	0.708398	0	4.17467	3.05367		-3.2758		0.45112	1	0.27019	1	1	hypothetical protein
49	CADAFLAG00009862	AFLA_128040	0	1.69871	0.360012	0	0.223601	0	0	2.7289					1	1	1	1	efflux pump antibiotic resistance protein, putative
49	CADAFLAG00009863	AFLA_128050	4.8128	5.68449	15.1205	16.3292	9.39122	12.724	6.16647	9.16101	-0.24015	-0.11095	-0.43816	-0.57106	1	1	1	1	conserved hypothetical protein
49	CADAFLAG00009864	AFLA_128060	4.16521	12.3697	25.457	45.978	15.8108	10.9478	17.3602	19.839	-1.5704	-0.85288	0.53027	-0.19255	1	0.55214	1	1	polyketide synthase, putative
49	CADAFLAG00009865	AFLA_128070	305.5	350.063	1748.22	3596.27	1085.85	800.81	1358.43	567.752	-0.19644	-1.0406	0.43929	1.2586	1	3.3545e-13	1	0.20537	conserved hypothetical protein
49	CADAFLAG00009866	AFLA_128080	274.53	306.366	1525.81	3174.3	947.706	720.206	1199.04	496.765	-0.15829	-1.0569	0.39603	1.2712	1	4.7375e-13	1	0.19214	conserved hypothetical protein
49	CADAFLAG00009867	AFLA_128090	22.1621	48.6571	357.774	217.51	222.215	58.4564	82.1632	78.528	-1.1346	0.71797	1.9265	0.065285	1	0.026749	0.085184	1	cytochrome P450 alkane hydroxylase, putative
50	CADAFLAG00009873	AFLA_128150	26.8523	34.828	114.675	88.6997	71.2286	70.6853	33.4857	56.3285	-0.3752	0.37055	0.011048	-0.75032	1	0.9048	1	1	C6 transcription factor, putative
50	CADAFLAG00009874	AFLA_128160	45.8173	65.8491	293.275	269.579	182.162	120.426	101.791	106.914	-0.52327	0.12155	0.59708	-0.070841	1	1	1	1	C6 transcription factor, putative
50	CADAFLAG00009875	AFLA_128170	21.876	21.9363	110.434	79.13	68.5934	57.3012	29.8842	35.7093	-0.0039712	0.48089	0.2595	-0.25691	1	0.70785	1	1	NRPS-like enzyme, putative
51	CADAFLAG00010048	AFLA_129900	110.559	134.856	576.79	642.785	358.258	290.428	242.782	218.917	-0.28661	-0.15629	0.30282	0.14927	1	0.88203	1	1	siderochrome-iron transporter MirC
51	CADAFLAG00010049	AFLA_129910	158.523	130.634	598.346	479.836	371.642	417.007	181.198	212.374	0.27916	0.31844	-0.16616	-0.22904	1	0.4492	1	1	Rho GTPase ModA, putative
51	CADAFLAG00010050	AFLA_129920	46.1444	24.7655	121.003	177.869	75.1595	121.746	67.1661	40.0858	0.89782	-0.55577	-0.69585	0.74464	1	0.32776	1	1	agmatinase, putative
51	CADAFLAG00010051	AFLA_129930	33.9693	24.6357	91.219	134.853	56.659	89.3587	50.9523	39.9551	0.46348	-0.56398	-0.6573	0.35077	1	0.53846	1	1	3-oxoacyl carrier protein synthase, putative
51	CADAFLAG00010052	AFLA_129940	39.9955	54.3877	314.129	246.371	195.11	105.305	93.0775	87.99	-0.44344	0.35052	0.88971	0.081094	1	0.48923	0.95331	1	SAGA complex component (Sgf73), putative
51	CADAFLAG00010053	AFLA_129950	31.181	35.7653	140.521	142.671	87.2774	82.2932	53.8886	57.9088	-0.19789	-0.021911	0.084836	-0.1038	1	1	1	1	mRNA capping enzyme alpha subunit, putative
51	CADAFLAG00010054	AFLA_129960	216.808	192.01	672.847	627.221	417.908	571.84	236.898	313.256	0.17524	0.10131	-0.45243	-0.40308	1	1	1	1	oligosaccharyl transferase subunit (alpha), putative
51	CADAFLAG00010055	AFLA_129970	76.4734	75.0406	372.805	310.254	231.555	201.438	117.163	121.77	0.027287	0.26497	0.20102	-0.055647	1	0.74981	1	1	IdgA domain protein
52	CADAFLAG00007418	AFLA_135400	24.5072	68.8744	310.536	342.348	192.88	64.5708	129.316	111.615	-1.4908	-0.1407	1.5788	0.21236	1	1	0.2825	1	FAD dependent oxidoreductase, putative
52	CADAFLAG00007419	AFLA_135410	0	0.196118	2.61144	0	1.6216	0	0	0.324773					1	1	1	1	conserved hypothetical protein
52	CADAFLAG00007420	AFLA_135420	0	0	0.195232	0	0.121199	0	0	0						1	1		NmrA-like family protein
52	CADAFLAG00007421	AFLA_135430	0	0	0.195232	0	0.121199	0	0	0						1	1		cytochrome P450, putative
52	CADAFLAG00007422	AFLA_135440	0	0.196118	0	0	0	0	0	0.324773					1			1	cytochrome P450, putative
52	CADAFLAG00007423	AFLA_135450	0	0	0	0	0	0	0	0									trichodiene synthase, putative
52	CADAFLAG00007424	AFLA_135460	0	0.435492	1.83051	1.50475	1.1368	0	0.569601	0.693116		0.28272		-0.28314	1	1	1	1	conserved hypothetical protein
52	CADAFLAG00007425	AFLA_135470	0.606711	0	0.750476	0	0.465999	1.61112	0	0			-1.7897		1	1	1		ornithine decarboxylase, putative
52	CADAFLAG00007426	AFLA_135480	2.95179	0.980591	3.1792	6.53642	1.97481	7.72557	2.46587	1.62387	1.5899	-1.0398	-1.9679	0.60266	1	1	1	1	galactose-proton symport, putative
52	CADAFLAG00007427	AFLA_135490	0.606711	0.870983	2.95352	2.51584	1.83481	1.61112	0.948133	1.38623	-0.52164	0.2314	0.18756	-0.54801	1	1	1	1	nonribosomal peptide synthase, putative
53	CADAFLAG00007655	AFLA_137780	4.8128	4.37801	20.4293	12.0618	12.6888	12.724	4.5532	7.08166	0.1366	0.7602	-0.0039881	-0.63721	1	1	1	1	ABC transporter, putative
53	CADAFLAG00007656	AFLA_137790	0	0	0.16478	0	0.102401	0	0	0						1	1		cell wall protein, putative
53	CADAFLAG00007657	AFLA_137800	0	0.588354	6.28498	7.52375	3.90361	0	2.84801	0.97432		-0.25954		1.5475	1	1	1	1	conserved hypothetical protein
53	CADAFLAG00007658	AFLA_137810	0	1.21996	8.67073	6.53642	5.38521	0	2.46587	1.99221		0.40765		0.30773	1	1	1	1	pantothenate transporter, putative
53	CADAFLAG00007659	AFLA_137820	6.55117	8.9954	33.8966	47.459	21.0541	17.2273	17.9334	14.5317	-0.45743	-0.48554	0.2894	0.30345	1	0.9514	1	1	conserved hypothetical protein
53	CADAFLAG00007660	AFLA_137830	8.28954	15.1817	82.2779	61.2723	51.1021	21.7306	23.1518	24.5798	-0.87297	0.42527	1.2337	-0.086353	1	0.8325	1	1	hypothetical protein
53	CADAFLAG00007661	AFLA_137840	54.918	53.5831	238.238	200.464	147.972	144.593	75.7065	86.7978	0.035501	0.24906	0.033325	-0.19724	1	0.88824	1	1	integral membrane protein
53	CADAFLAG00007662	AFLA_137850	24.3437	45.8509	284.291	223.553	176.578	63.9107	84.438	74.3019	-0.9134	0.34675	1.4662	0.18449	1	0.58376	0.2254	1	conserved hypothetical protein
53	CADAFLAG00007663	AFLA_137860	176.643	216.464	964.156	724.583	598.845	465.011	273.724	352.265	-0.29329	0.41211	0.36492	-0.36394	1	0.069647	1	1	conserved hypothetical protein
53	CADAFLAG00007664	AFLA_137870	21.3101	23.7215	119.946	92.6728	74.501	55.8551	35.0106	38.5253	-0.15465	0.37217	0.41557	-0.13801	1	0.8014	1	1	polyketide synthase, putative
53	CADAFLAG00007665	AFLA_137880	1.17254	0.435492	3.20965	1.50475	1.99361	3.05722	0.569601	0.693116	1.4289	1.0929	-0.61684	-0.28314	1	1	1	1	extracellular triacylglycerol lipase, putative
53	CADAFLAG00007666	AFLA_137890	3.5585	0.980591	7.8898	4.02059	4.90041	9.33669	1.51773	1.62387	1.8595	0.97258	-0.93001	-0.097513	1	1	1	1	conserved hypothetical protein
53	CADAFLAG00007667	AFLA_137900	0	0	0	0	0	0	0	0									hypothetical protein
53	CADAFLAG00007668	AFLA_137910	0	0	0.915256	1.25792	0.568401	0	0.474066	0		-0.45879				1	1	1	conserved hypothetical protein
53	CADAFLAG00007669	AFLA_137920	8.41219	20.7394	16.0483	4.02059	9.96803	22.2257	1.51773	33.8676	-1.3018	1.9969	-1.1568	-4.4799	1	0.60864	1	0.022901	MFS siderophore iron transporter, putative
54	CADAFLAG00007791	AFLA_139150	656.862	850.561	5214.14	6108.78	3238.56	1728.1	2307.47	1376.35	-0.37282	-0.22846	0.90617	0.74547	1	0.26136	0.13532	1	aflY/ hypA/ hypP/ hypothetical protein
54	CADAFLAG00007792	AFLA_139160	274.951	332.464	1913.03	2618.48	1188.22	723.585	989.078	539.338	-0.27402	-0.45287	0.71557	0.87489	1	0.0078702	0.57284	1	aflX/ ordB/ monooxygenase/ oxidase
54	CADAFLAG00007793	AFLA_139170	1013.75	1090.96	7637.43	8361.47	4743.77	2667.62	3158.29	1767.1	-0.1059	-0.13067	0.83048	0.83776	1	0.70496	0.22379	1	aflW/ moxY/ monooxygenase
54	CADAFLAG00007794	AFLA_139180	795.343	999.8	6753.76	6563.85	4194.87	2094.36	2478.99	1619.17	-0.33006	0.041148	1.0021	0.6145	1	1	0.097857	1	aflV/ cypX/ cytochrome P450 monooxygenase
54	CADAFLAG00007795	AFLA_139190	1360.81	1556.75	10493.3	11225.8	6517.55	3581.73	4240.12	2522.29	-0.19407	-0.097357	0.86367	0.74937	1	0.86178	0.18862	1	aflK/ vbs/ VERB synthase
54	CADAFLAG00007796	AFLA_139200	232.284	257.432	1929.94	1652.07	1198.72	610.846	623.982	418.34	-0.1483	0.22429	0.97262	0.57683	1	0.39764	0.13689	1	aflQ/ ordA/ ord-1/ oxidoreductase/ cytochrome P450 monooxigenase
54	CADAFLAG00007797	AFLA_139210	700.907	779.859	6859.73	5649.43	4260.68	1844.72	2133.8	1267.6	-0.15399	0.28005	1.2077	0.75133	1	0.084843	0.011429	1	aflP/ omtA/ omt-1/ O-methyltransferase A
54	CADAFLAG00007798	AFLA_139220	17.3084	22.6313	133.047	135.641	82.6362	45.5674	51.2317	36.6638	-0.38684	-0.027864	0.85877	0.48268	1	1	1	1	aflO/ omtB/ dmtA/ O-methyltransferase B
54	CADAFLAG00007799	AFLA_139230	0	0	0	0	0	0	0	0									aflI/ avfA/ cytochrome P450 monooxygenase
54	CADAFLAG00007800	AFLA_139240	0	0	0	0	0	0	0	0									aflLa/ hypB/ hypothetical protein
54	CADAFLAG00007801	AFLA_139250	190.952	190.68	1304.37	1250.98	810.177	501.823	472.327	309.117	0.0020562	0.060302	0.69106	0.61163	1	1	0.50271	1	aflL/ verB/ desaturase/ P450 monooxygenase
54	CADAFLAG00007802	AFLA_139260	461.915	637.429	4489.51	4170.28	2788.53	1216.85	1575.21	1035.07	-0.46464	0.10641	1.1964	0.60581	1	0.82139	0.032643	1	aflG/ avnA/ ord-1/ cytochrome P450 monooxygenase
54	CADAFLAG00007803	AFLA_139270	522.491	753.094	3062.57	4793.63	1902.21	1375.9	1810.7	1220.92	-0.52742	-0.64637	0.4673	0.56858	1	4.2745e-06	1	1	aflNa/ hypD/ hypothetical protein
54	CADAFLAG00007804	AFLA_139280	247.779	319.684	2393.08	2248.04	1486.37	652.444	849.131	517.305	-0.3676	0.090199	1.1879	0.71497	1	0.94359	0.048269	1	aflN/ verA/ monooxygenase
54	CADAFLAG00007805	AFLA_139290	16.6609	20.8662	132.765	128.834	82.4606	43.7913	48.6739	33.7408	-0.32471	0.043364	0.91306	0.52865	1	1	1	1	aflMa/ hypE/ hypothetical protein
54	CADAFLAG00007806	AFLA_139300	290.201	368.16	2145.89	2553.95	1332.85	764.193	964.692	594.887	-0.34328	-0.25115	0.80251	0.69745	1	0.27733	0.48337	1	aflM/ ver-1/ dehydrogenase/ ketoreductase
54	CADAFLAG00007807	AFLA_139310	947.526	1166.61	6931.98	8026.93	4305.54	2495.83	3032.04	1890.25	-0.30009	-0.21158	0.78667	0.68171	1	0.31124	0.41515	1	aflE/ norA/ aad/ adh-2/ NOR reductase/ dehydrogenase
54	CADAFLAG00007808	AFLA_139320	685.186	961.062	5552.27	6799.06	3448.6	1804.72	2568.31	1561.19	-0.48813	-0.29226	0.93423	0.71817	1	0.095606	0.19587	1	aflJ/ estA/ esterase
54	CADAFLAG00007809	AFLA_139330	711.548	880.446	6057.77	6935.11	3762.53	1873.43	2619.62	1428.59	-0.30727	-0.19513	1.006	0.87476	1	0.38929	0.09302	1	aflH/ adhA/ short chain alcohol dehydrogenase
54	CADAFLAG00007810	AFLA_139340	312.636	410.842	1859.01	1849.74	1154.66	822.076	698.648	666.887	-0.3941	0.0072072	0.49013	0.067123	1	1	0.9107	1	aflS/ pathway regulator
54	CADAFLAG00007811	AFLA_139360	89.1735	124.119	544.274	544.141	338.065	235.107	205.485	201.613	-0.47704	0.00035295	0.52398	0.027445	1	1	1	1	aflR / apa-2 / afl-2 / transcription activator
54	CADAFLAG00007812	AFLA_139370	468.658	517.515	3368.21	3740.48	2092.09	1233.17	1412.75	840.368	-0.14307	-0.15124	0.76257	0.74942	1	0.62378	0.38421	1	aflB / fas-1 / fatty acid synthase beta subunit
54	CADAFLAG00007813	AFLA_139380	474.363	558.953	4613.12	4173.34	2865.34	1248.66	1576.08	908.317	-0.23674	0.14454	1.1983	0.79507	1	0.70569	0.019042	1	aflA / fas-2 / hexA / fatty acid synthase alpha subunit
54	CADAFLAG00007814	AFLA_139390	1122.01	1192	9225.71	10100.9	5730.2	2952.96	3815.16	1937.7	-0.087299	-0.13076	0.95642	0.97739	1	0.66462	0.093624	0.85988	aflD / nor-1 / reductase
54	CADAFLAG00007815	AFLA_139400	372.046	444.398	3354.99	3508.14	2083.85	978.937	1325.26	720.408	-0.25637	-0.064397	1.09	0.87939	1	1	0.048782	1	aflCa / hypC / hypothetical protein
54	CADAFLAG00007816	AFLA_139410	1452.4	1469.69	13961.3	11366.2	8671.94	3822.42	4292.5	2391.08	-0.017072	0.29669	1.1819	0.84415	1	0.30404	0.010141	1	aflC / pksA / pksL1 / polyketide synthase
54	CADAFLAG00007817	AFLA_139420	207.62	340.787	2270.72	1602.68	1410.41	546.479	605.277	551.157	-0.71493	0.50266	1.3679	0.13513	1	0.002274	0.0091007	1	aflT / aflT / transmembrane protein
54	CADAFLAG00007818	AFLA_139430	13.7499	20.3211	122.187	106.757	75.8951	36.2307	40.3209	32.8101	-0.56355	0.19477	1.0668	0.29739	1	1	1	1	aflU / cypA / P450 monooxygenase
54	CADAFLAG00007819	AFLA_139440	4.8128	11.1729	56.058	51.0097	34.8169	12.724	19.2565	17.9972	-1.215	0.13615	1.4522	0.097569	1	1	1	1	aflF / norB / dehydrogenase
54	CADAFLAG00007820	AFLA_139450	0.435492	0	0.390464	1.25792	0.242399	0	0.474066	0.693116		-1.6878		-0.54801	1	1	1	1	conserved hypothetical protein
54	CADAFLAG00007821	AFLA_139460	34.8557	35.8892	263.068	118.325	163.396	91.2607	44.683	57.5246	-0.042157	1.1527	0.84031	-0.36445	1	0.0014729	0.85626	1	MFS multidrug transporter, putative
54	CADAFLAG00007822	AFLA_139470	27.3364	31.2517	59.4449	68.8436	36.9213	71.8013	25.9926	50.1816	-0.19311	-0.21177	-0.95956	-0.94906	1	1	1	1	FAD dependent oxidoreductase, putative
54	CADAFLAG00007823	AFLA_139480	21.4737	48.9137	50.8171	90.6981	31.5633	56.5152	34.2464	78.532	-1.1877	-0.83576	-0.84039	-1.1973	1	0.27969	1	1	dimethylallyl tryptophan synthase, putative
54	CADAFLAG00007824	AFLA_139490	8.28954	10.3451	9.64689	12.0618	5.99121	21.7306	4.5532	16.6546	-0.31959	-0.3223	-1.8588	-1.871	1	1	1	1	hybrid PKS/NRPS enzyme, putative
54	CADAFLAG00007825	AFLA_139500	0	0	0	0	0	0	0	0						1	1		Fungal specific transcription factor domain containing protein
55	CADAFLAG00007831	AFLA_139560	10.1097	10.4778	23.5476	31.8941	14.626	26.564	12.0499	17.0427	-0.051604	-0.43771	-0.86093	-0.50013	1	1	1	1	C6 transcription factor, putative
55	CADAFLAG00007832	AFLA_139570	0	0	0.524791	0	0.326002	0	0	0						1	1		hypothetical protein
55	CADAFLAG00007833	AFLA_139580	0	0	0	0	0	0	0	0									gulonolactone oxidase, putative
55	CADAFLAG00007834	AFLA_139590	0	0	0	0	0	0	0	0									choline dehydrogenase, putative
55	CADAFLAG00007835	AFLA_139600	0	0	0.195232	0	0.121199	0	0	0						1	1		glucose-methanol-choline (gmc) oxidoreductase, putative
55	CADAFLAG00007836	AFLA_139610	1.17254	0.588354	4.42402	7.03008	2.74801	3.05722	2.65694	0.97432	0.99488	-0.66819	-0.15383	1.4473	1	1	1	1	ceramidase, putative
55	CADAFLAG00007837	AFLA_139620	0	0.870983	0.689571	2.76267	0.428403	0	1.04367	1.38623		-2.0023		-0.40951	1	1	1	1	amino acid permease family protein
55	CADAFLAG00007838	AFLA_139630	5.98534	16.298	8.56686	12.3086	5.32041	15.7812	4.64874	26.8493	-1.4452	-0.52283	-1.5686	-2.53	1	1	1	1	ABC multidrug transporter, putative
55	CADAFLAG00007839	AFLA_139640	0	8.0841	0.854351	0	0.530804	0	0	13.3593					1	1	1	1	hypothetical protein
55	CADAFLAG00007840	AFLA_139650	0	4.20499	0	0	0	0	0	6.90738					1			1	hypothetical protein
55	CADAFLAG00007841	AFLA_139660	0	0	0	0	0	0	0	0									Nonribosomal peptide synthase, putative

## Sheet: Backbone gene
Cluste ID	Backbone_gene_id	Annotated_gene_function	Chromosome-Contig	Gene_order	5'_end	3'_end	SMURF_backbone_gene_prediction
1	AFLA_002900	polyketide synthase, putative	1569	250	646830	639511	PKS
	AFLA_004300	dimethylallyl tryptophan synthase, putative	1569	390	1068014	1066674	DMAT
2	AFLA_004450	nonribosomal peptide synthase, putative	1569	405	1115175	1131702	NRPS
3	AFLA_005320	polyketide synthase, putative	1569	491	1413778	1405582	PKS
4	AFLA_005440	nonribosomal peptide synthase, putative	1569	503	1450225	1442264	NRPS
5	AFLA_006170	polyketide synthetase PksP	1569	576	1671252	1664602	PKS
6	AFLA_008770	nonribosomal peptide synthase, putative	1739	143	349578	333887	NRPS
7	AFLA_010000	polyketide synthase, putative	1739	266	687862	693859	PKS
7	AFLA_010010	nonribosomal peptide synthase, putative	1739	267	694790	699670	NRPS
7	AFLA_010020	nonribosomal peptide synthase, putative	1739	268	704524	700414	NRPS
8	AFLA_010580	nonribosomal peptide synthase, putative	1739	324	815096	838441	NRPS
8	AFLA_010620	nonribosomal siderophore peptide synthase Sid2	1739	328	848792	855147	NRPS
9	AFLA_017840	NRPS-like enzyme, putative	1866	499	1361134	1364487	NRPS-Like
10	AFLA_023020	NRPS-like enzyme, putative	1918	13	37421	34356	NRPS-Like
11	AFLA_028720	NRPS-like enzyme, putative	1918	582	1595382	1592347	NRPS-Like
12	AFLA_038600	nonribosomal peptide synthase, putative	2043	44	152441	143335	NRPS
13	AFLA_041610	NRPS-like enzyme, putative	2043	345	904196	901113	NRPS-Like
14	AFLA_045490	dimethylallyl tryptophan synthase, putative	2043	733	1949614	1948240	DMAT
15	AFLA_053870	polyketide synthase, putative	2091	591	1697503	1688441	PKS
16	AFLA_054090	polyketide synthase, putative	2091	613	1755004	1746910	PKS
17	AFLA_054270	NRPS-like enzyme, putative	2091	631	1804577	1800767	NRPS-Like
18	AFLA_060020	PKS-like enzyme, putative	2258	538	1406717	1410633	PKS-Like
19	AFLA_060680	dimethylallyl tryptophan synthase, putative	2258	604	1586324	1584884	DMAT
20	AFLA_062820	polyketide synthase, putative	2258	818	2161415	2153493	PKS
20	AFLA_062860	polyketide synthase, putative	2258	822	2170305	2177042	PKS
21	AFLA_064240	nonribosomal peptide synthase, putative	2368	7	35391	25905	NRPS
22	AFLA_064560	nonribosomal peptide synthase, putative	2368	39	106889	101963	NRPS
23	AFLA_066720	nonribosomal peptide synthase, putative	2368	255	655460	671802	NRPS
23	AFLA_066840	hybrid NRPS/PKS enzyme, putative	2368	267	716533	704693	HYBRID
23	AFLA_066980	polyketide synthase, putative	2368	281	742432	749952	PKS
24	AFLA_069330	nonribosomal peptide synthase Pes1	2368	516	1362826	1378774	NRPS
25	AFLA_070860	nonribosomal peptide synthase, putative	2368	669	1830330	1819006	NRPS
25	AFLA_070920	NRPS-like enzyme, putative	2368	675	1842755	1845781	NRPS-Like
26	AFLA_079400	NRPS-like enzyme, putative	2504	723	1901221	1905057	NRPS-Like
	AFLA_080490	polyketide synthase, putative	2504	832	2230534	2221246	PKS
27	AFLA_082150	polyketide synthase, putative	2504	998	2646293	2652837	PKS
28	AFLA_082480	NRPS-like enzyme, putative	2504	1031	2730816	2732067	NRPS-Like
29	AFLA_083250	dimethylallyl tryptophan synthase, putative	2504	1108	2938131	2936772	DMAT
30	AFLA_084080	dimethylallyl tryptophan synthase, putative	2504	1191	3177863	3178998	DMAT
31	AFLA_090190	dimethylallyl tryptophan synthase, putative	2541	113	300318	298721	DMAT
31	AFLA_090200	nonribosomal peptide synthase, putative	2541	114	302181	307436	NRPS
32	AFLA_096770	polyketide synthase, putative	2541	771	2022113	2025146	PKS
	AFLA_100340	nonribosomal peptide synthase, putative	2634	327	862490	866167	NRPS
33	AFLA_101700	NRPS-like enzyme, putative	2634	463	1202090	1198962	NRPS-Like
34	AFLA_104210	PKS-like enzyme, putative	2689	3	16695	14187	PKS-Like
35	AFLA_105190	NRPS-like enzyme, putative	2689	101	272459	275785	NRPS-Like
36	AFLA_105450	polyketide synthase, putative	2689	127	336825	345056	PKS
37	AFLA_108550	polyketide synthase, putative	2689	437	1150207	1144762	PKS
38	AFLA_109430	nonribosomal siderophore peptide synthase SidC	2689	525	1416093	1401753	NRPS
39	AFLA_112840	polyketide synthase, putative	2689	866	2307795	2314799	PKS
40	AFLA_114820	polyketide synthase, putative	2802	63	153643	159213	PKS
41	AFLA_116220	polyketide synthase, putative	2842	50	121844	128309	PKS
42	AFLA_116600	dimethylallyl tryptophan synthase, putative	2842	88	206389	207845	DMAT
43	AFLA_116890	polyketide synthase, putative	2842	117	296613	304403	PKS
44	AFLA_118440	NRPS-like enzyme, putative	2842	272	713528	710225	NRPS-Like
45	AFLA_118940	polyketide synthase, putative	2842	322	847665	840026	PKS
45	AFLA_118960	polyketide synthase, putative	2842	324	856341	849580	PKS
46	AFLA_119110	NRPS-like enzyme, putative	2842	339	896447	899760	NRPS-Like
47	AFLA_121520	NRPS-like enzyme, putative	2842	580	1482390	1479298	NRPS-Like
	AFLA_126710	polyketide synthase, putative	2856	368	935426	927088	PKS
48	AFLA_127090	polyketide synthase, putative	2856	406	1031825	1039696	PKS
49	AFLA_128060	polyketide synthase, putative	2856	503	1314426	1322999	PKS
50	AFLA_128170	NRPS-like enzyme, putative	2856	514	1361595	1364900	NRPS-Like
51	AFLA_129930	3-oxoacyl carrier protein synthase, putative	2856	690	1853766	1855767	PKS-Like
52	AFLA_135490	nonribosomal peptide synthase, putative	2911	441	1209037	1212252	NRPS
53	AFLA_137870	polyketide synthase, putative	2911	679	1868122	1875473	PKS
54	AFLA_139410	aflC / pksA / pksL1 / poleketide synthase	2911	832	2239960	2246583	PKS
54	AFLA_139480	dimethylallyl tryptophan synthase, putative	2911	839	2264978	2263609	DMAT
54	AFLA_139490	hybrid PKS/NRPS enzyme, putative	2911	840	2265957	2277677	HYBRID
55	AFLA_139670	nonribosomal peptide synthase, putative	2911	858	2328824	2336256	NRPS
